# Supplementary material
Source: PubMed Central journal article supplement (PMC2777113)
Supplement: E09-01-0002_1.pdf [file E09-01-0002_1.pdf]

## Summary of Supplementary Data

|   | <b>Title</b>                               | <b>Description</b>                                                                          |
|---|--------------------------------------------|---------------------------------------------------------------------------------------------|
| 1 | Summary                                    | Summary of Supplementary Data                                                               |
| 2 | <i>C. albicans</i> dataset                 | Fold changes for all <i>C. albicans</i> genes                                               |
| 3 | <i>C. albicans</i> Venn Diagrams           | Venn diagrams comparing the number of genes regulated by low, medium and high glucose       |
| 4 | <i>S. cerevisiae</i> dataset               | Fold changes for all <i>S. cerevisiae</i> genes [Yin <i>et al.</i> (2003) data re-analysed] |
| 5 | <i>C. albicans</i> vs <i>S. cerevisiae</i> | Comparison of fold changes for homologues in <i>C. albicans</i> and <i>S. cerevisiae</i>    |
| 6 | Functions                                  | Regulation of genes involved in central metabolism, stress and ribosome biogenesis          |
| 7 | Mitochondrial Functions                    | Comparison of <i>C. albicans</i> and <i>S. cerevisiae</i> Mitochondrial Functions           |
| 8 | PCR primers                                | PCR primers to generate gene-specific probes                                                |

## Complete *C. albicans* dataset

Heatmap Scale

|      |      |       |       |
|------|------|-------|-------|
| >=10 | 5.00 | 0.00  | -5.00 |
| 9.62 | 4.62 | -0.38 | -5.38 |
| 9.23 | 4.23 | -0.77 | -5.77 |
| 8.85 | 3.85 | -1.15 | -6.15 |
| 8.46 | 3.46 | -1.54 | -6.54 |
| 8.08 | 3.08 | -1.92 | -6.92 |
| 7.69 | 2.69 | -2.31 | -7.31 |
| 7.31 | 2.31 | -2.69 | -7.69 |
| 6.92 | 1.92 | -3.08 | -8.08 |
| 6.54 | 1.54 | -3.46 | -8.46 |
| 6.15 | 1.15 | -3.85 | -8.85 |
| 5.77 | 0.77 | -4.23 | -9.23 |
| 5.38 | 0.38 | -4.62 | <=-10 |

| Gene Name<br>Systematic | Common     | Expression ratio<br>Glucose Concentration (%) |      |      |      | Description                                                 | <i>S. cerevisiae</i> homologue | orf19. Number |
|-------------------------|------------|-----------------------------------------------|------|------|------|-------------------------------------------------------------|--------------------------------|---------------|
|                         |            | 0                                             | 0.01 | 0.1  | 1    |                                                             |                                |               |
| CA1067                  | HXT62      | 1.3                                           | 45.4 | 34.6 | 42.5 | sugar transporter                                           | YDR345c                        | orf19.2023    |
| CA1069                  | HXT5.3F    | 1.4                                           | 17.4 | 15.9 | 15.9 | sugar transporter, 3-prime end                              |                                | orf19.2021    |
| CA0495                  | IPF20056   | -1.0                                          | 12.8 | 8.1  | 13.5 | unknown function                                            | YER067w                        | orf19.2659    |
| CA3707                  | TYE7       | -1.1                                          | 16.4 | 15.0 | 11.4 | Basic helix-loop-helix transcription factor by homology     | YOR344c                        | orf19.4941    |
| CA2474                  | PDC11      | -1.1                                          | 9.2  | 6.4  | 9.7  | Pyruvate decarboxylase (by homology)                        | YLR044c                        | orf19.2877    |
| CA5788                  | RHR2       | 1.0                                           | 9.7  | 8.1  | 9.4  | DL-glycerol phosphatase                                     | YIL053w                        | orf19.5437    |
| CA3112                  | PFK2       | -1.0                                          | 9.6  | 8.3  | 8.5  | 6-phosphofructokinase, beta subunit                         | YMR205c                        | orf19.6540    |
| CA0127                  | HXK2.3F    | -1.1                                          | 9.5  | 9.7  | 7.9  | hexokinase II, 3-prime end (by homology)                    | YGL253w                        | orf19.8176    |
| CA4127                  | IPF6629    | 1.7                                           | 5.0  | 7.2  | 7.7  | unknown function                                            | YLR109w                        | orf19.2762    |
| CA1579                  | GDH3       | 1.0                                           | 6.8  | 11.1 | 7.4  | NADP-glutamate dehydrogenase (by homology)                  | YOR375c                        | orf19.4716    |
| CA4570                  | IPF9550    | -1.1                                          | 8.4  | 7.2  | 7.3  | similar to <i>Saccharomyces cerevisiae</i> Osm1p osmotic gr | YJR051w                        | orf19.6882    |
| CA4501                  | QDR1       | 1.0                                           | 8.1  | 13.2 | 7.0  | putative antibiotic resistance proteins (by homology)       | YIL120w                        | orf19.8138    |
| CA1834                  | PFK1       | -1.2                                          | 6.9  | 6.1  | 6.6  | 6-phosphofructokinase, alpha subunit                        | YGR240c                        | orf19.3967    |
| CA2075                  | IFE2       | -1.1                                          | 8.2  | 10.6 | 6.3  | Unknown function                                            |                                | orf19.5288    |
| CA0943                  | YHB1       | -1.1                                          | 4.4  | 5.1  | 6.2  | flavohemoglobin (by homology)                               | YGR234w                        | orf19.3707    |
| CA2832                  | CRD1       | 1.0                                           | 6.8  | 7.7  | 5.9  | Cu-transporting P1-type ATPase                              |                                | orf19.4784    |
| CA5066                  | TPS2       | 1.2                                           | 3.9  | 4.8  | 4.9  | Threolose-6-phosphate phosphatase (by homology)             | YDR074w                        | orf19.3038    |
| CA3895                  | CDR4       | 1.0                                           | 4.2  | 6.8  | 4.8  | Multidrug resistance protein                                |                                | orf19.5079    |
| CA4492                  | RNR22      | -1.0                                          | 2.8  | 5.3  | 4.8  | ribonucleoside-diphosphate reductase (by homology)          |                                | orf19.1868    |
| CA1464                  | PYC2.EXON2 | -1.2                                          | 5.4  | 6.4  | 4.6  | Pyruvate carboxylase 2 (by homology)                        | YBR218c                        | orf19.789     |
| CA4030                  | EBP4       | 1.0                                           | 4.4  | 6.0  | 4.4  | NADPH dehydrogenase (by homology)                           | YHR179w                        | orf19.3433    |
| CA3483                  | CDC19      | -1.1                                          | 3.2  | 2.1  | 4.2  | pyruvate kinase (by homology)                               | YAL038w ; Missing in array     | orf19.3575    |
| CA0302                  | MEP3       | -1.0                                          | 3.0  | 4.3  | 4.0  | low affinity high capacity ammonium permease (by hom        | YPR138c                        | orf19.9181    |
| CA4155                  | RNR21      | 1.2                                           | 2.9  | 2.7  | 4.0  | ribonucleoside-diphosphate reductase (by homology)          | YJL026w                        | orf19.5801    |
| CA1678                  | IPF5185    | 1.6                                           | 4.2  | 5.6  | 3.9  | putative cell wall protein (by homology)                    | YAR050w                        | orf19.3618    |
| CA1070                  | HXT61      | 1.2                                           | 4.6  | 8.0  | 3.9  | sugar transporter                                           | YDR343c                        | orf19.2020    |
| CA2225                  | SUR2       | 1.0                                           | 3.3  | 4.8  | 3.8  | Hydroxylation of C-4 of the sphingoid moiety of ceramid     | YDR297w                        | orf19.5818    |
| CA0689                  | IPF14119   | 1.4                                           | 2.7  | 3.7  | 3.5  | unknown function                                            |                                | orf19.12157   |

|         |            |      |     |     |     |                                                               |         |             |
|---------|------------|------|-----|-----|-----|---------------------------------------------------------------|---------|-------------|
| CA1564  | GAD1       | 1.0  | 2.8 | 3.4 | 3.4 | Glutamate decarboxylase (by homology)                         | YMR250w | orf19.1153  |
| CA1330  | IPF11713   | 1.5  | 2.8 | 3.4 | 3.4 | unknown function                                              |         | orf19.8744  |
| CA3142  | IPF9211.5F | 1.3  | 3.6 | 3.9 | 3.3 | unknown function, 3-prime end                                 |         | orf19.3713  |
| CA4707  | PTR21      | -1.0 | 2.6 | 3.4 | 3.2 | peptide transporter                                           | YKR093w | orf19.6937  |
| CA3590  | ARE2       | 1.2  | 2.2 | 3.6 | 3.0 | acyl-CoA sterol acyltransferase-like (by homology)            | YNR019w | orf19.2248  |
| CA5467  | GSY1       | -1.0 | 2.3 | 2.7 | 3.0 | UDP glucose--starch glucosyltransferase, glycogen syn         | YFR015c | orf19.3278  |
| CA2938  | IPF8321    | -1.0 | 2.4 | 3.1 | 3.0 | similar to <i>Saccharomyces cerevisiae</i> Glg2p self-glucosy | YJL137c | orf19.3325  |
| CA4633  | NDH1       | -1.2 | 3.1 | 3.7 | 2.9 | Mitochondrial NADH dehydrogenase                              | YMR145c | orf19.339   |
| CA2452  | IPF9955    | 1.1  | 3.1 | 4.8 | 2.9 | unknown function                                              |         | orf19.10993 |
| CA2021  | IPF17283   | 1.1  | 2.8 | 2.3 | 2.9 | unknown function                                              | YCR061w | orf19.4907  |
| CA4111  | IPF3964    | 1.1  | 3.6 | 4.1 | 2.8 | unknown function                                              |         | orf19.675   |
| CA4569  | IPF9552    | 1.1  | 3.1 | 3.4 | 2.8 | unknown function                                              | YPR107c | orf19.6881  |
| CA2520  | IPF20104   | 1.2  | 2.7 | 3.9 | 2.7 | alcohol dehydrogenase (by homology)                           | YMR318c | orf19.5517  |
| CA5322  | PRB1       | 1.3  | 1.9 | 3.2 | 2.7 | Protease B, vacuolar (by homology)                            | YEL060c | orf19.7196  |
| CA1199  | IPF10404   | 1.0  | 3.4 | 5.8 | 2.7 | unknown function                                              | YBL049w | orf19.10876 |
| CA3141  | IPF9211.3F | 1.4  | 2.6 | 4.9 | 2.7 | unknown function, 3-prime end                                 |         | orf19.3712  |
| CA3160  | ZRT2       | 1.2  | 2.7 | 3.8 | 2.6 | zinc transport protein (by homology)                          | YLR130c | orf19.1585  |
| CA1691  | PGK1       | 1.0  | 2.5 | 2.4 | 2.5 | Phosphoglycerate kinase                                       | YCR012w | orf19.3651  |
| CA5144  | IPF1019    | 1.5  | 2.2 | 3.1 | 2.5 | unknown function                                              | YJR013w | orf19.4581  |
| CA1315  | URA2.5EOC  | -1.0 | 2.6 | 3.2 | 2.5 | multifunctional pyrimidine biosynthesis protein, 5-prime      | YJL130c | orf19.9896  |
| CA4199  | UBC8       | 1.3  | 2.1 | 3.6 | 2.5 | ubiquitin-conjugating enzyme (by homology)                    | YEL012w | orf19.4540  |
| CA2214  | IPF9939    | 1.1  | 2.8 | 4.2 | 2.5 | similar to <i>Saccharomyces cerevisiae</i> Msn4p transcriptio | YKL062w | orf19.4752  |
| CA5476  | IPF8527    | 1.0  | 2.3 | 2.7 | 2.5 | unknown function                                              |         | orf19.5305  |
| CA4611  | IPF10727   | -1.1 | 2.3 | 3.9 | 2.5 | unknown function                                              |         | orf19.3302  |
| CA1688  | COX15      | -1.1 | 2.0 | 2.6 | 2.5 | cytochrome oxidase assembly factor (by homology)              | YER141w | orf19.3656  |
| CA3030  | IPF19968   | 1.1  | 2.1 | 2.5 | 2.4 | putative cell wall protein of the PIR family                  | YKL164c | orf19.220   |
| CA5494  | IPF85      | 1.1  | 3.8 | 3.4 | 2.4 | similar to <i>Saccharomyces cerevisiae</i> Tis11p tRNA-spec   | YLR136c | orf19.5334  |
| CA4951  | IPF13607   | 1.1  | 2.2 | 3.6 | 2.4 | unknown function                                              | YJL108c | orf19.6527  |
| 11759.2 |            | 1.1  | 4.3 | 9.2 | 2.4 |                                                               |         |             |
| CA2181  | ECM331     | 1.1  | 2.5 | 2.8 | 2.4 | Involved in cell wall biogenesis and architecture (by hon     | YDR055w | orf19.4255  |
| CA4516  | IPF18207   | -1.1 | 2.1 | 2.0 | 2.3 | unknown function                                              | YPL170w | orf19.489   |
| CA3334  | ALP1       | 1.4  | 1.8 | 2.3 | 2.3 | amino-acid permease (by homology)                             |         | orf19.2337  |
| CA4164  | IPF9302    | 1.4  | 2.4 | 3.2 | 2.3 | unknown function                                              | YOR052c | orf19.13235 |
| CA0887  | IPF12383   | 1.1  | 2.3 | 2.3 | 2.3 | unknown function                                              | YIL003w | orf19.1387  |
| CA2493  | IPF7227    | -1.0 | 2.0 | 2.4 | 2.3 | putative fatty acid desaturase (by homology)                  |         | orf19.4048  |
| CA0104  | RBT4       | 1.4  | 2.2 | 2.9 | 2.2 | repressed by TUP1 protein                                     |         | orf19.13583 |
| CA0576  | NPR1       | 1.1  | 2.0 | 2.7 | 2.2 | nitrogen permease reactivator protein (by homology)           | YNL183c | orf19.6232  |
| CA4671  | GPM1       | -1.1 | 2.2 | 1.9 | 2.2 | phosphoglycerate mutase (by homology)                         | YKL152c | orf19.903   |
| CA5950  | TPI1       | 1.1  | 2.2 | 2.3 | 2.2 | Triose phosphate isomerase                                    | YDR050c | orf19.6745  |
| CA5505  | TPS3.3     | -1.1 | 2.2 | 1.9 | 2.2 | alpha, alpha-trehalose-phosphate synthase, regulatory s       | YMR261c | orf19.5348  |
| CA5892  | GAP1       | 1.1  | 1.9 | 2.1 | 2.1 | Glyceraldehyde-3-phosphate dehydrogenase                      | YGR192c | orf19.6814  |
| CA4874  | IPF1674    | 1.0  | 2.5 | 2.1 | 2.1 | putative transcription initiation factor (by homology)        | YNL108c | orf19.6559  |
| CA3637  | IPF9255    | -1.1 | 2.5 | 3.1 | 2.1 | unknown function                                              | YGR017w | orf19.5136  |
| CA4827  | SMF2       | -1.1 | 2.0 | 3.3 | 2.1 | Manganese transporter (by homology)                           | YLR034c | orf19.2069  |
| CA0824  | GPD2       | -1.1 | 1.9 | 2.2 | 2.1 | Glycerol 3-phosphate dehydrogenase (by homology)              |         | orf19.691   |
| CA1964  | IFR2       | -1.0 | 2.3 | 2.4 | 2.1 | unknown function                                              |         | orf19.2396  |
| CA4220  | IPF8762    | -1.0 | 1.8 | 3.5 | 2.1 | unknown function                                              |         | orf19.822   |
| CA3365  | ALG6       | 1.3  | 1.8 | 2.5 | 2.1 | glucosyltransferase (by homology)                             | YOR002w | orf19.1843  |
| CA5180  | FBA1       | -1.2 | 2.1 | 1.6 | 2.1 | fructose-bisphosphate aldolase (by homology)                  | YKL060c | orf19.4618  |

|        |             |      |      |      |     |                                                                                               |          |             |
|--------|-------------|------|------|------|-----|-----------------------------------------------------------------------------------------------|----------|-------------|
| CA5497 | IPF776      | -1.0 | 2.3  | 2.3  | 2.1 | transcriptional activator (by homology)                                                       |          | orf19.5338  |
| CA5142 | IPF1022     | 1.4  | 1.6  | 2.4  | 2.1 | similar to <i>Saccharomyces cerevisiae</i> Erv29p ER-Golgi t                                  | YGR284c  | orf19.4579  |
| CA4657 | IPF3094     | 1.1  | 2.2  | 2.6  | 2.1 | 4-nitrophenyl phosphatase (by homology)                                                       | YDL236w  | orf19.4444  |
| CA6066 | CDR1        | -1.1 | 2.0  | 1.6  | 2.0 | multidrug resistance protein (by homology)                                                    | YOR153w  | orf19.6000  |
| CA0413 | ALS12.3F    | 1.1  | 1.8  | 3.7  | 2.0 | agglutinin-like protein, 3-prime end                                                          |          | orf19.2122  |
| CA1356 | IPF10138.5F | 1.1  | 2.4  | 2.1  | 2.0 | unknown function, 5-prime end                                                                 | YNR018w  | orf19.409   |
| CA0875 | ERG251      | -1.0 | 1.8  | 1.8  | 2.0 | C-4 sterol methyl oxidase (by homology)                                                       |          | orf19.12101 |
| CA1339 | IPF5330     | 1.5  | 2.3  | 2.9  | 2.0 | unknown function                                                                              |          | orf19.10952 |
| CA4852 | SCS7        | 1.1  | 1.7  | 4.1  | 2.0 | Required for hydroxylation of ceramide (by homology)                                          | YMR272c  | orf19.3822  |
| CA2782 | IPF3806     | 1.0  | 1.6  | 2.1  | 2.0 | unknown function                                                                              | YNL157w  | orf19.285   |
| CA1525 | AGP3        | 1.0  | 1.7  | 2.8  | 2.0 | amino acid-permease (by homology)                                                             | YFL055w  | orf19.3795  |
| CA3923 | ADH2        | 1.2  | 2.4  | 2.1  | 2.0 | alcohol dehydrogenase I (by homology)                                                         | YOL086c  | orf19.5113  |
| CA1528 | ALS4.3F     | 1.2  | 2.0  | 3.9  | 2.0 | agglutinin-like protein, 3-prime end                                                          |          | orf19.4556  |
| CA6000 | FDH11.3     | 1.0  | 1.9  | 1.8  | 2.0 | glutathione-dependent formaldehyde dehydrogenase, 3                                           | YDL168w  | orf19.7600  |
| CA1353 | ERG1        | 1.2  | 1.6  | 2.4  | 2.0 | squalene epoxidase                                                                            | YGR175c  | orf19.406   |
| CA5078 | IPF15297    | 1.3  | 1.9  | 1.7  | 2.0 | unknown function                                                                              |          | orf19.3053  |
| CA5985 | IPF907      | -1.2 | 1.9  | 1.9  | 2.0 | unknown function                                                                              |          | orf19.7583  |
| CA4022 | FRP6        | 1.1  | 1.7  | 2.9  | 2.0 | member of the FRP family of proteins related to <i>Yarrowia lipolytica</i> glyoxylate pathway |          | orf19.3441  |
| CA2302 | IPF6518     | -1.0 | 1.9  | 1.8  | 1.9 | unknown function                                                                              |          | orf19.1691  |
| CA4696 | HTA1        | 1.5  | 1.7  | 1.6  | 1.9 | Histone H2A (by homology)                                                                     | YDR225w  | orf19.6924  |
| CA0183 | CAP1        | -1.0 | 1.8  | 2.2  | 1.9 | transcriptional activator (by homology)                                                       | YML007w  | orf19.9191  |
| CA1974 | IPF10410    | 1.2  | 2.1  | 2.7  | 1.9 | unknown function                                                                              | YLR021w  | orf19.5227  |
| CA3305 | RPL29       | 2.1  | 1.6  | 1.7  | 1.9 | ribosomal protein, cytosolic (by homology)                                                    | YFR032ca |             |
| CA2853 | IPF17057    | 1.3  | 1.6  | 1.8  | 1.9 | unknown function                                                                              | YMR010w  | orf19.1070  |
| CA2761 | IPF15013    | -1.1 | 2.2  | 2.1  | 1.9 | pyruvate decarboxylase regulatory protein (by homology)                                       |          | orf19.13071 |
| CA3200 | IPF3439     | 1.2  | 1.4  | 2.0  | 1.9 | unknown function                                                                              | YDL054c  | orf19.6180  |
| CA4566 | IPF19801    | 1.0  | 1.5  | 1.4  | 1.9 | unknown function                                                                              |          | orf19.6877  |
| CA3988 | IPF7145     | 1.1  | 1.5  | 1.8  | 1.9 | unknown function                                                                              | YDL072c  | orf19.1564  |
| CA1570 | IPF7617     | 1.4  | 1.7  | 1.9  | 1.9 | unknown function                                                                              | YHR181w  | orf19.1160  |
| CA2545 | RRP9        | -1.1 | -1.1 | 1.0  | 1.8 | U3 small nucleolar ribonucleoprotein-associated protein                                       | YPR137w  | orf19.2830  |
| CA4515 | IPF16652    | 1.2  | 1.6  | 1.6  | 1.8 | unknown function                                                                              | YOR253w  | orf19.490   |
| CA6099 | CDR2        | 1.0  | 2.0  | 2.2  | 1.8 | <i>Candida albicans</i> drug resistance protein 2                                             |          | orf19.5958  |
| CA4424 | PMT1        | 1.1  | 1.5  | 2.0  | 1.8 | mannosyltransferase                                                                           | YDL095w  | orf19.5171  |
| CA4314 | PMT4        | 1.0  | 1.6  | 2.1  | 1.8 | Mannosyltransferase (by homology)                                                             | YJR143c  | orf19.4109  |
| CA0311 | DAK2.3EOC   | -1.1 | 2.1  | 2.4  | 1.8 | dihydroxyacetone kinase, 3-prime end (by homology)                                            |          |             |
| CA4016 | GFA1        | -1.2 | 1.8  | 1.8  | 1.8 | glutamine:fructose-6-phosphate amidotransferase                                               | YKL104c  | orf19.1618  |
| CA3639 | IPF9251     | 1.0  | 1.9  | 1.9  | 1.8 | unknown function                                                                              | YOR363c  | orf19.5133  |
| CA2189 | AOX2        | 1.0  | 1.7  | 2.9  | 1.8 | alternative oxidase (by homology)                                                             |          | orf19.4773  |
| CA2906 | IPF15523    | 1.2  | 1.3  | 1.7  | 1.8 | unknown function                                                                              | YOR246c  | orf19.4521  |
| CA5558 | IPF1969     | 1.6  | 1.6  | 1.9  | 1.8 | unknown function                                                                              | YPL225w  | orf19.7322  |
| CA5185 | NHP6A       | 1.3  | 1.3  | 1.7  | 1.8 | nonhistone chromosomal protein related to HMG1                                                | YBR089ca |             |
| CA3918 | VTC2        | 1.0  | 1.5  | 1.9  | 1.8 | putative polyphosphate synthetase (by homology)                                               | YFL004w  | orf19.4381  |
| CA4919 | TTR1        | 1.3  | 1.7  | 1.6  | 1.8 | Glutaredoxin (by homology)                                                                    | YDR513w  | orf19.6059  |
| CA0641 | IPF15977    | -1.0 | 1.8  | 2.0  | 1.8 | unknown function                                                                              |          | orf19.4698  |
| CA4551 | APT1        | 1.5  | 1.8  | 1.8  | 1.8 | adenine phosphoribosyltransferase                                                             | YML022w  | orf19.1448  |
| CA3497 | FEN11       | 1.5  | 1.6  | 2.1  | 1.8 | Fatty acid elongase required for sphingolipid formation                                       | YCR034w  | orf19.6343  |
| CA5735 | IPF2878     | 1.1  | 1.7  | 2.1  | 1.8 | unknown function                                                                              | YBR105c  | orf19.7445  |
| CA0431 | IPF7927     | -1.0 | -1.0 | -1.0 | 1.8 | putative aldose reductase (by homology)                                                       | YDL124w  | orf19.1340  |
| CA2263 | GPD1        | -1.0 | 1.3  | 1.8  | 1.8 | Glycerol-3-phosphate dehydrogenase (by homology)                                              | YOL059w  | orf19.1756  |

|        |             |      |     |     |     |                                                                        |         |             |
|--------|-------------|------|-----|-----|-----|------------------------------------------------------------------------|---------|-------------|
| CA4762 | IPF9647     | 1.2  | 1.4 | 1.6 | 1.8 | similar to <i>Saccharomyces cerevisiae</i> Ost3p oligosaccha           | YOR085w | orf19.3994  |
| CA6057 | IPF4959     | 1.3  | 2.0 | 2.8 | 1.8 | D-xylulose reductase (by homology)                                     | YDL246c | orf19.7676  |
| CA1855 | GLN1        | -1.5 | 1.7 | 1.5 | 1.8 | glutamate-ammonia ligase (by homology)                                 | YPR035w | orf19.646   |
| CA5418 | IPF1580     | 1.1  | 1.5 | 1.7 | 1.7 | unknown function                                                       | YNL190w | orf19.968   |
| CA1355 | IPF10138.3F | 1.2  | 2.0 | 2.0 | 1.7 | unknown function, 3-prime end                                          |         | orf19.408   |
| CA0616 | PHO11       | 1.0  | 2.0 | 2.9 | 1.7 | Secreted acid phosphatase                                              | YBR092c | orf19.2619  |
| CA1782 | PHO84.3EOC  | -1.1 | 1.4 | 1.4 | 1.7 | Inorganic phosphate transport protein, 3-prime end (by                 | YML123c | orf19.1172  |
| CA0083 | PHO84       | -1.1 | 1.6 | 1.3 | 1.7 | high-affinity inorganic phosphate/H <sup>+</sup> symporter by homology |         | orf19.655   |
| CA4929 | ENA22       | -1.0 | 1.6 | 1.5 | 1.7 | P-type ATPase involved in Na <sup>+</sup> efflux (by homology)         | YDR038c | orf19.6070  |
| CA3329 | IPF12162    | 1.1  | 2.0 | 2.1 | 1.7 | Unknown function                                                       | YHR067w | orf19.2670  |
| CA6151 | IPF1853     | 1.1  | 1.6 | 1.6 | 1.7 | unknown function                                                       |         | orf19.5890  |
| CA4949 | CDC34       | 1.2  | 1.6 | 2.5 | 1.7 | Ubiquitin-conjugating enzyme (by homology)                             | YDR054c | orf19.6529  |
| CA3559 | PGI1        | 1.0  | 1.7 | 1.8 | 1.7 | Glucose-6-phosphate isomerase                                          | YBR196c | orf19.3888  |
| CA0270 | PRB2        | 1.1  | 1.5 | 2.2 | 1.7 | Protease B, vacuolar (by homology)                                     |         | orf19.9783  |
| CA4571 | RPL33.3     | 1.5  | 1.2 | 1.3 | 1.7 | ribosomal protein L35a, 3-prime end                                    | YPL143w |             |
| CA0368 | IPF11646    | -1.0 | 2.0 | 2.3 | 1.7 | unknown function                                                       |         | orf19.1353  |
| CA2327 | IPF4782     | 1.0  | 1.4 | 2.2 | 1.7 | probable membrane protein (by homology)                                | YBR187w | orf19.11972 |
| CA0171 | IPF15957    | 1.6  | 1.4 | 2.1 | 1.7 | unknown function                                                       |         |             |
| CA5232 | SUN42       | 1.5  | 1.4 | 1.6 | 1.7 | Putative cell wall beta-glucosidase (by homology)                      |         | orf19.5032  |
| CA6129 | YRA1.EXON2  | 1.1  | 1.6 | 1.7 | 1.7 | RNA annealing protein, exon 2 (by homology)                            | YDR381w |             |
| CA5894 | PMT2        | 1.2  | 1.6 | 1.7 | 1.7 | O-D-mannosyltransferase (by homology)                                  | YAL023c | orf19.6812  |
| CA6010 | TRX1        | 1.5  | 1.5 | 1.8 | 1.7 | thioredoxin (by homology)                                              | YLR043c | orf19.7611  |
| CA3034 | RPN12       | 1.2  | 1.3 | 1.5 | 1.7 | 26S proteasome regulatory subunit (by homology)                        | YFR052w | orf19.213   |
| CA1957 | IPF3887     | 1.0  | 1.4 | 2.4 | 1.6 | similar to <i>Saccharomyces cerevisiae</i> Syg1p plasma mei            | YIL047c | orf19.768   |
| CA2650 | STV1        | 1.1  | 1.5 | 2.0 | 1.6 | H <sup>+</sup> -ATPase V0 domain (by homology)                         |         | orf19.1190  |
| CA0110 | IPF17190    | 1.3  | 1.5 | 2.0 | 1.6 | unknown function                                                       |         | orf19.11350 |
| CA0950 | IPF3737     | 1.4  | 1.4 | 2.0 | 1.6 | similar to <i>Saccharomyces cerevisiae</i> Aps1p AP-1 comp             | YLR170c | orf19.1012  |
| CA2016 | IPF3415     | 1.0  | 1.9 | 2.6 | 1.6 | similar to <i>Saccharomyces cerevisiae</i> Yim1p mitochondr            | YMR152w | orf19.8467  |
| CA1423 | IPF14247    | 1.3  | 1.5 | 1.6 | 1.6 | unknown function                                                       | YDR233c | orf19.3799  |
| CA5802 | IPF4164     | 1.1  | 1.5 | 1.6 | 1.6 | similar to <i>Saccharomyces cerevisiae</i> Vtc1p negative reg          | YER072w | orf19.5455  |
| CA4897 | TUB2.3      | 1.4  | 1.3 | 1.7 | 1.6 | Beta-tubulin, 3-prime end                                              | YFL037w | orf19.6034  |
| CA2043 | GSL21       | 1.1  | 1.4 | 1.6 | 1.6 | 1,3-beta-D-glucan synthase subunit                                     | YLR342w | orf19.2929  |
| CA2625 | IPF10919    | 1.4  | 1.6 | 1.8 | 1.6 | Similar to Flo1p (by homology)                                         | YLR110c | orf19.12229 |
| CA2638 | GAP3        | -1.1 | 1.5 | 1.8 | 1.6 | General amino acid permease (by homology)                              |         | orf19.4304  |
| CA2405 | IPF3844     | 1.5  | 1.5 | 1.9 | 1.6 | unknown function                                                       |         | orf19.301   |
| CA4862 | EFB1        | 1.2  | 1.4 | 1.6 | 1.6 | translation elongation factor eEF1beta                                 | YAL003w | orf19.3838  |
| CA4436 | IPF13868    | 1.2  | 1.9 | 2.5 | 1.6 | unknown function                                                       | YNL191w | orf19.5159  |
| CA3005 | CC43        | 1.2  | 1.2 | 1.6 | 1.6 | Cell Division Control -like (by homology)                              |         | orf19.13617 |
| CA3899 | DPM1        | 1.1  | 1.3 | 1.5 | 1.6 | dolichol-phosphate (beta-D) mannosyltransferase 1 by                   | YPR183w | orf19.5073  |
| CA5468 | IFF7        | 1.1  | 1.6 | 2.2 | 1.6 | unknown function                                                       |         | orf19.3279  |
| CA4363 | STE24       | 1.1  | 1.4 | 1.8 | 1.6 | zinc metallo-protease by homology                                      | YJR117w | orf19.5654  |
| CA2438 | IPF5505     | 1.1  | 1.6 | 1.9 | 1.6 | unknown function                                                       |         | orf19.2198  |
| CA0503 | PMT6        | -1.1 | 1.6 | 1.7 | 1.6 | protein mannosyltransferase                                            |         | orf19.3802  |
| CA1772 | ALG7        | 1.3  | 1.5 | 2.1 | 1.6 | UDP-N-acetylglucosamine-1-phosphate transferase (by                    | YBR243c | orf19.2187  |
| CA0202 | IPF19126    | 1.2  | 1.5 | 1.8 | 1.6 | putative aminoacid transporter (by homology)                           | YER119c | orf19.1210  |
| CA1167 | IPF16646    | 1.2  | 1.4 | 1.5 | 1.6 | unknown function                                                       | YEL001c | orf19.1782  |
| CA0988 | PMI40       | -1.0 | 1.4 | 1.9 | 1.6 | mannose-6-phosphate isomerase (PHOSPHOMANNOS                           | YER003c | orf19.8968  |
| CA2056 | URA5        | 1.2  | 1.5 | 1.5 | 1.6 | Orotate phosphoribosyltransferase (by homology)                        | YML106w | orf19.2555  |
| CA4882 | IPF1651     | 1.1  | 1.8 | 1.7 | 1.6 | purine nucleoside permease (by homology)                               |         | orf19.6570  |

|        |            |      |     |     |     |                                                                                      |             |             |
|--------|------------|------|-----|-----|-----|--------------------------------------------------------------------------------------|-------------|-------------|
| CA3336 | IPF19983   | 1.0  | 1.4 | 1.6 | 1.6 | unknown function                                                                     | YHR113w     | orf19.2335  |
| CA3372 | HHF22      | 1.3  | 1.3 | 1.5 | 1.6 | histone H4 (by homology)                                                             |             | orf19.1854  |
| CA1333 | MRF1       | 1.0  | 1.6 | 1.8 | 1.6 | mitochondrial respiratory function protein (by homology)                             |             | orf19.8742  |
| CA0938 | COX12      | 1.4  | 1.2 | 1.5 | 1.6 | cytochrome-c oxidase, subunit VIB (by homology)                                      | YLR038c     |             |
| CA4764 | GPI10      | 1.2  | 1.5 | 1.8 | 1.6 | required for Glycosyl Phosphatdyl                                                    | Inositol sy | orf19.3996  |
| CA2769 | IPF15870   | 1.5  | 1.5 | 1.4 | 1.6 | unknown function                                                                     |             | orf19.2685  |
| CA2765 | APA2       | 1.1  | 1.3 | 1.9 | 1.6 | ATP adenyllyltransferase II (by homology)                                            | YDR530c     | orf19.13075 |
| CA5171 | IPF6037    | 1.2  | 1.5 | 1.6 | 1.6 | Similar to Legionella pneumophila sbpA                                               | YAL049c     | orf19.4609  |
| CA3169 | IPF7686    | 1.0  | 1.5 | 2.0 | 1.6 | putative mitochondrial phosphate carrier protein (by hon                             | YER053c     | orf19.1395  |
| CA0601 | MSN5.3F    | -1.4 | 1.8 | 1.2 | 1.6 | Importin-beta family member required for nuclear export of Pho4p and involved in phe |             | orf19.10182 |
| CA5646 | RPS28B.3   | 1.6  | 1.5 | 1.6 | 1.6 | Ribosomal protein S28B (S33B) (YS27), 3-prime end (b                                 | YLR264w     |             |
| CA4885 | IPF1636    | 1.3  | 1.4 | 1.9 | 1.6 | similar to Saccharomyces cerevisiae Tpo1p multidrug re                               | YLL028w     | orf19.6577  |
| CA0425 | PPH21      | 1.2  | 1.3 | 1.7 | 1.6 | protein ser/thr phosphatase PP2A-1 (by homology)                                     | YDL188c     | orf19.9252  |
| CA3607 | RTA2       | 1.0  | 1.4 | 2.0 | 1.5 | Unknown function                                                                     | YOR049c     | orf19.24    |
| CA2246 | IPF7405    | 1.4  | 1.4 | 2.2 | 1.5 | unknown function                                                                     |             | orf19.4666  |
| CA4534 | RPS26A     | 1.7  | 1.3 | 1.3 | 1.5 | ribosomal protein S26.e.A, cytosolic (by homology)                                   | YGL189c     | orf19.1470  |
| CA4044 | GAL7       | -1.1 | 2.3 | 2.4 | 1.5 | UDP-glucose-hexose-1-phosphate uridylyltransferase (t                                | YBR018c     | orf19.3675  |
| CA3527 | IPF9934    | 1.2  | 1.6 | 2.4 | 1.5 | unknown function                                                                     | YGR149w     | orf19.8603  |
| CA1956 | ERG3       | 1.4  | 1.4 | 1.6 | 1.5 | C5,6 desaturase                                                                      | YLR056w     | orf19.767   |
| CA2805 | RNR1       | 1.1  | 1.6 | 2.0 | 1.5 | ribonucleoside-diphosphate reductase (by homology)                                   | YER070w     | orf19.5779  |
| CA3239 | IPF10558   | 1.5  | 1.2 | 1.4 | 1.5 | unknown function                                                                     |             |             |
| CA1230 | SSA4       | -1.1 | 1.5 | 1.6 | 1.5 | cahsp70 mRNA for heat shock                                                          | YER103w     | orf19.4980  |
| CA2335 | LYS21      | 1.0  | 1.7 | 2.0 | 1.5 | homocitrate synthase (by homology)                                                   |             | orf19.11982 |
| CA4749 | IPF4481    | 1.2  | 1.4 | 1.8 | 1.5 | unknown function                                                                     |             | orf19.4831  |
| CA5257 | SNC2.EXON2 | 1.2  | 1.5 | 1.8 | 1.5 | Strong similarity to synaptobrevin, exon 2 (by homology                              | YOR327c     |             |
| CA6092 | RPL35.3    | 1.6  | 1.2 | 1.7 | 1.5 | Ribosomal protein L35A, 3-prime end (by homology)                                    | YDL191w     |             |
| CA5551 | IPF5972    | 1.1  | 1.8 | 2.0 | 1.5 | putative cysteine dioxygenase (by homology)                                          |             | orf19.7314  |
| CA0274 | IPF15153   | 1.4  | 1.3 | 2.0 | 1.5 | unknown function                                                                     |             | orf19.13289 |
| CA0958 | SEC24      | 1.0  | 1.6 | 1.5 | 1.5 | component of COPII coat of ER-Golgi vesicles(by homo                                 | YIL109c     | orf19.12194 |
| CA4084 | TPS1       | -1.0 | 1.5 | 2.1 | 1.5 | TREHALOSE-6-PHOSPHATE SYNTHASE                                                       | YBR126c     | orf19.6640  |
| CA2134 | COX8       | 1.5  | 1.3 | 1.4 | 1.5 | CYTOCHROME C OXIDASE (by homology)                                                   | YLR395c     | orf19.5213  |
| CA2932 | NHX1       | 1.2  | 1.5 | 1.5 | 1.5 | NA+-H+ antiporter                                                                    | YDR456w     | orf19.11677 |
| CA2076 | ERO1       | -1.0 | 1.6 | 2.1 | 1.5 | Required for protein disulfide bond formation in the ER                              | YML130c     | orf19.4871  |
| CA2082 | NTF2       | 1.8  | 1.3 | 1.7 | 1.5 | nuclear transport factor (by homology)                                               | YER009w     |             |
| CA5749 | IPF2908    | -1.4 | 1.3 | 1.2 | 1.5 | unknown function                                                                     | YBR238c     | orf19.7459  |
| CA0982 | IPF7397    | 1.1  | 1.6 | 2.0 | 1.5 | unknown function                                                                     | YGR141w     | orf19.1800  |
| CA2393 | RHO3       | 1.3  | 1.4 | 1.7 | 1.5 | GTP-binding protein of the rho family                                                | YIL118w     | orf19.11018 |
| CA1102 | AKR1       | 1.1  | 1.3 | 1.6 | 1.5 | ankyrin repeat-containing protein by homology                                        | YDR264c     | orf19.4950  |
| CA3686 | IPF4890    | 1.4  | 1.4 | 2.2 | 1.5 | unknown function                                                                     | YOL119c     | orf19.13642 |
| CA3382 | HTA3       | 1.2  | 1.2 | 1.4 | 1.5 | histone H2A F/Z variant (by homology)                                                | YOL012c     | orf19.327   |
| CA0863 | ITR2       | 1.1  | 1.3 | 2.3 | 1.5 | Myo-inositol transporter (by homology)                                               | YOL103w     | orf19.3526  |
| CA2696 | IPF9169    | 1.0  | 1.3 | 1.9 | 1.5 | similar to Saccharomyces cerevisiae Bur6p functional h                               | YER159c     | orf19.2736  |
| CA4986 | SER33      | -1.1 | 1.6 | 1.8 | 1.5 | Phosphoglycerate dehydrogenase (by homology)                                         | YIL074c     | orf19.5263  |
| CA1373 | AGP1       | 1.4  | 1.7 | 1.2 | 1.5 | asparagine and glutamine permease (by homology)                                      | YDR508c     | orf19.8784  |
| CA2024 | IPF9616    | 1.2  | 1.5 | 1.5 | 1.5 | unknown function                                                                     |             | orf19.4910  |
| CA4822 | DFG5       | 1.1  | 1.4 | 1.9 | 1.5 | Required for filamentous growth (by homology)                                        | YMR238w     | orf19.2075  |
| CA3874 | ENO1       | 1.6  | 1.6 | 1.2 | 1.5 | Enolase I (2-phosphoglycerate dehydratase)                                           | YGR254w     | orf19.395   |
| CA5750 | CHS21      | 1.0  | 1.1 | 1.6 | 1.5 | Chitin synthase (by homology)                                                        |             | orf19.5384  |
| CA0117 | IPF19231   | 1.2  | 1.1 | 1.4 | 1.5 | unknown function                                                                     | YNL305c     | orf19.916   |



|        |              |      |      |     |     |                                                                     |         |             |
|--------|--------------|------|------|-----|-----|---------------------------------------------------------------------|---------|-------------|
| CA2280 | DUR1,2       | -1.0 | 1.2  | 1.2 | 1.5 | urea amidolyase (by homology)                                       | YBR208c | orf19.780   |
| CA0086 | IPF16598     | -1.0 | 1.4  | 1.3 | 1.5 | unknown function                                                    | YBR042c | orf19.7781  |
| CA1470 | IPF17942     | 1.1  | 1.6  | 1.5 | 1.5 | unknown function                                                    | YKL189w | orf19.8415  |
| CA4823 | ERC3         | 1.1  | 1.6  | 2.4 | 1.5 | ethionine resistance protein (by homology)                          | YDR338c | orf19.2073  |
| CA0892 | PHO8.5       | -1.1 | 1.3  | 1.6 | 1.5 | repressible alkaline phosphatase, 5-prime end (by homology)         | YDR481c | orf19.4736  |
| CA4739 | IPF4498      | 1.4  | 1.2  | 2.1 | 1.5 | unknown function                                                    | YMR071c | orf19.4845  |
| CA0574 | IPF15183     | 1.3  | 1.3  | 1.7 | 1.5 | unknown function                                                    |         | orf19.9373  |
| CA4921 | IPF1416      | 1.0  | 1.5  | 1.8 | 1.5 | unknown function                                                    | YPL103c | orf19.6061  |
| CA4416 | IPF11888     | 1.1  | 1.4  | 1.8 | 1.5 | unknown function                                                    | YBL064c | orf19.5180  |
| CA2861 | HHT21        | 1.4  | 1.4  | 1.5 | 1.5 | Histone H3                                                          | YNL031c | orf19.1061  |
| CA0692 | PGM2         | -1.2 | 1.3  | 1.5 | 1.5 | Phosphoglucosyltransferase (by homology)                            | YMR105c | orf19.10359 |
| CA1720 | IPF15581     | 1.3  | 1.6  | 1.7 | 1.5 | unknown function                                                    |         | orf19.12120 |
| CA0697 | VTC4         | -1.0 | 1.4  | 1.9 | 1.5 | putative polyphosphate synthetase (by homology)                     | YJL012c | orf19.3363  |
| CA2659 | NDH2         | 1.0  | 1.3  | 1.4 | 1.5 | NADH dehydrogenase (by homology)                                    |         | orf19.5713  |
| CA1789 | GAR1         | 1.3  | 1.5  | 1.4 | 1.5 | Nucleolar rRNA processing protein (by homology)                     | YHR089c | orf19.1164  |
| CA0526 | BUB3         | 1.0  | 1.3  | 2.0 | 1.5 | cell cycle arrest protein (by homology)                             | YOR026w | orf19.2655  |
| CA4265 | GAP6         | 1.0  | 1.4  | 1.8 | 1.5 | General amino acid permease (by homology)                           |         | orf19.6659  |
| CA1874 | TPK2         | 1.1  | 1.5  | 1.7 | 1.5 | cAMP-dependent protein kinase 2 (by homology)                       | YPL203w | orf19.2277  |
| CA4873 | IPF1674.3    | 1.0  | 1.4  | 1.4 | 1.5 | putative transcription initiation factor, 3-prime end (by homology) |         |             |
| CA0471 | ECM22        | 1.1  | 1.6  | 2.2 | 1.4 | putative protein involved in cell wall biogenesis (by homology)     |         | orf19.2623  |
| CA5546 | TUB1.3       | 1.3  | 1.4  | 1.9 | 1.4 | Alpha-1 tubulin, 3-prime end                                        | YML085c | orf19.7308  |
| CA2619 | IPF9490      | 1.0  | 1.3  | 1.7 | 1.4 | amino acid permease (by homology)                                   |         | orf19.2810  |
| CA5920 | RPS12        | 1.4  | 1.1  | 1.3 | 1.4 | acidic ribosomal protein S12 (by homology)                          | YOR369c | orf19.6785  |
| CA1386 | THR1         | 1.1  | 1.5  | 1.5 | 1.4 | homoserine kinase                                                   | YHR025w | orf19.923   |
| CA2937 | RPS21B.3     | 1.9  | 1.3  | 1.4 | 1.4 | ribosomal protein S21, 3-prime end                                  | YJL136c |             |
| CA5353 | IML2         | -1.1 | 1.7  | 1.7 | 1.4 | unknown function                                                    | YKR018c | orf19.7229  |
| CA0622 | IPF14171     | 1.2  | 1.1  | 1.2 | 1.4 | unknown function                                                    | YGR086c | orf19.3149  |
| CA5691 | DED1         | 1.3  | 1.6  | 1.9 | 1.4 | RNA helicase (by homology)                                          | YOR204w | orf19.7392  |
| CA0038 | CYC1         | 1.2  | 1.2  | 1.3 | 1.4 | cytochrome-c isoform 1                                              | YJR048w | orf19.1770  |
| CA4227 | SCH9         | 1.2  | 1.4  | 1.9 | 1.4 | strong similarity to S.pombe sck1 protein kinase                    | YHR205w | orf19.829   |
| CA1304 | RPS13.3      | 1.5  | 1.3  | 1.3 | 1.4 | ribosomal protein, 3-prime end (by homology)                        | YDR064w |             |
| CA2186 | IPF6881      | -1.2 | 1.3  | 1.1 | 1.4 | putative phosphatidyl synthase                                      |         | orf19.4246  |
| CA0367 | TIM22        | -1.1 | 1.5  | 1.7 | 1.4 | Mitochondrial import inner membrane translocase subunit             | YDL217c | orf19.1352  |
| CA2758 | GLC3         | -1.2 | -1.0 | 1.2 | 1.4 | 1,4-glucan branching enzyme (by homology)                           | YEL011w | orf19.13067 |
| CA2862 | HHF21        | 1.2  | 1.2  | 1.2 | 1.4 | histone H4                                                          | YNL030w | orf19.1059  |
| CA4791 | IPF3370      | 1.4  | 1.4  | 1.4 | 1.4 | similar to Saccharomyces cerevisiae Pre1p 20S protease              | YER012w | orf19.4025  |
| CA0056 | IPF15839     | 1.6  | 1.4  | 1.7 | 1.4 | unknown function                                                    |         | orf19.556   |
| CA1508 | IPF9977      | 1.4  | 1.3  | 2.0 | 1.4 | unknown function                                                    | YLR064w | orf19.4525  |
| CA4755 | IPF11480     | 1.1  | 1.3  | 1.8 | 1.4 | unknown function                                                    |         | orf19.4824  |
| CA0722 | ERK1         | -1.0 | 1.2  | 1.5 | 1.4 | mitogen-activated protein kinase (FUS3 homolog)                     | YGR040w | orf19.10404 |
| CA5178 | POL30        | -1.0 | 1.3  | 1.6 | 1.4 | Proliferating Cell Nuclear Antigen (by homology)                    | YBR088c | orf19.4616  |
| CA4179 | TOM20        | 1.2  | 1.1  | 1.5 | 1.4 | mitochondrial outer membrane import receptor                        | YGR082w | orf19.2953  |
| CA5206 | GPH1         | 1.0  | -1.0 | 1.3 | 1.4 | Glycogen phosphorylase (by homology)                                | YPR160w | orf19.7021  |
| CA3828 | SNQ2         | -1.0 | 1.8  | 2.0 | 1.4 | multidrug resistance protein (by homology)                          | YDR011w | orf19.5759  |
| CA3689 | RPS22A       | 1.9  | 1.2  | 1.2 | 1.4 | ribosomal protein S15a.e.c10 (by homology)                          | YJL190c | orf19.6265  |
| CA1914 | IPF16564     | 1.4  | 1.4  | 1.3 | 1.4 | putative mitochondrial ribosomal protein S12                        | YNR036c | orf19.2438  |
| CA0688 | PF10555.3EOC | -1.3 | 1.3  | 1.2 | 1.4 | unknown function, 3-prime end                                       |         | orf19.12155 |
| CA4484 | HEM15        | -1.1 | 1.4  | 1.4 | 1.4 | ferrochelatase precursor (by homology)                              | YOR176w | orf19.1880  |
| CA5352 | IPF856       | 1.1  | 1.3  | 1.8 | 1.4 | unknown function                                                    | YKR030w | orf19.7228  |

|        |             |      |      |      |     |                                                                |         |             |
|--------|-------------|------|------|------|-----|----------------------------------------------------------------|---------|-------------|
| CA2490 | MUM2        | -1.0 | 1.4  | 1.8  | 1.4 | ubiquitin C-terminal hydrolase (by homology)                   | YBR057c | orf19.4044  |
| CA5082 | SUA70       | -1.2 | 1.4  | 1.6  | 1.4 | TFIIB subunit (transcription initiation factor E)(by homology) | YPR086w | orf19.3059  |
| CA5766 | IPF1097     | -1.3 | 1.4  | 1.4  | 1.4 | serine/threonine protein kinase (by homology)                  | YOR267c | orf19.5408  |
| CA0156 | SCW1        | 1.5  | 1.3  | 1.3  | 1.4 | glucanase (by homology)                                        | YGR279c | orf19.9345  |
| CA1288 | KSP1        | 1.2  | 1.3  | 1.6  | 1.4 | SERINE/THREONINE-PROTEIN KINASE by homology                    | YHR082c | orf19.4432  |
| CA6154 | IPF1848     | 1.5  | 1.2  | 1.7  | 1.4 | similar to <i>Saccharomyces cerevisiae</i> Snu13p U4/U6.U5     | YEL026w | orf19.5885  |
| CA5704 | CHA11       | 1.0  | 1.4  | 1.6  | 1.4 | L-serine/L-threonine deaminase (by homology)                   | YCL064c | orf19.7404  |
| CA1188 | RPL30.3     | 1.9  | 1.3  | 1.4  | 1.4 | RNA binding, 3-prime end (by homology)                         | YGL030w |             |
| CA4854 | RCE1        | 1.2  | 1.3  | 1.7  | 1.4 | CAAX PRENYL PROTEASE 2 (by homology)                           | YMR274c | orf19.3825  |
| CA5435 | UFD4        | -1.1 | 1.3  | 1.3  | 1.4 | ubiquitin fusion degradation protein (by homology)             | YKL010c | orf19.3237  |
| CA0553 | IPF16653    | 1.0  | 1.3  | 1.5  | 1.4 | unknown function                                               | YKR088c | orf19.5534  |
| CA0828 | IPF17186    | 1.3  | 1.2  | 1.1  | 1.4 | unknown function                                               | YDR533c | orf19.7882  |
| CA1104 | IPF18761    | 1.2  | 1.3  | 1.6  | 1.4 | unknown function                                               | YPR098c |             |
| CA2738 | STF2        | 1.1  | 1.2  | 1.3  | 1.4 | ATP synthase regulatory factor (by homology)                   | YLR327c |             |
| CA4148 | IDH2        | -1.0 | 1.4  | 1.4  | 1.4 | Isocitrate dehydrogenase (NAD+) subunit 2, mitochondr          | YOR136w | orf19.13213 |
| CA2648 | IPF9062     | -1.2 | 1.5  | 1.3  | 1.4 | unknown function                                               | YOR032c | orf19.1187  |
| CA2644 | GRP2        | -1.0 | 1.4  | 1.6  | 1.4 | Reductase (by homology)                                        |         | orf19.4309  |
| CA1504 | ARF3        | 1.2  | 1.3  | 1.5  | 1.4 | GTP-binding protein of the ARF family (by homology)            |         | orf19.1702  |
| CA2344 | SFT2        | 1.2  | 1.2  | 1.7  | 1.4 | similar to <i>Saccharomyces cerevisiae</i> Sft2p suppressor c  | YBL102w | orf19.2342  |
| CA4124 | IPF20008    | 1.1  | 1.3  | 1.3  | 1.4 | unknown function                                               |         | orf19.2767  |
| CA2579 | RPL34B.3    | 1.8  | 1.3  | 1.2  | 1.4 | Ribosomal protein L34.e, 3-prime end (by homology)             | YIL052c |             |
| CA4266 | IPF2283     | -1.1 | 1.3  | 1.3  | 1.4 | unknown function                                               | YHR131c | orf19.6660  |
| CA6011 | CTM1        | -1.0 | 1.4  | 2.0  | 1.4 | cytochrome c methyltransferase (by homology)                   | YHR109w | orf19.7612  |
| CA2023 | RPL42.3     | 1.9  | 1.1  | 1.1  | 1.4 | ribosomal protein L36a, 3-prime end (by homology)              | YNL162w |             |
| CA5046 | YCK2        | 1.2  | 1.2  | 1.5  | 1.4 | casein kinase I (by homology)                                  | YNL154c | orf19.7001  |
| CA2311 | SSO2        | 1.3  | 1.2  | 1.5  | 1.4 | syntaxin (by homology)                                         | YMR183c | orf19.1376  |
| CA0323 | CDC95       | 1.1  | 1.6  | 1.6  | 1.4 | translation initiation factor 6 (eIF6) (by homology)           | YPR016c | orf19.9378  |
| CA5543 | IPF5988     | 1.3  | 1.2  | 1.8  | 1.4 | unknown function                                               |         | orf19.7305  |
| CA2534 | IPF12793    | 1.1  | 1.2  | 1.5  | 1.4 | similar to <i>Saccharomyces cerevisiae</i> Gis2p containing s  | YNL255c | orf19.3182  |
| CA5170 | PDC12.EXON2 | 1.0  | 1.3  | 1.7  | 1.4 | Pyruvate decarboxylase I, exon 2 (by homology)                 |         | orf19.4608  |
| CA0586 | IPF13493    | 1.3  | 1.2  | 1.3  | 1.4 | Unknown function                                               |         | orf19.12529 |
| CA3293 | IPF5726     | 1.2  | 1.3  | 1.3  | 1.4 | unknown function                                               |         | orf19.6327  |
| CA4866 | IPF4083     | -1.1 | -1.0 | -1.2 | 1.4 | similar to <i>Saccharomyces cerevisiae</i> Sec66p ER protein   | YBR171w | orf19.3843  |
| CA2314 | IPF14545    | 1.0  | 1.3  | 1.4  | 1.4 | unknown function                                               | YCL034w | orf19.1381  |
| CA1767 | SIT4        | 1.1  | 1.3  | 1.6  | 1.4 | Ser/thr protein phosphatase                                    | YDL047w | orf19.5200  |
| CA0081 | IPF11379    | 1.0  | 1.3  | 1.4  | 1.4 | unknown function                                               |         | orf19.633   |
| CA2834 | IPF12093    | 1.1  | 1.3  | 1.6  | 1.4 | unknown function                                               |         | orf19.4786  |
| CA3318 | WBP1        | -1.1 | 1.1  | 1.2  | 1.4 | Oligosaccharyl transferase beta subunit (by homology)          | YEL002c | orf19.2298  |
| CA0684 | IPF4450     | 1.1  | 1.5  | 1.7  | 1.4 | unknown function                                               |         | orf19.12173 |
| CA3197 | SEC61       | -1.2 | 1.4  | 1.4  | 1.4 | ER protein-translocation complex subunit                       | YLR378c | orf19.6176  |
| CA0752 | MNN2        | -1.1 | 2.0  | 2.5  | 1.4 | Golgi alpha-1,2-mannosyltransferase (by homology)              |         | orf19.11284 |
| CA2454 | RPL23B.3    | 1.4  | -1.0 | 1.1  | 1.4 | ribosomal protein L23.e, 3-prime end (by homology)             | YER117w | orf19.3504  |
| CA2391 | ADH5        | -1.1 | 1.3  | 1.6  | 1.4 | probable alcohol dehydrogenase (by homology)                   |         | orf19.2608  |
| CA4088 | HMO1        | -1.2 | 1.1  | 1.2  | 1.4 | High-mobility protein 1 by homology                            | YDR174w | orf19.6645  |
| CA4587 | IPF2223     | -1.3 | 1.5  | 1.4  | 1.4 | unknown function                                               | YNL011c | orf19.6905  |
| CA2612 | GAA1        | 1.1  | 1.2  | 1.4  | 1.4 | required for attachment of GPI anchor onto proteins by         | YLR088w | orf19.5693  |
| CA4476 | 01-Apr      | 1.1  | 1.3  | 1.6  | 1.4 | aspartyl protease                                              | YPL154c | orf19.1891  |
| CA5083 | IPF9278     | 1.1  | 1.2  | 1.6  | 1.4 | similar to <i>Saccharomyces cerevisiae</i> Swp1p oligosacch    | YMR149w | orf19.3060  |
| CA0122 | SNF4        | -1.0 | 1.3  | 1.3  | 1.4 | Nuclear regulatory protein (by homology).                      | YGL115w | orf19.13191 |



|        |          |      |     |     |     |                                                                       |                            |             |
|--------|----------|------|-----|-----|-----|-----------------------------------------------------------------------|----------------------------|-------------|
| CA3759 | IPF13139 | 1.0  | 1.0 | 1.1 | 1.4 | unknown function                                                      |                            | orf19.2910  |
| CA5941 | IPF3486  | 1.2  | 1.3 | 1.9 | 1.4 | unknown function                                                      | YGL198w                    | orf19.6756  |
| CA3688 | YIP3.3   | 1.3  | 1.2 | 1.6 | 1.3 | protein of unknown function, 3-prime end (by homology)                | YNL044w                    |             |
| CA1260 | IPF3170  | 1.2  | 1.6 | 1.6 | 1.3 | unknown function                                                      | YDR141c                    | orf19.3166  |
| CA5003 | MCD4     | 1.3  | 1.3 | 1.6 | 1.3 | Sporulation protein (by homology)                                     | YKL165c                    | orf19.5244  |
| CA0559 | GPX1     | 1.0  | 1.5 | 1.6 | 1.3 | glutathione peroxidase (by homology)                                  | YIR037w                    | orf19.86    |
| CA0116 | IPF17975 | -1.1 | 1.1 | 1.1 | 1.3 | unknown function                                                      |                            | orf19.915   |
| CA0489 | IPF6960  | 1.2  | 1.3 | 1.8 | 1.3 | unknown function                                                      |                            | orf19.2636  |
| CA4420 | SSM4     | 1.1  | 1.2 | 1.3 | 1.3 | involved in mRNA turnover by homology                                 | YIL030c                    | orf19.5175  |
| CA1298 | RPL32    | 1.5  | 1.2 | 1.2 | 1.3 | ribosomal protein L32                                                 | YBL092w                    |             |
| CA5705 | IPF2645  | 1.0  | 1.3 | 1.5 | 1.3 | unknown function                                                      |                            | orf19.7405  |
| CA2833 | PTC1     | 1.0  | 1.5 | 1.9 | 1.3 | protein serine/threonine phosphatase 2c (by homology)                 | YDL006w                    | orf19.4785  |
| CA1098 | IPF12316 | -1.2 | 1.4 | 1.4 | 1.3 | unknown function                                                      |                            |             |
| CA5037 | PRE3     | 1.0  | 1.3 | 1.5 | 1.3 | 20S proteasome subunit (beta1)(by homology)                           | YJL001w                    | orf19.6991  |
| CA4603 | IPF6230  | 1.6  | 1.1 | 1.6 | 1.3 | unknown function                                                      | YDL015c                    | orf19.10803 |
| CA0112 | IPF17358 | -1.0 | 1.2 | 1.5 | 1.3 | unknown function                                                      | YLR023c                    | orf19.5754  |
| CA3741 | MRS4     | 1.1  | 1.2 | 1.3 | 1.3 | RNA splicing protein and member of the mitochondrial c                | YKR052c                    | orf19.2178  |
| CA0883 | SUN41    | 1.4  | 1.3 | 1.5 | 1.3 | Putative cell wall beta-glucosidase (by homology)                     | YIL123w                    | orf19.3642  |
| CA0188 | IPF15442 | 1.1  | 1.4 | 1.7 | 1.3 | unknown function                                                      | YJL171c                    | orf19.9467  |
| CA2939 | TIF1     | 1.2  | 1.2 | 1.4 | 1.3 | translation initiation factor                                         | YKR059w                    | orf19.3324  |
| CA4765 | ADH1     | 1.6  | 1.7 | 1.2 | 1.3 | alcohol dehydrogenase (by homology)                                   |                            | orf19.3997  |
| CA4391 | ARR3     | 1.0  | 1.3 | 1.5 | 1.3 | involved in arsenite transport (by homology)                          | YPR201w                    | orf19.3122  |
| CA5537 | CHS2     | 1.2  | 1.2 | 1.6 | 1.3 | Chitin synthase                                                       | YNL192w                    | orf19.7298  |
| CA0349 | IPF19026 | 1.2  | 1.3 | 1.5 | 1.3 | unknown function                                                      | YAL053w ; Missing in array | orf19.1813  |
| CA5409 | COF1     | 1.2  | 1.2 | 1.3 | 1.3 | cofilin (by homology)                                                 | YLL050c                    |             |
| CA1285 | SKP1     | 1.4  | 1.1 | 1.1 | 1.3 | kinetochore protein complex CBF3 by homology                          | YDR328c                    | orf19.11905 |
| CA1216 | EBP1     | 1.0  | 1.4 | 2.1 | 1.3 | NADPH dehydrogenase                                                   |                            | orf19.7772  |
| CA1022 | IPF4820  | 1.0  | 1.3 | 2.0 | 1.3 | putativecomplex I intermediate associated protein CIA30 (by homology) |                            | orf19.10861 |
| CA4936 | IPF8369  | 1.2  | 1.2 | 1.8 | 1.3 | unknown function                                                      | YOR161c                    | orf19.13498 |
| CA2001 | IPF17074 | -1.0 | 1.3 | 1.4 | 1.3 | unknown function                                                      | YBR086c                    | orf19.2792  |
| CA4425 | ENA21.3  | -1.1 | 1.2 | 1.1 | 1.3 | P-type ATPase, 3-prime end (by homology)                              |                            | orf19.5170  |
| CA4863 | IPF4089  | -1.1 | 1.2 | 1.1 | 1.3 | secretory aspartyl proteinase                                         |                            | orf19.3839  |
| CA5407 | IPF1548  | -1.1 | 1.5 | 1.6 | 1.3 | unknown function                                                      |                            | orf19.951   |
| CA5492 | GCN1.3F  | 1.2  | 1.2 | 1.5 | 1.3 | translational activator, 3-prime end (by homology)                    |                            | orf19.5328  |
| CA1898 | IPF11998 | -1.0 | 1.5 | 1.2 | 1.3 | unknown function                                                      |                            | orf19.10273 |
| CA4610 | IPF19802 | 1.1  | 1.3 | 1.4 | 1.3 | similar to Saccharomyces cerevisiae Met30p involved in                | YIL046w                    | orf19.3301  |
| CA5666 | PUB1     | 1.3  | 1.3 | 1.4 | 1.3 | Major polyadenylated RNA-binding protein (by homolog                  | YNL016w                    | orf19.7368  |
| CA5550 | SSU1     | 1.1  | 1.4 | 1.8 | 1.3 | Sulfite sensitivity protein (by homology)                             | YPL092w                    | orf19.7313  |
| CA1977 | RPL25.3  | 1.6  | 1.2 | 1.2 | 1.3 | ribosomal protein L23a, 3-prime end (by homology)                     | YOL127w                    |             |
| CA2151 | ERC2     | 1.1  | 1.2 | 1.5 | 1.3 | ethionine resistance protein (by homology)                            |                            | orf19.6023  |
| CA5313 | IPF2163  | 1.2  | 1.4 | 1.8 | 1.3 | unknown function                                                      |                            | orf19.7184  |
| CA2198 | PMM1     | 1.2  | 1.5 | 1.4 | 1.3 | phosphomannomutase                                                    | YFL045c                    | orf19.2937  |
| CA4217 | IPF5809  | -1.1 | 1.3 | 1.3 | 1.3 | unknown function                                                      |                            | orf19.816   |
| CA6033 | COQ2     | 1.2  | 1.2 | 1.6 | 1.3 | para-hydroxybenzoate:polyprenyl transferase (by homo                  | YNR041c                    | orf19.7643  |
| CA2734 | RPL38    | 1.5  | 1.4 | 1.4 | 1.3 | ribosomal protein L38 (by homology)                                   | YLR325c                    |             |
| CA0306 | HEM3     | 1.3  | 1.2 | 1.5 | 1.3 | porphobilinogen deaminase                                             | YDL205c                    | orf19.1742  |
| CA4972 | MUP1     | 1.2  | 1.1 | 1.6 | 1.3 | High affinity methionine permease (by homology)                       | YGR055w                    | orf19.5280  |
| CA4263 | IPF2277  | 1.1  | 1.2 | 2.0 | 1.3 | unknown function                                                      |                            | orf19.6656  |
| CA2166 | FEN12    | 1.4  | 1.4 | 1.5 | 1.3 | Probable subunit of 1,3-beta-glucan synthase (by homology)            |                            | orf19.908   |

|        |              |      |      |     |     |                                                                                              |                  |             |
|--------|--------------|------|------|-----|-----|----------------------------------------------------------------------------------------------|------------------|-------------|
| CA5986 | INO1         | 1.0  | 1.5  | 2.1 | 1.3 | myo-inositol-1-phosphate synthase                                                            | YJL153c          | orf19.7585  |
| CA4125 | IPF20161     | -1.1 | 1.1  | 1.2 | 1.3 | unknown function                                                                             |                  | orf19.10281 |
| CA2583 | IPF9445      | -1.0 | 1.2  | 1.5 | 1.3 | unknown function                                                                             |                  | orf19.4372  |
| CA5914 | HHT3         | 1.1  | 1.2  | 1.4 | 1.3 | histone H3                                                                                   |                  | orf19.6791  |
| CA2562 | IPF19953     | 1.4  | 1.4  | 1.6 | 1.3 | unknown function                                                                             |                  | orf19.5642  |
| CA1094 | YIP1         | 1.2  | 1.2  | 1.4 | 1.3 | golgi membrane protein (by homology)                                                         | YGR172c          | orf19.3951  |
| CA2714 | IFF2         | 1.5  | 1.4  | 1.9 | 1.3 | unknown function                                                                             |                  | orf19.575   |
| CA5507 | TIF11        | 1.3  | 1.3  | 1.2 | 1.3 | translation initiation factor eIF1a (by homology)                                            | YMR260c          | orf19.5351  |
| CA0961 | IPF18822     | -1.0 | 1.2  | 1.4 | 1.3 | unknown function                                                                             |                  | orf19.3720  |
| CA3097 | IPF6600      | 1.1  | 1.4  | 1.4 | 1.3 | unknown function                                                                             | YBR159w          | orf19.3859  |
| CA3125 | IPF8921.5EOC | 1.1  | 1.2  | 1.8 | 1.3 | unknown function, 5-prime end                                                                |                  |             |
| CA4970 | IPF4696      | -1.1 | 1.7  | 1.4 | 1.3 | unknown Function                                                                             |                  | orf19.5282  |
| CA3879 | CDC42        | 1.1  | 1.3  | 1.5 | 1.3 | Cell Division Control                                                                        | YLR229c          | orf19.390   |
| CA2859 | IPF7056      | 1.1  | 1.3  | 1.9 | 1.3 | unknown function                                                                             | YBR004c          | orf19.1063  |
| CA0317 | SSD1         | 1.1  | 1.2  | 1.5 | 1.3 | Protein phosphatase (by homology)                                                            | YDR293c          | orf19.3959  |
| CA2117 | SNG3         | 1.3  | 1.2  | 1.5 | 1.3 | Drug transporter (by homology)                                                               |                  | orf19.1333  |
| CA5151 | IPF1009      | 1.2  | 1.4  | 1.6 | 1.3 | Weak similarity to <i>S. cerevisiae</i> RFX1                                                 | Missing in array | orf19.4590  |
| CA3676 | RBP1         | 1.4  | 1.1  | 1.4 | 1.3 | rapamycin-binding protein                                                                    | YNL135c          | orf19.6452  |
| CA3950 | PTM1         | 1.1  | 1.1  | 1.3 | 1.3 | Possibly involved in the TCA cycle (by homology)                                             | YKL039w          | orf19.9542  |
| CA2615 | CTA241.EXON  | 1.3  | 1.2  | 1.4 | 1.3 | transcriptional activator, exon 1                                                            |                  | orf19.5700  |
| CA1016 | IPF11142     | -1.0 | 1.1  | 1.3 | 1.3 | unknown function                                                                             | YOR273c          | orf19.473   |
| CA0370 | IPF13678     | 1.1  | 1.2  | 1.6 | 1.3 | unknown function                                                                             | YDR276c          |             |
| CA5143 | IPF1020      | 1.2  | 1.4  | 1.3 | 1.3 | Weak similarity to <i>N. crassa</i> hypothetical protein                                     | YJR012c          | orf19.4580  |
| CA3848 | IPF7940      | 1.1  | 1.1  | 1.7 | 1.3 | unknown function                                                                             |                  | orf19.6608  |
| CA0785 | IPF14603     | 1.1  | 1.2  | 1.3 | 1.3 | unknown function                                                                             | YJR100c          | orf19.11411 |
| CA5661 | KRE6         | 1.1  | 1.3  | 1.8 | 1.3 | Glucan synthase subunit                                                                      | YPR159w          | orf19.7363  |
| CA2564 | IPF12127     | -1.0 | 1.3  | 1.6 | 1.3 | unknown function                                                                             | YML066c          | orf19.5644  |
| CA4190 | IPF7530      | -1.0 | 1.2  | 1.6 | 1.3 | ATP-binding-cassette protein (by homology to <i>A.gambie</i>                                 | YOL075c          | orf19.12006 |
| CA4577 | MKK2         | -1.3 | 1.2  | 1.3 | 1.3 | Protein kinase of MEK (by homology)                                                          | YPL140c          | orf19.6889  |
| CA5707 | ERV25        | 1.1  | 1.4  | 1.3 | 1.3 | Component of COPII-coated vesicles (by homology)                                             | YML012w          | orf19.7409  |
| CA1679 | IPF5180.3EOC | 1.1  | 1.3  | 1.4 | 1.3 | unknown function, 3-prime end                                                                |                  |             |
| CA1476 | IPF10214     | 1.5  | 1.4  | 1.6 | 1.3 | unknown function                                                                             |                  | orf19.1093  |
| CA4669 | IPF4537      | 1.2  | 1.3  | 1.7 | 1.3 | putative permease (by homology)                                                              | YIL088c          | orf19.905   |
| CA3226 | RPS27        | 1.4  | -1.0 | 1.3 | 1.3 | ribosomal protein S27 (by homology)                                                          | YKL156w          |             |
| CA6131 | IPF4369      | -1.0 | 1.2  | 1.4 | 1.3 | similar to <i>Saccharomyces cerevisiae</i> Stp2p involved in pre-tRNA splicing (by homology) |                  | orf19.5917  |
| CA1536 | SOK1         | 1.1  | 1.1  | 1.4 | 1.3 | high copy suppressor of a cyclic AMP-dependent                                               | YDR006c          | orf19.451   |
| CA0740 | IPF3262.3    | 1.4  | 1.3  | 1.1 | 1.3 | unknown function, 3-prime end                                                                | YBR173c          |             |
| CA2339 | IPF13377     | 1.0  | 1.1  | 1.3 | 1.3 | unknown function                                                                             |                  | orf19.2350  |
| CA5949 | IPF3498      | 1.1  | 1.1  | 1.2 | 1.3 | unknown function                                                                             | YDR051c          | orf19.6747  |
| CA1896 | ERD2         | 1.1  | 1.3  | 1.4 | 1.3 | ER lumen protein retaining receptor (by homology)                                            | YBL040c          | orf19.2756  |
| CA4528 | STT3         | -1.2 | 1.2  | 1.4 | 1.3 | oligosaccharyl transferase (by homology)                                                     | YGL022w          | orf19.1478  |
| CA4700 | SAP9         | -1.0 | 1.6  | 2.2 | 1.3 | aspartyl proteinase 9 (by homology)                                                          | YLR120c          | orf19.6928  |
| CA3346 | IPF13356     | -1.1 | 1.3  | 1.4 | 1.3 | molybdopterin biosynthesis (by homology)                                                     | YHR111w          | orf19.2324  |
| CA1883 | IPF5479      | -1.0 | 1.2  | 1.4 | 1.3 | unknown function                                                                             | YOR088w          | orf19.2209  |
| CA5460 | IPF277       | 1.3  | 1.3  | 1.3 | 1.3 | human IgE-dependent histamine-releasing factor homol                                         | YKL056c          | orf19.3268  |
| CA0736 | RPL20B       | 1.3  | -1.1 | 1.2 | 1.3 | ribosomal protein (by homology)                                                              | YOR312c          | orf19.4632  |
| CA4021 | EBP2         | 1.1  | 1.4  | 1.4 | 1.3 | NADPH dehydrogenase (by homology)                                                            |                  | orf19.3442  |
| CA2597 | IFQ3         | -1.0 | 1.4  | 1.3 | 1.3 | unknown function                                                                             |                  | orf19.54    |
| CA5203 | RPS18        | 1.8  | 1.1  | 1.1 | 1.3 | Ribosomal protein S18 (by homology)                                                          | YML026c          | orf19.7018  |

|        |            |      |      |     |     |                                                                                        |                            |             |
|--------|------------|------|------|-----|-----|----------------------------------------------------------------------------------------|----------------------------|-------------|
| CA2521 | IPF4317    | 1.0  | 1.1  | 1.3 | 1.3 | unknown function                                                                       |                            | orf19.5518  |
| CA0581 | IPF3181    | 1.3  | 1.3  | 1.4 | 1.3 | similar to <i>Saccharomyces cerevisiae</i> Erp3p p24 protein                           | YDL018c                    | orf19.3558  |
| CA5536 | IPF2837    | 1.1  | 1.1  | 1.3 | 1.3 | putative cystathionine gamma-synthase (by homology)                                    | YHR112c                    | orf19.7297  |
| CA1905 | IPF7274    | 1.0  | 1.1  | 1.1 | 1.3 | unknown function                                                                       |                            | orf19.2783  |
| CA5016 | IPF7561    | -1.0 | 1.4  | 1.5 | 1.3 | unknown function                                                                       |                            | orf19.6968  |
| CA3385 | DRS23      | 1.0  | 1.3  | 1.3 | 1.3 | Membrane-spanning Ca-ATPase (by homology)                                              |                            | orf19.7955  |
| CA1637 | RPL43A.3   | 1.5  | 1.1  | 1.4 | 1.3 | ribosomal protein, 3-prime end (by homology)                                           | YPR043w                    |             |
| CA2211 | IPF13921   | 1.1  | 1.2  | 1.5 | 1.3 | Unknown function                                                                       |                            | orf19.4749  |
| CA2980 | GOG5       | 1.1  | 1.1  | 1.4 | 1.3 | GDP-mannose transporter (by homology)                                                  | YGL225w                    | orf19.1232  |
| CA4204 | HOL4       | 1.1  | 1.3  | 1.6 | 1.3 | member of major facilitator superfamily multidrug-resistance protein subfamily 1 (by h |                            | orf19.12021 |
| CA3870 | YPK1       | -1.1 | 1.3  | 1.5 | 1.3 | ser/thr-specific protein kinase (by homology)                                          | YMR104c                    | orf19.399   |
| CA0267 | IPF12262   | 1.0  | 1.1  | 1.1 | 1.3 | extracellular alpha-1,4-glucan (by homology)                                           |                            | orf19.9183  |
| CA5488 | IPF810     | 1.1  | 1.3  | 1.5 | 1.3 | unknown function                                                                       | YJL178c                    | orf19.5322  |
| CA0969 | IPF9132    | 1.4  | 1.5  | 1.6 | 1.3 | unknown function                                                                       | YPL184c                    | orf19.12987 |
| CA2803 | IPF11711   | -1.1 | 1.3  | 1.3 | 1.3 | ubiquitin-protein ligase (by homology)                                                 | YDR457w                    | orf19.5776  |
| CA0256 | IPF10309   | -1.2 | 1.2  | 1.1 | 1.3 | unknown function                                                                       | YKL206c                    | orf19.2278  |
| CA3579 | HSH49      | 1.0  | 1.2  | 1.2 | 1.3 | spliceosome-associated essential protein [ <i>Candida albic</i>                        | YOR319w                    | orf19.2261  |
| CA0066 | IPF15051   | 1.3  | 1.2  | 1.3 | 1.3 | unknown function                                                                       |                            | orf19.8843  |
| CA5013 | IPF13941   | 1.0  | 1.3  | 1.5 | 1.3 | Unknown function                                                                       |                            | orf19.5234  |
| CA4218 | ACP1       | 1.2  | -1.1 | 1.3 | 1.3 | mitochondrial acyl carrier protein (by homology)                                       | YKL192c                    | orf19.819   |
| CA5275 | IPF1760.3F | -1.1 | 1.1  | 1.4 | 1.3 | unknown function, 3-prime end                                                          |                            | orf19.12451 |
| CA3836 | IPF8179    | 1.2  | 1.3  | 1.4 | 1.3 | putative esterase (by homology)                                                        | YJL068c                    | orf19.6596  |
| CA5236 | LCB2       | 1.2  | 1.1  | 1.4 | 1.3 | Palmitoyl transferase (by homology)                                                    | YDR062w                    | orf19.5027  |
| CA1673 | PST2       | 1.1  | 1.3  | 1.4 | 1.3 | 1,4-benzoquinone reductase by homology                                                 | YDR032c                    | orf19.3612  |
| CA6097 | NCE102     | 1.3  | 1.3  | 1.5 | 1.3 | secretion of proteins that lack classical secretory signal                             | YPR149w                    | orf19.5960  |
| CA4617 | STB5       | 1.1  | 1.2  | 1.5 | 1.3 | SIN3 binding protein (by homology)                                                     | YHR178w                    | orf19.3308  |
| CA0899 | IPF4905    | 1.0  | 1.3  | 1.5 | 1.3 | unknown function                                                                       |                            | orf19.411   |
| CA4697 | HTB1       | 1.1  | 1.3  | 1.5 | 1.3 | Histone H2B (by homology)                                                              | YDR224c                    | orf19.6925  |
| 2566.2 |            | 1.0  | 1.3  | 1.6 | 1.3 |                                                                                        |                            |             |
| CA5919 | IPF8926.3  | 1.2  | 1.2  | 1.5 | 1.2 | unknown function, 3-prime end                                                          |                            | orf19.6786  |
| CA5811 | IPF2690.5F | 1.1  | 1.4  | 1.6 | 1.2 | unknown function, 5-prime end                                                          |                            | orf19.5469  |
| CA3267 | RPS620A    | 1.2  | 1.1  | 1.2 | 1.2 | unknown function                                                                       |                            | orf19.6300  |
| CA4477 | IPF6459    | -1.1 | 1.3  | 1.3 | 1.2 | unknown function                                                                       | YMR210w                    | orf19.1890  |
| CA5034 | OST1       | 1.1  | 1.3  | 1.4 | 1.2 | oligosaccharyltransferase                                                              | YJL002c                    | orf19.6988  |
| CA0881 | IPF16965   | -1.0 | 1.3  | 1.3 | 1.2 | unknown function                                                                       | YOR256c                    | orf19.8006  |
| CA2756 | IPF18418   | -1.1 | 1.0  | 1.1 | 1.2 | unknown function                                                                       | YHR029c                    | orf19.13065 |
| CA0362 | TEF1       | 1.6  | 1.5  | 1.1 | 1.2 | translation elongation factor eEF1 alpha-A chain                                       | YPR080w                    | orf19.9009  |
| CA4527 | IPF4398    | 1.2  | 1.3  | 1.5 | 1.2 | unknown function                                                                       | YGL023c                    | orf19.9054  |
| CA2473 | CBF1       | -1.2 | 1.4  | 1.2 | 1.2 | putative centromere binding factor 1                                                   | YJR060w                    | orf19.2876  |
| CA2903 | IPF11725   | 1.1  | 1.5  | 1.3 | 1.2 | unknown function                                                                       |                            | orf19.10979 |
| CA6070 | IPF4842    | 1.1  | 1.2  | 1.6 | 1.2 | similar to <i>Saccharomyces cerevisiae</i> Rsg1p ras-related                           | YCR027c                    | orf19.5994  |
| CA3341 | RPS17.3    | 1.3  | -1.0 | 1.2 | 1.2 | Ribosomal protein S17, 3-prime end (by homology)                                       | YDR447c                    |             |
| CA1737 | LYS12      | -1.1 | 1.2  | 1.5 | 1.2 | homo-isocitrate dehydrogenase (by homology)                                            | YIL094c                    | orf19.2525  |
| CA4105 | SMT3       | 1.3  | 1.1  | 1.1 | 1.2 | Ubiquitin-like protein (by homology)                                                   | YDR510w                    | orf19.670   |
| CA1635 | URA7       | -1.1 | 1.3  | 1.5 | 1.2 | CTP synthase 1 (by homology)                                                           | YBL039c                    | orf19.3941  |
| CA4525 | SEC22      | 1.0  | 1.2  | 1.3 | 1.2 | synaptobrevin-type protein transport protein (by homolo                                | YLR268w                    |             |
| CA4434 | MRPL49     | 1.5  | 1.1  | 1.4 | 1.2 | ribosomal protein mitochondrial                                                        | YJL096w                    | orf19.5161  |
| CA3613 | SPF1       | 1.0  | 1.1  | 1.2 | 1.2 | P-type ATPase                                                                          | YEL031w                    | orf19.30    |
| CA3658 | TGL1       | -1.1 | 1.3  | 1.5 | 1.2 | Triacylglycerol lipase (by homology)                                                   | YKL140w ; Missing in array | orf19.2050  |

|        |              |      |      |      |     |                                                                                          |         |             |
|--------|--------------|------|------|------|-----|------------------------------------------------------------------------------------------|---------|-------------|
| CA1204 | IPF14524     | -1.1 | 1.1  | 1.3  | 1.2 | unknown function                                                                         | YGL160w | orf19.8486  |
| CA5897 | IPF2384      | 1.0  | 1.3  | 1.4  | 1.2 | unknown function                                                                         | YKL128c | orf19.6809  |
| CA0558 | GPX2         | 1.1  | 1.7  | 2.2  | 1.2 | glutathione peroxidase (by homology)                                                     |         | orf19.85    |
| CA3669 | IPF19997     | 1.1  | 1.2  | 1.2  | 1.2 | by homology to <i>S. cerevisiae</i> : U6 snRNA associated protein                        |         |             |
| CA0403 | IPF15224     | -1.0 | 1.2  | 1.4  | 1.2 | unknown function                                                                         | YKL046c | orf19.1989  |
| CA3035 | VPS28        | 1.0  | 1.2  | 1.3  | 1.2 | involved in vacuolar traffic (by homology)                                               | YPL065w | orf19.212   |
| CA5333 | DOA4         | -1.1 | 1.4  | 1.5  | 1.2 | ubiquitin-specific isopeptidase (by homology)                                            | YDR069c | orf19.7207  |
| CA3230 | EMP24        | 1.3  | 1.3  | 1.3  | 1.2 | component of the COPII-coated vesicles (by homology)                                     | YGL200c | orf19.6293  |
| CA3411 | IPF9413      | 1.1  | 1.1  | 1.3  | 1.2 | unknown function                                                                         | YGL215w | orf19.13565 |
| CA4272 | CUE1         | 1.1  | 1.1  | 1.1  | 1.2 | Involved in ubiquitination and degradation at the ER sur                                 | YMR264w | orf19.6668  |
| CA5264 | IPF1798      | -1.3 | 1.3  | -1.1 | 1.2 | unknown function                                                                         |         | orf19.4998  |
| CA5025 | AMI3         | -1.1 | 1.2  | 1.3  | 1.2 | protein required for normal mitochondrial structure (by h                                | YOL060c | orf19.6979  |
| CA5076 | IPF15301     | 1.3  | -1.1 | 1.4  | 1.2 | unknown function                                                                         | YJR116w | orf19.3051  |
| CA2156 | IPF8535      | -1.0 | 1.2  | 1.5  | 1.2 | unknown function                                                                         |         | orf19.5302  |
| CA2645 | YNK1         | 1.4  | 1.0  | 1.1  | 1.2 | Nucleoside diphosphate kinase (by homology)                                              | YKL067w | orf19.4311  |
| CA1415 | DBP2.EXON2   | 1.1  | 1.4  | 1.7  | 1.2 | ATP-dependent RNA helicase of DEAD box family, exon 2 (by homology)                      |         | orf19.170   |
| CA5187 | TOA2         | 1.1  | 1.2  | 1.2  | 1.2 | TFIIA subunit 13.5 kD (by homology)                                                      | YKL058w | orf19.4625  |
| CA3987 | ECM3         | 1.2  | 1.2  | 1.6  | 1.2 | Involved in cell wall biogenesis and architecture (by hon                                | YOR092w | orf19.1563  |
| CA5067 | IPF3589      | 1.1  | 1.6  | 1.9  | 1.2 | putative alcohol acyl transferase (by homology)                                          | YBR177c | orf19.3040  |
| CA2537 | IPF20108     | 1.2  | 1.1  | 1.3  | 1.2 | similar to <i>Saccharomyces cerevisiae</i> Sft2p suppressor of SED5 thermosensitive muta |         | orf19.3184  |
| CA6002 | IPF661       | 1.1  | 1.3  | 1.2  | 1.2 | unknown function                                                                         | YDR214w | orf19.7602  |
| CA1880 | IPF13316     | 1.1  | 1.3  | 1.4  | 1.2 | unknown function                                                                         | YNL010w | orf19.2269  |
| CA1904 | GRX5         | 1.2  | -1.0 | 1.0  | 1.2 | Glutaredoxin                                                                             | YPL059w | orf19.10298 |
| CA1790 | IPF13971     | 1.1  | 1.2  | 1.6  | 1.2 | unknown function                                                                         | YNL042w | orf19.5204  |
| CA5317 | RPP1B        | 1.1  | 1.1  | 1.0  | 1.2 | Acidic ribosomal protein L44 (by homology)                                               |         | orf19.7188  |
| CA1222 | IPF14871     | 1.2  | 1.2  | 1.3  | 1.2 | unknown function                                                                         |         | orf19.4132  |
| CA2855 | GPM2         | 1.0  | 1.3  | 1.4  | 1.2 | phosphoglycerate mutase (by homology)                                                    |         | orf19.1067  |
| CA0913 | IPF14810     | 1.2  | 1.1  | 1.3  | 1.2 | unknown function                                                                         | YER044c | orf19.9566  |
| CA4621 | IPF5753      | -1.0 | 1.2  | 1.5  | 1.2 | unknown function                                                                         | YER080w | orf19.3312  |
| CA3428 | VPS21        | -1.0 | 1.2  | 1.3  | 1.2 | GTP-binding protein (by homology)                                                        |         | orf19.589   |
| CA1662 | RPL28.3F     | 1.3  | -1.0 | 1.1  | 1.2 | Ribosomal protein, 3-prime end (by homology)                                             | YGL103w |             |
| CA4618 | IPF5757      | -1.0 | 1.1  | 1.3  | 1.2 | unknown function                                                                         |         | orf19.3309  |
| CA4809 | IPF1162      | -1.0 | 1.3  | 1.3  | 1.2 | Cystathionine beta-lyase (by homology)                                                   | YGL184c | orf19.2092  |
| CA3657 | IPF7459      | -1.0 | 1.2  | 1.5  | 1.2 | unknown function                                                                         |         | orf19.2049  |
| CA5951 | IPF3500      | 1.1  | 1.2  | 1.3  | 1.2 | unknown function                                                                         | YMR262w | orf19.6744  |
| CA2955 | IPF15201     | -1.0 | 1.2  | 1.1  | 1.2 | Unknown function                                                                         |         | orf19.5857  |
| CA1764 | IPF7596      | 1.2  | 1.2  | 1.1  | 1.2 | similar to <i>Saccharomyces cerevisiae</i> Ess1p peptidyl-prc                            | YJR017c | orf19.5196  |
| CA2260 | OST2         | 1.1  | 1.1  | 1.4  | 1.2 | Oligosaccharyltransferase epsilon subunit                                                | YOR103c | orf19.1761  |
| CA1861 | RAD32        | 1.0  | 1.2  | 1.2  | 1.2 | DNA repair protein (by homology)                                                         | YDR419w | orf19.866   |
| CA0700 | SHR3         | 1.2  | 1.0  | 1.1  | 1.2 | endoplasmic reticulum membrane protein (by homolo                                        | YDL212w | orf19.3366  |
| CA1613 | IPF19735     | 1.2  | 1.1  | 1.3  | 1.2 | unknown function                                                                         |         | orf19.3215  |
| CA2631 | IPF14389     | 1.1  | 1.1  | 1.1  | 1.2 | ubiquinone oxidoreductase subunit NUIM (by homology)                                     |         | orf19.4758  |
| CA0109 | IPF13723     | 1.0  | 1.1  | 1.5  | 1.2 | unknown function                                                                         |         | orf19.7892  |
| CA5671 | CTA4         | 1.0  | 1.2  | 1.2  | 1.2 | Probable transcription factor                                                            | YAL051w | orf19.7374  |
| CA0898 | SSH1.3       | 1.1  | -1.1 | 1.3  | 1.2 | involved in co-translational pathway of protein transport,                               | YBR283c | orf19.412   |
| CA5890 | FCR1         | 1.1  | 1.3  | 1.5  | 1.2 | Zinc cluster transcription factor                                                        |         | orf19.6817  |
| CA2669 | PF17494.3EOC | 1.0  | 1.2  | 1.4  | 1.2 | unknown function, 3-prime end                                                            |         |             |
| CA5276 | IPF1759.53F  | -1.2 | -1.0 | 1.2  | 1.2 | unknown function, similar to endochitinases, internal fragment                           |         |             |
| CA4437 | IPF13867     | 1.2  | 1.4  | 1.4  | 1.2 | unknown function                                                                         |         | orf19.5158  |

|        |            |      |      |      |     |                                                                                 |                  |             |
|--------|------------|------|------|------|-----|---------------------------------------------------------------------------------|------------------|-------------|
| CA5793 | IPF4192    | -1.0 | 1.3  | 1.4  | 1.2 | unknown function                                                                |                  | orf19.5442  |
| CA4366 | SWI1       | 1.2  | 1.3  | 1.7  | 1.2 | Transcription regulation by homology                                            | YPL016w          | orf19.5657  |
| CA3917 | IPF3273    | 1.2  | 1.2  | 1.2  | 1.2 | similar to <i>Saccharomyces cerevisiae</i> Ret3p coatomer c                     | YPL010w          | orf19.4382  |
| CA2188 | SSU81      | 1.2  | 1.2  | 1.4  | 1.2 | protein involved in the HOG1 high-osmolarity signal trar                        | YER118c          | orf19.4772  |
| CA0161 | RMS1       | -1.0 | 1.2  | 1.4  | 1.2 | (putative) transcriptional regulator (by homology)                              | YDR257c          | orf19.10177 |
| CA4830 | ATP8.EXON2 | 1.5  | 1.1  | 1.3  | 1.2 | F1F0-ATPase complex, Atp8 subunit, exon 2 (by homol                             | YML081ca         |             |
| CA3018 | SAH1       | 1.4  | 1.1  | 1.2  | 1.2 | S-adenosyl-L-homocysteine hydrolase by homology                                 | YER043c          | orf19.3911  |
| CA5434 | IPF199     | 1.1  | -1.0 | -1.1 | 1.2 | F-actin capping protein alpha subunit (by homology)                             | YKL007w          | orf19.3235  |
| CA4799 | RPN5.5F    | 1.0  | 1.2  | 1.1  | 1.2 | subunit of the regulatory particle of the proteasome, 5-prime end (by homology) |                  | orf19.4034  |
| CA0386 | IPF4065    | 1.0  | 1.2  | 1.3  | 1.2 | unknown function                                                                | YHR087w          | orf19.1862  |
| CA3463 | ALG8       | 1.2  | 1.2  | 1.5  | 1.2 | glucosyltransferase (by homology)                                               | YOR067c          | orf19.1659  |
| CA2607 | MRPL38     | 1.3  | 1.3  | 1.3  | 1.2 | ribosomal protein of the large subunit(L14), mitochondri                        | YKL170w          | orf19.5684  |
| CA1484 | ARO4       | -1.1 | 1.2  | 1.3  | 1.2 | 3-dehydro-deoxyphosphoheptonate aldolase, tyrosine-ii                           | YBR249c          | orf19.4060  |
| CA5694 | IPF3311    | 1.0  | 1.2  | 1.1  | 1.2 | unknown function                                                                |                  | orf19.7396  |
| CA3553 | IFA16.5    | -1.0 | 1.2  | 1.1  | 1.2 | unknown function, 5-prime end                                                   |                  | orf19.3878  |
| CA0322 | RPS9B      | 1.4  | 1.1  | 1.1  | 1.2 | Ribosomal protein                                                               | YPL081w          | orf19.8459  |
| CA0701 | IPF10397   | 1.2  | 1.1  | 1.1  | 1.2 | unknown function                                                                | Missing in array |             |
| CA5904 | IPF5944    | 1.1  | 1.1  | 1.5  | 1.2 | Unknown function                                                                | YNL326c          | orf19.6802  |
| CA3565 | MSC2       | 1.2  | 1.2  | 1.3  | 1.2 | Probable membrane protein                                                       | YDR205w          | orf19.3132  |
| CA2124 | IPF10490   | 1.0  | 1.2  | 1.4  | 1.2 | unknown function                                                                |                  | orf19.8049  |
| CA5575 | IPF19813   | 1.3  | 1.2  | 1.3  | 1.2 | unknown function                                                                |                  | orf19.7342  |
| CA5307 | IPF2172    | -1.1 | 1.1  | 1.6  | 1.2 | similar to <i>Saccharomyces cerevisiae</i> Kap120 nuclear tr                    | YPL125w          | orf19.7177  |
| CA5918 | ERV14      | 1.3  | 1.2  | 1.5  | 1.2 | membrane protein                                                                | YGL054c          | orf19.6787  |
| CA2178 | IPF9282    | 1.1  | 1.3  | 1.5  | 1.2 | unknown function                                                                | YOL019w          | orf19.1510  |
| CA3014 | IPF11915   | 1.1  | 1.4  | 1.4  | 1.2 | similar to <i>Saccharomyces cerevisiae</i> Pcl7p cyclin like pr                 | YIL050w          | orf19.13605 |
| CA2854 | RPN4       | 1.0  | 1.3  | 1.4  | 1.2 | 26S proteasome subunit (by homology)                                            | YDL020c          | orf19.1069  |
| CA3168 | PRS3       | 1.1  | 1.2  | 1.4  | 1.2 | ribose-phosphate pyrophosphokinase                                              | YHL011c          | orf19.1575  |
| CA5349 | IPF861     | -1.2 | 1.1  | 1.2  | 1.2 | unknown function                                                                | YKR017c          | orf19.7224  |
| CA4405 | IPF8773    | -1.1 | 1.2  | 1.5  | 1.2 | putative cytochrome P450 (by homology)                                          |                  | orf19.3105  |
| CA2673 | IPF5849    | 1.3  | 1.2  | 1.6  | 1.2 | unknown function                                                                |                  | orf19.5496  |
| CA5413 | IPF1567    | 1.2  | 1.1  | 1.1  | 1.2 | mitochondrial ribosomal protein L34 (by homology)                               | YDR115w          |             |
| CA0123 | MXR1       | 1.0  | 1.2  | 1.2  | 1.2 | methionine sulfoxide reductase                                                  | YER042w          | orf19.9576  |
| CA1020 | IPF4824    | -1.1 | 1.3  | 1.3  | 1.2 | unknown function                                                                | YOR155c          | orf19.10863 |
| CA0010 | IPF16036   | 1.1  | 1.2  | 1.3  | 1.2 | similar to <i>Saccharomyces cerevisiae</i> Tim17p mitochond                     | YJL143w          | orf19.7790  |
| CA2752 | IPF6238    | -1.0 | 1.3  | 1.4  | 1.2 | GAG protein of retrotransposon pCal                                             |                  | orf19.2374  |
| CA0754 | IPF15880   | 1.3  | 1.3  | 1.3  | 1.2 | unknown function                                                                |                  | orf19.3486  |
| CA4466 | VPH1       | -1.1 | -1.0 | 1.3  | 1.2 | H+-ATPase V0 domain subunit (by homology)                                       | YOR270c          | orf19.6863  |
| CA3673 | IPF13667   | 1.2  | 1.2  | 1.4  | 1.2 | unknown function                                                                | YHR122w          | orf19.6455  |
| CA3309 | IPF8806    | -1.1 | 1.4  | 1.5  | 1.2 | 6-phosphofructose-2-kinase (by homology)                                        |                  | orf19.9844  |
| CA5891 | IPF2400    | -1.0 | 1.2  | 1.2  | 1.2 | putative aldehyde reductase (by homology)                                       | YJR096w          | orf19.6816  |
| CA1962 | IPF14285   | 1.1  | 1.4  | 1.3  | 1.2 | unknown function                                                                |                  | orf19.2398  |
| CA3984 | HOM2       | -1.3 | 1.3  | 1.3  | 1.2 | Aspartate-semialdehyde dehydrogenase (by homology)                              | YDR158w          | orf19.9132  |
| CA3867 | PHR2       | 1.1  | 1.1  | 1.4  | 1.2 | pH-regulated protein 2                                                          | YMR307w          | orf19.13500 |
| CA5503 | DSK2       | 1.0  | 1.3  | 1.2  | 1.2 | ubiquitin-like protein (by homology)                                            | YMR276w          | orf19.5345  |
| CA3880 | CAF16      | -1.0 | 1.2  | 1.2  | 1.2 | ABC ATPase (by homology)                                                        | YFL028c          | orf19.388   |
| CA3075 | IPF6105    | 1.1  | 1.2  | 1.6  | 1.2 | similar to <i>Saccharomyces cerevisiae</i> Gua1p GMP synth                      | YMR217w          | orf19.4813  |
| CA0005 | IPF14994   | -1.0 | 1.2  | 1.2  | 1.2 | unknown function                                                                | YJL066c          | orf19.2414  |
| CA3268 | RPS620B    | 1.1  | 1.1  | 1.2  | 1.2 | unknown function                                                                |                  | orf19.6301  |
| CA2115 | IPF8030    | 1.2  | 1.3  | 1.4  | 1.2 | unknown function                                                                | YBR272c          | orf19.8911  |



|        |              |      |      |      |     |                                                                |                  |             |
|--------|--------------|------|------|------|-----|----------------------------------------------------------------|------------------|-------------|
| CA0966 | IPF9136.5EOC | 1.0  | 1.2  | 1.3  | 1.2 | potassium transporter, 5-prime end (by homology)               |                  | orf19.6249  |
| CA2226 | BET3.EXON2   | 1.2  | 1.2  | 1.3  | 1.2 | targeting and fusion of ER to Golgi transport vesicles, e:     | YKR068c          | orf19.5817  |
| CA2866 | RHO1         | 1.2  | 1.1  | 1.4  | 1.2 | GTP-binding protein of the rho subfamily of ras-like prot      | YPR165w          | orf19.2843  |
| CA2565 | MET15        | 1.1  | 1.4  | 1.6  | 1.2 | O-acetylhomoserine O-acetylserine sulphydrylase                | YLR303w          | orf19.5645  |
| CA4890 | PRE10        | 1.1  | 1.1  | 1.0  | 1.2 | 20S proteasome subunit C1 (by homology)                        | YOR362c          | orf19.6582  |
| CA3277 | IPF6266      | 1.1  | 1.3  | 1.3  | 1.2 | unknown function                                               |                  | orf19.6311  |
| CA1907 | ATP7         | 1.2  | -1.1 | 1.1  | 1.2 | F1F0-ATPase complex, FO D subunit (by homology)                | YKL016c          | orf19.2785  |
| CA5112 | IPF1341      | -1.0 | 1.3  | 1.3  | 1.2 | Similarity to mucin proteins (by homology)                     |                  | orf19.6420  |
| CA3878 | IPF7289      | -1.2 | 1.1  | 1.2  | 1.2 | similar to <i>Saccharomyces cerevisiae</i> Upc2p RNA polym     | YDR213w          | orf19.391   |
| CA1802 | IPF11443     | -1.0 | 1.0  | -1.0 | 1.2 | unknown function                                               | YIR002c          | orf19.2919  |
| CA5077 | YPT1         | 1.3  | 1.2  | 1.2  | 1.2 | GTP-binding protein of the rab family (by homology)            | YFL038c          | orf19.3052  |
| CA4807 | PDR6         | -1.2 | 1.1  | 1.2  | 1.2 | Pleiotropic drug resistance regulatory protein (by homol       | YGL016w          | orf19.2094  |
| CA3737 | BLM3         | -1.2 | 1.4  | 1.1  | 1.2 | bleomycin resistance (by homology)                             | YFL007w          | orf19.2182  |
| CA1410 | GAT1         | -1.0 | 1.2  | 1.1  | 1.2 | nitrogen regulation (by homology)                              | YFL021w          | orf19.1275  |
| CA0687 | CPA2         | -1.0 | 1.2  | 1.3  | 1.2 | arginine-specific carbamoylphosphate (by homology)             | YJR109c          | orf19.3221  |
| CA6135 | CMK1         | 1.0  | 1.3  | 1.4  | 1.2 | Ca2+/calmodulin-dependent ser/thr protein kinase (by homology) |                  | orf19.5911  |
| CA2108 | RPL26A.3     | 1.1  | -1.1 | 1.2  | 1.2 | ribosomal protein, 3-prime end (by homology)                   | YLR344w          |             |
| CA3986 | IPF7141      | 1.1  | 1.3  | 1.2  | 1.2 | unknown function                                               |                  | orf19.1562  |
| CA0375 | CRH11        | 1.1  | 1.2  | 1.5  | 1.2 | Probable membrane protein (by homology)                        | YGR189c          | orf19.2706  |
| CA3353 | AUR1         | 1.3  | 1.2  | 1.6  | 1.2 | aureobasidin-resistance protein                                | YKL004w          | orf19.9500  |
| CA4191 | IPF7531      | -1.0 | 1.3  | 1.3  | 1.2 | unknown function                                               | YER156c          | orf19.12007 |
| CA4103 | IPF3980      | 1.1  | 1.4  | 1.2  | 1.2 | unknown function                                               | YLR183c          | orf19.668   |
| CA4362 | ATP2         | 2.1  | 1.4  | 1.2  | 1.2 | F1F0-ATPase complex, F1 beta subunit (by homology)             | YJR121w          | orf19.5653  |
| CA2315 | YEA4         | 1.0  | 1.2  | 1.2  | 1.2 | Golgi uridine diphosphate-N-acetylglucosamine transpo          | YEL004w          | orf19.8962  |
| CA0890 | IPF11766     | 1.0  | 1.2  | 1.2  | 1.2 | unknown function                                               |                  | orf19.4734  |
| CA2007 | GPI8         | -1.1 | 1.1  | 1.1  | 1.2 | essential for GPI anchor attachment (by homology)              | YDR331w          | orf19.2799  |
| CA0605 | UTR2         | -1.1 | 1.0  | -1.0 | 1.2 | 1,3-1,4-beta-glucanase (by homology)                           | YEL040w          | orf19.9240  |
| CA5962 | ALO1         | -1.2 | 1.1  | 1.3  | 1.2 | D-arabinono-1,4-lactone oxidase (by homology)                  | YML086c          | orf19.7551  |
| CA4163 | IPF9301      | 1.1  | 1.2  | 1.2  | 1.2 | unknown function                                               | YOR051c          | orf19.5812  |
| CA4923 | IPF1413.3    | 1.2  | 1.2  | 1.1  | 1.2 | unknown function, 3-prime end                                  | YFR011c          |             |
| CA4722 | SAC1         | 1.1  | 1.1  | 1.3  | 1.2 | integral membrane protein localizing to the ER and Golc        | YKL212w          | orf19.12329 |
| CA3159 | PLC3         | 1.1  | 1.2  | 1.4  | 1.2 | phosphatidylinositol phospholipase C                           |                  | orf19.1586  |
| 5124.1 |              | -1.0 | 1.2  | 1.3  | 1.2 |                                                                |                  |             |
| CA5084 | IMP1         | 1.1  | 1.3  | 1.3  | 1.2 | protease, mitochondrial (by homology)                          | YMR150c          | orf19.3061  |
| CA1760 | PF17914.3EOC | 1.3  | 1.1  | 1.4  | 1.2 | unknown function                                               | Missing in array | orf19.5124  |
| CA5444 | IPF230       | -1.3 | 1.0  | 1.2  | 1.2 | unknown function                                               | YJL207c          | orf19.3247  |
| CA0376 | QCR9         | 1.1  | -1.0 | 1.1  | 1.2 | ubiquinol--cytochrome-c reductase subunit 9(by homolo          | YGR183c          |             |
| CA0262 | IPF20054     | -1.0 | 1.2  | 1.7  | 1.2 | unknown function                                               | YBR287w          | orf19.1407  |
| CA5789 | IPF1143      | -1.1 | 1.2  | 1.1  | 1.2 | Probable zinc-finger protein                                   | YER116c          | orf19.5438  |
| CA0512 | VMA16        | 1.3  | -1.0 | 1.4  | 1.2 | H+-ATPase 23 KD subunit, vacuolar (by homology)                | YHR026w          | orf19.4954  |
| CA1972 | RPL27A       | 1.6  | 1.2  | 1.2  | 1.2 | ribosomal protein L27                                          | YHR010w          |             |
| CA1606 | NCS1         | 1.1  | 1.1  | 1.0  | 1.2 | Calcium binding protein (by homology)                          | YDR373w          | orf19.4726  |
| CA4206 | IPF9079      | 1.1  | 1.1  | 1.3  | 1.2 | Membrane transporter (by homology)                             | YCR023c          | orf19.4550  |
| CA5065 | IPF3584      | 1.0  | 1.2  | 1.3  | 1.2 | similar to <i>Saccharomyces cerevisiae</i> Pab1p mRNA poly     | YER165w          | orf19.3037  |
| CA6155 | IPF1846      | 1.1  | 1.2  | 1.4  | 1.2 | unknown function                                               | YJR041c          | orf19.5884  |
| CA2958 | KRE9         | 1.0  | 1.1  | 1.3  | 1.2 | cell wall synthesis protein                                    | YJL174w          | orf19.5861  |
| CA5162 | IPF982       | 1.0  | 1.1  | 1.1  | 1.2 | Weakly similar to human dolichol-phosphate-mannose synthase    |                  |             |
| CA2702 | EMP70        | 1.2  | 1.2  | 1.5  | 1.2 | Endosomal protein (by homology)                                | YLR083c          | orf19.10260 |
| CA5678 | IPF1292      | 1.0  | 1.2  | 1.7  | 1.2 | unknown function Hypothetical zinc-finger protein              |                  | orf19.7381  |

|        |             |      |      |      |     |                                                               |         |             |
|--------|-------------|------|------|------|-----|---------------------------------------------------------------|---------|-------------|
| CA5717 | CYP51       | 1.2  | 1.2  | 1.1  | 1.2 | Cyclophilin - peptidylprolyl cis-trans isomerase or PPIas     | YDR304c | orf19.7421  |
| CA2931 | IPF7841     | -1.1 | 1.2  | 1.1  | 1.2 | similar to <i>Saccharomyces cerevisiae</i> Ndc1p nuclear env  | YML031w | orf19.4203  |
| CA2367 | SUI1        | 1.1  | 1.1  | 1.3  | 1.2 | translation initiation factor 3 (eIF3) (by homology)          | YNL244c | orf19.8867  |
| CA3059 | TRR1        | -1.0 | 1.2  | 1.1  | 1.2 | Thioredoxin reductase (by homology)                           | YDR353w | orf19.11766 |
| CA2164 | AXL2        | 1.2  | 1.1  | 1.2  | 1.2 | similar to <i>saccharomyces cerevisiae</i> Axl2p required for | YIL140w | orf19.5292  |
| CA1836 | IPF5773     | 1.1  | 1.2  | 1.4  | 1.2 | unknown function                                              |         | orf19.3965  |
| CA3834 | PLB3        | -1.1 | 1.3  | 1.3  | 1.2 | phospholipase B (by homology)                                 | YMR008c | orf19.6594  |
| CA1837 | IPF5776     | 1.1  | 1.2  | 1.3  | 1.2 | ash2-trithorax family protein (by homology)                   | YLR015w | orf19.3964  |
| CA4439 | IPF13865    | 1.3  | 1.1  | 1.3  | 1.2 | unknown function                                              | YJL097w | orf19.5156  |
| CA4274 | LAP42       | -1.1 | -1.0 | 1.0  | 1.2 | Aminopeptidase yscl precursor, vacuolar (by homology)         |         | orf19.6671  |
| CA0981 | GAP4        | 1.0  | 1.1  | 1.9  | 1.2 | general amino acid permease (by homology)                     |         | orf19.1799  |
| CA2904 | IPL1        | -1.1 | -1.0 | -1.1 | 1.2 | Ser/thr protein kinase (by homology)                          | YPL209c | orf19.3474  |
| CA1935 | IPF19936    | 1.0  | 1.2  | 1.3  | 1.2 | unknown function                                              | YGR203w | orf19.4185  |
| CA1279 | RSP5        | -1.0 | 1.1  | 1.2  | 1.2 | ubiquitin-protein ligase (by homology)                        | YER125w | orf19.3628  |
| CA5742 | FUN31       | 1.0  | 1.1  | 1.2  | 1.2 | Serine/threonine kinase (by homology)                         | YAL017w | orf19.7451  |
| CA1515 | ECM21.3     | -1.1 | 1.2  | 1.1  | 1.2 | Involved in cell wall biogenesis and architecture (by hon     | YBL101c | orf19.12351 |
| CA0954 | IPF13162    | 1.1  | 1.1  | 1.3  | 1.2 | unknown function                                              | YNL101w | orf19.1142  |
| CA2216 | IPF6235     | -1.1 | 1.3  | 1.2  | 1.2 | <i>Candida albicans</i> Tca2 retrotransposon                  |         | orf19.5372  |
| CA3550 | IPF13228    | 1.0  | 1.1  | 1.3  | 1.2 | unknown function                                              |         | orf19.3874  |
| CA6103 | SFP1        | -1.0 | 1.3  | 1.4  | 1.2 | zinc finger protein (by homology)                             | YLR403w | orf19.5953  |
| CA3587 | AAH1        | 1.1  | 1.3  | 1.2  | 1.2 | adenosine deaminase (by homology)                             | YNL141w | orf19.2251  |
| CA1761 | IPF7602     | 1.0  | 1.2  | 1.5  | 1.2 | oxidoreductase (by homology)                                  |         | orf19.5193  |
| CA1997 | YCF1        | -1.2 | 1.1  | 1.2  | 1.2 | Glutathione S-conjugate transporter (by homology)             | YDR135c | orf19.6478  |
| CA5569 | PRE8        | 1.1  | 1.0  | 1.1  | 1.2 | 20S proteasome subunit Y7 (by homology)                       | YML092c | orf19.7335  |
| CA2185 | IPF6880     | 1.0  | 1.0  | 1.2  | 1.2 | unknown function                                              |         | orf19.4247  |
| CA4937 | TFP3        | 1.0  | 1.1  | 1.4  | 1.2 | H <sup>+</sup> -ATPase by homology                            | YPL234c | orf19.6538  |
| CA0269 | PUF2.EXON1  | 1.1  | 1.1  | 1.0  | 1.2 | RNA-binding protein (by homology)                             |         | orf19.4263  |
| CA2591 | IPF18448.3  | 1.2  | 1.2  | 1.4  | 1.2 | unknown function, 3-prime end                                 |         | orf19.60    |
| CA3122 | IPF5356     | 1.0  | 1.1  | 1.3  | 1.2 | unknown function                                              | YDR262w | orf19.3004  |
| CA2375 | IPF15504    | -1.0 | -1.0 | -1.1 | 1.2 | unknown function                                              | YGL138c | orf19.2211  |
| CA2736 | ATE1        | -1.1 | 1.1  | 1.2  | 1.2 | arginyl tRNA transferase (by homology)                        | YGL017w | orf19.2110  |
| CA0531 | UBC1        | 1.2  | 1.0  | 1.4  | 1.2 | ubiquitin-conjugating enzyme by homology                      | YDR177w | orf19.8686  |
| CA0070 | IPF19295.3F | 1.0  | 1.4  | 1.1  | 1.2 | unknown function, 3-prime end                                 |         | orf19.6469  |
| CA4174 | IPF4119.5   | 1.3  | 1.1  | 1.5  | 1.2 | unknown function, 5-prime end                                 |         |             |
| CA2286 | IPF5369     | 1.1  | 1.1  | -1.0 | 1.2 | unknown function                                              | YKL069w | orf19.5553  |
| CA2462 | CDC16       | 1.2  | 1.1  | 1.2  | 1.2 | subunit of anaphase-promoting complex (by homology)           | YKL022c | orf19.1792  |
| CA4602 | IPF6231     | 1.1  | 1.1  | 1.1  | 1.2 | unknown function                                              | YCL033c | orf19.10802 |
| CA3606 | RTA3        | -1.0 | 1.1  | 1.3  | 1.2 | Unknown function                                              |         | orf19.23    |
| CA1211 | IPF7031.3   | 1.2  | 1.0  | 1.3  | 1.2 | unknown function, 3-prime end                                 | YPR063c |             |
| SCADH1 |             | 1.0  | 1.1  | 1.1  | 1.2 |                                                               |         |             |
| CA3173 | IPF14145    | 1.1  | 1.1  | 1.3  | 1.2 | unknown function                                              |         | orf19.1401  |
| CA1566 | DPP2        | 1.2  | 1.2  | 1.4  | 1.2 | Diacylglycerol pyrophosphate phosphatase (by homology)        |         | orf19.1155  |
| CA3287 | IPF14295    | 1.1  | 1.2  | 1.2  | 1.2 | putative Sed1p-like cell surface protein (by homology)        |         | orf19.6321  |
| CA3766 | IPF18298.3  | -1.1 | -1.2 | 1.1  | 1.2 | unknown function, 3-prime end                                 |         | orf19.2903  |
| CA2550 | IPF9099     | -1.0 | 1.2  | 1.1  | 1.2 | similar to <i>Saccharomyces cerevisiae</i> Aos1p activating e | YPR180w | orf19.2835  |
| CA3181 | IPF12241    | 1.1  | 1.2  | 1.2  | 1.2 | unknown function                                              |         | orf19.2132  |
| CA3320 | IPF6898     | -1.2 | 1.1  | 1.1  | 1.2 | similar to <i>Saccharomyces cerevisiae</i> Bub1p serine/thre  | YGR188c | orf19.2678  |
| CA3245 | IPF19980    | -1.1 | 1.0  | 1.2  | 1.2 | putative lipase (by homology)                                 | YJR107w | orf19.4678  |
| CA2888 | GIM5        | 1.1  | 1.2  | 1.2  | 1.2 | Gim complex component (by homology)                           | YML094w | orf19.2471  |

|            |             |      |      |      |     |                                                                     |         |             |
|------------|-------------|------|------|------|-----|---------------------------------------------------------------------|---------|-------------|
| CA4780     | IPF3352     | 1.0  | 1.1  | 1.1  | 1.2 | unknown function                                                    | YHR045w | orf19.4013  |
| CA0044     | IPF17347    | -1.0 | 1.3  | 1.3  | 1.2 | unknown function                                                    |         | orf19.6492  |
| CA2609     | IPF5457     | 1.2  | 1.1  | 1.3  | 1.2 | similar to <i>Saccharomyces cerevisiae</i> sec28p epsilon-CC        | YIL076w | orf19.5689  |
| CA0200     | IPF15119    | 1.1  | 1.1  | 1.4  | 1.2 | unknown function                                                    | YKL175w | orf19.9109  |
| CA3084     | IPF11625    | 1.1  | -1.1 | -1.1 | 1.2 | unknown function                                                    |         | orf19.4149  |
| CA0490     | COS161      | 1.2  | 1.3  | 1.7  | 1.2 | involved in manganese homeostasis (by homology)                     |         | orf19.2637  |
| CA3387     | MUP3        | -1.0 | 1.2  | 1.4  | 1.2 | Very low affinity methionine permease                               | YHL036w | orf19.7953  |
| CA5508     | IPF745      | 1.1  | 1.1  | 1.3  | 1.2 | unknown function                                                    |         | orf19.5352  |
| CA4536     | COX13       | 1.2  | -1.0 | 1.1  | 1.2 | cytochrome-c oxidase chain VIa (by homology)                        | YGL191w | orf19.1467  |
| CA0152     | IPF16368.3F | -1.1 | 1.5  | 1.3  | 1.2 | unknown function, 3-prime end                                       |         | orf19.254   |
| CA0971     | IPF11428    | 1.2  | -1.0 | 1.1  | 1.2 | unknown function                                                    |         | orf19.6470  |
| CA0644     | IPF17131    | -1.0 | 1.3  | 1.2  | 1.2 | unknown function                                                    |         | orf19.69    |
| CA0977     | IPF18810    | -1.0 | 1.3  | 1.3  | 1.2 | unknown function                                                    | YNL215w | orf19.11087 |
| CA0441     | IPF12472    | 1.0  | 1.2  | 1.4  | 1.2 | unknown function                                                    |         | orf19.13018 |
| CA3792     | UGA5        | 1.1  | 1.1  | 1.0  | 1.2 | GABA-SPECIFIC TRANSPORT PROTEIN by homology to <i>S. cerevisiae</i> |         | orf19.5826  |
| CA2680     | MCI4        | 1.4  | 1.1  | 1.2  | 1.2 | NADH dehydrogenase (ubiquinone)                                     |         | orf19.2570  |
| CA0603     | IPF1709     | 1.1  | 1.0  | 1.4  | 1.2 | unknown function                                                    | YDR100w | orf19.3076  |
| CA3105     | IPF12083    | 1.1  | 1.2  | 1.3  | 1.2 | unknown function                                                    |         | orf19.6553  |
| CA2240     | CRD2        | 1.5  | 1.1  | 1.4  | 1.2 | Cu-binding metallothionein                                          |         |             |
| CA2251     | IPF12845    | 1.2  | 1.2  | 1.4  | 1.2 | unknown function                                                    | YOR286w | orf19.2363  |
| Mice G3PDH |             | 1.0  | 1.1  | 1.3  | 1.2 |                                                                     |         |             |
| CA2318     | ILV1        | -1.1 | 1.2  | 1.3  | 1.2 | Threonine dehydratase (by homology)                                 | YER086w | orf19.5480  |
| CA1625     | IPF6156     | -1.2 | 1.3  | 1.3  | 1.2 | similar to <i>C.elegans</i> LIM homeobox protein                    |         | orf19.1034  |
| CA5604     | IPF549      | 1.1  | 1.2  | 1.7  | 1.2 | unknown function                                                    | YOR390w | orf19.7095  |
| CA3349     | IPF19588    | 1.1  | 1.1  | 1.4  | 1.2 | unknown function                                                    | YDR367w |             |
| CA4130     | IPF20009    | 1.1  | 1.1  | 1.1  | 1.2 | Unknown function                                                    | YBR129c | orf19.11720 |
| CA5714     | IPF2431     | 1.1  | 1.1  | -1.0 | 1.2 | similar to <i>Saccharomyces cerevisiae</i> Tsa1p thiol-specific     | YML028w | orf19.7417  |
| CA2135     | COX9        | 1.4  | 1.1  | 1.4  | 1.2 | CYTOCHROME C OXIDASE (by homology)                                  | YDL067c |             |
| CA2031     | RPL10A      | 1.2  | -1.0 | 1.1  | 1.2 | L10A ribosomal protein                                              | YPL220w | orf19.3465  |
| CA0915     | KAR2        | -1.2 | 1.3  | 1.1  | 1.2 | dnaK-type molecular chaperone (by homology)                         | YJL034w | orf19.9564  |
| CA2951     | SBP1        | -1.0 | 1.1  | 1.2  | 1.2 | RNA binding protein-like (by homology)                              | YHL034c | orf19.5854  |
| CA3228     | IPF9325     | 1.1  | -1.0 | 1.0  | 1.2 | unknown function                                                    |         | orf19.6288  |
| CA2215     | PFK26       | -1.1 | 1.2  | -1.1 | 1.2 | 6-phosphofructose-2-kinase (by homology)                            | YIL107c | orf19.4753  |
| CA5383     | ZORRO1B.3F  | 1.1  | 1.0  | 1.2  | 1.2 | reverse transcriptase, 3-prime end (by homology)                    |         | orf19.7273  |
| CA0896     | SBA1        | 1.2  | 1.3  | 1.3  | 1.2 | Hsp90 (Ninety) Associated Co-chaperone (by homology)                | YKL117w | orf19.5749  |
| CA5496     | IPF779      | 1.1  | 1.2  | 1.3  | 1.2 | E2 ubiquitin conjugating enzyme (by homology)                       |         | orf19.5337  |
| CA2581     | IPF9450     | 1.1  | 1.0  | 1.1  | 1.2 | unknown function                                                    |         | orf19.4370  |
| CA1980     | YHM1        | 1.1  | 1.2  | 1.2  | 1.2 | member of the mitochondrial carrier family (MCF) (by homology)      | YDL198c | orf19.685   |
| CA2038     | IPF17510    | -1.0 | 1.0  | 1.1  | 1.2 | unknown function                                                    | YDL157c | orf19.11836 |
| CA2739     | MUQ1        | 1.2  | 1.1  | 1.2  | 1.2 | choline phosphate cytidyltransferase (by homology)                  | YGR007w | orf19.2107  |
| CA6093     | ARF22       | -1.0 | 1.0  | 1.0  | 1.1 | GTP-binding protein of the ARF family (by homology)                 | YDL137w | orf19.5964  |
| COB        |             | -1.0 | -1.0 | 1.1  | 1.1 |                                                                     |         |             |
| CA1137     | IFN1        | -1.0 | 1.2  | 1.5  | 1.1 | glycerophosphoinositol transporter (by homology)                    |         | orf19.1979  |
| CA3943     | IPF4751     | 1.0  | 1.0  | 1.1  | 1.1 | unknown Function                                                    |         | orf19.1999  |
| CA2999     | MRPL8       | 1.0  | 1.2  | 1.2  | 1.1 | mitochondrial 60s ribosomal subunit (by homology)                   | YJL063c | orf19.6129  |
| CA2563     | ECM7        | 1.0  | 1.2  | 1.4  | 1.1 | cell wall biogenesis and architecture (by homology)                 | YLR443w | orf19.5643  |
| CA1223     | IPF14870    | 1.1  | 1.0  | 1.3  | 1.1 | unknown function                                                    | YCL045c | orf19.4131  |
| CA5038     | QDR2        | 1.1  | 1.1  | 1.4  | 1.1 | putative antibiotic resistance proteins (by homology)               |         | orf19.6992  |
| CA4216     | IPF5806     | -1.2 | 1.2  | 1.1  | 1.1 | unknown function                                                    | YLR422w | orf19.8435  |

|        |              |      |      |      |     |                                                               |          |             |
|--------|--------------|------|------|------|-----|---------------------------------------------------------------|----------|-------------|
| CA1875 | RPB9         | 1.1  | 1.1  | 1.4  | 1.1 | DNA-directed RNA polymerase II (by homology)                  | YGL070c  | orf19.2276  |
| CA3319 | DRS25.3EOC   | -1.2 | 1.4  | 1.1  | 1.1 | Probable ATPase, 3-prime end (by homology)                    | YMR162c  | orf19.2680  |
| CA4932 | IPF8374      | 1.0  | 1.2  | 1.2  | 1.1 | unknown function                                              | YLR205c  | orf19.6073  |
| CA5612 | KAP114       | -1.1 | 1.2  | 1.0  | 1.1 | putative RAN-binding protein/importin (by homology)           | YGL241w  | orf19.7086  |
| CA4898 | IPF1461      | 1.1  | 1.2  | 1.3  | 1.1 | putative NADH dehydrogenase (ubiquinone) (by homology)        |          | orf19.6035  |
| CA3422 | IPF17289     | -1.2 | 1.1  | 1.1  | 1.1 | unknown function                                              | YLR440c  | orf19.13553 |
| CA3809 | KAP123       | 1.3  | 1.3  | 1.2  | 1.1 | karyopherin-beta protein (by homology)                        | YER110c  | orf19.2489  |
| CA1431 | FET34.3EOC   | 1.0  | 1.1  | 1.2  | 1.1 | iron transport multicopper oxidase, 3-prime end (by homology) |          | orf19.1206  |
| CA5385 | ZORRO2B.3F   | 1.1  | 1.1  | 1.1  | 1.1 | reverse transcriptase, 3-prime end (by homology)              |          | orf19.7275  |
| CA2630 | COX5A        | 1.3  | -1.1 | 1.4  | 1.1 | cytochrome-c oxidase chain V.A precursor (by homolog          | YNL052w  | orf19.12223 |
| CA0763 | RPL11        | 1.4  | 1.0  | -1.1 | 1.1 | 60S ribosomal protein (by homology)                           | YPR102c  | orf19.2232  |
| CA0908 | MRPL31       | 1.3  | 1.1  | 1.2  | 1.1 | Mitochondrial ribosomal protein                               | YKL138c  | orf19.1485  |
| CA1441 | QCR8         | 1.5  | 1.0  | 1.1  | 1.1 | ubiquinol-cytochrome-c reductase chain VIII (by homolo        | YJL166w  |             |
| CA2373 | CBF5         | -1.2 | -1.1 | 1.1  | 1.1 | centromere/ microtubule binding protein                       | YLR175w  | orf19.1833  |
| CA3001 | IPF8841      | 1.4  | 1.2  | 1.3  | 1.1 | unknown function                                              | YBR262c  | orf19.6132  |
| CA1753 | IPF8245      | -1.0 | 1.1  | 1.1  | 1.1 | putative chitinase                                            | YDR371w  | orf19.1515  |
| CA5581 | RAD3         | -1.2 | 1.2  | 1.2  | 1.1 | DNA helicase/ATPase by homology                               | YER171w  | orf19.7119  |
| CA0316 | ALS1.3EOC    | 1.2  | 1.3  | 1.4  | 1.1 | agglutinin-like protein, 3-prime end                          |          | orf19.5741  |
| CA2666 | IPF16995     | 1.3  | 1.0  | -1.0 | 1.1 | unknown function                                              | YBL095w  | orf19.3548  |
| CA2546 | RPC31        | 1.0  | -1.0 | 1.1  | 1.1 | DNA-directed RNA polymerase III (by homology)                 | YNL151c  | orf19.2831  |
| CA0592 | IPF8862      | 1.0  | 1.1  | 1.1  | 1.1 | unknown function                                              |          | orf19.12370 |
| CA2345 | HNT1         | 1.3  | 1.2  | 1.2  | 1.1 | similarity to protein kinase C inhibitor-I (by homol          | YDL125c  | orf19.2341  |
| CA1510 | IPF9973      | 1.1  | -1.0 | 1.1  | 1.1 | similar to Saccharomyces cerevisiae Fau1p 5,10-methe          | YER183c  | orf19.4523  |
| CA3656 | IPF7456      | 1.0  | 1.1  | 1.2  | 1.1 | unknown function                                              | YOR289w  | orf19.2047  |
| CA2912 | IPF11206     | -1.0 | 1.1  | 1.2  | 1.1 | unknown function                                              |          | orf19.4515  |
| CA2026 | IPF9777      | 1.3  | 1.1  | 1.4  | 1.1 | unknown function                                              | YOL129w  | orf19.10962 |
| CA1791 | IPF13967     | -1.0 | 1.0  | 1.0  | 1.1 | unknown function                                              |          | orf19.5205  |
| CA0569 | CDC8         | 1.1  | 1.1  | 1.2  | 1.1 | dTMP kinase (by homology)                                     | YJR057w  | orf19.8730  |
| CA6141 | RPL19A.3     | 1.6  | 1.4  | 1.1  | 1.1 | Ribosomal protein L19.e, 3-prime end (by homology)            | YBR084ca | orf19.5904  |
| CA2303 | TOS1         | 1.3  | 1.1  | 1.3  | 1.1 | putative Anchor subunit of a-agglutinin (by homology)         | YBR162c  | orf19.1690  |
| CA6150 | IPF1857      | -1.3 | 1.4  | -1.1 | 1.1 | similar to Saccharomyces cerevisiae Hul4p hect domair         | YJR036c  | orf19.5892  |
| CA5804 | IPF4160      | 1.1  | 1.2  | 1.3  | 1.1 | unknown function                                              | YGR178c  | orf19.5459  |
| CA5912 | IPF5966      | -1.0 | 1.1  | 1.1  | 1.1 | unknown function                                              |          | orf19.6793  |
| CA2873 | AQY1         | 1.0  | 1.1  | 1.3  | 1.1 | similarity to plasma membrane and water channel prote         | YPR192w  | orf19.2849  |
| CA4154 | IPF20010     | -1.0 | 1.1  | -1.1 | 1.1 | unknown function                                              |          | orf19.5799  |
| CA3876 | APS3         | 1.1  | 1.2  | 1.1  | 1.1 | AP-3 complex subunit, sigma3 subunit (by homology)            | YJL024c  | orf19.8023  |
| CA6079 | RPL18.EXON2  | -1.0 | 1.1  | 1.1  | 1.1 | Ribosomal Protein RPL18B (large subunit), exon 2 (by t        | YOL120c  | orf19.5982  |
| CA1018 | PF13479.3EOC | -1.1 | 1.0  | 1.0  | 1.1 | unknown function, 3-prime end                                 |          | orf19.3768  |
| CA3571 | IPF3264      | -1.1 | 1.2  | 1.6  | 1.1 | unknown function                                              |          | orf19.10651 |
| CA0721 | IPF10429     | 1.1  | 1.0  | 1.2  | 1.1 | unknown function                                              | YMR295c  | orf19.10405 |
| CA1091 | SPT4         | 1.1  | -1.0 | 1.1  | 1.1 | transcription elongation protein (by homology)                | YGR063c  | orf19.3947  |
| CA4482 | IPF9154      | -1.0 | 1.3  | 1.2  | 1.1 | similar to Saccharomyces cerevisiae Ycs4p subunit of c        | YLR272c  | orf19.1883  |
| CA0972 | CYP1         | 1.1  | 1.2  | 1.1  | 1.1 | cyclophilin (peptidylprolyl isomerase), mitochondrial (by     | YDR155c  | orf19.6472  |
| CA4829 | IPF1210      | -1.0 | 1.1  | 1.1  | 1.1 | similar to Saccharomyces cerevisiae Nfu1p involved in l       | YKL040c  | orf19.2067  |
| CA0822 | EXG1         | -1.0 | 1.1  | 1.2  | 1.1 | glucan 1,3-beta-glucosidase                                   | YLR300w  | orf19.2990  |
| CA5933 | IPF2804      | -1.0 | 1.2  | 1.4  | 1.1 | unknown function                                              | YLL038c  | orf19.6770  |
| CA4061 | IPF5935      | -1.0 | 1.1  | 1.2  | 1.1 | Unknown function                                              | YHR078w  | orf19.438   |
| CA3957 | RBT2         | 1.0  | 1.0  | 1.2  | 1.1 | Repressed by TUP1 protein 2                                   |          | orf19.1415  |
| CA0674 | IPF19608     | 1.1  | 1.2  | 1.2  | 1.1 | unknown function                                              |          | orf19.8770  |

|        |              |      |      |      |     |                                                              |          |             |
|--------|--------------|------|------|------|-----|--------------------------------------------------------------|----------|-------------|
| CA2288 | IPF5376      | 1.0  | 1.0  | 1.0  | 1.1 | unknown function                                             |          | orf19.5557  |
| CA1054 | SAS3         | 1.1  | 1.1  | 1.2  | 1.1 | silencing protein (by homology)                              | YBL052c  | orf19.2540  |
| CA3814 | IPF4023      | 1.0  | 1.1  | 1.2  | 1.1 | unknown function                                             | YDR143c  | orf19.2498  |
| CA4225 | RPL39.3      | 1.4  | 1.1  | 1.2  | 1.1 | ribosomal protein L39, 3-prime end                           | YMR194w  |             |
| CA3347 | ERP5         | 1.0  | 1.1  | 1.1  | 1.1 | protein involved in membrane trafficking (by homology)       | YHR110w  |             |
| CA6068 | RPS19A.3     | 1.4  | 1.1  | -1.0 | 1.1 | ribosomal protein S19.e, 3-prime end (by homology)           | YOL121c  |             |
| CA1728 | WHI3         | 1.1  | 1.1  | 1.2  | 1.1 | Putative RNA binding protein (by homology)                   | YNL197c  | orf19.6494  |
| CA0932 | EPT1         | 1.4  | 1.1  | 1.3  | 1.1 | alcohol phosphatidyl transferase (by homology)               | YHR123w  | orf19.3695  |
| CA5886 | IPF2417      | 1.1  | 1.1  | 1.2  | 1.1 | unknown function                                             | YLR128w  | orf19.6822  |
| CA2294 | IPF19946     | -1.1 | 1.2  | 1.1  | 1.1 | similar to <i>Saccharomyces cerevisiae</i> Nbp35p nucleotide | YGL091c  | orf19.747   |
| CA5179 | MAK3         | 1.1  | 1.1  | 1.2  | 1.1 | N-acetyltransferase (by homology)                            | YPR051w  | orf19.4617  |
| CA2011 | RPS31        | 1.2  | 1.1  | -1.0 | 1.1 | Ubiquitin fusion protein                                     | YLR167w  | orf19.3087  |
| CA0189 | IPF12201     | 1.4  | 1.1  | 1.3  | 1.1 | Na <sup>+</sup> -nucleoside cotransporter (by homology)      |          | orf19.11600 |
| CA1460 | HAM1         | 1.0  | 1.0  | 1.1  | 1.1 | Controls 6-N-hydroxylaminopurine sensitivity and mutac       | YJR069c  | orf19.1108  |
| CA4070 | IPF2562      | 1.2  | 1.3  | 1.4  | 1.1 | unknown function                                             | YKL160w  | orf19.6623  |
| CA0125 | IPF4119      | 1.1  | 1.2  | 1.2  | 1.1 | unknown function                                             |          | orf19.9578  |
| CA4257 | PRE6         | 1.0  | 1.1  | 1.1  | 1.1 | 20S proteasome subunit                                       | YOL038w  |             |
| CA1169 | PF16120.3EOC | 1.2  | 1.1  | 1.4  | 1.1 | unknown function, 3-prime end                                |          | orf19.2751  |
| CA2508 | BET5         | -1.0 | 1.0  | 1.2  | 1.1 | targeting and fusion of ER to Golgi transport vesicles (b    | YML077w  | orf19.302   |
| CA5977 | UBC4.3       | 1.3  | 1.1  | 1.1  | 1.1 | E2 ubiquitin-conjugating enzyme, 3-prime end                 | YBR082c  | orf19.7571  |
| CA0145 | IPF11449     | -1.0 | 1.0  | -1.0 | 1.1 | unknown function                                             |          |             |
| CA0609 | CDR11.3F     | 1.1  | 1.1  | 1.3  | 1.1 | multidrug resistance protein, 3-prime end (by homology)      |          | orf19.919   |
| CA2172 | IPF15377     | -1.0 | 1.1  | 1.2  | 1.1 | probable membrane protein involved in bipolar budding        | YLR084c  | orf19.3765  |
| CA4300 | HIS2         | -1.0 | 1.2  | 1.2  | 1.1 | Histidinol phosphatase (by homology)                         | YFR025c  | orf19.6699  |
| CA5954 | IPF3508      | -1.0 | 1.2  | 1.2  | 1.1 | unknown function                                             | YLL036c  | orf19.6740  |
| CA1894 | PRE7.EXON1   | 1.0  | 1.1  | 1.2  | 1.1 | putative subunit of 20S proteasome, exon 1 (by homolo        | YBL041w  | orf19.2755  |
| CA2804 | IPF19961     | 1.1  | 1.3  | 1.2  | 1.1 | unknown function                                             | YBR096w  | orf19.5777  |
| CA1100 | IPF5681      | -1.0 | 1.1  | 1.3  | 1.1 | unknown function                                             |          | orf19.12417 |
| CA2285 | IPF12629     | -1.1 | 1.1  | 1.4  | 1.1 | unknown function                                             | YOL063c  | orf19.5552  |
| CA6112 | IPF97        | 1.0  | 1.2  | 1.3  | 1.1 | unknown function                                             | YML067c  | orf19.5941  |
| CA5381 | IPF5222      | 1.3  | 1.1  | 1.1  | 1.1 | arylalkylamine n-acetyltransferase (by homology)             | YDR071c  | orf19.7269  |
| CA3944 | IPF4750      | 1.0  | 1.3  | 1.3  | 1.1 | unknown Function                                             |          | orf19.1998  |
| CA5005 | CDC62        | 1.0  | 1.0  | 1.1  | 1.1 | Cell division control protein (by homology)                  |          |             |
| CA0147 | IPF9690      | 1.1  | 1.1  | 1.1  | 1.1 | unknown function                                             | YBR101c  | orf19.11133 |
| CA2020 | IPF16901     | 1.1  | 1.0  | 1.1  | 1.1 | unknown function                                             |          | orf19.8462  |
| CA1889 | CBP6         | 1.1  | 1.1  | 1.1  | 1.1 | Apo-cytochrome B pre-mRNA processing protein (by hc          | YBR120c  |             |
| CA3110 | LPI9         | -1.0 | 1.3  | 1.1  | 1.1 | Microtubule-associated protein (by homology)                 | YOR227w  | orf19.6544  |
| CA0567 | RPS23        | 1.0  | -1.1 | -1.0 | 1.1 | Ribosomal protein S23 (by homology)                          | YPR132w  | orf19.13632 |
| CA2292 | VAC8         | -1.1 | 1.2  | 1.0  | 1.1 | required for vacuole inheritance and protein target          | YEL013w  | orf19.745   |
| CA4716 | IPF8666      | -1.0 | 1.1  | 1.1  | 1.1 | unknown function                                             | YDR295c  | orf19.6952  |
| CA1586 | ODC1         | 1.1  | 1.1  | 1.2  | 1.1 | Ornithine decarboxylase                                      | YKL184w  | orf19.6032  |
| CA4430 | IPF5577      | -1.0 | 1.1  | 1.2  | 1.1 | unknown function                                             | YNR029c  | orf19.5165  |
| CA2217 | POL0         | -1.1 | 1.3  | 1.2  | 1.1 | pol polyprotein, reverse transcripase                        |          | orf19.5373  |
| CA1776 | IPF14704     | 1.1  | 1.2  | 1.3  | 1.1 | unknown function                                             |          | orf19.1823  |
| CA3045 | IPF7297.3    | 1.2  | 1.0  | 1.1  | 1.1 | similar to <i>Saccharomyces cerevisiae</i> Mlc1p myosin ((M) | YGL106w  |             |
| CA5213 | SSR1         | 1.4  | 1.2  | 1.5  | 1.1 | Secretory Stress Response protein 1 (by homology)            | YLR390wa | orf19.7030  |
| CA3337 | IPF13583     | 1.6  | 1.1  | 1.1  | 1.1 | unknown function                                             | YHR101c  | orf19.2334  |
| CA2296 | SCL1         | 1.2  | 1.0  | 1.0  | 1.1 | Proteasome subunit YC7alpha (by homology)                    | YGL011c  | orf19.5378  |
| CA4269 | RPS25B       | 1.2  | 1.0  | 1.0  | 1.1 | Cytosolic ribosomal protein (by homology)                    | YLR333c  | orf19.6663  |



|        |            |      |      |      |     |                                                               |                            |             |
|--------|------------|------|------|------|-----|---------------------------------------------------------------|----------------------------|-------------|
| CA6122 | RPP2B      | 1.1  | 1.1  | 1.2  | 1.1 | acidic ribosomal protein (by homology)                        | YDR382w                    | orf19.5928  |
| CA5173 | CPS2.3F    | -1.1 | 1.0  | 1.0  | 1.1 | Carboxypeptidase YSCS precursor, 3-prime end (by homology)    |                            |             |
| CA1101 | IPF5678    | -1.0 | 1.1  | 1.1  | 1.1 | Unknown function                                              |                            | orf19.12415 |
| CA5341 | HSP10.3    | 1.1  | 1.0  | 1.0  | 1.1 | 10 kDa mitochondrial heat shock chaperonin, 3-prime e         | YOR020c                    |             |
| CA1600 | CTR2       | 1.1  | 1.2  | 1.2  | 1.1 | copper transport protein (by homology)                        | YHR175w                    | orf19.4720  |
| CA0457 | IPF15604   | -1.2 | 1.1  | 1.0  | 1.1 | transcription factor (by homology)                            | YFL031w                    | orf19.2432  |
| CA2885 | IPF7204    | -1.0 | 1.2  | 1.4  | 1.1 | unknown function                                              |                            | orf19.2475  |
| CA2837 | IPF8340    | -1.0 | -1.0 | 1.0  | 1.1 | unknown function                                              |                            | orf19.4789  |
| CA5024 | IPF3009    | -1.2 | 1.0  | 1.4  | 1.1 | similar to <i>Saccharomyces cerevisiae</i> Gpi1p required for | YGR216c                    | orf19.6977  |
| CA0219 | YAP3       | 1.0  | 1.0  | 1.2  | 1.1 | transcription factor of a fungal-specific family of bzip pro  | YHL009c                    | orf19.3193  |
| CA3685 | IPF19540   | 1.2  | -1.0 | 1.2  | 1.1 | unknown function                                              | YPL230w                    | orf19.723   |
| CA4403 | IPF8777    | 1.1  | -1.0 | 1.0  | 1.1 | unknown function                                              |                            | orf19.3107  |
| CA5942 | DLD2       | 1.0  | 1.2  | 1.3  | 1.1 | D-lactate ferricytochrome C oxidoreductase (by homolc         | YDL174c                    | orf19.6755  |
| CA5764 | IPF20031   | -1.1 | 1.1  | 1.1  | 1.1 | similar to <i>Saccharomyces cerevisiae</i> Psr2p plasma mer   | YLR019w                    | orf19.5406  |
| CA1709 | HOL2       | 1.1  | -1.0 | 1.0  | 1.1 | Multidrug-resistance protein subfamily 1 (by homology)        | YNR055c ; Missing in array | orf19.4889  |
| CA4964 | IPF3920    | 1.3  | 1.0  | 1.2  | 1.1 | unknown function                                              |                            | orf19.6509  |
| CA3999 | IPF10447   | -1.0 | 1.1  | 1.1  | 1.1 | unknown function                                              |                            | orf19.1637  |
| CA3724 | IPF6181    | 1.0  | 1.1  | 1.6  | 1.1 | similar to <i>Saccharomyces cerevisiae</i> Fun 26p nucleosid  | YAL022c                    | orf19.4174  |
| CA5246 | IPF19808   | 1.0  | 1.3  | 1.3  | 1.1 | unknown function                                              | A_A110                     | orf19.5016  |
| CA2817 | RPS16.3    | 1.2  | 1.1  | 1.1  | 1.1 | ribosomal protein, 3-prime end                                | YMR143w                    |             |
| CA1923 | IPF9130    | 1.5  | 1.0  | 1.3  | 1.1 | unknown function                                              |                            | orf19.5539  |
| CA1593 | MIG1       | -1.0 | 1.3  | 1.1  | 1.1 | transcriptional regulator                                     | YGL035c                    | orf19.4318  |
| CA0570 | SVL3       | 1.1  | 1.1  | 1.1  | 1.1 | Involved in vacuole function (by homology)                    | YPL032c                    | orf19.8732  |
| CA4381 | IPF20169   | 1.0  | 1.1  | 1.1  | 1.1 | unknown function                                              |                            | orf19.5674  |
| CA4576 | IPF9425.3  | 1.0  | 1.2  | 1.3  | 1.1 | unknown function, 3-prime end                                 |                            | orf19.6888  |
| CA5690 | OCH1       | 1.1  | 1.1  | 1.1  | 1.1 | Alpha-1,6-mannosyltransferase (by homology)                   | YGL038c                    | orf19.7391  |
| CA0037 | IPF17652.3 | -1.0 | 1.1  | 1.4  | 1.1 | reverse transcriptase, 3-prime end (by homology)              |                            | orf19.6078  |
| CA1029 | TLG2       | 1.1  | 1.1  | -1.0 | 1.1 | Syntaxin family of t-SNAREs (by homology)                     | YOL018c                    | orf19.9112  |
| CA6157 | GEF1.5F    | -1.1 | 1.2  | 1.1  | 1.1 | Voltage-gated chloride channel protein, 5-prime end (by       | YJR040w                    | orf19.5880  |
| CA6062 | IPF8307    | -1.0 | 1.0  | 1.2  | 1.1 | putative permease (by homology)                               |                            | orf19.6005  |
| CA5561 | SCO1       | 1.0  | 1.0  | 1.1  | 1.1 | Inner mitochondrial membrane protein (by homology)            | YBR037c                    | orf19.7325  |
| CA0541 | IPF14574   | 1.1  | 1.1  | 1.2  | 1.1 | unknown function                                              | YMR132c                    | orf19.1083  |
| CA4043 | IPF5291    | 1.0  | 1.1  | 1.3  | 1.1 | UDP-glucose 4-epimerase (by homology)                         |                            | orf19.3674  |
| CA0126 | IPF4284    | 1.1  | 1.1  | 1.2  | 1.1 | unknown function                                              | YOL026c                    | orf19.8177  |
| CA4625 | IPF5742    | -1.1 | 1.0  | 1.1  | 1.1 | thioredoxin-like protein (by homology)                        |                            | orf19.3319  |
| CA1403 | IPF14155   | 1.2  | 1.3  | 1.1  | 1.1 | similar to <i>Saccharomyces cerevisiae</i> Rim4p involved in  | YHL024w                    | orf19.3373  |
| CA1719 | ILV6       | 1.1  | 1.0  | 1.1  | 1.1 | acetolactate synthase, regulatory subunit (by homology)       | YCL009c                    | orf19.12119 |
| CA4338 | IPF3616    | -1.0 | 1.0  | 1.0  | 1.1 | Unknown function                                              | YNR064c                    | orf19.6709  |
| CA5601 | IPF556     | 1.0  | 1.1  | 1.1  | 1.1 | transcriptional regulator (by homology)                       | YKL070w                    | orf19.7098  |
| CA1602 | RTG1       | 1.1  | 1.1  | 1.1  | 1.1 | basic helix-loop-helix transcription factor that reg          | YOL067c                    | orf19.4722  |
| CA1530 | ALG2.5     | -1.0 | 1.0  | 1.2  | 1.1 | mannosyltransferase, 5-prime end (by homology)                | YGL065c                    | orf19.1221  |
| CA3469 | MNT1       | -1.2 | 1.1  | 1.2  | 1.1 | Mannosyltransferase involved in n-linked and o-linked g       | YOR099w                    | orf19.1665  |
| CA4309 | IPF2127.3  | -1.0 | 1.1  | 1.1  | 1.1 | unknown function, 3-prime end                                 |                            | orf19.4117  |
| CA1629 | NPI46      | 1.1  | 1.2  | 1.2  | 1.1 | proline cis-trans isomerase (by homology)                     | YLR449w                    | orf19.1030  |
| CA0271 | IPF12897   | -1.0 | 1.3  | 1.3  | 1.1 | putative oxidoreductase (by homology)                         |                            | orf19.9785  |
| CA6037 | ERC4       | 1.0  | 1.2  | 1.2  | 1.1 | ethionine resistance protein (by homology)                    |                            | orf19.7648  |
| CA4631 | VTI1       | -1.0 | 1.2  | 1.2  | 1.1 | v-SNARE involved in Golgi retrograde traffic (by homolc       | YMR197c                    | orf19.337   |
| CA4670 | IPF4536    | 1.0  | 1.1  | 1.2  | 1.1 | unknown function                                              |                            | orf19.904   |
| CA0951 | MNN6       | -1.3 | 1.2  | 1.1  | 1.1 | putative golgi alpha-1,2-mannosyltransferase (by homol        | YBR015c                    | orf19.1011  |

|        |              |      |      |      |     |                                                                                       |         |             |
|--------|--------------|------|------|------|-----|---------------------------------------------------------------------------------------|---------|-------------|
| CA1311 | IPF14233     | -1.0 | 1.1  | -1.0 | 1.1 | Putative transthyretin precursor (by homology)                                        |         | orf19.3633  |
| CA5843 | IPF416       | -1.1 | 1.2  | 1.3  | 1.1 | unknown function                                                                      | YLR328w | orf19.7499  |
| CA0984 | IPF7400      | -1.0 | 1.1  | 1.0  | 1.1 | unknown function                                                                      | YER049w | orf19.1802  |
| CA4068 | IPF5922      | 1.1  | 1.1  | 1.1  | 1.1 | unknown function                                                                      |         | orf19.446   |
| CA2883 | IPF3790      | -1.0 | 1.1  | 1.4  | 1.1 | unknown function                                                                      |         | orf19.5852  |
| CA0829 | SLC1         | 1.2  | 1.1  | 1.3  | 1.1 | fatty acyltransferase (by homology)                                                   | YDL052c | orf19.250   |
| CA3593 | YPT71        | 1.2  | 1.1  | 1.0  | 1.1 | GTP-binding protein of the RAB family (by homology)                                   | YML001w | orf19.2245  |
| CA0325 | IPF15222     | 1.0  | 1.1  | 1.0  | 1.1 | Unknown function                                                                      |         | orf19.3781  |
| CA4555 | IPF17555.3   | -1.0 | 1.1  | 1.0  | 1.1 | unknown function, 3-prime end                                                         | YLR206w | orf19.9019  |
| CA5614 | IPF522       | 1.1  | 1.3  | 1.4  | 1.1 | unknown function                                                                      |         | orf19.7084  |
| CA1887 | IPF5496      | 1.2  | 1.1  | 1.3  | 1.1 | unknown function                                                                      | YPL264c | orf19.2204  |
| CA2867 | IPF11688     | -1.1 | 1.2  | 1.1  | 1.1 | similar to <i>Saccharomyces cerevisiae</i> Apl4p AP-1 complex                         | YPR029c | orf19.2844  |
| CA0261 | LYS22        | -1.0 | 1.3  | 1.5  | 1.1 | Homocitrate synthase (by homology)                                                    | YDL131w | orf19.8394  |
| CA5654 | IPF15543     | -1.0 | 1.0  | 1.1  | 1.1 | unknown function                                                                      |         | orf19.7356  |
| CA3736 | IPF5533      | 1.3  | 1.5  | 1.2  | 1.1 | ABC transporter (by homology)                                                         | YER036c | orf19.2183  |
| CA1232 | IPF11815     | -1.1 | 1.0  | 1.3  | 1.1 | similar to <i>Saccharomyces cerevisiae</i> Lys14 triacylglycerol lipase (by homology) |         | orf19.4982  |
| CA0871 | APE3         | 1.1  | 1.1  | 1.0  | 1.1 | aminopeptidase (by homology)                                                          | YBR286w | orf19.3591  |
| CA3683 | PPZ1         | 1.1  | 1.2  | 1.3  | 1.1 | ser/thr phosphatase required for normal osmoregulation                                | YML016c | orf19.726   |
| CA5287 | IPF1922      | 1.1  | 1.1  | 1.3  | 1.1 | similar to multidrug resistance proteins                                              |         | orf19.7148  |
| CA3178 | IPF19974     | -1.0 | 1.1  | 1.1  | 1.1 | unknown function                                                                      |         | orf19.1406  |
| CA5463 | IPF284       | 1.0  | 1.1  | 1.3  | 1.1 | unknown function                                                                      |         | orf19.3272  |
| CA1638 | GRR1         | 1.0  | 1.2  | 1.2  | 1.1 | Required for glucose repression and for glucose and ca                                | YJR090c | orf19.3944  |
| CA3180 | IPF12244     | -1.1 | 1.1  | 1.3  | 1.1 | unknown function                                                                      | YKL034w | orf19.2131  |
| CA0530 | PF19633.3E0C | 1.0  | 1.2  | 1.1  | 1.1 | similar to <i>Saccharomyces cerevisiae</i> Cdc39p nuclear protein                     | YCR093w | orf19.8685  |
| CA4567 | IPF9555      | 1.0  | 1.2  | 1.1  | 1.1 | unknown function                                                                      | YAR008w | orf19.6879  |
| CA0568 | APS2         | -1.1 | 1.0  | 1.1  | 1.1 | AP-2 complex subunit, sigma2 subunit (by homology)                                    | YJR058c | orf19.8729  |
| CA3907 | IPF3304      | -1.1 | 1.1  | 1.1  | 1.1 | similar to <i>Saccharomyces cerevisiae</i> Aip1p actin cytoskeleton                   | YMR092c | orf19.11873 |
| CA5211 | IPF18125     | 1.0  | 1.1  | 1.1  | 1.1 | similar to glutenin and glutamine-rich proteins                                       |         | orf19.7028  |
| CA3840 | IPF12745     | 1.0  | 1.2  | 1.2  | 1.1 | unknown function                                                                      | YLR193c | orf19.6600  |
| CA4041 | GAL10        | -1.4 | 1.5  | 1.2  | 1.1 | UDP-glucose 4-epimerase by homology                                                   | YBR019c | orf19.3672  |
| CA1111 | RIB3         | 1.1  | 1.3  | 1.4  | 1.1 | 3,4-dihydroxy-2-butanone 4-phosphate synthase (by homology)                           | YDR487c | orf19.12693 |
| CA1062 | IPF14165     | 1.6  | -1.1 | 1.1  | 1.1 | unknown function                                                                      |         | orf19.4642  |
| CA5854 | IPF393       | 1.1  | 1.2  | 1.2  | 1.1 | similar to <i>Saccharomyces cerevisiae</i> Nup192p nucleoporin                        | YJL039c | orf19.7511  |
| CA3437 | IPF15925     | 1.0  | 1.2  | 1.3  | 1.1 | unknown function                                                                      |         | orf19.10505 |
| CA1607 | IPF14916     | 1.2  | 1.1  | 1.1  | 1.1 | unknown function                                                                      | YOL071w | orf19.4727  |
| CA1944 | IPF10645     | 1.2  | 1.1  | 1.1  | 1.1 | unknown function                                                                      | YOR154w | orf19.4738  |
| CA4129 | IPF6878      | 1.2  | -1.0 | 1.0  | 1.1 | unknown function                                                                      | YLR118c | orf19.11723 |
| CA0436 | RBL2         | 1.0  | 1.1  | 1.1  | 1.1 | Beta-tubulin binding protein (by homology)                                            | YOR265w |             |
| CA3323 | IKI1         | 1.1  | 1.0  | 1.1  | 1.1 | killer toxin insensitive protein                                                      | YHR187w | orf19.2676  |
| CA0663 | PUP2         | 1.2  | 1.3  | 1.3  | 1.1 | 20S proteasome subunit(alpha5) (by homology)                                          | YGR253c | orf19.709   |
| CA3570 | NOP1         | 1.1  | 1.2  | 1.1  | 1.1 | Fibrillarin                                                                           | YDL014w | orf19.3138  |
| CA3966 | IPF9376      | 1.1  | 1.1  | 1.4  | 1.1 | unknown function                                                                      | YLR004c | orf19.1427  |
| CA3773 | IPF11153     | -1.0 | -1.1 | 1.0  | 1.1 | unknown function                                                                      | YDR416w | orf19.2893  |
| CA5482 | -14094.REPEA | -1.1 | 1.0  | 1.1  | 1.1 | repeated protein (10 times) of unknown function                                       |         | orf19.5315  |
| CA3732 | IPF11898     | 1.1  | 1.0  | 1.2  | 1.1 | unknown function                                                                      |         | orf19.4182  |
| CA1168 | IPF13017     | 1.1  | 1.3  | 1.2  | 1.1 | unknown function                                                                      |         | orf19.1785  |
| CA0482 | IPF14763     | 1.6  | -1.2 | 1.1  | 1.1 | delta-12 fatty acid desaturase (by homology)                                          |         | orf19.7765  |
| CA3217 | DHH1         | 1.1  | 1.2  | 1.2  | 1.1 | RNA helicase by homology                                                              | YDL160c | orf19.6197  |
| CA4082 | PTC4         | -1.0 | 1.0  | 1.1  | 1.1 | ser/thr protein phosphatase PP2C(by homology)                                         | YBR125c | orf19.6638  |

|        |             |      |      |      |     |                                                                      |          |             |
|--------|-------------|------|------|------|-----|----------------------------------------------------------------------|----------|-------------|
| 1977.2 |             | -1.0 | -1.0 | 1.0  | 1.1 |                                                                      |          |             |
| CA2277 | DRS21       | 1.1  | 1.1  | 1.1  | 1.1 | Membrane-spanning Ca-ATPase (by homology)                            | YIL048w  | orf19.783   |
| CA0994 | IPF10077    | 1.0  | 1.0  | 1.0  | 1.1 | 3-oxoacid CoA-transferase by homology                                |          | orf19.2281  |
| CA3247 | IPF15832    | 1.2  | 1.1  | 1.2  | 1.1 | unknown function                                                     | YKL053ca | orf19.4676  |
| CA5657 | IPF14682    | 1.2  | 1.0  | 1.4  | 1.1 | putative transcription factor (by homology)                          | YNL027w  | orf19.7359  |
| CA4655 | IPF3098     | 1.1  | 1.0  | 1.5  | 1.1 | Putative mannosyltransferase (by homology)                           | YNL219c  | orf19.4442  |
| CA5251 | IPF1824     | 1.1  | 1.0  | -1.1 | 1.1 | unknown function                                                     | YPL269w  | orf19.5011  |
| CA1849 | IPF19932    | 1.1  | 1.0  | 1.1  | 1.1 | unknown function                                                     |          | orf19.640   |
| CA0996 | IPF10071    | 1.3  | 1.2  | 1.0  | 1.1 | catabolic 3-dehydroquinase (by homology)                             |          | orf19.9823  |
| CA4485 | IPF9160     | 1.0  | 1.1  | 1.2  | 1.1 | similar to <i>Saccharomyces cerevisiae</i> Med4ptranscriptio         | YOR174w  | orf19.1878  |
| CA0631 | IPF11698    | 1.0  | 1.1  | 1.3  | 1.1 | similar to <i>Saccharomyces cerevisiae</i> Esbp6p probable r         | YNL125c  | orf19.11813 |
| CA5278 | CTA29.EXON2 | 1.2  | 1.1  | 1.1  | 1.1 | Protein with putative transcription activation domain, exon 2        |          |             |
| CA3270 | LYS5        | -1.1 | 1.0  | 1.1  | 1.1 | L-aminoadipate-semialdehyde dehydrogenase (by hom                    | YGL154c  | orf19.6304  |
| CA0775 | IFK2        | -1.1 | 1.1  | 1.2  | 1.1 | probable monooxygenase (by homology)                                 |          | orf19.856   |
| CA0297 | CDC53       | -1.3 | -1.2 | -1.3 | 1.1 | Cell division control protein (by homology)                          | YDL132w  | orf19.1674  |
| CA5358 | IPF846      | -1.1 | 1.3  | 1.1  | 1.1 | WD-repeat protein, beta-transducin (by homology)                     | YMR102c  | orf19.7235  |
| CA4015 | IPF12268    | 1.1  | 1.0  | 1.0  | 1.1 | unknown function                                                     |          |             |
| CA0124 | RFC5        | -1.0 | 1.1  | 1.0  | 1.1 | DNA replication factor C (by homology)                               | YBR087w  | orf19.9577  |
| CA1768 | IPF7585     | 1.1  | 1.0  | 1.0  | 1.1 | unknown function                                                     | YER050c  | orf19.5201  |
| CA6005 | PUP1        | 1.1  | 1.3  | 1.4  | 1.1 | 20S proteasom ebeta2 subunit (by homology)                           | YOR157c  | orf19.7605  |
| CA5911 | IPF5965     | -1.1 | 1.0  | 1.1  | 1.1 | NADH-ubiquinone oxidoreductase (by homology)                         |          | orf19.6794  |
| CA5853 | LSM6        | 1.1  | 1.1  | 1.2  | 1.1 | U6 snRNA-associated Sm-like protein (by homology)                    | YDR378c  |             |
| CA4042 | TRS23       | 1.1  | 1.2  | 1.2  | 1.1 | targeting and fusion of ER to golgi transport vesicles by            | YDR246w  | orf19.3673  |
| CA6143 | IPF1873     | -1.1 | 1.2  | 1.2  | 1.1 | putative GTP-binding protein (by homology)                           |          | orf19.5902  |
| CA2102 | IPF9363     | -1.0 | 1.1  | 1.0  | 1.1 | similar to <i>Saccharomyces cerevisiae</i> Yku80p componer           | YMR106c  | orf19.2383  |
| CA2002 | IPF16470    | 1.0  | 1.1  | 1.2  | 1.1 | unknown function                                                     | YBL036c  | orf19.2794  |
| CA2587 | RPS30.3     | 1.2  | 1.1  | 1.1  | 1.1 | 40S ribosomal protein S30, 3-prime end (by homology)                 | YOR182c  |             |
| CA2807 | IPF11965    | -1.2 | 1.3  | 1.1  | 1.1 | unknown function                                                     | YOR022c  | orf19.5782  |
| CA5868 | IPF351      | 1.1  | 1.2  | 1.2  | 1.1 | unknown function                                                     | YMR090w  | orf19.7531  |
| CA3072 | ERG12       | -1.0 | 1.2  | 1.2  | 1.1 | Mevalonate kinase (by homology)                                      | YMR208w  | orf19.4809  |
| CA1553 | IPF14081    | 1.1  | 1.2  | 1.4  | 1.1 | unknown function                                                     |          | orf19.1714  |
| CA3740 | SIT1        | 1.1  | 1.2  | 1.6  | 1.1 | Ferrioxamine B permease by homology                                  | YHL040c  | orf19.2179  |
| CA2369 | TBP1        | 1.1  | 1.2  | 1.1  | 1.1 | TATA-binding protein (by homology)                                   | YER148w  | orf19.1837  |
| CA5491 | IPF798      | 1.1  | 1.1  | 1.1  | 1.1 | transcriptional regulator (by homology)                              | YGL209w  | orf19.5326  |
| CA3646 | IPF4128     | 1.1  | 1.0  | 1.2  | 1.1 | unknown function                                                     |          | orf19.2037  |
| CA0468 | DIB1        | 1.0  | 1.0  | 1.1  | 1.1 | Component of the U4/U6.U5 snRNP (by homology)                        | YPR082c  | orf19.9531  |
| CA1978 | IPF9580     | -1.1 | -1.0 | 1.0  | 1.1 | unknown function                                                     |          | orf19.687   |
| CA5068 | IPF3592     | -1.0 | 1.2  | 1.2  | 1.1 | unknown function                                                     | YGR068c  | orf19.3041  |
| CA4253 | IPF4288     | 1.0  | 1.0  | 1.1  | 1.1 | unknown function                                                     |          |             |
| CA2489 | IPF7217     | -1.0 | 1.5  | 1.2  | 1.1 | unknown function                                                     |          | orf19.11525 |
| CA1372 | IPF15844    | 1.0  | 1.0  | 1.1  | 1.1 | similar to <i>Saccharomyces cerevisiae</i> Stp2p involved in $\zeta$ | YHR006w  | orf19.4961  |
| CA3120 | IPF5358     | 1.0  | 1.0  | 1.2  | 1.1 | unknown function                                                     | YDR357c  | orf19.3007  |
| CA4040 | GAL1        | -1.0 | 1.1  | 1.2  | 1.1 | galactokinase                                                        | YDR009w  | orf19.3670  |
| CA4120 | SOD1.3      | 1.1  | 1.1  | 1.1  | 1.1 | Cu,Zn-superoxide dismutase, 3-prime end                              | YJR104c  |             |
| CA2283 | MRT4        | -1.0 | 1.1  | 1.1  | 1.1 | required for mRNA decay (by homology)                                | YKL009w  | orf19.12996 |
| CA5091 | ACF3        | 1.1  | 1.3  | 1.2  | 1.1 | endo-1,3-beta-glucanase                                              | YNR067c  | orf19.10584 |
| CA0357 | FCY22       | 1.0  | 1.1  | 1.3  | 1.1 | purine-cytosine permease (by homology)                               | YER060w  | orf19.333   |
| CA0604 | VID21       | -1.0 | -1.0 | -1.0 | 1.1 | unknown function                                                     | YDR359c  | orf19.3077  |
| CA4589 | BEL1.EXON2  | 1.1  | 1.1  | 1.2  | 1.1 | protein of the 40S ribosomal subunit, exon 2 (by homology)           |          |             |

|        |            |      |      |      |     |                                                               |         |             |
|--------|------------|------|------|------|-----|---------------------------------------------------------------|---------|-------------|
| CA0041 | IPF10360   | 1.1  | 1.3  | 1.3  | 1.1 | unknown function                                              | YMR134w | orf19.3804  |
| CA5042 | IPF4514    | -1.1 | 1.1  | 1.1  | 1.1 | putative alpha-1,3-mannosyltransferase (by homology)          |         | orf19.6996  |
| CA2053 | IPF11029   | 1.1  | 1.0  | 1.3  | 1.1 | unknown function                                              |         | orf19.5720  |
| CA4643 | PRE9       | -1.0 | 1.0  | 1.0  | 1.1 | 20S proteasome subunit Y13 (alpha3) (by homology)             | YGR135w | orf19.350   |
| CA1643 | IPF9347    | -1.0 | 1.0  | 1.2  | 1.1 | unknown function                                              |         | orf19.1729  |
| CA3522 | IPF20134   | 1.1  | -1.1 | 1.1  | 1.1 | unknown function                                              |         | orf19.994   |
| CA4453 | CHL4       | 1.0  | 1.1  | 1.1  | 1.1 | chromosome segregation protein (by homology)                  | YDR254w | orf19.6851  |
| CA5790 | IPF1144    | -1.0 | 1.1  | 1.1  | 1.1 | unknown function                                              |         | orf19.5439  |
| CA5559 | CBP1       | -1.2 | 1.1  | 1.2  | 1.1 | Corticosteroid binding protein                                |         | orf19.7323  |
| CA5029 | IPF2997    | -1.0 | 1.0  | 1.0  | 1.1 | unknown function                                              |         | orf19.6983  |
| CA5007 | IPF12579   | -1.0 | 1.0  | 1.0  | 1.1 | putative phospholipase A2 (by homology)                       | YNL040w | orf19.5239  |
| CA1090 | COX18      | -1.0 | 1.0  | 1.3  | 1.1 | protein required for activity of mitochondrial cytochrome     | YGR062c | orf19.3946  |
| CA3556 | IPF7764    | 1.0  | 1.0  | 1.1  | 1.1 | unknown function                                              |         | orf19.3885  |
| CA4262 | IPF2275    | -1.0 | -1.0 | 1.3  | 1.1 | unknown function                                              |         | orf19.6654  |
| CA4081 | IPF2523    | 1.0  | 1.2  | 1.1  | 1.1 | unknown function                                              |         | orf19.6637  |
| CA2640 | IPF2930    | 1.1  | 1.2  | 1.2  | 1.1 | Suppressor of PAB1 (by homology)                              |         |             |
| CA3431 | FUN9       | 1.0  | 1.0  | 1.3  | 1.1 | Protein involved in vesicular transport between the endc      | YAL042w | orf19.586   |
| CA0466 | URA4       | 1.1  | 1.1  | 1.1  | 1.1 | dihydroorotase (by homology)                                  | YLR420w | orf19.1977  |
| CA1418 | IPF16124   | 1.1  | 1.1  | 1.4  | 1.1 | zinc-finger containing protein (by homology)                  | YOR113w | orf19.173   |
| CA3902 | YVH1       | 1.1  | 1.0  | 1.1  | 1.1 | protein tyrosine phosphatase (by homology)                    | YIR026c | orf19.4401  |
| CA2092 | RPL21A.3   | 1.1  | -1.1 | -1.1 | 1.1 | Ribosomal protein, 3-prime end (by homology)                  | YBR191w | orf19.840   |
| CA1483 | YHC3       | -1.1 | 1.1  | 1.1  | 1.1 | involved in cellular pH homeostasis (by homology)             | YJL059w | orf19.4059  |
| CA1743 | IPF12209   | 1.0  | 1.1  | 1.0  | 1.1 | similar to <i>Saccharomyces cerevisiae</i> Eco1p involved in  | YFR027w | orf19.5053  |
| 6532.2 |            | 1.0  | 1.1  | 1.2  | 1.1 |                                                               |         |             |
| CA4561 | IPF8031    | 1.0  | 1.5  | 1.5  | 1.1 | unknown function                                              | YLR126c | orf19.6872  |
| CA5458 | IPF274     | -1.0 | 1.0  | 1.1  | 1.1 | unknown function                                              |         | orf19.3266  |
| CA6118 | IPF126     | 1.1  | 1.1  | 1.3  | 1.1 | unknown function                                              | YLR241w | orf19.5932  |
| CA2693 | IPF9173.5F | 1.0  | 1.0  | 1.1  | 1.1 | similar to <i>Saccharomyces cerevisiae</i> Vps30p involved in | YPL120w | orf19.10247 |
| CA1915 | IPF16565   | 1.3  | 1.1  | 1.2  | 1.1 | unknown function                                              |         | orf19.2439  |
| CA1252 | RPN1       | -1.1 | 1.1  | 1.1  | 1.1 | 26S proteasome regulatory subunit (by homology)               | YHR027c | orf19.12421 |
| CA2190 | AOX1       | -1.0 | -1.0 | 1.1  | 1.1 | alternative oxidase (by homology)                             |         | orf19.4774  |
| CA4627 | DUT1       | 1.2  | 1.0  | 1.0  | 1.1 | dUTP pyrophosphatase                                          | YBR252w | orf19.10832 |
| CA1771 | SEH1       | 1.0  | 1.0  | 1.1  | 1.1 | nuclear pore protein (by homology)                            | YGL100w | orf19.2186  |
| CA3087 | SMD3       | 1.0  | -1.0 | 1.0  | 1.1 | core snRNP protein (by homology)                              | YLR147c | orf19.11622 |
| CA4102 | RPL37B     | 1.1  | 1.1  | 1.1  | 1.1 | Ribosomal protein                                             | YDR500c |             |
| CA0997 | IPF9998    | 1.1  | 1.0  | 1.2  | 1.1 | unknown function                                              |         | orf19.9824  |
| CA1512 | IPF15255   | 1.1  | 1.1  | 1.0  | 1.1 | unknown function                                              | YEL007w | orf19.4884  |
| CA1213 | VPS15.5F   | 1.0  | 1.0  | -1.0 | 1.1 | serine/threonine protein kinase, 5-prime end (by homolc       | YBR097w | orf19.7776  |
| CA3338 | IPF13582   | -1.1 | 1.1  | -1.1 | 1.1 | unknown function                                              | YHR009c | orf19.2333  |
| CA3285 | IPF6280    | 1.0  | 1.1  | 1.0  | 1.1 | unknown function                                              | YJR085c | orf19.6318  |
| CA4922 | IPF1415    | 1.3  | 1.1  | 1.2  | 1.1 | unknown function                                              | YPL098c | orf19.6062  |
| CA4678 | IPF3670    | -1.2 | 1.0  | 1.0  | 1.1 | unknown function                                              | YDR137w | orf19.894   |
| CA5837 | IPF426     | 1.1  | -1.0 | 1.1  | 1.1 | unknown function                                              | YLL002w | orf19.7491  |
| CA0942 | IPF8619    | -1.0 | 1.0  | 1.1  | 1.1 | unknown function                                              |         | orf19.3706  |
| CA3730 | IPF11900   | 1.1  | 1.1  | 1.1  | 1.1 | unknown function                                              | YLR292c | orf19.4180  |
| CA0792 | DIT2       | 1.1  | 1.1  | 1.1  | 1.1 | putative cytochrome P450                                      | YDR402c | orf19.554   |
| CA0578 | IPF9605    | -1.1 | 1.1  | 1.0  | 1.1 | similar to <i>Saccharomyces cerevisiae</i> Mih1p M-phase in   | YMR036c | orf19.3071  |
| CA3489 | IPF3195    | 1.0  | 1.1  | 1.1  | 1.1 | unknown function                                              |         | orf19.3567  |
| CA5157 | IPF993     | -1.0 | 1.1  | 1.2  | 1.1 | unknown function                                              |         | orf19.4595  |

|        |              |      |      |      |     |                                                                    |                            |             |
|--------|--------------|------|------|------|-----|--------------------------------------------------------------------|----------------------------|-------------|
| CA4514 | IPF20016     | -1.4 | 1.1  | 1.0  | 1.1 | similar to <i>Saccharomyces cerevisiae</i> Sec63p ER protein       | YOR254c                    | orf19.491   |
| CA1177 | VMA7         | 1.1  | 1.0  | 1.1  | 1.1 | vacuolar ATPase (by homology)                                      | YGR020c                    | orf19.806   |
| CA3089 | IPF9825      | -1.0 | 1.1  | 1.1  | 1.1 | unknown function                                                   | YLR253w                    |             |
| CA3746 | ARA1         | 1.1  | 1.2  | 1.2  | 1.1 | D-arabinose dehydrogenase (by homology)                            | YBR149w                    | orf19.2172  |
| CA2710 | IPF7403      | 1.1  | 1.1  | 1.2  | 1.1 | unknown function                                                   | YMR069w                    | orf19.4664  |
| CA2977 | HOM3         | -1.1 | 1.0  | 1.2  | 1.1 | Aspartokinase (by homology)                                        | YER052c                    | orf19.1235  |
| CA5580 | RVS161       | 1.1  | 1.0  | 1.0  | 1.1 | cytoskeletal binding protein (by homology)                         | YCR009c                    | orf19.7124  |
| CA0435 | UGP1         | -1.3 | 1.1  | 1.3  | 1.1 | UTP--glucose-1-phosphate uridylyltransferase (by homology)         | YKL035w                    | orf19.9305  |
| CA3095 | CDC28        | -1.1 | 1.0  | 1.1  | 1.1 | CELL DIVISION CONTROL PROTEIN 28 -protein kinase                   | YBR160w                    | orf19.3856  |
| CA0484 | IPF19622     | -1.0 | 1.1  | -1.0 | 1.1 | unknown function                                                   |                            | orf19.7762  |
| CA5303 | IPF2180      | 1.0  | 1.1  | 1.3  | 1.1 | unknown function                                                   |                            | orf19.7170  |
| CA2741 | IPF10632     | 1.0  | 1.2  | 1.2  | 1.1 | unknown function                                                   | YLR323c                    | orf19.2105  |
| CA5697 | IPF18076.3F  | 1.2  | 1.1  | 1.2  | 1.1 | thiol-specific antioxidant-like protein, 3-prime end (by homology) |                            |             |
| CA1832 | IPF17727     | 1.1  | -1.0 | 1.3  | 1.1 | unknown function                                                   |                            | orf19.5190  |
| CA5856 | ALK2         | 1.0  | 1.0  | 1.1  | 1.1 | n-alkane inducible cytochrome P-450 (by homology)                  |                            | orf19.7513  |
| CA1523 | PAT1         | -1.1 | 1.1  | 1.1  | 1.1 | Topoisomerase II-associated protein (by homology)                  | YCR077c                    | orf19.3792  |
| CA6166 | CTP1         | -1.0 | 1.0  | 1.2  | 1.1 | Citrate transport protein (by homology)                            | YBR291c                    | orf19.13291 |
| CA2425 | IPF9907      | 1.1  | 1.1  | 1.5  | 1.1 | similar to <i>Saccharomyces cerevisiae</i> Sed4 protein of the     | YCR067c                    | orf19.10912 |
| CA4726 | IPF12255     | 1.1  | 1.2  | 1.2  | 1.1 | unknown function                                                   | YDR084c                    | orf19.12326 |
| CA1632 | IPF10181     | 1.1  | 1.0  | 1.0  | 1.1 | similar to <i>Saccharomyces cerevisiae</i> Rsm26p protein of the   | YJR101w                    | orf19.11420 |
| CA4616 | IPF5761      | 1.0  | 1.1  | 1.2  | 1.1 | flavin-containing monooxygenase (by homology)                      | YHR176w                    | orf19.3307  |
| CA0851 | IPF16670     | -1.0 | 1.1  | 1.2  | 1.1 | unknown function                                                   | YOR242c                    | orf19.9313  |
| CA0602 | CTA22        | 1.2  | 1.1  | 1.1  | 1.1 | Protein with putative transcription activation domain              |                            | orf19.3074  |
| CA1359 | IPF11842     | 1.0  | 1.1  | 1.2  | 1.1 | unknown function                                                   |                            | orf19.4405  |
| CA0535 | IPF15606     | 1.1  | 1.1  | 1.2  | 1.1 | similar to <i>Saccharomyces cerevisiae</i> Erd1p required for      | YDR414c                    | orf19.5065  |
| CA0831 | PF10493.5EOC | -1.0 | 1.1  | 1.1  | 1.1 | unknown function, 5-prime end                                      |                            | orf19.7878  |
| CA0387 | PF10318.5EOC | -1.0 | 1.1  | 1.1  | 1.1 | unknown function, 5-prime end                                      |                            |             |
| CA1745 | IPF10888     | -1.0 | -1.0 | -1.0 | 1.1 | unknown function                                                   |                            | orf19.5051  |
| CA3706 | PSA2         | -1.0 | 1.2  | 1.2  | 1.1 | mannose-1-phosphate guanylyltransferase by homology                |                            | orf19.4943  |
| CA2543 | IPF16925     | 1.0  | 1.0  | 1.1  | 1.1 | unknown function                                                   | YNL148c                    | orf19.2828  |
| CA5713 | ALS6         | 1.0  | 1.0  | 1.0  | 1.1 | agglutinin-like protein                                            |                            | orf19.7414  |
| CA4056 | IPF7721      | -1.2 | 1.2  | 1.3  | 1.1 | unknown function                                                   |                            | orf19.431   |
| CA6102 | SPO70.5F     | -1.0 | -1.0 | 1.1  | 1.1 | involved in meiosis and sporulation, 5-prime end                   | YGR225w                    | orf19.5954  |
| CA1300 | SLY41        | 1.0  | -1.0 | 1.1  | 1.1 | vesicular transport (by homology)                                  | YOR307c                    | orf19.4199  |
| CA5974 | IPF930       | -1.0 | 1.0  | 1.1  | 1.1 | unknown function                                                   | YOR313c                    | orf19.7568  |
| CA3896 | IPF10339     | 1.1  | -1.2 | -1.1 | 1.1 | unknown function                                                   |                            | orf19.5077  |
| CA5715 | HNT2         | 1.1  | 1.1  | 1.2  | 1.1 | Diadenosine polyphosphate hydrolase                                | YDR305c                    | orf19.7419  |
| CA1669 | IPF11393     | 1.3  | -1.0 | -1.2 | 1.1 | unknown function                                                   | YBL090w                    | orf19.2852  |
| CA1433 | IPF12464     | 1.1  | 1.1  | 1.1  | 1.1 | unknown function                                                   |                            |             |
| CA2210 | MSL1         | -1.0 | 1.0  | 1.2  | 1.1 | U2 snRNA-associated protein (by homology)                          | YIR009w                    | orf19.4748  |
| CA0417 | UBC13        | 1.2  | 1.1  | 1.1  | 1.1 | E2 ubiquitin-conjugating enzyme (by homology)                      | YDR092w                    | orf19.2225  |
| CA2042 | IPF14219     | 1.0  | -1.0 | 1.1  | 1.1 | probable membrane protein (by homology)                            | YOL107w                    | orf19.10445 |
| CA5481 | IPF19810     | 1.2  | 1.1  | 1.3  | 1.1 | unknown function                                                   |                            | orf19.12773 |
| CA1132 | F2710.REPEAT | 1.3  | 1.0  | 1.5  | 1.1 | putative permease (by homology)                                    |                            | orf19.9705  |
| CA3208 | PSA1         | -1.0 | 1.2  | 1.2  | 1.1 | GDP-mannose pyrophosphorylase                                      | YDL055c ; Missing in array | orf19.6190  |
| CA3383 | IPF8359      | 1.0  | -1.0 | 1.0  | 1.1 | unknown function                                                   |                            | orf19.326   |
| CA2029 | SAR1.3       | 1.2  | 1.0  | 1.1  | 1.1 | GTP-binding protein of the ARF family, 3-prime end (by homology)   | YPL218w                    | orf19.10966 |
| CA2744 | IPF10626     | 1.1  | 1.0  | 1.1  | 1.1 | unknown function                                                   | YGL020c                    | orf19.2101  |
| CA1541 | BGL21        | 1.3  | 1.0  | 1.2  | 1.1 | endo-beta-1,3-glucanase (by homology)                              | YGR282c                    | orf19.4565  |



|        |             |      |      |      |     |                                                                                          |          |             |
|--------|-------------|------|------|------|-----|------------------------------------------------------------------------------------------|----------|-------------|
| CA0438 | STE4.5EOC   | -1.0 | 1.1  | 1.0  | 1.1 | GTP-binding protein beta subunit of the pheromone pat1                                   | YOR212w  | orf19.8419  |
| CA2120 | PUP3        | 1.0  | 1.1  | 1.2  | 1.1 | PRCT yeast proteasome component (by homology)                                            | YER094c  |             |
| CA5987 | CHT3        | 1.3  | 1.2  | 1.3  | 1.1 | chitinase 3 precursor                                                                    | YLR286c  | orf19.7586  |
| CA4952 | IPF13609    | 1.0  | -1.0 | 1.1  | 1.1 | unknown function                                                                         | YPL246c  | orf19.6526  |
| CA2084 | IPF3384.3F  | 1.2  | 1.1  | 1.3  | 1.1 | similar to <i>Saccharomyces cerevisiae</i> Gpi13p phosphoryltransferase that adds phosph |          | orf19.833   |
| CA5079 | RPN3        | -1.2 | 1.1  | 1.1  | 1.1 | 26S proteasome regulatory subunit (by homology)                                          | YER021w  | orf19.3054  |
| CA1801 | IPF11444    | 1.2  | 1.2  | 1.0  | 1.1 | unknown function                                                                         | YER007ca | orf19.2920  |
| CA1654 | IPF19660    | -1.1 | 1.1  | 1.3  | 1.1 | unknown function                                                                         | YDR202c  | orf19.5559  |
| CA4251 | IPF4291     | -1.0 | 1.1  | 1.1  | 1.1 | unknown function                                                                         |          | orf19.540   |
| CA1308 | IPF8642     | -1.0 | -1.0 | -1.0 | 1.1 | unknown function                                                                         |          | orf19.11450 |
| CA4776 | CNB1        | 1.1  | 1.1  | 1.0  | 1.1 | Protein phosphatase, Calcineurin B (by homology)                                         | YKL190w  | orf19.4009  |
| CA1865 | IPF7646     | -1.0 | 1.1  | 1.3  | 1.1 | putative transcription factor (by homology)                                              |          | orf19.861   |
| CA3690 | RPS14B      | 1.1  | 1.0  | -1.1 | 1.1 | ribosomal protein (by homology)                                                          | YJL191w  |             |
| CA5369 | WSC4        | 1.0  | 1.2  | 1.2  | 1.1 | Cell wall integrity by homology                                                          | YHL028w  | orf19.7251  |
| CA5893 | IPF2392     | 1.1  | 1.1  | 1.1  | 1.1 | unknown function                                                                         |          | orf19.6813  |
| CA2175 | IPF8892     | 1.0  | 1.1  | 1.1  | 1.1 | unknown function                                                                         |          | orf19.3762  |
| CA1416 | DBP2.EXON1  | 1.0  | 1.3  | 1.4  | 1.1 | ATP-dependent RNA helicase of DEAD box family, exo1                                      | YNL112w  | orf19.171   |
| CA2200 | IPF8114     | -1.0 | -1.0 | 1.0  | 1.1 | unknown function                                                                         | YFL046w  | orf19.2939  |
| CA1467 | IPF5082     | 1.0  | 1.2  | 1.2  | 1.1 | similar to <i>Saccharomyces cerevisiae</i> Cak1p cdk-activati                            | YFL029c  | orf19.8412  |
| CA1010 | GLT1.3EOC   | -1.0 | -1.1 | -1.1 | 1.1 | glutamate synthase (NAPDPH), 3-prime end (by homol                                       | YDL171c  | orf19.6257  |
| CA3424 | NOP10       | -1.0 | 1.1  | 1.1  | 1.1 | Nucleolar rRNA processing protein (by homology)                                          | YHR072wa |             |
| CA6003 | IPF660      | -1.0 | -1.0 | 1.0  | 1.1 | unknown function                                                                         | YMR244ca | orf19.7603  |
| CA3692 | IPF4876     | 1.1  | 1.0  | 1.1  | 1.1 | unknown function                                                                         |          | orf19.6267  |
| CA5255 | ACT1        | -1.1 | -1.0 | 1.1  | 1.1 | actin (by homology)                                                                      | YFL039c  | orf19.5007  |
| CA0952 | MNT3.3EOC   | 1.0  | 1.0  | 1.2  | 1.1 | Putative mannosyltransferase, 3-prime end                                                |          |             |
| CA0963 | IPF9143     | 1.0  | 1.1  | 1.1  | 1.1 | similar to <i>Saccharomyces cerevisiae</i> Nat3p N-acetyltrar                            | YPR131c  | orf19.6246  |
| CA5493 | GCN1.5F     | 1.1  | 1.5  | 1.2  | 1.1 | translational activator, 5-prime end (by homology)                                       | YGL195w  | orf19.5333  |
| CA2245 | IPF7409     | 1.0  | 1.0  | 1.1  | 1.1 | unknown function                                                                         |          | orf19.4668  |
| CA1734 | IPF4988     | 1.1  | 1.1  | 1.1  | 1.1 | unknown function                                                                         |          | orf19.2529  |
| CA5535 | IPF2839     | -1.0 | 1.0  | 1.2  | 1.1 | unknown function                                                                         |          | orf19.7296  |
| CA4800 | IPF8796     | -1.1 | 1.1  | 1.1  | 1.1 | putative GPI-anchored protein related to Phr1, Phr2 ar                                   | YOL030w  | orf19.4035  |
| CA2777 | THI6        | 1.0  | 1.1  | 1.0  | 1.1 | thiamin-phosphate pyrophosphorylase and hydroxyethy                                      | YPL214c  | orf19.277   |
| CA5767 | IPF1098     | 1.1  | 1.1  | -1.0 | 1.1 | unknown function                                                                         | YNL265c  | orf19.5409  |
| CA5448 | ARC19.EXON2 | 1.1  | 1.1  | 1.2  | 1.1 | subunit of the Arp2/3 complex involved in the control of                                 | YKL013c  | orf19.3251  |
| CA2806 | IPF11702    | 1.0  | -1.0 | 1.1  | 1.1 | unknown function                                                                         | YIL067c  | orf19.5780  |
| CA4512 | RPL15B      | 1.1  | -1.0 | -1.1 | 1.1 | ribosomal protein L15.e.c13 (by homology)                                                | YLR029c  | orf19.8123  |
| CA0926 | IPF11335    | -1.1 | -1.0 | 1.3  | 1.1 | Member of the phosphate permease                                                         | YNR013c  | orf19.3663  |
| CA2897 | IPF14979    | -1.2 | -1.0 | -1.0 | 1.1 | similar to <i>Saccharomyces cerevisiae</i> Npy1p NADH pyro                               | YGL067w  | orf19.3482  |
| CA5347 | IPF864      | 1.1  | 1.1  | 1.0  | 1.1 | unknown function                                                                         | YJL104w  | orf19.7222  |
| CA5186 | HRT2        | -1.0 | 1.1  | 1.2  | 1.1 | Similar to ScHRT2 (by homology)                                                          | YMR027w  | orf19.4624  |
| CA1860 | UTR4        | -1.0 | 1.0  | 1.1  | 1.1 | unknown function                                                                         | YEL038w  | orf19.9072  |
| CA1783 | IPF7635     | 1.0  | 1.0  | 1.0  | 1.1 | unknown function                                                                         |          | orf19.1171  |
| CA0385 | IPF4071     | -1.2 | 1.0  | -1.0 | 1.1 | unknown function                                                                         |          | orf19.1861  |
| CA1395 | IPF17558    | 1.1  | 1.0  | 1.1  | 1.1 | unknown function                                                                         |          | orf19.9332  |
| CA3963 | IPF11233    | -1.1 | 1.0  | 1.1  | 1.1 | similar to <i>Saccharomyces cerevisiae</i> Fzo1p required for                            | YBR179c  | orf19.1422  |
| CA4991 | LCB4        | -1.0 | 1.1  | 1.1  | 1.1 | Sphingolipid long chain base kinase (by homology)                                        | YOR171c  | orf19.5257  |
| CA2027 | MCK1        | 1.1  | 1.1  | 1.5  | 1.1 | ser/thr/tyr protein kinase (by homology)                                                 | YNL307c  | orf19.10963 |
| CA1117 | ARP3        | -1.1 | 1.2  | 1.1  | 1.1 | actin related protein (by homology)                                                      | YJR065c  | orf19.2289  |
| CA2780 | IPF3831     | 1.1  | 1.1  | 1.1  | 1.1 | unknown function                                                                         |          | orf19.281   |

|        |              |      |      |      |     |                                                                                    |                                |
|--------|--------------|------|------|------|-----|------------------------------------------------------------------------------------|--------------------------------|
| CA1729 | IPF8440      | -1.0 | 1.1  | 1.0  | 1.1 | similar to <i>Saccharomyces cerevisiae</i> Trs33p TRAPP su YOR115c                 | orf19.6496                     |
| CA2408 | IPF3833      | 1.0  | 1.0  | 1.0  | 1.1 | unknown function                                                                   | orf19.296                      |
| CA4934 | CDC36        | 1.1  | 1.1  | 1.0  | 1.1 | transcription factor (by homology)                                                 | YDL165w<br>orf19.6075          |
| CA2435 | IPF9483      | 1.1  | 1.1  | 1.2  | 1.1 | probable permease (by homology)                                                    | YHR048w<br>orf19.10898         |
| CA0695 | IPF12601     | 1.2  | 1.0  | -1.0 | 1.1 | unknown function                                                                   | orf19.3290                     |
| CA5039 | GAP2         | 1.0  | -1.0 | 1.2  | 1.1 | general amino acid permease (by homology)                                          | YKR039w<br>orf19.6993          |
| CA0410 | IPF15065     | 1.2  | 1.1  | 1.1  | 1.1 | unknown function                                                                   | YMR178w<br>orf19.13180         |
| CA0597 | IPF9704      | 1.1  | -1.0 | 1.0  | 1.1 | similar to <i>Saccharomyces cerevisiae</i> Tfa2p TFIIE subunit YKR062w             | orf19.12345                    |
| CA2330 | RIM2         | -1.0 | -1.1 | 1.2  | 1.1 | mitochondrial carrier protein (by homology)                                        | YBR192w<br>orf19.4499          |
| CA5989 | IPF692       | 1.1  | 1.0  | 1.2  | 1.1 | unknown function                                                                   | orf19.7589                     |
| CA1603 | FAD1         | 1.1  | 1.1  | 1.1  | 1.1 | flavin adenine dinucleotide (FAD) synthetase (by YDL045c                           | orf19.4723                     |
| CA5821 | PHO81        | -1.1 | 1.0  | 1.1  | 1.1 | Cyclin-dependent kinase inhibitor (by homology)                                    | YGR233c<br>orf19.7475          |
| CA1377 | IPF18690     | -1.3 | 1.6  | -1.2 | 1.1 | unknown function                                                                   | orf19.461                      |
| CA0279 | IPF10568     | 1.1  | 1.0  | 1.1  | 1.1 | unknown function                                                                   | orf19.1440                     |
| CA2795 | IPF8407      | -1.0 | 1.2  | 1.2  | 1.1 | unknown function                                                                   | YJL055w<br>orf19.1723          |
| CA3651 | MSS1         | -1.1 | -1.1 | -1.0 | 1.1 | Mitochondrial GTPase involved in expression of COX1 (YMR023c                       | orf19.2042                     |
| CA3842 | YKE2.3       | 1.1  | -1.1 | 1.1  | 1.1 | Gim complex component, 3-prime end (by homology)                                   | YLR200w                        |
| CA2434 | IPF9484      | 1.0  | 1.1  | 1.2  | 1.1 | unknown function                                                                   | orf19.3396                     |
| CA1975 | PLB1         | -1.0 | 1.1  | -1.0 | 1.1 | phospholipase B                                                                    | orf19.689                      |
| CA4230 | IPF12481     | -1.0 | -1.0 | -1.0 | 1.1 | unknown function                                                                   | orf19.513                      |
| CA5062 | SEC62        | 1.0  | 1.1  | 1.3  | 1.1 | subunit of ER protein-translocation complex (by homology)                          | YPL094c<br>orf19.3031          |
| CA4630 | IPF1537      | 1.0  | 1.1  | 1.1  | 1.1 | putative adrenodoxin and ferredoxin (by homology)                                  | YPL252c<br>orf19.336           |
| CA4994 | IPF2033      | 1.0  | 1.0  | 1.1  | 1.1 | unknown function                                                                   | orf19.5254                     |
| CA2429 | IPF9890      | 1.0  | 1.0  | 1.0  | 1.1 | unknown function                                                                   | orf19.3404                     |
| CA5049 | IPF3714      | -1.0 | 1.0  | 1.3  | 1.1 | similar to <i>Saccharomyces cerevisiae</i> Cdc12p septin (by YHR107c               | orf19.3013                     |
| CA1815 | IPF18606     | -1.0 | 1.1  | 1.1  | 1.1 | unknown function                                                                   | YBR040w<br>orf19.138           |
| CA3126 | GCN4         | -1.3 | -1.1 | -1.1 | 1.1 | transcriptional activator                                                          | YEL009c<br>orf19.1358          |
| CA5711 | MUB1         | 1.0  | -1.1 | -1.1 | 1.1 | Regulation of bud site selection (by homology)                                     | YMR100w<br>orf19.7412          |
| CA4422 | LIP9.EXON2   | 1.0  | 1.1  | 1.1  | 1.1 | secretory lipase 9, exon 2                                                         | orf19.5173                     |
| CA2539 | IPF9188      | -1.0 | 1.0  | 1.1  | 1.1 | unknown function                                                                   | orf19.3187                     |
| CA5231 | IPF10422     | 1.1  | 1.1  | 1.0  | 1.1 | Similar to APG12, component of the autophagic system                               | YBR217w<br>orf19.5033          |
| CA0917 | RAD16        | -1.0 | 1.1  | 1.3  | 1.1 | nucleotide excision repair protein (by homology)                                   | YBR114w<br>orf19.2969          |
| CA1511 | IPF9972.3EOC | 1.0  | 1.1  | 1.2  | 1.1 | unknown function, 3-prime end                                                      | YMR073c<br>orf19.4522          |
| CA4983 | IPF2053      | 1.1  | 1.2  | 1.2  | 1.1 | unknown function                                                                   | orf19.5267                     |
| CA3129 | OST4         | -1.0 | 1.0  | 1.1  | 1.1 | oligosaccharyltransferase subunit                                                  |                                |
| CA2902 | HRR25        | 1.1  | 1.0  | 1.1  | 1.1 | casein kinase I (by homology)                                                      | YPL204w<br>orf19.3476          |
| CA0549 | IPF14031     | -1.0 | 1.0  | 1.2  | 1.1 | putative secreted aspartic protease (by homology)                                  | orf19.852                      |
| CA0344 | IPF1.3EOC    | 1.1  | 1.2  | 1.2  | 1.1 | Unknown function, 3-prime end                                                      | Missing in array<br>orf19.1346 |
| CA4818 | IPF1193      | 1.3  | 1.2  | 1.3  | 1.1 | unknown function                                                                   | YHL018w<br>orf19.2079          |
| CA5320 | IPF2147      | 1.0  | 1.1  | -1.0 | 1.1 | unknown function                                                                   | orf19.7194                     |
| CA3544 | BPT1.3F      | 1.1  | 1.3  | 1.2  | 1.1 | membrane transporter of the ATP-binding cassette (ABC) superfamily, 3-prime end (t | orf19.6382                     |
| CA5373 | IPF5243      | 1.1  | 1.0  | 1.1  | 1.1 | snRNP (by homology)                                                                | YER146w<br>orf19.7256          |
| CA2059 | CDC4         | 1.1  | 1.3  | 1.2  | 1.1 | CANAL CELL DIVISION CONTROL PROTEIN 4                                              | YFL009w<br>orf19.2559          |
| CA2572 | IPF13766     | -1.1 | 1.2  | 1.3  | 1.1 | unknown function                                                                   | orf19.6211                     |
| CA2144 | IPF12802     | 1.0  | -1.0 | 1.1  | 1.1 | unknown function                                                                   | orf19.2513                     |
| CA4153 | DNLI         | -1.0 | -1.0 | 1.1  | 1.1 | CANAL DNA LIGASE (POLYDEOXYRIBONUCLEOTID)                                          | YOR005c<br>orf19.5798          |
| CA2361 | IPF8950      | -1.0 | 1.1  | 1.1  | 1.1 | unknown function                                                                   | YER004w<br>orf19.12363         |
| CA4706 | RAD53        | 1.0  | 1.0  | 1.0  | 1.1 | protein kinase                                                                     | YPL153c<br>orf19.6936          |
| CA5389 | IFA13        | -1.0 | 1.0  | 1.1  | 1.1 | unknown function                                                                   | orf19.931                      |

|        |              |      |      |      |     |                                                                                 |          |             |
|--------|--------------|------|------|------|-----|---------------------------------------------------------------------------------|----------|-------------|
| CA2611 | IPF5453      | -1.0 | 1.1  | 1.2  | 1.1 | unknown function                                                                |          | orf19.5692  |
| CA5720 | UNG1         | -1.0 | 1.0  | 1.1  | 1.1 | Uracil-DNA glycosylase (by homology)                                            | YML021c  | orf19.7425  |
| CA5585 | CSA1         | 1.1  | 1.1  | 1.0  | 1.1 | mycelial surface antigen by homology                                            |          | orf19.7114  |
| CA4867 | IPF4080      | -1.0 | 1.0  | -1.0 | 1.1 | similar to <i>Saccharomyces cerevisiae</i> Mrp8p ribosomal p                    | YKL142w  | orf19.3844  |
| CA3203 | IPF3445      | 1.1  | 1.1  | 1.2  | 1.1 | Unknown function                                                                | YJR135wa | orf19.6183  |
| CA0557 | HYR1.53      | 1.1  | 1.0  | 1.0  | 1.1 | Hyphally regulated protein, internal fragment                                   |          |             |
| CA3936 | COX17        | 1.0  | 1.1  | 1.1  | 1.1 | cysteine-rich cytoplasmic protein(by homology)                                  | YLL009c  |             |
| CA5672 | IPF1271      | -1.0 | 1.1  | 1.1  | 1.1 | Small nuclear ribonucleoprotein (by homology)                                   |          | orf19.7375  |
| CA4018 | MOG1         | -1.0 | 1.0  | -1.1 | 1.1 | Ran-Binding Protein by homology                                                 | YJR074w  | orf19.3446  |
| CA0538 | IPF10901     | 1.0  | 1.1  | 1.1  | 1.1 | unknown function                                                                |          | orf19.2819  |
| CA6146 | IPF1863      | 1.1  | -1.0 | 1.1  | 1.1 | unknown function                                                                | YMR244w  | orf19.5896  |
| CA4222 | GCD7         | 1.1  | 1.1  | 1.2  | 1.1 | translation initiation factor eIF2b subunit (by homology)                       | YLR291c  | orf19.825   |
| CA5295 | IPF1954      | 1.0  | 1.0  | 1.1  | 1.1 | putative transporter (by homology)                                              |          | orf19.7158  |
| CA3157 | IPF14456     | 1.0  | 1.1  | 1.0  | 1.1 | unknown function                                                                | YBR269c  | orf19.1588  |
| CA5282 | IPF1911      | 1.1  | 1.0  | 1.1  | 1.1 | unknown function                                                                |          | orf19.7139  |
| CA3610 | IPF3854      | 1.0  | 1.1  | 1.0  | 1.1 | unknown function                                                                |          | orf19.27    |
| CA1963 | IPF14040     | 1.1  | 1.3  | 1.6  | 1.1 | probable transporter (by homology)                                              |          | orf19.2397  |
| CA5195 | GRP8         | -1.0 | -1.0 | 1.0  | 1.1 | Similarity to dihydroflavonol-4-reductases                                      |          | orf19.7009  |
| CA4985 | IPF2050      | 1.1  | 1.0  | 1.1  | 1.1 | similar to <i>Saccharomyces cerevisiae</i> Kip1p kinesin-relat                  | YBL063w  | orf19.5265  |
| CA2477 | IPF16016     | -1.1 | 1.2  | 1.1  | 1.1 | unknown function                                                                |          | orf19.10399 |
| CA5824 | NTH1         | -1.1 | -1.0 | 1.4  | 1.1 | Neutral trehalase                                                               | YDR001c  | orf19.7479  |
| CA1872 | IPF6700      | 1.0  | 1.0  | 1.0  | 1.1 | unknown function                                                                |          | orf19.2459  |
| CA2389 | IPF8500      | -1.0 | 1.1  | 1.0  | 1.1 | unknown function                                                                |          | orf19.2610  |
| CA1934 | YAP1802.3EOC | 1.1  | 1.2  | 1.1  | 1.1 | cytoskeletal adaptor, member of AP180 protein family, 3-prime end (by homology) |          |             |
| CA3640 | VPS24        | -1.0 | 1.0  | 1.0  | 1.1 | endosomal Vps protein complex subunit                                           | YKL041w  | orf19.2031  |
| CA3600 | SPC3         | 1.1  | 1.1  | 1.2  | 1.1 | signal peptidase subunit (by homology)                                          | YLR066w  | orf19.4930  |
| CA3635 | IFA20        | -1.0 | 1.1  | 1.3  | 1.1 | unknown function                                                                |          | orf19.5139  |
| CA2213 | IPF16405     | -1.0 | -1.3 | -1.1 | 1.1 | similar to <i>saccharomyces cerevisiae</i> Rsm25p protein of                    | YIL093c  | orf19.4751  |
| CA4304 | IPF6649      | -1.0 | -1.0 | 1.1  | 1.1 | unknown function                                                                |          | orf19.6704  |
| CA4240 | NHP2         | 1.1  | 1.1  | 1.1  | 1.1 | nucleolar rRNA processing protein (by homology)                                 | YDL208w  | orf19.526   |
| CA5364 | DCD1         | 1.1  | 1.0  | 1.0  | 1.1 | deoxycytidylate deaminase (by homology)                                         | YHR144c  | orf19.7243  |
| CA5312 | IPF2165      | 1.1  | 1.0  | 1.1  | 1.1 | unknown function                                                                | YGL231c  | orf19.7183  |
| CA1922 | DIP52        | 1.1  | 1.1  | 1.1  | 1.1 | Dicarboxylic amino acid permease (by homology)                                  |          | orf19.2445  |
| CA0853 | IPF19640     | -1.0 | 1.1  | 1.1  | 1.1 | unknown function                                                                |          | orf19.9316  |
| CA4104 | IPF20157     | -1.0 | 1.0  | 1.0  | 1.1 | unknown function                                                                | YNL279w  | orf19.669   |
| CA2070 | IPF6971.3    | 1.1  | -1.0 | -1.1 | 1.1 | unknown function, 3-prime end                                                   |          |             |
| CA5268 | SEC18.3F     | -1.0 | -1.1 | -1.0 | 1.1 | vesicular fusion protein, 3-prime end (by homology)                             | YBR080c  | orf19.4994  |
| CA3325 | IPF6890      | 1.0  | -1.0 | 1.0  | 1.1 | unknown function                                                                |          | orf19.2674  |
| CA0804 | BNA1         | 1.0  | 1.1  | 1.1  | 1.1 | 3-hydroxyanthranilic acid dioxygenase (by homology)                             | YJR025c  | orf19.3515  |
| CA0055 | IPF12442     | 1.1  | 1.2  | 1.3  | 1.1 | unknown function                                                                | YML052w  | orf19.10917 |
| CA3862 | NSR1         | 1.2  | 1.1  | 1.1  | 1.1 | nuclear localization sequence binding protein (by homol                         | YGR159c  | orf19.6090  |
| CA3777 | IPF10432     | 1.0  | 1.1  | 1.0  | 1.1 | unknown function                                                                | YEL044w  | orf19.2889  |
| CA0836 | IPF12495.5F  | -1.0 | -1.1 | 1.0  | 1.1 | unknown function, 5-prime end                                                   |          | orf19.9248  |
| CA4855 | IPF5830      | -1.0 | -1.0 | -1.0 | 1.1 | unknown function                                                                |          | orf19.3826  |
| CA3314 | IPF8812      | -1.0 | 1.0  | 1.0  | 1.1 | unknown function                                                                | YGR075c  | orf19.2303  |
| CA4384 | DUR34        | -1.0 | 1.0  | 1.1  | 1.1 | Urea transport protein (by homology)                                            |          | orf19.13122 |
| CA2838 | IPF8339      | 1.1  | 1.1  | 1.0  | 1.1 | unknown function                                                                |          | orf19.4791  |
| CA1165 | IPF19902     | -1.1 | 1.1  | 1.1  | 1.1 | unknown function                                                                |          | orf19.10868 |
| CA3564 | IPF7817      | -1.0 | -1.0 | 1.0  | 1.1 | putative NADH-dependent flavin oxidoreductase (by homology)                     |          | orf19.3131  |

|        |              |      |      |      |     |                                                                                 |             |
|--------|--------------|------|------|------|-----|---------------------------------------------------------------------------------|-------------|
| CA0023 | IPF6922      | 1.1  | 1.1  | 1.0  | 1.1 | unknown function                                                                | orf19.3788  |
| CA3521 | IFA15        | 1.0  | 1.1  | -1.0 | 1.1 | unknown function                                                                | orf19.996   |
| CA3889 | TAD3         | 1.1  | 1.0  | -1.0 | 1.1 | tRNA-specific adenosine-34 deaminase subunit (by hon                            | orf19.5090  |
| CA5122 | IPF1308      | -1.0 | -1.0 | -1.1 | 1.1 | Similarity to ribosomal protein S13 (by homology)                               | orf19.6406  |
| CA5807 | RPS24        | 1.3  | 1.2  | -1.1 | 1.1 | ribosomal protein S24.e                                                         | orf19.5466  |
| CA2275 | BIO4         | 1.1  | 1.1  | -1.0 | 1.1 | dethiobiotin synthetase (by homology)                                           | orf19.2590  |
| CA0371 | IPF19578     | -1.0 | -1.0 | -1.0 | 1.1 | unknown function                                                                | orf19.1087  |
| CA1756 | IPF14562     | -1.0 | -1.0 | 1.0  | 1.1 | unknown function                                                                | orf19.5129  |
| CA1595 | IPF9544      | 1.2  | 1.0  | 1.2  | 1.1 | unknown function                                                                | orf19.7905  |
| CA2724 | RPB7         | 1.3  | 1.1  | 1.2  | 1.1 | DNA-directed RNA polymerase II,19KD subunit (by hon                             | orf19.10855 |
| CA0259 | SOL1         | -1.2 | -1.0 | -1.0 | 1.1 | multicopy suppressor of los1-1                                                  | orf19.1355  |
| CA2864 | IPF17234.3   | 1.1  | 1.0  | 1.1  | 1.1 | unknown function, 3-prime end                                                   | orf19.1057  |
| CA4734 | TFA1         | -1.0 | -1.0 | -1.1 | 1.1 | Large subunit of transcription factor tfIIIE                                    | orf19.4851  |
| CA0683 | IPF14519     | -1.0 | 1.0  | 1.0  | 1.1 | unknown function                                                                | orf19.12172 |
| CA0949 | IPF10269     | 1.1  | 1.1  | 1.1  | 1.1 | Gim complex component-like by homology                                          | orf19.8859  |
| CA1338 | IPF5333      | 1.0  | 1.0  | 1.0  | 1.1 | unknown function                                                                | orf19.10953 |
| CA0246 | =14452.REPEA | 1.1  | 1.1  | 1.2  | 1.1 | F1-ATPase epsilon subunit (by homology)                                         |             |
| CA3051 | IPF13043     | 1.0  | -1.0 | 1.1  | 1.1 | unknown function                                                                | orf19.2408  |
| CA5822 | YRB1         | -1.0 | -1.1 | -1.1 | 1.1 | GTPase-activating protein (by homology)                                         | orf19.7477  |
| CA4902 | SED5         | 1.0  | -1.0 | -1.1 | 1.1 | Syntaxin (by homology)                                                          | orf19.6039  |
| CA2083 | IPF3384.5F   | 1.2  | 1.2  | 1.3  | 1.1 | similar to Saccharomyces cerevisiae Gpi13p phosphory                            | orf19.832   |
| CA4142 | PRE4         | -1.0 | 1.1  | 1.1  | 1.1 | 20S proteasome subunit(beta7) (by homology)                                     | orf19.11705 |
| CA5074 | IPF3607      | 1.0  | 1.1  | -1.0 | 1.1 | putative serine/threonine protein kinase                                        | orf19.3049  |
| CA1913 | ARC35        | -1.2 | -1.0 | -1.1 | 1.1 | subunit of the Arp2/3 complex involved in the control of                        | orf19.2437  |
| CA4064 | RPT1         | -1.1 | 1.1  | 1.1  | 1.1 | 26S PROTEASE REGULATORY SUBUNIT 7 (by homo                                      | orf19.441   |
| CA1752 | UBP14        | -1.2 | 1.1  | -1.0 | 1.1 | Ubiquitin-specific protease (by homology)                                       | orf19.1516  |
| CA2104 | IPF19939     | 1.1  | 1.0  | -1.0 | 1.1 | unknown function                                                                | orf19.9917  |
| CA4689 | IPF9020      | 1.0  | 1.2  | 1.1  | 1.1 | unknown function                                                                | orf19.8495  |
| CA2526 | SEC20        | -1.0 | 1.1  | 1.1  | 1.1 | secretory pathway protein                                                       | orf19.5526  |
| CA5308 | PRE5         | 1.1  | 1.1  | 1.0  | 1.1 | 20S proteasome subunit alpha6 (by homology)                                     | orf19.7178  |
| CA3235 | SNF8         | -1.0 | 1.1  | 1.1  | 1.1 | involved in glucose derepression (by homology)                                  | orf19.6296  |
| CA0866 | IPF14775     | 1.0  | 1.0  | -1.0 | 1.1 | unknown function                                                                | orf19.3585  |
| CA2914 | IFA17.5F     | -1.1 | 1.0  | 1.0  | 1.1 | unknown function, 5-prime end                                                   | orf19.4512  |
| CA1131 | NAG2         | 1.0  | 1.1  | 1.2  | 1.1 | N-acetyl-glucosamine-6-phosphate deacetylase                                    | orf19.9704  |
| CA4004 | IPF4256      | -1.0 | -1.1 | -1.1 | 1.1 | unknown function                                                                | orf19.1632  |
| CA4250 | IPF4292      | -1.0 | 1.0  | 1.0  | 1.1 | bleomycin Hydrolase                                                             | orf19.539   |
| CA1389 | PLP2         | -1.1 | -1.1 | 1.2  | 1.1 | Might regulate Ste4p in pheromone response (by homc                             | orf19.9338  |
| CA0540 | IPF10896     | 1.1  | 1.0  | 1.1  | 1.1 | NADH dehydrogenase (ubiquinone) (EC 1.6.5.3) 22K chain precursor (by homology)  | orf19.2821  |
| CA4187 | IPF7524      | 1.0  | 1.0  | 1.0  | 1.1 | unknown function                                                                | orf19.12003 |
| CA0118 | IPF16430.3   | 1.1  | -1.1 | -1.0 | 1.1 | similar to Saccharomyces cerevisiae Qcr6p ubiquinol-cy                          |             |
| CA1048 | IPF15394     | 1.1  | -1.0 | 1.0  | 1.1 | unknown function                                                                | orf19.3899  |
| CA4545 | SSL1         | -1.0 | -1.0 | 1.1  | 1.1 | TFIIH subunit (transcription initiation factor), factor B                       | orf19.1457  |
| CA4938 | IPF5166      | -1.0 | 1.1  | 1.0  | 1.1 | unknown function                                                                | orf19.6537  |
| CA4641 | IPF1505      | 1.0  | 1.1  | 1.2  | 1.1 | similar to saccharomyces cerevisiae Kre6p glucan synthase subunit (by homology) | orf19.348   |
| CA3841 | IPF16640     | 1.0  | 1.1  | 1.0  | 1.1 | unknown function                                                                | orf19.6601  |
| CA3829 | PPQ1         | 1.1  | -1.0 | 1.1  | 1.1 | phosphoprotein phosphatase (by homology)                                        | orf19.5758  |
| CA4756 | LIP6         | -1.0 | 1.1  | 1.2  | 1.1 | Secretory lipase                                                                | orf19.4823  |
| CA1190 | CIP1         | 1.1  | 1.1  | 1.1  | 1.1 | Cadmium induced protein (by homology)                                           | orf19.7761  |
| CA4654 | IPF3101      | -1.0 | -1.0 | -1.0 | 1.1 | unknown function                                                                | orf19.4441  |

|        |             |      |      |      |     |                                                                                        |          |             |
|--------|-------------|------|------|------|-----|----------------------------------------------------------------------------------------|----------|-------------|
| CA0172 | IPF19154    | -1.0 | 1.0  | -1.0 | 1.1 | unknown function                                                                       |          | orf19.1126  |
| CA2205 | SEO2        | 1.0  | 1.0  | 1.0  | 1.1 | suppressor of sulfoxide ethionine resistance                                           | YAL067c  | orf19.8319  |
| CA1250 | IPF9626     | 1.0  | 1.1  | 1.1  | 1.1 | unknown function                                                                       |          | orf19.12424 |
| CA4149 | SMP3        | 1.0  | 1.1  | 1.1  | 1.1 | Protein kinase C pathway protein                                                       | YOR149c  | orf19.5792  |
| CA0075 | IFA24.3     | 1.0  | 1.0  | 1.0  | 1.1 | unknown function, 3-prime end                                                          |          | orf19.9164  |
| CA3784 | IPF11229    | 1.0  | -1.1 | -1.1 | 1.1 | similar to <i>Saccharomyces cerevisiae</i> Rrp7p involved in                           | YCL031c  | orf19.5835  |
| CA4499 | IPF11316    | -1.1 | -1.0 | 1.1  | 1.1 | unknown function                                                                       | YNL129w  | orf19.511   |
| CA0459 | HOL3        | -1.0 | -1.0 | -1.0 | 1.1 | member of major facilitator superfamily multidrug-resistance protein subfamily 1 (by h |          | orf19.2517  |
| CA0788 | IPF14107    | 1.1  | 1.1  | 1.0  | 1.1 | unknown function                                                                       |          | orf19.9985  |
| CA3747 | IPF10153    | 1.5  | 1.3  | 1.2  | 1.1 | membrane transporter by homology                                                       | YOL084w  | orf19.2170  |
| CA0550 | IPF14030    | 1.0  | 1.0  | 1.1  | 1.1 | unknown function                                                                       |          | orf19.851   |
| CA5573 | IPF2005     | 1.1  | 1.1  | 1.2  | 1.1 | unknown function                                                                       |          |             |
| CA3793 | IPF5701     | 1.1  | 1.0  | 1.1  | 1.1 | unknown function                                                                       | YER074wa |             |
| CA3225 | IPF9329     | 1.0  | 1.0  | 1.0  | 1.1 | unknown function                                                                       | YER128w  | orf19.6286  |
| CA4990 | IPF2039     | 1.0  | 1.1  | 1.1  | 1.1 | unknown function                                                                       |          | orf19.5258  |
| CA4719 | DAL51       | 1.0  | 1.1  | 1.2  | 1.1 | allantoate permease (by homology)                                                      | YJR152w  | orf19.6956  |
| CA3013 | PET117      | 1.0  | 1.0  | 1.1  | 1.1 | cytochrome c oxidase assembly factor (by homology)                                     | YER058w  |             |
| CA1634 | IPF10179    | 1.1  | 1.0  | 1.0  | 1.1 | unknown function                                                                       | YJR088c  | orf19.11421 |
| CA1584 | IPF15824    | 1.0  | -1.0 | 1.0  | 1.1 | unknown function                                                                       |          | orf19.6030  |
| CA3786 | UFD1        | -1.1 | 1.2  | 1.1  | 1.1 | Ubiquitin fusion degradation protein (by homology)                                     | YGR048w  | orf19.5833  |
| CA5205 | KEX1        | -1.2 | 1.1  | -1.0 | 1.1 | Carboxypeptidase-alpha (by homology)                                                   | YGL203c  | orf19.7020  |
| CA1149 | MET223      | 1.0  | 1.0  | -1.0 | 1.1 | protein ser/thr phosphatase (by homology)                                              |          | orf19.99    |
| CA3139 | YHB3        | -1.0 | 1.2  | 1.1  | 1.1 | flavo-hemoglobin (by homology)                                                         |          | orf19.3710  |
| CA1365 | IPF11849    | 1.0  | 1.1  | 1.0  | 1.1 | unknown function                                                                       | YNL234w  | orf19.4459  |
| CA2558 | RBT5        | 1.1  | 1.1  | 1.1  | 1.1 | repressed by TUP1 protein 5                                                            |          | orf19.5636  |
| CA1331 | IPF11714    | 1.1  | 1.1  | 1.2  | 1.1 | unknown function                                                                       |          |             |
| CA1148 | CAN1        | 1.0  | 1.0  | 1.1  | 1.1 | amino acid permease (by homology)                                                      |          | orf19.97    |
| CA6041 | RPO21       | 1.0  | -1.0 | -1.0 | 1.1 | DNA-directed RNA polymerase II, 215 KD subunit (by h                                   | YDL140c  | orf19.7655  |
| CA1651 | RNH1.EXON2  | 1.1  | 1.2  | 1.2  | 1.1 | Ribonuclease H, exon 2 (by homology)                                                   |          | orf19.5564  |
| CA5603 | IPF553      | -1.0 | 1.1  | 1.1  | 1.1 | unknown function                                                                       | YLR001c  | orf19.7096  |
| CA2068 | ARP1        | 1.1  | 1.0  | 1.1  | 1.1 | centractin (by homology)                                                               | YHR129c  | orf19.2641  |
| CA5769 | UBC12       | -1.0 | 1.0  | -1.1 | 1.1 | E2 ubiquitin-conjugating enzyme (by homology)                                          | YLR306w  | orf19.5411  |
| CA2363 | IPF10590    | 1.0  | 1.1  | -1.0 | 1.1 | unknown function                                                                       | YPR091c  | orf19.1285  |
| CA5018 | IPF7558     | -1.0 | 1.0  | 1.0  | 1.1 | unknown function                                                                       | YGR227w  | orf19.6971  |
| CA3938 | IPF4764     | 1.1  | 1.2  | 1.1  | 1.1 | unknown Function                                                                       | YDR028c  | orf19.9556  |
| CA3873 | IPF8825     | 1.0  | 1.0  | -1.0 | 1.1 | unknown function                                                                       | YJR082c  | orf19.396   |
| CA6036 | IPF585      | 1.1  | -1.0 | 1.0  | 1.1 | unknown function                                                                       | YHR034c  | orf19.7646  |
| CA3082 | IPF11627    | -1.0 | -1.0 | 1.0  | 1.1 | unknown function                                                                       |          | orf19.11627 |
| CA3257 | IFC1        | -1.0 | 1.0  | 1.0  | 1.1 | Unknown Function                                                                       |          | orf19.3746  |
| CA2836 | ARG5,6      | 1.0  | 1.1  | 1.2  | 1.1 | acetylglutamate kinase and acetylglutamyl-phosphate re                                 | YER069w  | orf19.4788  |
| CA1417 | IPF16126    | 1.2  | 1.1  | 1.4  | 1.1 | similar to <i>Saccharomyces cerevisiae</i> Rpc19p DNA-direc                            | YNL113w  | orf19.172   |
| CA3391 | PNP1        | 1.0  | -1.0 | 1.0  | 1.1 | Purine Nucleoside Phosphorylase (by homology)                                          | YLR209c  | orf19.7949  |
| CA5399 | KRE62.5F    | -1.0 | 1.0  | 1.0  | 1.1 | Glucan synthase subunit, 5-prime end (by homology)                                     |          | orf19.942   |
| CA2599 | IPF11176    | -1.0 | -1.0 | 1.2  | 1.1 | similar to <i>Saccharomyces cerevisiae</i> Mmt2p mitochondi                            | YPL224c  | orf19.52    |
| CA0544 | IPF3252     | 1.0  | 1.1  | 1.0  | 1.1 | unknown function                                                                       |          | orf19.2868  |
| CA2784 | IPF3810     | 1.2  | -1.0 | 1.1  | 1.1 | unknown function                                                                       |          | orf19.287   |
| CA0106 | IPF16308    | 1.1  | 1.0  | 1.1  | 1.1 | unknown function                                                                       |          | orf19.11332 |
| CA0850 | IPF16671    | 1.1  | 1.0  | 1.2  | 1.1 | unknown function                                                                       |          | orf19.9312  |
| CA2677 | ATP14.EXON2 | 1.3  | -1.0 | -1.0 | 1.1 | F1F0-ATPase complex, subunit h, exon 2 (by homology)                                   | YLR295c  |             |



|        |             |      |      |      |     |                                                                         |          |             |
|--------|-------------|------|------|------|-----|-------------------------------------------------------------------------|----------|-------------|
| CA1851 | SAP155      | -1.0 | 1.0  | 1.1  | 1.1 | Cell cycle protein, interacts with Sit4 (by homology)                   |          | orf19.642   |
| CA4118 | IPF11952    | -1.3 | -1.0 | -1.3 | 1.1 | similar to <i>Saccharomyces cerevisiae</i> Hos3p putative his           | YPL116w  | orf19.2772  |
| CA5552 | IPF5971     | -1.0 | 1.1  | 1.1  | 1.1 | unknown function                                                        |          | orf19.7316  |
| CA2618 | SNG2        | 1.0  | 1.1  | 1.1  | 1.1 | drug transporter (by homology)                                          |          | orf19.2812  |
| CA1741 | IPF12213    | -1.0 | -1.0 | -1.1 | 1.1 | unknown function                                                        |          | orf19.5057  |
| CA1925 | IPF18587    | 1.1  | -1.0 | 1.0  | 1.1 | putative methyltransferase (by homology)                                |          | orf19.8372  |
| CA2258 | IFR1        | 1.1  | 1.0  | 1.1  | 1.1 | Unknown function                                                        |          | orf19.1763  |
| CA3078 | IPF19970    | 1.1  | 1.1  | 1.2  | 1.1 | unknown function                                                        | YMR209c  | orf19.4816  |
| CA3108 | IPF11826    | 1.1  | 1.1  | 1.1  | 1.1 | unknown function                                                        | YOR228c  | orf19.6550  |
| CA1816 | IPF7020     | 1.0  | 1.1  | 1.3  | 1.1 | unknown function                                                        | YBR043c  | orf19.136   |
| CA5408 | IPF1551     | 1.0  | 1.0  | 1.0  | 1.1 | unknown function                                                        |          | orf19.952   |
| CA0989 | IPF11069    | 1.0  | 1.0  | 1.1  | 1.1 | unknown function                                                        |          | orf19.1391  |
| CA4753 | IDH1.3      | -1.1 | 1.0  | -1.1 | 1.1 | isocitrate dehydrogenase (NAD+) subunit1, mitochondri                   | YNL037c  | orf19.4826  |
| CA4825 | IPF1205     | -1.0 | 1.0  | 1.1  | 1.1 | unknown function                                                        |          | orf19.2071  |
| CA1653 | STE23       | -1.4 | 1.0  | -1.2 | 1.1 | protease involved in a-factor processing by homology                    | YLR389c  | orf19.5561  |
| CA4448 | PHO85       | 1.1  | 1.1  | 1.2  | 1.1 | Negative regulator of PHO system                                        | YPL031c  | orf19.6846  |
| CA1660 | DAP2        | -1.0 | -1.0 | 1.1  | 1.1 | dipeptidyl aminopeptidase B (by homology)                               | YHR028c  | orf19.4322  |
| CA3123 | RPL6.3      | 1.4  | 1.1  | 1.0  | 1.1 | ribosomal protein, 3-prime end                                          | YLR448w  |             |
| CA4020 | IPF5324     | -1.0 | 1.1  | -1.0 | 1.1 | putative transporter (by homology)                                      |          | orf19.3444  |
| CA0360 | IPF2328     | 1.0  | 1.0  | 1.0  | 1.1 | unknown function                                                        |          | orf19.8720  |
| CA6142 | IPF1879     | 1.1  | -1.0 | 1.3  | 1.1 | unknown function                                                        | YOR301w  | orf19.5903  |
| CA0711 | VMA5        | -1.4 | 1.1  | -1.1 | 1.1 | H+-ATPase V1 domain 42 KD subunit (by homology)                         | YKL080w  | orf19.9712  |
| CA4881 | IPF1652     | 1.0  | 1.0  | 1.1  | 1.1 | putative purine nucleoside permease (by homology)                       |          | orf19.6569  |
| CA1494 | IPF171      | -1.0 | -1.0 | 1.2  | 1.1 | unknown function                                                        | YER113c  | orf19.3228  |
| CA4306 | GYP7        | -1.0 | 1.1  | 1.0  | 1.1 | GTPase activating protein (by homology)                                 | YDL234c  | orf19.6706  |
| CA0226 | IPF16024    | 1.1  | 1.0  | 1.1  | 1.1 | unknown function                                                        |          | orf19.1297  |
| CA5555 | SUC1        | -1.0 | 1.0  | 1.0  | 1.1 | Putative zinc finger protein Suc1                                       | YFL052w  | orf19.7319  |
| CA3198 | IPF3432     | 1.1  | 1.0  | 1.1  | 1.1 | Unknown function                                                        |          | orf19.6177  |
| CA5812 | IPF2690.3F  | 1.0  | 1.1  | 1.2  | 1.1 | unknown function, 3-prime end                                           |          | orf19.5474  |
| CA4619 | IPF5756     | -1.1 | -1.0 | -1.0 | 1.1 | unknown function                                                        |          | orf19.3310  |
| CA2553 | IPF9096     | 1.1  | -1.0 | -1.0 | 1.1 | probable mannosidase (by homology)                                      |          | orf19.2838  |
| CA2081 | IPF9699     | 1.0  | -1.0 | -1.0 | 1.1 | unknown function                                                        | YIR003w  | orf19.4878  |
| CA1158 | IPF13275    | -1.2 | 1.1  | 1.0  | 1.1 | unknown function                                                        | YHR016c  | orf19.4127  |
| CA3965 | IPF9375     | -1.0 | 1.1  | -1.0 | 1.1 | unknown function                                                        |          | orf19.1426  |
| CA3549 | ARC40       | 1.1  | -1.1 | 1.1  | 1.1 | subunit of the Arp2/3 complex involved in the control of                | YBR234c  | orf19.3873  |
| CA2044 | IPF10668    | 1.0  | 1.0  | -1.0 | 1.1 | unknown function                                                        | YGR054w  | orf19.10447 |
| CA1206 | HUB1        | -1.1 | -1.0 | 1.0  | 1.1 | Ubiquitin-like modifier (by homology)                                   | YNR032ca |             |
| CA3696 | IPF4868     | -1.1 | -1.1 | -1.0 | 1.1 | unknown function                                                        | YPR045c  | orf19.13650 |
| CA3709 | IPF7880     | -1.4 | 1.1  | -1.1 | 1.1 | unknown function                                                        | YNL297c  | orf19.4939  |
| CA4438 | IPF13866    | 1.2  | -1.0 | 1.1  | 1.1 | unknown function                                                        |          | orf19.5157  |
| CA5953 | IPF3506     | 1.0  | 1.1  | 1.1  | 1.1 | unknown function                                                        |          | orf19.6741  |
| CA2000 | IPF11796    | 1.0  | 1.1  | 1.1  | 1.1 | unknown function                                                        | YJL021c  | orf19.2791  |
| CA3642 | IPF4123     | -1.1 | 1.0  | 1.1  | 1.1 | unknown function                                                        |          | orf19.2033  |
| CA2578 | MMD1.3      | 1.6  | -1.1 | -1.2 | 1.1 | Maintenance of mitochondrial DNA, 3-prime end (by ho                    | YIL051c  |             |
| CA0803 | IFL4        | 1.1  | 1.0  | 1.0  | 1.1 | unknown function                                                        |          | orf19.3512  |
| CA1687 | IPF12275    | -1.1 | 1.1  | 1.2  | 1.1 | unknown function                                                        | YER140w  | orf19.3658  |
| CA5924 | IPF2822     | 1.1  | 1.1  | 1.1  | 1.1 | unknown function                                                        |          | orf19.6781  |
| CA0654 | IPF11550.3F | 1.0  | -1.1 | 1.0  | 1.1 | Ca <sup>2+</sup> -transporting P-type ATPase, 3-prime end (by homology) |          | orf19.10084 |
| CA0276 | IPF15015    | 1.1  | 1.0  | 1.0  | 1.1 | unknown function                                                        |          | orf19.13055 |

|        |              |      |      |      |     |                                                                                          |                            |             |
|--------|--------------|------|------|------|-----|------------------------------------------------------------------------------------------|----------------------------|-------------|
| CA6081 | IPF24        | 1.0  | 1.1  | 1.1  | 1.1 | reductase (by homology)                                                                  |                            | orf19.5978  |
| CA1773 | VRP1         | 1.1  | 1.2  | 1.3  | 1.1 | verprolin (by homology)                                                                  | YLR337c                    | orf19.2190  |
| CA1868 | PF14501.3EOC | -1.0 | 1.0  | -1.1 | 1.1 | putative G-protein, -transducin type, 3-prime end (by ho                                 | YBR281c                    | orf19.9992  |
| CA5379 | IPF5228.5    | 1.0  | 1.0  | 1.1  | 1.1 | similar to <i>Saccharomyces cerevisiae</i> Sad1p snRNP ass                               | YFR005c                    | orf19.7265  |
| CA5304 | IPF2178      | -1.0 | 1.0  | 1.0  | 1.1 | unknown function                                                                         |                            | orf19.7173  |
| CA0910 | MRPL16       | 1.3  | -1.0 | -1.1 | 1.1 | ribosomal protein                                                                        | YBL038w                    | orf19.9569  |
| CA5310 | IPF2167      | -1.1 | 1.0  | -1.0 | 1.1 | unknown function                                                                         |                            | orf19.7181  |
| CA1187 | QRI7         | 1.0  | 1.1  | 1.1  | 1.1 | putative glycoprotease (by homology)                                                     | YKR038c                    | orf19.11267 |
| CA0308 | RHK1         | 1.0  | -1.0 | 1.0  | 1.1 | Mannosyltransferase (by homology)                                                        | YBL082c                    | orf19.8693  |
| CA3783 | IPF11226     | 1.0  | 1.0  | 1.0  | 1.1 | unknown function                                                                         | YMR289w                    | orf19.5837  |
| CA5140 | TIM10        | 1.2  | 1.2  | 1.1  | 1.1 | Subunit of the Tim22-complex (by homology)                                               | YHR004ca                   |             |
| CA0369 | IPF13675     | 1.0  | 1.0  | 1.0  | 1.1 | unknown function                                                                         |                            | orf19.1656  |
| CA4698 | CDC25        | 1.1  | 1.0  | 1.2  | 1.1 | cell division cycle protein                                                              | YLR310c                    | orf19.6926  |
| CA1007 | DLH1.3F      | -1.0 | 1.0  | 1.1  | 1.1 | meiotic recombination protein, 3-prime end                                               | YER179w                    | orf19.3760  |
| CA4963 | IPF3919      | -1.0 | 1.2  | 1.2  | 1.1 | unknown function                                                                         |                            | orf19.6510  |
| CA3249 | GEF2         | -1.0 | 1.0  | 1.4  | 1.1 | Putative voltage-gated chloride channel protein (by homology)                            |                            | orf19.11219 |
| CA1235 | IPF20079     | 1.1  | 1.0  | 1.1  | 1.1 | unknown function                                                                         | YMR074c                    | orf19.8332  |
| CA4380 | IPF12736     | 1.0  | 1.1  | 1.2  | 1.1 | unknown function                                                                         |                            | orf19.5673  |
| CA5877 | IPF12082.3F  | -1.0 | 1.1  | 1.0  | 1.1 | bumetanide-sensitive Na-K-Cl cotransport protein, 3-prime end (by homology)              |                            | orf19.6832  |
| CA4926 | IPF1404      | 1.1  | 1.1  | -1.0 | 1.1 | unknown function                                                                         |                            | orf19.6065  |
| CA2676 | YHC1         | -1.0 | -1.0 | 1.0  | 1.1 | SMALL NUCLEAR RIBONUCLEOPROTEIN C (by hom                                                | YLR298c                    | orf19.5492  |
| CA5221 | MVP1.EXON1   | -1.1 | 1.0  | 1.1  | 1.1 | Required for vacuolar protein sorting, exon 1 (by homology)                              |                            | orf19.7039  |
| CA5519 | RDH54        | 1.0  | 1.2  | 1.3  | 1.1 | helicase required for mitotic diploid-specific recombination                             | YBR073w                    | orf19.5367  |
| CA2450 | IPF2589      | -1.1 | 1.0  | 1.1  | 1.1 | unknown function                                                                         |                            | orf19.5508  |
| CA5783 | IPF1128      | 1.0  | -1.1 | -1.0 | 1.1 | unknown function                                                                         |                            | orf19.5430  |
| CA3403 | IPF8650      | -1.2 | 1.2  | -1.1 | 1.1 | RNA helicase (by homology)                                                               | YGR271w                    | orf19.3980  |
| CA3845 | IPF7944      | -1.1 | 1.0  | 1.1  | 1.1 | unknown function                                                                         | YOR292c                    | orf19.6605  |
| CA6124 | ARG11        | 1.1  | 1.0  | -1.0 | 1.1 | mitochondrial amino acid transporter (by homology)                                       | YOR130c                    | orf19.5926  |
| CA0391 | DDC1         | 1.0  | 1.0  | 1.0  | 1.1 | DNA damage checkpoint protein, delays the cell cycle a                                   | YPL194w                    | orf19.7875  |
| CA0454 | RPN6         | -1.0 | -1.1 | -1.1 | 1.1 | subunit of the regulatory particle of the proteasome (by                                 | YDL097c                    | orf19.8879  |
| CA2089 | GNA1         | -1.1 | -1.0 | 1.0  | 1.1 | Acetyltransferase                                                                        | YFL017c ; Missing in array | orf19.837   |
| CA0798 | IPF13565     | -1.0 | 1.0  | -1.0 | 1.1 | unknown function                                                                         | YNL308c                    | orf19.9177  |
| CA5514 | IPF730       | 1.0  | 1.1  | 1.1  | 1.1 | unknown function                                                                         |                            | orf19.5362  |
| CA5071 | IPF3597      | 1.2  | 1.1  | 1.3  | 1.1 | similar to <i>Saccharomyces cerevisiae</i> Ald4p mitochondrial aldehyde dehydrogenase (t |                            | orf19.3045  |
| CA2877 | TFB2         | -1.0 | 1.1  | 1.1  | 1.1 | Transcription/repair factor (by homology)                                                | YPL122c                    | orf19.5846  |
| CA4819 | IPF1194      | -1.1 | 1.2  | -1.0 | 1.1 | Similar to clathrin coat proteins                                                        | YHL019c                    | orf19.2078  |
| CA0796 | ALR1         | 1.0  | -1.0 | 1.0  | 1.1 | divalent cation transporter (by homology)                                                | YOL130w                    | orf19.9175  |
| CA3000 | TSC1.5       | 1.1  | 1.1  | 1.1  | 1.1 | 3-ketosphinganine reductase, 5-prime end (by homolog                                     | YBR265w                    | orf19.6131  |
| CA4907 | PSD1         | -1.1 | 1.1  | 1.1  | 1.1 | Phosphatidylserine decarboxylase 1 (by homology)                                         | YNL169c                    | orf19.6045  |
| CA1672 | IPF5196      | -1.1 | -1.2 | -1.0 | 1.1 | unknown function                                                                         |                            | orf19.11094 |
| CA2091 | IPF3401      | -1.0 | 1.1  | 1.2  | 1.1 | unknown function                                                                         | YLR143w                    | orf19.839   |
| CA1827 | IPF9520      | 1.1  | 1.1  | 1.1  | 1.1 | unknown function                                                                         |                            | orf19.11740 |
| CA2969 | IPF19772     | 1.0  | 1.2  | 1.1  | 1.1 | unknown function                                                                         |                            | orf19.5602  |
| CA2242 | IFQ1.5F      | 1.1  | 1.0  | 1.1  | 1.1 | Unknown function, 5-prime end                                                            |                            | orf19.4673  |
| CA5846 | IPF409       | 1.0  | 1.0  | 1.0  | 1.1 | unknown function                                                                         |                            | orf19.7502  |
| CA1012 | PSD2.5F      | 1.0  | 1.1  | 1.1  | 1.1 | phosphatidylserine decarboxylase 2, 5-prime end (by hc                                   | YGR170w                    | orf19.11436 |
| CA2097 | IPF11489     | 1.1  | 1.1  | 1.0  | 1.1 | unknown function                                                                         | YKL108w                    | orf19.2389  |
| CA3432 | MRPL17       | 1.1  | -1.0 | 1.2  | 1.1 | ribosomal protein of the large subunit                                                   | (YmL3YNL252c               | orf19.585   |
| CA1120 | IPF7666      | 1.0  | 1.0  | -1.0 | 1.1 | unknown function                                                                         |                            | orf19.4056  |

|        |             |      |      |      |     |                                                                |          |             |
|--------|-------------|------|------|------|-----|----------------------------------------------------------------|----------|-------------|
| CA4565 | VPS35       | 1.1  | 1.0  | -1.0 | 1.1 | Protein-sorting protein, vacuolar (by homology)                | YJL154c  | orf19.6875  |
| CA0611 | IPF17542    | -1.1 | 1.0  | -1.1 | 1.1 | unknown function                                               |          | orf19.13024 |
| CA4935 | VPS29       | -1.0 | 1.1  | -1.0 | 1.1 | vacuolar protein sorting protein (by homology)                 | YHR012w  | orf19.6076  |
| CA4135 | IPF20163    | 1.1  | 1.0  | 1.2  | 1.1 | unknown function                                               |          | orf19.4239  |
| CA4778 | IFJ1        | -1.0 | 1.1  | -1.0 | 1.1 | Unknown function                                               |          | orf19.4011  |
| CA5196 | IPF2338     | -1.0 | 1.2  | 1.3  | 1.1 | unknown function                                               | YIL001w  | orf19.7010  |
| CA2992 | RRS1        | 1.0  | 1.1  | 1.0  | 1.1 | Regulator for ribosome synthesis (by homology)                 | YOR294w  | orf19.6014  |
| CA5277 | CTA29.EXON1 | 1.1  | 1.0  | 1.1  | 1.1 | Protein with putative transcription activation domain, exon 1  |          | orf19.7127  |
| CA4745 | URA1        | 1.0  | 1.1  | 1.1  | 1.1 | dihydroorotate dehydrogenase                                   |          | orf19.4836  |
| CA4833 | IPF1216     | -1.0 | 1.1  | 1.2  | 1.1 | unknown function                                               |          | orf19.2064  |
| CA5733 | IPF2873     | 1.0  | 1.0  | 1.0  | 1.1 | unknown function                                               |          | orf19.7443  |
| CA0031 | COX7        | 1.0  | -1.0 | 1.0  | 1.1 | Subunit VII of cytochrome c oxidase (by homology)              | YMR256c  | orf19.227   |
| CA2276 | HNM3        | 1.0  | 1.0  | 1.1  | 1.1 | Choline permease (by homology)                                 |          | orf19.2587  |
| CA5921 | IPF8930     | 1.0  | -1.1 | -1.2 | 1.1 | unknown function                                               |          | orf19.6784  |
| CA5699 | ALS7        | 1.1  | 1.1  | 1.2  | 1.1 | agglutinin-like protein                                        |          | orf19.7400  |
| CA5782 | IPF1127     | 1.0  | -1.0 | 1.0  | 1.1 | unknown function                                               | YOR080w  | orf19.5429  |
| CA2771 | RPB10       | 1.1  | 1.1  | 1.2  | 1.1 | DNA-directed RNA polymerase II (by homology)                   | YOR210w  |             |
| CA5662 | IPF1250     | 1.1  | 1.1  | -1.0 | 1.1 | Flavin-containing monooxygenase (by homology)                  |          | orf19.7364  |
| CA5244 | IPF3043     | -1.0 | -1.0 | -1.0 | 1.1 | unknown function                                               |          | orf19.5019  |
| CA5215 | PPS1        | 1.0  | 1.1  | 1.0  | 1.1 | protein tyrosine phosphatase (by homology)                     | YBR276c  | orf19.7033  |
| CA3447 | YPT70       | -1.0 | 1.0  | 1.1  | 1.1 | GTP-binding protein (by homology)                              |          | orf19.2975  |
| CA4759 | IPF9655     | -1.0 | 1.0  | -1.0 | 1.1 | unknown function                                               |          | orf19.3988  |
| CA4754 | IPF11479    | 1.1  | 1.0  | 1.1  | 1.1 | unknown function                                               | YIL098c  | orf19.4825  |
| GSTTag |             | -1.0 | -1.0 | 1.0  | 1.1 |                                                                |          |             |
| CA5155 | IPF995      | 1.1  | -1.0 | 1.0  | 1.1 | unknown function                                               | YDR379ca |             |
| CA2383 | IPF18474    | -1.0 | 1.1  | 1.1  | 1.1 | unknown function                                               |          |             |
| CA3467 | MNT2        | 1.0  | -1.0 | 1.1  | 1.1 | Alpha-1,2-mannosyltransferase (by homology)                    | YDR483w  | orf19.1663  |
| CA2778 | MTR         | -1.1 | 1.1  | 1.1  | 1.1 | neutral amino acid permease-like by homology                   |          | orf19.278   |
| CA2128 | IPF4898     | -1.1 | 1.0  | -1.0 | 1.1 | unknown function                                               | YGR235c  | orf19.415   |
| CA5283 | IPF1912     | 1.1  | 1.0  | -1.2 | 1.1 | putative catechol o-methyltransferase                          |          | orf19.7140  |
| CA2887 | IPF13631    | -1.0 | 1.0  | 1.0  | 1.1 | unknown function                                               |          | orf19.2472  |
| CA2013 | CDC1        | -1.1 | 1.2  | 1.1  | 1.1 | Cell division control protein (by homology)                    | YDR182w  | orf19.3083  |
| CA0068 | ARC18       | 1.2  | 1.1  | 1.1  | 1.1 | subunit of the Arp2/3 complex involved in the control of       | YLR370c  | orf19.121   |
| CA5248 | IPF1828     | -1.0 | -1.1 | -1.1 | 1.1 | unknown function                                               | YGL085w  | orf19.5014  |
| CA3594 | IPF6076.3   | 1.0  | 1.0  | 1.1  | 1.1 | unknown function, 3-prime end                                  | YGL161c  | orf19.4922  |
| CA0657 | IPF19877    | 1.0  | 1.1  | 1.0  | 1.1 | putative cysteine synthase (by homology)                       | YGR012w  | orf19.5574  |
| CA1343 | IPF14624    | -1.1 | -1.0 | -1.1 | 1.1 | unknown function                                               |          |             |
| CA2755 | IFA12       | 1.1  | 1.1  | 1.1  | 1.1 | unknown function                                               |          | orf19.13064 |
| CA0523 | IPF4459     | 1.1  | 1.0  | 1.1  | 1.1 | unknown function                                               | YKR074w  | orf19.11012 |
| CA4750 | IPF4477     | -1.0 | 1.1  | 1.2  | 1.1 | similar to <i>Saccharomyces cerevisiae</i> Doa1p involved in   | YKL213c  | orf19.4829  |
| CA0170 | IPF15959    | -1.0 | 1.0  | -1.0 | 1.1 | unknown function                                               |          | orf19.1105  |
| CA4886 | IPF1634     | 1.1  | 1.0  | 1.1  | 1.1 | unknown function                                               |          | orf19.6578  |
| CA0716 | DOG2        | -1.0 | 1.2  | 1.1  | 1.1 | 2-deoxyglucose-6-phosphate phosphatase (by homolog             | YHR044c  | orf19.3392  |
| CA2266 | HEM1        | -1.0 | 1.1  | 1.0  | 1.1 | 5-aminolevulinic acid synthase                                 | YDR232w  | orf19.10132 |
| CA1161 | GRX3        | 1.1  | 1.0  | 1.2  | 1.1 | glutaredoxin-like protein                                      | YDR098c  | orf19.2727  |
| CA5404 | MET14       | 1.0  | 1.1  | 1.0  | 1.1 | Adenylylsulfate kinase (by homology)                           | YKL001c  | orf19.946   |
| CA1812 | IPF13879    | 1.0  | 1.1  | 1.0  | 1.1 | unknown function                                               |          | orf19.1120  |
| CA0842 | IPF15633    | -1.1 | 1.0  | -1.0 | 1.1 | similar to <i>Saccharomyces cerevisiae</i> Bst1p egative regl. | YFL025c  | orf19.1053  |
| CA2941 | CVB1        | -1.0 | 1.0  | 1.0  | 1.1 | vacuole biogenesis component                                   |          | orf19.1970  |

|        |              |      |      |      |     |                                                               |                  |             |
|--------|--------------|------|------|------|-----|---------------------------------------------------------------|------------------|-------------|
| CA3743 | IPF19998     | 1.0  | 1.1  | 1.2  | 1.1 | unknown function                                              | YNR074c          | orf19.2175  |
| CA0491 | IPF18966     | 1.1  | 1.0  | 1.1  | 1.1 | unknown function                                              |                  |             |
| CA2596 | IPF19546     | 1.4  | -1.4 | -1.0 | 1.1 | unknown function                                              | YOL002c          | orf19.55    |
| CA2133 | IPF5866      | -1.1 | 1.1  | 1.2  | 1.1 | unknown function                                              |                  | orf19.5213  |
| CA0212 | IPF4325      | 1.0  | 1.1  | 1.1  | 1.1 | unknown function                                              |                  | orf19.12969 |
| CA3370 | IPF4674      | 1.1  | 1.0  | 1.1  | 1.1 | unknown Function                                              | YIL087c          | orf19.1852  |
| CA2337 | IPF13379     | -1.0 | -1.0 | 1.0  | 1.1 | unknown function                                              | YGR031w          | orf19.2352  |
| CA1902 | OPT1         | -1.0 | 1.1  | 1.1  | 1.1 | oligopeptide transporter                                      | YJL212c          | orf19.2602  |
| CA0447 | IPF14275     | -1.1 | 1.0  | 1.0  | 1.1 | Probable ADP-ribosylation factors (by homology)               | YPL051w          | orf19.2297  |
| CA1488 | IPF17402     | 1.4  | 1.1  | 1.4  | 1.1 | unknown function                                              | YJL062w          | orf19.4064  |
| CA0944 | IPF10280     | 1.0  | 1.0  | 1.0  | 1.1 | unknown function                                              |                  | orf19.8852  |
| CA2870 | OPT2.53F     | -1.0 | 1.0  | 1.0  | 1.1 | Oligopeptide transporter, internal fragment (by homology)     |                  |             |
| CA0677 | IPF13095     | -1.1 | -1.1 | -1.1 | 1.1 | unknown function                                              | YGL212w          | orf19.8773  |
| CA2617 | IPF3539      | 1.1  | -1.0 | -1.0 | 1.1 | unknown function                                              | Missing in array | orf19.2813  |
| CA2909 | IPF11424     | -1.1 | -1.1 | -1.1 | 1.1 | unknown function                                              | YPL150w          | orf19.4518  |
| CA2584 | IPF9440      | 1.2  | 1.1  | -1.0 | 1.1 | similar to <i>Saccharomyces cerevisiae</i> Fmn1p riboflavin k | YDR236c          | orf19.4373  |
| CA2808 | IPF11966     | 1.3  | 1.1  | 1.1  | 1.1 | unknown function                                              | YOR021c          | orf19.5783  |
| CA0620 | IPF17998     | -1.0 | 1.0  | 1.0  | 1.1 | unknown function                                              |                  | orf19.3147  |
| CA3805 | IPF12403     | 1.0  | 1.1  | 1.2  | 1.1 | unknown function                                              | YDR415c          | orf19.2484  |
| CA4930 | IPF8381      | -1.2 | 1.0  | 1.1  | 1.1 | similar to <i>Saccharomyces cerevisiae</i> Mdm20p involved    | YOL076w          | orf19.6071  |
| CA3036 | IPF13443     | -1.0 | 1.1  | 1.1  | 1.1 | unknown function                                              |                  | orf19.211   |
| CA0340 | IPF19859     | 1.1  | 1.1  | 1.0  | 1.1 | unknown function                                              |                  | orf19.3375  |
| CA1302 | FCA1.3       | 1.1  | 1.0  | 1.1  | 1.1 | cytosine deaminase, 3-prime end                               | YPR062w          |             |
| CA5554 | IPF1960.5F   | -1.1 | 1.1  | 1.0  | 1.1 | putative transcriptional activator, 5-prime end               |                  | orf19.7318  |
| CA2628 | SIR22        | 1.0  | -1.0 | 1.0  | 1.1 | canal regulatory protein (by homology)                        | YOL068c          | orf19.12225 |
| CA3069 | IPF6117      | -1.0 | 1.1  | 1.2  | 1.1 | unknown function                                              | YMR266w          | orf19.4805  |
| CA4298 | TIM9         | 1.1  | 1.1  | 1.1  | 1.1 | Mitochondrial inner membrane translocase (by homolog          | YEL020wa         | orf19.6696  |
| CA0600 | MSN5.5F      | -1.1 | 1.4  | 1.4  | 1.1 | Importin-beta family member required for nuclear export       | YDR335w          | orf19.2666  |
| CA5984 | CUS1         | -1.1 | 1.0  | 1.0  | 1.1 | spliceosome associated protein (by homology)                  | YMR240c          | orf19.7581  |
| CA4608 | CCH1         | -1.2 | 1.1  | 1.3  | 1.1 | Calcium channel protein (by homology)                         | YGR217w          | orf19.3298  |
| CA2509 | IPF1471      | 1.1  | 1.0  | 1.1  | 1.1 | aminotriazole resistance protein (by homology)                | YOR378w          | orf19.304   |
| CA3420 | SMX4         | 1.1  | 1.1  | 1.0  | 1.1 | U6 snRNA-associated Sm-like protein (by homology)             | YLR438ca         |             |
| CA1619 | IPF2067      | 1.1  | -1.0 | 1.2  | 1.1 | Required for mannosylation of sphingolipids (by homolo        | YPL057c          | orf19.11558 |
| CA0076 | IPF8866      | 1.2  | 1.1  | 1.2  | 1.1 | unknown function                                              |                  | orf19.4906  |
| CA5130 | IFH2         | 1.0  | 1.0  | -1.1 | 1.1 | Dioxygenase (by homology)                                     |                  | orf19.13756 |
| CA5405 | MRP17        | 1.0  | 1.0  | -1.0 | 1.1 | Mitochondrial ribosomal protein (by homology)                 | YKL003c          | orf19.947   |
| CA3355 | IPF11277     | 1.0  | 1.0  | 1.1  | 1.1 | unknown function                                              |                  | orf19.9498  |
| CA4451 | ELC1         | 1.1  | -1.0 | 1.0  | 1.1 | Transcription elongation factor (by homology)                 | YPL046c          | orf19.6849  |
| CA3392 | SEC13        | -1.0 | 1.0  | -1.1 | 1.1 | Protein transport protein                                     | YLR208w          | orf19.316   |
| CA2078 | IPF13352     | 1.0  | 1.1  | 1.0  | 1.1 | unknown function                                              |                  | orf19.4873  |
| CA6083 | IPF26        | 1.0  | -1.0 | 1.0  | 1.1 | unknown function                                              | YPR152c          | orf19.5976  |
| CA3134 | =11499.REPEA | 1.0  | 1.1  | 1.0  | 1.1 | unknown function                                              |                  | orf19.1365  |
| CA1835 | CRH12        | -1.0 | -1.0 | 1.0  | 1.1 | Cell wall protein (by homology)                               |                  | orf19.3966  |
| CA2230 | IPF10936     | 1.0  | -1.1 | 1.0  | 1.1 | unknown function                                              |                  | orf19.3928  |
| CA4099 | IPF3986      | 1.1  | 1.0  | 1.1  | 1.1 | unknown function                                              | YLR186w          | orf19.665   |
| CA1677 | GTR1         | 1.0  | 1.0  | 1.0  | 1.1 | GTP-binding protein by homology                               | YML121w          | orf19.3617  |
| CA0545 | IPF3251      | 1.0  | -1.0 | -1.1 | 1.1 | unknown function                                              |                  | orf19.2869  |
| CA3506 | IFA5         | 1.0  | 1.1  | 1.1  | 1.1 | unknown function                                              |                  | orf19.6353  |
| CA5198 | LPA4         | 1.4  | 1.0  | -1.1 | 1.1 | Similar to ribosomal protein S16, mitochondrial (by hom       | YPL013c          | orf19.7012  |

|        |             |      |      |      |     |                                                                         |                  |             |
|--------|-------------|------|------|------|-----|-------------------------------------------------------------------------|------------------|-------------|
| CA1893 | TIM13       | 1.0  | 1.1  | 1.1  | 1.1 | subunit of mitochondrial protein import machinery-like b                | YGR181w          | orf19.2754  |
| CA3088 | IPF9826     | -1.2 | -1.1 | 1.1  | 1.1 | unknown function                                                        | YLR256w          | orf19.11621 |
| CA4277 | BTS1        | -1.1 | 1.0  | -1.0 | 1.1 | Geranylgeranyl diphosphate synthase (by homology)                       | YPL069c          | orf19.6674  |
| CA1160 | IPF10262    | -1.0 | 1.1  | 1.0  | 1.1 | unknown function                                                        | YKL051w          | orf19.2726  |
| CA4319 | RPN10       | 1.0  | 1.1  | 1.1  | 1.1 | Protein degradation (by homology)                                       | YHR200w          | orf19.4102  |
| CA5429 | CDC27       | -1.0 | 1.1  | -1.0 | 1.1 | subunit of anaphase-promoting complex (by homology)                     | YBL084c          | orf19.3231  |
| CA2594 | IPF12824    | -1.0 | 1.0  | 1.0  | 1.1 | unknown function                                                        | YJL072c          | orf19.57    |
| CA5644 | IPF447      | -1.0 | 1.0  | 1.0  | 1.1 | unknown function                                                        | YNL110c          | orf19.7050  |
| CA3816 | IPF4017     | 1.0  | 1.1  | 1.0  | 1.1 | unknown function                                                        |                  | orf19.2500  |
| CA0305 | INO80       | -1.1 | -1.0 | -1.1 | 1.1 | DNA helicase (by homology)                                              | YGL150c          | orf19.1734  |
| CA0882 | PHR3        | 1.1  | 1.0  | 1.1  | 1.1 | surface glycoprotein (by homology)                                      | YOL132w          | orf19.8010  |
|        | NAD1        | 1.0  | 1.0  | 1.0  | 1.1 |                                                                         |                  |             |
| CA1888 | IPF18594    | 1.0  | 1.0  | 1.1  | 1.1 | unknown function                                                        |                  | orf19.9748  |
| CA3397 | IPF13618    | 1.1  | 1.0  | 1.0  | 1.1 | unknown function                                                        | YMR292w          | orf19.3972  |
| CA3020 | IPF15492    | 1.1  | 1.0  | 1.0  | 1.1 | unknown function                                                        |                  | orf19.3908  |
| CA0812 | IPF3348     | 1.1  | 1.1  | 1.2  | 1.1 | unknown function                                                        |                  | orf19.1917  |
| CA1624 | IPF10055    | 1.0  | 1.1  | 1.2  | 1.1 | unknown function                                                        |                  | orf19.467   |
| CA3779 | IPF11221    | 1.0  | 1.0  | 1.0  | 1.1 | unknown function                                                        |                  | orf19.5841  |
| CA1844 | IFL5.3      | 1.0  | 1.0  | -1.0 | 1.1 | unknown function, 3-prime end                                           |                  | orf19.654   |
| CA0293 | IPF6624     | 1.0  | 1.1  | 1.1  | 1.1 | unknown function                                                        | YDL222c          | orf19.6489  |
| CA2964 | IPF13176.3  | 1.1  | 1.0  | 1.0  | 1.1 | ornithine carbamoyltransferase, 3-prime end (by homol                   | YJL088w          | orf19.5610  |
| CA5361 | NPL3        | -1.1 | 1.2  | 1.2  | 1.1 | nucleolar shuttling protein with an RNA recognition moti                | YDR432w          | orf19.7238  |
| CA4533 | COX4        | 1.2  | 1.1  | 1.3  | 1.1 | cytochrome-c oxidase (by homology)                                      | YGL187c          | orf19.1471  |
| CA0900 | IPF12031    | 1.1  | 1.2  | 1.2  | 1.1 | unknown function                                                        | YNR027w          | orf19.3411  |
| CA0745 | MTF1        | -1.1 | -1.1 | -1.0 | 1.1 | RNA polymerase specific factor, mitochondrial (by hom                   | YMR228w          | orf19.9104  |
| CA4703 | CLP1        | -1.1 | -1.1 | 1.0  | 1.1 | probable cleavage/polyadenylation factor                                | YOR250c          | orf19.6931  |
| CA0383 | IPF16028    | -1.1 | 1.0  | 1.2  | 1.1 | unknown function                                                        |                  | orf19.1841  |
| CA6089 | RDI1        | 1.2  | -1.0 | -1.0 | 1.1 | Rho GDP dissociation inhibitor (by homology)                            | YDL135c          | orf19.5968  |
| CA5081 | COQ6        | -1.2 | -1.0 | 1.0  | 1.1 | monooxygenase (by homology)                                             | YGR255c          | orf19.3058  |
| CA0873 | BUL1        | -1.3 | -1.0 | -1.2 | 1.1 | Ubiquitin ligase binding protein                                        | YMR275c          | orf19.12099 |
| CA0655 | IPF11560.5F | 1.1  | 1.1  | 1.1  | 1.1 | Ca <sup>2+</sup> -transporting P-type ATPase, 5-prime end (by homology) |                  | orf19.10085 |
| CA5331 | DUR33       | -1.0 | 1.1  | 1.1  | 1.1 | Urea transport protein (by homology)                                    |                  | orf19.7205  |
| CA4254 | IPF18234.3  | -1.0 | 1.0  | 1.2  | 1.1 | Unknown Function, 3-prime end                                           |                  |             |
| CA2822 | IPF14550    | 1.0  | 1.0  | 1.1  | 1.1 | unknown function                                                        |                  | orf19.1314  |
| CA5610 | PMR1        | 1.1  | 1.0  | 1.1  | 1.1 | calcium/mangenease P-type ATPase                                        | YGL167c          | orf19.7089  |
| CA5982 | IPF915      | 1.0  | 1.1  | -1.0 | 1.1 | unknown function                                                        | YDR057w          | orf19.7578  |
| CA0178 | CDC6        | -1.0 | 1.0  | 1.1  | 1.1 | Cell division control protein                                           | YJL194w          | orf19.12707 |
| CA3910 | IPF3293     | -1.1 | 1.0  | -1.0 | 1.1 | unknown function                                                        | YBR163w          | orf19.4392  |
| CA1437 | IPF7163     | 1.1  | 1.1  | 1.1  | 1.1 | unknown function                                                        |                  | orf19.1200  |
| CA0326 | IPF15220    | 1.0  | -1.0 | 1.1  | 1.1 | Unknown function                                                        | Missing in array | orf19.3780  |
| CA0794 | IPF15639    | 1.0  | -1.0 | 1.0  | 1.1 | unknown function                                                        | YCL038c          | orf19.552   |
| CA2247 | IPF7404     | 1.1  | -1.0 | 1.0  | 1.1 | unknown function                                                        |                  | orf19.12135 |
| CA5906 | IPF5949     | -1.0 | 1.0  | 1.1  | 1.1 | unknown function                                                        | YPL188w          | orf19.6800  |
| CA3875 | IPF14430    | -1.1 | -1.1 | -1.0 | 1.1 | putative kynureninase (by homology)                                     | YLR231c          | orf19.8024  |
| CA2316 | IPF14542    | -1.0 | 1.0  | 1.0  | 1.1 | unknown function                                                        |                  | orf19.8963  |
| CA1426 | ALS11.3F    | 1.1  | 1.1  | 1.1  | 1.1 | agglutinin-like protein, 3-prime end                                    |                  | orf19.13168 |
| CA1183 | IPF14805    | 1.1  | -1.0 | 1.1  | 1.1 | acetyl-coenzyme A transporter(by homology)                              | YBR220c          | orf19.11263 |
| CA2241 | IFQ1.3F     | 1.1  | 1.0  | 1.1  | 1.1 | Unknown function, 3-prime end                                           |                  | orf19.4674  |
| CA5656 | IPF14683    | -1.0 | -1.1 | -1.1 | 1.1 | unknown function                                                        | YNL026w          | orf19.7358  |



|        |              |      |      |      |     |                                                                                               |                            |             |
|--------|--------------|------|------|------|-----|-----------------------------------------------------------------------------------------------|----------------------------|-------------|
| CA4646 | IPF1495      | 1.1  | 1.1  | 1.0  | 1.1 | unknown function                                                                              |                            | orf19.353   |
| CA2812 | TEM1         | 1.0  | 1.0  | 1.1  | 1.1 | GTP-binding protein of the RAS superfamily                                                    | YML064c                    | orf19.10519 |
| CA5238 | MET3         | -1.0 | 1.1  | 1.3  | 1.1 | ATP sulfurylase                                                                               | YJR010w                    | orf19.5025  |
| CA2829 | IFA7         | 1.0  | 1.1  | 1.1  | 1.1 | unknown function                                                                              |                            | orf19.1326  |
| CA0263 | GLK1         | -1.2 | 1.0  | 1.0  | 1.1 | aldohexose specific glucokinase (by homology)                                                 | YCL040w                    | orf19.1408  |
| CA1184 | IPF14802     | 1.1  | -1.1 | 1.3  | 1.1 | unknown function                                                                              | YCL057ca                   |             |
| CA3768 | IPF13467     | 1.0  | 1.0  | -1.0 | 1.1 | Putative peroxisomal 2,4-dienoyl-CoA reductase (by homology)                                  |                            | orf19.2899  |
| CA3712 | IPF7891      | -1.0 | 1.1  | -1.0 | 1.1 | unknown function                                                                              |                            | orf19.4936  |
| CA0777 | IPF11777     | -1.1 | 1.2  | 1.0  | 1.1 | unknown function                                                                              |                            | orf19.4778  |
| 4511.1 |              | -1.0 | -1.1 | -1.1 | 1.1 |                                                                                               |                            |             |
| CA0227 | PHO23        | -1.1 | -1.1 | -1.0 | 1.1 | Involved in transcriptional regulation of PHO5 (by homo                                       | YNL097c                    | orf19.9328  |
| CA0517 | HEM13        | 1.1  | -1.0 | 1.0  | 1.1 | by homology <i>S. cerev.</i> : coproporphyrinogen III oxidase                                 | YDR044w ; Missing in array | orf19.2803  |
| CA1502 | RPS7A        | -1.1 | -1.1 | -1.0 | 1.1 | ribosomal protein (by homology)                                                               | YOR096w                    | orf19.9267  |
| CA4538 | IPF20018     | 1.2  | 1.3  | 1.3  | 1.1 | unknown function                                                                              |                            | orf19.1465  |
| CA0015 | PHO87.5EOC   | -1.0 | 1.1  | 1.0  | 1.1 | Member of the phosphate permease family, 5-prime end (by homology)                            |                            | orf19.9990  |
| CA0045 | IPF8985.5EOC | -1.0 | 1.0  | 1.1  | 1.1 | unknown function, 5-prime end                                                                 |                            | orf19.1368  |
| CA3853 | MVD1.3       | 1.1  | 1.1  | 1.2  | 1.1 | mevalonate pyrophosphate decarboxylase, 3-prime end                                           | YNR043w                    | orf19.6105  |
| CA3481 | IPF3223      | 1.0  | -1.0 | 1.1  | 1.1 | unknown function                                                                              |                            |             |
| CA0129 | IPF10495     | 1.1  | -1.0 | -1.0 | 1.1 | unknown function                                                                              | YIL108w                    | orf19.246   |
| CA0359 | IPF17488.3F  | -1.0 | 1.0  | -1.0 | 1.1 | unknown function, 3-prime end                                                                 |                            | orf19.1820  |
| CA4792 | HIS1         | 1.1  | 1.1  | 1.1  | 1.1 | ATP phosphoribosyltransferase                                                                 | YER055c                    | orf19.4026  |
| CA5532 | ARP2         | -1.0 | 1.1  | 1.2  | 1.1 | actin-like protein (by homology)                                                              | YDL029w                    | orf19.7292  |
| CA0419 | IPF19864     | -1.0 | -1.1 | -1.1 | 1.1 | unknown function                                                                              | YGR080w                    | orf19.2228  |
| CA2635 | CKB22        | 1.0  | 1.1  | 1.1  | 1.1 | Casein kinase II, beta subunit (by homology)                                                  | YOR039w                    | orf19.4297  |
| CA0623 | MSS4.3       | -1.1 | -1.1 | 1.1  | 1.1 | phosphatidylinositol-4-phosphate 5-kinase, 3-prime end                                        | YDR208w                    | orf19.3153  |
| CA2749 | IPF11465     | -1.0 | -1.1 | -1.0 | 1.1 | unknown function                                                                              | YNL261w                    | orf19.2369  |
| CA4535 | CDC55        | 1.0  | 1.1  | 1.1  | 1.1 | B subunit of protein phosphatase 2A (by homology)                                             | YGL190c                    | orf19.1468  |
| CA1107 | IPF11271     | 1.1  | 1.0  | 1.1  | 1.1 | by homology to <i>S. cerevisiae</i> : ATP19 subunit K of the                                  | YOL077wa                   |             |
| CA4828 | IPF1209      | -1.1 | 1.0  | 1.0  | 1.1 | unknown function                                                                              |                            | orf19.2068  |
| CA4162 | MET1         | 1.0  | -1.0 | 1.0  | 1.1 | siroheme synthase (by homology)                                                               | YKR069w                    | orf19.5811  |
| CA3445 | IPF7325      | 1.0  | -1.0 | 1.1  | 1.1 | unknown function                                                                              |                            | orf19.2978  |
| CA4219 | SDS22        | 1.1  | 1.1  | 1.0  | 1.1 | regulatory subunit for the mitotic function of type I protei                                  | YKL193c                    | orf19.820   |
| CA5028 | IPF2998      | 1.0  | 1.0  | 1.0  | 1.1 | unknown function                                                                              | YJL131c                    | orf19.6982  |
| CA4715 | DPL1         | 1.1  | 1.1  | 1.1  | 1.1 | dihydrosphingosine phosphate lyase (by homology)                                              | YDR294c                    | orf19.6951  |
| CA5043 | FRP4         | -1.0 | 1.0  | 1.0  | 1.1 | member of the FRP family of proteins related to <i>Yarrowia lipolytica</i> glyoxylate pathway |                            | orf19.6997  |
| CA5477 | IPF18101     | 1.0  | 1.1  | 1.1  | 1.1 | unknown function                                                                              |                            | orf19.12766 |
| CA4374 | IPF5288      | 1.0  | 1.1  | 1.2  | 1.1 | Unknown function                                                                              | YMR041c                    | orf19.5665  |
| CA5465 | IPF285.3F    | 1.1  | 1.0  | 1.0  | 1.1 | unknown function, 3-prime end                                                                 |                            | orf19.3274  |
| CA2055 | SAP4         | 1.0  | -1.0 | 1.0  | 1.1 | secreted aspartyl proteinase                                                                  |                            | orf19.5716  |
| CA0016 | CAN5.5       | 1.0  | -1.0 | -1.0 | 1.1 | basic-amino-acid permease, 5-prime end (by homology)                                          |                            |             |
| CA4686 | IPF9015      | -1.0 | 1.1  | 1.1  | 1.1 | unknown function                                                                              | YHR098c                    | orf19.880   |
| CA3067 | IPF15811     | -1.0 | 1.0  | 1.1  | 1.1 | unknown function                                                                              |                            | orf19.11756 |
| CA2533 | IPF12790     | -1.1 | -1.1 | -1.0 | 1.1 | inositol polyphosphate 5-phosphatase (by homology)                                            | YOL065c                    | orf19.3180  |
| CA4456 | ATP1.EXON2   | 1.1  | 1.0  | 1.0  | 1.1 | F1F0-ATPase complex, F1 alpha subunit, exon 2                                                 |                            |             |
| CA0028 | IPF15345     | 1.0  | 1.0  | -1.0 | 1.1 | peptidyl-tRNA-hydrolase (by homology)                                                         |                            | orf19.1502  |
| CA2227 | EBP7         | 1.1  | 1.1  | 1.1  | 1.1 | NADPH DEHYDROGENASE by homology                                                               |                            | orf19.5816  |
| CA5036 | CYP52        | 1.0  | 1.1  | 1.0  | 1.1 | Peptidyl-prolyl cis-trans isomerase D (by homology)                                           |                            | orf19.6990  |
| CA0947 | CFL3         | -1.0 | 1.0  | 1.1  | 1.1 | ferric reductase-like protein                                                                 |                            | orf19.1270  |
| CA3037 | IPF13442     | -1.0 | 1.0  | 1.1  | 1.1 | unknown function                                                                              | YPL066w                    | orf19.210   |

|            |            |      |      |      |     |                                                                                 |                            |             |
|------------|------------|------|------|------|-----|---------------------------------------------------------------------------------|----------------------------|-------------|
| CA0291     | IPF13328   | 1.0  | -1.1 | 1.0  | 1.1 | unknown function                                                                | YPL041c                    | orf19.1592  |
| CA4343     | IPF3630    | 1.0  | 1.1  | 1.1  | 1.0 | unknown function                                                                | YHR049w                    | orf19.6717  |
| CA2776     | IPF10124   | 1.0  | 1.0  | 1.0  | 1.0 | Alcohol acetyltransferase (by homology)                                         | YGR212w                    | orf19.276   |
| CA6067     | DYN1       | -1.0 | 1.2  | 1.2  | 1.0 | dynein heavy chain, cytosolic (by homology)                                     | YKR054c ; Missing in array | orf19.5999  |
| CA0888     | BET1       | 1.1  | 1.1  | 1.1  | 1.0 | involved in ER-Golgi transport (by homology)                                    | YIL004c                    | orf19.1386  |
| CA3232     | IPF17727.3 | 1.0  | 1.1  | 1.1  | 1.0 | unknown function, 3-prime end                                                   |                            |             |
| CA3739     | RPS10.3    | 1.4  | -1.1 | -1.1 | 1.0 | ribosomal protein, 3-prime end (by homology)                                    | YOR293w                    |             |
| HumanG3PDH |            | 1.0  | -1.0 | 1.1  | 1.0 |                                                                                 |                            |             |
| CA2610     | CDC11      | -1.0 | -1.0 | 1.0  | 1.0 | septin by homology                                                              | YJR076c                    | orf19.5691  |
| CA5722     | IPF2446    | 1.0  | 1.0  | 1.1  | 1.0 | unknown function                                                                | YML018c                    | orf19.7427  |
| CA2352     | FMT1       | -1.0 | 1.0  | 1.1  | 1.0 | Methionyl-tRNA Transformylase (by homology)                                     | YBL013w                    | orf19.4418  |
| CA0289     | IPF13333   | 1.0  | 1.0  | -1.0 | 1.0 | unknown function                                                                |                            | orf19.1590  |
| CA1126     | ECM18.3EOC | -1.0 | -1.1 | -1.1 | 1.0 | cell wall biogenesis, 3-prime end (by homology)                                 |                            | orf19.3607  |
| CA4604     | MBF1       | 1.2  | 1.0  | 1.1  | 1.0 | Multiprotein bridging factor mediates GCN4-dependent                            | YOR298ca                   | orf19.3294  |
| CA2265     | CMK2       | -1.1 | -1.1 | -1.1 | 1.0 | Ca2+/calmodulin-dependent ser/thr protein kinase, type                          | YOL016c                    | orf19.1754  |
| CA2036     | MSP1       | 1.0  | -1.0 | 1.0  | 1.0 | 40 kDa putative membrane-spanning ATPase                                        | YGR028w                    | orf19.4362  |
| CA2954     | IPF10685   | -1.0 | 1.0  | 1.0  | 1.0 | unknown function                                                                |                            | orf19.5856  |
| CA3430     | IPF6382    | 1.0  | -1.0 | 1.0  | 1.0 | unknown function                                                                | YNL253w                    | orf19.587   |
| CA2606     | IPF5466    | -1.0 | 1.0  | 1.0  | 1.0 | unknown function                                                                | YHR140w                    | orf19.5683  |
| CA4553     | CYB1       | -1.1 | 1.1  | -1.0 | 1.0 | G2/Mitotic-specific cyclin                                                      | YPR119w                    | orf19.1446  |
| CA1537     | IPF17483   | 1.0  | 1.1  | 1.1  | 1.0 | unknown function                                                                |                            | orf19.450   |
| CA3379     | IPF8350    | 1.1  | 1.1  | -1.0 | 1.0 | putative methyltransferase (by homology)                                        | YDR140w                    | orf19.331   |
| CA1947     | IPF10637   | 1.0  | 1.0  | -1.0 | 1.0 | starvation protein -like (by homology)                                          |                            | orf19.12204 |
| CA3643     | IPF4124    | 1.0  | -1.0 | -1.0 | 1.0 | unknown function                                                                | Missing in array           | orf19.2034  |
| CA5996     | IPF673     | 1.0  | -1.0 | 1.1  | 1.0 | unknown function                                                                |                            | orf19.7596  |
| CA1664     | ERV1.3     | 1.1  | 1.1  | 1.0  | 1.0 | Mitochondrial biogenesis and regulation of cell cycle, 3-                       | YGR029w                    |             |
| CA1996     | SEC1       | 1.1  | 1.1  | 1.0  | 1.0 | transport protein                                                               | YDR164c                    | orf19.6479  |
| CA6020     | SPT3       | -1.0 | -1.0 | 1.0  | 1.0 | transcription factor                                                            | YDR392w                    | orf19.7622  |
| CA2234     | IPF10922   | 1.0  | 1.0  | 1.0  | 1.0 | unknown function                                                                |                            | orf19.3923  |
| CA2588     | IPF15098   | 1.1  | 1.0  | 1.1  | 1.0 | Unknown function                                                                |                            | orf19.4376  |
| CA3552     | IPF13231   | 1.0  | 1.1  | 1.1  | 1.0 | unknown function                                                                |                            | orf19.3877  |
| CA5645     | CYB5       | 1.6  | -1.2 | 1.2  | 1.0 | Cytochrome b5 (by homology)                                                     | YNL111c                    | orf19.7049  |
| CA0252     | SBP1.5EOC  | -1.1 | -1.0 | 1.3  | 1.0 | RNA binding protein-like, 5-prime end (by homology)                             |                            | orf19.13276 |
| ATP6       |            | 1.0  | -1.0 | -1.0 | 1.0 |                                                                                 |                            |             |
| CA1328     | RRP4       | 1.1  | 1.0  | 1.0  | 1.0 | 3 ->5' exoribonuclease required for 3' end formation of 5.8S rRNA (by homology) |                            | orf19.1304  |
| CA4973     | IPF4703    | 1.1  | 1.0  | 1.1  | 1.0 | unknown Function                                                                | YPR100w                    | orf19.5279  |
| NAD4       |            | 1.0  | -1.1 | -1.0 | 1.0 |                                                                                 |                            |             |
| CA1534     | MAP2       | -1.1 | -1.0 | 1.1  | 1.0 | methionine aminopeptidase (by homology)                                         | YBL091c                    | orf19.1214  |
| CA5176     | IPF6045    | -1.0 | -1.0 | -1.0 | 1.0 | unknown function                                                                | YPR049c                    | orf19.4614  |
| CA5871     | PIF2       | 1.0  | 1.1  | 1.4  | 1.0 | DNA helicase (by homology)                                                      | YHR031c                    | orf19.7538  |
| CA0845     | IPF16314   | -1.1 | -1.2 | -1.3 | 1.0 | unknown function                                                                |                            | orf19.7896  |
| CA5337     | APL1       | -1.0 | 1.0  | 1.1  | 1.0 | AP-2 complex subunit, beta2-adaptin (by homology)                               | YJR005w                    | orf19.7212  |
| CA2898     | IPF15646   | 1.0  | 1.0  | 1.1  | 1.0 | putative ATP-dependent RNA helicase (by homology)                               | YGL064c                    | orf19.3481  |
| CA2919     | IFA18.3    | 1.0  | 1.0  | 1.1  | 1.0 | unknown function, 3-prime end                                                   |                            | orf19.4507  |
| CA5374     | DDI1       | 1.0  | 1.1  | 1.3  | 1.0 | Response to DNA alkylation by homology                                          | YER143w                    | orf19.7258  |
| CA5818     | ARG1       | 1.1  | 1.1  | 1.2  | 1.0 | argininosuccinate synthetase (by homology)                                      | YOL058w                    | orf19.7469  |
| CA4816     | IPF1183    | -1.0 | 1.1  | -1.0 | 1.0 | putative aspartyl protease (by homology)                                        |                            | orf19.2082  |
| CA5253     | KEL3       | -1.0 | -1.0 | -1.0 | 1.0 | Kelch-repeat protein                                                            | YPL263c                    | orf19.5009  |
| CA4586     | GCN3       | 1.0  | 1.0  | 1.1  | 1.0 | Translation initiation factor eIF2B alpha subunit (by hom                       | YKR026c                    | orf19.6904  |

|        |            |      |      |      |     |                                                                                               |         |             |
|--------|------------|------|------|------|-----|-----------------------------------------------------------------------------------------------|---------|-------------|
| CA5965 | IPF961     | 1.0  | -1.0 | 1.3  | 1.0 | drug resistance protein (by homology)                                                         |         | orf19.7554  |
| CA1519 | RIM20      | -1.1 | -1.0 | -1.0 | 1.0 | Rim101 activating protein                                                                     | YOR275c | orf19.4800  |
| CA3662 | IPF17021   | -1.1 | -1.0 | -1.0 | 1.0 | unknown function                                                                              |         | orf19.6464  |
| CA4814 | SAS2       | 1.1  | 1.1  | 1.1  | 1.0 | Zinc finger protein involved in silencing (by homology)                                       | YMR127c | orf19.2087  |
| CA4742 | SHY1       | 1.1  | -1.1 | 1.1  | 1.0 | SURF homologue protein (by homology)                                                          | YGR112w | orf19.4841  |
| CA1350 | MCM2       | -1.0 | -1.0 | -1.1 | 1.0 | replication licensing factor (by homology)                                                    | YBL023c | orf19.4354  |
| CA1147 | KAP95      | 1.1  | -1.0 | 1.2  | 1.0 | karyopherin-beta protein (by homology)                                                        | YLR347c | orf19.11165 |
| CA5553 | IPF1960.3F | -1.0 | 1.1  | -1.0 | 1.0 | putative transcriptional activator, 3-prime end                                               |         | orf19.7317  |
| CA0421 | IPF9047    | -1.0 | 1.1  | -1.0 | 1.0 | unknown function                                                                              | YPR094w | orf19.2230  |
| CA0619 | IPF18924   | -1.1 | -1.0 | -1.0 | 1.0 | unknown function                                                                              |         | orf19.3146  |
| CA2079 | MNN3       | -1.2 | 1.0  | -1.0 | 1.0 | Golgi alpha-1,2-mannosyltransferase (by homology)                                             |         | orf19.4874  |
| CA3505 | IPF11372   | 1.0  | -1.0 | -1.0 | 1.0 | unknown function                                                                              |         | orf19.6351  |
| CA0931 | IPF3748    | 1.0  | 1.0  | 1.1  | 1.0 | unknown function                                                                              |         | orf19.562   |
| CA0150 | CDC123     | -1.1 | 1.1  | 1.3  | 1.0 | similar to <i>Saccharomyces cerevisiae</i> Cdc123p cell cycle                                 | YLR215c | orf19.10236 |
| CA3345 | IPF13357   | 1.0  | 1.0  | 1.1  | 1.0 | unknown function                                                                              | YDR362c | orf19.2325  |
| CA1290 | IPF16212   | -1.0 | 1.1  | 1.1  | 1.0 | unknown function                                                                              | YMR311c | orf19.2710  |
| CA5360 | IPF839     | 1.1  | 1.1  | 1.2  | 1.0 | unknown function                                                                              | YDR428c | orf19.7237  |
| CA5129 | ATS1       | 1.1  | 1.0  | 1.1  | 1.0 | similar to <i>Saccharomyces cerevisiae</i> Ats1p suppressor                                   | YAL020c | orf19.13757 |
| CA3269 | IPF12221   | 1.0  | 1.0  | 1.0  | 1.0 | unknown function                                                                              |         | orf19.6302  |
| CA3668 | DPP3       | 1.1  | 1.0  | 1.1  | 1.0 | Diacylglycerol Pyrophosphate Phosphatase by homolog                                           | YDR284c | orf19.6459  |
| CA5855 | ALK3       | 1.0  | 1.1  | 1.1  | 1.0 | n-alkane inducible cytochrome P-450 (by homology)                                             |         | orf19.7512  |
| CA0142 | CSL4       | 1.1  | 1.0  | 1.1  | 1.0 | Involved in kinetochore-related function (by homology)                                        | YNL232w | orf19.1026  |
| CA4460 | NSP49.5F   | 1.1  | 1.1  | 1.1  | 1.0 | nuclear pore protein, 5-prime end (by homology)                                               |         | orf19.6857  |
| CA6050 | IPF4939    | 1.0  | 1.0  | 1.1  | 1.0 | similar to <i>Saccharomyces cerevisiae</i> Seo1p suppressor of sulfoxide ethionine resistance |         | orf19.7666  |
| CA0860 | IPF17272   | -1.0 | 1.0  | 1.1  | 1.0 | unknown function                                                                              |         | orf19.3522  |
| CA2476 | IFF5       | -1.0 | -1.0 | -1.0 | 1.0 | unknown function                                                                              |         | orf19.10397 |
| CA3655 | POT13      | -1.1 | 1.2  | 1.1  | 1.0 | Acetyl-CoA C-acyltransferase, peroxisomal (by homology)                                       |         | orf19.2046  |
| CA4282 | IPF2319    | -1.2 | -1.0 | -1.0 | 1.0 | unknown function                                                                              |         | orf19.6680  |
| CA5394 | IPF9400    | 1.1  | 1.0  | 1.0  | 1.0 | unknown function                                                                              |         | orf19.937   |
| CA2850 | CDC50      | -1.0 | -1.0 | -1.0 | 1.0 | cell division cycle mutant (by homology)                                                      | YCR094w | orf19.5735  |
| CA4487 | IPF4039    | -1.0 | 1.0  | -1.1 | 1.0 | similar to <i>Saccharomyces cerevisiae</i> Nam8p recombinase                                  | YHR086w | orf19.1876  |
| CA4180 | EXG2       | 1.1  | 1.0  | -1.0 | 1.0 | glucan 1,3-beta-glucosidase-like by homology                                                  |         | orf19.2952  |
| CA0718 | IPF9782    | -1.0 | -1.1 | 1.0  | 1.0 | unknown function                                                                              | YPL060w | orf19.3455  |
| CA4241 | IPF8177    | -1.0 | -1.0 | -1.0 | 1.0 | unknown function                                                                              |         | orf19.527   |
| CA2891 | IFS4       | -1.0 | -1.0 | -1.0 | 1.0 | Pirin protein (by homology)                                                                   |         | orf19.2467  |
| CA4592 | IPF2215    | 1.1  | 1.0  | -1.0 | 1.0 | unknown function                                                                              | YMR112c | orf19.6909  |
| CA1234 | IPF18732   | -1.0 | 1.0  | 1.1  | 1.0 | histidine-rich glycoprotein precursor (by homology)                                           |         | orf19.8330  |
| CA2142 | MRPL33     | 1.0  | 1.1  | 1.0  | 1.0 | ribosomal protein of the large subunit, mitochondrial (by                                     | YMR286w |             |
| CA2760 | IPF13790   | 1.0  | 1.0  | -1.1 | 1.0 | Unknown function                                                                              |         | orf19.13070 |
| CA5177 | IPF11101   | 1.0  | 1.0  | 1.1  | 1.0 | Weak similarity to <i>C. cerevisiae</i> hypothetical protein (by                              | YBR095c | orf19.4615  |
| CA4924 | UBP6.3     | -1.1 | 1.1  | -1.0 | 1.0 | Ubiquitin-specific protease, 3-prime end (by homology)                                        | YFR010w | orf19.6063  |
| CA4205 | IFA10      | 1.0  | 1.1  | 1.1  | 1.0 | unknown function                                                                              |         | orf19.12024 |
| CA4278 | IPF2310    | -1.0 | -1.0 | -1.1 | 1.0 | unknown function                                                                              |         | orf19.6675  |
| CA5080 | IPF9268.3  | -1.0 | 1.1  | 1.1  | 1.0 | similar to <i>Saccharomyces cerevisiae</i> Srb4p DNA-directe                                  | YER022w | orf19.3055  |
| CA3038 | IPF13438   | 1.1  | 1.1  | 1.2  | 1.0 | unknown function                                                                              | YIL049w | orf19.209   |
| CA2818 | RPL13      | 1.3  | -1.1 | -1.2 | 1.0 | Ribosomal protein                                                                             | YDL082w | orf19.2994  |
| CA2801 | URA3       | 1.0  | 1.0  | 1.0  | 1.0 | orotidine-5 -monophosphate decarboxylase [ <i>Candida al</i>                                  | YEL021w | orf19.1716  |
| CA1559 | IPF16533   | 1.0  | 1.0  | 1.0  | 1.0 | unknown function                                                                              |         | orf19.1708  |
| CA2968 | BMR1       | 1.0  | 1.1  | 1.0  | 1.0 | benomyl/methothrexate resistance protein (by homology)                                        | YBR008c | orf19.5604  |

|        |              |      |      |      |     |                                                            |         |             |
|--------|--------------|------|------|------|-----|------------------------------------------------------------|---------|-------------|
| CA1205 | SSK2         | 1.1  | 1.1  | 1.0  | 1.0 | MAP kinase kinase kinase of the high osmolarity            | YNR031c | orf19.11257 |
| CA4034 | HSP31        | 1.0  | 1.1  | 1.1  | 1.0 | heat shock protein (by homology)                           |         | orf19.11148 |
| CA5757 | IPF1067      | -1.0 | -1.1 | -1.0 | 1.0 | Putative glutamate decarboxylase (by homology)             |         | orf19.5393  |
| CA3128 | IPF8914      | 1.0  | 1.1  | 1.0  | 1.0 | unknown function                                           | YNL213c | orf19.1360  |
| CA2544 | IPF16924     | 1.0  | 1.1  | 1.1  | 1.0 | unknown function                                           | YNL149c | orf19.2829  |
| CA5109 | UBC9         | 1.0  | 1.2  | 1.1  | 1.0 | E2 ubiquitin-conjugating enzyme (by homology)              | YDL064w | orf19.6424  |
| CA1903 | IPF2754      | 1.1  | 1.0  | 1.0  | 1.0 | unknown function                                           |         | orf19.2870  |
| CA0546 | IPF3250      | 1.0  | 1.1  | 1.0  | 1.0 | unknown function                                           |         | orf19.2870  |
| CA5637 | IPF472       | -1.0 | -1.0 | 1.1  | 1.0 | unknown Function                                           | YFR048w | orf19.7058  |
| CA0921 | IPF12992     | 1.1  | 1.1  | 1.2  | 1.0 | unknown function                                           | YPR139c | orf19.1043  |
| CA3260 | IPF7968      | -1.1 | 1.0  | 1.0  | 1.0 | unknown function                                           |         | orf19.2693  |
| CA6120 | IPF132       | 1.0  | 1.1  | -1.0 | 1.0 | unknown function                                           |         | orf19.5930  |
| CA2421 | IPF14998     | 1.0  | 1.1  | 1.1  | 1.0 | unknown function                                           | YDR200c | orf19.4471  |
| CA0856 | IFL1         | 1.1  | 1.1  | -1.0 | 1.0 | unknown function                                           |         | orf19.11943 |
| CA2946 | IPF6296      | 1.0  | 1.1  | 1.0  | 1.0 | putative methyltransferase (by homology)                   | YCR047c | orf19.1966  |
| CA1030 | ZRC1         | -1.0 | -1.0 | 1.2  | 1.0 | Zinc and cadmium resistance protein (by homology)          | YMR243c | orf19.9111  |
| CA2928 | SME1         | 1.0  | 1.1  | -1.0 | 1.0 | Nuclear ribonucleoprotein E                                | YOR159c |             |
| CA5254 | IPF1820      | 1.0  | 1.0  | 1.0  | 1.0 | unknown function                                           | YDR016c |             |
| CA4396 | IPF12294     | -1.0 | 1.0  | -1.1 | 1.0 | unknown function                                           |         | orf19.3115  |
| CA6064 | RPL81        | 1.2  | 1.0  | -1.0 | 1.0 | 60S ribosomal protein L7a.e.B (by homology)                | YLL045c | orf19.6002  |
| CA0593 | ARP6         | 1.0  | -1.0 | 1.2  | 1.0 | actin-related protein (by homology)                        | YLR085c | orf19.4904  |
| CA3335 | IPF8682      | 1.0  | 1.0  | 1.0  | 1.0 | unknown function                                           |         | orf19.2336  |
| CA0144 | IPF19195.3F  | -1.0 | 1.0  | 1.0  | 1.0 | putative amino acid or GABA permease, 3-prime end (b       | YKL174c | orf19.151   |
| CA0114 | SSU72        | -1.0 | 1.0  | -1.0 | 1.0 | suppressor of cs mutant of sua7(by homology)               | YNL222w | orf19.9939  |
| CA4889 | IPF1629      | 1.0  | 1.1  | 1.1  | 1.0 | unknown function                                           | YOL003c | orf19.6581  |
| CA2952 | IPF19671     | -1.0 | 1.0  | 1.0  | 1.0 | unknown function                                           |         | orf19.259   |
| CA0487 | IPF13724     | 1.0  | 1.0  | 1.0  | 1.0 | unknown function                                           |         | orf19.259   |
| CA2940 | IPF8318      | -1.0 | -1.0 | 1.1  | 1.0 | unknown function                                           |         | orf19.3323  |
| CA3835 | RTA4         | 1.0  | 1.0  | 1.2  | 1.0 | Protein involved in 7-aminosterol resistance (by homology) |         | orf19.6595  |
| CA1401 | TOM22        | 1.0  | -1.0 | 1.0  | 1.0 | mitochondrial outer membrane import receptor complex       | YNL131w | orf19.3696  |
| CA0920 | IPF18833     | 1.0  | 1.1  | 1.2  | 1.0 | unknown function                                           |         | orf19.2035  |
| CA3644 | IPF4126      | -1.0 | -1.1 | -1.0 | 1.0 | unknown function                                           |         | orf19.2035  |
| CA0928 | IPF19891     | -1.1 | 1.0  | 1.0  | 1.0 | unknown function                                           |         | orf19.8192  |
| CA2920 | FET5         | -1.1 | 1.2  | -1.0 | 1.0 | multicopy oxidase (by homology)                            |         | orf19.4215  |
| CA1099 | IPF12312     | 1.0  | -1.0 | -1.0 | 1.0 | unknown function                                           |         | orf19.12536 |
| CA2973 | =14452.REPEA | 1.2  | -1.0 | 1.2  | 1.0 | F1-ATPase epsilon subunit (by homology)                    |         | orf19.5863  |
| CA2960 | IPF8590      | 1.1  | 1.0  | 1.0  | 1.0 | unknown function                                           |         | orf19.5863  |
| CA0907 | IPF19889     | 1.0  | -1.0 | 1.1  | 1.0 | Unknown Function                                           |         | orf19.1484  |
| CA3090 | IPF18385     | -1.0 | -1.1 | -1.1 | 1.0 | unknown function                                           | YLR068w | orf19.11619 |
| CA2860 | IPF7054      | 1.0  | -1.0 | 1.0  | 1.0 | unknown function                                           |         | orf19.1062  |
| CA1995 | IPF6612      | -1.2 | 1.0  | 1.1  | 1.0 | unknown function                                           | YML038c | orf19.6480  |
| CA3156 | IPF14455     | -1.1 | -1.1 | -1.1 | 1.0 | similar to Saccharomyces cerevisiae Rrn7p polymerase       | YJL025w | orf19.1589  |
| CA4580 | IPF2233      | 1.1  | 1.0  | 1.1  | 1.0 | unknown function                                           |         | orf19.1589  |
| CA4675 | IPF3664      | 1.1  | 1.0  | 1.1  | 1.0 | unknown function                                           | YMR077c | orf19.897   |
| CA1736 | IPF4983      | 1.0  | 1.0  | -1.1 | 1.0 | unknown function                                           | YNL035c | orf19.2527  |
| CA5675 | SIS2         | -1.0 | 1.0  | 1.2  | 1.0 | Involved in cell cycle-specific gene expression (by homc   | YKR072c | orf19.7378  |
| CA3223 | SRP102       | 1.1  | 1.0  | 1.1  | 1.0 | Signal recognition particle receptor (by homology)         | YKL154w | orf19.6284  |
| CA4186 | PUT4         | 1.0  | 1.0  | -1.0 | 1.0 | proline permease                                           |         | orf19.2945  |
| CA5759 | PET191.3     | 1.0  | 1.0  | 1.1  | 1.0 | Assembly of cytochrome oxidase, 3-prime end (by hom        | YJR034w |             |

|        |              |      |      |      |     |                                                                                          |          |             |
|--------|--------------|------|------|------|-----|------------------------------------------------------------------------------------------|----------|-------------|
| CA1003 | ATP20        | 1.4  | -1.0 | 1.2  | 1.0 | F1F0-ATPase complex, G subunit (by homology)                                             | YPR020w  | orf19.3757  |
| CA3794 | NCB2         | -1.0 | 1.2  | 1.1  | 1.0 | Transcriptional repressor by homology                                                    | YDR397c  | orf19.5825  |
| CA5624 | IPF501       | -1.0 | -1.0 | 1.0  | 1.0 | unknown function                                                                         |          | orf19.7073  |
| CA4055 | YPT522       | 1.0  | -1.0 | 1.0  | 1.0 | GTP-binding protein of the rab family(by homology)                                       | YBR264c  | orf19.430   |
| CA2868 | IPF20118     | 1.0  | 1.1  | 1.1  | 1.0 | unknown function                                                                         |          | orf19.2846  |
| CA3511 | MMS2         | 1.0  | 1.0  | 1.2  | 1.0 | ubiquitin-conjugating enzyme (by homology)                                               | YGL087c  | orf19.6358  |
| CA0510 | ETF1         | -1.3 | -1.1 | -1.1 | 1.0 | ETF-UBIQUINONE OXIDOREDUCTASE (by homology)                                              | YOR356w  | orf19.10685 |
| CA3206 | IPF3454      | -1.0 | 1.1  | 1.1  | 1.0 | unknown function                                                                         |          | orf19.6187  |
| CA1309 | IPF8627      | 1.0  | -1.0 | -1.0 | 1.0 | unknown function                                                                         |          | orf19.11452 |
| CA1475 | GLE2         | -1.0 | 1.1  | 1.1  | 1.0 | nuclear pore complex structure and function-like protein                                 | YER107c  | orf19.1095  |
| CA4946 | TOM71        | 1.1  | 1.0  | 1.1  | 1.0 | Translocase of the outer mitochondrial membrane (by h                                    | YNL070w  |             |
| CA5784 | IPF1129      | 1.1  | 1.0  | 1.1  | 1.0 | unknown function                                                                         |          | orf19.5431  |
| CA5008 | IPF12577     | 1.1  | 1.1  | 1.2  | 1.0 | unknown function                                                                         |          | orf19.5238  |
| CA3647 | IPF4129      | 1.0  | 1.0  | 1.1  | 1.0 | unknown function                                                                         |          | orf19.2038  |
| CA5913 | RRD1         | -1.0 | 1.0  | -1.0 | 1.0 | Phosphotyrosyl phosphatase activator involved in cell c                                  | YIL153w  | orf19.6792  |
| CA5001 | IPF2022      | -1.0 | 1.0  | 1.1  | 1.0 | unknown function                                                                         |          | orf19.5246  |
| CA0731 | IPF7333      | -1.0 | 1.1  | 1.1  | 1.0 | unknown function                                                                         | YNL023c  | orf19.11206 |
| CA2601 | IPF11181     | -1.1 | -1.0 | -1.0 | 1.0 | unknown function                                                                         | YML088w  | orf19.50    |
| CA3554 | IPF7770      | 1.1  | 1.1  | -1.0 | 1.0 | unknown function                                                                         | YOL053w  | orf19.3881  |
| CA2950 | CLN2         | 1.1  | -1.1 | 1.0  | 1.0 | G1/S-SPECIFIC CYCLIN CLN2                                                                | YAL040c  | orf19.9515  |
| CA1171 | IPF13264     | 1.0  | -1.0 | 1.0  | 1.0 | zinc-finger transcription factor of the Zn(2)-Cys(6) binuclear cluster domain type (by h |          | orf19.2748  |
| CA2845 | IPF10782     | -1.1 | 1.1  | 1.2  | 1.0 | unknown function                                                                         | YDR539w  | orf19.5730  |
| CA5391 | IPF18109     | 1.0  | 1.1  | -1.0 | 1.0 | unknown function                                                                         |          | orf19.934   |
| CA0250 | IPF17661     | -1.0 | 1.1  | 1.1  | 1.0 | unknown function                                                                         |          | orf19.1348  |
| CA6111 | IPF96        | -1.0 | -1.0 | -1.0 | 1.0 | C3HC4 type zinc finger protein (by homology)                                             | YML068w  | orf19.5942  |
| CA4086 | IPF5014      | -1.0 | -1.0 | -1.0 | 1.0 | unknown function                                                                         | YNL263c  | orf19.6642  |
| CA4013 | IPF4234      | 1.1  | 1.0  | 1.0  | 1.0 | unknown function                                                                         |          | orf19.1620  |
| CA0520 | IPF4466      | 1.0  | 1.0  | -1.0 | 1.0 | unknown function                                                                         |          | orf19.3531  |
| CA5634 | IPF477       | 1.0  | 1.0  | 1.0  | 1.0 | unknown function                                                                         | YFR007w  | orf19.7061  |
| CA1481 | RPB3         | -1.0 | 1.1  | 1.1  | 1.0 | DNA-directed RNA-polymerase II (by homology)                                             | YIL021w  | orf19.8832  |
| CA0835 | IPF12498.53F | -1.0 | 1.1  | 1.1  | 1.0 | unknown function, internal fragment                                                      |          |             |
| CA5350 | IPF859       | 1.0  | 1.1  | 1.1  | 1.0 | unknown function                                                                         |          | orf19.7225  |
| CA4431 | ECM39        | 1.2  | -1.0 | 1.1  | 1.0 | cell wall biogenesis by homology                                                         | YNR030w  | orf19.5164  |
| CA0590 | IPF13079     | -1.1 | -1.0 | -1.0 | 1.0 | unknown function                                                                         | YDR336w  | orf19.8756  |
| CA2528 | MOB1         | 1.0  | 1.0  | -1.0 | 1.0 | required for completion of mitosis                                                       | YIL106w  | orf19.5528  |
| CA0739 | IPF18885     | 1.0  | -1.0 | 1.1  | 1.0 | similar to <i>Saccharomyces cerevisiae</i> Cdc91p cell divisio                           | YLR459w  | orf19.11816 |
| CA5502 | IPF763       | 1.1  | 1.2  | 1.1  | 1.0 | putative transcription factor with a Cys4- zinc finger (by                               | YKL185w  | orf19.5343  |
| CA2852 | ALS5         | 1.0  | 1.1  | 1.1  | 1.0 | agglutinin-like protein                                                                  |          | orf19.5736  |
| CA2642 | FTI1         | 1.1  | 1.0  | 1.0  | 1.0 | Rad52 inhibitor (by homology)                                                            | YKR035wa | orf19.4307  |
| CA5267 | IPF1787.5F   | 1.0  | 1.0  | 1.1  | 1.0 | unknown function, 5-prime end                                                            |          | orf19.4995  |
| CA1368 | IPF15969     | -1.0 | 1.0  | 1.0  | 1.0 | unknown function                                                                         |          | orf19.4965  |
| CA0778 | IPF12884     | 1.0  | 1.3  | 1.3  | 1.0 | unknown function                                                                         | YKR105c  | orf19.4779  |
| CA1412 | IPF11854     | -1.0 | 1.1  | 1.1  | 1.0 | unknown function                                                                         |          | orf19.1278  |
| CA2713 | IFF8         | 1.0  | 1.2  | 1.1  | 1.0 | unknown function                                                                         |          | orf19.570   |
| CA3602 | RPL14B.3     | 1.0  | -1.0 | -1.1 | 1.0 | ribosomal protein L14B, 3-prime end (by homology)                                        | YKL006w  |             |
| CA3310 | PFS2         | -1.0 | 1.0  | 1.2  | 1.0 | Polyadenylation Factor I subunit (by homology)                                           | YNL317w  | orf19.2307  |
| CA0656 | IPF12470     | -1.0 | -1.0 | -1.0 | 1.0 | unknown function                                                                         |          | orf19.5573  |
| CA4032 | IPF11081     | -1.0 | -1.0 | 1.0  | 1.0 | unknown function                                                                         |          |             |
| CA0232 | IFA1         | 1.1  | 1.0  | 1.1  | 1.0 | Unknown function                                                                         |          | orf19.156   |



|        |             |      |      |      |     |                                                                               |          |             |
|--------|-------------|------|------|------|-----|-------------------------------------------------------------------------------|----------|-------------|
| CA5342 | YPT521      | -1.0 | -1.0 | 1.0  | 1.0 | GTP-binding protein of the rab/ypt family (by homology)                       | YKR014c  | orf19.7216  |
| CA1297 | ACF2        | 1.0  | -1.0 | -1.1 | 1.0 | endo-1,3-beta-glucanase                                                       | YLR144c  | orf19.3417  |
| CA5166 | TYR1        | 1.0  | 1.0  | -1.0 | 1.0 | Prephenate dehydrogenase (NADP+) (by homology)                                | YBR166c  | orf19.4605  |
| CA3117 | IPF5363     | -1.1 | 1.0  | -1.0 | 1.0 | unknown function                                                              | YDR179wa | orf19.3009  |
| CA0286 | IPF14618    | 1.0  | 1.0  | 1.0  | 1.0 | unknown function                                                              |          | orf19.6079  |
| SCULP1 |             | 1.1  | 1.0  | 1.1  | 1.0 |                                                                               |          |             |
| CA3989 | IPF7147     | 1.1  | -1.0 | 1.0  | 1.0 | unknown function                                                              | YLR401c  | orf19.1565  |
| CA5087 | IPF20025    | -1.1 | 1.0  | -1.0 | 1.0 | unknown function                                                              | YKL033w  | orf19.3062  |
| CA4395 | EXM2        | -1.1 | 1.0  | 1.1  | 1.0 | EXit from Mitosis (by homology)                                               | YDL087c  | orf19.3116  |
| CA5747 | IPF2903     | -1.0 | 1.1  | 1.1  | 1.0 | unknown function                                                              |          | orf19.7456  |
| CA6023 | CDC33       | 1.1  | 1.0  | 1.1  | 1.0 | translation initiation factor eIF4E, cap binding protein                      | YOL139c  | orf19.7626  |
| CA5452 | SEC11       | 1.1  | 1.1  | 1.0  | 1.0 | signal peptidase subunit (by homology)                                        | YIR022w  | orf19.3259  |
| CA5895 | ISA2        | 1.1  | 1.1  | 1.1  | 1.0 | Mitochondrial protein required for iron metabolism (by homology)              | YPR067w  | orf19.6811  |
| CA1080 | IPF14710    | -1.0 | -1.1 | 1.0  | 1.0 | unknown function                                                              | YKL162c  | orf19.4820  |
| CA2475 | IPF3233     | 1.0  | 1.2  | 1.1  | 1.0 | unknown function                                                              |          | orf19.2878  |
| CA1251 | IPF9624     | 1.1  | -1.0 | 1.0  | 1.0 | similar to <i>Saccharomyces cerevisiae</i> Ecm25p involved in iron metabolism |          | orf19.12423 |
| CA2254 | IPF15487    | 1.0  | 1.0  | 1.0  | 1.0 | unknown function                                                              |          | orf19.1958  |
| CA2233 | IFJ3        | 1.0  | -1.0 | -1.0 | 1.0 | unknown function                                                              |          | orf19.3924  |
| CA0955 | IPF13160    | 1.1  | -1.0 | 1.0  | 1.0 | unknown function                                                              |          | orf19.1140  |
| CA3306 | IPF11738    | 1.0  | -1.0 | -1.0 | 1.0 | unknown function                                                              | YFR032c  | orf19.2310  |
| CA1663 | IPF7309     | -1.1 | -1.0 | 1.0  | 1.0 | unknown function                                                              | YGL101w  | orf19.2864  |
| CA3762 | IPF13135    | 1.0  | 1.0  | 1.1  | 1.0 | unknown function                                                              |          | orf19.2907  |
| CA5600 | IPF559      | -1.1 | -1.0 | 1.2  | 1.0 | unknown function                                                              | YJR001w  | orf19.7100  |
| CA1717 | IPF9315     | 1.1  | 1.2  | 1.2  | 1.0 | putative CCAAT-binding factor subunit (by homology)                           |          | orf19.4647  |
| CA1122 | PMS1.3      | -1.0 | -1.1 | -1.1 | 1.0 | DNA mismatch repair protein, 3-prime end (by homology)                        | YNL082w  | orf19.1605  |
| CA5069 | IPF3593     | 1.0  | 1.1  | 1.1  | 1.0 | unknown function                                                              |          | orf19.3042  |
| CA3510 | MAD1        | -1.0 | 1.0  | -1.0 | 1.0 | coiled-coil protein involved in the spindle-assembly checkpoint               | YGL086w  | orf19.6357  |
| CA4581 | IPF2232     | 1.0  | 1.0  | 1.0  | 1.0 | unknown function                                                              |          | orf19.6899  |
| CA0215 | IPF15350    | 1.1  | 1.0  | 1.0  | 1.0 | putative zinc finger transcription factor (by homology)                       | YDR207c  | orf19.2745  |
| CA3315 | IPF8814     | 1.0  | 1.0  | 1.2  | 1.0 | unknown function                                                              |          | orf19.2302  |
| CA3496 | IPF17064    | -1.0 | 1.0  | 1.0  | 1.0 | unknown function                                                              |          | orf19.6342  |
| CA4028 | IPF7171.3F  | 1.0  | -1.0 | -1.1 | 1.0 | unknown function, 3-prime end                                                 |          | orf19.3435  |
| CA2819 | RPA1        | -1.0 | 1.0  | -1.0 | 1.0 | 60S ribosomal protein                                                         | YDL081c  | orf19.2992  |
| CA1019 | IPF13485    | -1.1 | -1.0 | 1.1  | 1.0 | unknown function                                                              | YNR039c  | orf19.3769  |
| CA2143 | IPF12803    | -1.1 | 1.0  | -1.0 | 1.0 | unknown function                                                              |          | orf19.10048 |
| CA2317 | IPF13586    | 1.0  | 1.0  | -1.1 | 1.0 | unknown function                                                              |          | orf19.5479  |
| CA1866 | IPF7647     | -1.0 | -1.0 | 1.2  | 1.0 | unknown function                                                              |          | orf19.860   |
| CA4316 | IPF2111     | -1.0 | 1.0  | 1.0  | 1.0 | unknown function                                                              | YJR141w  | orf19.4106  |
| CA1614 | IPF18645    | -1.1 | -1.0 | -1.0 | 1.0 | unknown function                                                              |          | orf19.10728 |
| CA3767 | NUP60       | -1.1 | 1.1  | -1.0 | 1.0 | Putative nuclear pore protein (by homology)                                   | YAR002w  | orf19.2901  |
| CA0402 | IPF15225    | 1.0  | 1.1  | 1.1  | 1.0 | Sorting nexin-like protein (by homology)                                      | YJL036w  | orf19.1990  |
| CA3577 | IPF11106    | 1.1  | -1.0 | -1.0 | 1.0 | unknown function                                                              |          | orf19.2263  |
| CA5745 | TAF60       | -1.0 | 1.0  | -1.0 | 1.0 | TATA-binding protein-associated-factor (by homology)                          | YGL112c  | orf19.7454  |
| CA0973 | IPF12662    | 1.3  | 1.1  | 1.2  | 1.0 | unknown function                                                              |          | orf19.6474  |
| CA3890 | TERT2       | -1.1 | -1.0 | -1.1 | 1.0 | telomerase reverse transcriptase 2                                            | YLR318w  | orf19.5089  |
| CA0837 | IPF12495.3F | -1.0 | -1.0 | 1.1  | 1.0 | unknown function, 3-prime end                                                 |          |             |
| CA2514 | FUR4        | 1.0  | 1.1  | 1.1  | 1.0 | Probable uracile or allantoin permease (by homology)                          | YIR028w  | orf19.313   |
| CA0690 | IPF18901.3  | 1.0  | 1.1  | 1.0  | 1.0 | unknown function, 3-prime end                                                 |          |             |
| CA1941 | IPF7998     | -1.0 | -1.0 | -1.0 | 1.0 | Ribosomal protein L24 (by homology)                                           | YLR009w  | orf19.4191  |

|        |              |      |      |      |     |                                                              |                  |             |
|--------|--------------|------|------|------|-----|--------------------------------------------------------------|------------------|-------------|
| CA3363 | FRE32        | 1.1  | 1.0  | 1.0  | 1.0 | ferric reductase (by homology)                               | YOR381w          | orf19.9488  |
| CA0767 | KEM1.3       | -1.1 | -1.0 | -1.1 | 1.0 | multifunctional nuclease, 3-prime end (by homology)          | YGL173c          | orf19.12434 |
| CA3664 | IPF11433.3F  | 1.1  | -1.0 | 1.0  | 1.0 | unknown function, 3-prime end                                | YKL207w          | orf19.6462  |
| CA1411 | IPF11858     | 1.0  | 1.1  | 1.3  | 1.0 | unknown function                                             |                  | orf19.1277  |
| CA4573 | IPF9431      | 1.0  | 1.1  | 1.2  | 1.0 | unknown function                                             | YJL091c          | orf19.6884  |
| CA3152 | IPF4032      | 1.0  | -1.0 | -1.0 | 1.0 | unknown function                                             |                  | orf19.6168  |
| CA4375 | IPF11309     | 1.1  | -1.1 | -1.1 | 1.0 | unknown function                                             | YMR039c          | orf19.5666  |
| CA3453 | SEC23        | -1.1 | 1.2  | 1.0  | 1.0 | Component of COPII coat (by homology)                        | YPR181c          | orf19.1254  |
| CA3366 | FRE43        | -1.1 | -1.0 | 1.2  | 1.0 | ferric reductase-like (by homology)                          |                  | orf19.9403  |
| CA5334 | SMK1         | -1.0 | 1.1  | -1.0 | 1.0 | MAP kinase (by homology)                                     | YPR054w          | orf19.7208  |
| CA5623 | IPF502       | 1.0  | 1.0  | -1.0 | 1.0 | unknown function                                             | YCL010c          | orf19.7074  |
| CA3672 | IPF13669     | 1.0  | -1.0 | -1.0 | 1.0 | unknown function                                             |                  | orf19.6456  |
| CA0040 | IPF15632     | 1.1  | -1.0 | 1.0  | 1.0 | unknown function                                             |                  | orf19.10973 |
| CA4518 | SPT14        | -1.1 | 1.0  | 1.0  | 1.0 | N-acetylglucosaminyl-phosphatidylinositol biosynthetic       | YPL175w          | orf19.487   |
| CA4406 | YDC1         | 1.1  | 1.0  | 1.3  | 1.0 | alkaline dihydroceramidase (by homology)                     | YPL087w          | orf19.3104  |
| CA3282 | IPF6272      | 1.0  | 1.0  | -1.0 | 1.0 | unknown function                                             |                  | orf19.6315  |
| CA2759 | ARP4         | 1.1  | -1.0 | 1.1  | 1.0 | actin-related protein (by homology)                          | YJL081c          | orf19.13069 |
| NAD3   |              | 1.1  | 1.0  | -1.1 | 1.0 |                                                              |                  |             |
| CA4052 | PF10231.EXON | 1.0  | -1.1 | -1.2 | 1.0 | similar to <i>Saccharomyces cerevisiae</i> Rif1p Rap1p-inter | YBR275c          | orf19.427   |
| CA3294 | IPF5725      | 1.0  | 1.0  | 1.0  | 1.0 | unknown function                                             | YDR511w          | orf19.6328  |
| CA4261 | PDX3         | -1.1 | 1.0  | -1.0 | 1.0 | pyridoxamine-phosphate oxidase (by homology)                 | YBR035c          | orf19.550   |
| CA0884 | CAN5         | 1.1  | 1.1  | 1.2  | 1.0 | amino acid permease (by homology)                            |                  | orf19.3641  |
| CA0379 | SSP120       | 1.0  | 1.0  | -1.0 | 1.0 | secretory protein (by homology)                              | YLR250w          | orf19.3173  |
| CA1953 | IPF3899      | 1.1  | 1.0  | 1.0  | 1.0 | similar to <i>Saccharomyces cerevisiae</i> Cbc2p small subu  | YPL178w          | orf19.763   |
| CA5446 | LAG1         | 1.3  | -1.0 | 1.3  | 1.0 | longevity-assurance protein (by homology)                    | YHL003c          | orf19.3249  |
| CA3954 | YFH1         | 1.0  | 1.0  | -1.0 | 1.0 | Regulates mitochondrial iron accumulation (by homolog        | YDL120w          | orf19.1413  |
| CA0789 | ESP1         | -1.0 | 1.0  | 1.1  | 1.0 | Required for sister chromatid separation (by homology)       | YGR098c          | orf19.3356  |
| CA3040 | IPF7306      | 1.0  | 1.1  | 1.1  | 1.0 | putative permease (by homology)                              | YBR241c          | orf19.2425  |
| CA2063 | IPF7859      | -1.0 | -1.0 | 1.0  | 1.0 | unknown function                                             |                  | orf19.2564  |
| CA4915 | IPF1427      | -1.0 | 1.1  | 1.2  | 1.0 | Similar to ubiquitination protein Bul1p (by homology)        |                  | orf19.6055  |
| CA0242 | IPF12047     | 1.1  | -1.0 | 1.0  | 1.0 | unknown function                                             |                  | orf19.3471  |
| CA3614 | IPF8878      | -1.0 | 1.1  | 1.1  | 1.0 | unknown function                                             |                  | orf19.31    |
| CA5017 | IPF7559      | 1.0  | -1.0 | 1.1  | 1.0 | unknown function                                             |                  | orf19.6970  |
| CA5387 | CTA24.3      | -1.0 | -1.1 | -1.0 | 1.0 | transcriptional activator, 3-prime end                       |                  |             |
| CA0696 | HMT1         | 1.0  | 1.1  | 1.1  | 1.0 | hnRNP methyltransferase (by homology)                        | YBR034c          | orf19.3291  |
| CA4906 | MOB2         | -1.0 | 1.1  | 1.1  | 1.0 | Required for maintenance in ploidy                           | YFL034cb         | orf19.6044  |
| CA1360 | IPF14598     | 1.1  | -1.0 | 1.1  | 1.0 | unknown function                                             |                  | orf19.4404  |
| CA3470 | IPF6310      | 1.1  | 1.0  | 1.0  | 1.0 | unknown function                                             |                  | orf19.1666  |
| CA1806 | IPF6329      | 1.0  | -1.0 | 1.0  | 1.0 | unknown function                                             |                  | orf19.1113  |
| CA2792 | TRK1.3F      | -1.0 | -1.0 | 1.0  | 1.0 | Potassium transporter, 3-prime end                           | Missing in array | orf19.602   |
| CA3062 | IPF2968      | 1.0  | 1.0  | 1.0  | 1.0 | unknown function                                             |                  | orf19.11762 |
| CA5908 | IPF5960      | -1.0 | 1.0  | -1.0 | 1.0 | unknown function                                             |                  | orf19.6797  |
| CA1028 | IPF6488      | -1.1 | 1.0  | -1.0 | 1.0 | unknown function                                             |                  | orf19.1539  |
| CA5706 | IPF2649      | 1.0  | 1.1  | -1.1 | 1.0 | unknown function                                             |                  | orf19.7406  |
| CA0478 | YAE8         | -1.0 | 1.0  | -1.1 | 1.0 | GTP-binding protein (by homology)                            | YAL048c          | orf19.13437 |
| CA0534 | IPF15607     | 1.1  | 1.1  | 1.1  | 1.0 | unknown function                                             | YDR412w          | orf19.5066  |
| CA1231 | IPF11817     | -1.1 | -1.0 | 1.0  | 1.0 | unknown function                                             | YDL206w          | orf19.4981  |
| CA0509 | CDC24        | -1.1 | 1.2  | -1.0 | 1.0 | GTP/GDP exchange factor for Cdc42p (by homology)             | YAL041w          | orf19.10684 |
| CA0060 | IPF13661     | 1.0  | -1.1 | -1.1 | 1.0 | unknown function                                             | YHR114w          | orf19.1699  |

|        |             |      |      |      |     |                                                               |                        |
|--------|-------------|------|------|------|-----|---------------------------------------------------------------|------------------------|
| CA4727 | IPF12253    | 1.1  | 1.0  | -1.0 | 1.0 | unknown function                                              |                        |
| CA1049 | TLG1        | 1.0  | 1.1  | 1.0  | 1.0 | tSNARE that affects a Late Golgi compartment (by hom          | orf19.3898             |
| CA4249 | IPF4293     | 1.0  | 1.1  | 1.1  | 1.0 | similar to <i>Saccharomyces cerevisiae</i> Gpi2p N-acetylglu  | orf19.538              |
| CA0598 | IPF9703     | 1.1  | 1.0  | 1.1  | 1.0 | unknown function                                              | orf19.12344            |
| CA4977 | IPF4710     | -1.0 | -1.1 | -1.1 | 1.0 | unknown Function                                              | YLR181c<br>orf19.5275  |
| CA0594 | IPF8860     | 1.0  | -1.0 | -1.0 | 1.0 | similar to <i>Saccharomyces cerevisiae</i> Gpi12p N-acetylglu | orf19.12368            |
| CA3934 | IPF17119    | -1.1 | 1.0  | -1.1 | 1.0 | unknown function                                              | YPR118w<br>orf19.2008  |
| CA1245 | IMH3.EXON2  | 1.0  | -1.1 | 1.1  | 1.0 | IMP dehydrogenase, exon 2                                     | YLR432w<br>orf19.7689  |
| CA1255 | IPF9030     | -1.0 | -1.0 | -1.0 | 1.0 | unknown function                                              | YGR277c<br>orf19.1776  |
| CA1319 | IPF3144     | 1.0  | 1.1  | 1.1  | 1.0 | unknown function                                              | YPR172w<br>orf19.4220  |
| CA4365 | PF5268.EXON | -1.0 | 1.1  | 1.0  | 1.0 | choline monoxygenase, exon 1 (by homology)                    | orf19.5656             |
| CA1162 | IPF10258    | -1.0 | -1.0 | -1.0 | 1.0 | similar to <i>Saccharomyces cerevisiae</i> Rad24p cell cycle  | YER173w<br>orf19.2728  |
| CA2775 | POP5        | 1.0  | -1.0 | 1.0  | 1.0 | subunit of RNase P- like by homology                          | YAL033w<br>orf19.275   |
| CA0714 | IPF9480     | 1.0  | 1.0  | 1.2  | 1.0 | unknown function                                              | orf19.3394             |
| CA5560 | THI13       | 1.0  | -1.0 | 1.0  | 1.0 | Pyrimidine precursor biosynthesis enzyme (by homolog          | YDL244w<br>orf19.7324  |
| CA4557 | IPF8043     | 1.5  | -1.1 | 1.1  | 1.0 | unknown function                                              | orf19.6867             |
| CA4386 | IPF12412    | -1.0 | 1.1  | 1.0  | 1.0 | unknown function                                              | orf19.3125             |
| CA1727 | IPF8448     | -1.0 | 1.0  | 1.1  | 1.0 | unknown function                                              | orf19.13846            |
| CA5836 | IPF428      | 1.1  | 1.0  | 1.2  | 1.0 | transport protein (by homology)                               | YOL137w<br>orf19.7490  |
| CA2763 | DIC1.3      | 1.0  | -1.1 | -1.1 | 1.0 | dicarboxylate carrier protein, 3-prime end (by homology)      | YLR348c<br>orf19.5628  |
| CA3450 | PDE2        | -1.0 | 1.1  | -1.0 | 1.0 | Nucleotide phosphodiesterase                                  | YOR360c<br>orf19.2972  |
| CA4494 | VMA1        | 1.1  | 1.0  | 1.0  | 1.0 | vacuolar ATPase V1 domain subunit G                           | YHR039ca<br>orf19.1866 |
| CA4215 | SSY1        | 1.0  | 1.1  | 1.1  | 1.0 | Regulator of transporters (by homology)                       | YDR160w<br>orf19.8434  |
| CA5442 | IPF18105.3F | -1.1 | 1.1  | -1.1 | 1.0 | unknown function, 3-prime end                                 | orf19.3245             |
| CA1960 | IPF15232    | 1.0  | 1.0  | -1.0 | 1.0 | unknown function                                              | YNL224c<br>orf19.2400  |
| CA4133 | IPF7010.3   | 1.0  | 1.1  | 1.1  | 1.0 | unknown function, 3-prime end                                 | orf19.4241             |
| CA5533 | IPF2846     | 1.0  | 1.0  | -1.0 | 1.0 | similar to <i>Saccharomyces cerevisiae</i> Mps1p serine/thre  | YDL028c<br>orf19.7293  |
| CA3146 | IPF9797     | 1.1  | 1.1  | 1.0  | 1.0 | unknown function                                              | YER093ca<br>orf19.6156 |
| CA4197 | IPF8057     | 1.0  | -1.0 | 1.0  | 1.0 | similar to <i>Saccharomyces cerevisiae</i> Rna15p componer    | YGL044c<br>orf19.4538  |
| CA1795 | IPF11261    | -1.1 | -1.0 | 1.0  | 1.0 | unknown function                                              | YNL041c<br>orf19.5209  |
| CA4122 | PBI2        | 1.0  | 1.1  | 1.0  | 1.0 | proteinase B inhibitor 2 (by homology)                        | YNL015w<br>orf19.2769  |
| CA2465 | IPF8726     | 1.0  | -1.1 | 1.2  | 1.0 | unknown function                                              | YLL013c<br>orf19.1795  |
| CA2037 | IFF3        | -1.0 | -1.0 | 1.0  | 1.0 | unknown function                                              | orf19.11839            |
| CA4258 | IPF4279     | -1.1 | 1.0  | 1.1  | 1.0 | unknown function                                              | YKL113c<br>orf19.547   |
| CA1462 | THI80       | 1.1  | -1.0 | 1.0  | 1.0 | Thiamin pyrophosphokinase (by homology)                       | YOR143c<br>orf19.8707  |
| CA5345 | FTR1        | 1.1  | 1.1  | 1.2  | 1.0 | high affinity iron permease                                   | YER145c<br>orf19.7219  |
| CA3698 | IPF4861     | -1.0 | 1.0  | 1.0  | 1.0 | unknown function                                              | orf19.6274             |
| CA6153 | CUP5        | 1.0  | 1.0  | 1.1  | 1.0 | Vacuolar H+-ATPase (by homology)                              | orf19.5886             |
| CA4344 | IPF3631     | -1.1 | 1.0  | 1.0  | 1.0 | unknown function                                              | orf19.6718             |
| CA3973 | IPF6505     | 1.2  | 1.1  | 1.3  | 1.0 | unknown function                                              | YMR158w<br>orf19.1545  |
| CA4341 | IPF3624     | -1.0 | 1.1  | 1.1  | 1.0 | unknown function                                              | orf19.6713             |
| CA5115 | IPF1331     | 1.0  | 1.0  | 1.0  | 1.0 | unknown function                                              | YNL080c<br>orf19.6416  |
| CA0799 | IPF14825    | -1.0 | -1.0 | -1.0 | 1.0 | unknown function                                              | orf19.9178             |
| CA2592 | IPF18447    | 1.1  | 1.0  | -1.0 | 1.0 | putative zinc-finger protein (by homology)                    | YBR267w<br>orf19.59    |
| CA3897 | PFY1        | 1.2  | -1.0 | 1.0  | 1.0 | BINDS TO ACTIN                                                | YOR122c<br>orf19.5076  |
| CA4000 | IPF4262     | -1.0 | 1.0  | 1.1  | 1.0 | similar to <i>Saccharomyces cerevisiae</i> Ste50p pheromont   | YCL032w<br>orf19.1636  |
| CA0855 | AMYG1       | 1.0  | 1.0  | 1.0  | 1.0 | glucoamylase                                                  | orf19.4899             |
| CA3720 | IFL3        | -1.0 | -1.0 | 1.0  | 1.0 | Unknown function                                              | orf19.11646            |
| CA4851 | IPF5818     | 1.1  | 1.0  | 1.0  | 1.0 | unknown function                                              | orf19.3821             |

|        |            |      |      |      |     |                                                                   |         |             |
|--------|------------|------|------|------|-----|-------------------------------------------------------------------|---------|-------------|
| CA3567 | IPF7804.5F | -1.0 | 1.0  | 1.1  | 1.0 | unknown function, 5-prime end                                     |         | orf19.3134  |
| CA0859 | IPF14495.3 | -1.0 | -1.0 | -1.0 | 1.0 | similar to <i>Saccharomyces cerevisiae</i> Erf2p involved in p    | YLR246w | orf19.11946 |
| CA1509 | IPF19920.3 | -1.0 | 1.0  | 1.0  | 1.0 | unknown function, 3-prime end                                     |         | orf19.4524  |
| CA0561 | CIN4       | -1.0 | 1.0  | 1.0  | 1.0 | GTP-binding protein                                               | YMR138w | orf19.2925  |
| CA3137 | IPF8976    | -1.1 | 1.1  | 1.2  | 1.0 | unknown function                                                  |         | orf19.8949  |
| CA1698 | IPF15681   | 1.0  | 1.0  | 1.1  | 1.0 | unknown function                                                  |         | orf19.5045  |
| CA2657 | IPF8486    | 1.1  | -1.0 | 1.1  | 1.0 | unknown function                                                  |         | orf19.5710  |
| CA5009 | VPH2       | -1.1 | -1.1 | -1.0 | 1.0 | H <sup>+</sup> -ATPase assembly protein (by homology)             | YKL119c | orf19.5237  |
| CA4085 | IPF5015    | -1.1 | 1.1  | 1.0  | 1.0 | unknown function                                                  |         | orf19.6641  |
| CA4488 | MEK1.3F    | -1.0 | 1.0  | 1.0  | 1.0 | serine/threonine protein kinase, 3-prime end                      | YOR351c | orf19.1875  |
| CA5386 | ZORRO2B.5F | 1.0  | 1.0  | -1.1 | 1.0 | Putative gag protein, 5-prime end                                 |         | orf19.7277  |
| CA1316 | IPF14587.3 | 1.1  | -1.0 | 1.0  | 1.0 | unknown function, 3-prime end                                     |         |             |
| CA4116 | IDI1       | 1.2  | -1.0 | 1.0  | 1.0 | isopentenyl-diphosphate delta-isomerase (by homology)             | YPL117c | orf19.2775  |
| CA3616 | ASN1       | -1.1 | 1.0  | 1.1  | 1.0 | asparagine synthetase (by homology)                               | YPR145w |             |
| CA3748 | IPF7385    | 1.3  | -1.0 | 1.2  | 1.0 | unknown function                                                  |         | orf19.3430  |
| CA5763 | IFF10.5    | 1.0  | 1.1  | -1.0 | 1.0 | unknown function, 5-prime end                                     |         | orf19.5404  |
| CA1154 | MET221     | 1.0  | -1.0 | -1.0 | 1.0 | protein ser/thr phosphatase (by homology)                         | YOL064c | orf19.105   |
| CA3343 | IPF13360   | -1.0 | 1.0  | 1.1  | 1.0 | unknown function                                                  |         | orf19.2328  |
| CA1730 | IPF8439    | 1.0  | 1.1  | 1.0  | 1.0 | unknown function                                                  | YDL115c | orf19.6498  |
| CA1174 | IPF14255   | 1.0  | -1.0 | -1.0 | 1.0 | unknown function                                                  |         | orf19.4767  |
| CA3130 | TIM23      | 1.1  | -1.0 | 1.0  | 1.0 | mitochondrial inner membrane import translocase subunit           | YNR017w | orf19.1361  |
| CA4520 | CDC31      | -1.0 | 1.0  | 1.0  | 1.0 | spindle pole body component, centrin (by homology)                | YOR257w | orf19.485   |
| CA3145 | CDC9       | -1.1 | 1.0  | 1.1  | 1.0 | DNA ligase (by homology)                                          | YDL164c | orf19.6155  |
| CA3250 | IPF4716    | 1.1  | 1.1  | 1.3  | 1.0 | unknown function                                                  |         | orf19.11220 |
| CA1936 | PCT1       | -1.2 | 1.0  | -1.0 | 1.0 | cholinephosphate cytidyltransferase (by homology)                 | YGR202c | orf19.4186  |
| CA5339 | IPF885     | 1.1  | 1.0  | 1.1  | 1.0 | glucan 1,3-beta-glucosidase (by homology)                         | YBR056w | orf19.7214  |
| CA4601 | IPF2195    | -1.0 | 1.0  | 1.0  | 1.0 | unknown function                                                  |         | orf19.6920  |
| CA0034 | IPF8016    | 1.1  | 1.0  | 1.0  | 1.0 | unknown function                                                  |         |             |
| CA6156 | GEF1.3F    | -1.1 | 1.2  | 1.0  | 1.0 | Voltage-gated chloride channel protein, 3-prime end (by homology) |         | orf19.5881  |
| CA1809 | IPF6325    | 1.1  | 1.0  | -1.0 | 1.0 | unknown function                                                  |         | orf19.1116  |
| CA2983 | IPF18396   | 1.1  | 1.0  | 1.1  | 1.0 | unknown function                                                  |         | orf19.8814  |
| CA3991 | VAM6.5F    | -1.1 | -1.0 | -1.0 | 1.0 | Vacuolar carboxypeptidase Y, 5-prime end (by homology)            |         | orf19.1567  |
| CA1108 | IPF11273   | 1.0  | -1.0 | -1.0 | 1.0 | unknown function                                                  |         | orf19.12696 |
| CA6121 | IPF33      | 1.0  | 1.0  | 1.0  | 1.0 | unknown function                                                  |         | orf19.5929  |
| CA4687 | IPF9017    | -1.0 | -1.0 | 1.0  | 1.0 | similar to <i>Saccharomyces cerevisiae</i> She4p required for     | YOR035c | orf19.879   |
| CA3043 | DOM34      | -1.0 | -1.0 | -1.1 | 1.0 | probable involvement in meiotic and mitotic division              | YNL001w | orf19.2419  |
| CA5903 | IPF5942    | 1.1  | 1.1  | 1.1  | 1.0 | transmembrane sugar transporter (by homology)                     | YPL244c | orf19.6803  |
| CA3916 | IPF3274    | 1.0  | 1.0  | -1.0 | 1.0 | Unknown function                                                  | YOR258w | orf19.4383  |
| CA2790 | IPF3562    | 1.1  | 1.0  | 1.0  | 1.0 | Unknown function                                                  |         | orf19.604   |
| CA2874 | IPF4999    | 1.1  | 1.1  | 1.0  | 1.0 | unknown function                                                  |         | orf19.5843  |
| CA2346 | SEF1       | 1.1  | 1.0  | 1.0  | 1.0 | Putative transcription factor1                                    | YBL066c | orf19.3753  |
| CA6096 | IPF56      | 1.0  | 1.0  | -1.1 | 1.0 | similar to <i>Saccharomyces cerevisiae</i> Nas6p subunit of 2     | YGR232w | orf19.5961  |
| CA0389 | IPF14465   | -1.0 | -1.0 | 1.1  | 1.0 | unknown function                                                  |         | orf19.1910  |
| CA4144 | IPF13340   | -1.1 | -1.1 | 1.0  | 1.0 | unknown function                                                  | YOR164c | orf19.4228  |
| CA2809 | AMO1       | 1.0  | 1.0  | 1.1  | 1.0 | amine oxidase (by homology)                                       |         | orf19.5784  |
| CA0228 | IPT1       | 1.0  | 1.1  | 1.0  | 1.0 | Mannosyl diphosphorylinositol ceramide (by homology)              | YDR072c | orf19.12233 |
| CA3745 | MAF1       | -1.0 | -1.1 | 1.1  | 1.0 | nuclear protein by homology                                       | YDR005c | orf19.2173  |
| Cox 2  |            | 1.0  | 1.0  | -1.0 | 1.0 |                                                                   |         |             |
| CA3408 | IPF9407    | 1.2  | -1.1 | -1.1 | 1.0 | similar to <i>Saccharomyces cerevisiae</i> Arc15p subunit of 1    | YIL062c | orf19.6151  |

|        |              |      |      |      |     |                                                                                               |             |
|--------|--------------|------|------|------|-----|-----------------------------------------------------------------------------------------------|-------------|
| CA5041 | FRP7         | 1.1  | -1.0 | 1.1  | 1.0 | member of the FRP family of proteins related to <i>Yarrowia lipolytica</i> glyoxylate pathway | orf19.6995  |
| CA1732 | ECM42        | 1.0  | 1.0  | 1.1  | 1.0 | Acetylornithine acetyltransferase (by homology) YMR062c                                       | orf19.6500  |
| CA0686 | IPF162       | -1.2 | -1.1 | 1.0  | 1.0 | sulphate transporter (by homology) YGR125w                                                    | orf19.3222  |
| CA1829 | IPF17177.3F  | 1.1  | 1.1  | 1.1  | 1.0 | similar to <i>Saccharomyces cerevisiae</i> Srm1p regulator of YGL097w                         | orf19.5184  |
| CA3213 | IPF8160      | 1.0  | -1.0 | -1.1 | 1.0 | unknown function YML003w                                                                      | orf19.6205  |
| CA3806 | IPF9224      | -1.1 | 1.0  | -1.0 | 1.0 | similar to <i>Saccharomyces cerevisiae</i> Nup170p nuclear pore YBL079w                       | orf19.2485  |
| CA0214 | SCT11        | 1.0  | 1.1  | 1.1  | 1.0 | Suppresses a choline-transport mutant YBL011w                                                 | orf19.1289  |
| CA0092 | IPF8268.3F   | 1.0  | 1.0  | -1.0 | 1.0 | member of the FRP family of proteins related to <i>Yarrowia lipolytica</i> glyoxylate pathway | orf19.1571  |
| CA6016 | IPF630       | 1.1  | 1.0  | -1.1 | 1.0 | unknown function YOR145c                                                                      | orf19.7618  |
| CA2826 | APL6         | -1.0 | 1.0  | 1.1  | 1.0 | AP-3 complex subunit, beta3-adaptin (by homology) YGR261c                                     | orf19.1323  |
| CA3482 | COQ5         | 1.1  | 1.0  | -1.0 | 1.0 | C-methyltransferase (by homology) YML110c                                                     | orf19.3577  |
| CA4871 | IPF1680      | -1.0 | 1.0  | 1.0  | 1.0 | probable amidase YDR242w                                                                      | orf19.6557  |
| CA2355 | TPK1         | 1.0  | -1.0 | 1.1  | 1.0 | cAMP-dependent protein kinase 2 (by homology)                                                 | orf19.12357 |
| CA2221 | IPF9670      | 1.0  | 1.2  | 1.1  | 1.0 | membrane transporter of the ATP-binding cassette (ABC) superfamily involved in met            | orf19.5100  |
| CA4293 | IFA8         | 1.0  | 1.1  | 1.0  | 1.0 | Unknown function                                                                              | orf19.6690  |
| CA3770 | SOU2         | 1.1  | 1.1  | 1.1  | 1.0 | Sorbitol utilization protein Sou2p [ <i>Candida albicans</i> ]                                | orf19.2897  |
| CA3436 | NRD1         | -1.0 | 1.0  | 1.0  | 1.0 | Involved in regulation of nuclear pre-mRNA abundance YNL251c                                  | orf19.581   |
| CA4940 | CRN1.3F      | 1.0  | -1.0 | 1.1  | 1.0 | actin-binding protein, 3-prime end (by homology)                                              | orf19.6535  |
| CA4283 | IFJ4         | -1.0 | -1.0 | 1.0  | 1.0 | Unknown function                                                                              | orf19.6681  |
| CA0705 | IPF11804     | -1.0 | 1.0  | 1.1  | 1.0 | unknown function                                                                              | orf19.10433 |
| CA4137 | CNA1         | 1.1  | -1.0 | 1.0  | 1.0 | cyclic nucleotide phosphodiesterase YGL248w                                                   | orf19.4235  |
| 9290.2 |              | -1.0 | 1.1  | 1.2  | 1.0 |                                                                                               |             |
| CA0753 | IPF10359     | -1.0 | -1.0 | -1.0 | 1.0 | unknown function YMR135c                                                                      | orf19.11287 |
| CA0469 | IPF18977     | 1.0  | -1.0 | -1.0 | 1.0 | similar to <i>Saccharomyces cerevisiae</i> Smb1p associated YER029c                           | orf19.2621  |
| CA5031 | IPF20023     | 1.0  | 1.0  | 1.1  | 1.0 | similar to <i>Saccharomyces cerevisiae</i> Tea1p activator of YOR337w                         | orf19.6985  |
| CA4333 | IPF2083      | 1.1  | -1.0 | 1.0  | 1.0 | unknown function YNL056w                                                                      | orf19.4086  |
| CA2478 | DAL52        | -1.1 | 1.0  | 1.0  | 1.0 | allantoate permease (by homology)                                                             | orf19.3208  |
| CA4404 | MET16        | 1.1  | -1.0 | -1.1 | 1.0 | 3-phosphoadenylylsulfate reductase (by homology) YPR167c                                      | orf19.3106  |
| CA2900 | NIP7         | 1.2  | 1.1  | 1.0  | 1.0 | required for efficient 60S ribosome subunit biogenesis (YPL211w                               | orf19.3478  |
| CA3406 | IPF9711      | 1.0  | 1.1  | -1.0 | 1.0 | unknown function YGR266w                                                                      | orf19.3983  |
| CA0235 | HIS3         | 1.0  | 1.0  | 1.1  | 1.0 | imidazole glycerol phosphate dehydratase YOR202w                                              | orf19.7813  |
| CA0838 | TFP1         | -1.3 | -1.1 | 1.1  | 1.0 | vacuolar ATPase subunit (by homology) YDL185w                                                 | orf19.9249  |
| CA4642 | IPF1500      | -1.1 | -1.0 | 1.0  | 1.0 | similar to <i>Saccharomyces cerevisiae</i> Nca2p regulating YPR155c                           | orf19.349   |
| CA1799 | IPF11446     | 1.0  | 1.0  | 1.1  | 1.0 | unknown function                                                                              | orf19.2922  |
| CA0738 | SEC16.3F     | 1.1  | 1.1  | 1.0  | 1.0 | Multidomain vesicle coat protein, 3-prime end (by homology)                                   | orf19.11819 |
| CA0288 | IPF14614     | -1.0 | 1.1  | -1.0 | 1.0 | unknown function                                                                              |             |
| CA5563 | PHO88        | 1.2  | -1.0 | -1.1 | 1.0 | Involved in phosphate transport (by homology) YBR106w                                         | orf19.7327  |
| CA3922 | GRD19        | -1.0 | 1.1  | 1.1  | 1.0 | Probable golgi membrane protein-sorting protein (by ho YOR357c                                | orf19.5114  |
| CA1449 | PF14730.5EOC | 1.0  | 1.0  | 1.0  | 1.0 | unknown function, 5-prime end                                                                 | orf19.193   |
| CA2472 | IPF3239      | 1.0  | 1.0  | -1.0 | 1.0 | unknown function                                                                              | orf19.2875  |
| CA2766 | IPF18416     | 1.0  | 1.0  | -1.0 | 1.0 | unknown function                                                                              | orf19.13076 |
| CA4290 | IPF2617      | -1.0 | 1.0  | 1.0  | 1.0 | unknown function                                                                              | orf19.6687  |
| CA1351 | PCL2         | 1.0  | -1.1 | 1.0  | 1.0 | G1/S specific cyclin YDL127w                                                                  | orf19.403   |
| CA6086 | PHB2         | -1.0 | -1.2 | -1.3 | 1.0 | Mitochondrial protein, prohibitin homolog (by homology) YGR231c                               | orf19.5973  |
| CA3398 | IPF13621     | 1.0  | 1.0  | -1.0 | 1.0 | unknown function YGR268c                                                                      | orf19.3973  |
| CA1800 | IPF11445     | -1.0 | 1.0  | -1.0 | 1.0 | similar to <i>Saccharomyces cerevisiae</i> Pac2p involved in YER007w                          | orf19.2921  |
| CA4423 | LIP9.EXON1   | 1.0  | -1.1 | -1.1 | 1.0 | secretory lipase 9, exon 1                                                                    | orf19.5172  |
| CA3634 | IFA25        | 1.0  | 1.0  | 1.1  | 1.0 | unknown function                                                                              | orf19.5140  |
| CA3578 | IPF11105     | 1.1  | 1.1  | 1.1  | 1.0 | probable quinone oxidoreductase YBR046c                                                       | orf19.2262  |



|        |              |      |      |      |     |                                                               |                            |             |
|--------|--------------|------|------|------|-----|---------------------------------------------------------------|----------------------------|-------------|
| CA2268 | IFU1.3F      | 1.0  | -1.0 | -1.0 | 1.0 | Unknown function, 3-prime end                                 |                            |             |
| CA2802 | IPF11363     | 1.0  | 1.0  | -1.0 | 1.0 | unknown function                                              |                            | orf19.9283  |
| CA4911 | IPF1435      | -1.1 | -1.0 | 1.0  | 1.0 | unknown function                                              | YBR156c                    | orf19.6049  |
| CA0218 | IPF15294     | -1.0 | -1.0 | -1.0 | 1.0 | unknown function                                              |                            | orf19.6238  |
| CA5785 | TPT1         | 1.0  | 1.0  | 1.1  | 1.0 | tRNA 2 -phosphotransferase (by homology)                      | YOL102c                    | orf19.5432  |
| CA4777 | PAN3         | 2.6  | 1.0  | 1.1  | 1.0 | component of the Pab1p-dependent poly(A)                      | ribot YKL025c              | orf19.4010  |
| CA4053 | IKS1         | -1.0 | -1.0 | 1.1  | 1.0 | PROBABLE SERINE/THREONINE-PROTEIN KINASE                      | YJL057c                    | orf19.428   |
| CA2942 | IPF6291      | -1.0 | 1.0  | 1.1  | 1.0 | Secretory Stress Response protein (by homology)               |                            | orf19.1969  |
| CA3856 | IPF4641      | 1.1  | 1.1  | 1.1  | 1.0 | similar to <i>Saccharomyces cerevisiae</i> Crd1p cardiolipin  | YDL142c                    | orf19.6100  |
| CA4912 | CNS1         | 1.0  | -1.0 | -1.1 | 1.0 | Cyclophilin Seven Suppressor (by homology)                    | YBR155w                    | orf19.6052  |
| CA0062 | IPF19315.5F  | -1.0 | 1.0  | 1.0  | 1.0 | unknown function, 5-prime end                                 | Missing in array           |             |
| CA1581 | CWH41.3EOC   | -1.1 | -1.1 | 1.0  | 1.0 | ER glucosidase I, 3-prime end (by homology)                   | YGL027c                    | orf19.4719  |
| CA1495 | IPF9686      | -1.1 | 1.0  | -1.0 | 1.0 | similar to <i>Saccharomyces cerevisiae</i> Sec8p Golgi - plas | YPR055w                    | orf19.3647  |
| CA3769 | IPF13465     | 1.1  | -1.1 | -1.0 | 1.0 | Putative anion transport protein (by homology)                | YNL275w                    | orf19.2898  |
| CA3276 | IPF6263      | 1.0  | 1.0  | -1.0 | 1.0 | unknown function                                              |                            | orf19.6310  |
| CA1526 | IPF13815     | 1.1  | -1.1 | 1.2  | 1.0 | unknown function                                              |                            | orf19.4553  |
| CA4918 | GLO1         | 1.0  | -1.0 | 1.0  | 1.0 | Glyoxalase I (by homology)                                    | YML004c                    | orf19.6058  |
| CA5599 | IPF560       | 1.0  | 1.1  | 1.1  | 1.0 | unknown function                                              |                            | orf19.7102  |
| CA2118 | IPF8024      | 1.0  | -1.0 | -1.0 | 1.0 | unknown function                                              |                            | orf19.1334  |
| CA1847 | IPF11127     | 1.0  | 1.0  | 1.1  | 1.0 | unknown function                                              |                            | orf19.639   |
| CA1633 | IPF10180     | 1.0  | 1.1  | 1.1  | 1.0 | unknown function                                              |                            | orf19.11422 |
| CA2995 | IPF9113      | 1.0  | 1.1  | 1.1  | 1.0 | unknown function                                              | YER130c                    | orf19.6121  |
| CA1568 | IPF7615      | 1.1  | -1.1 | -1.1 | 1.0 | unknown function                                              |                            | orf19.1158  |
| CA0995 | IPF10074     | 1.0  | 1.0  | 1.0  | 1.0 | unknown function                                              |                            | orf19.9822  |
| CA0682 | IPF14514     | 1.0  | 1.0  | -1.0 | 1.0 | unknown function                                              | YMR312w                    | orf19.12171 |
| CA1646 | IPF9336.3EOC | 1.0  | 1.1  | 1.1  | 1.0 | unknown function, 3-prime end                                 |                            | orf19.1725  |
| CA0381 | IPF16047     | 1.0  | 1.0  | 1.1  | 1.0 | unknown function                                              | YKR071c                    | orf19.2825  |
| CA0266 | IPF17773     | -1.0 | 1.1  | -1.0 | 1.0 | unknown function                                              |                            |             |
| CA1926 | IPF13407     | -1.0 | 1.1  | 1.0  | 1.0 | Unknown function                                              |                            | orf19.8373  |
| CA1535 | IPF9515      | 1.2  | 1.0  | 1.2  | 1.0 | similar to <i>Saccharomyces cerevisiae</i> Scs2p required for | YER120w                    | orf19.8800  |
| CA1056 | IPF17503     | 1.1  | 1.1  | 1.1  | 1.0 | protein folding and stabilization (by homology)               |                            | orf19.2542  |
| CA3115 | ECM33.3      | 1.0  | 1.1  | 1.1  | 1.0 | cell wall biogenesis, 3-prime end (by homology)               | YBR078w                    |             |
| CA2182 | IPF6871      | -1.0 | -1.0 | -1.1 | 1.0 | unknown function                                              |                            | orf19.4253  |
| CA1715 | RPS21        | 1.0  | 1.0  | -1.1 | 1.0 | ribosomal protein (by homology)                               | YGL123w                    | orf19.3334  |
| CA5619 | IPF514       | 1.0  | -1.0 | -1.0 | 1.0 | similar to <i>Saccharomyces cerevisiae</i> Bud3p budding pr   | YCL014w ; Missing in array | orf19.7079  |
| CA1841 | CCA1         | -1.0 | 1.0  | 1.1  | 1.0 | tRNA nucleotidyltransferase (by homology)                     | YER168c                    | orf19.4705  |
| CA1656 | IPF16019     | 1.1  | 1.0  | -1.0 | 1.0 | unknown function                                              | YOR308c                    | orf19.4326  |
| CA0764 | PRE2         | -1.0 | -1.0 | -1.1 | 1.0 | 20S proteasome subunit (beta5)                                | YPR103w                    | orf19.2233  |
| CA3164 | IPF13187     | 1.0  | -1.0 | -1.0 | 1.0 | unknown function                                              |                            | orf19.1580  |
| CA2504 | IPF6803.3F   | 1.0  | -1.0 | 1.1  | 1.0 | unknown function, 3-prime end                                 |                            | orf19.5593  |
| CA3979 | ENT3.3F      | -1.1 | 1.1  | 1.1  | 1.0 | putative endocytosis and cytoskeleton protein, 3-prime        | YJR125c                    | orf19.1553  |
| CA5133 | IPF5129      | 1.1  | 1.0  | 1.1  | 1.0 | unknown function                                              |                            | orf19.6392  |
| CA3726 | IPF6175      | -1.1 | -1.1 | 1.1  | 1.0 | unknown function                                              | YMR188c                    | orf19.4176  |
| CA5089 | MRPL27       | 1.1  | 1.0  | 1.0  | 1.0 | ribosomal protein (by homology)                               | YBR282w                    | orf19.3064  |
| CA0281 | IPF10564.3   | 1.0  | 1.0  | 1.1  | 1.0 | unknown function, 3-prime end                                 |                            | orf19.1438  |
| CA3932 | IPF20150     | 1.0  | -1.0 | 1.0  | 1.0 | unknown function                                              |                            | orf19.9561  |
| CA0992 | IPF11063     | 1.1  | -1.0 | 1.0  | 1.0 | unknown function                                              | YCR090c                    | orf19.8972  |
| CA1733 | IPF3931      | 1.0  | 1.1  | 1.1  | 1.0 | Unknown function                                              |                            | orf19.13854 |
| CA5681 | MNN9         | 1.0  | 1.0  | 1.0  | 1.0 | Required for complex N-glycosylation                          | YPL050c                    | orf19.7383  |

|              |              |      |      |      |     |                                                                                                     |          |             |
|--------------|--------------|------|------|------|-----|-----------------------------------------------------------------------------------------------------|----------|-------------|
| CA5622       | GBP2.3       | 1.1  | 1.0  | 1.3  | 1.0 | single-strand telomeric DNA-binding protein, 3-prime en                                             | YCL011c  | orf19.7076  |
| CA0769       | IPF10967     | 1.1  | 1.0  | 1.0  | 1.0 | unknown function                                                                                    |          | orf19.2826  |
| CA2787       | EFG1         | 1.1  | 1.1  | 1.1  | 1.0 | Enhanced filamentous growth factor                                                                  | YMR016c  | orf19.8243  |
| CA2496       | IPF3468      | 1.0  | 1.1  | 1.1  | 1.0 | unknown function                                                                                    |          | orf19.4055  |
| CA3053       | GTR2         | -1.0 | 1.0  | 1.1  | 1.0 | GTP-binding protein (by homology)                                                                   | YGR163w  | orf19.9944  |
| CA5002       | IPF2021      | 1.0  | -1.0 | 1.0  | 1.0 | unknown function                                                                                    |          | orf19.5245  |
| CA0455       | TCA5A        | -1.0 | 1.0  | -1.0 | 1.0 | polyprotein of Tca5 retrotransposon                                                                 |          | orf19.2427  |
| CA2730       | IPF10325     | 1.0  | -1.0 | -1.1 | 1.0 | molybdopterin-converting factor by homology                                                         | YKL027w  | orf19.9663  |
| Human c Myc1 |              | 1.0  | 1.1  | 1.0  | 1.0 |                                                                                                     |          |             |
| CA1314       | MAG1         | -1.0 | 1.0  | 1.1  | 1.0 | 3-methyladenine DNA glycosylase (by homology)                                                       | YER142c  | orf19.3639  |
| CA4101       | IPF3984      | 1.1  | -1.0 | 1.0  | 1.0 | unknown function                                                                                    |          | orf19.667   |
| CA0483       | SEC9         | 1.0  | 1.1  | 1.1  | 1.0 | transport protein (by homology)                                                                     | YGR009c  | orf19.7764  |
| CA0514       | BEM1         | 1.0  | 1.1  | 1.1  | 1.0 | bud emergence mediator (by homology)                                                                | YBR200w  | orf19.4645  |
| CA1363       | IPF5556      | -1.0 | 1.1  | -1.0 | 1.0 | acid phosphatase (by homology)                                                                      |          | orf19.4424  |
| CA2374       | FCY23        | 1.1  | -1.0 | 1.1  | 1.0 | Putative purine-cytosine transport protein                                                          | YGL186c  | orf19.9390  |
| CA5948       | IPF3496      | -1.1 | -1.1 | -1.0 | 1.0 | unknown function                                                                                    |          | orf19.6748  |
| CA3440       | IPF11328     | -1.1 | 1.0  | -1.0 | 1.0 | unknown function                                                                                    |          | orf19.2985  |
| CA5265       | IPF1792      | -1.1 | -1.0 | 1.0  | 1.0 | unknown function                                                                                    |          | orf19.4997  |
| CA3324       | IPF6893      | 1.0  | 1.0  | -1.0 | 1.0 | unknown function                                                                                    | YMR288w  | orf19.2675  |
| CA5777       | IPF1118      | -1.0 | 1.0  | -1.0 | 1.0 | unknown function                                                                                    |          | orf19.5422  |
| CA1457       | IPF8287      | 1.1  | -1.0 | -1.0 | 1.0 | unknown function                                                                                    | YML050w  | orf19.612   |
| CA1393       | IFO3         | -1.1 | -1.0 | -1.1 | 1.0 | Similar to Streptomyces coelicolor putative hydrolase                                               |          | orf19.1766  |
| CA6133       | DUR35.3F     | -1.0 | -1.0 | -1.1 | 1.0 | Urea transport protein, 3-prime end (by homology)                                                   |          | orf19.5915  |
| CA0296       | IFA11        | 1.0  | 1.1  | 1.0  | 1.0 | Unknown function                                                                                    |          | orf19.1596  |
| CA4367       | MNN10        | 1.1  | -1.0 | 1.1  | 1.0 | galactosyltransferase (by homology)                                                                 | YDR245w  | orf19.5658  |
| CA1083       | IPF1034      | 1.0  | -1.0 | 1.0  | 1.0 | Similarity to transcription factors                                                                 |          | orf19.12042 |
| CA0105       | IPF17529.3   | -1.1 | -1.0 | 1.0  | 1.0 | unknown function, 3-prime end                                                                       |          | orf19.786   |
| CA4287       | IPF20011.3F  | -1.0 | 1.1  | 1.1  | 1.0 | similar to Saccharomyces cerevisiae Pnc1p pyrazinamidase and nicotinamidase, 3-prime end (by homolo |          | orf19.5390  |
| CA5754       | IPF1060      | 1.1  | 1.2  | 1.1  | 1.0 | unknown function, Asn rich                                                                          |          | orf19.5390  |
| CA4701       | IPF4214      | 1.0  | 1.0  | 1.1  | 1.0 | unknown function                                                                                    | YER134c  | orf19.6929  |
| CA1419       | IPF17296     | -1.0 | 1.1  | 1.0  | 1.0 | unknown function                                                                                    |          | orf19.175   |
| CA5486       | IPF813       | -1.1 | 1.0  | 1.0  | 1.0 | unknown function                                                                                    |          | orf19.5320  |
| CA6001       | IPF662       | 1.0  | 1.0  | -1.1 | 1.0 | unknown function                                                                                    | YGL136c  | orf19.7601  |
| CA5107       | IPF1358      | 1.0  | -1.0 | 1.0  | 1.0 | unknown function                                                                                    |          | orf19.6431  |
| CA2271       | MRS2         | -1.0 | 1.0  | -1.0 | 1.0 | Mitochondrial RNA splicing protein (by homology)                                                    | YOR334w  | orf19.2597  |
| CA0141       | PF17520.53EO | -1.0 | 1.0  | 1.1  | 1.0 | unknown function, internal fragment                                                                 |          | orf19.1021  |
| CA0901       | IPF12033     | -1.0 | 1.1  | 1.0  | 1.0 | unknown function                                                                                    | YCR068w  | orf19.3412  |
| CA4957       | IPF4588      | -1.0 | 1.1  | -1.0 | 1.0 | putative aldehyde dehydrogenase (by homology)                                                       |          | orf19.6518  |
| CA1257       | IPF18725     | -1.1 | 1.1  | 1.1  | 1.0 | unknown function                                                                                    | YOR262w  | orf19.10678 |
| CA4526       | MON1.3       | -1.0 | 1.0  | 1.0  | 1.0 | unknown function, 3-prime end                                                                       | YGL124c  | orf19.8109  |
| CA4837       | IPF1228      | 1.0  | 1.0  | -1.0 | 1.0 | unknown function                                                                                    |          | orf19.2059  |
| CA1724       | MRP10        | 1.0  | 1.0  | 1.0  | 1.0 | Mitochondrial ribosomal protein (by homology)                                                       | YDL045wa |             |
| CA5851       | KIN2         | 1.0  | 1.1  | 1.0  | 1.0 | ser/thr protein kinase (by homology)                                                                | YLR096w  | orf19.7510  |
| CA1336       | PF5334.EXON  | 1.1  | 1.0  | -1.0 | 1.0 | unknown function, exon 2                                                                            | YHR100c  |             |
| CA0946       | IPF10277     | 1.0  | 1.1  | 1.1  | 1.0 | unknown function                                                                                    | YER048wa |             |
| CA4188       | IPF7525      | 1.0  | 1.1  | 1.1  | 1.0 | unknown function                                                                                    |          | orf19.4529  |
| CA5289       | NRG1         | -1.0 | 1.1  | -1.0 | 1.0 | similar to transcriptional repressor Nrg1p/Nrg2p                                                    | YBR066c  | orf19.7150  |
| CA4704       | RRD2         | -1.0 | 1.0  | 1.1  | 1.0 | hosphotyrosyl phosphatase activator                                                                 | YPL152w  | orf19.6933  |
| CA1203       | IPF3937      | -1.1 | 1.2  | 1.2  | 1.0 | Unknown function                                                                                    |          | orf19.8487  |

|        |             |      |      |      |     |                                                             |         |             |
|--------|-------------|------|------|------|-----|-------------------------------------------------------------|---------|-------------|
| CA2797 | IPF8404     | 1.0  | 1.0  | -1.0 | 1.0 | putative helicase (by homology)                             | YFR038w | orf19.1720  |
| CA5030 | IPF2988     | 1.0  | 1.0  | 1.2  | 1.0 | unknown function                                            |         | orf19.6984  |
| CA2830 | RBT1        | 1.1  | -1.0 | 1.1  | 1.0 | repressed by TUP1 protein 1                                 |         | orf19.1327  |
| CA0821 | IPF16795    | -1.0 | 1.0  | 1.1  | 1.0 | glycerate/formate-dehydrogenase (by homology)               | YNL274c | orf19.2989  |
| CA2725 | MRPL23A     | 1.0  | -1.0 | 1.0  | 1.0 | mitochondrial ribosomal protein L23 (by homology)           | YOR150w | orf19.10856 |
| CA2440 | IPF7513     | -1.0 | -1.0 | -1.0 | 1.0 | unknown function                                            | YGL110c | orf19.2196  |
| CA4544 | IPF6252     | -1.0 | -1.0 | 1.1  | 1.0 | similar to <i>Saccharomyces cerevisiae</i> Tad2p tRNA-speci | YJL035c | orf19.1458  |
| CA0610 | CDR11.5F    | 1.1  | 1.2  | -1.1 | 1.0 | multidrug resistance protein, 5-prime end (by homology)     |         | orf19.8533  |
| CA3459 | CGT1.3F     | 1.0  | -1.1 | -1.0 | 1.0 | mRNA capping enzyme alpha subunit, 3-prime end              | YGL130w | orf19.1261  |
| CA1196 | IPF10394    | -1.0 | 1.1  | 1.1  | 1.0 | unknown function                                            |         |             |
| CA3983 | IPF7133.3   | -1.0 | 1.1  | 1.1  | 1.0 | unknown function, 3-prime end                               | YLR137w | orf19.9130  |
| CA0720 | IPF17932    | 1.1  | -1.2 | -1.0 | 1.0 | unknown function                                            | YBR175w | orf19.3457  |
| CA5010 | IPF13945    | 1.0  | -1.0 | -1.1 | 1.0 | Unknown function                                            |         |             |
| CA1919 | IPF7477     | 1.0  | 1.0  | 1.0  | 1.0 | unknown function                                            |         | orf19.2442  |
| CA4454 | IPF15160    | -1.0 | -1.0 | 1.0  | 1.0 | unknown function                                            | YEL072w | orf19.6852  |
| CA0396 | SNM1        | 1.1  | 1.0  | 1.0  | 1.0 | RNA binding protein of RNase MRP (by homology)              |         | orf19.1927  |
| CA2177 | ROD1        | 1.1  | 1.1  | 1.1  | 1.0 | O-dinitrobenzene,calcium and zinc resistance protein (b     | YFR022w | orf19.9084  |
| CA0301 | IPF19688    | 1.0  | 1.0  | 1.0  | 1.0 | unknown function                                            |         | orf19.1606  |
| CA4676 | HK1         | -1.0 | 1.1  | 1.2  | 1.0 | Histidine kinase                                            |         | orf19.896   |
| CA0273 | IPF19066    | -1.1 | -1.2 | -1.2 | 1.0 | unknown function                                            |         | orf19.1433  |
| CA0053 | IFA16       | -1.0 | 1.0  | -1.0 | 1.0 | unknown function                                            |         | orf19.380   |
| CA3144 | ASF1        | 1.1  | 1.1  | 1.0  | 1.0 | anti-silencing protein (by homology)                        | YJL115w | orf19.3715  |
| CA6160 | IPF1835     | 1.0  | 1.1  | 1.1  | 1.0 | unknown function                                            |         | orf19.5876  |
| CA1258 | RPN8        | -1.2 | -1.0 | -1.1 | 1.0 | 26S proteasome regulatory subunit (by homology)             | YOR261c | orf19.10677 |
| CA1576 | HYR1        | 1.1  | 1.0  | -1.0 | 1.0 | hyphally regulated protein                                  |         | orf19.12440 |
| CA5743 | IPF2895     | -1.0 | -1.0 | -1.0 | 1.0 | unknown function                                            | YGL113w | orf19.7452  |
| CA3491 | RPC40       | 1.1  | 1.0  | 1.0  | 1.0 | RNA polymerase (by homology)                                | YPR110c | orf19.3564  |
| CA1116 | CCT5        | -1.3 | -1.0 | -1.1 | 1.0 | T-complex protein 1, epsilon subunit (by homology)          | YJR064w | orf19.2288  |
| CA0935 | IPF14203.5F | 1.0  | 1.0  | -1.0 | 1.0 | similarity to several transaminases, 5-prime end (by hor    | YFL030w | orf19.1079  |
| CA4336 | DDR48       | -1.1 | 1.0  | -1.2 | 1.0 | stress protein (by homology)                                |         | orf19.4082  |
| CA2158 | ECM1        | -1.0 | -1.0 | -1.1 | 1.0 | involved in cell wall biosynthesis (by homology)            | YAL059w | orf19.5299  |
| CA4634 | IPF1526     | -1.0 | 1.0  | -1.0 | 1.0 | unknown function                                            | YLR119w | orf19.340   |
| CA6055 | SMD1        | 1.0  | -1.0 | 1.0  | 1.0 | snRNA-associated protein (by homology)                      |         | orf19.7673  |
| CA4539 | IFQ4        | -1.0 | -1.0 | 1.1  | 1.0 | Unknown function                                            |         | orf19.1464  |
| CA4622 | IPF5751     | -1.2 | 1.1  | 1.0  | 1.0 | TRAPP subunit of 20 kDa involved in targeting and fusio     | YBR254c | orf19.3314  |
| CA0321 | APL2        | -1.2 | -1.1 | 1.0  | 1.0 | AP-1 complex subunit, beta1-adaptin (by homology)           | YKL135c | orf19.7861  |
| CA5593 | IPF5615     | 1.0  | 1.0  | 1.0  | 1.0 | unknown function                                            | YJL122w | orf19.7107  |
| CA0282 | IPF17417    | 1.0  | 1.0  | -1.0 | 1.0 | Unknown function                                            |         | orf19.12160 |
| CA2418 | MNT4        | -1.0 | 1.0  | -1.0 | 1.0 | putative mannosyltransferase                                | YBR199w | orf19.4475  |
| CA5464 | IPF285.5F   | 1.0  | 1.0  | 1.0  | 1.0 | unknown function, 5-prime end                               | YCR059c | orf19.3273  |
| CA1670 | IPF11392    | 1.1  | 1.2  | 1.1  | 1.0 | unknown function                                            |         | orf19.2851  |
| CA2750 | ATX1        | 1.1  | 1.0  | 1.1  | 1.0 | antioxidant protein and metal homeostasis factor (by ho     | YNL259c |             |
| CA4445 | IPF3530     | -1.0 | 1.1  | -1.1 | 1.0 | unknown function                                            |         | orf19.6843  |
| CA0133 | IPF3746     | 1.0  | 1.0  | 1.0  | 1.0 | unknown function                                            | YDR017c | orf19.1007  |
| CA1474 | IPF10208    | 1.0  | -1.0 | -1.0 | 1.0 | chloride channel-like protein (by homology)                 |         | orf19.1096  |
| CA2882 | STE13       | -1.0 | -1.1 | -1.1 | 1.0 | type IV dipeptidyl aminopeptidase (by homology)             | YOR219c | orf19.5851  |
| CA4126 | IPF6631     | -1.0 | -1.0 | 1.0  | 1.0 | unknown function                                            |         | orf19.2763  |
| CA0233 | URE2        | 1.0  | 1.0  | 1.0  | 1.0 | Nitrogen catabolite repression regulator (by homology)      | YNL229c | orf19.7794  |
| CA5052 | IPF3708     | 1.1  | 1.0  | 1.1  | 1.0 | unknown function                                            |         | orf19.3016  |

|        |              |      |      |      |     |                                                          |                            |             |
|--------|--------------|------|------|------|-----|----------------------------------------------------------|----------------------------|-------------|
| CA5748 | IPF2905      | 1.0  | 1.1  | -1.0 | 1.0 | unknown function                                         |                            | orf19.7457  |
| CA2445 | IPF13885     | 1.1  | 1.0  | 1.1  | 1.0 | unknown function                                         |                            | orf19.5503  |
| CA3532 | IPF13448     | 1.0  | -1.0 | 1.0  | 1.0 | similar to Saccharomyces Ptp1p protein tyrosine phospho  | YDL230w                    | orf19.6365  |
| CA0039 | IPF3998      | 1.0  | 1.1  | 1.0  | 1.0 | unknown function                                         |                            | orf19.8278  |
| CA1469 | IPF5078      | -1.1 | 1.0  | 1.1  | 1.0 | unknown function                                         | YLR417w                    | orf19.8414  |
| CA5395 | IPF9401      | -1.0 | -1.0 | 1.1  | 1.0 | unknown function                                         |                            | orf19.938   |
| CA0342 | IPF10470     | -1.1 | -1.0 | 1.0  | 1.0 | unknown function                                         | YJR003c                    | orf19.1789  |
| CA4189 | IPF7527      | -1.0 | -1.0 | -1.0 | 1.0 | unknown function                                         |                            |             |
| CA5898 | IPF2383      | 1.0  | -1.1 | 1.0  | 1.0 | unknown function                                         |                            | orf19.6808  |
| CA4332 | GLO2         | -1.1 | 1.0  | 1.1  | 1.0 | Glyoxalase II (hydroxyacylglutathione hydrolase) (by ho  | YDR272w                    | orf19.4088  |
| CA1543 | IPF1043      | 1.0  | 1.0  | -1.0 | 1.0 | Similar to hydroxyquinol 1,2-dioxygenase                 |                            | orf19.4567  |
| CA2536 | IPF20107     | 1.1  | -1.0 | 1.0  | 1.0 | unknown function                                         | YOL111c                    | orf19.3183  |
| CA2347 | RAD51        | 1.1  | 1.2  | 1.3  | 1.0 | DNA repair protein by homology                           | YER095w                    | orf19.3752  |
| CA0825 | PLB2         | 1.1  | 1.0  | 1.0  | 1.0 | phospholipase B                                          |                            | orf19.8309  |
| CA2681 | SEC4         | -1.0 | 1.0  | 1.3  | 1.0 | GTP-binding protein                                      | YFL005w                    | orf19.2571  |
| CA3628 | IPF18316.3F  | -1.1 | 1.0  | 1.0  | 1.0 | unknown function, 3-prime end                            |                            | orf19.12611 |
| CA0889 | IPF11767     | 1.1  | 1.0  | 1.2  | 1.0 | mitochondrial carrier protein (by homology)              |                            | orf19.4733  |
| CA1751 | ARO3.EXON2   | -1.1 | 1.1  | -1.0 | 1.0 | 3-deoxy-D-arabinoheptulosonate-7-phosphate synthase      | YDR035w                    | orf19.1517  |
| CA2072 | IPF6970      | 1.0  | 1.0  | 1.0  | 1.0 | unknown function                                         | YKR085c                    | orf19.2639  |
| CA3589 | IPF10113     | 1.1  | 1.0  | -1.1 | 1.0 | unknown function                                         | YNR020c                    | orf19.2249  |
| CA2698 | SUL1         | -1.1 | 1.0  | 1.1  | 1.0 | High-affinity sulfate transport protein (by homology)    | YLR092w                    | orf19.10252 |
| CA1546 | IPF6671      | -1.0 | 1.0  | -1.0 | 1.0 | unknown function                                         | YLL005c                    | orf19.8891  |
| CA0473 | GRP1         | -1.0 | -1.0 | -1.0 | 1.0 | dihydroflavonol-4-reductases (by homology)               |                            | orf19.12245 |
| CA1407 | UAPC         | 1.0  | 1.0  | 1.0  | 1.0 | purine permease (by homology)                            |                            | orf19.2882  |
| CA3344 | IPF13359     | -1.0 | -1.0 | -1.1 | 1.0 | unknown function                                         | YDR363w                    | orf19.2326  |
| CA2071 | IPF6971.53   | 1.0  | 1.0  | 1.1  | 1.0 | unknown function, internal fragment                      | YNL147w                    |             |
| CA0373 | IPF7655.5EOC | 1.0  | 1.1  | 1.0  | 1.0 | unknown function, 5-prime end                            |                            |             |
| CA3492 | IPF3189      | 1.0  | 1.1  | 1.1  | 1.0 | unknown function                                         |                            | orf19.3563  |
| CA5344 | PRY2         | 1.1  | 1.0  | 1.2  | 1.0 | putative pathogen related proteins (by homology)         | YJL079c                    | orf19.7218  |
| CA5300 | IPF2189      | 1.0  | 1.0  | 1.0  | 1.0 | unknown function                                         |                            | orf19.7165  |
| CA4377 | IPF11301     | 1.0  | -1.0 | 1.0  | 1.0 | unknown function                                         |                            | orf19.5669  |
| CA4009 | IPF4247      | 1.1  | -1.0 | 1.0  | 1.0 | unknown function                                         |                            | orf19.1625  |
| CA3312 | IPF8810      | 1.0  | 1.1  | -1.0 | 1.0 | unknown function                                         | YEL003w                    | orf19.2305  |
| CA4607 | IPF6223      | 1.1  | -1.0 | 1.1  | 1.0 | unknown function                                         | YGR215w                    | orf19.3297  |
| CA1965 | IPF14035     | -1.1 | 1.0  | -1.0 | 1.0 | Similar to serine/threonine protein kinase (by homology) | YJL106w                    | orf19.2395  |
| CA2015 | IPF3416      | 1.0  | -1.0 | 1.0  | 1.0 | unknown function                                         |                            | orf19.8468  |
| CA0335 | IFA2         | 1.1  | 1.0  | 1.0  | 1.0 | unknown function                                         |                            | orf19.7825  |
| CA5375 | IPF5239      | 1.1  | 1.1  | 1.1  | 1.0 | similarity to aldose reductase (by homology)             |                            | orf19.7260  |
| CA3967 | IPF9377      | 1.0  | -1.0 | -1.0 | 1.0 | unknown function                                         |                            | orf19.1428  |
| CA5596 | IPF564       | -1.1 | 1.1  | -1.1 | 1.0 | unknown function                                         |                            | orf19.7104  |
| CA6048 | IPF4934      | 1.0  | 1.1  | -1.0 | 1.0 | unknown function                                         | YCR087ca                   | orf19.7664  |
| CA5520 | IPF714       | -1.0 | -1.1 | -1.1 | 1.0 | unknown function                                         | YDR049w                    | orf19.5368  |
| CA4995 | YAK1         | 1.0  | -1.0 | -1.0 | 1.0 | Ser/thr protein kinase (by homology)                     |                            | orf19.5253  |
| CA0519 | MRPL10.3     | 1.0  | -1.0 | 1.0  | 1.0 | ribosomal protein, 3-prime end (by homology)             | YNL284c                    | orf19.11016 |
| CA1611 | SPO72        | 1.0  | 1.1  | -1.0 | 1.0 | required for sporulation (by homology)                   | YNL242w ; Missing in array | orf19.4119  |
| CA5567 | FCY24        | -1.0 | 1.0  | 1.1  | 1.0 | Putative purine-cytosine transport protein               |                            | orf19.7331  |
| CA4813 | DPB4         | -1.0 | 1.1  | -1.1 | 1.0 | DNA-directed DNA polymerase epsilon, subunit D (by h     | YDR121w                    | orf19.2088  |
| CA3140 | IPF9214      | 1.0  | 1.0  | 1.0  | 1.0 | unknown function                                         |                            | orf19.3711  |
| CA1636 | IPF20086     | 1.0  | 1.1  | 1.1  | 1.0 | unknown function                                         | YJR102c                    | orf19.3942  |

|        |            |      |      |      |     |                                                                        |                  |             |
|--------|------------|------|------|------|-----|------------------------------------------------------------------------|------------------|-------------|
| CA0980 | IPF17655   | 1.0  | -1.1 | 1.0  | 1.0 | unknown function                                                       |                  | orf19.3600  |
| CA6071 | IPF4835    | -1.0 | -1.1 | -1.0 | 1.0 | zinc finger protein (by homology)                                      |                  | orf19.5992  |
| CA5311 | IPF2166    | 1.1  | 1.0  | 1.1  | 1.0 | unknown function                                                       | YGL232w          | orf19.7182  |
| CA6022 | IPF618     | 1.1  | 1.0  | 1.1  | 1.0 | GPI-anchored cell surface protein (by homology)                        |                  | orf19.7625  |
| CA1229 | MLH1       | -1.0 | 1.0  | -1.0 | 1.0 | DNA mismatch repair protein (by homology)                              | YMR167w          | orf19.4162  |
| CA4945 | FLX1       | 1.1  | 1.1  | 1.1  | 1.0 | MITOCHONDRIAL FAD CARRIER by homology                                  | YIL134w          | orf19.6532  |
| CA6015 | ARD1       | 1.1  | -1.0 | -1.0 | 1.0 | protein N-acetyltransferase subunit (by homology)                      | YHR013c          | orf19.7617  |
| CA2466 | IPF8725    | 1.1  | 1.0  | 1.0  | 1.0 | unknown function                                                       |                  |             |
| CA2148 | AUT1       | -1.0 | 1.0  | 1.0  | 1.0 | similar to <i>Saccharomyces cerevisiae</i> Aut1p essential for         |                  | orf19.6020  |
| CA1241 | LIP8       | 1.1  | 1.1  | 1.0  | 1.0 | Secretory lipase                                                       |                  | orf19.8925  |
| CA5252 | DIM1       | 1.0  | -1.1 | -1.0 | 1.0 | rRNA (adenine-N6,N6)-dimethyltransferase (by homolc                    | YPL266w          | orf19.5010  |
| CA2420 | SPC19      | 1.0  | 1.0  | -1.0 | 1.0 | spindle pole body protein (by homology)                                | YDR201w          | orf19.4473  |
| CA0467 | TRX2       | 1.1  | 1.0  | 1.0  | 1.0 | thioredoxin (by homology)                                              |                  | orf19.1976  |
| CA4887 | IPF1632    | -1.0 | 1.0  | 1.0  | 1.0 | unknown function                                                       |                  | orf19.6579  |
| CA0902 | IPF12034   | 1.1  | 1.0  | 1.0  | 1.0 | unknown function                                                       |                  | orf19.3413  |
| CA3058 | IPF2955    | 1.1  | -1.0 | -1.1 | 1.0 | unknown function                                                       |                  | orf19.4292  |
| CA5250 | IPF1826    | 1.0  | 1.0  | 1.0  | 1.0 | unknown function                                                       |                  | orf19.5012  |
| CA1843 | IPF11364   | 1.0  | 1.0  | -1.0 | 1.0 | unknown function                                                       |                  | orf19.635   |
| CA4744 | IPF4489    | 1.0  | 1.0  | 1.1  | 1.0 | unknown function                                                       | YGR113w          | orf19.4837  |
| CA0499 | IFA9       | 1.0  | 1.1  | 1.1  | 1.0 | unknown function                                                       |                  | orf19.2663  |
| CA1383 | IPF8422    | -1.1 | -1.0 | 1.0  | 1.0 | unknown function                                                       | YML036w          | orf19.927   |
| CA0962 | IPF9145    | -1.2 | 1.0  | 1.1  | 1.0 | unknown function                                                       |                  | orf19.6245  |
| CA2160 | IPF15664   | 1.1  | -1.0 | 1.0  | 1.0 | unknown function                                                       | YIL157c          | orf19.5296  |
| CA5869 | MIS12      | 1.0  | -1.1 | -1.0 | 1.0 | mitochondrial C1-tetrahydrofolate synthase precursor (by homology)     |                  | orf19.7534  |
| CA4207 | YAT1       | -1.1 | -1.1 | -1.0 | 1.0 | carnitine acetyltransferase (by homology)                              | YAR035w          | orf19.4551  |
| CA5768 | PAC1       | 1.0  | 1.1  | 1.0  | 1.0 | Similarity to human LIS-1 protein (by homomology)                      | YOR269w          | orf19.5410  |
| CA0194 | IPF16228   | 1.1  | -1.0 | 1.1  | 1.0 | unknown function                                                       | YGL224c          | orf19.11404 |
| CA4835 | IPF1218    | 1.1  | 1.1  | 1.0  | 1.0 | Similar to superoxide dismutase (by homology)                          |                  | orf19.2062  |
| CA6101 | SPO70.3F   | 1.0  | 1.1  | 1.1  | 1.0 | involved in meiosis and sporulation, 3-prime end                       |                  |             |
| CA3719 | IPF6190    | -1.0 | 1.1  | -1.0 | 1.0 | unknown function                                                       |                  | orf19.11645 |
| CA1492 | IPF168     | 1.1  | -1.0 | 1.1  | 1.0 | unknown function                                                       | YDL046w          | orf19.3226  |
| CA4160 | IPF9294    | 1.0  | 1.1  | 1.0  | 1.0 | unknown function                                                       | YBR271w          | orf19.5808  |
| CA5070 | IPF3594    | 1.1  | -1.0 | 1.0  | 1.0 | triglyceride lipase (by homology)                                      | YDR058c          | orf19.3043  |
| CA2282 | IPF14438   | -1.0 | 1.0  | 1.1  | 1.0 | unknown function                                                       |                  | orf19.12995 |
| CA3202 | IPF3444.5F | -1.0 | 1.0  | -1.0 | 1.0 | unknown function, 5-prime end                                          |                  | orf19.6184  |
| CA0927 | IPF11332   | -1.2 | -1.0 | -1.2 | 1.0 | unknown function                                                       | YPL072w          | orf19.3661  |
| CA4357 | IPF19800   | -1.0 | 1.0  | 1.0  | 1.0 | unknown function                                                       | YCR015c          | orf19.6732  |
| CA3962 | IPF11234   | 1.0  | 1.0  | 1.0  | 1.0 | similar to <i>saccharomyces cerevisiae</i> Dal3p ureidoglycol: YIR032c |                  | orf19.1421  |
| CA1823 | IPF9522.5F | 1.0  | -1.0 | 1.1  | 1.0 | septin, 5-prime end (by homology)                                      |                  | orf19.4267  |
| CA2585 | IPF9438    | -1.0 | -1.0 | -1.0 | 1.0 | similar to <i>Saccharomyces cerevisiae</i> Prp42p U1 snRNP             | YDR235w          | orf19.4374  |
| CA1930 | IPF3906.3  | -1.0 | 1.0  | 1.0  | 1.0 | unknown function, 3-prime end                                          | YPR079w          | orf19.758   |
| CA2745 | HIR1       | -1.0 | 1.0  | 1.1  | 1.0 | Histone transcription regulator (by homology)                          | YBL008w          | orf19.9647  |
| CA4151 | SHE9       | 1.0  | -1.1 | -1.1 | 1.0 | causes lethality when overexpressed                                    | YDR393w          | orf19.5796  |
| CA2187 | IPF11667   | -1.0 | -1.0 | 1.0  | 1.0 | unknown function                                                       |                  | orf19.4771  |
| CA0516 | IPF11526   | -1.0 | 1.0  | 1.0  | 1.0 | unknown function                                                       | Missing in array | orf19.2804  |
| CA2814 | IPF5607    | 1.1  | -1.0 | -1.0 | 1.0 | unknown function                                                       | YLR435w          | orf19.2998  |
| CA5366 | IPF823     | 1.1  | -1.0 | 1.0  | 1.0 | tRNA (5-methylaminomethyl-2-thiouridylate)-methyltran:                 | YDL033c          | orf19.7245  |
| CA6073 | HRP1       | 1.1  | 1.0  | 1.1  | 1.0 | Nuclear polyadenylated RNA-binding protein (by homolc                  | YOL123w          | orf19.5989  |
| CA3760 | ERG26      | 1.0  | -1.0 | -1.1 | 1.0 | C-3 sterol dehydrogenase (C-4 decarboxylase) (by hom                   | YGL001c          | orf19.2909  |



|        |             |      |      |      |     |                                                                         |                  |             |
|--------|-------------|------|------|------|-----|-------------------------------------------------------------------------|------------------|-------------|
| CA3291 | IPF5730     | -1.0 | 1.1  | 1.1  | 1.0 | unknown function                                                        | YNL211c          |             |
| CA5146 | YMC2        | -1.0 | -1.0 | 1.1  | 1.0 | Carnitine/acylcarnitine translocase (by homology)                       |                  | orf19.4583  |
| CA5462 | GSL23.3F    | 1.0  | 1.0  | 1.1  | 1.0 | 1,3-beta-D-glucan synthase subunit, 3-prime end                         | Missing in array | orf19.3270  |
| CA3961 | IPF11235    | -1.0 | -1.1 | 1.0  | 1.0 | unknown function                                                        | YFR043c          | orf19.1420  |
| CA4763 | IPF9645     | -1.1 | -1.0 | -1.1 | 1.0 | similar to <i>Saccharomyces cerevisiae</i> Rim13p calpain-lik           | YMR154c          | orf19.3995  |
| CA0936 | IPF16291    | 1.1  | -1.0 | 1.1  | 1.0 | unknown function                                                        |                  | orf19.1080  |
| CA4767 | IPF13054    | 1.0  | 1.0  | 1.1  | 1.0 | unknown function                                                        |                  | orf19.3999  |
| CA6152 | NUP85       | -1.1 | 1.2  | -1.0 | 1.0 | Nuclear pore protein (by homology)                                      | YJR042w          | orf19.5887  |
| CA1531 | RVS167      | 1.0  | -1.0 | 1.0  | 1.0 | (putative) cytoskeletal protein (by homology)                           | YDR388w          | orf19.1220  |
| CA0363 | SPR3        | 1.1  | 1.1  | 1.0  | 1.0 | sporulation-specific septin (by homology)                               |                  | orf19.1524  |
| CA6080 | IPF21       | -1.0 | 1.0  | 1.1  | 1.0 | unknown function                                                        |                  | orf19.5980  |
| CA4464 | IPF9828     | -1.0 | 1.0  | 1.0  | 1.0 | similar to <i>Saccharomyces cerevisiae</i> Apc5p component              | YOR249c          | orf19.6861  |
| CA0013 | MAK32       | 1.1  | 1.1  | 1.1  | 1.0 | sugar kinase (by homology)                                              | YCR019w          | orf19.4548  |
| CA5302 | IPF20175    | 1.1  | -1.0 | 1.0  | 1.0 | unknown function                                                        |                  | orf19.7167  |
| CA5182 | IPF11093    | -1.0 | -1.0 | 1.1  | 1.0 | weak similarity to pig tubulin-tyrosine ligase                          | YBR094w          | orf19.4621  |
| CA1450 | IPF6474     | -1.0 | -1.1 | -1.0 | 1.0 | unknown function                                                        |                  | orf19.4414  |
| CA0976 | PEX17       | 1.0  | 1.1  | 1.1  | 1.0 | Peroxisomal peripheral membrane protein (by homology)                   |                  | orf19.11088 |
| CA5598 | IPF562      | 1.0  | 1.0  | 1.1  | 1.0 | unknown function                                                        | YGR099w          | orf19.7101  |
| CA4637 | IPF1514     | 1.0  | 1.1  | 1.0  | 1.0 | unknown function                                                        |                  | orf19.344   |
| CA5324 | IPF2140     | -1.0 | 1.0  | 1.1  | 1.0 | unknown function                                                        | YNL288w          | orf19.7198  |
| CA4321 | KAR3.53     | -1.0 | -1.0 | -1.0 | 1.0 | Kinesin-related protein, internal fragment                              | YPR141c          | orf19.4100  |
| CA2309 | IPF9875     | 1.1  | 1.1  | 1.0  | 1.0 | unknown function                                                        |                  | orf19.1374  |
| CA1103 | IPF5673     | 1.0  | 1.1  | -1.0 | 1.0 | similar to <i>Saccharomyces cerevisiae</i> Rex3p RNA exonu              | YLR107w          | orf19.12413 |
| CA4588 | BEL1.EXON1  | 1.3  | 1.0  | 1.1  | 1.0 | protein of the 40S ribosomal subunit, exon 1 (by homolo                 | YMR116c          | orf19.6906  |
| CA5272 | IPF1770     | -1.1 | -1.0 | -1.1 | 1.0 | unknown function                                                        |                  | orf19.4988  |
| CA2530 | IPF12782    | -1.1 | 1.0  | -1.0 | 1.0 | unknown function                                                        | YNL294c          | orf19.3176  |
| CA2235 | MPD1        | 1.1  | 1.0  | 1.0  | 1.0 | disulfide isomerase related protein (by homology)                       | YOR288c          | orf19.3920  |
| CA1217 | IPF13909    | -1.0 | 1.0  | 1.0  | 1.0 | Unknown function                                                        |                  | orf19.7770  |
| CA3201 | IPF3444.3F  | 1.0  | 1.0  | 1.0  | 1.0 | unknown function, 3-prime end                                           |                  | orf19.6182  |
| CA1310 | IPF14232    | 1.0  | -1.0 | 1.0  | 1.0 | unknown function                                                        |                  | orf19.11114 |
| CA4275 | MDJ1        | 1.0  | 1.0  | 1.0  | 1.0 | Heat shock protein - chaperone (by homology)                            | YFL016c          | orf19.6672  |
| CA4045 | ABP140      | -1.0 | -1.0 | -1.0 | 1.0 | putative methyltransferase (by homology)                                | YOR240w          | orf19.3676  |
| CA3925 | IPF13257    | 1.0  | 1.0  | 1.1  | 1.0 | unknown function                                                        |                  | orf19.5110  |
| CA5040 | BAT22       | -1.1 | -1.1 | 1.1  | 1.0 | branched chain amino acid aminotransferase (by homology)                |                  | orf19.6994  |
| CA0844 | CDC3        | -1.0 | -1.1 | -1.1 | 1.0 | Cell division control protein                                           | YLR314c          | orf19.8657  |
| CA0366 | IPF19017    | 1.0  | 1.0  | 1.0  | 1.0 | unknown function                                                        | Missing in array | orf19.8931  |
| CA4847 | IPF6951     | 1.0  | 1.2  | -1.0 | 1.0 | similar to <i>Saccharomyces cerevisiae</i> Ubp11p ubiquitin (           | YKR098c          | orf19.3815  |
| CA0067 | IPF13904    | 1.2  | 1.1  | 1.1  | 1.0 | farnesyl cysteine carboxyl-methyltransferase (by homology)              |                  | orf19.120   |
| CA1864 | IPF7644     | -1.0 | 1.0  | 1.0  | 1.0 | unknown function                                                        |                  | orf19.862   |
| CA5927 | DRS22       | -1.1 | 1.0  | 1.1  | 1.0 | Membrane-spanning Ca-ATPase (by homology)                               | YAL026c          | orf19.6778  |
| CA4568 | IPF9554     | -1.1 | 1.1  | -1.1 | 1.0 | unknown function                                                        | YPR105c          | orf19.6880  |
| CA0231 | RAD23       | -1.2 | -1.2 | -1.3 | 1.0 | nucleotide excision repair protein(ubiquitin-like protein)              | YEL037c          | orf19.1494  |
| CA5931 | ECM29.EXON1 | -1.1 | 1.0  | -1.1 | 1.0 | Involved in cell wall biogenesis and architecture, exon 1 (by homology) |                  | orf19.6772  |
| CA4112 | BIM1        | -1.0 | 1.0  | -1.0 | 1.0 | microtubule-binding protein (by homology)                               | YER016w          | orf19.676   |
| CA5445 | IPF232      | 1.0  | 1.0  | 1.0  | 1.0 | unknown function                                                        |                  | orf19.3248  |
| CA6091 | UFD2        | -1.4 | 1.0  | 1.0  | 1.0 | Ubiquitin fusion degradation protein 2 (by homology)                    | YDL190c          | orf19.5965  |
| CA4031 | IPF11077    | 1.0  | 1.1  | -1.0 | 1.0 | membrane transporter (by homology)                                      |                  | orf19.3432  |
| CA5995 | IPF676      | 1.0  | 1.1  | 1.1  | 1.0 | unknown function                                                        |                  | orf19.7595  |
| CA5736 | OPI3        | 1.5  | -1.0 | 1.2  | 1.0 | Methylene-fatty-acyl-phospholipid synthase (by homolo                   | YJR073c          | orf19.7446  |

|        |          |      |      |      |     |                                                                     |          |             |
|--------|----------|------|------|------|-----|---------------------------------------------------------------------|----------|-------------|
| CA3501 | CDC40    | -1.0 | 1.1  | -1.0 | 1.0 | cell division control protein (by homology)                         | YDR364c  | orf19.6347  |
| CA4500 | IPF11319 | -1.0 | -1.0 | -1.0 | 1.0 | unknown function                                                    |          | orf19.8141  |
| CA6028 | IPF607   | -1.0 | 1.0  | -1.1 | 1.0 | unknown function                                                    | YDL003w  | orf19.7634  |
| CA4688 | NBN1     | 1.0  | -1.0 | 1.0  | 1.0 | involved in chromatin remodeling and possibly transcrip             | YHR090c  | orf19.878   |
| CA4236 | IPF8166  | -1.0 | 1.0  | 1.0  | 1.0 | unknown function                                                    | YBL025w  | orf19.519   |
| CA1507 | HSP30    | 1.0  | -1.0 | 1.0  | 1.0 | heat shock protein (by homology)                                    | YCR021c  | orf19.4526  |
| CA1440 | RPL17B   | 1.0  | -1.3 | -1.1 | 1.0 | RPL17B ribosomal protein L17.e                                      | YJL177w  | orf19.4490  |
| CA4606 | IPF6224  | 1.0  | -1.0 | 1.1  | 1.0 | unknown function                                                    |          | orf19.3296  |
| CA2085 | IPF3388  | -1.0 | 1.1  | 1.1  | 1.0 | unknown function                                                    | YHR204w  | orf19.834   |
| CA1237 | IPF15784 | 1.0  | -1.0 | -1.1 | 1.0 | unknown function                                                    |          | orf19.8334  |
| CA0148 | POP1     | -1.0 | -1.0 | -1.0 | 1.0 | protein component of ribonuclease P and ribonuclease I              | YNL221c  | orf19.2404  |
| CA3680 | IPF8395  | -1.0 | 1.0  | -1.0 | 1.0 | unknown function                                                    |          | orf19.729   |
| CA2152 | IPF7899  | 1.0  | 1.0  | -1.0 | 1.0 | unknown function                                                    |          | orf19.6024  |
| CA3937 | IPF14686 | -1.0 | 1.1  | -1.0 | 1.0 | unknown function                                                    | YPL162c  | orf19.9557  |
| CA2094 | IPF11493 | 1.0  | -1.0 | 1.1  | 1.0 | unknown function                                                    |          | orf19.9929  |
| CA4640 | IPF1506  | -1.0 | 1.0  | -1.0 | 1.0 | unknown function                                                    |          | orf19.347   |
| CA4956 | IPF4583  | 1.0  | 1.0  | 1.1  | 1.0 | putative allantate permease (by homology)                           | YIL166c  | orf19.6520  |
| CA5123 | IPF1306  | -1.0 | -1.0 | 1.0  | 1.0 | unknown function                                                    | YAL018c  | orf19.6405  |
| CA4955 | IPF4580  | 1.0  | -1.0 | -1.0 | 1.0 | putative allantate permease (by homology)                           |          | orf19.6522  |
| CA0179 | DCP1     | 1.0  | 1.0  | 1.1  | 1.0 | mRNA decapping enzyme (by homology)                                 | YOL149w  | orf19.423   |
| CA4048 | IPF9207  | -1.0 | -1.0 | 1.1  | 1.0 | unknown function                                                    | YNL200c  | orf19.11163 |
| CA4612 | PPM2     | -1.1 | -1.1 | -1.1 | 1.0 | carboxy methyl transferase                                          | YOL141w  | orf19.3303  |
| CA1521 | FTH1     | 1.0  | 1.0  | -1.0 | 1.0 | iron transporter                                                    | YBR207w  | orf19.4802  |
| CA1882 | IPF19934 | -1.0 | 1.0  | -1.0 | 1.0 | unknown function                                                    |          | orf19.9755  |
| CA5576 | PRP4     | -1.0 | 1.0  | 1.0  | 1.0 | pre-mRNA-processing U4/U6 small nuclear ribonucleop                 | YPR178w  | orf19.7343  |
| CA4276 | HEX1     | -1.0 | -1.0 | 1.1  | 1.0 | $\beta$ -N-acetylglucosaminidase                                    |          | orf19.6673  |
| CA3478 | IPF3227  | 1.0  | -1.0 | -1.1 | 1.0 | similar to <i>Saccharomyces cerevisiae</i> chromatin assemb         | YBR195c  | orf19.3581  |
| CA4234 | HAP3     | 1.1  | -1.0 | 1.1  | 1.0 | CCAAT-binding factor subunit (by homology)                          | YBL021c  | orf19.517   |
| CA2502 | IPF20103 | 1.1  | -1.1 | 1.0  | 1.0 | unknown function                                                    |          | orf19.5588  |
| CA0307 | IPF4719  | 1.0  | 1.0  | 1.1  | 1.0 | similar to <i>Saccharomyces cerevisiae</i> Kar4p regulatory p       | YCL055w  | orf19.3736  |
| CA2556 | FRE5     | 1.0  | 1.0  | 1.0  | 1.0 | ferric reductase transmembrane component (by homology)              |          | orf19.5634  |
| CA1240 | IPF14026 | 1.1  | -1.1 | -1.0 | 1.0 | similar to <i>Saccharomyces cerevisiae</i> Rrn11p involved in       | YML043c  | orf19.8337  |
| CA0957 | IPF14322 | 1.0  | 1.0  | -1.0 | 1.0 | unknown function                                                    | YNL051w  |             |
| CA1486 | IPF10521 | 1.1  | 1.1  | -1.0 | 1.0 | unknown function                                                    |          | orf19.4062  |
| CA2167 | IPF4553  | -1.1 | 1.1  | -1.0 | 1.0 | unknown function                                                    | YDL048c  | orf19.909   |
| CA1599 | IPF11452 | 1.0  | 1.0  | 1.0  | 1.0 | unknown function                                                    | YDR030c  | orf19.7900  |
| CA3735 | IPF5534  | 1.0  | -1.0 | 1.0  | 1.0 | 5-oxo-1,2,5-tricarboxylic-3-penten acid decarboxylase (by homology) |          | orf19.2184  |
| CA4802 | ILV3     | 2.8  | 1.0  | 1.0  | 1.0 | dihydroxyacid dehydratase (by homology)                             | YJR016c  | orf19.4040  |
| CA3774 | IPF10437 | 1.0  | -1.0 | 1.0  | 1.0 | budding protein-like (by homology)                                  | YHR103w  | orf19.2892  |
| CA3313 | IPF8811  | -1.2 | 1.0  | -1.1 | 1.0 | unknown function                                                    |          | orf19.2304  |
| CA1853 | LYP1     | 1.4  | 1.0  | 1.3  | 1.0 | lysine-specific high-affinity permease (by homology)                |          | orf19.651   |
| CA2088 | IPF3394  | -1.0 | 1.1  | 1.1  | 1.0 | unknown function                                                    | YFL017wa |             |
| CA4757 | LIP10    | 1.1  | -1.0 | 1.0  | 1.0 | Secretory lipase                                                    |          | orf19.4822  |
| CA5852 | ATP17.3  | 1.2  | 1.1  | 1.1  | 1.0 | F1F0-ATPase complex, F1 delta subunit f, 3-prime end                | YDR377w  |             |
| CA5072 | IPF3598  | -1.2 | 1.0  | 1.1  | 1.0 | similar to <i>Saccharomyces cerevisiae</i> Sip3p protein whic       | YNL257c  | orf19.3047  |
| CA3772 | VMA8     | -1.0 | -1.1 | -1.0 | 1.0 | CANAL VACUOLAR ATP SYNTHASE SUBUNIT D                               | YEL051w  | orf19.2895  |
| CA1278 | IPF10835 | 1.0  | 1.1  | 1.1  | 1.0 | unknown function                                                    | YER124c  | orf19.3629  |
| CA4202 | IPF8047  | 1.1  | 1.1  | 1.1  | 1.0 | unknown function                                                    |          | orf19.4544  |
| CA3264 | IPF5035  | 1.0  | 1.0  | 1.0  | 1.0 | unknown function                                                    | YLL014w  | orf19.2698  |

|           |              |      |      |      |     |                                                               |                            |             |
|-----------|--------------|------|------|------|-----|---------------------------------------------------------------|----------------------------|-------------|
| LacZ 5end |              | 1.1  | 1.0  | 1.1  | 1.0 |                                                               |                            |             |
| CA2262    | IPF6857      | 1.0  | 1.1  | 1.0  | 1.0 | putative transcriptional regulator (unknown function)         | YDR253c                    | orf19.1757  |
| CA1055    | IPF17504     | -1.1 | -1.1 | -1.1 | 1.0 | unknown function                                              | YBL055c                    | orf19.2541  |
| CA5825    | IPF2489      | 1.0  | 1.1  | 1.1  | 1.0 | unknown function                                              |                            | orf19.7480  |
| CA0354    | YAK1.5F      | 1.0  | 1.1  | 1.0  | 1.0 | serine/threonine protein kinase, 5-prime end (by homology)    |                            | orf19.7788  |
| CA1549    | IPF8744      | -1.2 | 1.1  | 1.1  | 1.0 | unknown function                                              | YKL005c                    | orf19.4278  |
| CA5160    | PHO89        | 1.1  | -1.0 | 1.1  | 1.0 | Na <sup>+</sup> -coupled phosphate transport (by homology)    | YBR296c                    | orf19.4599  |
| CA3394    | IPF6747      | -1.0 | -1.0 | -1.0 | 1.0 | similar to <i>Saccharomyces cerevisiae</i> Stb2p involved Sin | YMR053c                    | orf19.7946  |
| CA0790    | IPF14193     | 1.2  | 1.0  | 1.1  | 1.0 | unknown function                                              | YHR059w                    | orf19.3357  |
| CA4933    | IPF8372      | 1.1  | -1.1 | -1.1 | 1.0 | unknown function                                              | YDL166c                    | orf19.6074  |
| CA2653    | IPF8472.3EOC | 1.1  | -1.0 | 1.1  | 1.0 | unknown function, 3-prime end                                 | YLR381w                    | orf19.5701  |
| CA3103    | IPF12086     | 1.0  | -1.0 | 1.0  | 1.0 | unknown function                                              | YKL084w                    | orf19.13908 |
| CA1798    | IPF11448     | 1.1  | -1.1 | 1.1  | 1.0 | unknown function                                              |                            | orf19.2923  |
| CA5306    | NPT1         | -1.0 | -1.0 | -1.1 | 1.0 | Nicotinate phosphoribosyltransferase (by homology)            | YOR209c                    | orf19.7176  |
| CA6030    | YHB2         | 1.0  | 1.0  | 1.1  | 1.0 | flavohepotein (by homology)                                   |                            | orf19.7637  |
| CA0797    | IPF13564     | 1.0  | 1.0  | -1.0 | 1.0 | putative arylsulfatase (by homology)                          |                            | orf19.1608  |
| CA2229    | IPF5682      | -1.0 | 1.1  | 1.1  | 1.0 | unknown function                                              |                            | orf19.5814  |
| CA0536    | PANC.3       | 1.0  | -1.0 | 1.0  | 1.0 | pantothenate synthetase, 3-prime end (by homology)            | YIL145c ; Missing in array | orf19.2815  |
| CA4789    | IPF3366      | 1.1  | 1.0  | 1.0  | 1.0 | Mitochondrial ribosomal protein (by homology)                 | YPR166c                    | orf19.4023  |
| CA3638    | IPF9252      | -1.0 | 1.0  | 1.0  | 1.0 | unknown function                                              |                            | orf19.5134  |
| CA3629    | IPF18316.5F  | -1.0 | -1.0 | 1.0  | 1.0 | unknown function, 5-prime end                                 |                            | orf19.12610 |
| CA0017    | IPF17811     | -1.0 | 1.3  | 1.1  | 1.0 | unknown function                                              |                            |             |
| CA3799    | IPF7198      | 1.1  | -1.0 | 1.0  | 1.0 | unknown function                                              |                            | orf19.10015 |
| CA1282    | PF10171.EXON | 1.1  | -1.0 | 1.1  | 1.0 | unknown function, exon 2                                      |                            |             |
| KanMX     |              | -1.0 | 1.1  | 1.1  | 1.0 |                                                               |                            |             |
| CA0051    | IPF4443      | 1.0  | -1.0 | 1.0  | 1.0 | unknown function                                              |                            | orf19.12177 |
| CA5831    | MRPL6        | 1.1  | -1.0 | -1.1 | 1.0 | ribosomal protein L6 precursor, mitochondrial (by homo        | YHR147c                    | orf19.7486  |
| CA1774    | IPF7498      | 1.1  | -1.0 | -1.0 | 1.0 | unknown function                                              | YBR246w                    | orf19.2191  |
| CA2517    | IPF4311      | -1.0 | -1.0 | 1.0  | 1.0 | unknown function                                              |                            | orf19.5514  |
| CA5059    | IPF3691      | 1.0  | 1.1  | 1.0  | 1.0 | unknown function                                              |                            | orf19.3027  |
| CA6074    | IPF11        | 1.0  | -1.0 | -1.0 | 1.0 | unknown function                                              | YOL124c                    | orf19.5987  |
| CA4410    | TRP4         | -1.0 | -1.1 | 1.0  | 1.0 | Anthranilate phosphoribosyltransferase                        | YDR354w                    | orf19.3099  |
| CA2376    | IPF15506     | -1.1 | -1.1 | -1.1 | 1.0 | unknown function                                              | YGR042w                    | orf19.2213  |
| CA3472    | PF6305.EXON  | 1.1  | 1.1  | -1.0 | 1.0 | unknown function, exon 2                                      | YLR218c                    |             |
| CA2621    | IPF9499      | 1.0  | -1.0 | 1.0  | 1.0 | probable transcription factor (by homology)                   |                            | orf19.2808  |
| CA5101    | LCB1         | -1.0 | 1.0  | 1.3  | 1.0 | Serine C-palmitoyltransferase subunit (by homology)           | YMR296c                    | orf19.6438  |
| CA5216    | IPF3069      | 1.0  | -1.0 | -1.1 | 1.0 | unknown function                                              |                            | orf19.7034  |
| CA3421    | IPF19782     | -1.0 | -1.0 | -1.1 | 1.0 | unknown function                                              |                            | orf19.13554 |
| CA1031    | IPF17469     | 1.1  | -1.0 | -1.0 | 1.0 | unknown function                                              |                            | orf19.3848  |
| CA2934    | IPF11515     | 1.0  | -1.0 | -1.0 | 1.0 | similar to <i>Saccharomyces cerevisiae</i> Lcb3p sphingoid b  | YJL134w                    | orf19.3329  |
| CA3625    | CYR1.3F      | 1.0  | 1.1  | 1.1  | 1.0 | adenylate cyclase, 3-prime end                                | YJL005w                    | orf19.12617 |
| CA2193    | IPF14273     | -1.0 | -1.0 | 1.1  | 1.0 | Probable ser/thr protein kinase (by homology)                 | YKL116c                    | orf19.11824 |
| CA2087    | IPF3393      | -1.1 | 1.1  | -1.0 | 1.0 | unknown function                                              |                            | orf19.836   |
| CA1648    | IPF16662     | 1.0  | 1.0  | 1.0  | 1.0 | unknown function                                              | YBR257w                    | orf19.5567  |
| CA5803    | IPF4163      | 1.1  | -1.0 | 1.1  | 1.0 | unknown function                                              | YKL047w                    | orf19.5457  |
| CA1675    | IPF5192      | 1.0  | 1.0  | 1.0  | 1.0 | unknown function                                              | YPL191c                    | orf19.3615  |
| CA0238    | PHA2.3       | 1.1  | 1.0  | 1.1  | 1.0 | prephenate dehydratase, 3-prime end (by homology)             | YNL316c                    | orf19.7864  |
| CA2380    | IPF4072      | -1.1 | -1.1 | 1.7  | 1.0 | unknown function                                              |                            | orf19.2217  |
| CA3116    | LAB2         | -1.0 | -1.0 | 1.1  | 1.0 | LIPOATE BIOSYNTHESIS PROTEIN by homology                      | YLR239c                    | orf19.3010  |

|        |              |      |      |      |     |                                                                                            |                  |             |
|--------|--------------|------|------|------|-----|--------------------------------------------------------------------------------------------|------------------|-------------|
| CA0337 | IPF9867      | -1.0 | -1.0 | 1.0  | 1.0 | unknown function                                                                           |                  | orf19.1370  |
| CA5778 | IPF1119      | 1.0  | 1.0  | 1.1  | 1.0 | unknown function                                                                           | YIL009ca         | orf19.5423  |
| CA1959 | IFD2         | 1.0  | 1.1  | 1.1  | 1.0 | putative oxidoreductase (by homology)                                                      | YPL088w          | orf19.771   |
| CA2147 | IPF18533     | 1.0  | -1.0 | 1.1  | 1.0 | unknown function                                                                           |                  | orf19.2516  |
| CA2872 | APG13        | -1.0 | 1.0  | 1.0  | 1.0 | probable component of the autophagic system (by homology)                                  | YPR185w          | orf19.2848  |
| CA5833 | IMP3         | 1.1  | 1.0  | -1.0 | 1.0 | U3 small nucleolar ribonucleoprotein (by homology)                                         | YHR148w          | orf19.7488  |
| CA2963 | GRP3         | 1.0  | -1.0 | 1.0  | 1.0 | dihydroflavonol-4-reductases (by homology)                                                 | YOL151w          | orf19.5611  |
| CA3671 | IPF13933     | 1.0  | -1.0 | -1.0 | 1.0 | unknown function                                                                           | YBL086c          | orf19.6457  |
| CA0346 | ROX1         | 1.1  | 1.0  | -1.0 | 1.0 | Possible heme-dependent transcriptional repressor (by homology)                            | YPR065w          | orf19.10341 |
| CA4693 | IPF3952      | 1.0  | 1.0  | 1.0  | 1.0 | unknown function                                                                           |                  | orf19.872   |
| CA5480 | IPF8210      | -1.0 | 1.0  | -1.0 | 1.0 | unknown function                                                                           | YNL103w          | orf19.5312  |
| CA1429 | IPF15123     | 1.1  | 1.0  | 1.0  | 1.0 | unknown function                                                                           |                  | orf19.13171 |
| CA1445 | MRP51        | 1.1  | -1.0 | -1.0 | 1.0 | Mitochondrial ribosomal protein of the small subunit (by homology)                         | YPL118w          | orf19.185   |
| CA3781 | IPF11224     | -1.0 | 1.0  | -1.0 | 1.0 | similar to <i>Saccharomyces cerevisiae</i> Pdr16p protein involved in mitochondrial import | YNL231c          | orf19.5839  |
| CA0284 | IPF14657     | 1.0  | -1.0 | -1.1 | 1.0 | unknown function                                                                           |                  | orf19.1441  |
| CA0762 | TAF67        | -1.0 | -1.0 | -1.0 | 1.0 | TFIID subunit (by homology)                                                                | YMR227c          | orf19.9147  |
| CA1681 | IPF12676     | 1.1  | 1.0  | 1.0  | 1.0 | unknown function                                                                           | YOL086wa         | orf19.4914  |
| CA4478 | IPF6461      | 1.1  | 1.0  | -1.0 | 1.0 | unknown function                                                                           | YKR043c          | orf19.1889  |
| CA5734 | IPF20029     | 1.1  | 1.0  | 1.0  | 1.0 | unknown function                                                                           | YOR352w          | orf19.7444  |
| CA1014 | MES1         | -1.1 | 1.0  | 1.1  | 1.0 | methionyl-tRNA synthetase (by homology)                                                    | YGR264c          | orf19.11437 |
| CA0166 | PF19161.53EO | 1.0  | -1.0 | -1.0 | 1.0 | unknown function, internal fragment                                                        | Missing in array |             |
| CA0024 | RPC31.5EOC   | -1.0 | 1.0  | 1.0  | 1.0 | DNA-directed RNA polymerase III, 5-prime end (by homology)                                 |                  | orf19.10349 |
| CA3865 | IPF4608      | 1.0  | -1.0 | -1.0 | 1.0 | unknown function                                                                           |                  | orf19.6084  |
| CA0192 | IPF15134     | -1.1 | -1.0 | -1.0 | 1.0 | Unknown function                                                                           | YNL206c          | orf19.1177  |
| CA4998 | IPF2026      | -1.0 | 1.1  | 1.1  | 1.0 | unknown function                                                                           |                  | orf19.5249  |
| CA1432 | APM3         | 1.0  | 1.1  | -1.0 | 1.0 | AP-3 complex subunit, mu3 subunit (by homology)                                            | YBR288c          | orf19.1204  |
| CA0353 | YAK1.3F      | 1.0  | -1.0 | 1.0  | 1.0 | serine/threonine protein kinase, 3-prime end (by homology)                                 | YJL141c          | orf19.147   |
| CA1747 | IPF10884     | -1.0 | -1.0 | 1.0  | 1.0 | unknown function                                                                           | YLR003c          | orf19.5049  |
| CA5100 | IPF1372      | -1.1 | -1.0 | 1.0  | 1.0 | unknown function                                                                           | YNL008c          | orf19.6440  |
| CA4303 | IFB1         | -1.0 | 1.0  | -1.1 | 1.0 | unknown function                                                                           |                  | orf19.6703  |
| CA1993 | IPF6614      | 1.1  | -1.0 | 1.0  | 1.0 | unknown function                                                                           |                  | orf19.6482  |
| CA0548 | PHO87        | -1.1 | -1.0 | 1.1  | 1.0 | Member of the phosphate permease family (by homology)                                      | YCR037c          | orf19.2454  |
| CA1807 | IPF6328      | 1.1  | 1.0  | -1.0 | 1.0 | unknown function                                                                           | YML030w          | orf19.1114  |
| CA5932 | UBI4         | 1.0  | 1.0  | -1.0 | 1.0 | Polyubiquitin                                                                              | YLL039c          | orf19.6771  |
| CA5335 | IPF894       | -1.0 | 1.0  | 1.1  | 1.0 | unknown function                                                                           |                  | orf19.7209  |
| CA1004 | IPF8901      | -1.1 | -1.1 | 1.2  | 1.0 | unknown function                                                                           | YDR105c          | orf19.3758  |
| CA3098 | SIS1         | -1.1 | 1.0  | -1.1 | 1.0 | heat shock protein (by homology)                                                           | YNL007c          | orf19.3861  |
| CA3620 | IPF9063      | 1.1  | 1.1  | 1.2  | 1.0 | similar to <i>Saccharomyces cerevisiae</i> Stb3p protein involved in mitochondrial import  | YDR169c          | orf19.203   |
| CA0815 | IPF16231     | 1.0  | 1.0  | 1.1  | 1.0 | unknown function                                                                           |                  | orf19.1913  |
| CA4540 | SMP2         | -1.1 | -1.0 | -1.1 | 1.0 | Involved in plasmid maintenance, respiration and cell cycle                                | YMR165c          | orf19.1462  |
| CA1490 | IPF165       | 1.1  | -1.2 | -1.0 | 1.0 | unknown function                                                                           |                  |             |
| CA4177 | MGM101       | -1.0 | 1.0  | 1.1  | 1.0 | mitochondrial genome maintenance protein                                                   | YJR144w          | orf19.2956  |
| CA6077 | IPF16        | -1.0 | -1.1 | -1.0 | 1.0 | unknown function                                                                           | YOL073c          | orf19.5984  |
| CA2975 | ARO9         | 1.0  | 1.1  | 1.1  | 1.0 | aromatic amino acid aminotransferase II (by homology)                                      | YHR137w          | orf19.8822  |
| CA0633 | IPF16269     | 1.0  | -1.0 | 1.0  | 1.0 | unknown function                                                                           | YGR278w          | orf19.9340  |
| CA1369 | IPF15968     | -1.0 | -1.0 | 1.0  | 1.0 | unknown function                                                                           | YGL174w          | orf19.4964  |
| CA3884 | IPF6367      | 1.0  | 1.0  | 1.0  | 1.0 | unknown function                                                                           | YPL247c          | orf19.8014  |
| CA2050 | IPF11023     | 1.1  | -1.0 | -1.0 | 1.0 | unknown function                                                                           |                  | orf19.13147 |
| CA4628 | IPF13704     | 1.1  | 1.0  | -1.0 | 1.0 | unknown function                                                                           |                  |             |

|         |              |      |      |      |     |                                                                                               |         |             |
|---------|--------------|------|------|------|-----|-----------------------------------------------------------------------------------------------|---------|-------------|
| CA3649  | IPF4132      | -1.0 | -1.0 | -1.0 | 1.0 | unknown function                                                                              | YPR048w | orf19.2040  |
| CA5966  | IPF959       | 1.0  | -1.0 | 1.0  | 1.0 | unknown function                                                                              |         | orf19.7556  |
| CA5885  | IPF2419      | 1.1  | 1.1  | 1.0  | 1.0 | unknown function                                                                              |         | orf19.6824  |
| CA5209  | MCM1         | 1.0  | -1.0 | 1.2  | 1.0 | Transcription factor of the MADS box (by homology)                                            | YMR043w | orf19.7025  |
| CA2551  | IPF9098      | 1.1  | 1.0  | 1.0  | 1.0 | unknown function                                                                              |         | orf19.2836  |
| CA3048  | IPF14991     | 1.1  | 1.0  | 1.1  | 1.0 | unknown function                                                                              | YJR044c | orf19.9950  |
| CA5574  | IPF2007      | 1.0  | 1.0  | -1.0 | 1.0 | unknown function                                                                              |         | orf19.7341  |
| CA2407  | ECM14        | -1.1 | 1.1  | 1.1  | 1.0 | carboxypeptidase involved in cell wall biogenesis and ai                                      | YHR132c | orf19.299   |
| 14432.2 |              | -1.1 | 1.0  | 1.1  | 1.0 |                                                                                               |         |             |
| CA1248  | IPF3866      | 1.0  | 1.1  | 1.0  | 1.0 | unknown function                                                                              | YLR251w | orf19.7692  |
| CA2820  | HOL1         | 1.0  | -1.1 | 1.0  | 1.0 | member of major facilitator superfamily multidrug-resistance protein subfamily 1 by hc        |         | orf19.2991  |
| CA3971  | IPF6498      | 1.0  | -1.0 | -1.1 | 1.0 | unknown function                                                                              |         | orf19.1543  |
| CA0780  | CIRT1A       | -1.0 | -1.1 | 1.0  | 1.0 | transposase                                                                                   |         | orf19.3492  |
| CA3401  | IPF8652      | -1.0 | -1.0 | -1.1 | 1.0 | putative GTP-binding protein (by homology)                                                    | YGR173w | orf19.3977  |
| CA4786  | IPF3362      | 1.0  | -1.0 | 1.1  | 1.0 | Unknown function                                                                              | YBL046w | orf19.4019  |
| CA4958  | RAD14        | -1.0 | 1.0  | -1.0 | 1.0 | nucleotide excision repair protein (by homology)                                              | YMR201c | orf19.6517  |
| CA4110  | IPF3965      | 1.1  | 1.0  | 1.0  | 1.0 | unknown function                                                                              | YDL209c | orf19.674   |
| CA5515  | SAT2         | -1.0 | 1.1  | 1.1  | 1.0 | putative glycosyl-transferase involved in osmotolerance                                       | YBR070c | orf19.5363  |
| CA4982  | NUT2         | 1.1  | -1.0 | 1.0  | 1.0 | Negative transcription regulator from artificial reporters (                                  | YPR168w | orf19.5268  |
| CA3358  | IPF19984     | 1.1  | 1.2  | 1.1  | 1.0 | similar to <i>Saccharomyces cerevisiae</i> Cat5p involved in c                                | YOR125c | orf19.1940  |
| CA1966  | IFR4         | 1.0  | 1.0  | 1.1  | 1.0 | unknown function                                                                              | YNL134c | orf19.2394  |
| CA5367  | RIM101       | 1.1  | 1.0  | 1.1  | 1.0 | Zn finger transcription factor homolog                                                        | YHL027w | orf19.7247  |
| CA5760  | IPF1072      | 1.0  | 1.1  | 1.1  | 1.0 | unknown function                                                                              | YGL005c | orf19.5397  |
| CA2261  | RAS1         | -1.0 | 1.1  | 1.1  | 1.0 | GTP-binding protein (by homology)                                                             | YNL098c | orf19.1760  |
| CA2871  | OPT2.3F      | 1.1  | 1.0  | 1.0  | 1.0 | Oligopeptide transporter, 3-prime end (by homology)                                           |         | orf19.2847  |
| CA3189  | IPF11607     | 1.0  | 1.1  | 1.1  | 1.0 | unknown function                                                                              | YPR003c | orf19.2149  |
| CA4522  | RPT4         | -1.0 | -1.1 | -1.1 | 1.0 | 26S proteasome regulatory subunit (by homology)                                               | YOR259c | orf19.482   |
| CA6162  | IPF1833      | 1.0  | 1.0  | 1.0  | 1.0 | similar to opaque phase protein OP4 (by homology)                                             |         | orf19.5874  |
| CA2431  | IPF12951     | -1.0 | 1.1  | 1.0  | 1.0 | unknown function                                                                              | YDR486c | orf19.3401  |
| CA5393  | IPF9398      | -1.0 | 1.0  | -1.0 | 1.0 | unknown function                                                                              |         | orf19.936   |
| CA5439  | TAF25        | -1.0 | -1.0 | -1.2 | 1.0 | transcription initiation factor TFIID subunit (by homology)                                   | YDR167w | orf19.3242  |
| CA3041  | IPF7303      | -1.0 | 1.0  | -1.1 | 1.0 | unknown function                                                                              | YBR239c | orf19.2423  |
| CA5928  | IPF2815      | 1.0  | 1.0  | 1.0  | 1.0 | unknown function                                                                              |         | orf19.6777  |
| CA5455  | IPF263.3     | 1.0  | 1.0  | 1.1  | 1.0 | member of the FRP family of proteins related to <i>Yarrowia lipolytica</i> glyoxylate pathway |         | orf19.3263  |
| CA3439  | IPF11329     | 1.0  | 1.0  | 1.1  | 1.0 | unknown function                                                                              |         | orf19.2986  |
| CA0941  | IPF8617      | -1.1 | 1.0  | -1.0 | 1.0 | unknown function                                                                              | YCR079w | orf19.3705  |
| CA3928  | GAL11        | 1.1  | 1.0  | 1.1  | 1.0 | DNA-directed RNA polymerase II holoenzyme and Korn                                            | YOL051w | orf19.5105  |
| CA2614  | CTA241.EXON2 | -1.0 | -1.0 | -1.0 | 1.0 | transcriptional activator, exon 2                                                             |         |             |
| CA0151  | PF15923.5EOC | 1.1  | -1.0 | -1.0 | 1.0 | unknown function, 5-prime end                                                                 |         | orf19.177   |
| CA3636  | IFA21        | -1.0 | -1.1 | -1.1 | 1.0 | unknown function                                                                              |         | orf19.12603 |
| CA2639  | IPF2932      | -1.0 | 1.1  | 1.1  | 1.0 | unknown function                                                                              |         | orf19.4305  |
| CA3998  | IPF10443     | 1.0  | -1.0 | 1.0  | 1.0 | formamidase-like protein (by homology)                                                        |         | orf19.1641  |
| CA6148  | IPF1862.3F   | 1.1  | 1.0  | -1.0 | 1.0 | unknown function, 3-prime end                                                                 | YEL023c | orf19.5894  |
| CA6027  | IPF609       | -1.0 | 1.0  | -1.0 | 1.0 | unknown function                                                                              |         | orf19.7632  |
| CA1601  | IPF15728     | 1.0  | 1.0  | 1.1  | 1.0 | unknown function                                                                              |         | orf19.4721  |
| CA2145  | IPF12800     | -1.0 | -1.1 | -1.0 | 1.0 | unknown function                                                                              |         | orf19.2514  |
| CA5847  | CDA2         | -1.0 | 1.0  | -1.0 | 1.0 | chitin deacetylase (by homology)                                                              | YLR308w | orf19.7503  |
| CA5680  | CAM1.EXON2   | -1.1 | 1.2  | 1.2  | 1.0 | translation elongation factor eEF1 gamma, exon 2 (by homology)                                |         | orf19.7382  |
| CA1430  | IPF14331     | -1.0 | -1.0 | 1.0  | 1.0 | Probable extracellular alpha-1,4-glucan glucosidase (by homology)                             |         | orf19.3380  |



|          |              |      |      |      |     |                                                                              |                            |             |
|----------|--------------|------|------|------|-----|------------------------------------------------------------------------------|----------------------------|-------------|
| CA2014   | IPF1717      | 1.0  | 1.1  | 1.1  | 1.0 | similar to <i>Saccharomyces cerevisiae</i> Scc2p involved in                 | YDR180w                    | orf19.10592 |
| CA5909   | YSA1         | 1.1  | 1.0  | 1.1  | 1.0 | sugar-nucleotide hydrolase (by homology)                                     | YBR111c                    | orf19.6796  |
| CA0074   | IFD7         | 1.0  | -1.0 | -1.0 | 1.0 | Putative aryl-alcohol dehydrogenase (by homology)                            |                            | orf19.629   |
| CA4893   | IPF1621      | -1.1 | 1.1  | -1.0 | 1.0 | unknown function                                                             | YAL046c                    | orf19.6585  |
| CA4543   | PPE1         | -1.0 | 1.0  | 1.1  | 1.0 | Ribosomal protein of the small subunit, mitochondrial (b                     | YHR075c                    | orf19.1459  |
| CA4820   | IPF1196      | -1.0 | -1.0 | 1.0  | 1.0 | unknown function Hypothetical Zn(2)-Cys(6) zinc-finger protein (by homology) |                            | orf19.2077  |
| CA3641   | IPF4122      | 1.0  | -1.1 | 1.0  | 1.0 | unknown function                                                             |                            | orf19.2032  |
| CA0806   | IPF12567     | 1.0  | 1.0  | 1.0  | 1.0 | unknown function                                                             | YOR223w                    | orf19.3517  |
| CA1424   | IPF9090      | 1.1  | -1.0 | 1.0  | 1.0 | unknown function                                                             |                            | orf19.11282 |
| CA0059   | IPF17840     | 1.0  | -1.0 | 1.2  | 1.0 | unknown function                                                             |                            | orf19.566   |
| CA1166   | IFO1         | 1.0  | 1.0  | -1.0 | 1.0 | Unknown function                                                             |                            | orf19.1780  |
| CA5765   | SOF1         | -1.1 | -1.1 | -1.1 | 1.0 | Involved in 18S pre-rRNA production (by homology)                            | YLL011w                    | orf19.5407  |
| CA5217   | RFC2         | 1.1  | 1.0  | 1.0  | 1.0 | Replication factor (by homology)                                             | YJR068w                    | orf19.7035  |
| CA1219   | PRC2         | 1.0  | 1.0  | -1.0 | 1.0 | carboxypeptidase y precursor , serine-type protease (by homology)            |                            | orf19.4135  |
| CA4519   | IPF7088      | -1.0 | 1.1  | 1.1  | 1.0 | similar to <i>Saccharomyces cerevisiae</i> Nip100p myosin-iiI                | YPL174c                    | orf19.486   |
| CA3389   | IPF6754      | 1.0  | -1.0 | 1.1  | 1.0 | unknown function                                                             | YDR286c                    | orf19.7951  |
| CA1979   | IPF9577      | -1.0 | 1.0  | -1.0 | 1.0 | unknown function                                                             | YNL193w                    | orf19.686   |
| Int 3    |              | 1.0  | 1.0  | 1.0  | 1.0 |                                                                              |                            |             |
| CA5975   | SIK1         | 1.1  | 1.1  | 1.1  | 1.0 | nucleolar protein involved in pre-rRNA processing (by h                      | YLR197w                    | orf19.7569  |
| CA0032   | IPF15248     | -1.0 | 1.0  | 1.0  | 1.0 | zinc finger protein (by homology)                                            | YOL054w                    | orf19.229   |
| CA1951   | HEM14        | 1.1  | -1.0 | 1.0  | 1.0 | Mitochondrial protoporphyrinogen oxidase (by                                 | YER014w                    | orf19.12209 |
| CA5411   | IPF1558      | -1.0 | 1.0  | -1.1 | 1.0 | unknown function                                                             |                            | orf19.955   |
| Int 2    |              | 1.0  | 1.0  | 1.0  | 1.0 |                                                                              |                            |             |
| CA6007   | IPF650       | -1.0 | -1.0 | -1.0 | 1.0 | unknown function                                                             |                            | orf19.7608  |
| CA4299   | IPF2598      | 1.0  | 1.0  | -1.0 | 1.0 | unknown function                                                             | YCR024c                    | orf19.6698  |
| CA2794   | IPF8408      | 1.1  | 1.1  | 1.0  | 1.0 | unknown function                                                             |                            | orf19.1724  |
| CA0474   | IPF12887     | 1.0  | -1.0 | 1.0  | 1.0 | Putative multidrug protein (by homology)                                     |                            | orf19.12244 |
| CA5145   | SKI6         | 1.1  | 1.0  | 1.0  | 1.0 | 3 ->5' exoribonuclease (by homology)                                         |                            | orf19.4582  |
| CA2944   | IPF6294      | 1.0  | 1.0  | -1.0 | 1.0 | unknown function                                                             |                            | orf19.1968  |
| CA0993   | IPF11059     | -1.0 | -1.0 | -1.0 | 1.0 | unknown function                                                             |                            | orf19.8973  |
| CA5284   | UFE1         | -1.0 | 1.1  | -1.1 | 1.0 | Endoplasmic reticulum t-SNARE (by homology)                                  | YOR075w                    | orf19.7141  |
| CA3869   | IPF8831      | -1.0 | -1.1 | -1.2 | 1.0 | unknown function                                                             |                            | orf19.400   |
| CA3475   | BRO1         | 1.0  | 1.0  | -1.0 | 1.0 | required for normal response to nutrient                                     | limitator YPL084w          | orf19.1670  |
| CA0903   | IPF4401      | 1.5  | -1.0 | -1.0 | 1.0 | putative succinate dehydrogenase (by homology)                               | YMR118c                    | orf19.1480  |
| CA5845   | NAP1         | 1.1  | 1.1  | 1.0  | 1.0 | nucleosome assembly protein (by homology)                                    | YKR048c                    | orf19.7501  |
| CA1992   | F6617.REPEAT | 1.0  | 1.0  | 1.0  | 1.0 | unknown function, repeated protein                                           |                            | orf19.6484  |
| CA5829   | ADE1         | 1.1  | 1.0  | -1.0 | 1.0 | phosphoribosyl-amidoimidazole-succinocarboxamide sy                          | YAR015w                    | orf19.7484  |
| CA5092   | IPF1394      | 1.0  | -1.0 | 1.0  | 1.0 | unknown function                                                             |                            | orf19.6450  |
| CA5451   | SLN1         | -1.1 | -1.0 | -1.0 | 1.0 | Two-component signal transducer histidine kinase comp                        | YIL147c ; Missing in array | orf19.3256  |
| CA5459   | IPF276       | -1.0 | -1.0 | -1.0 | 1.0 | unknown function                                                             | YDR126w                    | orf19.3267  |
| CA3106   | IPF11821     | 1.1  | 1.0  | 1.1  | 1.0 | unknown function                                                             | YPR037c                    | orf19.6552  |
| CA2287   | IPF5373      | 1.1  | 1.0  | -1.0 | 1.0 | unknown function                                                             |                            | orf19.5555  |
| CA5653   | SSN8         | 1.0  | -1.0 | 1.0  | 1.0 | C-type cyclin associated with the Ssn3p cyclin-depende                       | YNL025c                    | orf19.7355  |
| CA3449   | IPF7320      | 1.0  | -1.1 | -1.0 | 1.0 | unknown function                                                             | YOR359w                    | orf19.2973  |
| CA1597   | IPF9538      | 1.0  | 1.0  | -1.0 | 1.0 | unknown function                                                             |                            | orf19.271   |
| CA2279   | DUR31        | -1.0 | 1.0  | 1.0  | 1.0 | Urea transport protein (by homology)                                         | YHL016c                    | orf19.781   |
| CA1542   | ROT11        | 1.0  | -1.0 | -1.0 | 1.0 | Putative membrane protein                                                    |                            | orf19.4566  |
| E coli 2 |              | -1.0 | -1.0 | 1.0  | 1.0 |                                                                              |                            |             |
| CA3888   | IPF12967     | 1.0  | 1.0  | -1.0 | 1.0 | unknown function                                                             |                            | orf19.5092  |

|        |             |      |      |      |     |                                                                    |         |            |
|--------|-------------|------|------|------|-----|--------------------------------------------------------------------|---------|------------|
| CA2349 | IFC3        | 1.0  | 1.1  | 1.0  | 1.0 | Unknown function                                                   | YPR194c | orf19.3749 |
| CA0380 | IPF14109    | 1.5  | -1.3 | 1.1  | 1.0 | unknown function                                                   |         | orf19.2451 |
| CA2220 | NTG1        | 1.0  | -1.1 | 1.1  | 1.0 | endonuclease III-like glycosylase (by homology)                    | YOL043c | orf19.5098 |
| CA3952 | IPF6716     | 1.0  | 1.0  | 1.0  | 1.0 | Phenylacetate 2-hydroxylase (by homology)                          |         | orf19.1411 |
| CA0221 | PUS4        | 1.0  | -1.0 | -1.0 | 1.0 | pseudouridine synthase (by homology)                               | YNL292w | orf19.9509 |
| CA5572 | BGL22       | -1.0 | -1.0 | -1.1 | 1.0 | endo-beta-1,3-glucanase (by homology)                              |         | orf19.7339 |
| CA4232 | IPF12484    | 1.0  | -1.1 | 1.0  | 1.0 | unknown function                                                   | YER137c | orf19.515  |
| CA1178 | IPF5062     | 1.0  | 1.0  | -1.0 | 1.0 | unknown function                                                   | YGR021w | orf19.805  |
| CA3434 | CCP1        | 1.1  | 1.1  | 1.1  | 1.0 | Cytochrome-c peroxidase precursor (by homology)                    | YKR066c | orf19.584  |
| CA4483 | IPF9156     | -1.1 | -1.1 | 1.0  | 1.0 | unknown function                                                   | YOR175c | orf19.1881 |
| CA4597 | ATP11       | 1.0  | -1.0 | -1.0 | 1.0 | F1F0-ATPase complex assembly protein (by homology)                 | YNL315c | orf19.6916 |
| CA3025 | IPF11503    | 1.0  | 1.1  | 1.1  | 1.0 | unknown function                                                   |         | orf19.3902 |
| CA4649 | GPX4        | 1.0  | 1.2  | 1.3  | 1.0 | glutathione peroxidase (by homology)                               |         | orf19.4436 |
| CA5156 | CLC1        | 1.2  | -1.1 | -1.2 | 1.0 | clathrin light chain (by homology)                                 | YGR167w | orf19.4594 |
| CA3049 | IPF14990    | 1.1  | 1.1  | 1.0  | 1.0 | unknown function                                                   | YAL014c | orf19.9949 |
| CA3275 | IPF17068    | -1.1 | -1.0 | -1.0 | 1.0 | unknown function                                                   |         | orf19.6309 |
| CA3621 | IPF8942     | -1.0 | 1.0  | 1.1  | 1.0 | unknown function                                                   |         | orf19.204  |
| CA1786 | IPF7629     | -1.0 | -1.1 | -1.1 | 1.0 | unknown function                                                   |         | orf19.1168 |
| CA1725 | IPF15985    | -1.0 | 1.0  | 1.0  | 1.0 | unknown function                                                   |         | orf19.2650 |
| CA1684 | IPF6070     | 1.0  | 1.0  | 1.0  | 1.0 | unknown function                                                   |         | orf19.4921 |
| CA0614 | IPF19700    | 1.2  | -1.0 | -1.0 | 1.0 | unknown function                                                   |         | orf19.1600 |
| CA0923 | IPF12987    | -1.0 | -1.0 | 1.0  | 1.0 | unknown function                                                   | YMR049c | orf19.1047 |
| CA3830 | SSF1        | 1.1  | 1.0  | -1.0 | 1.0 | mating protein (by homology)                                       | YDR312w | orf19.6589 |
| CA2660 | SAP1        | 1.0  | -1.0 | 1.1  | 1.0 | secreted aspartyl proteinase                                       |         | orf19.5714 |
| CA3079 | RAM2        | 1.0  | -1.0 | 1.0  | 1.0 | geranylgeranyltransferase type I alpha subunit                     | YKL019w | orf19.4817 |
| CA0432 | IPF7926     | 1.0  | -1.0 | -1.0 | 1.0 | putative protein kinase (by homology)                              |         | orf19.1341 |
| CA0857 | SEN15       | 1.0  | 1.0  | -1.0 | 1.0 | tRNA splicing endonuclease delta subunit (by homology)             |         | orf19.4464 |
| CA5660 | SKN1.3      | 1.0  | 1.0  | 1.0  | 1.0 | Glucan synthase subunit, 3-prime end                               |         | orf19.7362 |
| CA6158 | IPF1839     | 1.0  | -1.0 | 1.0  | 1.0 | putative 1-Acyl dihydroxyacetone phosphate reductase (by homology) |         | orf19.5879 |
| CA2523 | IPF4319     | 1.0  | 1.1  | 1.0  | 1.0 | unknown function                                                   |         | orf19.5520 |
| CA1109 | MRPS9       | 1.1  | -1.0 | -1.0 | 1.0 | ribosomal protein S9 small subunit precursor                       | YBR146w | orf19.5230 |
| CA2989 | SIN3.EXON3  | -1.2 | 1.0  | -1.1 | 1.0 | Histone deacetylase by homology                                    | YOL004w | orf19.6011 |
| CA2439 | IPF7514     | 1.0  | -1.0 | -1.0 | 1.0 | unknown function                                                   |         | orf19.2197 |
| CA4271 | SAP30       | 1.0  | 1.0  | -1.0 | 1.0 | Subunit of the histone deacetylase B complex (by homology)         | YMR263w | orf19.6667 |
| CA5615 | IPF520      | -1.0 | -1.0 | 1.1  | 1.0 | unknown function                                                   | YCL016c | orf19.7083 |
| CA0444 | IPF17429.3F | -1.1 | -1.1 | -1.2 | 1.0 | similar to <i>Saccharomyces cerevisiae</i> Sec5p required for      | YDR166c | orf19.75   |
| CA3788 | IPF16445    | -1.0 | 1.1  | 1.0  | 1.0 | unknown function                                                   |         | orf19.5831 |
| CA5208 | IPF2361     | -1.1 | 1.0  | 1.0  | 1.0 | unknown function                                                   | YLR455w | orf19.7023 |
| CA3753 | IPF14743    | -1.0 | -1.1 | -1.1 | 1.0 | unknown function                                                   |         | orf19.3425 |
| CA1876 | IPF10301    | -1.1 | -1.2 | -1.2 | 1.0 | putative 60S ribosomal protein L7/L12 homolog, mitochondrial       | YGL068w | orf19.2275 |
| CA1777 | IPF14706    | -1.0 | 1.0  | 1.0  | 1.0 | unknown function                                                   |         | orf19.1824 |
| CA5810 | IPF4137.3F  | 1.1  | 1.1  | 1.2  | 1.0 | unknown function, 3-prime end                                      |         |            |
| CA1079 | LIP1        | 1.1  | -1.0 | 1.2  | 1.0 | Secretory lipase                                                   |         | orf19.4821 |
| CA2111 | IPF13748    | 1.1  | 1.1  | 1.2  | 1.0 | Unknown function                                                   | YJL184w | orf19.3688 |
| CA0080 | IPF11378    | 1.1  | 1.0  | 1.1  | 1.0 | unknown function                                                   |         | orf19.632  |
| CA5384 | ZORRO1B.5F  | 1.0  | 1.1  | 1.0  | 1.0 | reverse transcriptase, 5-prime end (by homology)                   |         | orf19.7274 |
| CA4026 | IPF7175     | -1.0 | 1.1  | 1.0  | 1.0 | unknown function                                                   |         | orf19.3437 |
| CA3443 | IPF11324    | 1.0  | 1.1  | 1.0  | 1.0 | unknown function                                                   | YLR423c | orf19.2982 |
| CA2646 | IPF13089    | 1.2  | 1.0  | 1.1  | 1.0 | unknown function                                                   | YNL116w | orf19.1185 |

|        |              |      |      |      |     |                                                                                     |                            |             |
|--------|--------------|------|------|------|-----|-------------------------------------------------------------------------------------|----------------------------|-------------|
| CA5219 | YAE1         | 1.0  | -1.2 | 1.1  | 1.0 | Essential protein                                                                   | YJR067c                    | orf19.7037  |
| CA0575 | IPF15178     | 1.0  | 1.0  | 1.1  | 1.0 | Unknown function                                                                    |                            | orf19.1808  |
| CA1897 | IPF12002     | -1.1 | 1.1  | 1.2  | 1.0 | unknown function                                                                    |                            | orf19.10271 |
| CA5944 | IPF3491      | 1.1  | 1.0  | 1.0  | 1.0 | unknown function                                                                    | YBR062c                    | orf19.6753  |
| CA1233 | IPF11814     | 1.0  | 1.0  | -1.0 | 1.0 | unknown function                                                                    |                            | orf19.4983  |
| CA3704 | IPF5671      | -1.0 | 1.1  | -1.0 | 1.0 | unknown function                                                                    |                            | orf19.4946  |
| CA6117 | IPF122       | 1.0  | -1.0 | 1.0  | 1.0 | unknown function                                                                    |                            | orf19.5933  |
| CA2800 | IPF11366     | -1.0 | 1.1  | 1.0  | 1.0 | unknown function                                                                    |                            | orf19.1717  |
| CA2604 | IPF5469      | -1.0 | -1.0 | 1.1  | 1.0 | unknown function                                                                    |                            | orf19.5681  |
| CA3627 | IPF18318     | -1.2 | -1.0 | -1.1 | 1.0 | unknown function                                                                    | YLL007c                    | orf19.12613 |
| CA0043 | HRD1         | -1.3 | 1.0  | -1.1 | 1.0 | Involved in degradation of Hmg2p                                                    | YOL013c                    | orf19.719   |
| CA4200 | CCL1         | 1.1  | -1.0 | -1.0 | 1.0 | cyclin (by homology)                                                                | YPR025c                    | orf19.4542  |
| CA3143 | IPF8295      | -1.0 | 1.0  | 1.0  | 1.0 | unknown function                                                                    |                            | orf19.3714  |
| CA1376 | IPF7159      | 1.1  | 1.1  | 1.0  | 1.0 | unknown function                                                                    | YBL107c                    | orf19.8789  |
| CA4989 | IPF2041      | 1.1  | 1.1  | 1.0  | 1.0 | unknown function                                                                    |                            | orf19.5259  |
| CA4370 | IPF5279      | -1.2 | 1.1  | -1.1 | 1.0 | unknown function                                                                    | YHR076w                    | orf19.5661  |
| CA4652 | IPF3105      | -1.1 | -1.0 | 1.1  | 1.0 | Unknown function                                                                    |                            | orf19.4439  |
| CA2863 | IPF20117     | 1.0  | 1.0  | 1.0  | 1.0 | unknown function                                                                    | YLR421c                    | orf19.1058  |
| CA4325 | IPF2094      | 1.0  | 1.0  | -1.1 | 1.0 | unknown function                                                                    |                            | orf19.4094  |
| CA1718 | IPF9312      | 1.0  | -1.1 | 1.1  | 1.0 | unknown function                                                                    |                            | orf19.4649  |
| CA3542 | IPF5426      | 1.0  | -1.0 | -1.0 | 1.0 | putative methyltransferase (by homology)                                            | YML014w                    | orf19.6378  |
| CA1157 | PZF1         | 1.0  | -1.0 | 1.0  | 1.0 | TFIIIA (transcription initiation factor) (by homology)                              | YPR186c ; Missing in array | orf19.4125  |
| CA4346 | IPF3634      | 1.0  | -1.0 | 1.1  | 1.0 | unknown function                                                                    | YDR090c                    | orf19.6720  |
| CA2191 | IPF9417      | -1.0 | -1.0 | -1.0 | 1.0 | similar to Saccharomyces cerevisiae Hsf1p heat shock i                              | YGL073w                    | orf19.4775  |
| CA3258 | IFC2         | -1.0 | -1.0 | 1.0  | 1.0 | Unknown Function                                                                    |                            | orf19.11233 |
| CA0998 | IPF12369     | 1.0  | 1.0  | 1.1  | 1.0 | Putative dipeptidase (by homology)                                                  |                            | orf19.11846 |
| CA0191 | PEX7         | 1.0  | 1.1  | 1.0  | 1.0 | peroxisomal import protein (by homology)                                            | YDR142c                    | orf19.89    |
| CA0894 | ORM1         | -1.1 | -1.0 | 1.1  | 1.0 | unknown function                                                                    | YGR038w                    | orf19.5751  |
| CA4530 | IME4         | -1.0 | 1.0  | 1.0  | 1.0 | positive transcription factor for IME2 (by homology)                                | YGL192w                    | orf19.1476  |
| CA1482 | IPF15575     | 1.0  | -1.0 | -1.0 | 1.0 | unknown function                                                                    |                            | orf19.8831  |
| CA2495 | CTA24        | -1.1 | -1.0 | -1.0 | 1.0 | transcriptional regulation (by homology)                                            |                            | orf19.4054  |
| CA2846 | PAD1         | 1.0  | -1.0 | -1.0 | 1.0 | phenylacrylic acid decarboxylase (by homology)                                      | YDR538w                    | orf19.5731  |
| CA4770 | IPF9382.3    | 1.0  | 1.1  | 1.0  | 1.0 | similar to Saccharomyces cerevisiae Dun1p protein kin                               | YDL101c                    | orf19.4002  |
| CA3585 | IFT1         | 1.1  | -1.0 | -1.2 | 1.0 | unknown function                                                                    |                            | orf19.2253  |
| CA4647 | IPF1493      | -1.0 | -1.0 | 1.0  | 1.0 | similarity to E.coli X-Pro aminopeptidase II (by homolog                            | YER078c                    | orf19.354   |
| CA5571 | IPF2001      | 1.0  | -1.0 | -1.1 | 1.0 | unknown function                                                                    |                            | orf19.7337  |
| CA5019 | IPF7557      | 1.0  | -1.0 | -1.0 | 1.0 | similar to Saccharomyces cerevisiae Smi1p involved in beta-1,3-glucan synthesis (by |                            | orf19.6972  |
| CA1952 | IFP1         | 1.0  | 1.0  | -1.1 | 1.0 | Unknown function                                                                    |                            | orf19.762   |
| CA0397 | FRE31        | 1.0  | -1.0 | -1.0 | 1.0 | Ferric reductase (by homology)                                                      | YNR060w                    | orf19.1930  |
| CA2455 | IPF12228     | -1.2 | 1.1  | -1.2 | 1.0 | unknown function                                                                    | YNL047c                    | orf19.3505  |
| CA1270 | IPF13504     | -1.0 | 1.0  | 1.1  | 1.0 | unknown function                                                                    |                            | orf19.10665 |
| CA5220 | MVP1.EXON2   | 1.1  | 1.0  | -1.0 | 1.0 | Required for vacuolar protein sorting, exon 2 (by homolo                            | YMR004w                    | orf19.7038  |
| CA0580 | PF3184.EXON2 | 1.1  | 1.0  | -1.1 | 1.0 | unknown function, exon 2                                                            | YGR165w                    | orf19.3559  |
| CA5761 | IFF11        | 1.1  | -1.0 | 1.0  | 1.0 | unknown function                                                                    |                            | orf19.5399  |
| CA5419 | PRS1         | -1.1 | -1.1 | 1.1  | 1.0 | Ribose-phosphate pyrophosphokinase                                                  | YKL181w                    | orf19.969   |
| CA2080 | IPF9693      | 1.0  | 1.1  | 1.1  | 1.0 | unknown function                                                                    | YDR482c                    | orf19.4875  |
| CA0486 | IPF15540     | 1.0  | -1.0 | -1.0 | 1.0 | unknown function                                                                    |                            | orf19.258   |
| CA1259 | IPF3174      | -1.1 | -1.0 | -1.0 | 1.0 | Farnesyl transferase (by homology)                                                  | YPL172c                    | orf19.10676 |
| CA4036 | IPF12042     | -1.1 | -1.1 | -1.1 | 1.0 | unknown function                                                                    | YGR093w                    | orf19.3666  |

|        |              |      |      |      |     |                                                                                               |                            |             |
|--------|--------------|------|------|------|-----|-----------------------------------------------------------------------------------------------|----------------------------|-------------|
| CA0113 | AUT2         | 1.0  | 1.1  | 1.1  | 1.0 | anchor protein mediating attachment of autophagosomes                                         | YNL223w                    | orf19.9938  |
| CA0522 | IPF4463      | 1.1  | 1.0  | 1.1  | 1.0 | unknown function                                                                              |                            | orf19.11013 |
| CA4019 | HOC1         | 1.0  | -1.0 | -1.0 | 1.0 | GLYCOSYLTRANSFERASE by homology                                                               | YJR075w                    | orf19.3445  |
| CA2201 | BOS1         | 1.0  | -1.0 | -1.0 | 1.0 | ER-to-Golgi v-SNARE (by homology)                                                             | YLR078c                    | orf19.2940  |
| CA2095 | IPF11492     | 1.0  | -1.0 | -1.0 | 1.0 | unknown function                                                                              |                            | orf19.2392  |
| CA1456 | PF11835.3E0C | 1.0  | 1.0  | -1.0 | 1.0 | unknown function                                                                              |                            |             |
| CA0130 | IPF4470      | 1.1  | 1.0  | 1.1  | 1.0 | unknown function                                                                              | YDR512c                    | orf19.3533  |
| CA3588 | SPE3         | 1.2  | 1.1  | 1.1  | 1.0 | putrescine aminopropyltransferase by homology                                                 | YPR069c                    | orf19.2250  |
| CA2569 | IPF12117     | 1.3  | -1.1 | -1.0 | 1.0 | unknown function                                                                              |                            | orf19.5648  |
| CA1610 | LAS1         | 1.0  | 1.1  | 1.1  | 1.0 | cell morphogenesis, cytoskeletal regulation and bud formation                                 | YKR063c                    | orf19.4120  |
| CA6104 | IPF65        | -1.0 | 1.0  | -1.0 | 1.0 | unknown function                                                                              |                            | orf19.5952  |
| CA4598 | IPF20019     | 1.0  | 1.1  | -1.0 | 1.0 | unknown function                                                                              | YNL310c                    | orf19.6917  |
| CA5181 | TIM12        | 1.0  | 1.0  | 1.0  | 1.0 | subunit of the TIM22-complex (by homology)                                                    | YBR091c                    | orf19.4620  |
| CA2654 | IPF8474      | 1.1  | 1.1  | 1.1  | 1.0 | unknown function                                                                              | YOR093c                    | orf19.5702  |
| CA2351 | IPF19947     | 1.1  | 1.0  | 1.2  | 1.0 | unknown function                                                                              | YBL014c                    | orf19.4420  |
| CA5487 | MET12        | -1.1 | 1.2  | 1.1  | 1.0 | methylenetetrahydrofolate reductase (by homology)                                             | YPL023c                    | orf19.5321  |
| CA0680 | IPF14511.5F  | -1.0 | 1.0  | -1.0 | 1.0 | unknown function, 5-prime end                                                                 | YMR313c                    | orf19.12169 |
| CA1461 | IPF6338      | 1.1  | 1.0  | 1.1  | 1.0 | unknown function                                                                              |                            | orf19.1109  |
| CA0571 | CDC43        | -1.0 | -1.1 | -1.0 | 1.0 | geranylgeranyltransferase I                                                                   | YGL155w                    | orf19.9369  |
| CA4969 | IPF3930      | 1.1  | -1.0 | 1.1  | 1.0 | unknown function                                                                              | YDL114w                    | orf19.6502  |
| CA0064 | IPF19308.3F  | 1.1  | -1.1 | -1.1 | 1.0 | unknown function, 3-prime end                                                                 | Missing in array           |             |
| CA4268 | IPF2287      | 1.0  | 1.0  | 1.1  | 1.0 | unknown function                                                                              | YOL008w                    | orf19.6662  |
| CA4850 | CIRT2        | -1.0 | 1.0  | 1.1  | 1.0 | Transposase                                                                                   |                            | orf19.3820  |
| CA3188 | IPF11610     | 1.0  | -1.0 | 1.1  | 1.0 | similar to <i>Saccharomyces cerevisiae</i> Hat2 subunit of the YEL056w                        |                            | orf19.2146  |
| CA5973 | IPF931       | 1.1  | 1.1  | 1.0  | 1.0 | unknown function                                                                              | YDR124w                    | orf19.7567  |
| CA3021 | IPF17640     | 1.0  | -1.0 | 1.1  | 1.0 | unknown function                                                                              |                            | orf19.3906  |
| CA1630 | RPP1         | 1.1  | -1.0 | -1.0 | 1.0 | required for processing of tRNA and 35S rRNA (by homology)                                    | YHR062c                    | orf19.1029  |
| CA3480 | IPF3224      | 1.1  | 1.0  | 1.0  | 1.0 | unknown function                                                                              |                            | orf19.3578  |
| CA2049 | IPF12982     | 1.1  | 1.0  | 1.0  | 1.0 | unknown function                                                                              |                            | orf19.13148 |
| CA4378 | IPF11299     | -1.0 | 1.1  | 1.1  | 1.0 | unknown function                                                                              | YCR030c                    | orf19.5671  |
| CA3861 | RIM8         | 1.0  | -1.0 | -1.0 | 1.0 | regulator of PH response                                                                      | YGL046w                    | orf19.6091  |
| CA5674 | IPF1274      | 1.0  | 1.0  | 1.1  | 1.0 | similar to <i>Saccharomyces cerevisiae</i> Ase1p component                                    | YOR058c                    | orf19.7377  |
| CA5225 | ACB1.EXON2   | 1.1  | -1.0 | 1.0  | 1.0 | acyl-coenzyme-A-binding protein, exon 2 (by homology)                                         | YGR037c                    |             |
| CA5163 | TFC1         | -1.0 | 1.0  | -1.0 | 1.0 | Transcription initiation factor TFIIIC 95 kD subunit (by homology)                            | YBR123c ; Missing in array | orf19.4601  |
| CA1928 | MRPL37       | 1.0  | 1.0  | 1.0  | 1.0 | Mitochondrial ribosomal protein YmL37 (by homology)                                           | YBR268w                    | orf19.755   |
| CA1932 | IPF3903      | 1.1  | 1.1  | 1.1  | 1.0 | unknown function                                                                              | YPL183wa                   | orf19.760   |
| CA1033 | MAD2         | -1.0 | -1.0 | -1.1 | 1.0 | spindle checkpoint complex subunit (by homology)                                              | YJL030w                    | orf19.8642  |
| CA0589 | IPF13080     | 1.0  | -1.0 | 1.0  | 1.0 | unknown function                                                                              |                            |             |
| CA3390 | CAF17        | 1.1  | -1.0 | -1.1 | 1.0 | Component of CCR4 transcriptional complex                                                     | YJR122w                    |             |
| CA3162 | HOL5.3F      | 1.0  | 1.0  | 1.0  | 1.0 | member of major facilitator superfamily multidrug-resistance protein subfamily 1, 3-prime end |                            | orf19.1583  |
| CA2746 | IPF19766     | -1.1 | -1.0 | 1.0  | 1.0 | unknown function                                                                              |                            | orf19.9646  |
| CA6047 | IPF4933      | 1.0  | -1.1 | -1.0 | 1.0 | unknown function                                                                              | YCR086w                    | orf19.7663  |
| CA2402 | IPF6437      | 1.0  | 1.0  | 1.0  | 1.0 | unknown function                                                                              |                            | orf19.3543  |
| CA0906 | IPF4406      | 1.0  | 1.0  | 1.0  | 1.0 | unknown function                                                                              | YKL137w                    | orf19.1483  |
| CA2409 | IPF19948     | 1.2  | -1.0 | -1.0 | 1.0 | unknown function                                                                              | YHR134w                    | orf19.291   |
| CA2799 | IPF19769     | -1.0 | -1.0 | -1.0 | 1.0 | unknown function                                                                              |                            | orf19.1718  |
| CA1940 | IPF7999      | 1.2  | 1.1  | 1.3  | 1.0 | unknown function                                                                              | YLR008c                    | orf19.4190  |
| CA2461 | MAK11        | -1.0 | -1.1 | -1.1 | 1.0 | involved in cell growth and replication                                                       | of M1 dsRI YKL021c         | orf19.1791  |
| CA1886 | RHO2.3F      | 1.0  | 1.0  | 1.1  | 1.0 | GTP-binding protein of the RHO subfamily, 3-prime end                                         |                            |             |

|         |            |      |      |      |     |                                                                     |                  |             |
|---------|------------|------|------|------|-----|---------------------------------------------------------------------|------------------|-------------|
| CA4465  | IPF9829    | 1.1  | 1.0  | 1.1  | 1.0 | unknown function                                                    | YHR197w          | orf19.6862  |
| CA3576  | IPF11107   | 1.0  | -1.0 | 1.0  | 1.0 | probably stearyl-CoA desaturase by homology to <i>S. cerevisiae</i> |                  | orf19.2264  |
| CA2857  | SSA1       | -1.4 | 1.0  | -1.1 | 1.0 | Heat shock protein of HSP70 family                                  |                  | orf19.1065  |
| CA3530  | IPF9926    | 1.0  | 1.0  | 1.2  | 1.0 | alkaline phosphatase (by homology)                                  |                  | orf19.984   |
| CA2168  | IPF4558    | 1.0  | 1.1  | -1.0 | 1.0 | similar to <i>Saccharomyces cerevisiae</i> Prp3p splicing fact      | YDR473c          | orf19.910   |
| CA1659  | IPF11054   | 1.0  | 1.0  | 1.1  | 1.0 | unknown function                                                    | YHR105w          | orf19.4323  |
| CA2395  | IPF6425    | 1.0  | -1.0 | -1.0 | 1.0 | unknown function                                                    | YOR320c          | orf19.3536  |
| CA5421  | SKN7       | 1.0  | 1.0  | 1.1  | 1.0 | Transcription factor (by homology)                                  | YHR206w          | orf19.971   |
| CA5314  | HAT2       | 1.0  | -1.0 | -1.0 | 1.0 | Subunit of the major yeast histone acetyltransferase (by homology)  |                  | orf19.7185  |
| CA1195  | KAR5       | -1.0 | -1.0 | -1.1 | 1.0 | nuclear fusion protein-like (by homology)                           | YMR065w          | orf19.7750  |
| CA4730  | IPF7737    | 1.0  | 1.0  | 1.1  | 1.0 | unknown function                                                    |                  | orf19.12320 |
| 13882.1 |            | 1.0  | -1.0 | -1.0 | 1.0 |                                                                     |                  |             |
| CA2527  | IPF4331    | -1.0 | 1.1  | -1.0 | 1.0 | unknown function                                                    | YMR285c          | orf19.5527  |
| CA1136  | IFN2       | 1.1  | -1.0 | 1.1  | 1.0 | glycerophosphoinositol transporter (by homology)                    |                  | orf19.1980  |
| CA0563  | MNN11      | -1.0 | -1.1 | -1.1 | 1.0 | Mannosyltransferase complex component (by homology)                 | YJL183w          | orf19.2927  |
| CA4653  | IPF3102    | 1.2  | 1.1  | 1.1  | 1.0 | similar to <i>Saccharomyces cerevisiae</i> Sec34p required for      | YER157w          | orf19.4440  |
| CA3972  | IPF6504    | 1.1  | 1.0  | -1.0 | 1.0 | unknown function                                                    | YDL099w          | orf19.9118  |
| CA3279  | IPF6268    | 1.1  | 1.0  | 1.0  | 1.0 | unknown function                                                    |                  | orf19.6313  |
| CA0239  | RPL9B      | 1.4  | -1.3 | 1.1  | 1.0 | RPL9B ribosomal protein L9 by homology                              | YNL067w          | orf19.236   |
| CA3859  | IPF4632    | -1.0 | 1.1  | 1.1  | 1.0 | similar to <i>Saccharomyces cerevisiae</i> Vps53p subunit of        | YJL029c          | orf19.6094  |
| CA4128  | IPF6876    | 1.0  | -1.0 | -1.0 | 1.0 | unknown function                                                    |                  | orf19.11725 |
| CA0372  | IPF10062   | 1.1  | 1.0  | -1.0 | 1.0 | unknown function                                                    | YNR051c          | orf19.1086  |
| CA1194  | MET222     | 1.0  | 1.0  | 1.1  | 1.0 | protein ser/thr phosphatase (by homology)                           |                  | orf19.7752  |
| CA3931  | IPF12719   | 1.0  | 1.1  | 1.0  | 1.0 | unknown function                                                    |                  | orf19.5103  |
| CA4388  | IPF12416.3 | 1.0  | 1.0  | 1.0  | 1.0 | cytidine deaminase, 3-prime end (by homology)                       | YLR245c          |             |
| CA3259  | IPF7970    | -1.0 | 1.1  | 1.0  | 1.0 | unknown function                                                    |                  | orf19.10206 |
| CA2943  | MAK31      | -1.0 | -1.1 | 1.0  | 1.0 | Involved in stability of L-A dsRNA-containing particles (t          | YCR020ca         |             |
| CA4472  | IPF6444    | 1.1  | -1.1 | -1.1 | 1.0 | putative methyltransferase (by homology)                            | YPL157w          | orf19.1900  |
| CA2329  | IPF4784    | -1.0 | 1.1  | 1.1  | 1.0 | unknown function                                                    |                  | orf19.4498  |
| CA0137  | SEC232     | -1.1 | 1.0  | 1.0  | 1.0 | Component of COPII coat (by homology)                               |                  | orf19.9206  |
| CA2670  | MAK16      | 1.0  | -1.1 | -1.0 | 1.0 | nuclear viral propagation protein (by homology)                     | YAL025c          | orf19.5500  |
| CA2232  | IPF10929   | 1.0  | -1.0 | -1.0 | 1.0 | unknown function                                                    |                  | orf19.3925  |
| CA3586  | IFT3       | 1.0  | 1.0  | 1.0  | 1.0 | Unknown function                                                    |                  | orf19.2252  |
| CA4156  | IPF10990   | -1.1 | -1.1 | -1.0 | 1.0 | unknown function                                                    | YOR006c          | orf19.5802  |
| CA5191  | IPF19538   | 1.0  | 1.0  | 1.0  | 1.0 | partially similar to Isocitrate dehydrogenase (NAD+) subunit 1      |                  |             |
| CA3711  | CHS3.3F    | 1.0  | 1.1  | 1.2  | 1.0 | chitin-UDP acetyl-glucosaminyl transferase 3, 5-prime e             | YBR023c          | orf19.4937  |
| CA0309  | IPF16935   | -1.0 | 1.0  | -1.0 | 1.0 | unknown function                                                    | YOL144w          | orf19.1091  |
| CA3592  | IPF12900   | 1.0  | 1.0  | 1.0  | 1.0 | unknown function                                                    | YPL199c          | orf19.2246  |
| CA5011  | IPF13944   | -1.0 | -1.1 | -1.0 | 1.0 | unknown function                                                    | Missing in array | orf19.5236  |
| CA1958  | IFE1       | 1.0  | 1.1  | -1.0 | 1.0 | Unknown function                                                    | YAL061w          | orf19.769   |
| CA5741  | IPF2891    | 1.1  | 1.1  | 1.0  | 1.0 | unknown function                                                    |                  |             |
| CA4246  | IPF4299    | -1.0 | 1.1  | 1.0  | 1.0 | unknown function                                                    |                  | orf19.535   |
| CA5677  | IPF1286    | 1.0  | 1.1  | 1.1  | 1.0 | unknown function                                                    |                  | orf19.7380  |
| CA2223  | PLB5       | -1.1 | 1.1  | 1.0  | 1.0 | putative phospholipase B precursor                                  |                  | orf19.12568 |
| CA3695  | IPF4872.5F | 1.0  | -1.0 | 1.1  | 1.0 | unknown function, 5-prime end                                       |                  | orf19.6270  |
| CA5746  | IPF2902    | 1.1  | 1.0  | 1.0  | 1.0 | unknown function                                                    |                  | orf19.7455  |
| CA1220  | IPF14985   | -1.0 | -1.1 | 1.0  | 1.0 | unknown function                                                    | YDR459c          | orf19.4134  |
| CA3780  | IPF11222   | -1.0 | 1.0  | -1.0 | 1.0 | unknown function                                                    |                  | orf19.5840  |
| CA5165  | ARL1       | -1.0 | -1.0 | -1.0 | 1.0 | GTP-binding protein of the ARF family (by homology)                 | YBR164c          | orf19.4603  |



|        |             |      |      |      |     |                                                                                          |         |             |
|--------|-------------|------|------|------|-----|------------------------------------------------------------------------------------------|---------|-------------|
| CA1163 | IPF15357    | -1.1 | 1.1  | 1.0  | 1.0 | unknown function                                                                         | YER169w | orf19.2730  |
| CA0760 | IPF11161.3  | 1.0  | 1.1  | -1.0 | 1.0 | unknown function, 3-prime end                                                            | YCR097w | orf19.3201  |
| CA2040 | IPF12946    | 1.1  | -1.0 | 1.2  | 1.0 | unknown function                                                                         | YDL199c | orf19.4356  |
| CA0723 | PRI2        | -1.1 | -1.1 | -1.0 | 1.0 | DNA-directed DNA polymerase alpha , 58 KD subunit (L                                     | YKL045w | orf19.2885  |
| CA4997 | IPF2027     | 1.0  | -1.1 | -1.1 | 1.0 | unknown function                                                                         |         | orf19.5250  |
| CA4984 | IPF2052     | 1.2  | 1.0  | 1.3  | 1.0 | unknown function                                                                         |         | orf19.5266  |
| CA3024 | IPF11506    | 1.0  | 1.1  | 1.1  | 1.0 | unknown function                                                                         |         | orf19.3903  |
| CA2017 | IPF3414     | -1.2 | 1.0  | -1.1 | 1.0 | putative serine/threonine protein kinase                                                 | YKL171w | orf19.846   |
| CA2270 | VMA4        | 1.0  | -1.2 | -1.1 | 1.0 | H <sup>+</sup> -transporting ATPase E chain                                              | YOR332w | orf19.2598  |
| CA0820 | IPF12138    | -1.0 | -1.2 | -1.0 | 1.0 | unknown function                                                                         | YBR022w | orf19.1950  |
| CA1060 | IPF11460    | 1.0  | 1.1  | -1.1 | 1.0 | unknown function                                                                         | YJL076w | orf19.267   |
| CA4779 | IPF3351     | 1.0  | 1.2  | 1.1  | 1.0 | unknown function                                                                         | YHR071w | orf19.4012  |
| CA0595 | IPF8856     | 1.0  | 1.0  | 1.0  | 1.0 | unknown function                                                                         |         | orf19.12367 |
| CA3292 | IPF5729     | -1.0 | -1.0 | -1.0 | 1.0 | unknown function                                                                         |         | orf19.6326  |
| CA5636 | IPF473      | 1.0  | -1.0 | -1.0 | 1.0 | unknown Function                                                                         | YOR166c | orf19.7059  |
| CA2695 | IPF9070     | 1.0  | -1.0 | 1.0  | 1.0 | similar to <i>Saccharomyces cerevisiae</i> Sen2p tRNA splici                             | YLR105c | orf19.2735  |
| CA4747 | IPF4484     | 1.0  | -1.0 | -1.0 | 1.0 | unknown function                                                                         |         | orf19.4834  |
| CA4623 | CTA9        | 1.0  | 1.1  | 1.0  | 1.0 | Putative transcriptional regulator                                                       |         | orf19.3315  |
| CA5794 | IPF4191     | -1.0 | -1.1 | 1.2  | 1.0 | unknown function                                                                         | YBL098w | orf19.5443  |
| CA1690 | FAT1        | -1.1 | -1.0 | -1.1 | 1.0 | very long-chain fatty acyl-CoA synthetase (by homology                                   | YBR041w | orf19.3653  |
| CA0876 | VMA6        | 1.1  | 1.0  | -1.0 | 1.0 | H <sup>+</sup> -ATPase V0 domain 36 KD subunit,vacuolar (by hom                          | YLR447c | orf19.7996  |
| CA0691 | CIRT4A      | -1.2 | -1.1 | 1.0  | 1.0 | Transposase (by homology)                                                                |         | orf19.10357 |
| CA5376 | GDI1        | 1.1  | 1.0  | 1.0  | 1.0 | GDP dissociation inhibitor by homology                                                   | YER136w | orf19.7261  |
| CA5882 | RRP1        | -1.0 | -1.1 | -1.1 | 1.0 | Involved in processing rRNA precursor species to matu                                    | YDR087c | orf19.6828  |
| CA3751 | IPF7378     | -1.0 | -1.0 | -1.0 | 1.0 | unknown function                                                                         |         | orf19.3427  |
| CA2557 | IPF12101    | -1.0 | -1.0 | 1.0  | 1.0 | mycelial surface antigen precursor (by homology to <i>Candida</i> gene CSA1)             |         | orf19.5635  |
| CA0437 | DIT1        | 1.1  | 1.0  | 1.1  | 1.0 | Spore wall maturation protein (by homology)                                              | YDR403w | orf19.9308  |
| CA0339 | IPF13247    | -1.0 | -1.1 | 1.0  | 1.0 | unknown function                                                                         |         | orf19.3376  |
| CA3959 | IPF11236.3F | -1.1 | -1.0 | -1.1 | 1.0 | similar to <i>Saccharomyces cerevisiae</i> Sec15p component of the exocyst complex, 3-pr |         | orf19.1418  |
| CA1307 | IPF13506.3  | -1.0 | -1.0 | -1.0 | 1.0 | unknown function, 3-prime end                                                            |         |             |
| CA4228 | IPF16057    | 1.1  | 1.0  | 1.0  | 1.0 | unknown function                                                                         | YHL025w | orf19.831   |
| CA3826 | IPF20148    | 1.0  | 1.1  | 1.0  | 1.0 | unknown function                                                                         |         | orf19.5762  |
| CA3114 | IPF18384    | 1.1  | 1.0  | -1.0 | 1.0 | unknown function                                                                         |         |             |
| CA4788 | SDH42       | 1.0  | -1.0 | 1.0  | 1.0 | succinate dehydrogenase membrane anchor subunit for sdh2p (by homology)                  |         | orf19.4022  |
| CA5999 | IPF668      | 1.0  | -1.0 | 1.0  | 1.0 | unknown function                                                                         | YDR398w | orf19.7599  |
| CA4397 | IPF14369    | -1.0 | 1.0  | 1.1  | 1.0 | unknown function                                                                         | YLR165c | orf19.3114  |
| CA0426 | CFT1        | -1.1 | -1.0 | -1.0 | 1.0 | pre-mRNA 3'-end processing factor CF II (by homology)                                    | YDR301w | orf19.2760  |
| CA1594 | IPF11051    | -1.0 | -1.0 | 1.1  | 1.0 | unknown function                                                                         |         | orf19.4321  |
| CA0424 | IPF10795    | 1.0  | 1.1  | 1.2  | 1.0 | putative transcription factor (by homology)                                              |         | orf19.2356  |
| CA5523 | NIT2        | 1.1  | -1.0 | -1.0 | 1.0 | Nitrilase (by homology)                                                                  | YJL126w | orf19.7279  |
| CA2005 | IPF11802    | 1.0  | -1.0 | 1.0  | 1.0 | unknown function                                                                         |         | orf19.2797  |
| CA5141 | CYT2        | 1.0  | 1.1  | 1.0  | 1.0 | holocytochrome-c1 synthase (by homology)                                                 | YKL087c | orf19.4578  |
| CA2774 | TFC4        | 1.0  | 1.0  | 1.1  | 1.0 | transcription factor IIIC chain TFC4- like by homology                                   | YGR047c | orf19.274   |
| CA4095 | IPF4002     | -1.0 | -1.0 | 1.0  | 1.0 | unknown function                                                                         |         | orf19.660   |
| CA1173 | IPF14254    | -1.0 | -1.1 | -1.1 | 1.0 | unknown function                                                                         |         | orf19.4768  |
| CA0652 | SHP1        | -1.1 | -1.1 | -1.2 | 1.0 | potential regulatory subunit for Glc7p (by homology)                                     | YBL058w | orf19.10082 |
| CA2737 | IPF15423    | -1.1 | -1.0 | -1.1 | 1.0 | putative superoxide dismutase (by homology)                                              |         | orf19.2108  |
| CA4591 | IPF2216     | -1.0 | -1.0 | -1.0 | 1.0 | putative foflylpolyglutamate synthetase (by homology)                                    | YMR113w | orf19.6908  |
| CA0925 | IPF17050    | 1.0  | 1.1  | -1.0 | 1.0 | unknown function                                                                         |         | orf19.1049  |

|            |              |      |      |      |     |                                                                 |                            |             |
|------------|--------------|------|------|------|-----|-----------------------------------------------------------------|----------------------------|-------------|
| CA1831     | CHS1         | 1.0  | 1.0  | 1.2  | 1.0 | Chitin synthase (by homology)                                   | YBR038w ; Missing in array | orf19.5188  |
| CA1906     | IPF7271      | -1.0 | -1.0 | 1.1  | 1.0 | unknown function                                                |                            | orf19.2784  |
| CA3493     | CDC7         | -1.1 | 1.1  | 1.0  | 1.0 | serine/threonine protein kinase (by homology)                   | YDL017w                    | orf19.3561  |
| CA5513     | RPC11        | 1.1  | 1.1  | 1.0  | 1.0 | RNA polymerase III C11 subunit (by homology)                    | YDR045c                    | orf19.5360  |
| CA4066     | IPF5925      | 1.0  | 1.1  | 1.0  | 1.0 | RNA-binding protein (by homology)                               |                            | orf19.444   |
| CA2982     | CSE1.3F      | 1.0  | -1.0 | 1.1  | 1.0 | Importin-beta-like protein, 3-prime end (by homology)           |                            | orf19.8815  |
| CA4680     | AMD1         | -1.3 | 1.1  | -1.1 | 1.0 | AMP deaminase (by homology)                                     | YML035c                    | orf19.891   |
| CA2446     | IPF2582      | -1.0 | 1.0  | 1.0  | 1.0 | unknown function                                                | YKL098w ; Missing in array | orf19.5504  |
| CA3019     | IPF15494     | -1.0 | -1.0 | -1.0 | 1.0 | putative ribonuclease (by homology)                             |                            | orf19.3910  |
| CA4049     | PF10482.EXON | 1.1  | -1.0 | -1.1 | 1.0 | unknown function, exon 1                                        |                            | orf19.8054  |
| CA0904     | IPF4403      | -1.1 | -1.0 | 1.0  | 1.0 | unknown function                                                |                            | orf19.1481  |
| CA2295     | HOS2         | -1.1 | 1.0  | -1.0 | 1.0 | putative histone deacetylase (by homology)                      | YGL194c                    | orf19.5377  |
| CA3471     | IPF6308      | -1.0 | 1.0  | -1.0 | 1.0 | unknown function                                                |                            | orf19.1667  |
| CA0248     | IPF7262      | 1.0  | 1.0  | -1.0 | 1.0 | unknown function                                                |                            | orf19.2789  |
| CA0452     | IPF13554     | 1.1  | 1.0  | 1.0  | 1.0 | Hypothetical acidic protein                                     |                            | orf19.8881  |
| CA0338     | IPF13252     | -1.0 | 1.0  | 1.0  | 1.0 | unknown function                                                |                            | orf19.3378  |
| CA1785     | IPF7631      | 1.1  | 1.0  | 1.0  | 1.0 | unknown function                                                | YPR061c                    | orf19.1169  |
| CA2705     | NEM1         | 1.1  | -1.1 | -1.0 | 1.0 | required for nuclear morphology (by homology)                   | YHR004c                    | orf19.4657  |
| CA4695     | IPF4229      | -1.1 | -1.0 | 1.1  | 1.0 | unknown function                                                | YML015c                    | orf19.6923  |
| CA0220     | ABZ1         | 1.0  | -1.1 | -1.0 | 1.0 | para-aminobenzoate synthase (by homology)                       | YNR033w                    | orf19.1291  |
| CA5504     | TAF65        | 1.0  | 1.0  | 1.0  | 1.0 | subunit of transcription factor TFIID (by homology)             | YML114c                    | orf19.5346  |
| CA1916     | IPF16566.3   | 1.1  | 1.0  | 1.0  | 1.0 | unknown function, 3-prime end                                   | YHR001wa                   |             |
| CA0330     | BAT21        | -1.1 | -1.1 | 1.1  | 1.0 | branched-chain amino acid transaminase (by homology)            | YJR148w                    | orf19.797   |
| CA5979     | IPF921       | -1.0 | -1.1 | -1.0 | 1.0 | BTB domain and Ankaryin repeat containing protein (by homology) |                            | orf19.7574  |
| CA5441     | IPF227       | 1.0  | -1.1 | -1.2 | 1.0 | unknown function                                                | YHR116w                    | orf19.3244  |
| CA2045     | IPF8107      | 1.1  | -1.0 | -1.0 | 1.0 | unknown function                                                | YFL044c                    | orf19.10450 |
| CA1327     | IPF6680      | 1.0  | -1.1 | 1.0  | 1.0 | unknown function                                                | YHR070w                    | orf19.1305  |
| CA5260     | RAD54        | -1.0 | 1.1  | 1.0  | 1.0 | DNA-dependent ATPase of the Snf2p family (by homology)          | YGL163c                    | orf19.5004  |
| CA0770     | IPF10963     | -1.2 | -1.0 | -1.2 | 1.0 | similar to <i>Saccharomyces cerevisiae</i> Tid3p interacting    | YIL144w                    | orf19.10345 |
| CA1323     | IPF6675      | 1.0  | 1.0  | 1.1  | 1.0 | unknown function                                                |                            | orf19.1309  |
| CA4548     | IPF7862      | 1.0  | 1.0  | 1.1  | 1.0 | unknown function                                                |                            | orf19.1450  |
| CA4910     | IPF1437      | 1.0  | -1.0 | 1.1  | 1.0 | unknown function                                                |                            | orf19.6048  |
| CA0103     | IPF17515     | -1.1 | 1.1  | 1.5  | 1.0 | unknown function                                                |                            | orf19.749   |
| CA2422     | IPF14997     | -1.0 | -1.0 | -1.1 | 1.0 | unknown function                                                |                            | orf19.11950 |
| CA0295     | IPF15033     | 1.0  | 1.0  | 1.1  | 1.0 | unknown function                                                | YDL091c                    | orf19.1595  |
| CA2428     | IPF9894.3    | -1.0 | 1.0  | 1.1  | 1.0 | unknown function, 3-prime end                                   |                            | orf19.3405  |
| CA1454     | ALG1         | -1.0 | -1.1 | -1.1 | 1.0 | beta-1,4-mannosyltransferase (by homology)                      | YBR110w                    | orf19.4410  |
| CA1274     | SAS10        | -1.0 | -1.0 | -1.0 | 1.0 | Involved in silencing (by homology)                             | YDL153c                    | orf19.2717  |
| CA3958     | COX11        | 1.1  | 1.1  | 1.3  | 1.0 | cytochrome-c oxidase assembly protein by homology to            | YPL132w                    | orf19.1416  |
| CA6018     | IPF627       | 1.1  | 1.0  | -1.0 | 1.0 | unknown function                                                | YOR148c                    | orf19.7620  |
| CA3540     | PTC5         | -1.2 | -1.0 | -1.0 | 1.0 | Type 2C Protein Phosphatase by homology                         | YOR090c                    | orf19.6376  |
| CA1141     | IPF17322.5F  | 1.1  | -1.0 | -1.0 | 1.0 | unknown function, 5-prime end                                   |                            | orf19.4069  |
| CA0315     | ALS9.5EOC    | -1.0 | -1.0 | 1.0  | 1.0 | agglutinin-like protein, 5-prime end                            | Missing in array           | orf19.5742  |
| CA2665     | CDC21        | 1.0  | -1.1 | 1.0  | 1.0 | thymidylate synthase (by homology)                              | YOR074c                    | orf19.3549  |
| HumanActin |              | 1.0  | 1.0  | 1.1  | 1.0 |                                                                 |                            |             |
| CA3622     | IPF12022     | -1.0 | 1.0  | 1.1  | 1.0 | extracellular alpha-1,4-glucan glucosidase (by homology)        |                            | orf19.7836  |
| CA2136     | VPS33        | 1.0  | -1.0 | -1.0 | 1.0 | VACUOLAR PROTEIN SORTING (by homology)                          | YLR396c                    | orf19.5214  |
| CA2516     | IPF4301      | 1.0  | 1.0  | 1.1  | 1.0 | unknown function                                                | YAL032c                    | orf19.5513  |
| CA5212     | IPF3050      | 1.1  | 1.0  | 1.0  | 1.0 | unknown function                                                | YDL238c                    | orf19.7029  |

|        |           |      |      |      |     |                                                                |                            |             |
|--------|-----------|------|------|------|-----|----------------------------------------------------------------|----------------------------|-------------|
| CA3833 | IPF8192   | 1.0  | 1.0  | 1.2  | 1.0 | unknown function                                               |                            | orf19.6592  |
| CA6006 | IPF652    | 1.0  | -1.0 | 1.0  | 1.0 | unknown function                                               |                            | orf19.7606  |
| CA0078 | CTA27     | -1.0 | 1.0  | -1.1 | 1.0 | transcriptional activation                                     |                            |             |
| CA5643 | IPF448    | 1.0  | -1.0 | -1.0 | 1.0 | unknown function                                               | YOR111w                    | orf19.7051  |
| CA6039 | CKA1      | -1.1 | 1.0  | -1.0 | 1.0 | casein kinase II, catalytic alpha chain (by homology)          | YIL035c                    | orf19.7652  |
| CA2397 | CFL12     | 1.0  | 1.1  | -1.0 | 1.0 | Strong similarity to ferric reductase Fre2p (by homology)      |                            | orf19.3538  |
| CA1641 | NHP10.3F  | 1.1  | 1.0  | -1.0 | 1.0 | unknown function, 3-prime end                                  | YDL002c                    | orf19.1731  |
| CA1038 | IPF6159   | -1.1 | -1.1 | -1.1 | 1.0 | unknown function                                               | YML076c                    | orf19.8637  |
| CA1114 | IPF9995   | 1.0  | 1.1  | 1.2  | 1.0 | unknown function                                               | YJR070c                    | orf19.2286  |
| CA0111 | IPF16830  | -1.0 | 1.0  | 1.0  | 1.0 | similar to <i>Saccharomyces cerevisiae</i> Spo1p transcriptio  | YNL012w                    | orf19.4151  |
| CA3558 | IPF7760   | 1.0  | -1.0 | -1.0 | 1.0 | unknown function                                               |                            | orf19.3887  |
| CA5901 | IPF2374   | 1.0  | 1.0  | -1.0 | 1.0 | unknown function                                               | YDR089w                    | orf19.6805  |
| CA0463 | IPF18979  | 1.0  | 1.1  | 1.0  | 1.0 | unknown function                                               |                            | orf19.7797  |
| CA4644 | IPF1497   | -1.0 | 1.0  | -1.0 | 1.0 | unknown function                                               | YPR153w                    | orf19.351   |
| CA1612 | IFJ6      | 1.1  | 1.0  | 1.1  | 1.0 | unknown function                                               |                            | orf19.3214  |
| CA1159 | IPF13423  | 1.0  | 1.0  | -1.0 | 1.0 | unknown function                                               |                            | orf19.4128  |
| CA0096 | IPF13409  | -1.0 | 1.0  | 1.0  | 1.0 | unknown function                                               | YJL149w                    | orf19.751   |
| CA6017 | IPF629    | -1.1 | -1.1 | -1.1 | 1.0 | unknown function                                               |                            | orf19.7619  |
| CA5762 | IPF1084.3 | 1.1  | 1.1  | 1.1  | 1.0 | unknown function, 3-prime end                                  |                            | orf19.5401  |
| CA3340 | ADA2      | -1.1 | -1.0 | -1.1 | 1.0 | general transcriptional adaptor or co-activator (by homo       | YDR448w                    | orf19.2331  |
| CA2849 | POP2      | -1.0 | 1.0  | 1.0  | 1.0 | required for glucose derepression (by homology)                | YNR052c                    | orf19.5734  |
| CA3138 | SAP2      | 1.0  | 1.0  | 1.0  | 1.0 | aspartic protease                                              |                            | orf19.3708  |
| CA4462 | IPF17251  | 1.0  | -1.0 | 1.1  | 1.0 | unknown function                                               |                            | orf19.6859  |
| CA4080 | IPF2524   | -1.0 | -1.0 | 1.1  | 1.0 | unknown function                                               | YPR084w                    | orf19.6636  |
| CA2224 | UGA6.3EOC | 1.0  | 1.0  | 1.2  | 1.0 | GABA-specific transport protein, 3-prime end                   |                            |             |
| CA2370 | APN2      | -1.0 | -1.0 | -1.1 | 1.0 | AP endonuclease, exonuclease III homologue (by homc            | YBL019w                    | orf19.1836  |
| CA2392 | IPF15672  | -1.0 | 1.0  | 1.1  | 1.0 | unknown function                                               |                            | orf19.10138 |
| CA3612 | IPF3852   | 1.1  | 1.0  | -1.0 | 1.0 | unknown function                                               | YJR046w                    | orf19.29    |
| CA5368 | IPF5257   | 1.0  | -1.1 | -1.0 | 1.0 | unknown function                                               |                            | orf19.7250  |
| CA1920 | IPF7476   | -1.2 | -1.2 | 1.1  | 1.0 | similar to <i>Saccharomyces cerevisiae</i> Rgd1p putative      | GTYBR260c                  | orf19.2443  |
| CA3207 | IPF3456   | -1.0 | 1.0  | 1.1  | 1.0 | unknown function                                               | YHR198c                    | orf19.6189  |
| CA3351 | IPF18347  | 1.0  | 1.0  | -1.0 | 1.0 | unknown function                                               |                            | orf19.9503  |
| CA0735 | IPF8995   | 1.1  | -1.1 | 1.1  | 1.0 | unknown function                                               | YMR226c                    | orf19.4633  |
| CA4600 | IPF2199   | 1.1  | 1.0  | 1.0  | 1.0 | unknown function                                               |                            | orf19.6919  |
| CA5128 | IPF5118   | -1.0 | 1.0  | -1.0 | 1.0 | unknown function                                               | YOL032w                    | orf19.13758 |
| CA3791 | IPF11212  | 1.0  | 1.0  | 1.0  | 1.0 | similar to <i>Saccharomyces cerevisiae</i> Bub2 cell cycle arr | YMR055c                    | orf19.5827  |
| CA4888 | IPF1631   | 1.1  | 1.0  | -1.1 | 1.0 | unknown function                                               |                            | orf19.6580  |
| CA5297 | YAR1      | 1.1  | 1.1  | -1.2 | 1.0 | Ankyrin repeat-containing protein (by homology)                | YPL239w                    | orf19.7160  |
| COX3a  |           | -1.1 | -1.1 | -1.1 | 1.0 |                                                                |                            |             |
| CA3653 | IPF7451   | 1.0  | 1.0  | 1.0  | 1.0 | unknown function                                               |                            | orf19.2044  |
| CA4720 | ECM18     | 1.0  | 1.2  | 1.0  | 1.0 | Involved in cell wall biogenesis and architecture (by hor      | YDR125c                    | orf19.6958  |
| CA1826 | UAP1      | -1.2 | -1.0 | -1.1 | 1.0 | UDP-N-acetylglucosamine pyrophosphorylase                      | YDL103c ; Missing in array | orf19.4265  |
| CA4480 | IPF6464   | 1.0  | 1.1  | 1.1  | 1.0 | putative triacylglycerol lipase (by homology)                  | YLL012w                    | orf19.1887  |
| CA1443 | IPF4776   | -1.1 | -1.2 | -1.1 | 1.0 | unknown Function                                               | YKL172w                    | orf19.4492  |
| CA5117 | IPF1323   | -1.1 | 1.0  | -1.0 | 1.0 | unknown function                                               |                            | orf19.6414  |
| CA3380 | MSL5      | 1.0  | -1.0 | 1.0  | 1.0 | branch point bridging protein (by homology)                    | YLR116w                    | orf19.329   |
| CA5055 | IPF3701   | 1.0  | 1.0  | 1.0  | 1.0 | unknown function                                               | YMR114c                    | orf19.3021  |
| CA5472 | IPF16948  | -1.0 | 1.1  | -1.0 | 1.0 | unknown function                                               |                            | orf19.3285  |
| CA5045 | IPF4510   | -1.0 | 1.0  | 1.1  | 1.0 | unknown function                                               |                            | orf19.6999  |

|        |              |      |      |      |     |                                                                     |                  |             |
|--------|--------------|------|------|------|-----|---------------------------------------------------------------------|------------------|-------------|
| CA1939 | IPF8000      | 1.0  | 1.0  | 1.1  | 1.0 | unknown function                                                    |                  | orf19.4189  |
| CA4848 | RTS2         | 1.1  | 1.1  | 1.1  | 1.0 | Unknown function                                                    | YOR077w          | orf19.3817  |
| CA0014 | IPF13368     | 1.0  | -1.0 | 1.0  | 1.0 | unknown function                                                    |                  | orf19.11034 |
| CA1334 | IPF19912     | 1.0  | 1.1  | -1.0 | 1.0 | unknown function                                                    |                  | orf19.8740  |
| CA3255 | IPF4729      | 1.1  | 1.0  | -1.0 | 1.0 | unknown Function                                                    |                  | orf19.3743  |
| CA5118 | IPF1321      | 1.0  | -1.1 | 1.0  | 1.0 | unknown function                                                    |                  | orf19.6413  |
| CA0405 | IPF19862.3F  | -1.0 | -1.0 | 1.0  | 1.0 | unknown function, 3-prime end                                       |                  | orf19.12993 |
| CA3373 | SEO1         | 1.1  | 1.0  | -1.0 | 1.0 | suppressor of sulfoxyde ethionine resistance (by homology)          |                  | orf19.1855  |
| CA2917 | IPF16173.5F  | 1.0  | 1.0  | 1.1  | 1.0 | Unknown function, 5-prime end                                       |                  | orf19.4509  |
| CA6161 | IPF1834      | 1.0  | -1.1 | -1.0 | 1.0 | probable syntaxin (by homology)                                     | YOR036w          | orf19.5875  |
| CA0217 | MNN4         | 1.1  | -1.0 | 1.1  | 1.0 | regulates the mannosylphosphorylation (by homology)                 | YKL201c          | orf19.849   |
| CA5093 | IPF1390      | 1.0  | 1.1  | 1.0  | 1.0 | unknown function                                                    |                  | orf19.6449  |
| COX1   |              | -1.1 | 1.0  | -1.1 | 1.0 |                                                                     |                  |             |
| CA5470 | IPF300       | -1.0 | -1.0 | -1.0 | 1.0 | unknown function                                                    |                  | orf19.3282  |
| CA3396 | IPF13617     | 1.1  | -1.0 | 1.1  | 1.0 | unknown function                                                    |                  | orf19.3971  |
| CA2918 | IPF16173.3F  | -1.0 | -1.0 | 1.1  | 1.0 | unknown function, 3-prime end                                       |                  | orf19.4508  |
| CA0897 | IPF4902      | -1.1 | 1.0  | -1.0 | 1.0 | unknown function                                                    |                  | orf19.8043  |
| CA4139 | THR4         | -1.1 | -1.1 | -1.1 | 1.0 | threonine synthase (by homology)                                    | YCR053w          | orf19.4233  |
| CA1058 | DOT6         | 1.1  | -1.1 | -1.0 | 1.0 | involved in derepression of telomeric                               | silencir YER088c | orf19.2545  |
| CA0968 | SAP6         | -1.0 | 1.0  | -1.0 | 1.0 | secreted aspartyl protease                                          |                  | orf19.12988 |
| CA3317 | URM1         | 1.0  | 1.1  | 1.0  | 1.0 | ubiquitin like protein (by homology)                                | YIL008w          | orf19.2299  |
| CA1135 | IMP2         | -1.0 | 1.0  | -1.0 | 1.0 | mitochondrial inner membrane protease subunit (by hor               | YMR035w          | orf19.1981  |
| Int 1  |              | 1.0  | 1.0  | 1.0  | 1.0 |                                                                     |                  |             |
| CA2267 | IFU1.5F      | -1.1 | -1.1 | -1.1 | 1.0 | Unknown function, 5-prime end                                       | YNL126w          | orf19.2600  |
| Lux A  |              | 1.0  | 1.0  | 1.0  | 1.0 |                                                                     |                  |             |
| CA2069 | FUR1         | 1.0  | 1.1  | 1.1  | 1.0 | Uracil phosphoribosyltransferase (by homology)                      | YHR128w          | orf19.2640  |
| CA2894 | IFS2         | -1.1 | -1.0 | -1.0 | 1.0 | Unknown function                                                    |                  | orf19.2462  |
| CA4552 | IPF7869      | 1.0  | -1.0 | -1.0 | 1.0 | unknown function                                                    |                  | orf19.1447  |
| CA1726 | IPF13021     | -1.1 | -1.0 | -1.0 | 1.0 | unknown function                                                    |                  | orf19.2647  |
| CA2321 | MEC3         | -1.0 | 1.0  | -1.0 | 1.0 | G2-specific checkpoint protein (by homology)                        | YLR288c          | orf19.5485  |
| CA3465 | MRP1.3F      | -1.0 | -1.1 | -1.1 | 1.0 | Mitochondrial ribosomal protein of the small subunit, 3- $\epsilon$ | YDR347w          |             |
| CA4383 | IPF8573      | -1.1 | 1.0  | 1.1  | 1.0 | unknown function                                                    | YLR427w          | orf19.13121 |
| Int 4  |              | 1.0  | 1.0  | 1.0  | 1.0 |                                                                     |                  |             |
| CA0390 | DCG1         | -1.0 | -1.0 | -1.1 | 1.0 | involved in nitrogen-catabolite metabolism (by hc                   | YIR030c          | orf19.244   |
| CA2791 | IMP4         | 1.0  | 1.0  | 1.0  | 1.0 | Ribonucleoprotein (by homology)                                     | YNL075w          | orf19.603   |
| CA2129 | IPF4899      | -1.0 | -1.1 | -1.1 | 1.0 | unknown function                                                    | YKL155c          | orf19.414   |
| CA4100 | IPF3985      | -1.0 | 1.0  | -1.1 | 1.0 | unknown function                                                    | YDR499w          | orf19.666   |
| CA4503 | SRV2         | -1.0 | -1.0 | 1.0  | 1.0 | adenylate cyclase-associated protein homolog                        | YNL138w          | orf19.505   |
| CA1689 | IPF13030     | -1.1 | 1.0  | -1.0 | 1.0 | unknown function                                                    |                  | orf19.3655  |
| CA0937 | IPF19892     | 1.1  | 1.1  | 1.0  | 1.0 | unknown function                                                    |                  | orf19.8683  |
| CA2101 | IPF9364      | -1.0 | -1.1 | -1.1 | 1.0 | unknown function                                                    | YMR097c          | orf19.2384  |
| CA1692 | PF17055.3EOC | 1.1  | 1.0  | 1.0  | 1.0 | unknown function, 3-prime end                                       | YDR425w          | orf19.5036  |
| CA2929 | IPF7838      | 1.0  | 1.0  | 1.1  | 1.0 | similar to <i>Saccharomyces cerevisiae</i> Mus81p involved in       | YDR386w          | orf19.4206  |
| CA2783 | IPF3808      | -1.0 | -1.0 | -1.0 | 1.0 | unknown function                                                    | YLL042c          | orf19.286   |
| CA0874 | CPA1         | -1.0 | 1.1  | 1.0  | 1.0 | Arginine-specific carbamoylphosphate synthase, small $\epsilon$     | YOR303w          | orf19.12100 |
| CA1739 | IPF4976      | 1.1  | 1.0  | 1.1  | 1.0 | unknown function                                                    |                  | orf19.10057 |
| CA1453 | HOS1         | -1.1 | -1.1 | -1.0 | 1.0 | Putative histon deacetylase (by homology)                           | YPR068c          | orf19.4411  |
| CA2915 | IFA17.3F     | -1.0 | 1.0  | 1.1  | 1.0 | unknown function, 3-prime end                                       |                  | orf19.4511  |
| NAD5   |              | -1.0 | -1.0 | -1.1 | 1.0 |                                                                     |                  |             |

|        |            |      |      |      |      |                                                                 |                            |             |
|--------|------------|------|------|------|------|-----------------------------------------------------------------|----------------------------|-------------|
| CA4733 | IPF7732    | -1.0 | -1.0 | -1.0 | 1.0  | similar to <i>Saccharomyces cerevisiae</i> Hcm1p transcriptic   | YCR065w                    | orf19.4853  |
| CA4376 | IPF11307   | -1.0 | 1.0  | 1.1  | 1.0  | unknown function                                                | YKL064w                    | orf19.5667  |
| CA5380 | IPF5224    | 1.1  | 1.1  | 1.1  | 1.0  | unknown function                                                |                            | orf19.7267  |
| CA2747 | IPF11467   | -1.0 | 1.0  | 1.0  | 1.0  | unknown function                                                | YNL260c                    | orf19.2367  |
| CA2815 | IPF5604    | -1.0 | 1.0  | -1.0 | 1.0  | unknown function                                                | YLR436c                    | orf19.2996  |
| CA3811 | PET112     | -1.0 | -1.0 | -1.1 | 1.0  | glutamyl-tRNA (GLN) amidotransferase subunit B (by ho           | YBL080c                    | orf19.2494  |
| CA0911 | IPF14814   | 1.0  | -1.0 | 1.0  | 1.0  | unknown function                                                | YJR097w                    | orf19.9568  |
| CA1908 | APL3       | -1.2 | -1.1 | -1.1 | 1.0  | AP-2 complex subunit, alpha-adaptin (by homology)               | YBL037w                    | orf19.2786  |
| CA4368 | PEX10.3    | 1.1  | -1.0 | -1.1 | 1.0  | peroxisomal assembly protein, 3-prime end (by homolo            | YDR265w                    | orf19.5660  |
| CA1949 | IPF14021   | 1.0  | 1.0  | -1.0 | 1.0  | dual specificity phosphatase (PTP/DSP) (by homology)            | YJR110w                    | orf19.12206 |
| CA2686 | HST2       | -1.1 | 1.0  | -1.1 | 1.0  | Transcription regulatory protein                                | YPL015c                    | orf19.2580  |
| CA2236 | IFA23      | -1.1 | -1.0 | -1.1 | 1.0  | unknown function                                                |                            | orf19.3919  |
| CA6058 | ATP16      | 1.0  | -1.0 | 1.0  | -1.0 | F1F0-ATPase complex, F1 delta subunit                           | YDL004w                    | orf19.7678  |
| CA3935 | IPF14688   | -1.2 | -1.0 | 1.1  | -1.0 | unknown function                                                | YDR027c                    | orf19.2007  |
| CA0493 | PRP39.3    | 1.0  | -1.0 | 1.1  | -1.0 | pre-mRNA splicing factor, 3-prime end (by homology)             | YML046w                    | orf19.1492  |
| CA0206 | IPF14089   | -1.1 | 1.0  | -1.1 | -1.0 | putative serine/threonine protein kinase                        |                            | orf19.10297 |
| CA4948 | IPF5149    | 1.0  | -1.1 | 1.0  | -1.0 | unknown function                                                | Missing in array           | orf19.6530  |
| CA0205 | DBF2       | -1.1 | -1.1 | -1.2 | -1.0 | putative ser/thr protein kinase by homology                     | YGR092w                    | orf19.1223  |
| CA4917 | ECM31      | 1.0  | -1.1 | -1.0 | -1.0 | Involved in cell wall biogenesis and architecture (by hon       | YBR176w                    | orf19.6057  |
| CA1008 | IPF14083   | -1.1 | -1.1 | -1.1 | -1.0 | similarity to <i>Saccharomyces cerevisiae</i> carrier protein F | YPR128c ; Missing in array | orf19.6254  |
| CA3843 | IPF7947    | -1.1 | -1.0 | 1.1  | -1.0 | unknown function                                                | YLR201c                    | orf19.6602  |
| CA1093 | MSM1       | 1.0  | 1.0  | -1.0 | -1.0 | mitochondrial methionyl-tRNA synthetase                         | YGR171c                    | orf19.3950  |
| CA5839 | IPF423     | 1.0  | 1.0  | -1.0 | -1.0 | unknown function                                                | YLR320w                    | orf19.7494  |
| CA1769 | IPF7581    | -1.1 | 1.0  | -1.0 | -1.0 | unknown function                                                |                            | orf19.5203  |
| CA2879 | IPF3779    | -1.0 | 1.1  | -1.0 | -1.0 | unknown function                                                |                            | orf19.5848  |
| CA3066 | IPF15813   | -1.0 | -1.2 | 1.0  | -1.0 | unknown function                                                | YLR223c                    | orf19.4281  |
| CA1366 | IPF11847   | 1.0  | 1.0  | 1.1  | -1.0 | unknown function                                                | YNL233w                    | orf19.4457  |
| CA2140 | IPF19665   | -1.5 | -1.3 | -1.2 | -1.0 | unknown function                                                | YOR349w                    | orf19.10046 |
| CA4093 | IPF5002    | -1.0 | -1.0 | -1.1 | -1.0 | GTP binding protein (by homology)                               | YHR168w                    | orf19.6653  |
| CA2090 | IPF3398.3  | 1.1  | -1.0 | 1.0  | -1.0 | unknown function, 3-prime end                                   |                            |             |
| CA3204 | IPF3446    | 1.1  | 1.1  | 1.1  | -1.0 | Unknown function                                                |                            | orf19.6186  |
| CA0236 | MDM10      | 1.0  | -1.0 | -1.0 | -1.0 | Involved in mitochondrial morphology and inheritance (t         | YAL010c                    | orf19.7814  |
| CA4315 | PPX1       | -1.1 | -1.1 | -1.1 | -1.0 | Exopolyphosphatase (by homology)                                | YHR201c                    | orf19.4107  |
| CA6098 | IPF61      | -1.0 | -1.2 | -1.1 | -1.0 | unknown function                                                | YDL148c                    | orf19.5959  |
| CA3561 | SLY1       | -1.1 | 1.0  | -1.1 | -1.0 | hydrophilic suppressor of YPT1 and member of the Sec            | YDR189w                    | orf19.3128  |
| CA2350 | CWH41.5EOC | 1.0  | 1.1  | 1.0  | -1.0 | ER glucosidase I, 5-prime end (by homology)                     |                            | orf19.4421  |
| CA0511 | IPF13975   | -1.1 | 1.1  | 1.0  | -1.0 | unknown function                                                | YCL047c                    | orf19.4953  |
| CA1626 | STR2       | -1.1 | -1.0 | 1.1  | -1.0 | O-succinylhomoserine (thiol)-lyase (by homology)                | YJR130c                    | orf19.1033  |
| CA5565 | QRI8       | 1.1  | 1.1  | 1.0  | -1.0 | E2 ubiquitin-conjugation enzyme (by homology)                   | YMR022w                    | orf19.7329  |
| CA0195 | IPF12688   | 1.2  | 1.0  | 1.1  | -1.0 | unknown function                                                | YOR280c                    | orf19.11403 |
| CA2174 | IPF20096   | -1.0 | 1.0  | 1.1  | -1.0 | unknown function                                                |                            | orf19.3763  |
| CA3179 | YLF2       | -1.0 | -1.0 | -1.1 | -1.0 | GTP-binding protein                                             | YHL014c                    | orf19.2128  |
| CA0805 | IPF12568   | -1.1 | 1.0  | 1.0  | -1.0 | unknown function                                                |                            | orf19.3516  |
| CA4165 | IPF7774    | -1.0 | 1.1  | -1.0 | -1.0 | unknown function                                                |                            | orf19.10485 |
| CA1420 | RNT1       | -1.1 | -1.1 | -1.1 | -1.0 | Ribonuclease III (by homology)                                  | YMR239c                    | orf19.11277 |
| CA5245 | DUR32      | 1.1  | 1.1  | 1.1  | -1.0 | Urea transport protein (by homology)                            |                            | orf19.5017  |
| CA0097 | IPF13290   | -1.0 | -1.1 | -1.1 | -1.0 | unknown function                                                |                            | orf19.5314  |
| CA2022 | CBK1       | 1.0  | 1.2  | -1.0 | -1.0 | serine/threonine protein kinase (by homology)                   | YNL161w                    | orf19.4909  |
| CA5498 | IPF772     | -1.2 | 1.0  | 1.1  | -1.0 | unknown function                                                | YPL249c                    | orf19.5340  |



|        |            |      |      |      |      |                                                                 |         |             |
|--------|------------|------|------|------|------|-----------------------------------------------------------------|---------|-------------|
| CA1050 | IPF19897   | 1.0  | 1.0  | 1.0  | -1.0 | unknown function                                                |         | orf19.3897  |
| CA0893 | IPF13517   | -1.1 | -1.0 | -1.0 | -1.0 | unknown function                                                | YBR280c | orf19.5752  |
| CA4978 | IPF2065    | 1.0  | 1.1  | -1.0 | -1.0 | unknown function                                                | YLR187w | orf19.5274  |
| CA3731 | SPC2       | 1.1  | 1.1  | 1.1  | -1.0 | signal peptidase 18 kDa subunit (by homology)                   | YML055w | orf19.4181  |
| CA0208 | IPF19850   | -1.0 | -1.0 | 1.1  | -1.0 | unknown function                                                |         | orf19.1227  |
| CA5751 | VPS8       | -1.2 | 1.0  | 1.0  | -1.0 | Vacuolar sorting protein (by homology)                          | YAL002w | orf19.5387  |
| CA1400 | IPF8067    | 1.0  | -1.0 | -1.0 | -1.0 | unknown function                                                | YNL127w | orf19.3697  |
| CA2895 | IFS1       | -1.0 | 1.0  | 1.1  | -1.0 | Unknown function                                                |         | orf19.2461  |
| CA2893 | IFS3       | 1.1  | -1.0 | 1.1  | -1.0 | Unknown function                                                |         | orf19.2463  |
| CA2735 | TFG2       | 1.1  | -1.0 | -1.1 | -1.0 | transcription initiation factor TFIIF middle subunit (by ho     | YGR005c | orf19.2111  |
| CA5781 | IPF1126    | -1.0 | 1.0  | 1.1  | -1.0 | unknown function                                                | YOR079c | orf19.5428  |
| CA4369 | TIM11      | 1.1  | -1.1 | -1.1 | -1.0 | subunit e of mitochondrial F1F0-ATPase by homology              |         |             |
| CA2643 | HSL1       | 1.0  | 1.0  | -1.1 | -1.0 | Ser/thr protein kinase that interacts genetically with hist     | YKL101w | orf19.4308  |
| CA4702 | IPF4213    | -1.1 | -1.1 | -1.1 | -1.0 | unknown function                                                |         | orf19.6930  |
| CA1086 | IPF1039    | 1.0  | 1.0  | -1.0 | -1.0 | unknown function                                                |         | orf19.12038 |
| CA5175 | IPF6041    | 1.1  | 1.1  | 1.0  | -1.0 | Similar to Legionella pneumophila sbpA                          |         | orf19.4612  |
| CA4731 | LIP3       | 1.0  | 1.0  | -1.0 | -1.0 | Secretory lipase                                                |         | orf19.4856  |
| CA5332 | IPF900.3   | 1.0  | -1.0 | 1.0  | -1.0 | unknown function, , 3-prime end                                 | YDR067c | orf19.7206  |
| CA1105 | IPF18760.3 | 1.1  | 1.0  | 1.1  | -1.0 | unknown function, 3-prime end                                   |         |             |
| CA3985 | POB3       | -1.3 | -1.1 | -1.0 | -1.0 | Binds DNA polymerase delta (by homology)                        | YML069w | orf19.1560  |
| CA5945 | IPF3492    | -1.0 | -1.0 | -1.1 | -1.0 | unknown function                                                | YDR041w | orf19.6752  |
| CA2426 | IPF9901    | -1.1 | 1.0  | -1.0 | -1.0 | similar to Saccharomyces cerevisiae rad18p DNA repair           | YCR066w | orf19.3407  |
| CA3417 | FRE41      | -1.0 | -1.0 | -1.0 | -1.0 | ferric reductase transmembrane component (by homology)          |         | orf19.6138  |
| CA4636 | IPF1520    | 1.1  | 1.0  | 1.0  | -1.0 | unknown function                                                |         | orf19.342   |
| CA0513 | IPF13972   | -1.0 | 1.0  | -1.0 | -1.0 | unknown function                                                | YCL048w | orf19.4955  |
| CA1577 | KNS1       | 1.0  | 1.1  | 1.0  | -1.0 | Ser/thr protein kinase (by homology)                            | YLL019c | orf19.12446 |
| CA4815 | CDH1       | -1.0 | 1.0  | -1.0 | -1.0 | Substrate-specific activator of APC-dependent proteoly          | YGL003c | orf19.2084  |
| CA3252 | IPF4722    | 1.0  | -1.1 | -1.1 | -1.0 | unknown Function                                                |         | orf19.3738  |
| CA0162 | IPF19168   | 1.0  | -1.0 | -1.0 | -1.0 | unknown function                                                |         | orf19.5616  |
| CA5730 | HST6       | 1.0  | -1.0 | -1.0 | -1.0 | ATP binding cassette protein                                    | YKL209c | orf19.7440  |
| CA2506 | IPF6794    | 1.0  | -1.0 | 1.1  | -1.0 | unknown function                                                |         | orf19.5596  |
| CA0502 | IPF16761   | 1.0  | 1.0  | 1.0  | -1.0 | unknown function                                                | YNL085w | orf19.2664  |
| CA3374 | IPF4683    | -1.0 | -1.1 | 1.0  | -1.0 | unknown Function                                                | YIL084c | orf19.1856  |
| CA2717 | MSB3       | 1.0  | 1.1  | 1.0  | -1.0 | GTPase-activating protein for Sec4p (by homology)               | YNL293w | orf19.8209  |
| CA5285 | HBS1.3F    | -1.1 | 1.0  | 1.2  | -1.0 | Translation elongation factor eEF-1 alpha chain homolo          | YKR084c | orf19.7144  |
| CA4024 | IPF7182    | 1.0  | -1.0 | -1.1 | -1.0 | unknown function                                                |         | orf19.3439  |
| CA0336 | IPF9869    | -1.0 | -1.0 | -1.0 | -1.0 | unknown function                                                |         | orf19.1371  |
| CA2065 | QCR2       | 1.0  | -1.2 | -1.2 | -1.0 | Ubiquinol--cytochrome-c reductase 40KD chain II (by hc          | YPR191w | orf19.2644  |
| CA1762 | IPF20014   | 1.0  | -1.0 | -1.0 | -1.0 | oxidoreductase by homology                                      | YIR035c |             |
| CA4390 | HOD1       | 1.1  | 1.1  | 1.2  | -1.0 | regulator of G2/M progression (by homology)                     |         |             |
| CA1825 | IPF9522.3F | 1.2  | -1.1 | -1.0 | -1.0 | septin, 3-prime end (by homology)                               |         | orf19.4266  |
| CA1040 | IPF4010    | 1.0  | -1.0 | 1.1  | -1.0 | unknown function                                                |         | orf19.2503  |
| CA2338 | NIT3       | 1.1  | -1.1 | -1.0 | -1.0 | nitrilase (by homology)                                         | YLR351c | orf19.2351  |
| CA2590 | PPH3.3B    | 1.0  | -1.0 | 1.1  | -1.0 | protein serine/threonine phosphatase, 3-prime end (by homology) |         | orf19.4378  |
| CA6116 | TOP3       | -1.0 | -1.0 | -1.1 | -1.0 | DNA topoisomerase III (by homology)                             | YLR234w | orf19.5934  |
| CA0521 | CKA2       | 1.0  | -1.0 | 1.1  | -1.0 | casein kinase II alpha chain (by homology)                      | YOR061w | orf19.3530  |
| CA2252 | IPF12844   | -1.0 | -1.0 | -1.0 | -1.0 | unknown function                                                | YOR287c | orf19.9898  |
| CA6069 | IPF4847    | -1.0 | 1.1  | 1.1  | -1.0 | unknown function                                                | YOR197w | orf19.5995  |
| CA4594 | IPF2212    | -1.1 | -1.0 | -1.2 | -1.0 | unknown function                                                |         | orf19.6912  |

|        |              |      |      |      |      |                                                                |          |             |
|--------|--------------|------|------|------|------|----------------------------------------------------------------|----------|-------------|
| CA0930 | ZORRO1A      | -1.0 | -1.2 | -1.2 | -1.0 | Putative reverse transcriptase                                 |          | orf19.559   |
| CA2368 | RPA190       | -1.2 | 1.1  | -1.1 | -1.0 | DNA-directed RNA polymerase I (by homology)                    | YOR341w  | orf19.1839  |
| CA4751 | IPF11473     | 1.0  | -1.0 | -1.1 | -1.0 | unknown function                                               |          | orf19.4828  |
| CA0050 | CTA25        | -1.0 | -1.1 | -1.1 | -1.0 | transcriptional activation                                     |          | orf19.362   |
| CA2652 | DNA2         | -1.0 | 1.0  | -1.1 | -1.0 | DNA helicase (by homology)                                     | YHR164c  | orf19.1192  |
| CA1380 | BCS1         | -1.0 | -1.1 | -1.1 | -1.0 | mitochondrial protein of the CDC48/PAS1/SEC18 (AAA)            | YDR375c  | orf19.458   |
| CA4805 | RAD5         | -1.0 | 1.0  | -1.0 | -1.0 | DNA helicase (by homology)                                     | YLR032w  | orf19.2097  |
| CA2704 | IPF12195     | 1.0  | -1.0 | 1.0  | -1.0 | unknown function                                               |          | orf19.4656  |
| CA4394 | IPF12297     | -1.0 | 1.0  | 1.0  | -1.0 | mycelial surface antigen (by homology)                         |          | orf19.3117  |
| CA6082 | CEM1         | -1.1 | -1.1 | -1.2 | -1.0 | 3-oxoacyl-[acyl-carrier-protein]-synthase (by homology)        | YER061c  | orf19.5977  |
| CA1053 | SCW11.3EOC   | 1.1  | 1.2  | 1.3  | -1.0 | glucanase gene family member, 3-prime end (by homology)        | YGL028c  | orf19.3893  |
| CA3127 | IPF8915      | 1.0  | 1.0  | -1.0 | -1.0 | unknown function                                               | YMR067c  | orf19.1359  |
| CA1811 | MTR10        | 1.0  | -1.0 | -1.1 | -1.0 | Involved in nuclear protein import                             | YOR160w  | orf19.1119  |
| CA5626 | IPF498       | 1.0  | -1.0 | -1.0 | -1.0 | unknown function                                               |          | orf19.7071  |
| CA5489 | MDH12        | 1.2  | -1.1 | 1.2  | -1.0 | mitochondrial malate dehydrogenase (by homology)               | YDL078c  | orf19.5323  |
| CA0356 | IPF2532      | -1.0 | 1.1  | 1.0  | -1.0 | unknown function                                               | YLR104w  | orf19.13952 |
| CA3831 | VMA22        | 1.1  | 1.0  | -1.0 | -1.0 | vacuolar ATPase assembly protein (by homology)                 | YHR060w  | orf19.6590  |
| CA5125 | RPP2         | 1.1  | 1.0  | -1.0 | -1.0 | acidic ribosomal protein by homology                           | YOL039w  |             |
| CA5207 | IPF2359      | -1.0 | 1.0  | 1.0  | -1.0 | unknown function                                               |          | orf19.7022  |
| CA3027 | IPF20126     | -1.0 | -1.0 | 1.1  | -1.0 | putative chromosome segregation protein (by homology)          | YDR470c  | orf19.11381 |
| CA1852 | 885.REPEAT2. | 1.0  | 1.1  | 1.0  | -1.0 | unknown function, 5-prime end                                  |          |             |
| CA2856 | IPF7062      | -1.0 | -1.0 | 1.0  | -1.0 | unknown function                                               | YPL067c  | orf19.1066  |
| CA4880 | RHC18        | 1.0  | -1.1 | -1.0 | -1.0 | Recombination repair protein (by homology)                     | YLR383w  | orf19.6568  |
| CA1378 | ERK2         | -1.0 | 1.0  | 1.0  | -1.0 | mitogen-activated protein kinase (MAP kinase)                  |          | orf19.460   |
| CA2500 | FIG4         | -1.0 | -1.0 | -1.0 | -1.0 | suppressor of sac1 mutation (by homology)                      | YNL325c  | orf19.5586  |
| CA4134 | COS162       | -1.0 | 1.0  | 1.0  | -1.0 | involved in manganese homeostasis (by homology)                | YCR044c  | orf19.4240  |
| CA0494 | RAD7         | 1.0  | 1.2  | 1.2  | -1.0 | nucleotide excision repair protein (by homology)               | YJR052w  | orf19.9070  |
| CA3050 | IPF13042     | -1.1 | -1.1 | -1.1 | -1.0 | similar to <i>Saccharomyces cerevisiae</i> Imh1p involved in v | YLR309c  | orf19.9948  |
| CA4537 | YNT2         | 1.1  | -1.1 | 1.0  | -1.0 | suppressor of rna12/yme2 (by homology)                         | YLR059c  | orf19.1466  |
| CA4065 | RPC25        | 1.1  | -1.1 | -1.0 | -1.0 | DNA-directed RNA polymerase III (by homology)                  | YKL144c  | orf19.443   |
| CA3512 | IPF11247     | -1.0 | 1.0  | 1.1  | -1.0 | unknown function                                               | YEL059ca | orf19.6359  |
| CA6026 | IPF610       | -1.0 | 1.0  | -1.0 | -1.0 | unknown function                                               | YDR489w  | orf19.7631  |
| CA2381 | YCK3.3F      | -1.0 | 1.1  | 1.1  | -1.0 | casein kinase I, 3-prime end (by homology)                     |          | orf19.2221  |
| CA0505 | IPF11988.3   | 1.1  | -1.0 | 1.0  | -1.0 | unknown function, 3-prime end                                  |          |             |
| CA1780 | IPF14509     | -1.0 | -1.0 | -1.1 | -1.0 | unknown function                                               |          | orf19.1827  |
| CA4931 | IPF8378      | 1.0  | 1.0  | -1.1 | -1.0 | unknown function                                               |          | orf19.6072  |
| CA5616 | PET8         | -1.0 | 1.1  | 1.2  | -1.0 | mitochondrial carrier protein (by homology)                    | YNL003c  | orf19.7082  |
| CA4167 | IPF7778      | -1.2 | 1.0  | -1.0 | -1.0 | putative carboxymethylenebutenolidase (dienelactone h          | YDL086w  | orf19.2966  |
| CA1381 | IPF8420      | 1.1  | 1.1  | 1.0  | -1.0 | unknown function                                               |          | orf19.929   |
| CA3615 | GIT1         | -1.0 | 1.0  | -1.0 | -1.0 | glycerophosphoinositol transporter (by homology)               | YCR098c  | orf19.34    |
| CA1046 | IPF11617     | -1.0 | 1.0  | -1.0 | -1.0 | unknown function                                               | YOR298w  | orf19.1647  |
| CA1455 | IPF15081     | -1.0 | 1.0  | -1.0 | -1.0 | phosphodiesterase (by homology)                                | YCR026c  | orf19.4409  |
| CA1371 | IPF19731     | 1.1  | 1.0  | 1.0  | -1.0 | unknown function                                               | YLR145w  | orf19.4962  |
| CA3135 | IPF8990      | 1.1  | -1.0 | 1.0  | -1.0 | unknown function                                               |          | orf19.1366  |
| CA3076 | IPF6101.3    | 1.0  | -1.0 | 1.0  | -1.0 | unknown function, 3-prime end                                  |          | orf19.4814  |
| CA5500 | IPF768       | -1.1 | 1.0  | -1.1 | -1.0 | unknown function                                               | YHR202w  | orf19.5342  |
| CA2987 | RPB11.3      | 1.0  | -1.0 | 1.0  | -1.0 | DNA-directed RNA polymerase II subunit, 3-prime end            | YOL005c  |             |
| CA0676 | IPF13097     | -1.0 | 1.0  | -1.0 | -1.0 | unknown function                                               |          | orf19.8772  |
| CA6019 | IPF625       | 1.0  | -1.0 | -1.0 | -1.0 | unknown function                                               | YOR144c  | orf19.7621  |

|        |             |      |      |      |      |                                                                       |                  |             |
|--------|-------------|------|------|------|------|-----------------------------------------------------------------------|------------------|-------------|
| CA2945 | IMG1        | 1.1  | 1.1  | 1.0  | -1.0 | Ribosomal protein, mitochondrial (by homology)                        | YCR046c          | orf19.1967  |
| CA1299 | PTK2        | 1.0  | -1.0 | -1.0 | -1.0 | serine /threonine protein kinase involved in polyamine u              | YJR059w          | orf19.3415  |
| CA3068 | LIP2        | -1.0 | 1.0  | 1.1  | -1.0 | Secretory lipase                                                      |                  | orf19.4804  |
| CA3209 | CTA2.5.3F   | -1.1 | 1.1  | 1.0  | -1.0 | transcriptional activator, 3-prime end                                |                  |             |
| CA1078 | SPR1        | -1.0 | -1.0 | 1.0  | -1.0 | exo-1,3-beta-glucanase precursor (by homology)                        |                  | orf19.2237  |
| CA1269 | IPF19726    | -1.2 | -1.1 | -1.0 | -1.0 | unknown function                                                      | YDL001w          | orf19.10667 |
| CA6043 | RFC4        | 1.1  | 1.1  | 1.0  | -1.0 | DNA replication factor C (by homology)                                | YOL094c          | orf19.7658  |
| CA3032 | IPF12319    | -1.1 | 1.0  | 1.0  | -1.0 | unknown function                                                      |                  | orf19.216   |
| CA0351 | RPB4.3F     | -1.1 | -1.0 | -1.1 | -1.0 | DNA-directed RNA polymerase II, 32 kDa subunit, 3-prii                | YJL140w          | orf19.145   |
| CA5968 | IPF946      | -1.0 | 1.0  | -1.0 | -1.0 | unknown function                                                      |                  | orf19.7561  |
| CA1877 | IPF10300    | -1.0 | 1.0  | 1.0  | -1.0 | unknown function                                                      |                  | orf19.2274  |
| CA0618 | UGT51       | -1.0 | 1.0  | 1.0  | -1.0 | UDP-glucose:sterol glucosyltransferase                                | YLR189c          | orf19.2616  |
| CA4473 | IPF6447     | 1.1  | 1.0  | 1.1  | -1.0 | unknown function                                                      |                  | orf19.1897  |
| CA1516 | IPF16764    | 1.4  | -1.0 | -1.0 | -1.0 | unknown function                                                      |                  | orf19.4796  |
| CA4141 | PTH2        | -1.0 | 1.0  | 1.2  | -1.0 | proline transport helper                                              |                  | orf19.11706 |
| CA4879 | IPF1660     | 1.1  | -1.0 | 1.0  | -1.0 | unknown function                                                      |                  | orf19.6566  |
| CA4609 | ZPR1        | 1.0  | 1.0  | -1.1 | -1.0 | Zinc finger protein (by homology)                                     | YGR211w          | orf19.3300  |
| CA3839 | IPF12744    | -1.0 | 1.1  | 1.1  | -1.0 | unknown function                                                      |                  |             |
| CA2970 | IPF14448    | 1.0  | -1.0 | 1.0  | -1.0 | unknown function                                                      |                  | orf19.5601  |
| CA4784 | IPF3359     | 1.1  | -1.0 | -1.0 | -1.0 | Unknown function                                                      |                  | orf19.4017  |
| CA5786 | IPF1134     | -1.0 | -1.0 | 1.0  | -1.0 | unknown function                                                      | YDR493w          | orf19.5433  |
| CA4324 | IPF2095     | 1.0  | 1.1  | -1.0 | -1.0 | unknown function                                                      |                  | orf19.4095  |
| CA4992 | IPF2036     | 1.1  | 1.0  | 1.1  | -1.0 | unknown function                                                      |                  | orf19.5256  |
| CA1556 | END3        | -1.1 | -1.1 | -1.0 | -1.0 | required for endocytosis and cytoskeletal organization (I             | YNL084c          | orf19.1711  |
| CA4355 | IPF3649     | 1.0  | 1.1  | -1.1 | -1.0 | unknown function                                                      | YCR016w          | orf19.6730  |
| CA2468 | IPF8723     | 1.0  | 1.0  | 1.0  | -1.0 | unknown function                                                      |                  | orf19.1797  |
| CA4787 | IPF3364     | 1.1  | -1.0 | -1.1 | -1.0 | Unknown function                                                      |                  | orf19.4021  |
| CA1249 | SPE4        | 1.1  | -1.0 | -1.1 | -1.0 | spermine synthase (by homology)                                       | YLR146c          | orf19.4960  |
| CA3666 | IPF11435    | 1.0  | -1.1 | 1.1  | -1.0 | unknown function                                                      | YDR231c          | orf19.6461  |
| CA2723 | IPF4805     | -1.1 | -1.1 | -1.1 | -1.0 | unknown Function                                                      | YDR409w          | orf19.3345  |
| CA2916 | IFA4        | -1.0 | 1.1  | -1.1 | -1.0 | unknown function                                                      |                  | orf19.4510  |
| 6672.2 |             | -1.0 | -1.0 | -1.0 | -1.0 |                                                                       |                  |             |
| CA0498 | CTA211.3F   | -1.0 | -1.1 | -1.1 | -1.0 | transcriptional activator, 3-prime end (by homology)                  | Missing in array | orf19.2661  |
| CA3575 | IPF11108    | -1.0 | 1.0  | -1.1 | -1.0 | unknown function                                                      | YCR052w          | orf19.2265  |
| CA0751 | IPF6286     | -1.0 | -1.1 | -1.1 | -1.0 | unknown function                                                      |                  | orf19.1971  |
| CA2051 | PXP5        | 1.0  | 1.0  | 1.1  | -1.0 | acyl-coenzyme A oxidase I precursor by homology to Candida tropicalis |                  | orf19.5723  |
| CA3231 | IPF14348.3  | 1.1  | 1.0  | -1.0 | -1.0 | unknown function, 3-prime end                                         |                  |             |
| CA5630 | IPF486      | 1.0  | -1.0 | -1.0 | -1.0 | unknown function                                                      | YOL146w          | orf19.7065  |
| CA1133 | F2710.REPEA | 1.2  | -1.0 | 1.1  | -1.0 | putative permease (by homology)                                       |                  | orf19.9706  |
| CA1685 | IPF12270    | 1.0  | 1.0  | 1.0  | -1.0 | unknown function                                                      |                  | orf19.3660  |
| CA0694 | IPF12603    | 1.0  | -1.1 | -1.0 | -1.0 | unknown function                                                      |                  | orf19.3289  |
| CA2343 | IPF8671     | -1.0 | 1.0  | 1.0  | -1.0 | unknown function                                                      | YCL008c          | orf19.2343  |
| CA5805 | IPF4153     | -1.2 | 1.0  | 1.2  | -1.0 | similar to Saccharomyces cerevisiae Sec6p protein invc                | YIL068c          | orf19.5463  |
| CA0649 | RFC3        | 1.1  | 1.0  | 1.0  | -1.0 | DNA replication factor C, 40 kDa subunit (by homology)                | YNL290w          | orf19.3211  |
| CA3184 | TSM1.5F     | 1.0  | 1.1  | -1.1 | -1.0 | component of TFIID complex, 5-prime end (by homology)                 |                  | orf19.2136  |
| CA1787 | IFH3        | 1.0  | -1.0 | -1.0 | -1.0 | Dioxygenase (by homology)                                             | YLL057c          | orf19.1167  |
| CA2731 | URIC        | 1.0  | -1.1 | -1.0 | -1.0 | uricase (urate oxidase) (by homology)                                 |                  | orf19.2114  |
| CA5860 | IPF376      | 1.0  | -1.0 | 1.1  | -1.0 | transcriptional regulator (by homology)                               |                  | orf19.7518  |
| CA1066 | IPF9001     | -1.0 | -1.0 | 1.1  | -1.0 | unknown function                                                      | YLR097c          | orf19.12107 |

|        |            |      |      |      |      |                                                                                  |                  |             |
|--------|------------|------|------|------|------|----------------------------------------------------------------------------------|------------------|-------------|
| CA0599 | IPF12428   | 1.1  | -1.2 | -1.1 | -1.0 | unknown function                                                                 | YHR088w          | orf19.10184 |
| CA0427 | IPF11995   | -1.0 | -1.0 | 1.2  | -1.0 | unknown function                                                                 | YDR302w          | orf19.2761  |
| CA5414 | IPF1568    | 1.0  | -1.0 | -1.1 | -1.0 | unknown function                                                                 | YDR156w          | orf19.962   |
| CA5739 | IPF2884    | -1.0 | -1.0 | 1.0  | -1.0 | unknown function                                                                 | YMR211w          | orf19.7449  |
| CA3433 | IPF6387.3  | 1.1  | 1.1  | 1.2  | -1.0 | unknown function, 3-prime end                                                    |                  |             |
| CA2554 | CIRT4B     | 1.0  | -1.1 | -1.1 | -1.0 | probable transposase (by homology)                                               |                  | orf19.2839  |
| CA0121 | IPF17048   | -1.0 | -1.0 | -1.1 | -1.0 | unknown function                                                                 | YOR322c          | orf19.983   |
| CA5371 | RPC10      | -1.0 | 1.0  | -1.0 | -1.0 | DNA-directed RNA polymerases small subunit by homo                               | YHR143wa         | orf19.7255  |
| CA5530 | SPB8       | 1.1  | -1.0 | -1.1 | -1.0 | Suppressor of PAB1 (by homology)                                                 | YJL124c          | orf19.7290  |
| CA5952 | IPF3503    | 1.1  | -1.0 | 1.0  | -1.0 | similar to <i>Saccharomyces cerevisiae</i> Fcp1p TFIIF intera                    | YMR277w          | orf19.6742  |
| CA4011 | IPF4240    | -1.2 | -1.2 | -1.2 | -1.0 | similar to <i>Saccharomyces cerevisiae</i> Ycg1p condensin                       | YDR325w          | orf19.1622  |
| CA3176 | IPF11588   | -1.0 | -1.0 | -1.0 | -1.0 | unknown function                                                                 | YML080w          | orf19.1404  |
| CA0131 | IPF13402   | 1.0  | -1.0 | 1.0  | -1.0 | unknown function                                                                 | YML071c          | orf19.36    |
| CA4550 | DYN2.3     | 1.1  | -1.0 | 1.1  | -1.0 | Dynein light chain 1, cytosolic, 3-prime end                                     | YDR424c          |             |
| CA2153 | IPF7900    | -1.1 | 1.0  | 1.0  | -1.0 | unknown function                                                                 | YGL047w          | orf19.6025  |
| CA4185 | HNM4       | 1.0  | 1.1  | 1.1  | -1.0 | Choline permease-like (by homology)                                              |                  | orf19.2946  |
| CA1985 | IPF9591    | 1.0  | -1.0 | 1.0  | -1.0 | unknown function                                                                 | YGR053c          | orf19.91    |
| CA0177 | IFL2       | 1.0  | 1.0  | -1.1 | -1.0 | unknown function                                                                 |                  | orf19.8268  |
| CA0742 | IPF3259    | 1.0  | -1.1 | 1.0  | -1.0 | unknown function                                                                 |                  | orf19.3142  |
| CA3717 | IPF6192    | 1.1  | -1.1 | -1.0 | -1.0 | unknown function                                                                 | YPL108w          | orf19.11643 |
| CA4372 | IPF5282    | 1.0  | 1.0  | 1.0  | -1.0 | unknown function                                                                 | YMR034c          | orf19.5663  |
| CA0429 | IPF14827   | 1.0  | 1.0  | 1.1  | -1.0 | unknown function                                                                 |                  | orf19.1611  |
| CA3342 | IPF13361   | -1.0 | -1.1 | 1.0  | -1.0 | unknown function                                                                 | YDR449c          | orf19.2330  |
| CA0588 | IPF13081   | -1.0 | 1.0  | -1.0 | -1.0 | unknown function                                                                 |                  | orf19.1162  |
| CA5321 | RAD6.3     | 1.1  | -1.0 | 1.1  | -1.0 | Ubiquitin protein ligase, 3-prime end                                            | YGL058w          | orf19.7195  |
| CA2323 | SMD2       | -1.0 | 1.0  | 1.0  | -1.0 | U1 snRNP protein of the Sm class protein (by homology)                           | YLR275w          |             |
| CA3533 | IPF13450   | 1.1  | 1.0  | 1.0  | -1.0 | unknown function                                                                 |                  | orf19.6366  |
| CA5627 | IPF495     | 1.0  | 1.0  | 1.0  | -1.0 | unknown function                                                                 | YBR261c          | orf19.7069  |
| CA0046 | IPF14850   | -1.0 | -1.1 | -1.1 | -1.0 | Hypothetical protein                                                             |                  | orf19.9988  |
| CA1686 | IPF12272   | -1.1 | 1.1  | 1.0  | -1.0 | unknown function                                                                 | YER139c          | orf19.3659  |
| CA1444 | KTR2       | -1.0 | 1.1  | 1.2  | -1.0 | mannosyltransferase (by homology)                                                | YKR061w          | orf19.4494  |
| CA1946 | IPF19937   | -1.1 | 1.0  | -1.0 | -1.0 | putative peptidyl-tRNA hydrolases (by homology)                                  | YHR189w          | orf19.4740  |
| CA4656 | IPF3095    | -1.1 | -1.1 | -1.0 | -1.0 | unknown function                                                                 | YDL235c          | orf19.4443  |
| CA2586 | IPF9435    | 1.0  | -1.1 | -1.0 | -1.0 | unknown function                                                                 | YLR285w          | orf19.4375  |
| CA0707 | IPF7711    | -1.0 | -1.1 | 1.0  | -1.0 | related to <i>Neurospora crassa</i> AP-1-like transcription factor (by homology) |                  | orf19.8298  |
| CA3099 | LST8       | 1.1  | 1.0  | 1.1  | -1.0 | required for transport of permeases from the golc                                | YNL006w          | orf19.3862  |
| CA0704 | IPF11806   | -1.1 | -1.0 | 1.1  | -1.0 | similar to <i>Saccharomyces cerevisiae</i> Ynd1p nucleoside                      | YER005w          | orf19.2915  |
| CA3303 | FRE42      | -1.0 | 1.0  | 1.0  | -1.0 | ferric reductase (by homology)                                                   |                  | orf19.2312  |
| CA4846 | IPF6945.3F | 1.0  | 1.1  | -1.0 | -1.0 | unknown function, 3-prime end                                                    |                  | orf19.3814  |
| CA1413 | MTR3       | -1.1 | -1.1 | -1.0 | -1.0 | Involved in mRNA transport (by homology)                                         | YGR158c          | orf19.168   |
| CA1642 | NHP1.5F    | -1.1 | -1.0 | -1.1 | -1.0 | unknown function, 5-prime end                                                    |                  | orf19.1730  |
| CA1567 | IPF7613    | 1.1  | 1.0  | -1.0 | -1.0 | unknown function                                                                 |                  | orf19.1156  |
| CA1585 | VPS27      | -1.1 | -1.0 | 1.1  | -1.0 | Vacuolar protein sorting (by homology)                                           | YNR006w          | orf19.6031  |
| CA0793 | IPF16273   | 1.0  | -1.0 | -1.0 | -1.0 | similar to <i>Saccharomyces cerevisiae</i> Dtr1p dityrosine tra                  | YBR180w          | orf19.553   |
| CA2412 | IPF13755   | 1.1  | 1.1  | 1.1  | -1.0 | unknown function                                                                 |                  | orf19.4481  |
| CA1573 | IPF15087   | -1.0 | -1.0 | -1.1 | -1.0 | unknown function                                                                 | Missing in array | orf19.1653  |
| CA5241 | SMF3       | 1.0  | 1.0  | 1.1  | -1.0 | Probable manganese transporter (by homology)                                     |                  | orf19.5022  |
| CA5210 | IPF2373    | 1.1  | -1.0 | 1.0  | -1.0 | unknown function                                                                 |                  | orf19.7027  |
| CA1017 | IPF11144   | 1.0  | -1.0 | 1.1  | -1.0 | unknown function                                                                 | YHR036w          | orf19.8105  |

|        |             |      |      |      |      |                                                                |                  |             |
|--------|-------------|------|------|------|------|----------------------------------------------------------------|------------------|-------------|
| CA2281 | HAT1        | -1.0 | 1.0  | -1.1 | -1.0 | histone acetyltransferase (by homology)                        | YPL001w          | orf19.779   |
| CA1087 | MYO5        | 1.1  | 1.1  | 1.1  | -1.0 | Myosin I (by homology)                                         | YMR109w          | orf19.8357  |
| CA1277 | IPF10837    | -1.0 | -1.0 | -1.0 | -1.0 | unknown function                                               | YDR083w          | orf19.3630  |
| CA0157 | IPF19178.3F | -1.0 | -1.0 | -1.0 | -1.0 | unknown function, 3-prime end                                  | Missing in array |             |
| CA3715 | IPF6205     | 1.1  | -1.0 | -1.1 | -1.0 | unknown function                                               | YJR014w          | orf19.4164  |
| CA5456 | IPF267      | -1.0 | -1.0 | -1.0 | -1.0 | unknown function                                               |                  | orf19.3264  |
| CA5665 | UBP1        | 1.0  | -1.1 | -1.0 | -1.0 | Ubiquitin-specific protease (by homology)                      | YDL122w          | orf19.7367  |
| CA3729 | IPF11901    | 1.0  | -1.0 | 1.0  | -1.0 | unknown function                                               |                  | orf19.4179  |
| CA0264 | IPF8434     | 1.1  | 1.0  | 1.1  | -1.0 | unknown function                                               |                  |             |
| CA1649 | LAB1        | 1.0  | -1.1 | -1.0 | -1.0 | Lipoate biosynthesis by homology                               | YJL046w          | orf19.5566  |
| CA3877 | CBP4        | -1.0 | -1.1 | -1.1 | -1.0 | Ubiquinol--cytochrome-c reductase assembly factor (by          | YGR174c          | orf19.392   |
| CA1153 | IPF10455    | 1.0  | 1.0  | 1.1  | -1.0 | unknown function                                               |                  | orf19.104   |
| CA5727 | ECM15       | 1.1  | 1.1  | 1.0  | -1.0 | Involved in cell wall biogenesis and architecture (by hon      | YBL001c          |             |
| CA4291 | IPF2615     | -1.0 | 1.0  | 1.0  | -1.0 | unknown function                                               |                  | orf19.6688  |
| CA4950 | IPF5143     | -1.0 | -1.0 | 1.1  | -1.0 | Unknown function                                               |                  | orf19.6528  |
| CA2066 | RPO26       | 1.2  | 1.1  | 1.0  | -1.0 | DNA-directed RNA polymerase I, II, III 18 KD subunit (b        | YPR187w          | orf19.2643  |
| CA4729 | VPS41.5F    | -1.0 | -1.0 | -1.0 | -1.0 | required for the vacuolar assembly, 5-prime end (by homology)  |                  | orf19.12321 |
| CA0661 | APG7        | -1.0 | 1.0  | 1.0  | -1.0 | component of the autophagic system (by homology)               | YHR171w          | orf19.8326  |
| CA3378 | RUB1        | 1.0  | 1.0  | -1.0 | -1.0 | ubiquitin-like protein (by homology)                           |                  |             |
| CA5916 | IPF19818    | -1.0 | -1.0 | -1.0 | -1.0 | similar to <i>Saccharomyces cerevisiae</i> Nud1p cell cycle re | YOR373w          | orf19.6789  |
| CA4244 | IPF4305     | 1.0  | -1.0 | -1.0 | -1.0 | unknown function                                               |                  | orf19.530   |
| CA2325 | IPF10977    | 1.0  | -1.1 | -1.0 | -1.0 | unknown function                                               | YLR281c          | orf19.5488  |
| CA0940 | IPF8616     | 1.1  | 1.0  | 1.0  | -1.0 | similar to <i>Saccharomyces cerevisiae</i> Rsm19p ribosoma     | YNR037c          |             |
| CA1267 | YSY6        | 1.1  | 1.1  | 1.2  | -1.0 | protein involved in the secretory pathway, by homology         |                  |             |
| CA6035 | BPL1        | -1.1 | 1.0  | 1.0  | -1.0 | biotin holocarboxylase synthetase (by homology)                | YDL141w          | orf19.7645  |
| CA6145 | IPF1869     | -1.2 | -1.0 | -1.2 | -1.0 | unknown function                                               | YBL104c          | orf19.5897  |
| CA4109 | IPF3967     | -1.0 | 1.1  | -1.0 | -1.0 | unknown function                                               |                  | orf19.673   |
| CA0727 | IPF7347     | 1.1  | 1.1  | 1.0  | -1.0 | unknown function                                               | YIL027c          | orf19.11214 |
| CA3955 | IPF6712.5F  | -1.1 | 1.1  | -1.2 | -1.0 | unknown function, 5-prime end                                  |                  | orf19.1414  |
| CA2398 | IPF6431     | 1.1  | 1.0  | -1.0 | -1.0 | unknown function                                               | YBR141c          | orf19.3539  |
| CA4379 | MEP2        | 1.0  | 1.0  | 1.0  | -1.0 | high affinity low capacity ammonia (by homology)               | YNL142w          | orf19.5672  |
| CA0465 | IPF14113    | -1.3 | -1.0 | -1.1 | -1.0 | unknown function                                               | YIL130w          | orf19.7800  |
| CA6013 | IPF635      | -1.0 | -1.0 | -1.0 | -1.0 | unknown function                                               |                  | orf19.7614  |
| CA4108 | IPF3968     | 1.0  | -1.0 | 1.0  | -1.0 | similar to <i>Saccharomyces cerevisiae</i> pre-mRNA splicing   | YDR243c          | orf19.672   |
| CA3804 | RIM1        | 1.1  | 1.2  | 1.1  | -1.0 | telomere-binding protein (by homology)                         |                  | orf19.2483  |
| CA5214 | IPF19807    | -1.1 | 1.0  | -1.0 | -1.0 | unknown function                                               |                  | orf19.7032  |
| CA5012 | IPF13943    | 1.0  | -1.0 | 1.0  | -1.0 | Unknown function                                               |                  | orf19.5235  |
| CA2684 | IFU3        | -1.0 | 1.0  | 1.0  | -1.0 | Unknown function                                               | YLR063w          | orf19.2575  |
| CA5976 | IPF928      | -1.0 | 1.1  | 1.1  | -1.0 | zinc-finger transcription factor of the Zn(2)-Cys(6) binuc     | YDL170w          | orf19.7570  |
| CA0840 | IFD1        | -1.0 | -1.0 | -1.1 | -1.0 | Putative aryl-alcohol dehydrogenase (by homology)              |                  | orf19.8650  |
| CA1517 | IPF11045    | 1.1  | 1.0  | 1.1  | -1.0 | unknown function                                               | YMR212c          | orf19.4798  |
| CA4267 | IPF2286     | 1.0  | 1.0  | -1.0 | -1.0 | unknown function                                               |                  | orf19.6661  |
| CA1265 | IPF10510    | -1.1 | -1.2 | -1.0 | -1.0 | unknown function                                               | YKR065c          | orf19.240   |
| CA5054 | IPF3704     | -1.0 | -1.0 | -1.0 | -1.0 | unknown function                                               | YNL218w          | orf19.3019  |
| CA2394 | IPF6424     | 1.0  | 1.0  | 1.0  | -1.0 | unknown function                                               |                  | orf19.11019 |
| CA3551 | IPF13229    | 1.1  | 1.0  | 1.1  | -1.0 | unknown function                                               | YDR520c          | orf19.3876  |
| CA2595 | ARG2        | -1.0 | -1.0 | -1.0 | -1.0 | acetylglutamate synthase (by homology)                         | YJL071w          | orf19.56    |
| CA5570 | IPF1992     | -1.0 | 1.0  | 1.0  | -1.0 | putative MFS transporter                                       |                  | orf19.7336  |
| CA3913 | IPF3283     | 1.0  | -1.0 | -1.1 | -1.0 | unknown function                                               | YPL011c          | orf19.4388  |



|        |             |      |      |      |      |                                                                            |                  |
|--------|-------------|------|------|------|------|----------------------------------------------------------------------------|------------------|
| CA3166 | IPF9634     | -1.0 | -1.0 | 1.0  | -1.0 | probable GATA zinc finger transcription factor (by homo YMR136w            | orf19.1577       |
| CA3824 | SKI8        | -1.1 | -1.1 | -1.0 | -1.0 | antiviral protein-like (by homology) YGL213c                               | orf19.5764       |
| CA5595 | IPF568      | 1.1  | 1.0  | -1.0 | -1.0 | similar to <i>Saccharomyces cerevisiae</i> Far1p cyclin-depe YJL157c       | orf19.7105       |
| CA2106 | IPF10714    | -1.0 | -1.1 | -1.1 | -1.0 | similar to pH-regulated (PHR) proteins YLR343w                             | orf19.3693       |
| CA4692 | COX6.3      | 1.0  | -1.0 | 1.0  | -1.0 | cytochrome-c oxidase subunit VI, 3-prime end (by hom YHR051w               |                  |
| CA1991 | F6617.REPEA | 1.0  | 1.0  | -1.1 | -1.0 | unknown function, repeated protein                                         | orf19.13839      |
| CA1115 | RPA12       | 1.0  | -1.0 | -1.0 | -1.0 | DNA-directed RNA polymerase I (by homology) YJR063w                        | orf19.2287       |
| CA0165 | IPF19165.3  | 1.0  | 1.0  | -1.0 | -1.0 | unknown function, 3-prime end                                              | Missing in array |
| CA5641 | GAC1        | 1.2  | -1.1 | 1.0  | -1.0 | ser/thr phosphoprotein phosphatase 1, regulatory chain YOR178c             | orf19.7053       |
| CA0533 | IPF19872    | 1.0  | -1.0 | 1.0  | -1.0 | unknown function YHR081w                                                   | orf19.5067       |
| CA3177 | IPF11589    | -1.1 | 1.0  | -1.0 | -1.0 | similar to <i>Saccharomyces cerevisiae</i> Pho13p 4-nitrophenylphosphatase | orf19.1405       |
| CA4579 | IPF2234     | -1.0 | 1.0  | 1.0  | -1.0 | unknown function                                                           | orf19.6898       |
| CA5354 | FTR2        | 1.2  | 1.1  | 1.2  | -1.0 | high affinity iron permease                                                | orf19.7231       |
| CA0642 | ERG25       | 1.5  | -1.1 | 1.1  | -1.0 | C-4 sterol methyl oxidase YGR060w                                          | orf19.3732       |
| CA2598 | IPF13142    | -1.0 | -1.0 | -1.0 | -1.0 | unknown function                                                           | orf19.53         |
| CA0285 | IPF14392    | -1.1 | 1.0  | -1.0 | -1.0 | unknown function                                                           | orf19.1535       |
| CA5149 | HGH1        | -1.1 | -1.1 | -1.1 | -1.0 | Similar to human HMG1 and HMG2 proteins (by homolc YGR187c                 | orf19.4587       |
| CA3386 | IPF6758     | -1.0 | 1.0  | -1.0 | -1.0 | unknown function                                                           | orf19.7954       |
| CA2722 | IPF4801     | -1.1 | -1.1 | -1.1 | -1.0 | similar to <i>Saccharomyces cerevisiae</i> Vps17p vacuolar s YOR132w       | orf19.3344       |
| CA2112 | PFD1        | 1.0  | 1.1  | -1.0 | -1.0 | Prefoldin subunit 1 (by homology) YJL179w                                  | orf19.3687       |
| CA5649 | CHS4        | -1.2 | -1.1 | -1.2 | -1.0 | Chitin synthase regulatory factor YBL061c ; Missing in array               | orf19.7349       |
| CA4615 | IPF7955     | 1.0  | 1.0  | 1.0  | -1.0 | DNA binding protein (by homology) YIL072w                                  | orf19.3306       |
| CA5613 | IPF525      | -1.0 | 1.2  | -1.0 | -1.0 | unknown function                                                           | orf19.7085       |
| CA1551 | IPF8741.3F  | -1.0 | -1.1 | -1.2 | -1.0 | unknown function, 3-prime end YDR217c                                      | orf19.4275       |
| CA2953 | MBP1        | -1.1 | -1.1 | -1.1 | -1.0 | transcription factor (by homology) YDL056w                                 | orf19.5855       |
| CA3591 | IFT2        | 1.0  | -1.0 | -1.1 | -1.0 | unknown function                                                           | orf19.2247       |
| CA2957 | DAL53       | 1.0  | -1.0 | 1.0  | -1.0 | allantoate permease (by homology)                                          | orf19.5859       |
| CA3908 | IPF3301     | 1.0  | -1.0 | 1.0  | -1.0 | unknown function                                                           | orf19.4394       |
| CA2456 | DBR1        | -1.1 | -1.0 | -1.0 | -1.0 | ariat-debranching enzyme (by homology) YKL149c                             | orf19.3506       |
| CA1621 | IFF6        | 1.1  | 1.0  | 1.0  | -1.0 | unknown function                                                           | orf19.11553      |
| CA3548 | IPF12179    | 1.0  | -1.1 | -1.0 | -1.0 | unknown function YGR026w ; Missing in array                                | orf19.3872       |
| CA5635 | IPF474      | -1.0 | 1.0  | 1.0  | -1.0 | unknown Function                                                           | orf19.7060       |
| CA2875 | MEI5        | 1.0  | 1.0  | 1.1  | -1.0 | meiotic protein (by homology) YPL121c                                      | orf19.5844       |
| CA3107 | GOS1        | -1.0 | 1.0  | 1.0  | -1.0 | SNARE protein of Golgi compartment (by homology) YHL031c                   | orf19.6551       |
| CA0960 | DPP1        | 1.0  | 1.0  | 1.2  | -1.0 | Diacylglycerol Pyrophosphate Phosphatase by homology                       | orf19.8271       |
| CA1538 | IDI1.3EOC   | 1.0  | -1.0 | -1.0 | -1.0 | Isopentenyl-diphosphate delta-isomerase, 3-prime end                       | orf19.4558       |
| CA1186 | IPF6930     | 1.0  | -1.0 | 1.1  | -1.0 | unknown function                                                           | orf19.3785       |
| CA0411 | IPF17676    | 1.0  | 1.1  | 1.1  | -1.0 | similar to <i>Saccharomyces cerevisiae</i> Cst13p involved in YBR158w      | orf19.1507       |
| CA5873 | IPF331      | 1.1  | 1.0  | -1.0 | -1.0 | GPI-anchored cell surface protein (by homology)                            | orf19.7542       |
| CA0071 | IPF19290.3  | 1.0  | 1.0  | -1.0 | -1.0 | unknown function, 3-prime end                                              | Missing in array |
| CA2740 | IPF10633    | 1.1  | 1.0  | 1.1  | -1.0 | unknown function YLR326w                                                   | orf19.2106       |
| CA2518 | CBP3        | -1.0 | 1.0  | -1.0 | -1.0 | involved in cytochrome-c reductase assembly (by homo YPL215w               | orf19.5515       |
| CA5233 | SSK1        | 1.1  | 1.0  | -1.0 | -1.0 | Putative reponse regulator two-component phosphorela YLR006c               | orf19.5031       |
| CA1015 | IPF15547    | 1.0  | 1.0  | 1.1  | -1.0 | putative glutamyl-tRNA amidotransferase subunit A (by YMR293c              | orf19.11438      |
| CA2949 | IPF14506    | 1.0  | -1.0 | 1.0  | -1.0 | unknown function                                                           | orf19.9516       |
| CA3563 | IPF7819     | -1.0 | 1.0  | 1.0  | -1.0 | unknown function YLR243w                                                   | orf19.3130       |
| Empty  |             | 1.0  | -1.0 | 1.0  | -1.0 |                                                                            |                  |
| CA0713 | IFJ2        | 1.1  | -1.1 | -1.1 | -1.0 | Unknown function YGR263c                                                   | orf19.2168       |
| CA5336 | IPF893      | -1.0 | 1.1  | 1.0  | -1.0 | unknown function YJR008w                                                   | orf19.7210       |

|        |            |      |      |      |      |                                                                                             |                            |             |
|--------|------------|------|------|------|------|---------------------------------------------------------------------------------------------|----------------------------|-------------|
| CA2993 | IPF9118    | 1.0  | -1.0 | -1.0 | -1.0 | unknown function                                                                            | YPR017c                    | orf19.6118  |
| CA3357 | IPF9562    | -1.0 | 1.0  | 1.0  | -1.0 | similar to <i>Saccharomyces cerevisiae</i> Nuf2pspindle pole                                | YOL069w                    | orf19.1941  |
| CA4781 | IPF3355    | -1.0 | -1.0 | -1.1 | -1.0 | similar to <i>Saccharomyces cerevisiae</i> Cdc1 cell cycle protein involved in ion homeosta |                            | orf19.4014  |
| CA0560 | GPX3       | 1.1  | -1.0 | -1.0 | -1.0 | glutathione peroxidase (by homology)                                                        |                            | orf19.87    |
| CA0175 | NPL4       | -1.4 | 1.1  | 1.1  | -1.0 | nuclear protein localization factor and ER translocation r                                  | YBR170c                    | orf19.9970  |
| CA3761 | IFR3       | 1.0  | -1.0 | 1.1  | -1.0 | unknown function                                                                            |                            | orf19.2908  |
| CA1722 | TEF41      | -1.0 | -1.1 | -1.0 | -1.0 | Probable translation elongation factor (by homology)                                        |                            | orf19.2652  |
| CA4541 | IPF6257    | 1.0  | 1.0  | -1.0 | -1.0 | unknown function                                                                            |                            | orf19.1461  |
| CA3703 | IPF11945   | 1.1  | -1.0 | -1.1 | -1.0 | unknown function                                                                            |                            | orf19.6281  |
| CA5752 | IPF1055    | -1.0 | 1.1  | 1.1  | -1.0 | unknown function                                                                            | YAR003w                    | orf19.5388  |
| CA4531 | SLA1       | 1.1  | 1.2  | 1.2  | -1.0 | cytoskeleton assembly control protein                                                       | YBL007c                    | orf19.1474  |
| CA0100 | IPF11569   | -1.0 | -1.1 | -1.0 | -1.0 | unknown function                                                                            |                            | orf19.7682  |
| CA0331 | ANC1       | 1.1  | 1.0  | 1.0  | -1.0 | TFIIF subunit, transcription initiation factor (by homology)                                | YPL129w                    | orf19.798   |
| CA3158 | IPF13131.3 | 1.0  | 1.0  | 1.1  | -1.0 | unknown function, 3-prime end                                                               | Missing in array           | orf19.1587  |
| CA1023 | IPF4817    | -1.0 | -1.0 | -1.1 | -1.0 | unknown function                                                                            |                            | orf19.10860 |
| CA1134 | IPF2702    | 1.0  | -1.0 | 1.1  | -1.0 | unknown function                                                                            | YBR074w                    | orf19.2163  |
| CA0430 | PRC1       | -1.0 | -1.0 | -1.0 | -1.0 | Carboxypeptidase Y precursor                                                                | YMR297w                    | orf19.1339  |
| CA2499 | SAP5       | 1.0  | 1.0  | -1.0 | -1.0 | secreted aspartyl proteinase 5                                                              |                            | orf19.5585  |
| CA5841 | IPF420     | -1.0 | -1.1 | -1.1 | -1.0 | unknown function                                                                            | YGR003w                    | orf19.7497  |
| CA0666 | FIP1       | 1.0  | 1.0  | -1.0 | -1.0 | Component of pre-mRNA polyadenylation factor PF (by                                         | YJR093c                    | orf19.11734 |
| CA4741 | IPF4496    | -1.1 | -1.0 | -1.0 | -1.0 | unknown function                                                                            | YLR047c                    | orf19.4843  |
| CA4987 | IPF2045    | 1.0  | 1.0  | 1.0  | -1.0 | unknown function                                                                            |                            | orf19.5262  |
| CA3086 | GLR1       | -1.2 | -1.0 | 1.0  | -1.0 | by similarity to <i>S. cerev.</i> and <i>C. albicans</i> :glutathione red                   | YPL091w                    | orf19.11623 |
| CA3316 | IPF8817    | 1.1  | 1.1  | 1.0  | -1.0 | putative proteasome subunit (by homology)                                                   | YIL007c                    | orf19.2301  |
| CA5858 | IPF380     | 1.0  | 1.0  | 1.0  | -1.0 | unknown function                                                                            |                            | orf19.7516  |
| COX3b  |            | 1.0  | -1.1 | -1.1 | -1.0 |                                                                                             |                            |             |
| CA0079 | IPF14323   | 1.0  | -1.0 | 1.0  | -1.0 | unknown function                                                                            | YNL050c                    | orf19.4730  |
| CA3413 | IPF9239    | -1.0 | -1.0 | -1.1 | -1.0 | unknown function                                                                            |                            | orf19.6142  |
| CA4371 | PEP7       | -1.1 | -1.0 | -1.1 | -1.0 | vacuolar segregation protein by homology                                                    | YDR323c                    | orf19.5662  |
| CA3595 | IPF6079    | 1.0  | -1.0 | 1.0  | -1.0 | putative permease (by homology)                                                             |                            | orf19.4923  |
| CA2372 | IPF10335   | -1.1 | -1.1 | -1.0 | -1.0 | unknown function                                                                            |                            | orf19.1834  |
| CA1447 | NRK1       | 1.3  | -1.0 | -1.1 | -1.0 | Cdc31p-interacting ser/thr protein kinase (by homology)                                     | YHR102w                    | orf19.191   |
| CA2387 | IPF8504    | -1.0 | 1.0  | -1.0 | -1.0 | unknown function                                                                            |                            | orf19.2612  |
| CA1744 | IPF10889   | 1.1  | 1.0  | 1.0  | -1.0 | unknown function                                                                            | YFR045w                    | orf19.2502  |
| CA4317 | IPF2109    | 1.0  | -1.0 | -1.2 | -1.0 | unknown function                                                                            | YMR048w                    | orf19.4105  |
| SCORC4 |            | 1.1  | 1.1  | 1.0  | -1.0 |                                                                                             |                            |             |
| CA1810 | FDH2       | 1.0  | -1.0 | -1.0 | -1.0 | Formate dehydrogenase (by homology)                                                         |                            | orf19.1117  |
| CA0450 | IPF9353    | -1.0 | -1.1 | -1.0 | -1.0 | unknown function                                                                            | YMR123w                    | orf19.2378  |
| CA4328 | IPF2090    | 1.0  | -1.0 | -1.0 | -1.0 | similar to <i>Saccharomyces cerevisiae</i> Srb5p DNA-directe                                | YGR104c                    | orf19.4091  |
| CA3976 | SNU23      | -1.0 | 1.1  | 1.1  | -1.0 | RNA binding zinc finger protein (by homology)                                               | YDL098c ; Missing in array | orf19.1548  |
| CA0912 | RPA49      | 1.0  | 1.0  | 1.0  | -1.0 | DNA-directed RNA polymerase A (by homology)                                                 | YNL248c                    | orf19.9567  |
| CA6132 | DUR35.5F   | 1.0  | 1.0  | 1.0  | -1.0 | Urea transport protein, 5-prime end (by homology)                                           |                            | orf19.5916  |
| CA3727 | HIS5.3F    | -1.1 | -1.1 | -1.0 | -1.0 | Histidinol-phosphate aminotransferase, 3-prime end (by                                      | YIL116w                    | orf19.4177  |
| CA2786 | KRE5.3EOC  | -1.1 | -1.0 | -1.1 | -1.0 | UDP-glucose:glycoprotein glucosyltransferase, 3-prime                                       | YOR336w                    | orf19.290   |
| CA1817 | IPF7021    | -1.2 | -1.1 | -1.2 | -1.0 | similar to <i>Saccharomyces cerevisiae</i> Exo84p exocyst pr                                | YBR102c                    | orf19.135   |
| CA2430 | IPF12950   | 1.1  | -1.1 | -1.1 | -1.0 | unknown function                                                                            |                            | orf19.3402  |
| CA1326 | IPF6679    | -1.0 | 1.0  | -1.0 | -1.0 | unknown function                                                                            |                            | orf19.1306  |
| CA1590 | IPF14665   | -1.0 | 1.1  | 1.0  | -1.0 | unknown function                                                                            | YFL027c                    | orf19.11790 |
| CA2025 | IPF9618    | -1.0 | -1.0 | -1.1 | -1.0 | unknown function                                                                            |                            | orf19.4911  |

|          |              |      |      |      |      |                                                                                            |                             |             |
|----------|--------------|------|------|------|------|--------------------------------------------------------------------------------------------|-----------------------------|-------------|
| CA2077   | IPF13353     | 1.1  | 1.0  | -1.0 | -1.0 | unknown function                                                                           |                             | orf19.4872  |
| CA5048   | IPF20024     | -1.0 | -1.1 | 1.1  | -1.0 | unknown function                                                                           | YDR421w                     | orf19.10530 |
| CA1130   | NAG1         | -1.0 | -1.0 | -1.0 | -1.0 | Glucosamine-6-phosphate deaminase                                                          |                             | orf19.9703  |
| CA5998   | IPF670       | 1.1  | 1.0  | 1.0  | -1.0 | unknown function                                                                           | YOR023c                     | orf19.7598  |
| CA4736   | IPF4503      | 1.0  | 1.0  | -1.1 | -1.0 | unknown function                                                                           | YIR011c                     | orf19.4849  |
| CA4900   | IFP2         | 1.0  | 1.0  | -1.0 | -1.0 | unknown function                                                                           |                             | orf19.6037  |
| CA0671   | GRP4         | 1.0  | -1.0 | 1.0  | -1.0 | putative reductase (by homology)                                                           |                             | orf19.10660 |
| CA3280   | IPF6269.3    | 1.0  | -1.0 | 1.0  | -1.0 | unknown function, 3-prime end                                                              |                             |             |
| CA0635   | IPF9036      | 1.0  | 1.0  | 1.1  | -1.0 | similar to <i>Saccharomyces cerevisiae</i> Rap1p DNA-binding                               |                             | orf19.9342  |
| CA3582   | IPF15466     | 1.0  | 1.0  | 1.0  | -1.0 | unknown function                                                                           |                             | orf19.2258  |
| CA3849   | IPF7938      | -1.0 | 1.1  | 1.1  | -1.0 | similar to <i>Saccharomyces cerevisiae</i> Stu2p suppressor                                | YLR045c                     | orf19.6610  |
| CA0552   | IPF4343      | -1.0 | -1.0 | 1.0  | -1.0 | similar to <i>Saccharomyces cerevisiae</i> Vps9p vacuolar soi                              | YML097c                     | orf19.5533  |
| E coli 1 |              | 1.0  | -1.0 | -1.0 | -1.0 |                                                                                            |                             |             |
| CA1645   | PMC1         | -1.1 | -1.0 | -1.0 | -1.0 | Ca2+-transporting P-type ATPase (by homology)                                              | YGL006w                     | orf19.1727  |
| CA4214   | IPF5796      | 1.0  | 1.0  | 1.0  | -1.0 | unknown function                                                                           |                             | orf19.812   |
| CA0772   | UGA11.EXON2  | -1.0 | -1.1 | -1.1 | -1.0 | 4-aminobutyrate aminotransferase, exon 2 (by homology)                                     |                             |             |
| CA5780   | IPF1123      | -1.0 | -1.0 | 1.0  | -1.0 | unknown function                                                                           | YKR089c                     | orf19.5426  |
| CA4766   | IPF13056     | 1.0  | 1.1  | 1.1  | -1.0 | unknown function                                                                           |                             | orf19.3998  |
| CA5158   | IPF992       | -1.1 | -1.0 | 1.0  | -1.0 | unknown function                                                                           |                             | orf19.4596  |
| CA3787   | HPT1         | -1.2 | -1.1 | 1.1  | -1.0 | hypoxanthine guanine phosphoribosyl transferase (by ho                                     | YDR399w                     | orf19.5832  |
| CA3484   | IPF3214      | 1.0  | 1.1  | -1.0 | -1.0 | HSP-mitochondrial chaperone (by homology)                                                  | YNL328c                     | orf19.3574  |
| CA5506   | IPF748       | -1.1 | -1.0 | 1.1  | -1.0 | unknown function                                                                           | YML112w                     | orf19.5350  |
| CA1193   | MSY1         | 1.0  | -1.1 | 1.1  | -1.0 | tyrosyl-tRNA synthetase 8 by homology                                                      | YPL097w                     | orf19.7756  |
| CA3148   | IPF9808      | 1.0  | 1.0  | 1.0  | -1.0 | similar to <i>Saccharomyces cerevisiae</i> cse4p with strong                               | YKL049c                     | orf19.6163  |
| CA4824   | HNM2         | -1.0 | 1.1  | -1.0 | -1.0 | Choline permease (by homology)                                                             | YGL077c                     | orf19.2072  |
| CA4360   | IPF6050      | -1.0 | -1.1 | -1.0 | -1.0 | unknown function                                                                           |                             | orf19.6737  |
| CA5116   | TPM2.3       | 1.5  | -1.1 | -1.0 | -1.0 | Tropomyosin, 3-prime end                                                                   | YIL138c                     |             |
| CA0830   | APL5         | -1.0 | -1.0 | -1.0 | -1.0 | AP-3 complex subunit, gamma-adaptin (by homology)                                          | YPL195w                     | orf19.7879  |
| CA3541   | IPF5425      | 1.1  | 1.0  | -1.1 | -1.0 | similar to <i>Saccharomyces cerevisiae</i> Ppm1p carboxy m                                 | YDR435c                     | orf19.6377  |
| CA3237   | SPB4         | -1.0 | 1.0  | -1.0 | -1.0 | ATP-dependent RNA helicase of DEAH box family (by h                                        | YFL002c                     | orf19.6298  |
| CA5447   | IPF234       | -1.0 | -1.0 | 1.1  | -1.0 | similar to <i>Saccharomyces cerevisiae</i> Prp40p splicing fac                             | YKL012w                     | orf19.3250  |
| CA6100   | IPF66        | 1.1  | 1.2  | -1.0 | -1.0 | unknown function                                                                           | YPR154w                     | orf19.5956  |
| CA5960   | PMT5         | 1.1  | 1.0  | 1.1  | -1.0 | protein mannosyltransferase (by homology)                                                  |                             | orf19.7549  |
| CA1565   | EGD1         | 1.1  | -1.1 | -1.3 | -1.0 | GAL4 DNA-binding enhancer protein (by homology)                                            | YPL037c                     | orf19.1154  |
| CA2692   | IPF9173.3F   | -1.0 | -1.0 | -1.0 | -1.0 | similar to <i>Saccharomyces cerevisiae</i> Vps30p involved in vacuolar protein sorting and |                             | orf19.10246 |
| CA2956   | EGD2         | 1.2  | 1.1  | -1.0 | -1.0 | Nascent polypeptide associated complex protein alpha                                       | YHR193c                     | orf19.5858  |
| CA1112   | PF18758.5EOC | 1.0  | 1.0  | 1.1  | -1.0 | unknown function, 5-prime end                                                              |                             | orf19.2282  |
| CA5939   | IPF3484      | -1.1 | -1.0 | -1.0 | -1.0 | aldo/keto reductase (by homology)                                                          |                             | orf19.6758  |
| CA4563   | IPF6566      | 1.1  | -1.0 | 1.0  | -1.0 | unknown function                                                                           | YBL071wa ; Missing in array |             |
| CA4443   | IPF3535      | -1.0 | 1.0  | 1.1  | -1.0 | unknown function                                                                           |                             | orf19.6840  |
| CA4440   | IPF13864     | -1.0 | -1.0 | -1.0 | -1.0 | similar to <i>Saccharomyces cerevisiae</i> Chs6p chitin biosy                              | YJL099w                     | orf19.5155  |
| CA2299   | IPF8222      | -1.0 | -1.0 | 1.0  | -1.0 | unknown function                                                                           | YGL014w                     | orf19.5381  |
| CA4801   | APM1         | -1.0 | -1.1 | -1.0 | -1.0 | AP-1 complex subunit, mu1 subunit (by homology)                                            | YPL259c                     | orf19.4036  |
| CA2542   | IPF16067     | 1.1  | 1.1  | 1.1  | -1.0 | unknown function                                                                           | YOL089c                     | orf19.3190  |
| SCGPM1   |              | 1.0  | 1.1  | -1.0 | -1.0 |                                                                                            |                             |             |
| CA1119   | IPF7669.3    | 1.0  | 1.1  | -1.0 | -1.0 | unknown function, 3-prime end                                                              |                             |             |
| CA4025   | SCJ1         | -1.0 | 1.0  | -1.0 | -1.0 | Mitochondrial and ER import protein (by homology)                                          | YMR214w                     | orf19.3438  |
| CA5988   | IPF693       | 1.1  | 1.1  | 1.0  | -1.0 | unknown function                                                                           | YOR305w                     | orf19.7588  |
| CA3520   | IPF6785      | 1.1  | 1.1  | 1.0  | -1.0 | unknown function                                                                           |                             | orf19.997   |

|         |               |      |      |      |      |                                                                   |                  |             |
|---------|---------------|------|------|------|------|-------------------------------------------------------------------|------------------|-------------|
| CA1674  | PAF1          | -1.2 | -1.2 | -1.2 | -1.0 | DNA-directed RNA polymerase II regulator by homology              | YBR279w          | orf19.3613  |
| CA1819  | IPF16549      | -1.0 | -1.0 | 1.0  | -1.0 | Unknown function                                                  | YLR139c          | orf19.4273  |
| CA4861  | IPF4094       | 1.0  | 1.1  | -1.2 | -1.0 | unknown function                                                  | YGR001c          | orf19.3836  |
| CA5870  | IPF345        | -1.0 | -1.0 | -1.0 | -1.0 | FH1/FH2 involved in cytokinesis and polarity (by homology)        |                  | orf19.7537  |
| CA0101  | IPF10105      | 1.1  | 1.0  | 1.1  | -1.0 | RNA polymerase-like (by homology)                                 | YOL135c          | orf19.232   |
| CA0737  | SEC16.53F.EOC | -1.0 | 1.0  | -1.0 | -1.0 | Multidomain vesicle coat protein, internal fragment (by homology) |                  |             |
| CA3102  | RLP7          | 1.0  | 1.0  | 1.0  | -1.0 | ribosomal-like proteins                                           | YNL002c          | orf19.3867  |
| CA2649  | IPF9057       | -1.1 | 1.2  | -1.1 | -1.0 | unknown function                                                  |                  | orf19.1189  |
| CA1313  | IPF14126      | 1.1  | 1.0  | 1.0  | -1.0 | unknown function                                                  |                  | orf19.3638  |
| CA0730  | IPF7334       | 1.0  | -1.0 | -1.1 | -1.0 | unknown function                                                  | YOR004w          | orf19.11208 |
| CA0022  | IPF19421      | 1.0  | -1.1 | 1.0  | -1.0 | unknown function                                                  | Missing in array | orf19.162   |
| CA1325  | IPF6678       | 1.0  | -1.0 | 1.1  | -1.0 | unknown function                                                  |                  | orf19.1307  |
| CA0222  | IPF12141      | 1.0  | -1.1 | -1.1 | -1.0 | unknown function                                                  |                  | orf19.9508  |
| CA3802  | AUT7.EXON2    | 1.1  | 1.0  | 1.2  | -1.0 | microtubule-associated protein essential for autophagy,           | YBL078c          |             |
| CA2122  | CPY1.3F       | 1.1  | -1.0 | 1.0  | -1.0 | Carboxypeptidase Y precursor, 3-prime end                         |                  | orf19.8919  |
| CA0839  | IPF12492      | -1.0 | 1.1  | 1.0  | -1.0 | unknown function                                                  |                  |             |
| CA3395  | IPF13616      | -1.1 | 1.0  | -1.0 | -1.0 | unknown function                                                  | YGR251w          | orf19.3970  |
| CA3504  | IPF11369      | -1.0 | 1.0  | -1.0 | -1.0 | unknown function                                                  |                  | orf19.6350  |
| CA1937  | MMM1          | 1.0  | -1.0 | -1.1 | -1.0 | mitochondrial outer membrane protein (by homology)                | YLL006w          | orf19.4187  |
| CA2878  | RET1          | 1.0  | 1.0  | 1.0  | -1.0 | DNA-directed RNA polymerase III (by homology)                     | YOR207c          | orf19.5847  |
| CA3393  | IPF6748       | -1.1 | -1.0 | -1.1 | -1.0 | unknown function                                                  | YMR052w          | orf19.315   |
| CA3605  | IPF3865       | 1.2  | -1.1 | -1.1 | -1.0 | unknown function                                                  |                  | orf19.22    |
| CA2718  | IPF7374       | 1.1  | -1.0 | 1.0  | -1.0 | unknown function                                                  |                  | orf19.10847 |
| CA1945  | MSS116        | -1.0 | -1.1 | -1.0 | -1.0 | RNA helicase of the DEAD box family (by homology)                 | YDR194c          | orf19.4739  |
| CA3071  | NUP188        | 1.0  | 1.0  | 1.1  | -1.0 | Nucleoporin                                                       | YML103c          | orf19.4808  |
| CA1485  | IPF20082      | 1.0  | 1.0  | -1.0 | -1.0 | unknown function                                                  | YOR238w          | orf19.4061  |
| CA6076  | PAC10.3       | 1.1  | 1.0  | -1.1 | -1.0 | Non-native Actin Binding Complex Component, 3-prime               | YGR078c          | orf19.5985  |
| CA0648  | IPF12399      | 1.1  | 1.1  | 1.1  | -1.0 | unknown function                                                  |                  | orf19.3210  |
| CA3911  | IPF3292       | 1.0  | 1.0  | -1.1 | -1.0 | unknown function                                                  |                  | orf19.4391  |
| CA4096  | KRR1          | 1.1  | -1.0 | 1.0  | -1.0 | involved in cell division and spore germination                   | YCL059c          | orf19.661   |
| CA1409  | SPT16         | -1.0 | 1.0  | 1.0  | -1.0 | general chromatin factor (by homology)                            | YGL207w          | orf19.2884  |
| CA0872  | IPF13100      | -1.0 | 1.0  | 1.0  | -1.0 | unknown function                                                  | YJL073w          | orf19.3592  |
| CA1628  | HMG1          | 1.0  | -1.1 | -1.0 | -1.0 | 3-hydroxy-3-methylglutaryl-coenzyme A                             | red YLR450w      | orf19.1031  |
| CA2603  | IPF5471       | 1.0  | 1.0  | -1.1 | -1.0 | unknown function                                                  |                  | orf19.5680  |
| CA1848  | IPF11128      | 1.0  | 1.0  | 1.0  | -1.0 | unknown function                                                  | YMR225c          |             |
| CA5883  | IPF2425       | 1.0  | -1.0 | -1.0 | -1.0 | unknown function                                                  | YDR088c          | orf19.6827  |
| CA5658  | IPF1242       | -1.0 | 1.0  | 1.0  | -1.0 | unknown function                                                  | YPL047w          | orf19.7360  |
| Pho4 BD |               | -1.0 | -1.0 | 1.0  | -1.0 |                                                                   |                  |             |
| CA4318  | IPF2106       | 1.1  | 1.0  | -1.0 | -1.0 | unknown function                                                  |                  | orf19.4104  |
| CA1032  | IPF19896      | -1.0 | 1.0  | -1.1 | -1.0 | unknown function                                                  |                  | orf19.3852  |
| CA4079  | IPF2527       | -1.0 | 1.0  | 1.0  | -1.0 | unknown function                                                  |                  | orf19.6635  |
| CA0880  | IPF19542.3F   | 1.2  | 1.1  | 1.3  | -1.0 | unknown function, 3-prime end                                     | YER163c          | orf19.372   |
| CA1652  | RNH1.EXON1    | 1.2  | -1.0 | -1.0 | -1.0 | Ribonuclease H, exon 1 (by homology)                              | YMR234w          | orf19.5563  |
| CA3136  | IPF8989       | 1.0  | -1.0 | 1.0  | -1.0 | unknown function                                                  | YAL034wa         | orf19.1367  |
| CA1929  | SAP7          | 1.1  | 1.0  | 1.1  | -1.0 | secreted aspartyl proteinase 7                                    |                  | orf19.8376  |
| CA3193  | IPF3418       | -1.1 | 1.0  | -1.1 | -1.0 | unknown function                                                  | YCL029c          | orf19.6170  |
| CA2411  | IFI3.3        | 1.0  | -1.0 | -1.0 | -1.0 | Unknown function, 3-prime end                                     |                  | orf19.4483  |
| CA2353  | VPS13         | 1.1  | 1.0  | 1.0  | -1.0 | involved in regulating membrane traffic (by homology)             | YLL040c          | orf19.4416  |
| CA1106  | IPF11270      | 1.1  | 1.0  | 1.0  | -1.0 | unknown function                                                  | YOL077c          | orf19.12697 |

|        |              |      |      |      |      |                                                                                 |                            |             |
|--------|--------------|------|------|------|------|---------------------------------------------------------------------------------|----------------------------|-------------|
| CA4248 | IPF4294      | -1.0 | 1.0  | 1.0  | -1.0 | unknown function                                                                | YBR197c                    | orf19.537   |
| CA0744 | IPF14919     | -1.1 | -1.0 | -1.1 | -1.0 | unknown function                                                                |                            | orf19.9105  |
| CA3700 | IPF4859      | -1.1 | 1.0  | 1.0  | -1.0 | unknown function                                                                |                            | orf19.6276  |
| CA1703 | IPF7987      | 1.0  | -1.1 | 1.0  | -1.0 | unknown function                                                                | YGR247w                    | orf19.703   |
| CA4223 | IPF8757      | -1.2 | -1.1 | -1.0 | -1.0 | unknown function                                                                |                            | orf19.826   |
| CA1615 | IPF14540     | 1.0  | -1.0 | 1.0  | -1.0 | putative multidrug protein (by homology)                                        | YJR124c ; Missing in array | orf19.3218  |
| CA6024 | IPF615       | -1.2 | -1.1 | -1.0 | -1.0 | unknown function                                                                | YNL320w                    | orf19.7627  |
| CA0761 | IPF8267      | -1.1 | 1.1  | -1.1 | -1.0 | P-type ATPase                                                                   | YOR291w                    | orf19.9146  |
| CA5194 | IPF11756     | 1.0  | 1.2  | -1.1 | -1.0 | unknown function                                                                |                            | orf19.7006  |
| CA3513 | IPF11246     | 1.1  | 1.0  | -1.0 | -1.0 | unknown function                                                                |                            | orf19.6360  |
| CA3654 | IPF7452      | 1.2  | -1.0 | 1.2  | -1.0 | unknown function                                                                | YOR311c                    | orf19.2045  |
| CA4212 | HFM1         | 1.0  | 1.0  | -1.0 | -1.0 | DNA/RNA helicase by homology                                                    | YGL251c                    | orf19.810   |
| CA2272 | RPA43        | 1.1  | -1.0 | -1.1 | -1.0 | DNA-directed RNA polymerase I, 36 KD subunit(by homology)                       | YOR340c                    | orf19.2594  |
| CA1361 | PEP5         | -1.0 | -1.0 | -1.0 | -1.0 | vacuolar biogenesis protein (by homology)                                       | YMR231w                    | orf19.4403  |
| CA4685 | IPF9013      | -1.2 | 1.1  | -1.1 | -1.0 | unknown function                                                                | YOR030w                    | orf19.881   |
| CA4556 | IPF8044      | -1.0 | -1.0 | -1.1 | -1.0 | similar to <i>Saccharomyces cerevisiae</i> Snp1p U1 small nt                    | YIL061c                    | orf19.6866  |
| CA3023 | IPF11508     | 1.0  | 1.0  | 1.0  | -1.0 | unknown function                                                                |                            | orf19.3904  |
| CA0093 | =19980.REPEA | 1.0  | 1.0  | -1.0 | -1.0 | putative lipase (by homology)                                                   |                            | orf19.7747  |
| CA3691 | IPF4880      | 1.0  | -1.0 | -1.0 | -1.0 | unknown function                                                                |                            | orf19.6266  |
| CA0377 | IPF14356     | 1.0  | 1.0  | 1.0  | -1.0 | unknown function                                                                | YLR022c                    | orf19.2708  |
| CA2385 | RSR1.3       | -1.0 | -1.1 | -1.1 | -1.0 | GTP-binding protein, 3-prime end                                                | YGR152c                    | orf19.2614  |
| CA4858 | IPF15927.3F  | -1.0 | 1.0  | 1.0  | -1.0 | similar to <i>Saccharomyces cerevisiae</i> Tfc3p transcription factor           | YGR280c                    | orf19.3831  |
| CA0404 | LYS14        | -1.0 | -1.0 | -1.0 | -1.0 | transcription factor involved in lysine biosynthesis (by homology)              | YDR034c                    | orf19.5548  |
| CA5035 | IPF4531      | -1.1 | 1.0  | -1.0 | -1.0 | unknown function                                                                |                            | orf19.6989  |
| CA0591 | ALS3.5EOC    | 1.1  | 1.0  | 1.0  | -1.0 | agglutinin-like protein, 5-prime end                                            | YJR004c ; Missing in array | orf19.1816  |
| CA3782 | SER2         | 1.0  | -1.1 | -1.1 | -1.0 | phosphoserine phosphatase by homology to <i>S. cerevisiae</i>                   | YGR208w                    | orf19.5838  |
| CA0757 | GAP7.3EOC    | 1.2  | -1.0 | 1.0  | -1.0 | general amino-acid permease, 3-prime end                                        |                            |             |
| CA1342 | IPF11347     | 1.0  | 1.0  | 1.0  | -1.0 | unknown function                                                                |                            |             |
| CA5625 | PEL1         | -1.0 | -1.0 | -1.1 | -1.0 | CDP-diacylglycerol-serine-O-phosphatidyltransferase (by homology)               | YCL004w                    | orf19.7072  |
| CA1001 | IPF6006      | 1.0  | 1.0  | -1.0 | -1.0 | unknown function                                                                |                            | orf19.9065  |
| CA2359 | IPF8952      | -1.1 | -1.1 | -1.1 | -1.0 | similar to <i>Saccharomyces cerevisiae</i> Rpa34p nonessential                  | YJL148w                    | orf19.4896  |
| CA4017 | PBN1         | 1.0  | 1.0  | 1.0  | -1.0 | protease by homology                                                            | YCL052c                    | orf19.3447  |
| CA2753 | IPF16806     | -1.1 | -1.0 | -1.1 | -1.0 | unknown function                                                                | YPL181w                    | orf19.13062 |
| CA6164 | SNF5.5F      | -1.0 | -1.0 | 1.0  | -1.0 | Component of SWI/SNF transcription activator complex, 5-prime end (by homology) |                            | orf19.5872  |
| CA5896 | TPD3         | -1.3 | -1.1 | -1.2 | -1.0 | Ser/thr protein phosphatase (by homology)                                       | YAL016w                    | orf19.6810  |
| CA3543 | IPF5428      | 1.0  | 1.1  | -1.0 | -1.0 | unknown function                                                                |                            | orf19.6379  |
| CA0808 | SUA71        | 1.0  | 1.0  | 1.0  | -1.0 | TFIIB subunit (transcription initiation factor E)(by homology)                  |                            | orf19.3519  |
| CA5351 | IPF857       | 1.0  | -1.0 | 1.0  | -1.0 | unknown function                                                                | YFR003c                    | orf19.7227  |
| CA1096 | IPF7578      | -1.0 | -1.0 | -1.0 | -1.0 | unknown function                                                                |                            | orf19.4366  |
| CA1808 | GUK1         | -1.1 | -1.1 | -1.0 | -1.0 | Guanylate kinase (by homology)                                                  | YDR454c                    | orf19.1115  |
| CA4843 | GYP1         | -1.1 | 1.1  | 1.2  | -1.0 | GTPase activating protein (by homology)                                         | YOR070c                    | orf19.3811  |
| CA5469 | IPF298       | 1.0  | 1.0  | 1.0  | -1.0 | unknown function                                                                | YER051w                    | orf19.3281  |
| CA4399 | PRA1         | 1.0  | -1.0 | 1.1  | -1.0 | pH-regulated antigen                                                            | YOL154w                    | orf19.3111  |
| CA5591 | IPF5618      | -1.1 | -1.1 | -1.3 | -1.0 | unknown function                                                                | YGL242c                    | orf19.7109  |
| CA3569 | IPF3268      | -1.0 | -1.1 | 1.0  | -1.0 | unknown function                                                                |                            | orf19.3136  |
| CA3517 | IFA22        | -1.1 | -1.0 | 1.0  | -1.0 | Unknown function                                                                |                            | orf19.1002  |
| CA4714 | IPF5912      | -1.1 | 1.0  | 1.0  | -1.0 | unknown function                                                                | YDR352w                    | orf19.6950  |
| CA0577 | IPF16051     | 1.0  | -1.0 | 1.0  | -1.0 | unknown function                                                                |                            | orf19.3068  |
| CA5771 | IPF1104      | -1.0 | 1.1  | 1.0  | -1.0 | similar to <i>Saccharomyces cerevisiae</i> Prp28p pre-mRNA                      | YPL151c                    | orf19.5413  |



|          |            |      |      |      |      |                                                                                                      |                            |             |
|----------|------------|------|------|------|------|------------------------------------------------------------------------------------------------------|----------------------------|-------------|
| CA4046   | IPF9205    | -1.0 | 1.0  | -1.0 | -1.0 | similar to <i>Saccharomyces cerevisiae</i> Apg5p involved in                                         | YPL149w                    | orf19.3677  |
| CA3699   | IPF4860    | 1.1  | 1.0  | -1.0 | -1.0 | similarity to ribosomal protein kinases (by homology)                                                | YBR028c                    | orf19.6275  |
| CA0650   | IPF11566   | -1.1 | 1.1  | -1.0 | -1.0 | unknown function                                                                                     |                            | orf19.11    |
| CA4511   | IPF8966    | -1.0 | 1.0  | -1.0 | -1.0 | unknown function                                                                                     | YNL124w                    | orf19.8124  |
| CA5417   | NUC1       | 1.0  | 1.0  | 1.1  | -1.0 | Nuclease, mitochondrial                                                                              | YJL208c                    | orf19.967   |
| CA0451   | IPF13556   | -1.0 | -1.0 | 1.0  | -1.0 | unknown function                                                                                     |                            | orf19.8882  |
| CA5668   | IPF1261    | 1.2  | 1.1  | -1.0 | -1.0 | unknown function                                                                                     | YOL092w                    | orf19.7370  |
| CA3905   | IPF19792   | 1.1  | 1.0  | 1.0  | -1.0 | unknown function                                                                                     | YPR147c                    | orf19.11876 |
| CA3684   | IPF13613   | -1.0 | -1.0 | -1.0 | -1.0 | unknown function                                                                                     |                            | orf19.725   |
| CA0006   | IPF2072    | 1.0  | 1.0  | -1.0 | -1.0 | unknown function                                                                                     | YDR279w                    | orf19.11561 |
| 6100.2   |            | 1.0  | -1.0 | -1.1 | -1.0 |                                                                                                      |                            |             |
| CA4968   | IPF3928    | -1.0 | -1.0 | -1.0 | -1.0 | unknown function                                                                                     |                            | orf19.6503  |
| CA1604   | IPF13653   | -1.0 | 1.1  | -1.0 | -1.0 | unknown function                                                                                     | YDL043c                    | orf19.4724  |
| CA0662   | SPC97      | -1.0 | -1.1 | 1.1  | -1.0 | spindle pole body component (by homology)                                                            | YHR172w                    | orf19.708   |
| CA1550   | IPF8741.5F | 1.1  | -1.1 | 1.0  | -1.0 | unknown function, 5-prime end                                                                        |                            | orf19.4276  |
| CA1335   | TRA1       | -1.1 | 1.2  | -1.1 | -1.0 | phosphatidylinositol kinase by homology                                                              | YHR099w                    | orf19.3451  |
| CA4497   | IPF4064    | -1.1 | -1.0 | -1.0 | -1.0 | unknown function                                                                                     |                            | orf19.9419  |
| CA5881   | SSS1       | 1.0  | 1.0  | 1.0  | -1.0 | ER protein-translocase complex subunit (by homology)                                                 | YDR086c                    |             |
| CA5020   | IPF7556    | -1.0 | -1.0 | -1.1 | -1.0 | similar to <i>Saccharomyces cerevisiae</i> Pim1p mitochondrial ATP-dependent protease (I)            |                            | orf19.6973  |
| CA4419   | IFA6       | -1.1 | 1.0  | 1.0  | -1.0 | Unknown function                                                                                     |                            | orf19.5177  |
| CA4273   | CAC2       | -1.0 | 1.1  | -1.0 | -1.0 | Chromatin assembly complex, subunit p60 (by homolog                                                  | YML102w                    | orf19.6670  |
| CA1518   | IPF11040   | 1.1  | -1.0 | -1.0 | -1.0 | similar to <i>Schizosaccharomyces pombe</i> cdc5 myb-relat                                           | YMR213w                    | orf19.4799  |
| CA5136   | IPF5139    | 1.0  | -1.0 | 1.0  | -1.0 | unknown function                                                                                     |                            | orf19.13743 |
| CA2328   | MED8       | -1.1 | -1.1 | 1.1  | -1.0 | transcriptional regulation mediator (by homology)                                                    | YBR193c                    | orf19.11973 |
| CA1788   | USO1.3     | 1.2  | 1.2  | 1.1  | -1.0 | Cytoskeletal-related transport protein, Ca <sup>++</sup> binding, 3- $\mu$                           | YBL047c                    | orf19.1166  |
| CA1968   | IPF10864   | -1.1 | 1.0  | 1.1  | -1.0 | similar to <i>Saccharomyces cerevisiae</i> Rex4p member of                                           | YOL080c                    | orf19.5220  |
| CA1082   | IPF14797   | 1.0  | -1.1 | 1.0  | -1.0 | unknown function                                                                                     |                            | orf19.4818  |
| CA1520   | IPF11035   | 1.0  | 1.0  | -1.1 | -1.0 | similar to <i>Saccharomyces cerevisiae</i> Mod5p tRNA isope                                          | YOR274w                    | orf19.4801  |
| CA2441   | APM4       | 1.0  | -1.0 | 1.1  | -1.0 | AP-2 complex subunit, mu2 subunit (by homology)                                                      | YOL062c                    | orf19.2194  |
| CA5433   | SFT1       | 1.0  | 1.0  | -1.0 | -1.0 | SNARE-like protein (by homology)                                                                     | YKL006ca                   |             |
| CA3982   | SAC3       | -1.0 | -1.1 | -1.1 | -1.0 | Leucine permease transcriptional regulator                                                           | YDR159w                    | orf19.9129  |
| CA3518   | AMYG2      | -1.0 | -1.0 | -1.0 | -1.0 | glucoamylase                                                                                         |                            | orf19.8614  |
| CA4651   | IPF3121    | -1.0 | 1.0  | 1.1  | -1.0 | unknown function                                                                                     | YGR044c                    | orf19.11918 |
| CA3326   | IPF6889    | -1.0 | -1.1 | -1.1 | -1.0 | unknown function                                                                                     | YDR288w                    | orf19.2673  |
| CA0058   | IPF3770    | -1.0 | -1.0 | -1.0 | -1.0 | similar to <i>Saccharomyces cerevisiae</i> Kar3p kinesin-related protein                             |                            |             |
| CA3170   | IPF7685    | 1.0  | -1.0 | 1.0  | -1.0 | putative GTPase activating protein (by homology)                                                     | YIL044c                    | orf19.1396  |
| CA0507   | IPF11989   | -1.0 | -1.0 | 1.0  | -1.0 | unknown function                                                                                     |                            | orf19.3625  |
| CA5647   | RTF1.5EOC  | 1.0  | 1.0  | -1.1 | -1.0 | Nuclear protein regulating DNA binding properties of TATA Binding Protein, 5-prime end (by homology) |                            |             |
| CA2132   | IPF5865    | -1.0 | 1.0  | 1.0  | -1.0 | unknown function                                                                                     | YLR394w                    | orf19.5212  |
| CA2901   | PUS1       | 1.1  | -1.1 | -1.0 | -1.0 | pseudouridine synthase 1 (by homology)                                                               | YPL212c ; Missing in array | orf19.3477  |
| E coli 3 |            | 1.0  | 1.0  | -1.0 | -1.0 |                                                                                                      |                            |             |
| CA2549   | RPD31      | -1.1 | -1.0 | -1.0 | -1.0 | histone deacetylase B (by homology)                                                                  |                            | orf19.2834  |
| CA4231   | SNP3       | 1.1  | 1.1  | 1.0  | -1.0 | snRNP-related protein (by homology)                                                                  | YBL026w                    | orf19.514   |
| CA1346   | KRE2.3F    | 1.1  | -1.1 | -1.0 | -1.0 | secretory pathway protein, 3-prime end                                                               |                            |             |
| CA5579   | IPF5661    | 1.0  | 1.1  | 1.2  | -1.0 | unknown function                                                                                     |                            | orf19.7125  |
| CA5226   | RIM15      | 1.0  | -1.2 | -1.1 | -1.0 | Protein kinase involved in the RIM pathway (by homolog                                               | YFL033c                    | orf19.7044  |
| CA2149   | IPF10761   | 1.0  | 1.0  | 1.0  | -1.0 | unknown function                                                                                     |                            | orf19.6021  |
| CA3195   | IPF3426    | -1.0 | -1.1 | -1.0 | -1.0 | unknown function                                                                                     | YOR047c                    | orf19.6173  |
| CA1582   | CLN21      | -1.0 | -1.0 | -1.1 | -1.0 | G1 cyclin (by homology)                                                                              | YMR199w                    | orf19.6028  |

|        |              |      |      |      |      |                                                                                        |                            |             |
|--------|--------------|------|------|------|------|----------------------------------------------------------------------------------------|----------------------------|-------------|
| CA1738 | MGE1         | 1.1  | 1.0  | 1.1  | -1.0 | heat shock protein (by homology)                                                       | YOR232w                    | orf19.2524  |
| CA3441 | MST1         | -1.1 | -1.0 | -1.1 | -1.0 | mitochondrial threonyl tRNA synthetase [Candida albica                                 | YKL194c                    | orf19.2984  |
| CA3948 | RPN9         | -1.2 | -1.1 | -1.0 | -1.0 | 26S proteasome regulatory particle (by homology)                                       | YDR427w                    | orf19.1993  |
| Int 5  |              | -1.0 | -1.0 | -1.0 | -1.0 |                                                                                        |                            |             |
| CA2913 | IPF11205     | -1.0 | -1.0 | 1.1  | -1.0 | unknown function                                                                       |                            | orf19.4513  |
| CA4264 | IPF2280      | -1.1 | -1.0 | 1.0  | -1.0 | unknown function                                                                       |                            | orf19.6658  |
| CA5628 | MAC1         | -1.0 | -1.0 | 1.0  | -1.0 | putative metal-binding transcriptional regulator (by homology)                         |                            | orf19.7068  |
| CA2511 | IPF1474      | 1.0  | 1.0  | -1.0 | -1.0 | myosin-like protein                                                                    |                            | orf19.306   |
| CA3949 | SIR21        | -1.0 | -1.0 | -1.0 | -1.0 | regulatory protein (by homology)                                                       |                            | orf19.9544  |
| CA1200 | IPF10223     | 1.0  | 1.1  | 1.1  | -1.0 | putative serine/threonine kinase                                                       | YJL187c                    | orf19.12331 |
| CA3881 | GCR3         | -1.3 | -1.0 | -1.2 | -1.0 | Large subunit of the nuclear cap-binding protein comple                                | YMR125w ; Missing in array | orf19.387   |
| CA1340 | VPS4         | -1.1 | -1.0 | -1.1 | -1.0 | vacuolar sorting protein by homology to S. cerevisiae                                  | YPR173c                    | orf19.4339  |
| CA2248 | IPF11469     | 1.1  | -1.0 | -1.0 | -1.0 | unknown function                                                                       |                            | orf19.9902  |
| CA2690 | PTR2.EXON2   | 1.0  | 1.0  | 1.1  | -1.0 | Peptide transporter for di- and tripeptides, exon 2                                    |                            |             |
| CA2743 | CKB21        | 1.0  | 1.1  | 1.2  | -1.0 | Casein kinase II, beta subunit (by homology)                                           | YGL019w                    | orf19.2102  |
| CA3821 | IPF6990      | -1.0 | -1.0 | 1.1  | -1.0 | unknown function                                                                       | YGL114w                    | orf19.5770  |
| CA5880 | IPF12074     | -1.0 | -1.1 | -1.1 | -1.0 | unknown function                                                                       | YMR282c                    | orf19.6829  |
| CA1895 | PRE7.EXON2   | -1.0 | 1.0  | 1.1  | -1.0 | subunit of 20S proteasome, exon 2 (by homology)                                        |                            |             |
| CA0400 | IPF7423.3EOC | -1.0 | 1.0  | 1.1  | -1.0 | similar to Saccharomyces cerevisiae Spo22 involved in sporulation, 3-prime end         |                            | orf19.6223  |
| CA1076 | IPF19721     | 1.0  | 1.0  | 1.0  | -1.0 | similar to Saccharomyces cerevisiae Lte1p GDP/GTP e                                    | YAL024c                    | orf19.2239  |
| CA1540 | IPF1047      | 1.0  | -1.0 | 1.0  | -1.0 | unknown function                                                                       | YMR310c                    | orf19.4563  |
| CA5139 | IPF1027      | -1.0 | 1.0  | 1.1  | -1.0 | unknown function                                                                       | YOR371c                    | orf19.4577  |
| CA2831 | IPF15706     | -1.1 | -1.0 | -1.0 | -1.0 | unknown function                                                                       |                            | orf19.4783  |
| CA2575 | SEC31        | 1.0  | 1.2  | -1.0 | -1.0 | Component of the COPII coat of ER-golgi vesicles (by h                                 | YDL195w                    | orf19.6217  |
| CA3047 | MSE1         | -1.0 | -1.0 | -1.1 | -1.0 | Mitochondrial glutamyl-tRNA synthetase (by homology)                                   | YOL033w                    | orf19.9953  |
| CA5719 | IPF2441      | 1.0  | -1.0 | -1.0 | -1.0 | unknown function                                                                       | YER126c                    | orf19.7424  |
| CA4398 | ZRT1         | 1.0  | 1.0  | -1.0 | -1.0 | high-affinity zinc transport protein (by homology)                                     |                            | orf19.3112  |
| CA4402 | MGT1         | 1.0  | 1.0  | 1.0  | -1.0 | O6-methylguanine DNA repair methyltransferase (by ho                                   | YDL200c                    | orf19.3108  |
| CA3311 | IPF8809      | -1.0 | -1.1 | -1.1 | -1.0 | unknown function                                                                       | YMR009w                    | orf19.2306  |
| CA4023 | FRP5         | -1.0 | 1.0  | 1.1  | -1.0 | member of the FRP family of proteins related to Yarrowia lipolytica glyoxylate pathway |                            | orf19.3440  |
| CA4596 | MRE11        | 1.0  | -1.0 | -1.0 | -1.0 | DNA repair and meiotic recombination protein (by homo                                  | YMR224c                    | orf19.6915  |
| CA6008 | IPF647       | -1.0 | -1.0 | -1.0 | -1.0 | unknown function                                                                       |                            | orf19.7609  |
| CA4393 | IPF12300     | -1.0 | 1.0  | -1.0 | -1.0 | unknown function                                                                       |                            | orf19.3120  |
| CA4194 | PTR3         | -1.1 | -1.0 | -1.0 | -1.0 | transcriptional regulator (by homology)                                                | YFR029w                    | orf19.4535  |
| CA0020 | IPF7046      | 1.1  | 1.0  | -1.0 | -1.0 | unknown function                                                                       | YHR052w                    | orf19.124   |
| CA0257 | IPF10079     | 1.1  | 1.1  | 1.0  | -1.0 | unknown function                                                                       |                            | orf19.2280  |
| CA1696 | ASM4         | -1.1 | -1.1 | -1.1 | -1.0 | similar to Saccharomyces cerevisiae Asm4p suppressor                                   | YDL088c                    | orf19.5040  |
| CA1059 | TRP2         | -1.1 | -1.0 | -1.1 | -1.0 | anthranilate synthase component I (by homology)                                        | YER090w                    | orf19.10080 |
| CA2513 | SNG1         | 1.0  | 1.0  | 1.0  | -1.0 | Involved in nitroguanidine resistance (by homology)                                    | YGR197c                    | orf19.308   |
| CA3723 | DPH2         | 1.0  | -1.0 | -1.0 | -1.0 | Diphtheria toxin resistance protein (by homology)                                      | YKL191w                    | orf19.4173  |
| CA1292 | SRB2.3       | 1.0  | -1.0 | 1.1  | -1.0 | DNA-directed RNA polymerase II holoenzyme and Korn                                     | YHR041c                    |             |
| CA1399 | IPF8069      | 1.0  | 1.1  | 1.0  | -1.0 | unknown function                                                                       | YHR121w                    | orf19.3698  |
| CA3026 | 11499.REPEA  | 1.1  | -1.0 | -1.0 | -1.0 | unknown function                                                                       |                            | orf19.11382 |
| CA4327 | IPF2091      | 1.1  | -1.1 | -1.0 | -1.0 | unknown function                                                                       | YGR102c                    | orf19.4092  |
| CA1804 | TAF17        | 1.1  | 1.0  | -1.0 | -1.0 | TFIID and SAGA subunit (by homology)                                                   | YMR236w                    | orf19.1111  |
| CA2293 | IPF9748      | 1.0  | 1.0  | -1.0 | -1.0 | unknown function                                                                       | YJL049w                    | orf19.746   |
| CA0768 | COX19        | 1.0  | -1.0 | 1.0  | -1.0 | Protein required for cytochrome c oxidase activity (by                                 | YLL018ca                   | orf19.12432 |
| CA5632 | IPF480       | -1.1 | -1.1 | -1.1 | -1.0 | unknown function                                                                       | YGR024c                    | orf19.7063  |
| CA5085 | RPS22.EXON2  | 1.0  | -1.0 | 1.0  | -1.0 | ribosomal protein S15a, exon 2 (by homology)                                           |                            |             |

|        |              |      |      |      |      |                                                                                          |                            |             |
|--------|--------------|------|------|------|------|------------------------------------------------------------------------------------------|----------------------------|-------------|
| CA2451 | IFB2         | -1.0 | -1.1 | -1.0 | -1.0 | unknown function                                                                         |                            | orf19.5509  |
| CA0811 | IPF17625     | -1.0 | 1.0  | 1.0  | -1.0 | putative cell wall protein of the PIR family                                             |                            | orf19.1920  |
| CA0275 | NTA1         | 1.0  | 1.0  | 1.1  | -1.0 | Amino-terminal amidase (by homology)                                                     | YJR062c                    | orf19.8470  |
| CA0496 | IPF11644     | -1.0 | -1.0 | 1.0  | -1.0 | unknown function                                                                         | YPR023c                    | orf19.2660  |
| CA2624 | ARG81.3EOC   | 1.1  | 1.0  | 1.0  | -1.0 | transcription factor possibly involved in arginine metabolism, 3-prime end (by homology) |                            |             |
| CA4310 | IPF2125      | 1.0  | 1.0  | 1.0  | -1.0 | unknown function                                                                         |                            | orf19.4116  |
| CA1711 | POX18        | 1.0  | -1.0 | -1.0 | -1.0 | Lipid-transfer protein (by homology)                                                     |                            | orf19.10841 |
| CA2116 | SNG4         | 1.0  | -1.0 | 1.1  | -1.0 | Drug transporter (by homology)                                                           |                            | orf19.1332  |
| CA3328 | IPF10564     | -1.0 | 1.1  | 1.0  | -1.0 | unknown function                                                                         |                            | orf19.2671  |
| CA5876 | IPF12082.5F  | -1.1 | 1.1  | -1.3 | -1.0 | bumetanide-sensitive Na-K-Cl cotransport protein, 5-prii                                 | YBR235w                    | orf19.6833  |
| CA1499 | IPF6521.3EOC | 1.1  | 1.0  | -1.0 | -1.0 | similar to <i>Saccharomyces cerevisiae</i> Tao3p transcriptional activator, 3-prime end  |                            |             |
| CA3721 | IPF6186      | -1.0 | -1.0 | -1.1 | -1.0 | unknown function                                                                         | Missing in array           | orf19.11647 |
| CA2324 | CDC46        | 1.0  | 1.0  | 1.0  | -1.0 | cell division control protein (by homology)                                              | YLR274w                    | orf19.5487  |
| CA4743 | IPF4491      | -1.0 | -1.0 | -1.1 | -1.0 | unknown function                                                                         | YER083c                    | orf19.4839  |
| CA0991 | IPF11065     | -1.0 | -1.1 | 1.0  | -1.0 | unknown function                                                                         | YIL006w                    | orf19.8971  |
| CA4877 | IPF1667      | -1.1 | -1.1 | -1.1 | -1.0 | unknown function                                                                         | YJR054w                    | orf19.6563  |
| CA3815 | CYP7         | 1.0  | -1.0 | 1.0  | -1.0 | peptidyl-prolyl cis-trans isomerase cyp7 (ppiase)                                        | YJR032w                    | orf19.2499  |
| CA2379 | IPF4073      | -1.1 | 1.0  | -1.2 | -1.0 | similar to <i>Saccharomyces cerevisiae</i> CaPds5p regulatio                             | YMR076c                    | orf19.2216  |
| CA5150 | FMS1         | -1.0 | 1.0  | 1.1  | -1.0 | Similar to corticosteroid-binding protein CBP1 (by homo                                  | YMR020w                    | orf19.4589  |
| CA0628 | IPF3878      | -1.0 | -1.0 | 1.0  | -1.0 | unknown function                                                                         | YLR221c                    | orf19.773   |
| CA3763 | IPF13070     | 1.0  | 1.0  | 1.1  | -1.0 | unknown function                                                                         |                            | orf19.2906  |
| CA2966 | RPC34        | 1.1  | 1.0  | -1.0 | -1.0 | DNA-directed RNA polymerase III (by homology)                                            | YNR003c                    | orf19.5608  |
| CA0049 | IPF3908      | -1.2 | -1.0 | -1.2 | -1.0 | unknown function                                                                         | YPR090w                    | orf19.757   |
| CA4281 | IPF2314      | -1.0 | -1.0 | -1.0 | -1.0 | unknown function                                                                         |                            | orf19.6679  |
| CA5753 | FKH1         | 1.1  | 1.1  | 1.0  | -1.0 | Fork head protein type transcription factor                                              | YNL068c                    | orf19.5389  |
| CA1192 | IPF11926     | 1.1  | -1.0 | -1.0 | -1.0 | unknown function                                                                         |                            |             |
| CA0479 | IPF16191     | -1.0 | -1.0 | -1.0 | -1.0 | similar to <i>Saccharomyces cerevisiae</i> Rad59p recombinε                              | YDL059c                    | orf19.2630  |
| CA5710 | OAC1         | 1.0  | 1.1  | 1.0  | -1.0 | Mitochondrial oxaloacetate transport protein (by homolo                                  | YKL120w ; Missing in array | orf19.7411  |
| CA4773 | IPF3340      | 1.1  | 1.0  | -1.0 | -1.0 | unknown function                                                                         | YDR196c                    | orf19.4005  |
| CA3969 | IPF9379      | -1.0 | -1.0 | -1.0 | -1.0 | unknown function                                                                         |                            | orf19.1430  |
| CA6056 | IPF4955      | 1.1  | -1.0 | 1.1  | -1.0 | similar to <i>Saccharomyces cerevisiae</i> Mrpl25p ribosomal                             | YGR076c                    | orf19.7675  |
| CA3442 | IPF11326     | -1.1 | -1.1 | -1.1 | -1.0 | similar to <i>Saccharomyces cerevisiae</i> (by homology)                                 | YLR418c                    | orf19.2983  |
| CA3670 | IPF13934     | -1.1 | 1.0  | 1.0  | -1.0 | unknown function                                                                         |                            | orf19.6458  |
| CA5432 | EBP5         | 1.0  | -1.1 | -1.1 | -1.0 | NADPH dehydrogenase (by homology)                                                        | YPL171c                    | orf19.3234  |
| CA0475 | IPF2580      | -1.0 | -1.1 | -1.2 | -1.0 | unknown function                                                                         | YOR140w                    | orf19.8085  |
| CA4092 | DBP8         | -1.0 | -1.0 | -1.0 | -1.0 | DEAD box protein ATP-dependent RNA helicase (by ho                                       | YHR169w                    | orf19.6652  |
| CA4876 | RNH35        | 1.0  | -1.0 | -1.1 | -1.0 | RNase H (by homology)                                                                    | YNL072w                    | orf19.6562  |
| CA4245 | IPF4303      | 1.0  | -1.1 | -1.1 | -1.0 | unknown function                                                                         |                            | orf19.532   |
| CA2965 | IPF13174     | 1.0  | 1.1  | 1.0  | -1.0 | unknown function                                                                         |                            | orf19.5609  |
| CA0328 | IPF15217.3F  | -1.1 | -1.0 | 1.1  | -1.0 | WD-repeat protein, 3-prime end (by homology)                                             | YCR072c                    | orf19.3778  |
| CA2491 | IPF7221      | 1.1  | -1.0 | 1.0  | -1.0 | unknown function                                                                         |                            | orf19.4046  |
| CA2130 | RPS27A       | 1.0  | 1.0  | 1.1  | -1.0 | ribosomal protein S27.e (by homology)                                                    |                            |             |
| CA5159 | CAP2         | 1.1  | 1.0  | -1.0 | -1.0 | F-actin capping protein, beta subunit (by homology)                                      | YIL034c                    | orf19.4597  |
| CA0303 | IPF17507     | 1.0  | 1.0  | -1.0 | -1.0 | putative glutathione S-transferase (by homology)                                         |                            | orf19.8339  |
| CA2711 | TFB3         | 1.0  | -1.0 | -1.0 | -1.0 | Transcription/repair factor (by homology)                                                | YDR460w                    | orf19.8198  |
| CA0332 | FEN2         | 1.1  | -1.2 | -1.1 | -1.0 | allantoate permease transporter (by homology)                                            | YCR028c                    | orf19.12981 |
| CA3243 | IPF7489      | -1.1 | -1.1 | -1.1 | -1.0 | unknown function                                                                         |                            | orf19.4680  |
| CA2332 | IPF4792      | -1.1 | -1.1 | -1.2 | -1.0 | unknown Function                                                                         |                            | orf19.11979 |
| CA0251 | IPF9146      | 1.0  | -1.1 | -1.1 | -1.0 | unknown function                                                                         |                            | orf19.13622 |

|           |             |      |      |      |      |                                                                                    |                  |             |
|-----------|-------------|------|------|------|------|------------------------------------------------------------------------------------|------------------|-------------|
| CA5620    | IPF511      | 1.0  | 1.0  | -1.0 | -1.0 | unknown function                                                                   |                  | orf19.7078  |
| CA2487    | PIK1        | -1.0 | 1.0  | -1.0 | -1.0 | phosphatidylinositol 4-kinase                                                      | YNL267w          | orf19.10711 |
| CA1228    | IPF16081    | -1.0 | -1.1 | -1.0 | -1.0 | unknown function                                                                   | YDL105w          | orf19.4161  |
| CA5485    | RAD1.53F    | -1.0 | 1.1  | -1.0 | -1.0 | UV endonuclease, component of the nucleotide excision repairosome, internal fragme |                  | orf19.5319  |
| CA2365    | CKS1        | 1.1  | -1.0 | 1.0  | -1.0 | cyclin-dependent kinases regulatory subunit (by homolo                             | YBR135w          | orf19.1282  |
| CA1892    | IPF10197    | -1.0 | -1.0 | 1.0  | -1.0 | Similarity to transcription factors                                                |                  | orf19.2753  |
| CA2707    | IPF11003    | -1.0 | -1.1 | -1.1 | -1.0 | by homology pre-mrna splicing factor                                               | YJL203w          | orf19.4659  |
| CA4337    | IPF2071     | -1.1 | -1.0 | -1.1 | -1.0 | unknown function                                                                   |                  | orf19.4079  |
| CA3812    | GSL22       | 1.1  | 1.0  | 1.2  | -1.0 | 1,3-beta-D-glucan synthase subunit                                                 |                  | orf19.2495  |
| CA3900    | IPF10092    | -1.0 | 1.1  | -1.0 | -1.0 | unknown function                                                                   | YDL167c          | orf19.5071  |
| CA4295    | MNN7        | -1.0 | -1.0 | -1.1 | -1.0 | putative Golgi alpha-1,2-mannosyltransferase (by homology)                         |                  | orf19.6692  |
| CA6113    | IPF100.3    | -1.0 | 1.0  | -1.0 | -1.0 | zinc finger protein, 3-prime end (by homology)                                     |                  | orf19.5940  |
| CA3555    | IPF7766     | 1.0  | -1.0 | 1.0  | -1.0 | unknown function                                                                   |                  | orf19.3884  |
| CA4208    | CHS5.5EOC   | -1.0 | -1.0 | -1.0 | -1.0 | chitin biosynthesis, 5-prime end                                                   |                  |             |
| CA4329    | VMA21       | 1.1  | 1.0  | -1.0 | -1.0 | Vacuolar H+-ATPase assembly (by homology)                                          | YGR105w          |             |
| CA5813    | IPF2522     | 1.0  | -1.0 | 1.0  | -1.0 | unknown function                                                                   | YOL125w          | orf19.7460  |
| CA6144    | PKC1        | -1.1 | -1.1 | -1.1 | -1.0 | Ser/thr protein kinase C                                                           | YBL105c          | orf19.5901  |
| CA4896    | IPF18160    | 1.1  | 1.0  | 1.0  | -1.0 | unknown function                                                                   | YDR162c          | orf19.6588  |
| CA2492    | IPF7224     | -1.0 | 1.1  | 1.1  | -1.0 | putative telomere elongation protein (by homology)                                 | YDR206w          | orf19.4045  |
| CA2694    | IPF9171     | -1.1 | 1.0  | -1.0 | -1.0 | unknown function                                                                   |                  | orf19.10248 |
| CA5910    | IPF5964     | 1.0  | -1.0 | 1.1  | -1.0 | unknown function                                                                   |                  | orf19.6795  |
| CA6119    | ARV1        | -1.0 | 1.0  | 1.0  | -1.0 | involved in sterol uptake and distribution into the plasm                          | YLR242c          | orf19.5931  |
| CA3573    | RFA2        | -1.1 | -1.0 | -1.1 | -1.0 | DNA replication factor by homology to <i>S. cerevisiae</i>                         | YNL312w          | orf19.2267  |
| CA3460    | CFL1        | 1.1  | -1.0 | 1.1  | -1.0 | ferric reductase                                                                   |                  | orf19.1263  |
| CA2936    | IPF8326     | 1.0  | -1.0 | 1.0  | -1.0 | similar to <i>Saccharomyces cerevisiae</i> Rnc1p endo-exon                         | YKR056w          | orf19.3327  |
| CA4486    | IPF9162     | 2.3  | -1.1 | -1.1 | -1.0 | unknown function                                                                   | YLR271w          | orf19.1877  |
| CA1497    | IPF9683     | -1.0 | -1.0 | -1.0 | -1.0 | unknown function                                                                   |                  | orf19.3644  |
| CA2058    | IPF7848     | 1.1  | 1.0  | 1.0  | -1.0 | unknown function                                                                   |                  | orf19.2558  |
| CA2512    | HF11        | -1.0 | -1.0 | -1.1 | -1.0 | Putative transcriptional coactivator (by homology)                                 | YPL254w          | orf19.307   |
| CA0358    | IPF17488.5F | -1.0 | -1.1 | -1.0 | -1.0 | unknown function, 5-prime end                                                      |                  | orf19.1818  |
| CA4614    | IPF7952     | -1.1 | -1.0 | 1.1  | -1.0 | unknown function                                                                   |                  | orf19.3305  |
| CA5438    | IPF223      | 1.0  | 1.0  | -1.2 | -1.0 | unknown function                                                                   | YDR128w          | orf19.3241  |
| CA4737    | SKI3        | 1.0  | 1.0  | -1.0 | -1.0 | antiviral protein                                                                  | YPR189w          | orf19.4848  |
| CA0365    | IPF15177    | -1.0 | -1.0 | -1.1 | -1.0 | Unknown function                                                                   |                  | orf19.750   |
| CA3187    | IPF17094    | 1.0  | -1.0 | -1.1 | -1.0 | unknown function                                                                   | YPL183c          | orf19.2143  |
| CA2616    | IPF3540     | 1.0  | 1.0  | 1.0  | -1.0 | unknown function                                                                   |                  | orf19.2814  |
| CA4359    | IPF6054     | -1.0 | -1.0 | -1.1 | -1.0 | unknown function                                                                   | YOR205c          | orf19.6736  |
| CA3738    | IPF5526     | 1.1  | -1.0 | -1.0 | -1.0 | unknown function                                                                   | YGR058w          | orf19.2180  |
| CA5299    | IPF2190     | 1.0  | 1.0  | 1.0  | -1.0 | putative serine/threonine protein kinase (by homology)                             | YPL236c          | orf19.7164  |
| CA5670    | IPF1266     | -1.1 | -1.1 | -1.1 | -1.0 | Probable transcription factor                                                      |                  | orf19.7372  |
| CA1151    | IPF10459    | -1.0 | 1.0  | 1.0  | -1.0 | unknown function                                                                   |                  | orf19.102   |
| CA3687    | IPF4889     | 1.1  | 1.0  | 1.0  | -1.0 | unknown function                                                                   |                  | orf19.6264  |
| CA2019    | IPF3409     | -1.1 | -1.1 | -1.1 | -1.0 | unknown function                                                                   | YLR361c          | orf19.8463  |
| CA0155    | RPT6        | -1.1 | 1.0  | -1.1 | -1.0 | 26S proteasome regulatory subunit (by homology)                                    | YGL048c          | orf19.11075 |
| CA3468    | IPF6318     | -1.0 | -1.1 | -1.1 | -1.0 | beta-glucosidase (by homology)                                                     |                  | orf19.1664  |
| LacZ 3end |             | -1.0 | 1.0  | 1.0  | -1.0 |                                                                                    |                  |             |
| CA0158    | F19178.5EOC | 1.0  | -1.0 | 1.0  | -1.0 | unknown function, 3-prime end                                                      | Missing in array | orf19.1073  |
| CA3693    | IPF4874     | -1.1 | -1.1 | -1.1 | -1.0 | unknown function                                                                   | YBR007c          | orf19.6268  |
| CA2948    | GDS1        | -1.1 | -1.1 | -1.1 | -1.0 | nam9-1 suppressor (by homology)                                                    | YOR355w          | orf19.1963  |

|        |             |      |      |      |      |                                                                                |                            |             |
|--------|-------------|------|------|------|------|--------------------------------------------------------------------------------|----------------------------|-------------|
| CA0732 | IPF9000     | 1.0  | 1.0  | -1.0 | -1.0 | unknown function                                                               |                            | orf19.4636  |
| CA0187 | IPF15734    | -1.0 | 1.0  | -1.1 | -1.0 | unknown function                                                               |                            |             |
| CA2390 | CET1        | -1.0 | -1.0 | -1.0 | -1.0 | mRNA 5'-triphosphatase (capping enzyme, beta subunit)                          | YPL228w ; Missing in array | orf19.2609  |
| CA1838 | IPF5777     | 1.1  | 1.1  | 1.1  | -1.0 | unknown function                                                               | YER182w                    | orf19.3963  |
| CA2179 | FAB1        | -1.1 | 1.0  | -1.3 | -1.0 | phosphatidylinositol 3-phosphate 5-kinase (by homology)                        | YFR019w                    | orf19.9088  |
| CA4774 | IPF3341     | -1.1 | -1.0 | -1.1 | -1.0 | Unknown function                                                               | YHR063c                    | orf19.4006  |
| CA3538 | ATP10       | -1.1 | -1.1 | -1.2 | -1.0 | F1F0 ATPase complex assembly protein (by homology)                             | YLR393w                    | orf19.6374  |
| CA0190 | IPF14773    | -1.1 | 1.0  | -1.0 | -1.0 | unknown function                                                               | YBR005w                    | orf19.11070 |
| CA0749 | HAP5        | -1.0 | -1.0 | -1.0 | -1.0 | CCAAT-binding factor subunit (by homology)                                     | YOR358w                    | orf19.1973  |
| CA4725 | PET100      | -1.0 | 1.0  | 1.0  | -1.0 | cytochrome-c oxidase assembly protein (by homology)                            | YDR079w                    |             |
| CA2098 | IPF11487    | -1.0 | -1.1 | -1.1 | -1.0 | unknown function                                                               | YMR098c                    | orf19.2387  |
| CA2222 | CCR4        | -1.0 | 1.0  | -1.0 | -1.0 | glucose-repressible alcohol dehydrogenase                                      | YAL021c                    | orf19.5101  |
| CA2086 | IPF3392     | -1.1 | 1.1  | 1.1  | -1.0 | unknown function                                                               | YFL013c                    | orf19.835   |
| CA2057 | SEC65       | 1.1  | -1.1 | -1.1 | -1.0 | Recognition particle subunit (by homology)                                     | YML105c                    | orf19.2557  |
| CA5566 | PET18       | -1.0 | 1.0  | 1.0  | -1.0 | Putative transcriptional regulator (by homology)                               | YCR020c                    | orf19.7330  |
| CA5589 | IPF5621     | -1.1 | -1.1 | -1.0 | -1.0 | unknown function                                                               | YIL065c                    | orf19.7111  |
| CA3604 | IPF12942    | 1.0  | -1.1 | -1.1 | -1.0 | delta-12 fatty acid desaturase (by homology)                                   |                            | orf19.4933  |
| CA5422 | IPF1588     | 1.0  | 1.0  | -1.0 | -1.0 | unknown function                                                               | YBR228w                    | orf19.972   |
| CA3785 | IPF19788    | -1.0 | 1.0  | -1.1 | -1.0 | similar to <i>Saccharomyces cerevisiae</i> Sxm1p putative beta                 | YDR395w                    | orf19.5834  |
| CA0072 | IPF19283.3F | -1.1 | -1.0 | -1.1 | -1.0 | unknown function, 3-prime end                                                  | Missing in array           | orf19.625   |
| CA5737 | JEN1        | 1.0  | 1.0  | -1.0 | -1.0 | Carboxylic acid transporter protein (by homology)                              | YKL217w                    | orf19.7447  |
| CA5378 | MPR1        | 1.1  | 1.0  | 1.1  | -1.0 | 26S proteasome regulatory subunit by homology                                  | YFR004w                    | orf19.7264  |
| CA5874 | CTA23       | 1.1  | 1.0  | 1.1  | -1.0 | transcriptional activation                                                     | Missing in array           | orf19.7544  |
| CA3803 | IPF12407    | 1.1  | 1.0  | -1.0 | -1.0 | unknown function                                                               |                            | orf19.2481  |
| CA1284 | IPF10168.3  | 1.0  | 1.0  | 1.0  | -1.0 | unknown function, 3-prime end                                                  | YJR089w                    | orf19.8257  |
| CA5401 | FET35.3     | -1.1 | -1.0 | -1.0 | -1.0 | Cell surface ferroxidase, high affinity, 3-prime end (by homology)             |                            | orf19.943   |
| CA4035 | IPF12040    | 1.0  | -1.0 | -1.1 | -1.0 | unknown function                                                               | YPL165c                    | orf19.3665  |
| CA0090 | UBP13       | -1.1 | 1.0  | -1.1 | -1.0 | ubiquitin carboxyl-terminal hydrolase (by homology)                            | YER098w                    | orf19.2026  |
| CA2908 | SUV3        | -1.1 | -1.1 | -1.0 | -1.0 | ATP-dependent RNA helicase, mitochondrial (by homology)                        | YPL029w                    | orf19.4519  |
| CA4307 | IPF20013    | 1.0  | 1.0  | 1.0  | -1.0 | Unknown function                                                               | YNL217w                    | orf19.6707  |
| CA4352 | IPF3642     | 1.0  | 1.1  | -1.0 | -1.0 | Unknown function                                                               | YER161c                    | orf19.6726  |
| CA3609 | IPF3856     | -1.1 | -1.0 | -1.1 | -1.0 | similar to <i>Saccharomyces cerevisiae</i> Png1P peptide:N- $\zeta$            | YPL096w                    | orf19.26    |
| CA2464 | IPF8727     | -1.0 | -1.0 | -1.0 | -1.0 | unknown function                                                               |                            | orf19.1794  |
| CA3705 | MSH6        | -1.1 | 1.0  | 1.0  | -1.0 | DNA mismatch repair protein by homology                                        | YDR097c                    | orf19.4945  |
| CA3930 | LPT1.EXON2  | 1.1  | -1.0 | 1.0  | -1.0 | protein-tyrosine-phosphatase, exon 2                                           | YPR073c                    | orf19.5104  |
| CA2358 | IPF8953     | 1.0  | -1.0 | 1.0  | -1.0 | unknown function                                                               |                            | orf19.4895  |
| CA3476 | NUP2.3EOC   | -1.0 | -1.1 | -1.1 | -1.0 | nucleoporin involved in nuclear protein export, 3-prime                        | YIL063c                    | orf19.3583  |
| CA3742 | IFM3        | -1.1 | -1.1 | -1.1 | -1.0 | 2-hydroxyacid dehydrogenase by homology, Glycerate-formate-dehydrogenases-like |                            | orf19.2176  |
| CA4195 | CYS4        | -1.2 | -1.0 | 1.1  | -1.0 | cystathionine beta-synthase (by homology)                                      | YGR155w                    | orf19.4536  |
| CA4967 | IPF3927     | -1.1 | -1.1 | -1.1 | -1.0 | unknown function                                                               | YMR075w                    | orf19.6506  |
| CA3749 | IPF7389     | 1.0  | -1.0 | -1.0 | -1.0 | unknown function                                                               |                            | orf19.3429  |
| CA5201 | IPF2349     | -1.0 | -1.2 | -1.2 | -1.0 | similar to human sphingomyelin                                                 | YDR452w                    | orf19.7016  |
| CA0651 | ALK8        | 1.1  | 1.0  | 1.0  | -1.0 | n-alkane inducible cytochrome P-450 (by homology)                              |                            | orf19.10    |
| CA1210 | IPF7030     | -1.0 | 1.1  | -1.0 | -1.0 | unknown function                                                               | YBR103w                    | orf19.7778  |
| CA3233 | MYO1        | -1.1 | -1.0 | -1.1 | -1.0 | myosin-1 isoform (type II myosin) heavy chain (by homology)                    | YHR023w                    | orf19.6294  |
| CA2165 | IPF17024    | -1.0 | -1.0 | -1.1 | -1.0 | unknown function                                                               | YGL126w ; Missing in array | orf19.5291  |
| CA2532 | PRP9        | -1.1 | -1.0 | -1.1 | -1.0 | pre-mRNA splicing factor (snRNA-associated)                                    | YDL030w                    | orf19.3178  |
| CA5534 | IPF2843     | 1.1  | 1.0  | 1.1  | -1.0 | unknown function                                                               | YOR329c                    | orf19.7295  |
| CA5663 | IPF1251     | -1.0 | -1.0 | -1.0 | -1.0 | unknown function                                                               | YIL097w                    | orf19.7365  |



|         |             |      |      |      |      |                                                                                               |                  |             |
|---------|-------------|------|------|------|------|-----------------------------------------------------------------------------------------------|------------------|-------------|
| CA5454  | IPF257.3    | -1.1 | 1.0  | -1.1 | -1.0 | member of the FRP family of proteins related to <i>Yarrowia lipolytica</i> glyoxylate pathway |                  | orf19.3261  |
| CA6012  | HCR1        | -1.0 | 1.0  | -1.2 | -1.0 | putative translation initiation factor 3 subunit (by homolo                                   | YLR192c          | orf19.7613  |
| CA3133  | IPF16939    | 1.1  | -1.0 | 1.1  | -1.0 | unknown function                                                                              |                  | orf19.1364  |
| CA5000  | IPF2023     | -1.0 | 1.0  | -1.1 | -1.0 | unknown function                                                                              | YCR095c          | orf19.5247  |
| CA5047  | IPF4504     | 1.1  | -1.0 | -1.1 | -1.0 | unknown function                                                                              |                  | orf19.7002  |
| CA3970  | IPF6497     | -1.1 | -1.0 | -1.1 | -1.0 | unknown function                                                                              | YDL013w          | orf19.1542  |
| CA5875  | IPF324.3    | 1.0  | 1.1  | 1.0  | -1.0 | unknown function, , 3-prime end                                                               |                  | orf19.7545  |
| CA5192  | HOK         | 1.0  | 1.1  | 1.1  | -1.0 | unknown function                                                                              |                  | orf19.7004  |
| CA2576  | IPF7432     | 1.1  | 1.0  | 1.1  | -1.0 | unknown function                                                                              |                  | orf19.6219  |
| CA2360  | IPF8951     | 1.0  | 1.0  | 1.0  | -1.0 | unknown function                                                                              | YJL145w          | orf19.4897  |
| CA1998  | IPF6605     | -1.0 | -1.0 | -1.0 | -1.0 | unknown function                                                                              | YDR165w          | orf19.6477  |
| CA0388  | IPF14468    | -1.0 | 1.0  | 1.2  | -1.0 | unknown function                                                                              | YGR089w          | orf19.1907  |
| CA3854  | IPF4649     | 1.0  | 1.1  | 1.2  | -1.0 | unknown Function                                                                              | YIL036w          | orf19.6102  |
| CA2458  | IPF12233    | 1.0  | -1.1 | -1.0 | -1.0 | unknown function                                                                              | YKL151c          | orf19.3508  |
| CA4674  | HEM2        | 1.1  | -1.1 | 1.0  | -1.0 | Porphobilinogen synthase (by homology)                                                        | YGL040c          | orf19.898   |
| CA4916  | IPF1425     | -1.0 | 1.0  | -1.0 | -1.0 | Hypothetical phosphoglycerate mutase (by homology)                                            | YOR283w          | orf19.6056  |
| CA1358  | NIF3        | -1.0 | -1.1 | -1.1 | -1.0 | Ngg1p-interacting factor 3 (by homology)                                                      | YGL221c          | orf19.4406  |
| CA1296  | IPF18712    | -1.1 | 1.0  | -1.0 | -1.0 | unknown function                                                                              |                  |             |
| CA1480  | HIS6        | 1.1  | 1.0  | -1.1 | -1.0 | 5 Pro-FAR isomerase                                                                           | YIL020c          | orf19.1249  |
| CA3281  | RPB8        | 1.0  | -1.1 | -1.0 | -1.0 | DNA-directed RNA polymerase I, II, III 16 KD subunit (b                                       | YOR224c          | orf19.6314  |
| CA4558  | GRP5        | 1.1  | 1.0  | -1.0 | -1.0 | dihydroflavonol-4-reductases (by homology)                                                    |                  | orf19.6868  |
| CA4562  | RPS8A       | 1.1  | -1.0 | -1.1 | -1.0 | ribosomal protein (by homology)                                                               | YER102w          | orf19.6873  |
| CA0063  | IPF19310.3F | 1.0  | 1.0  | -1.0 | -1.0 | unknown function, 3-prime end                                                                 | Missing in array |             |
| CA3494  | RPB5        | 1.1  | 1.0  | 1.1  | -1.0 | DNA-directed RNA polymerase I, II, III (by homology)                                          | YBR154c          | orf19.6340  |
| CA0132  | SPT10       | -1.1 | -1.0 | 1.1  | -1.0 | Transcription regulatory protein (by homology)                                                | YJL127c          | orf19.2361  |
| CA4356  | IPF3651     | 1.0  | -1.0 | -1.0 | -1.0 | unknown function                                                                              |                  |             |
| CA1680  | IPF15649    | -1.0 | -1.0 | -1.0 | -1.0 | unknown function                                                                              | YOL087c          | orf19.4913  |
| CA2231  | IPF10934    | 1.0  | 1.0  | 1.0  | -1.0 | similar to <i>Saccharomyces cerevisiae</i> Rny1 ribonuclease                                  | YPL123c          | orf19.3926  |
| CA4458  | IPF8464     | 1.1  | -1.0 | -1.1 | -1.0 | unknown function                                                                              |                  | orf19.6855  |
| CA5199  | IPF2334     | 1.0  | -1.0 | -1.0 | -1.0 | unknown function                                                                              |                  | orf19.7013  |
| CA4239  | IPF8174     | -1.1 | 1.0  | -1.1 | -1.0 | unknown function                                                                              |                  | orf19.524   |
| CA5806  | IPF4149     | 1.0  | -1.1 | 1.0  | -1.0 | unknown function                                                                              | YKL095w          | orf19.5465  |
| CA0164  | IPF11694    | 1.0  | 1.0  | -1.0 | -1.0 | similar to <i>Saccharomyces cerevisiae</i> Tna1p high affinity                                | YGR260w          | orf19.4335  |
| LexA BD |             | -1.0 | -1.0 | -1.0 | -1.0 |                                                                                               |                  |             |
| CA4585  | IPF2227     | -1.1 | -1.1 | -1.1 | -1.0 | unknown function                                                                              | YKR025w          | orf19.6903  |
| CA4624  | IPF5747     | -1.1 | 1.0  | -1.0 | -1.0 | unknown function                                                                              | YBR255w          | orf19.3318  |
| CA3502  | IPF14485    | -1.1 | -1.0 | -1.1 | -1.0 | unknown function                                                                              |                  | orf19.6348  |
| CA5436  | CTF18       | -1.0 | -1.0 | -1.1 | -1.0 | chromosome transmission in mitosis and maintenance                                            | YMR078c          | orf19.3239  |
| CA3975  | IPF20152    | 1.0  | 1.0  | -1.1 | -1.0 | unknown function                                                                              | YMR156c          | orf19.1547  |
| CA0506  | IPF11988    | 1.0  | 1.0  | -1.1 | -1.0 | unknown function                                                                              | YML096w          | orf19.3626  |
| CA1658  | IPF19924    | 1.0  | -1.0 | -1.1 | -1.0 | unknown function                                                                              |                  | orf19.4324  |
| CA0629  | IPF3876     | -1.0 | -1.0 | -1.1 | -1.0 | unknown function                                                                              |                  | orf19.775   |
| CA0153  | IPF16368.5F | -1.1 | 1.0  | -1.2 | -1.0 | Unknown function, 5-prime end                                                                 |                  | orf19.255   |
| CA4884  | ALK6        | -1.0 | -1.0 | 1.0  | -1.0 | n-alkane inducible cytochrome P-450 (by homology)                                             |                  | orf19.6574  |
| CA3410  | IPF9411     | -1.1 | -1.1 | -1.0 | -1.0 | unknown function                                                                              | YER030w          | orf19.6147  |
| CA5583  | IPF5644     | -1.0 | -1.0 | -1.2 | -1.0 | unknown function                                                                              | YOR123c          | orf19.7116  |
| CA1436  | IPF7165     | -1.1 | -1.0 | -1.1 | -1.0 | similar to <i>Saccharomyces cerevisiae</i> Dia4p seryl-tRNA                                   | YHR011w          | orf19.1201  |
| CA0582  | IPF3180     | 1.1  | -1.0 | -1.0 | -1.0 | unknown function                                                                              | YDR437w          | orf19.11041 |
| CA1286  | IPF5546     | -1.0 | -1.0 | -1.1 | -1.0 | unknown function                                                                              |                  | orf19.11906 |

|         |              |      |      |      |      |                                                                                    |         |             |
|---------|--------------|------|------|------|------|------------------------------------------------------------------------------------|---------|-------------|
| CA5994  | IPF677       | 1.0  | -1.0 | 1.0  | -1.0 | unknown function                                                                   |         | orf19.7594  |
| CA5121  | IPF1310      | -1.1 | -1.1 | -1.1 | -1.0 | unknown function                                                                   | YLR387c | orf19.6407  |
| CA2348  | IPF12811     | 1.1  | -1.1 | -1.1 | -1.0 | putative serine/threonine kinase                                                   | YOR233w | orf19.3751  |
| CA2986  | CDC5         | -1.0 | 1.1  | 1.0  | -1.0 | Cell-cycle protein kinase (by homology)                                            | YMR001c | orf19.6010  |
| CA0852  | KIP2         | -1.0 | -1.1 | -1.1 | -1.0 | Kinesin-related protein required for nuclear migration (b                          | YPL155c | orf19.9315  |
| CA4213  | IPF5795      | -1.0 | -1.1 | -1.1 | -1.0 | unknown function                                                                   | YLR283w | orf19.811   |
| CA5693  | GDA1         | -1.1 | -1.0 | 1.0  | -1.0 | Golgi guanosine diphosphatase (by homology)                                        | YEL042w | orf19.7394  |
| CA0572  | IPF14864     | -1.2 | -1.1 | -1.2 | -1.0 | unknown function                                                                   | YDL119c | orf19.9370  |
| CA1924  | IPF9126      | 1.2  | 1.1  | 1.1  | -1.0 | unknown function                                                                   | YOL105c | orf19.5537  |
| CA5229  | IPF10425     | -1.0 | 1.0  | -1.1 | -1.0 | unknown function                                                                   | YBR215w | orf19.5035  |
| CA4891  | IPF1627      | -1.0 | 1.0  | 1.0  | -1.0 | unknown function                                                                   |         | orf19.6583  |
| CA4865  | IPF4085      | -1.1 | -1.0 | 1.0  | -1.0 | similar to <i>Saccharomyces cerevisiae</i> Apg1p essential fo                      | YGL180w | orf19.3841  |
| CA5511  | AKL1         | -1.4 | 1.0  | -1.1 | -1.0 | serine/threonine protein kinase (by homology)                                      | YIL095w | orf19.5357  |
| CA3031  | IPF12324     | 1.0  | 1.0  | -1.1 | -1.0 | unknown function                                                                   | YPR013c | orf19.217   |
| CA3694  | IPF4872.3F   | -1.0 | 1.0  | -1.1 | -1.0 | unknown function, 3-prime end                                                      |         | orf19.6269  |
| CA2127  | IPF4897      | -1.0 | -1.0 | 1.0  | -1.0 | unknown function                                                                   |         | orf19.416   |
| CA4308  | IPF6660      | 1.0  | -1.0 | -1.0 | -1.0 | unknown function                                                                   |         | orf19.6708  |
| CA4708  | MEU1         | -1.0 | 1.1  | 1.1  | -1.0 | regulator of ADH2 expression (by homology)                                         | YLR017w | orf19.6938  |
| CA0292  | IPF19855     | 1.0  | 1.0  | -1.0 | -1.0 | unknwon function                                                                   |         | orf19.13841 |
| CA5135  | HSP104       | 1.1  | -1.0 | -1.1 | -1.0 | Heat shock protein (by homology)                                                   | YLL026w | orf19.13747 |
| CA3844  | IPF7945      | -1.1 | -1.0 | 1.0  | -1.0 | unknown function                                                                   |         | orf19.6604  |
| CA3887  | IPF12964     | -1.0 | -1.0 | -1.1 | -1.0 | similar to <i>Saccharomyces cerevisiae</i> Sfh1p subunit of tf                     | YLR321c | orf19.5093  |
| CA2626  | PAN2         | -1.0 | 1.0  | 1.0  | -1.0 | component of Pab1p-stimulated poly(A)(by homology)                                 | YGL094c | orf19.4764  |
| CA4181  | HOM6         | 1.0  | 1.0  | 1.0  | -1.0 | homoserine dehydrogenase (by homology)                                             | YJR139c | orf19.2951  |
| CA5799  | IPF4176      | 1.1  | -1.0 | 1.0  | -1.0 | unknown function                                                                   |         | orf19.5449  |
| CA4849  | IPF6954      | 1.0  | -1.1 | 1.0  | -1.0 | unknown function                                                                   |         | orf19.3818  |
| CA2259  | IPF6845      | 1.0  | 1.0  | -1.0 | -1.0 | unknown function                                                                   | YNL099c | orf19.1762  |
| CA0625  | IPF19637     | 1.1  | 1.0  | -1.1 | -1.0 | unknown function                                                                   |         |             |
| CA4288  | IPF6662      | 1.0  | -1.0 | 1.0  | -1.0 | similar to <i>Saccharomyces cerevisiae</i> Isy1p pre-mRNA s                        | YJR050w | orf19.6685  |
| CA3091  | IPF9821.5F   | -1.0 | -1.0 | 1.0  | -1.0 | unknown function, 5-prime end                                                      |         | orf19.11618 |
| CA3855  | IPF4645      | 1.0  | 1.0  | -1.0 | -1.0 | unknown Function                                                                   | YER046w | orf19.6103  |
| CA2274  | BIO3         | 1.0  | 1.0  | 1.0  | -1.0 | DAPA aminotransferase (by homology)                                                | YNR058w | orf19.2591  |
| CA0630  | IPF3875.5EOC | 1.0  | -1.0 | 1.0  | -1.0 | unknown function, 5-prime end                                                      |         | orf19.776   |
| CA1236  | YPT6         | -1.1 | -1.0 | -1.1 | -1.0 | GTP-binding protein of the rab family (by homology)                                | YLR262c | orf19.8333  |
| CA2139  | PF15654.EXON | 1.1  | 1.0  | -1.0 | -1.0 | unknown function, exon 1                                                           |         | orf19.2509  |
| CA5382  | IPF5217      | 1.1  | 1.0  | 1.5  | -1.0 | unknown function                                                                   |         | orf19.7270  |
| CA3545  | BPT1.5F      | 1.1  | 1.1  | 1.1  | -1.0 | membrane transporter of the ATP-binding cassette (ABC) superfamily, 5-prime end (t |         | orf19.6383  |
| CA4297  | IPF2603      | 1.0  | -1.1 | -1.0 | -1.0 | unknown function                                                                   |         | orf19.6694  |
| CA2967  | IPF12513     | -1.0 | -1.1 | -1.2 | -1.0 | unknown function                                                                   | YJL084c | orf19.5605  |
| CA4426  | AMD21        | 1.1  | 1.0  | -1.0 | -1.0 | amidase (by homology)                                                              |         | orf19.5169  |
| CA3500  | IPF14487     | -1.1 | 1.0  | 1.0  | -1.0 | unknown function                                                                   | YDR361c | orf19.6346  |
| CA5835  | IPF429       | 1.1  | 1.0  | 1.1  | -1.0 | unknown function                                                                   | YGL220w |             |
| CA5940  | IPF3485      | 1.0  | -1.2 | -1.3 | -1.0 | aldo/keto reductase (by homology)                                                  | YOR120w | orf19.6757  |
| CA3661  | IPF17991     | 1.0  | 1.1  | -1.2 | -1.0 | unknown function                                                                   |         | orf19.6465  |
| CA3236  | DEG1         | -1.1 | -1.1 | -1.0 | -1.0 | pseudouridine synthase (by homology)                                               | YFL001w | orf19.6297  |
| CA1781  | IPF14508     | 1.0  | -1.0 | -1.0 | -1.0 | unknown function                                                                   | YEL029c | orf19.1828  |
| CA3427  | IPF11865     | 1.1  | -1.0 | -1.1 | -1.0 | unknown function                                                                   |         | orf19.590   |
| CA0442  | IFC4         | -1.0 | -1.0 | -1.0 | -1.0 | unknown function                                                                   |         | orf19.2292  |
| 14652.2 |              | 1.0  | 1.0  | -1.1 | -1.0 |                                                                                    |         |             |

|            |            |      |      |      |      |                                                                                         |                           |             |
|------------|------------|------|------|------|------|-----------------------------------------------------------------------------------------|---------------------------|-------------|
| CA4444     | IPF3533    | 1.0  | 1.1  | 1.2  | -1.0 | putative GDP/GTP exchange factor (by homology)                                          | YLR425w                   | orf19.6842  |
| CA3163     | HOL5.5F    | 1.1  | 1.0  | 1.1  | -1.0 | member of major facilitator superfamily multidrug-resistance protein subfamily 1, 5-pri |                           | orf19.1582  |
| CA3096     | IPF11551   | -1.0 | 1.0  | -1.0 | -1.0 | unknown function                                                                        |                           | orf19.3858  |
| CA4668     | ROM2       | -1.0 | 1.0  | 1.2  | -1.0 | GDP/GTP exchange factor for Rho1p (by homology)                                         | YLR371w                   | orf19.906   |
| CA3332     | GAG        | -1.1 | -1.1 | -1.2 | -1.0 | GAG protein of pCal retrotransposon                                                     |                           | orf19.2668  |
| CA2793     | TRK1.5F    | 1.0  | 1.1  | 1.1  | -1.0 | Potassium transporter, 5-prime end                                                      | YKR050w                   | orf19.8233  |
| CA0350     | SNU114     | -1.0 | -1.0 | -1.0 | -1.0 | snRNP-specific protein (by homology)                                                    | YKL173w                   | orf19.7784  |
| CA4007     | LAP41      | -1.0 | -1.1 | -1.1 | -1.0 | aminopeptidase yscl precursor (by homology)                                             | YKL103c                   | orf19.1628  |
| CA5905     | RPD32      | -1.3 | -1.0 | -1.1 | -1.0 | histone deacetylase B (by homology)                                                     | YNL330c                   | orf19.6801  |
| CA5755     | IPF1063    | -1.1 | -1.1 | -1.1 | -1.0 | Spliceosomal protein SAP 130 (by homology)                                              | YML049c                   | orf19.5391  |
| CA1045     | IPF11620   | -1.1 | -1.1 | 1.0  | -1.0 | similar to <i>Saccharomyces cerevisiae</i> Rad50p DNA repa                              | YNL250w                   | orf19.1648  |
| CA5770     | IPF1103    | 1.0  | 1.1  | 1.0  | -1.0 | unknown function                                                                        | YKR004c                   | orf19.5412  |
| CA3978     | CPR3       | 1.1  | -1.1 | -1.2 | -1.0 | cyclophilin (peptidylprolyl isomerase), mitochondrial (by homology)                     |                           | orf19.1552  |
| CA2930     | IPF7840    | 1.0  | -1.1 | -1.1 | -1.0 | similar to <i>Saccharomyces cerevisiae</i> Pet123p ribosoma                             | YOR158w                   | orf19.4204  |
| CA4740     | IPF4497    | 1.0  | -1.1 | 1.0  | -1.0 | unknown function                                                                        | YIL079c                   | orf19.4844  |
| CA1778     | IPF13810.3 | -1.1 | -1.1 | -1.1 | -1.0 | unknown function, 3-prime end                                                           |                           | orf19.1825  |
| CA3360     | IPF9568    | 1.1  | -1.1 | -1.0 | -1.0 | unknown function                                                                        |                           | orf19.9493  |
| CA0007     | IPF12061   | -1.0 | 1.1  | -1.1 | -1.0 | unknown function                                                                        |                           | orf19.7807  |
| CA0800     | IPF14064   | -1.1 | -1.1 | 1.1  | -1.0 | similar to <i>Saccharomyces cerevisiae</i> Mcm21p involved                              | YDR318w                   | orf19.3494  |
| CA3003     | IPF15741   | -1.2 | 1.0  | -1.0 | -1.0 | similar to <i>Saccharomyces cerevisiae</i> Cyk3p possibly inv                           | YDL117w                   | orf19.13620 |
| CA3466     | MRP1.5F    | -1.1 | -1.1 | -1.1 | -1.0 | mitochondrial ribosomal protein of the small subunit, 5-prime end (by homology)         |                           | orf19.1662  |
| CA5687     | REV3.5F    | -1.0 | 1.1  | -1.0 | -1.0 | DNA-directed DNA polymerase zeta subunit, 5-prime er                                    | YPL167c                   | orf19.7389  |
| CA2961     | URK1       | 1.0  | 1.1  | 1.1  | -1.0 | uridine kinase (by homology)                                                            | YNR012w                   | orf19.5864  |
| CA5544     | IPF5987    | 1.0  | -1.1 | -1.1 | -1.0 | unknown function                                                                        | YPR127w                   | orf19.7306  |
| CA5247     | MYO2       | -1.5 | 1.0  | -1.1 | -1.0 | Myosin heavy chain (by homology)                                                        | YOR326w                   | orf19.5015  |
| CA0085     | IPF16201   | -1.1 | 1.0  | 1.3  | -1.0 | unknown function                                                                        |                           | orf19.693   |
| CA2762     | IPF15012   | 1.0  | 1.0  | -1.0 | -1.0 | pre mRNA splicing factor (by homology)                                                  | YBL032w                   | orf19.13072 |
| CA2010     | IPF1731    | 1.2  | 1.0  | 1.0  | -1.0 | unknown function                                                                        | YDR184c                   | orf19.3088  |
| CA1622     | IPF10045   | -1.0 | -1.0 | -1.0 | -1.0 | similar to <i>Saccharomyces cerevisiae</i> Taf61p TFIID and                             | YDR145w                   | orf19.470   |
| CA0399     | CDC45      | -1.1 | -1.0 | 1.0  | -1.0 | Chromosomal DNA replication initiation protein (by hom                                  | YLR103c                   | orf19.1988  |
| CA1387     | ERG16      | 1.2  | -1.2 | -1.0 | -1.0 | cytochrome P450 lanosterol 14a-demethylase                                              | YHR007c                   | orf19.922   |
| CA5073     | IPF3603    | 1.0  | -1.0 | -1.0 | -1.0 | unknown function                                                                        |                           | orf19.3048  |
| CA0149     | VPS34      | -1.1 | -1.0 | -1.1 | -1.0 | 1-phosphatidylinositol 3-kinase                                                         | YLR240w                   | orf19.6243  |
| CA0159     | TUB4.3     | 1.0  | -1.0 | -1.0 | -1.0 | gamma-tubulin, 3-prime end                                                              | YLR212c ;Missing in array | orf19.1238  |
| CA0675     | IPF13098   | -1.1 | -1.1 | -1.1 | -1.0 | unknown function                                                                        | YER152c                   | orf19.8771  |
| CA0434     | IPF13577   | 1.1  | 1.1  | 1.0  | -1.0 | unknown function                                                                        |                           | orf19.9303  |
| CA1983     | ILV5       | -1.4 | 1.1  | -1.1 | -1.0 | ketol-acid reducto-isomerase (by homology)                                              | YLR355c                   | orf19.7733  |
| CA4192     | IPF7533    | -1.1 | -1.1 | -1.0 | -1.0 | unknown function                                                                        | YDR117c                   | orf19.4533  |
| CA3557     | IPF7763    | -1.0 | 1.0  | -1.0 | -1.0 | unknown function                                                                        |                           | orf19.3886  |
| CA3863     | LEU41      | 1.1  | -1.0 | -1.0 | -1.0 | 2-isopropylmalalate synthase (by homology)                                              | YNL104c                   | orf19.6086  |
| CA2664     | IPF13370   | -1.1 | -1.0 | -1.0 | -1.0 | unknown function                                                                        | YKR083c                   | orf19.3551  |
| CA4629     | IPF13709   | -1.2 | -1.1 | -1.2 | -1.0 | unknown function                                                                        |                           | orf19.335   |
| CA4260     | IPF4276    | 1.1  | -1.1 | -1.1 | -1.0 | similar to <i>Saccharomyces cerevisiae</i> Mrp132p putative n                           | YCR003w                   | orf19.549   |
| CA6094     | IPF53      | 1.0  | -1.1 | 1.0  | -1.0 | unknown function                                                                        | YDL193w                   | orf19.5963  |
| CA5609     | IPF538     | 1.1  | -1.0 | 1.0  | -1.0 | unknown function                                                                        |                           | orf19.7091  |
| CA3330     | POL21.3    | -1.1 | -1.1 | -1.2 | -1.0 | pol polyprotein, reverse transcripase (by homology)                                     |                           | orf19.2669  |
| CA5773     | DOT5       | 1.0  | -1.0 | -1.0 | -1.0 | Derepression of telomeric silencing (by homology)                                       | YIL010w                   | orf19.5417  |
| Luciferase |            | -1.0 | 1.0  | 1.1  | -1.0 |                                                                                         |                           |             |
| CA1244     | IPF12767   | -1.0 | 1.0  | -1.0 | -1.0 | unknown function                                                                        |                           | orf19.2624  |

|        |           |      |      |      |      |                                                              |                  |             |
|--------|-----------|------|------|------|------|--------------------------------------------------------------|------------------|-------------|
| CA2218 | IPF18508  | 1.1  | 1.0  | -1.1 | -1.0 | unknown function                                             | Missing in array | orf19.5375  |
| CA4358 | IPF6067   | -1.0 | 1.0  | 1.0  | -1.0 | putative transcription factor (by homology)                  |                  | orf19.6734  |
| CA5132 | GTS1      | 1.0  | 1.0  | 1.0  | -1.0 | Transcription factor by homology                             | YGL181w          | orf19.6393  |
| CA1942 | HCT5.3EOC | 1.1  | -1.0 | 1.0  | -1.0 |                                                              |                  |             |
| CA3490 | IPF3192   | 1.0  | -1.1 | 1.0  | -1.0 | unknown function                                             |                  | orf19.3565  |
| CA4074 | IPF2557   | 1.2  | -1.2 | -1.1 | -1.0 | unknown function                                             | YDR476c          | orf19.6627  |
| CA5315 | CYB2      | -1.1 | 1.0  | 1.1  | -1.0 | B-type cyclin                                                | YLR210w          | orf19.7186  |
| CA2757 | IPF19767  | 1.0  | -1.0 | 1.0  | -1.0 | unknown function                                             | YPR097w          | orf19.13066 |
| CA0057 | IPF3767   | 1.1  | -1.2 | -1.2 | -1.0 | unknown function                                             | YPR143w          |             |
| CA2494 | HTS1      | -1.1 | -1.0 | 1.1  | -1.0 | histidine tRNA synthetase (by homology)                      | YPR033c          | orf19.4051  |
| CA5153 | IPF1003   | -1.0 | -1.0 | 1.0  | -1.0 | unknown function                                             |                  | orf19.4592  |
| CA2890 | IPF13626  | 1.1  | -1.0 | 1.0  | -1.0 | Putative methyltransferase (by homology)                     | YER175c          | orf19.2468  |
| CA4198 | IPF8055   | 1.1  | -1.1 | -1.1 | -1.0 | unknown function                                             |                  | orf19.4539  |
| CA1522 | IPF6916   | 1.0  | 1.0  | 1.0  | -1.0 | unknown function                                             |                  | orf19.3791  |
| CA2067 | IPF6976   | -1.0 | 1.0  | -1.0 | -1.0 | unknown function                                             |                  | orf19.2642  |
| CA1042 | IPF18784  | -1.0 | -1.0 | 1.1  | -1.0 | unknown function                                             |                  | orf19.2506  |
| CA3560 | CZF1      | -1.0 | 1.2  | 1.1  | -1.0 | canal zinc finger protein                                    |                  | orf19.3127  |
| CA2433 | IPF12959  | 1.0  | 1.1  | -1.0 | -1.0 | unknown function                                             | YDR485c          | orf19.3399  |
| CA5167 | ERG8      | -1.1 | -1.1 | -1.1 | -1.0 | Phosphomevalonate kinase (by homology)                       | YMR220w          | orf19.4606  |
| CA1713 | IPF19743  | 1.0  | -1.0 | 1.0  | -1.0 | unknown function                                             | YDL231c          | orf19.3332  |
| CA5708 | MRPL39    | 1.0  | -1.0 | 1.0  | -1.0 | Mitochondrial 60S ribosomal protein (by homology)            | YML009c          |             |
| CA5850 | IPF404.3F | 1.0  | -1.0 | 1.0  | -1.0 | unknown function, 3-prime end                                |                  | orf19.7507  |
| CA5815 | IPF2517   | 1.0  | -1.0 | -1.0 | -1.0 | putative protease (by homology)                              |                  | orf19.7464  |
| CA1591 | IPF14663  | -1.0 | -1.0 | -1.0 | -1.0 | unknown function                                             |                  | orf19.11791 |
| CA5840 | EBP6      | -1.1 | 1.0  | 1.0  | -1.0 | NADPH dehydrogenase (by homology)                            |                  | orf19.7495  |
| CA3205 | IPF3448   | -1.0 | 1.0  | -1.0 | -1.0 | Unknown function                                             |                  | orf19.6185  |
| CA6087 | YHV1      | -1.0 | -1.1 | -1.1 | -1.0 | unknown function                                             | YHR151c          | orf19.5971  |
| CA5088 | IPF9758   | 1.0  | -1.0 | -1.1 | -1.0 | similar to <i>Saccharomyces cerevisiae</i> Dpb3p DNA-direct  | YBR278w          | orf19.3063  |
| CA2034 | SGD1.3F   | -1.0 | 1.1  | 1.0  | -1.0 | Involved in HOG pathway, 3-prime end (by homology)           |                  |             |
| CA5983 | IPF913    | -1.1 | 1.1  | 1.1  | -1.0 | unknown function                                             |                  | orf19.7579  |
| CA4913 | CIS2      | -1.0 | 1.0  | -1.0 | -1.0 | Gamma-glutamyltransferase (by homology)                      | YLR299w          | orf19.6053  |
| CA5501 | MTR2.3    | 1.0  | -1.0 | -1.1 | -1.0 | mRNA transport protein, 3-prime end (by homology)            | YKL186c          |             |
| CA3426 | IPF11869  | -1.0 | 1.1  | 1.1  | -1.0 | unknown function                                             | YNL092w          | orf19.592   |
| CA3368 | IPF4671   | -1.1 | -1.1 | 1.1  | -1.0 | unknown Function                                             | YIL091c          | orf19.1849  |
| CA4121 | IPF7081   | 1.0  | 1.0  | -1.0 | -1.0 | unknown function                                             |                  | orf19.2770  |
| CA1215 | VPS15.3F  | -1.1 | 1.0  | -1.0 | -1.0 | serine/threonine protein kinase, 3-prime end                 |                  | orf19.7773  |
| CA4853 | IPF5823   | 1.0  | 1.0  | -1.1 | -1.0 | similar to <i>Saccharomyces cerevisiae</i> Zds1p involved in | YMR273c          | orf19.3823  |
| CA4168 | IPF7781   | -1.1 | 1.0  | -1.0 | -1.0 | putative pump-driving ATPase                                 | YDL100c          | orf19.2965  |
| CA0210 | IPF4328   | 1.1  | -1.2 | -1.1 | -1.0 | unknown function                                             | YMR315w          | orf19.12971 |
| CA3327 | NCP1      | -1.1 | -1.1 | -1.1 | -1.0 | NADPH-cytochrome P450 reductase                              | YHR042w          | orf19.2672  |
| CA1142 | IPF9459   | 1.1  | -1.0 | -1.1 | -1.0 | unknown function                                             |                  | orf19.4070  |
| CA0047 | PTC2      | -1.1 | -1.0 | 1.0  | -1.0 | Protein phosphatase type 2C (by homology)                    | YER089c          | orf19.2538  |
| CA5935 | IPF2798   | 1.0  | -1.1 | -1.1 | -1.0 | unknown function                                             | YNL175c          | orf19.6766  |
| CA0237 | IPF13416  | -1.0 | -1.1 | -1.2 | -1.0 | Unknown function                                             | YAL011w          | orf19.7818  |
| CA4593 | IPF2214   | 1.0  | -1.0 | 1.0  | -1.0 | unknown function                                             | YDR013w          | orf19.6910  |
| CA5943 | IPF3490   | 1.0  | -1.0 | 1.0  | -1.0 | unknown function                                             |                  | orf19.6754  |
| CA2208 | IPF17255  | 1.1  | 1.0  | 1.1  | -1.0 | similar to <i>Saccharomyces cerevisiae</i> Ste2p pheromone   | YFL026w          | orf19.696   |
| CA1123 | IPF19723  | -1.2 | -1.1 | -1.3 | -1.0 | similar to <i>Saccharomyces cerevisiae</i> Bph1p involved in | YCR032w          | orf19.6261  |
| CA5980 | IPF918    | -1.1 | -1.0 | -1.0 | -1.0 | unknown function                                             |                  | orf19.7576  |

|        |             |      |      |      |      |                                                                      |                  |             |
|--------|-------------|------|------|------|------|----------------------------------------------------------------------|------------------|-------------|
| CA1862 | NMD2        | -1.0 | 1.0  | -1.1 | -1.0 | Nonsense-mediated mRNA decay protein 2 (by homology)                 | YHR077c          | orf19.864   |
| CA4479 | URH1        | 1.1  | -1.0 | -1.0 | -1.0 | Uridine ribohydrolase (by homology)                                  | YDR400w          | orf19.1888  |
| CA3063 | IPF2971     | -1.1 | -1.1 | -1.1 | -1.0 | unknown function                                                     | YLR226w          | orf19.4284  |
| CA2396 | IPF6428     | -1.0 | 1.0  | -1.0 | -1.0 | unknown function                                                     | YKL086w          | orf19.3537  |
| CA3457 | IPF8521     | 1.0  | -1.0 | 1.1  | -1.0 | unknown function                                                     | YPL213w          | orf19.1260  |
| CA1618 | RRP45       | -1.0 | -1.2 | -1.0 | -1.0 | Protein component of the exosome 3-5 exoribonuclease                 | YDR280w          | orf19.11559 |
| CA6014 | TRS31       | 1.0  | -1.1 | 1.0  | -1.0 | targeting complex (TRAPP) component involved in ER targeting         | YDR472w          | orf19.7615  |
| CA3852 | TUP1        | 1.0  | 1.0  | 1.1  | -1.0 | general transcription repressor                                      | YCR084c          | orf19.6109  |
| CA0298 | PPT1        | -1.1 | -1.0 | -1.0 | -1.0 | Protein ser/thr phosphatase                                          | YGR123c          | orf19.1673  |
| CA0795 | IPF15641    | -1.0 | -1.0 | 1.0  | -1.0 | unknown function                                                     |                  | orf19.8186  |
| CA1185 | IPF19903    | 1.0  | 1.1  | 1.0  | -1.0 | unknown function                                                     |                  | orf19.11264 |
| CA3801 | UGA4        | -1.0 | 1.0  | 1.1  | -1.0 | GABA-specific transport protein                                      | YDL210w          | orf19.10016 |
| CA6063 | IPF8311     | -1.1 | -1.1 | -1.1 | -1.0 | unknown function                                                     | YLR094c          | orf19.6003  |
| CA1723 | TEF4        | 1.0  | 1.1  | 1.1  | -1.0 | translation elongation factor eEF1 (by homology)                     | YPL048w          | orf19.2651  |
| CA4943 | IPF5158     | -1.0 | -1.0 | 1.0  | -1.0 | unknown function                                                     |                  | orf19.6534  |
| CA0061 | IPF19315.3F | 1.0  | -1.0 | -1.0 | -1.0 | unknown function, 3-prime end                                        | Missing in array |             |
| CA4947 | NUC2        | -1.0 | 1.0  | -1.1 | -1.0 | NADH-UBIQUINONE OXIDOREDUCTASE (by homology)                         | Missing in array | orf19.6531  |
| CA5578 | IPF12536    | -1.0 | -1.0 | -1.0 | -1.0 | unknown function                                                     | YGR205w          | orf19.7345  |
| CA3701 | IPF11936.3F | -1.0 | -1.0 | 1.0  | -1.0 | unknown function, 5-prime end                                        |                  | orf19.13656 |
| CA2377 | MRPL7       | 1.0  | 1.0  | -1.1 | -1.0 | Ribosomal protein of the large subunit, mitochondrial (by homology)  | YDR237w          | orf19.2214  |
| CA3308 | PET127      | -1.0 | -1.1 | -1.0 | -1.0 | component of mitochondrial translation (by homology)                 | YOR017w          | orf19.9845  |
| CA4660 | YMC1        | 1.0  | -1.1 | -1.1 | -1.0 | mitochondrial carrier protein (MCF) (by homology)                    | YPR058w          | orf19.4447  |
| CA4037 | KIP31       | -1.0 | -1.0 | -1.0 | -1.0 | kinesin-related protein required for nuclear migration (by homology) |                  | orf19.3667  |
| CA0771 | IPF11977    | -1.0 | 1.1  | 1.0  | -1.0 | aspartic proteinase (by homology)                                    |                  | orf19.853   |
| CA4662 | LYS7        | -1.0 | -1.0 | -1.0 | -1.0 | Copper chaperone for superoxide dismutase Sod1p (by homology)        | YMR038c          | orf19.4449  |
| CA3488 | IPF3198     | -1.1 | -1.0 | -1.0 | -1.0 | unknown function                                                     | YDL076c          | orf19.3568  |
| CA0965 | IPF9139     | 1.0  | 1.1  | 1.2  | -1.0 | unknown function                                                     |                  | orf19.6248  |
| CA5137 | IPF1032     | 1.0  | 1.0  | 1.1  | -1.0 | similar to probable membrane protein [S. cerevisiae]                 | YOR059c          | orf19.4574  |
| CA5830 | MRPL9       | 1.1  | -1.0 | -1.2 | -1.0 | Mitochondrial ribosomal protein of the large subunit (by homology)   | YGR220c          | orf19.7485  |
| CA2922 | FET31       | -1.0 | -1.0 | -1.1 | -1.0 | cell surface ferroxidase (by homology)                               |                  | orf19.11689 |
| CA1668 | IPF11396    | -1.0 | 1.0  | -1.0 | -1.0 | unknown function                                                     |                  | orf19.2853  |
| CA4965 | IPF3921     | 1.0  | 1.0  | -1.1 | -1.0 | unknown function                                                     | YGR057c          | orf19.6508  |
| CA2687 | IFU6.3F     | 1.1  | 1.1  | 1.0  | -1.0 | Unknown function, 3-prime end                                        |                  | orf19.10113 |
| CA5859 | CHT1        | 1.0  | -1.0 | -1.0 | -1.0 | endochitinase 1 precursor                                            |                  | orf19.7517  |
| CA3028 | IPF18393    | -1.0 | -1.0 | 1.1  | -1.0 | unknown function                                                     |                  | orf19.11380 |
| CA2498 | VPS181      | -1.1 | -1.1 | -1.1 | -1.0 | vacuolar membrane protein                                            | YLR148w          | orf19.5584  |
| CA5602 | IPF554      | 1.1  | 1.0  | -1.1 | -1.0 | RNA binding protein (by homology)                                    |                  | orf19.7097  |
| CA6049 | IPF4935     | 1.0  | 1.1  | -1.0 | -1.0 | unknown function                                                     | YJL003w          | orf19.7665  |
| CA0529 | SMC2        | -1.0 | 1.0  | -1.0 | -1.0 | chromosome segregation protein (by homology)                         | YFR031c          | orf19.3623  |
| CA5258 | GCV3        | 1.0  | -1.2 | -1.1 | -1.0 | Glycine decarboxylase, subunit H (by homology)                       | YAL044c          | orf19.5006  |
| CA4758 | PPR1        | -1.0 | 1.0  | -1.1 | -1.0 | transcription factor regulating pyrimidine pathway (by homology)     | YLR014c          | orf19.3986  |
| CA1487 | GPT1        | 1.0  | 1.1  | -1.0 | -1.0 | polyamine transporter                                                |                  | orf19.4063  |
| CA5113 | IPF20026    | -1.1 | -1.1 | -1.2 | -1.0 | unknown function                                                     | YDL063c          | orf19.6418  |
| CA3044 | IPF7298     | 1.0  | -1.0 | -1.2 | -1.0 | unknown function                                                     |                  | orf19.2418  |
| CA1074 | PRORS.5F    | -1.1 | -1.1 | -1.2 | -1.0 | prolyl-tRNA synthetase, 5-prime end                                  |                  | orf19.2532  |
| CA3322 | IPF6895.3F  | -1.1 | -1.0 | -1.0 | -1.0 | unknown function, 3-prime end                                        |                  |             |
| CA0019 | IPF17799    | -1.0 | -1.0 | -1.0 | -1.0 | unknown function                                                     | YBR151w          |             |
| CA4560 | IPF8038     | -1.1 | 1.1  | -1.0 | -1.0 | unknown function                                                     | YMR124w          | orf19.6871  |
| CA3435 | IPF6391     | 1.0  | -1.1 | -1.1 | -1.0 | similarity to mammalian indoleamine 2,3-dioxygenase (by homology)    | YJR078w          | orf19.583   |



|        |              |      |      |      |      |                                                                 |         |             |
|--------|--------------|------|------|------|------|-----------------------------------------------------------------|---------|-------------|
| CA5102 | CDC23        | 1.0  | -1.0 | 1.0  | -1.0 | Subunit of anaphase-promoting complex (by homology)             | YHR166c | orf19.6437  |
| CA2841 | IPF12981     | 1.1  | -1.0 | 1.0  | -1.0 | unknown function                                                |         | orf19.5727  |
| CA0409 | PHO80        | -1.0 | -1.0 | -1.1 | -1.0 | Cyclin (by homology)                                            | YOL001w | orf19.5755  |
| CA1683 | CIRT         | -1.1 | -1.1 | -1.1 | -1.0 | Probable transposase                                            |         | orf19.4919  |
| CA5648 | UBC6         | -1.0 | 1.0  | 1.1  | -1.0 | E2 ubiquitin-conjugating enzyme (by homology)                   | YER100w | orf19.7347  |
| CA5888 | IPF2414      | 1.0  | -1.0 | -1.1 | -1.0 | unknown function                                                |         | orf19.6820  |
| CA0492 | SNU71        | 1.0  | -1.1 | -1.1 | -1.0 | Associated with U1 snRNP (by homology)                          | YGR013w | orf19.9068  |
| CA1306 | CDC14.3      | -1.1 | -1.1 | -1.1 | -1.0 | protein phosphatase, 3-prime end                                | YFR028c | orf19.4192  |
| CA0725 | IPF20063     | 1.0  | -1.1 | -1.1 | -1.0 | unknown function                                                |         | orf19.1749  |
| CA4925 | IPF1408      | 1.0  | -1.1 | -1.1 | -1.0 | unknown function                                                | YFR021w | orf19.6064  |
| CA1500 | IPF13221     | -1.0 | -1.0 | -1.1 | -1.0 | unknown function                                                | YOR091w | orf19.1697  |
| CA5758 | IPF1069      | 1.0  | -1.0 | 1.1  | -1.0 | similar to <i>Saccharomyces cerevisiae</i> Rav1p involved in    | YJR033c | orf19.5395  |
| CA2785 | MET13        | -1.0 | -1.0 | 1.0  | -1.0 | Methylene tetrahydrofolate reductase (by homology)              | YGL125w | orf19.288   |
| CA3182 | LIP4         | -1.0 | 1.0  | 1.1  | -1.0 | secretory lipase                                                |         | orf19.2133  |
| CA0948 | IPF10270     | -1.2 | -1.2 | -1.1 | -1.0 | unknown function                                                | YGR111w | orf19.1272  |
| CA5884 | SLF1         | -1.0 | -1.0 | -1.1 | -1.0 | Copper homeostasis protein (by homology)                        | YDR515w | orf19.6826  |
| 3692.2 |              | -1.1 | -1.1 | -1.1 | -1.0 |                                                                 |         |             |
| CA3611 | IPF3853      | -1.1 | -1.1 | -1.1 | -1.0 | unknown function                                                | YGR096w | orf19.28    |
| CA0094 | IPF12819     | 1.0  | 1.0  | 1.0  | -1.0 | unknown function                                                | YDR474c | orf19.3213  |
| CA0814 | IPF16233     | 1.0  | 1.1  | 1.1  | -1.0 | unknown function                                                |         | orf19.1914  |
| CA2701 | PF14414.EXON | -1.0 | -1.0 | -1.1 | -1.0 | unknown function, exon 2                                        |         | orf19.10255 |
| CA3172 | IPF7676      | -1.1 | 1.0  | 1.0  | -1.0 | unknown function                                                |         | orf19.1400  |
| CA2709 | IPF4828      | 1.1  | 1.0  | 1.0  | -1.0 | by homology to <i>S. cerevisiae</i> YEAST TRANSCRIPTION         | YPL089c | orf19.4662  |
| CA0703 | IPF11807     | -1.1 | -1.0 | -1.1 | -1.0 | unknown function                                                |         | orf19.2914  |
| CA0709 | ZORRO2A.3F   | 1.0  | 1.1  | 1.0  | -1.0 | Reverse transcriptase, 3-prime end                              |         | orf19.3387  |
| CA0138 | INH1         | 1.1  | -1.2 | -1.1 | -1.0 | Inhibitor of mitochondrial ATPase                               |         |             |
| CA2685 | MSH4         | -1.0 | 1.0  | -1.1 | -1.0 | DNA mismatch repair protein                                     | YFL003c | orf19.2579  |
| CA3903 | IPF14890     | 1.1  | -1.0 | -1.0 | -1.0 | unknown function                                                |         | orf19.4400  |
| CA0476 | UBP2         | -1.1 | 1.1  | -1.0 | -1.0 | Ubiquitin-specific proteinase (by homology)                     | YOR124c | orf19.8088  |
| CA0312 | IPF6396      | 1.2  | -1.0 | 1.1  | -1.0 | unknown function                                                | YNL254c | orf19.8211  |
| CA0329 | IMG2         | -1.0 | 1.0  | -1.1 | -1.0 | Required for Integrity of Mitochondrial Genome (by hom          | YCR071c | orf19.3777  |
| CA2767 | TOA1         | -1.1 | -1.1 | -1.1 | -1.0 | transcription initiation factor IIA (by homology)               | YOR194c | orf19.2682  |
| CA2100 | KTI12        | -1.0 | -1.1 | -1.2 | -1.0 | involved in resistance to <i>K.lactis</i> killer toxin (by h    | YKL110c | orf19.2385  |
| CA2503 | IPF6803.5F   | -1.0 | 1.0  | 1.0  | -1.0 | unknown function, 5-prime end                                   | YAL045c | orf19.5592  |
| CA5370 | IPF5248      | 1.0  | 1.0  | -1.1 | -1.0 | unknown function                                                | YPL005w | orf19.7254  |
| CA2113 | ATP12        | -1.1 | -1.1 | -1.0 | -1.0 | F1F0-ATPase complex assembly protein (by homology)              | YJL180c | orf19.3686  |
| CA0203 | MID1         | -1.1 | -1.1 | -1.1 | -1.0 | involved in Ca <sup>2+</sup> influx during mating (by homology) | YNL291c | orf19.10724 |
| CA5305 | IPF2175      | -1.0 | -1.0 | -1.2 | -1.0 | similar to <i>Saccharomyces cerevisiae</i> Hlj1p dnaJ-type pr   | YMR161w | orf19.7175  |
| CA3697 | IPF4866      | 1.0  | 1.1  | 1.1  | -1.0 | similar to <i>Saccharomyces cerevisiae</i> Yuh1p ubiquitin-sp   | YJR099w | orf19.13651 |
| CA3222 | IPF15883     | -1.0 | -1.0 | -1.0 | -1.0 | unknown function                                                |         | orf19.6283  |
| CA0009 | IPF11382     | 1.0  | -1.0 | 1.0  | -1.0 | unknown function                                                |         | orf19.8247  |
| CA5597 | IPF563       | -1.0 | -1.0 | -1.0 | -1.0 | unknown function                                                | YCL036w | orf19.7103  |
| CA0364 | IPF15983     | -1.1 | -1.1 | -1.1 | -1.0 | unknown function                                                | YLR363c | orf19.1525  |
| CA0841 | IPF15638     | 1.0  | -1.1 | -1.0 | -1.0 | unknown function                                                |         | orf19.8652  |
| CA3940 | NIC96        | -1.0 | -1.0 | -1.0 | -1.0 | nuclear pore protein (by homology)                              | YFR002w | orf19.9553  |
| CA5590 | TAD1         | -1.0 | -1.0 | 1.1  | -1.0 | Double-stranded rna specific adenosine deaminase by             | YGL243w | orf19.7110  |
| CA3296 | PF5723.EXON  | 1.1  | -1.1 | 1.2  | -1.0 | cell surface GPI-anchored protein, exon 2 (by homology)         |         | orf19.6336  |
| CA4233 | RFT1         | 1.2  | -1.1 | -1.0 | -1.0 | nuclear division protein (by homology)                          | YBL020w | orf19.516   |
| CA2691 | PTR2.EXON1   | 1.0  | 1.0  | 1.0  | -1.0 | Peptide transporter for di- and tripeptides, exon 1             |         | orf19.2583  |

|        |              |      |      |      |      |                                                                     |                            |             |
|--------|--------------|------|------|------|------|---------------------------------------------------------------------|----------------------------|-------------|
| CA1731 | IPF8437      | -1.1 | -1.2 | -1.1 | -1.0 | putative DNA-directed RNA polymerase (by homology)                  |                            | orf19.6499  |
| CA5461 | GSL23.5F     | 1.1  | 1.0  | -1.0 | -1.0 | 1,3-beta-D-glucan synthase subunit, 5-prime end                     |                            | orf19.3269  |
| CA1152 | IPF10457     | 1.0  | -1.0 | -1.0 | -1.0 | nuclear fusion protein-like (by homology)                           |                            | orf19.103   |
| CA1263 | IPF9880      | 1.0  | 1.2  | 1.1  | -1.0 | unknown function                                                    |                            | orf19.1246  |
| CA4415 | HIK1.3EOC    | -1.0 | 1.1  | 1.1  | -1.0 | histidine kinase, 3-prime end                                       |                            |             |
| CA4033 | IPF19795     | 1.1  | 1.1  | 1.0  | -1.0 | similar to <i>Saccharomyces cerevisiae</i> Mip1p DNA-directe        |                            | orf19.3431  |
| CA5689 | REV3.3F      | -1.0 | -1.0 | 1.0  | -1.0 | DNA-directed DNA polymerase zeta subunit, 3-prime end (by homology) |                            | orf19.7390  |
| CA0439 | IPF12478     | -1.1 | -1.0 | -1.1 | -1.0 | unknown function                                                    | YML034w                    | orf19.13015 |
| CA1857 | IPF15348     | 1.0  | 1.0  | -1.0 | -1.0 | unknown function                                                    |                            | orf19.9080  |
| CA0639 | FDH13.3F     | 1.0  | 1.0  | 1.0  | -1.0 | Putative formate dehydrogenase, 3-prime end (by homology)           |                            |             |
| CA4960 | IPF3912      | 1.3  | 1.1  | 1.4  | -1.0 | unknown function                                                    | YPL177c                    | orf19.6514  |
| CA4345 | IPF3633.3    | -1.0 | -1.0 | -1.1 | -1.0 | similar to <i>Saccharomyces cerevisiae</i> Hir3p involved in c      |                            | orf19.6719  |
| CA2876 | RNR2         | 1.1  | 1.0  | 1.0  | -1.0 | Ribonucleotide reductase (by homology)                              |                            | orf19.5845  |
| CA1052 | IPF15861     | 1.0  | 1.0  | 1.0  | -1.0 | unknown function                                                    |                            | orf19.3894  |
| CA1931 | IPF3905      | -1.3 | 1.0  | -1.2 | -1.0 | similar to <i>Saccharomyces cerevisiae</i> Sec21p coatomer          | YNL287w                    | orf19.759   |
| CA0073 | IPF19283.5F  | 1.0  | -1.0 | 1.0  | -1.0 | unknown function, 5-prime end                                       | Missing in array           |             |
| CA4071 | IPF2561      | 1.1  | 1.0  | 1.1  | -1.0 | unknown function                                                    | YJL044c                    | orf19.6624  |
| CA1422 | IPF14248     | 1.0  | -1.1 | -1.1 | -1.0 | putative methyltransferase (by homology)                            | YDL201w                    | orf19.3798  |
| CA1616 | IPF14538     | -1.1 | -1.2 | -1.4 | -1.0 | unknown function                                                    |                            | orf19.3219  |
| CA4279 | DPH51        | 1.1  | 1.1  | 1.2  | -1.0 | Diphthamide methyltransferase (by homology)                         | YLR172c                    | orf19.6676  |
| CA4280 | IFJ5         | -1.0 | 1.0  | -1.0 | -1.0 | Unknown function                                                    |                            | orf19.6678  |
| CA3758 | IPF8889      | 1.0  | 1.0  | 1.0  | -1.0 | putative arginase (by homology)                                     |                            | orf19.10922 |
| CA6034 | APC11        | -1.2 | -1.1 | 1.1  | -1.0 | subunit of the anaphase promoting complex (by homolo                | YDL008w                    | orf19.7644  |
| CA2183 | IPF6872      | 1.0  | -1.0 | 1.0  | -1.0 | serine/threonine protein kinase (by homology)                       | YGR262c                    | orf19.4252  |
| CA0458 | IPF15601     | 1.0  | 1.0  | 1.0  | -1.0 | unknown function                                                    |                            | orf19.2433  |
| CA1878 | IPF10298     | -1.1 | 1.1  | -1.1 | -1.0 | unknown function                                                    | YPL202c                    | orf19.2272  |
| CA5716 | MED6         | -1.0 | 1.0  | -1.1 | -1.0 | RNA polymerase II transcriptional regulation mediator (t            | YHR058c                    | orf19.7420  |
| CA1901 | IPF14135     | -1.0 | -1.0 | -1.1 | -1.0 | unknown function                                                    | YNL022c                    | orf19.2604  |
| CA4768 | IPF9385      | 1.0  | -1.1 | -1.1 | -1.0 | similar to <i>Saccharomyces cerevisiae</i> Pho2p homeobox-          | YDL106c                    | orf19.4000  |
| CA3283 | IPF6274      | -1.0 | -1.1 | -1.0 | -1.0 | unknown function                                                    | YMR221c                    | orf19.6316  |
| CA0746 | IPF14921     | -1.0 | 1.1  | -1.0 | -1.0 | unknown function                                                    |                            | orf19.1527  |
| CA1981 | IPF9470      | -1.1 | -1.0 | -1.1 | -1.0 | similar to <i>Saccharomyces cerevisiae</i> Pcf11p componen          | YDR228c                    | orf19.684   |
| CA5522 | IPF708       | -1.1 | 1.0  | 1.0  | -1.0 | unknown function                                                    | YBR075w                    | orf19.5370  |
| CA2768 | IPF17011     | 1.0  | 1.0  | -1.0 | -1.0 | similar to <i>Saccharomyces cerevisiae</i> Slk19p involved in       | YOR195w ; Missing in array | orf19.2684  |
| CA2427 | IPF9898      | -1.0 | 1.0  | 1.0  | -1.0 | probable formate dehydrogenase (by homology)                        | YHL008c                    | orf19.3406  |
| CA1357 | ARH1         | -1.1 | -1.2 | -1.4 | -1.0 | adrenodoxin reductase and ferredoxin-NADP+ reductas                 | YDR376w                    | orf19.410   |
| CA6065 | SAP3         | -1.0 | -1.0 | -1.0 | -1.0 | secreted aspartyl proteinase                                        |                            | orf19.6001  |
| CA4584 | IPF2228      | -1.1 | -1.2 | -1.2 | -1.0 | similar to <i>Saccharomyces cerevisiae</i> Dbp7p RNA helica         | YKR024c                    | orf19.6902  |
| CA1850 | IPF14630     | 1.0  | -1.0 | -1.1 | -1.0 | unknown function                                                    | YFR041c                    | orf19.641   |
| CA1207 | PPG1         | -1.1 | 1.2  | -1.0 | -1.0 | Phosphoprotein phosphatase PPG catalytic chain (by h                | YNR032w                    | orf19.11256 |
| CA4252 | IPF4290      | -1.0 | 1.0  | -1.0 | -1.0 | unknown function                                                    |                            | orf19.541   |
| CA3444 | IPF11323     | -1.1 | -1.1 | -1.1 | -1.0 | unknown function                                                    | YLR424w                    | orf19.2980  |
| CA3486 | IPF3206      | -1.0 | -1.0 | -1.0 | -1.0 | unknown function                                                    |                            | orf19.3572  |
| CA0244 | IPF19082     | 1.0  | 1.0  | -1.1 | -1.0 | unknown function                                                    |                            |             |
| CA3377 | CLF1         | -1.0 | -1.1 | 1.0  | -1.0 | pre-mRNA splicing factor (by homology)                              | YLR117c                    | orf19.7964  |
| CA2844 | IPF13158     | 1.0  | -1.0 | 1.0  | -1.0 | unknown function                                                    |                            | orf19.5729  |
| CA5230 | IPF10424     | 1.1  | -1.1 | -1.0 | -1.0 | unknown function                                                    | YBR216c                    | orf19.5034  |
| CA1657 | IPF16022     | -1.1 | 1.0  | -1.0 | -1.0 | unknown function                                                    |                            | orf19.4325  |
| CA0645 | PF18917.5EOC | 1.0  | 1.1  | -1.0 | -1.0 | unknown function, 5-prime end                                       |                            |             |

|        |              |      |      |      |      |                                                                |                  |             |
|--------|--------------|------|------|------|------|----------------------------------------------------------------|------------------|-------------|
| CA3100 | IPF6594      | -1.0 | 1.0  | 1.1  | -1.0 | unknown function                                               |                  | orf19.3863  |
| CA0169 | RBT7         | -1.0 | 1.0  | 1.1  | -1.0 | repressed by TUP1                                              |                  | orf19.10196 |
| CA1035 | IFI2.3F      | -1.1 | -1.1 | -1.2 | -1.0 | unknown function, 3-prime end                                  |                  | orf19.1038  |
| CA1352 | VCX1         | 1.1  | -1.1 | 1.1  | -1.0 | Ca2+-transport by homology                                     | YDL128w          | orf19.405   |
| CA6138 | IPF4351      | -1.1 | -1.0 | -1.1 | -1.0 | unknown function                                               | YBR083w          | orf19.5908  |
| CA5014 | IPF11120     | -1.0 | -1.1 | -1.0 | -1.0 | similar to <i>Saccharomyces cerevisiae</i> Cki1p choline kina  | YLR133w          | orf19.6966  |
| CA4645 | IPF1496      | -1.0 | -1.0 | -1.1 | -1.0 | unknown function                                               |                  | orf19.352   |
| CA1631 | IPF19582     | 1.0  | 1.0  | -1.0 | -1.0 | unknown function                                               | YNL230c          | orf19.1028  |
| CA1057 | IPF17031     | 1.0  | -1.0 | -1.1 | -1.0 | unknown function                                               | YBL057c          | orf19.2544  |
| CA2935 | IPF11521     | 1.0  | -1.2 | -1.2 | -1.0 | unknown function                                               | YMR172w          | orf19.3328  |
| CA3253 | IPF4724      | 1.1  | 1.0  | -1.0 | -1.0 | unknown Function                                               | Missing in array | orf19.11225 |
| CA5724 | NUP116       | -1.0 | 1.0  | 1.1  | -1.0 | nuclear pore protein (by homology)                             | YMR047c          | orf19.7433  |
| CA1529 | SPC105       | -1.1 | -1.0 | -1.1 | -1.0 | Spindle pole body protein (by homology)                        | YGL093w          | orf19.4557  |
| CA3599 | IPF19785     | -1.1 | -1.0 | -1.1 | -1.0 | unknown function                                               | YLR067c          | orf19.4929  |
| CA4790 | IPF3367      | -1.1 | -1.1 | -1.2 | -1.0 | Riboflavin synthase (by homology)                              | YBR256c          | orf19.4024  |
| CA4682 | IPF3687      | 1.0  | 1.1  | -1.2 | -1.0 | similar to <i>Saccharomyces cerevisiae</i> Pan1p actin-cytosl  | YIR006c          | orf19.886   |
| CA5301 | IPF2186      | 1.1  | 1.0  | 1.0  | -1.0 | unknown function                                               |                  | orf19.7166  |
| CA4170 | IPF7784      | -1.0 | 1.1  | 1.1  | -1.0 | unknown function                                               |                  | orf19.2963  |
| CA2706 | IPF11006     | 1.0  | -1.0 | -1.0 | -1.0 | unknown function                                               |                  | orf19.4658  |
| CA1121 | IPF6730      | -1.2 | 1.0  | -1.1 | -1.0 | Unknown function                                               | YLR368w          | orf19.1604  |
| CA4798 | RPN5.3F      | -1.1 | 1.1  | 1.0  | -1.0 | subunit of the regulatory particle of the proteasome, 3-p      | YDL147w          | orf19.4032  |
| CA1695 | RRP42        | 1.0  | -1.1 | -1.1 | -1.0 | rRNA processing protein (by homology)                          | YDL111c          | orf19.5039  |
| CA0646 | IPF19702     | 1.1  | -1.1 | -1.1 | -1.0 | unknown function                                               |                  | orf19.11806 |
| CA3220 | IPF10001     | 1.0  | 1.1  | -1.0 | -1.0 | unknown function                                               |                  | orf19.6194  |
| CA2444 | IPF13883     | -1.1 | -1.0 | -1.1 | -1.0 | Unknown function                                               |                  | orf19.5502  |
| CA2161 | IPF11876     | 1.0  | 1.5  | -1.0 | -1.0 | unknown function                                               |                  | orf19.5295  |
| CA4050 | PF10482.EXON | 1.1  | -1.0 | 1.0  | -1.0 | unknown function, exon 2                                       | YOL114c          | orf19.425   |
| CA1065 | IPF9002      | 1.0  | -1.1 | -1.1 | -1.0 | unknown function                                               |                  | orf19.12108 |
| CA4832 | DAL2         | -1.0 | -1.0 | -1.1 | -1.0 | Allantoinase                                                   | YIR029w          | orf19.2065  |
| CA3289 | HPA3         | 1.0  | 1.0  | 1.1  | -1.0 | histone and other protein acetyltransferase(by homology)       | YEL066w          | orf19.6323  |
| CA5712 | IPF2657      | -1.1 | -1.0 | 1.0  | -1.0 | unknown function                                               | YEL019c          | orf19.7413  |
| CA2535 | NCE11        | -1.0 | -1.0 | 1.1  | -1.0 | involved in non-classical protein export pathway (by hor       | YJL205ca         |             |
| CA0461 | IPF4972      | 1.0  | -1.0 | 1.1  | -1.0 | unknown function                                               | YJR112w          | orf19.2519  |
| CA0922 | IPF12991     | 1.0  | -1.1 | -1.1 | -1.0 | unknown function                                               | YIR005w          | orf19.1045  |
| CA3083 | IPF11262     | -1.0 | -1.1 | -1.1 | -1.0 | unknown function                                               | YDL010w          | orf19.11626 |
| CA2510 | IPF1472      | -1.0 | -1.1 | -1.0 | -1.0 | unknown function                                               |                  | orf19.305   |
| CA1563 | IPF13855     | -1.0 | -1.0 | -1.0 | -1.0 | unknown function                                               |                  | orf19.4713  |
| CA1948 | IPF14022     | -1.0 | -1.0 | 1.0  | -1.0 | ATPase family gene (by homology)                               |                  | orf19.12205 |
| CA2842 | ALK5.3F      | 1.1  | -1.1 | -1.0 | -1.0 | n-alkane-inducible cytochrome P-450, 3-prime end               |                  |             |
| CA3942 | CHL1         | 1.0  | 1.0  | -1.0 | -1.0 | protein of the DEAH box family (by homology)                   | YPL008w          | orf19.2000  |
| CA0975 | IPF18811     | -1.0 | -1.1 | -1.2 | -1.0 | unknown function                                               |                  |             |
| CA5861 | IPF373       | 1.1  | 1.0  | 1.0  | -1.0 | unknown function                                               |                  | orf19.7519  |
| CA6031 | PRO1         | 1.0  | -1.1 | -1.0 | -1.0 | glutamate 5-kinase (by homology)                               | YDR300c          | orf19.7638  |
| CA5400 | KRE62.3F     | -1.0 | -1.0 | -1.0 | -1.0 | Glucan synthase subunit, 3-prime end (by homology)             |                  |             |
| CA1794 | IPF18608.3F  | -1.0 | -1.0 | -1.0 | -1.0 | unknown function, 3-prime end                                  | YIL103w          | orf19.5208  |
| CA4182 | IPF19797     | 1.1  | -1.1 | -1.3 | -1.0 | similar to <i>Saccharomyces cerevisiae</i> Iml1pinvolved in cl | YJR138w          | orf19.10466 |
| CA0964 | IPF9141      | -1.1 | 1.0  | -1.0 | -1.0 | similar to <i>Saccharomyces cerevisiae</i> Ctf4p DNA-directe   | YPR135w          | orf19.6247  |
| CA2173 | IPF18527     | -1.1 | -1.2 | -1.2 | -1.0 | unknown function                                               | YDR108w          | orf19.3764  |
| CA3960 | IPF11236.5F  | -1.0 | 1.0  | -1.0 | -1.0 | similar to <i>Saccharomyces cerevisiae</i> Sec15p componer     | YGL233w          | orf19.1419  |

|        |                 |      |      |      |      |                                                                                             |                            |             |
|--------|-----------------|------|------|------|------|---------------------------------------------------------------------------------------------|----------------------------|-------------|
| CA3352 | IPF16194        | 1.0  | -1.0 | -1.1 | -1.0 | unknown function                                                                            | YMR099c                    | orf19.9501  |
| CA2366 | IPF10373        | 1.0  | -1.0 | 1.0  | -1.0 | unknown function                                                                            | YNL245c                    | orf19.1281  |
| CA3006 | IPF12152        | 1.1  | -1.0 | 1.0  | -1.0 | Unknown function                                                                            | YDL213c                    | orf19.13616 |
| CA3744 | RAD57           | -1.0 | -1.0 | -1.0 | -1.0 | DNA-repair like protein                                                                     | YDR004w                    | orf19.2174  |
| CA2620 | IPF9496         | 1.0  | -1.1 | -1.0 | -1.0 | carnitine O-acetyltransferase (by homology)                                                 | YER024w                    | orf19.2809  |
| CA0918 | IPF17881        | -1.0 | -1.0 | 1.1  | -1.0 | cyclin (by homology)                                                                        | YJL006c                    | orf19.1041  |
| CA6115 | IPF112          | -1.0 | -1.1 | -1.0 | -1.0 | unknown function                                                                            |                            | orf19.5935  |
| CA2764 | QCR7            | 1.1  | -1.3 | -1.3 | -1.0 | ubiquinol--cytochrome-c reductase subunit 7 (by homology)                                   | YDR529c                    | orf19.5629  |
| CA5721 | IPF2443         | -1.1 | -1.2 | -1.1 | -1.0 | similar to <i>Saccharomyces cerevisiae</i> Ost6p N-oligosaccharide transferase              | YML019w                    | orf19.7426  |
| CA3623 | IPF15911        | 1.1  | 1.0  | 1.0  | -1.0 | unknown function                                                                            | Missing in array           | orf19.7838  |
| CA4353 | IPF3645         | -1.1 | -1.1 | -1.0 | -1.0 | similar to <i>Saccharomyces cerevisiae</i> Rit1p initiator tRNA                             | YMR283c                    | orf19.6727  |
| CA1002 | ROK1.3          | -1.0 | 1.0  | 1.1  | -1.0 | RNA helicase, 3-prime end                                                                   | YGL171w                    | orf19.3756  |
| CA4427 | IPF5584         | 1.1  | 1.0  | 1.0  | -1.0 | unknown function                                                                            | YOL022c                    | orf19.5168  |
| CA2721 | IPF4799         | -1.1 | -1.0 | 1.0  | -1.0 | unknown Function                                                                            | YOR138c                    | orf19.3342  |
| CA5224 | IPF3081         | 1.0  | 1.1  | 1.0  | -1.0 | unknown function                                                                            | YLR050c                    | orf19.7043  |
| CA0869 | IPF14772        | -1.1 | -1.0 | 1.0  | -1.0 | unknown function                                                                            | YHL022c                    | orf19.3589  |
| CA6114 | SEN1            | -1.0 | -1.0 | -1.2 | -1.0 | positive effector of tRNA-splicing endonuclease (by homology)                               | YLR430w                    | orf19.5938  |
| CA5917 | IPF8923         | 1.2  | -1.1 | -1.0 | -1.0 | unknown function                                                                            |                            | orf19.6788  |
| CA0867 | IPF14773.EXON 2 | -1.0 | -1.0 | 1.0  | -1.0 | unknown function, exon 2                                                                    |                            | orf19.3586  |
| CA4988 | RPN2            | -1.3 | 1.1  | -1.1 | -1.0 | Proteasome regulatory subunit (by homology)                                                 | YIL075c                    | orf19.5260  |
| CA2715 | CTF8            | 1.0  | 1.0  | -1.0 | -1.0 | putative) kinetochore protein (by homology)                                                 | YHR191c                    | orf19.576   |
| CA5343 | RPL4B           | -1.1 | 1.1  | 1.0  | -1.0 | Ribosomal protein L4B (by homology)                                                         | YDR012w                    | orf19.7217  |
| CA4211 | IPF5052         | -1.0 | -1.1 | -1.1 | -1.0 | RNA-binding protein (by homology)                                                           | YOL041c                    | orf19.809   |
| CA0422 | IPF9046         | 1.0  | -1.0 | -1.1 | -1.0 | unknown function                                                                            |                            | orf19.2231  |
| CA3581 | IPF16143        | 1.0  | -1.0 | -1.1 | -1.0 | unknown function                                                                            |                            | orf19.2259  |
| CA3725 | TOK1.3          | -1.1 | -1.0 | 1.1  | -1.0 | Outward-rectifier potassium channel, 3-prime end (by homology)                              | YJL093c                    | orf19.4175  |
| CA4976 | IPF4708         | 1.0  | -1.0 | 1.0  | -1.0 | unknown Function                                                                            | YOL072w                    | orf19.5276  |
| CA1202 | DBP3            | 1.0  | -1.1 | -1.1 | -1.0 | ATP-dependent RNA helicase (HELICASE CA3) by homology                                       | YGL078c                    | orf19.12334 |
| CA0779 | IPF20065        | -1.0 | 1.0  | -1.0 | -1.0 | similar to <i>Saccharomyces cerevisiae</i> Yku70p high-affinity RNA binding protein         | YMR284w                    | orf19.3491  |
| CA4834 | IPF1217         | -1.0 | -1.0 | -1.0 | -1.0 | unknown function                                                                            |                            | orf19.2063  |
| CA5586 | IPF5625         | -1.0 | -1.1 | -1.1 | -1.0 | unknown function                                                                            |                            | orf19.7112  |
| CA5667 | IPF1259         | -1.0 | 1.0  | -1.0 | -1.0 | Conserved hypothetical protein                                                              | YML005w                    | orf19.7369  |
| CA5484 | RAD1.3F         | -1.2 | -1.1 | 1.1  | -1.0 | UV endonuclease, component of the nucleotide excision repair complex                        | YPL022w                    | orf19.5318  |
| CA2463 | IPF8730         | -1.0 | 1.0  | -1.0 | -1.0 | unknown function                                                                            | YGR223c                    | orf19.1793  |
| CA0500 | IPF20058        | -1.1 | -1.1 | -1.0 | -1.0 | unknown function                                                                            | YOR252w                    | orf19.4793  |
| CA1039 | IPF4012         | 1.2  | -1.1 | 1.0  | -1.0 | Unknown Function                                                                            | YPL221w                    | orf19.2501  |
| CA2253 | IPF15485        | -1.0 | -1.1 | -1.1 | -1.0 | unknown function                                                                            | YHL013c                    | orf19.1959  |
| CA2662 | IPF17139        | -1.0 | 1.1  | 1.1  | -1.0 | unknown function                                                                            | YKR081c ; Missing in array | orf19.3553  |
| CA2419 | IPF14379        | -1.0 | 1.1  | -1.0 | -1.0 | unknown function                                                                            | YNL155w                    | orf19.4474  |
| CA1071 | IPF16624        | 1.1  | 1.1  | 1.0  | -1.0 | unknown function                                                                            | YBL051c                    | orf19.2534  |
| CA0679 | 885.REPEAT1     | 1.0  | 1.1  | 1.1  | -1.0 | unknown function, 5-prime end                                                               |                            |             |
| CA1967 | IPF10866        | 1.0  | 1.1  | 1.2  | -1.0 | similar to <i>Saccharomyces cerevisiae</i> Ira2p GTPase-activating protein                  | YOL081w                    | orf19.5219  |
| CA5453 | IPF256          | 1.1  | 1.1  | 1.0  | -1.0 | control of gene expression (by homology)                                                    | YKL088w                    | orf19.3260  |
| CA4392 | IPF12303        | 1.0  | 1.0  | 1.0  | -1.0 | glutathione-S-transferase (by homology)                                                     |                            | orf19.3121  |
| CA2485 | PAP12           | -1.1 | -1.0 | -1.0 | -1.0 | poly(A) polymerase                                                                          | Missing in array           | orf19.10713 |
| CA3810 | IPF9230         | -1.0 | 1.0  | -1.1 | -1.0 | similar to <i>Saccharomyces cerevisiae</i> Ste3p pheromone response element binding protein | YKL178c                    | orf19.2492  |
| CA3093 | TOF1            | -1.1 | -1.0 | -1.1 | -1.0 | Topoisomerase I interacting factor 1 (by homology)                                          | YNL273w                    | orf19.11613 |
| CA0858 | IPF14493        | -1.0 | -1.0 | -1.0 | -1.0 | unknown function                                                                            |                            | orf19.4465  |
| CA3919 | IFC5            | 1.0  | 1.0  | 1.0  | -1.0 | unknown function                                                                            |                            | orf19.5121  |

|        |             |      |      |      |      |                                                                |                            |             |
|--------|-------------|------|------|------|------|----------------------------------------------------------------|----------------------------|-------------|
| CA3850 | IPF7932     | 1.1  | -1.2 | -1.1 | -1.0 | similar to <i>Saccharomyces cerevisiae</i> Etf-beta electron-t | YGR207c                    | orf19.6612  |
| CA5328 | RER1        | -1.1 | -1.0 | 1.1  | -1.0 | Required for correct localization of Sec12p (by homolog        | YCL001w                    | orf19.7202  |
| CA1243 | IPF7922     | -1.0 | -1.0 | -1.0 | -1.0 | unknown function                                               | YNL236w                    | orf19.8923  |
| CA2255 | CYC3        | 1.0  | -1.1 | 1.0  | -1.0 | cytochrome C heme lyase                                        | YAL039c                    | orf19.1957  |
| CA5651 | KIP3        | -1.1 | -1.1 | -1.0 | -1.0 | Kinesin-related protein required for nuclear migration (b      | YGL216w                    | orf19.7353  |
| CA3597 | BNI1        | -1.1 | -1.0 | -1.2 | -1.0 | regulator of budding (by homology)                             | YNL271c                    | orf19.4927  |
| CA4996 | IPF2029     | 1.0  | -1.0 | -1.0 | -1.0 | unknown function                                               |                            | orf19.5251  |
| CA0327 | IPF15217.5F | -1.1 | -1.0 | -1.1 | -1.0 | WD-repeat protein, 5-prime end (by homology)                   |                            | orf19.3779  |
| CA3858 | TRP1        | -1.1 | 1.0  | 1.1  | -1.0 | phosphoribosylanthranilate isomerase                           | YDR007w                    | orf19.6096  |
| CA1266 | SAP8        | 1.0  | -1.0 | 1.0  | -1.0 | aspartic protease                                              |                            | orf19.242   |
| CA4812 | IPF1171     | 1.0  | -1.1 | -1.0 | -1.0 | Putative synaptobrevin (by homology)                           | YLR093c                    | orf19.2089  |
| CA0374 | IFK3        | -1.0 | -1.0 | -1.0 | -1.0 | Probable monooxygenase (by homology)                           |                            | orf19.8477  |
| CA6051 | IPF4940     | 1.0  | 1.0  | -1.0 | -1.0 | unknown function                                               | YOR126c                    | orf19.7667  |
| CA1170 | IPF13268    | -1.1 | -1.0 | -1.1 | -1.0 | unknown function                                               | YDR132c                    | orf19.2749  |
| CA4626 | MRS7        | -1.1 | -1.1 | -1.2 | -1.0 | suppressor splicing defects (by homology)                      | YOL027c                    | orf19.10831 |
| CA2432 | COQ3        | 1.1  | 1.0  | 1.1  | -1.0 | 3,4-dihydroxy-5-hexaprenylbenzoate methyltransferase           | YOL096c                    | orf19.3400  |
| CA3085 | IPF17086    | -1.1 | -1.1 | -1.1 | -1.0 | unknown function                                               |                            | orf19.4148  |
| CA2566 | IPF12122    | -1.1 | 1.0  | 1.0  | -1.0 | unknown function                                               | YPL034w                    | orf19.5646  |
| CA0801 | CHC1        | 1.4  | 1.1  | 1.1  | -1.0 | clathrin heavy chain (by homology)                             | YGL206c                    | orf19.3496  |
| CA4502 | IPF10391    | -1.0 | 1.1  | -1.0 | -1.0 | Similar to dnaJ proteins                                       | YNL064c                    | orf19.8136  |
| CA6044 | IPF4928     | -1.0 | -1.1 | -1.1 | -1.0 | similar to <i>Saccharomyces cerevisiae</i> Sac2p suppressor    | YDR484w                    | orf19.7660  |
| CA5867 | EPL1        | 1.0  | -1.0 | -1.0 | -1.0 | DNA-binding protein (by homology)                              | YFL024c ; Missing in array | orf19.7529  |
| CA3278 | RPS3        | 1.1  | -1.2 | -1.3 | -1.0 | Ribosomal protein S3.e (by homology)                           | YNL178w                    | orf19.6312  |
| CA4760 | IPF9652     | 1.0  | 1.0  | -1.1 | -1.0 | unknown function                                               | YJL011c ; Missing in array | orf19.3990  |
| CA3461 | CFL2        | 1.0  | 1.0  | -1.1 | -1.0 | ferric reductase (by homology)                                 |                            | orf19.1264  |
| CA3755 | IPF17743    | -1.0 | -1.0 | -1.2 | -1.0 | Unknown function                                               | YBL093c                    |             |
| CA0539 | NUP57       | 1.0  | -1.0 | 1.1  | -1.0 | nuclear pore protein (by homology)                             | YGR119c                    | orf19.2820  |
| CA0624 | IPF312      | -1.1 | -1.1 | -1.1 | -1.0 | unknown function                                               | YJR080c                    | orf19.3154  |
| CA4738 | IPF4500     | -1.0 | -1.0 | -1.0 | -1.0 | putative GTP-binding protein (by homology)                     | YGR210c                    | orf19.4846  |
| CA4691 | IPF3958     | 1.1  | -1.0 | -1.0 | -1.0 | unknown function                                               |                            | orf19.874   |
| CA5298 | SUI3        | -1.0 | 1.1  | -1.0 | -1.0 | Translation initiation factor eIF2 beta subunit (by homolo     | YPL237w                    | orf19.7161  |
| CA5406 | IPF1547     | -1.1 | -1.1 | -1.1 | -1.0 | unknown function                                               |                            | orf19.949   |
| CA5106 | AFG2        | 1.0  | -1.1 | -1.0 | -1.0 | Member of the Sec18p, Pas1p, Cdc48p, TBP-1 family o            | YLR397c                    | orf19.6432  |
| CA1881 | RCK2        | -1.1 | -1.1 | -1.1 | -1.0 | Ca/calmodulin-dependent ser/thr protein                        | kin; YLR248w               | orf19.9808  |
| CA4006 | IPF4253     | -1.1 | -1.1 | -1.1 | -1.0 | unknown function                                               | YML017w                    | orf19.1630  |
| CA2312 | IPF16498    | -1.1 | -1.0 | -1.0 | -1.0 | similar to <i>Saccharomyces cerevisiae</i> Arg82p arginine m   | YDR173c                    | orf19.1377  |
| CA3872 | MRPL28      | 1.0  | -1.0 | -1.2 | -1.0 | mitochondrial ribosomal protein of the large subunit (by       | YDR462w                    | orf19.397   |
| CA3012 | IPF14013    | -1.0 | -1.1 | -1.1 | -1.0 | unknown function                                               |                            | orf19.6227  |
| CA4794 | SQT1        | 1.1  | 1.1  | -1.0 | -1.0 | suppresses dominant-negative mutants of the rib                | YIR012w                    | orf19.4029  |
| CA5792 | IPF4195     | -1.0 | -1.1 | -1.1 | -1.0 | similar to <i>Saccharomyces cerevisiae</i> Ulp2p involved in t | YIL031w                    | orf19.5441  |
| CA1226 | IPF15660    | 1.1  | -1.0 | 1.0  | -1.0 | putative mitochondrial carrier (by homology)                   | YMR166c                    | orf19.4159  |
| CA5547 | IPF5981     | -1.1 | -1.1 | -1.2 | -1.0 | similar to <i>Saccharomyces cerevisiae</i> Gin3p (by homolo    | YML128c                    | orf19.7310  |
| CA5410 | IPF1557     | -1.1 | -1.1 | -1.2 | -1.0 | similar to dnaJ proteins                                       | YLR090w                    | orf19.954   |
| CA1081 | IPF14797.3  | 1.3  | 1.0  | 1.1  | -1.0 | unknown function, 3-prime end                                  |                            |             |
| CA3891 | BUD6        | -1.1 | -1.1 | -1.1 | -1.0 | bud site selection protein (by homology)                       | YLR319c                    | orf19.5087  |
| CA2155 | IPF7903     | -1.0 | -1.0 | -1.0 | -1.0 | unknown function                                               | YPL255w                    | orf19.6027  |
| CA3029 | IPF13825    | -1.3 | 1.0  | -1.1 | -1.0 | similarity to serine/threonine protein kinases (by homolo      | YNR047w                    | orf19.223   |
| CA2927 | RAD52       | 1.0  | -1.0 | 1.0  | -1.0 | Nuclear ribonucleoprotein E                                    | YML032c                    | orf19.4208  |
| CA4087 | IPF5013     | -1.0 | -1.1 | -1.1 | -1.0 | similar to <i>Saccharomyces cerevisiae</i> Mct1p malonyl-Co.   | YOR221c                    | orf19.6643  |



|        |              |      |      |      |      |                                                                                                   |         |             |
|--------|--------------|------|------|------|------|---------------------------------------------------------------------------------------------------|---------|-------------|
| CA0209 | HAP2         | 1.0  | 1.1  | 1.0  | -1.0 | CCAAT-binding factor subunit (by homology)                                                        | YGL237c | orf19.1228  |
| CA0423 | IPF15273     | -1.1 | -1.1 | -1.2 | -1.0 | unknown function                                                                                  |         | orf19.9381  |
| CA4845 | IPF6945.5F   | -1.0 | -1.0 | -1.1 | -1.0 | unknown function, 5-prime end                                                                     |         | orf19.3813  |
| CA4859 | IPF15927.5F  | -1.1 | -1.1 | -1.2 | -1.0 | similar to <i>Saccharomyces cerevisiae</i> Tfc3p transcription                                    | YAL001c | orf19.3833  |
| CA5120 | YDJ1         | -1.1 | -1.1 | -1.1 | -1.0 | Mitochondrial and ER import protein (by homology)                                                 |         | orf19.6408  |
| CA1294 | MSH5.3F      | 1.0  | -1.0 | 1.0  | -1.0 | Meiosis-specific protein, 3-prime end (by homology)                                               | YDL154w | orf19.10228 |
| CA4583 | IPF2229      | -1.1 | -1.1 | -1.0 | -1.0 | unknown function                                                                                  | YOR173w | orf19.6901  |
| CA3776 | IPF10435     | -1.0 | -1.0 | -1.0 | -1.0 | unknown function                                                                                  |         | orf19.2890  |
| CA1976 | IPF9582      | 1.1  | -1.1 | -1.2 | -1.0 | similar to <i>Saccharomyces cerevisiae</i> Mrps18p ribosome                                       | YNL306w | orf19.688   |
| CA2886 | IPF7207      | -1.1 | -1.0 | -1.0 | -1.0 | unknown function                                                                                  | YML127w | orf19.2473  |
| CA5271 | IPF1777      | -1.0 | -1.1 | -1.0 | -1.0 | similar to <i>Saccharomyces cerevisiae</i> Mpt5p multicopy s                                      | YGL178w | orf19.4991  |
| CA3568 | IPF7804.3F   | -1.1 | -1.1 | -1.2 | -1.0 | unknown function, 3-prime end                                                                     | YML013w | orf19.3135  |
| CA0758 | PAP11        | -1.1 | -1.0 | -1.0 | -1.0 | poly(A) polymerase by homology to <i>S. cerevisiae</i>                                            | YKR002w | orf19.3197  |
| CA3248 | IPF15834     | 1.0  | 1.0  | 1.0  | -1.0 | unknown function                                                                                  |         | orf19.4675  |
| CA5281 | SPT6         | 1.1  | 1.1  | -1.1 | -1.0 | Transcription elongation protein (by homology)                                                    | YGR116w | orf19.7136  |
| CA0669 | IPF5918      | -1.1 | -1.1 | -1.1 | -1.0 | unknown function                                                                                  | YOR042w | orf19.448   |
| CA1704 | SOL3         | 1.1  | -1.2 | -1.3 | -1.0 | weak multicopy suppressor of los1-1 (by homology)                                                 | YHR163w | orf19.704   |
| CA0861 | CRK1.3F      | -1.1 | -1.1 | -1.3 | -1.0 | Protein kinase, 3-prime end                                                                       |         | orf19.3523  |
| CA1318 | IPF3147      | -1.0 | -1.1 | -1.1 | -1.0 | Nuclear valosin-containing protein-like (by homology)                                             | YLL034c | orf19.4219  |
| CA5978 | SPT7         | -1.1 | -1.1 | -1.3 | -1.0 | transcription factor, member of the histone acetyltransferase                                     | YBR081c | orf19.7572  |
| CA5026 | IPF3001      | 1.0  | -1.0 | -1.0 | -1.0 | serine/threonine protein kinase (by homology)                                                     |         | orf19.6980  |
| CA5683 | IPF3333      | 1.0  | -1.0 | -1.0 | -1.0 | unknown function                                                                                  | YPL054w | orf19.7385  |
| CA4193 | IPF7535      | -1.1 | 1.1  | 1.1  | -1.0 | unknown function                                                                                  | YBR273c | orf19.4534  |
| CA4559 | IPF8041      | 1.2  | -1.0 | -1.1 | -1.0 | putative mitochondrial inner membrane protease (by homology)                                      |         | orf19.6869  |
| CA1870 | PF16981.EXON | -1.1 | -1.2 | -1.2 | -1.0 | unknown function, exon 2                                                                          |         | orf19.9994  |
| CA2304 | PRP43        | -1.0 | -1.0 | -1.1 | -1.0 | RNA-dependent ATPase (by homology)                                                                | YGL120c | orf19.1687  |
| CA3124 | IPF5353.3    | -1.1 | 1.2  | -1.3 | -1.0 | unknown function, 3-prime end                                                                     | YML072c | orf19.3003  |
| CA5280 | IPF1899      | 1.2  | -1.0 | 1.0  | -1.0 | unknown function                                                                                  | YHL021c | orf19.7131  |
| CA0243 | BSD2         | -1.1 | -1.1 | -1.1 | -1.0 | Metal homeostasis protein (by homology)                                                           | YBR290w | orf19.5869  |
| CA2342 | IPF13836     | 1.1  | -1.1 | 1.0  | -1.0 | probable heat shock protein (by homology)                                                         |         | orf19.2344  |
| CA2636 | MSW1         | -1.0 | -1.0 | 1.0  | -1.0 | Mitochondrial tryptophanyl-tRNA synthetase (by homology)                                          | YDR268w | orf19.4299  |
| CA5700 | IPF2630      | -1.0 | 1.0  | -1.1 | -1.0 | unknown function                                                                                  |         |             |
| CA3218 | IPF10005     | 1.0  | -1.1 | -1.1 | -1.0 | unknown function                                                                                  |         | orf19.6196  |
| CA5095 | ARF21        | -1.1 | -1.1 | -1.0 | -1.0 | GTP-binding protein of the ARF family (by homology)                                               |         | orf19.6447  |
| CA5495 | SGS1         | 1.0  | 1.1  | -1.1 | -1.0 | ATP-dependent DNA helicase (by homology)                                                          | YMR190c | orf19.5335  |
| CA3752 | TIF51.3      | 1.2  | -1.2 | -1.2 | -1.0 | translation initiation factor eIF-5A, 3-prime end                                                 | YEL034w | orf19.3426  |
| CA4051 | PF10231.EXON | -1.1 | -1.0 | -1.1 | -1.0 | similar to <i>Saccharomyces cerevisiae</i> Rif1p Rap1p-interacting factor 1, exon 1 (by homology) |         | orf19.426   |
| CA1458 | IPF6342      | 1.0  | -1.0 | 1.0  | -1.0 | unknown function                                                                                  |         | orf19.1106  |
| CA2567 | SUB2.3F      | -1.1 | -1.1 | 1.0  | -1.0 | Involved in pre-mRNA splicing, 3-prime end (by homology)                                          | YDL084w | orf19.5647  |
| CA2362 | IPF10595     | 1.0  | -1.1 | -1.0 | -1.0 | unknown function                                                                                  |         | orf19.1287  |
| CA3080 | IPF14634     | -1.0 | -1.0 | -1.1 | -1.0 | APP-binding protein 1 (by homology)                                                               | YPL003w | orf19.4153  |
| CA3947 | IPF14768     | -1.1 | -1.0 | -1.0 | -1.0 | unknown function                                                                                  |         | orf19.1994  |
| CA3927 | DIP2         | -1.0 | -1.1 | -1.1 | -1.0 | beta transducin                                                                                   | YLR129w | orf19.5106  |
| CA2006 | IPF11801     | -1.2 | -1.1 | -1.2 | -1.0 | unknown function                                                                                  | YDR332w | orf19.2798  |
| CA5172 | CPS2.5F      | 1.0  | -1.0 | -1.0 | -1.0 | Carboxypeptidase YSCS precursor, 5-prime end                                                      |         | orf19.4610  |
| CA2655 | IPF8477      | 1.1  | -1.1 | -1.0 | -1.0 | unknown function                                                                                  | YGR150c | orf19.5704  |
| CA6123 | RPS15.3      | 1.0  | -1.2 | -1.2 | -1.0 | 40S ribosomal protein S15, 3-prime end (by homology)                                              | YOL040c | orf19.5927  |
| CA1208 | IPF17195     | -1.1 | -1.0 | -1.1 | -1.0 | unknown function                                                                                  |         | orf19.11255 |
| CA3941 | IPF4754      | -1.0 | -1.0 | -1.1 | -1.0 | unknown function                                                                                  |         | orf19.2001  |

|              |            |      |      |      |      |                                                             |                            |             |
|--------------|------------|------|------|------|------|-------------------------------------------------------------|----------------------------|-------------|
| CA0253       | FIL1       | 1.0  | 1.0  | -1.0 | -1.0 | Putative mitochondrial ribosome recycling factor (by hor    | YHR038w                    | orf19.477   |
| CA2552       | ALG5       | -1.0 | -1.1 | -1.1 | -1.0 | dolichol-P-glucose synthetase (by homology)                 | YPL227c                    | orf19.2837  |
| CA5970       | DPB2       | -1.0 | -1.0 | -1.1 | -1.0 | DNA-directed DNA polymerase epsilon, subunit B (by h        | YPR175w                    | orf19.7564  |
| CA4047       | IPF9206    | -1.1 | -1.0 | 1.0  | -1.0 | unknown function                                            |                            | orf19.3678  |
| CA5577       | IPF12537   | 1.0  | -1.0 | -1.0 | -1.0 | unknown function                                            | YPR179c                    | orf19.7344  |
| CA4694       | IPF3950    | -1.0 | 1.0  | 1.0  | -1.0 | unknown function                                            |                            | orf19.8490  |
| CA1089       | IPF13799   | -1.1 | -1.1 | -1.1 | -1.0 | unknown function                                            | YJR084w                    | orf19.3945  |
| CA0401       | RTA1       | -1.0 | -1.0 | 1.0  | -1.0 | unknown function                                            |                            | orf19.6224  |
| CA5772       | ESA1       | -1.0 | 1.0  | 1.0  | -1.0 | Histone acetyltransferase (by homology)                     | YOR244w                    | orf19.5416  |
| CA5958       | PIB1       | -1.1 | 1.0  | -1.0 | -1.0 | phosphatidylinositol(3)-phosphate binding protein (by hc    | YDR313c                    | orf19.7547  |
| CA2880       | IPF3781    | -1.1 | -1.0 | 1.0  | -1.0 | unknown function                                            | YPL133c                    | orf19.5849  |
| CA2052       | IPF11027   | -1.0 | -1.0 | -1.1 | -1.0 | unknown function                                            | YDR026c                    | orf19.5722  |
| CA2199       | IPF8113    | -1.3 | -1.1 | -1.1 | -1.0 | unknown function                                            | YLR077w                    | orf19.2938  |
| CA0734       | IPF8996    | 1.1  | -1.0 | 1.0  | -1.0 | unknown function                                            | YGL211w                    | orf19.4634  |
| CA5428       | BOI2       | -1.1 | -1.1 | -1.2 | -1.0 | budding protein (by homology)                               | YER114c                    | orf19.3230  |
| CA4840       | IPF1235    | 1.0  | -1.0 | -1.0 | -1.0 | unknown function                                            |                            | orf19.2054  |
| CA2613       | IPF5446    | 1.2  | 1.0  | 1.1  | -1.0 | putative ribosomal protein (by homology)                    | YDR116c                    | orf19.5698  |
| CA0774       | IPF11974   | 1.0  | -1.0 | 1.0  | -1.0 | unknown function                                            |                            | orf19.855   |
| CA1435       | IPF7166    | -1.0 | -1.0 | -1.0 | -1.0 | unknown function                                            |                            | orf19.1202  |
| CA2641       | IPF2929    | 1.1  | 1.1  | 1.0  | -1.0 | unknown function                                            | YJR024c                    | orf19.4306  |
| CA2305       | MPA43      | -1.1 | -1.0 | -1.1 | -1.0 | Unknown function                                            | YNL249c                    | orf19.1686  |
| CA1375       | IPF7158    | 1.0  | 1.1  | -1.0 | -1.0 | putative serine/threonine kinase                            | YDR466w                    | orf19.8787  |
| CA2041       | IPF12944   | 1.0  | -1.0 | -1.1 | -1.0 | unknown function                                            |                            |             |
| CA2105       | IPF10711   | -1.1 | -1.0 | -1.1 | -1.0 | unknown function                                            |                            | orf19.3694  |
| CA3503       | IPF15890   | -1.1 | 1.0  | 1.0  | -1.0 | cytoskeletal binding protein (by homology)                  |                            | orf19.6349  |
| CA2519       | SRP72      | -1.1 | -1.1 | -1.1 | -1.0 | signal recognition particle protein SRP72 (by homology)     | YPL210c                    | orf19.5516  |
| CA2789       | IPF3567    | -1.0 | -1.1 | -1.2 | -1.0 | unknown function                                            | YLR352w ; Missing in array | orf19.606   |
| Human c Myc2 |            | -1.1 | -1.1 | -1.0 | -1.0 |                                                             |                            |             |
| CA4090       | BRF1       | -1.1 | -1.1 | -1.1 | -1.0 | TFIIIB subunit                                              | YGR246c                    | orf19.6649  |
| CA0556       | IPF15920   | -1.0 | 1.0  | 1.1  | -1.0 | zinc-finger containing protein (by homology)                |                            | orf19.4972  |
| CA5866       | IPF361     | -1.1 | 1.0  | -1.1 | -1.0 | unknown function                                            | Missing in array           | orf19.7527  |
| CA4421       | TAF19      | -1.0 | 1.0  | 1.0  | -1.0 | TBP-associated factor by homology                           | YML098w                    | orf19.5174  |
| CA2039       | IPF12947   | -1.0 | -1.1 | -1.0 | -1.0 | unknown function                                            | YMR115w                    | orf19.11835 |
| CA3920       | SDS24      | -1.0 | -1.0 | -1.1 | -1.0 | Similar to S. cerevisiae YBR214w which presents strong      | YBR214w                    | orf19.5118  |
| CA5702       | PCH1       | -1.3 | 1.1  | -1.1 | -1.0 | Putative ATPase (by homology)                               | YDR440w                    | orf19.7402  |
| CA2976       | IPF14676   | -1.2 | -1.2 | -1.1 | -1.0 | unknown function                                            | YIL041w                    | orf19.8821  |
| CA4681       | IPF3679    | -1.1 | -1.1 | -1.2 | -1.0 | similar to Saccharomyces cerevisiae Thi20p hydroxyme        | YOL055c                    | orf19.889   |
| CA0634       | IPF16267   | 1.0  | -1.1 | -1.1 | -1.0 | unknown function                                            | YER077c                    | orf19.1772  |
| CA3196       | IPF3428    | -1.0 | -1.1 | -1.1 | -1.0 | unknown function                                            | YLR051c                    | orf19.6175  |
| CA3529       | IPF9929    | -1.0 | -1.1 | -1.2 | -1.0 | unknown function                                            | YEL043w                    | orf19.8600  |
| CA2028       | IPF18561.3 | -1.1 | 1.1  | -1.1 | -1.0 | unknown function, , 3-prime end                             |                            |             |
| CA2816       | IPF5601    | -1.1 | -1.0 | -1.1 | -1.0 | unknown function                                            | YKL183w                    | orf19.2995  |
| CA1072       | SBH1       | -1.1 | -1.0 | -1.0 | -1.0 | involved in translocation into the ER (by homology)         | YER087ca                   |             |
| CA2501       | IPF6812    | 1.0  | -1.0 | -1.0 | -1.0 | unknown function                                            | YLR224w                    | orf19.5587  |
| CA6054       | IPF4952    | 1.0  | -1.0 | 1.1  | -1.0 | unknown function                                            | YDR411c                    | orf19.7672  |
| CA1034       | BET4.EXON2 | -1.0 | -1.0 | -1.0 | -1.0 | alpha subunit of geranylgeranyl transferase type 2, exor    | YJL031c                    | orf19.8641  |
| CA5326       | IPF2137    | 1.1  | -1.1 | -1.1 | -1.0 | unknown function                                            |                            | orf19.7200  |
| CA3286       | UBP3.3EOC  | 1.0  | 1.0  | 1.0  | -1.0 | Ubiquitin-specific proteinase, 3-prime end (by homology)    | YER151c                    | orf19.6319  |
| CA4761       | IPF9650    | -1.2 | -1.0 | -1.2 | -1.0 | lipase family protein containing serine active site (by hoi | YGL144c                    | orf19.3991  |

|        |              |      |      |      |      |                                                                                        |                  |             |
|--------|--------------|------|------|------|------|----------------------------------------------------------------------------------------|------------------|-------------|
| CA3405 | IPF8644      | 1.0  | 1.0  | 1.0  | -1.0 | maltase (by homology)                                                                  | YGR287c          | orf19.3982  |
| CA1025 | IPF10184     | 1.1  | 1.0  | -1.1 | -1.0 | unknown function                                                                       | YPL110c          | orf19.3936  |
| CA4732 | IPF7733      | -1.1 | -1.1 | -1.0 | -1.0 | unknown function                                                                       | YCR063w          | orf19.4855  |
| CA4172 | IPF4432      | -1.0 | -1.1 | -1.0 | -1.0 | unknown function                                                                       |                  | orf19.2961  |
| CA4407 | RPO31        | 1.1  | -1.1 | -1.2 | -1.0 | DNA-directed RNA polymerase III (by homology)                                          | YOR116c          | orf19.3103  |
| CA4221 | IPF8760      | -1.1 | 1.1  | 1.0  | -1.0 | unknown function                                                                       |                  | orf19.823   |
| CA5814 | IPF2521      | -1.0 | 1.0  | -1.0 | -1.0 | putative protease (by homology)                                                        | YCR045c          | orf19.7463  |
| CA2341 | IPF13838     | -1.1 | 1.0  | 1.0  | -1.0 | unknown function                                                                       | YPL222w          | orf19.2346  |
| CA1514 | IPF7539      | -1.1 | 1.0  | -1.1 | -1.0 | unknown function                                                                       |                  | orf19.4886  |
| NAD6   |              | -1.0 | -1.1 | -1.1 | -1.0 |                                                                                        |                  |             |
| CA5538 | IPF2830      | -1.1 | -1.0 | -1.1 | -1.0 | unknown function                                                                       |                  | orf19.7300  |
| CA5608 | IPF539       | -1.1 | -1.1 | -1.2 | -1.0 | unknown function                                                                       | YLR290c          | orf19.7092  |
| CA5398 | SEC14        | -1.0 | -1.2 | -1.1 | -1.0 | phosphatidylinositol(PI)/phosphatidylcholine(PC) transfe                               | YMR079w          | orf19.941   |
| CA2667 | IPF16996     | -1.2 | -1.1 | -1.1 | -1.0 | unknown function                                                                       | YDR496c          | orf19.3547  |
| CA0647 | IPF19706     | 1.0  | -1.0 | -1.0 | -1.0 | unknown function                                                                       | Missing in array | orf19.4334  |
| CA3951 | VAC7.3       | 1.0  | -1.1 | -1.1 | -1.0 | Vacuolar protein, 3-prime end (by homology)                                            | YNL054w          | orf19.1409  |
| CA2600 | IPF11177     | -1.3 | -1.2 | -1.4 | -1.0 | similar to <i>Saccharomyces cerevisiae</i> Clu1p translation ii                        | YMR012w          | orf19.51    |
| CA1345 | IPF6003      | -1.3 | 1.0  | 1.1  | -1.0 | similar to <i>Saccharomyces cerevisiae</i> Msb2p multicopy s                           | YGR014w          | orf19.1490  |
| CA2257 | SHR5         | 1.0  | 1.0  | -1.0 | -1.0 | RAS suppressor (by homology)                                                           | YOL110w          | orf19.1955  |
| CA3995 | PF11615.3EOC | -1.0 | -1.0 | -1.0 | -1.0 | RNA-binding protein (by homology)                                                      |                  |             |
| CA5457 | TRM1         | -1.1 | -1.0 | -1.1 | -1.1 | N2,N2-dimethylguanine tRNA methyltransferase (by ho                                    | YDR120c          | orf19.3265  |
| CA2962 | PRP2         | -1.1 | -1.1 | -1.1 | -1.1 | RNA-dependent ATPase (by homology)                                                     | YNR011c          | orf19.5865  |
| CA1209 | ARG8         | -1.0 | -1.0 | -1.1 | -1.1 | acetylornithine aminotransferase (by homology)                                         | YOL140w          | orf19.11254 |
| CA0543 | IPF3255      | -1.1 | -1.1 | -1.1 | -1.1 | similar to <i>Saccharomyces cerevisiae</i> Vps5p involved in                           | YOR069w          | orf19.2867  |
| CA3055 | HIR2         | -1.2 | -1.1 | -1.1 | -1.1 | Histone transcription regulator (by homology)                                          | YOR038c          | orf19.11771 |
| CA1026 | PF19645.EXON | 1.0  | 1.0  | 1.1  | -1.1 | unknown function, exon 1                                                               |                  | orf19.3937  |
| CA3254 | IPF4728      | 1.0  | 1.0  | -1.0 | -1.1 | unknown Function                                                                       |                  | orf19.11227 |
| CA0784 | YUH1.3       | 1.1  | -1.0 | -1.0 | -1.1 | Putative ubiquitin carboxyl-terminal hydrolase-like protein, 3-prime end (by homology) |                  | orf19.3930  |
| CA3523 | IPF20135     | -1.1 | -1.0 | -1.1 | -1.1 | unknown function                                                                       |                  | orf19.993   |
| CA2448 | PLC1         | -1.1 | -1.1 | -1.1 | -1.1 | 1-phosphatidylinositol-4,5-bisphosphate phosphodiester                                 | YPL268w          | orf19.5506  |
| CA4899 | IPF1460      | -1.0 | -1.0 | 1.0  | -1.1 | unknown function                                                                       | YLR039c          | orf19.6036  |
| CA2357 | IPF8957      | -1.1 | -1.0 | -1.1 | -1.1 | unknown function                                                                       | YER010c          | orf19.4894  |
| CA0414 | IPF4068      | -1.2 | -1.1 | -1.2 | -1.1 | reverse transcriptase                                                                  |                  | orf19.2164  |
| CA0011 | IPF17430     | -1.0 | -1.0 | -1.2 | -1.1 | possible zinc protease (by homology)                                                   | YIL137c          | orf19.73    |
| CA5650 | IPF7109      | 1.1  | -1.0 | -1.1 | -1.1 | unknown function                                                                       | YNL208w          | orf19.7350  |
| CA3216 | IPF13038     | -1.1 | -1.0 | 1.0  | -1.1 | unknown function                                                                       | YKL018ca         |             |
| CA3299 | IPF13777     | -1.0 | 1.0  | -1.0 | -1.1 | unknown function                                                                       |                  | orf19.2317  |
| CA0001 | IPF19501     | 1.1  | 1.0  | 1.0  | -1.1 | unknown function                                                                       | Missing in array |             |
| CA1391 | IPF6151      | -1.0 | -1.0 | -1.1 | -1.1 | unknown function                                                                       |                  |             |
| CA4259 | CDC10        | -1.0 | -1.0 | -1.0 | -1.1 | cell division control protein                                                          | YCR002c          | orf19.548   |
| CA3388 | IPF6755      | -1.0 | 1.0  | -1.0 | -1.1 | unknown function                                                                       |                  | orf19.320   |
| CA2869 | RPC82        | -1.0 | -1.1 | -1.2 | -1.1 | DNA-directed RNA polymerase III, 82 KD subunit (by hc                                  | YPR190c          | orf19.2847  |
| CA1644 | IPF9345      | -1.0 | -1.0 | -1.1 | -1.1 | unknown function                                                                       |                  | orf19.1728  |
| CA0440 | IPF12473     | -1.2 | -1.2 | -1.5 | -1.1 | unknown function                                                                       | YML033w          | orf19.5571  |
| CA3151 | IPF4033      | -1.0 | -1.1 | -1.1 | -1.1 | similar to <i>Saccharomyces cerevisiae</i> Ayr1p 1-acyldihydri                         | YIL124w          | orf19.6167  |
| CA5548 | IPF5978      | -1.0 | -1.0 | 1.0  | -1.1 | unknown function                                                                       |                  | orf19.7311  |
| CA5479 | IPF8205      | 1.0  | 1.0  | 1.1  | -1.1 | unknown function                                                                       |                  | orf19.5311  |
| CA4709 | IPF5895      | 1.0  | 1.0  | 1.0  | -1.1 | unknown function                                                                       | YOR245c          | orf19.6941  |
| CA0395 | SEF11.5EOC   | -1.2 | -1.2 | -1.2 | -1.1 | Putative transcription factor, 5-prime end (by homology)                               |                  | orf19.1926  |

|        |              |      |      |      |      |                                                               |                            |             |
|--------|--------------|------|------|------|------|---------------------------------------------------------------|----------------------------|-------------|
| CA3295 | PF5723.EXON  | 1.0  | -1.2 | -1.1 | -1.1 | cell surface GPI-anchored protein, exon 1 (by homology)       |                            | orf19.6329  |
| CA5729 | UBA1         | -1.2 | 1.0  | -1.2 | -1.1 | Ubiquitin-activating enzyme (by homology)                     | YKL210w                    | orf19.7438  |
| CA4157 | HYU1         | -1.3 | 1.2  | -1.1 | -1.1 | hydantoin utilization protein A (hyuA) homolog                | YKL215c                    | orf19.5804  |
| CA3356 | IPF9560      | -1.1 | -1.1 | -1.2 | -1.1 | unknown function                                              |                            | orf19.9497  |
| CA3271 | GLY2         | -1.0 | -1.1 | -1.1 | -1.1 | L-threonine aldolase, low-specific                            | YEL046c                    | orf19.6305  |
| CA0985 | IPF4815      | 1.0  | 1.0  | -1.0 | -1.1 | unknown Function                                              |                            | orf19.3351  |
| CA4795 | IPF3378      | -1.1 | -1.1 | -1.0 | -1.1 | similar to <i>Saccharomyces cerevisiae</i> Pri1p DNA-directe  | YIR008c                    | orf19.4030  |
| CA0176 | IPF11388     | -1.1 | -1.0 | -1.1 | -1.1 | unknown function                                              | YER041w                    | orf19.8267  |
| CA4001 | RPL12        | -1.0 | -1.0 | -1.0 | -1.1 | ribosomal protein                                             | YEL054c                    | orf19.1635  |
| CA6165 | SNF5.3F      | -1.1 | 1.1  | -1.0 | -1.1 | Component of SWI/SNF transcription activator complex          | YBR289w                    | orf19.5871  |
| CA2340 | MNN5         | -1.1 | -1.0 | -1.0 | -1.1 | Golgi alpha-1,2-mannosyltransferase (by homology)             |                            | orf19.2347  |
| CA0990 | IPF11068     | -1.3 | -1.1 | -1.1 | -1.1 | unknown function                                              | YIL005w                    | orf19.1392  |
| CA2157 | IPF8537      | -1.1 | -1.1 | -1.1 | -1.1 | similar to <i>Saccharomyces cerevisiae</i> Cne1p calnexin, in | YAL058w                    | orf19.5300  |
| CA2907 | IPF15525     | 1.0  | -1.0 | -1.1 | -1.1 | putative gluconokinase (by homology)                          | YDR248c                    | orf19.4520  |
| CA5594 | IPF19814     | 1.1  | -1.0 | -1.1 | -1.1 | folate hydrolase (by homology)                                | YJR126c                    | orf19.7106  |
| CA1899 | HDA1         | -1.1 | -1.0 | -1.2 | -1.1 | Histone deacetylase (by homology)                             | YNL021w                    | orf19.2606  |
| CA5584 | SAC7         | 1.2  | -1.1 | -1.2 | -1.1 | GAP for RHO1 by homology                                      | YDR389w                    | orf19.7115  |
| CA3574 | IPF19584     | 1.1  | -1.0 | -1.1 | -1.1 | unknown function                                              | YFR013w ; Missing in array | orf19.2266  |
| CA2354 | IPF18480     | 1.0  | 1.0  | -1.0 | -1.1 | unknown function                                              |                            | orf19.11893 |
| CA1854 | IPF12611     | -1.0 | 1.0  | 1.0  | -1.1 | unknown function                                              | YGL228w                    | orf19.649   |
| CA0636 | FDH4.3F      | -1.0 | -1.1 | -1.2 | -1.1 | Formate dehydrogenase, 3-prime end (by homology)              |                            |             |
| CA3790 | IPF11215     | -1.1 | -1.0 | -1.1 | -1.1 | unknown function                                              | YKL074c                    | orf19.13250 |
| CA4547 | SRB9         | -1.0 | 1.0  | 1.0  | -1.1 | DNA-directed RNA polymerase II holoenzyme and Srb1            | YDR443c                    | orf19.1451  |
| CA1617 | IPF14536     | 1.0  | -1.0 | -1.0 | -1.1 | unknown function                                              | YDR339c                    | orf19.3220  |
| CA3261 | TYS1         | 1.0  | -1.0 | 1.0  | -1.1 | tyrosyl-tRNA synthetase by homology                           | YGR185c                    | orf19.2694  |
| CA4062 | IPF5933      | 1.1  | -1.1 | -1.1 | -1.1 | similar to <i>Saccharomyces cerevisiae</i> Mhr1p involved in  | YDR296w                    | orf19.439   |
| CA0626 | IPF3161      | 1.1  | -1.1 | -1.2 | -1.1 | Unknown function                                              | YNR054c                    | orf19.3161  |
| CA3674 | PF19529.EXON | 1.1  | -1.0 | 1.0  | -1.1 | unknown function, exon 1                                      |                            | orf19.6454  |
| CA0324 | STT4         | -1.0 | -1.1 | -1.0 | -1.1 | Phosphatidylinositol-4-kinase (by homology)                   | YLR305c                    | orf19.9377  |
| CA5174 | PRS4         | 1.2  | 1.1  | 1.1  | -1.1 | Ribose-phosphate pyrophosphokinase 3 (by homology)            | YER099c                    | orf19.4611  |
| CA3409 | IPF9410      | -1.0 | -1.0 | -1.1 | -1.1 | similar to <i>Saccharomyces cerevisiae</i> Nuf1p spindle pole | YDR356w                    | orf19.6148  |
| CA2237 | IPF10032.3F  | 1.0  | -1.0 | 1.0  | -1.1 | unknown function, 3-prime end                                 |                            | orf19.3917  |
| CA3515 | MRPL15       | -1.0 | -1.1 | -1.1 | -1.1 | mitochondrial ribosomal protein of the large subunit (by      | YLR312wa                   | orf19.6363  |
| CA2637 | IPF19954     | -1.0 | -1.0 | 1.0  | -1.1 | unknown function                                              |                            | orf19.4301  |
| CA1468 | SRB10        | -1.0 | 1.0  | 1.0  | -1.1 | cyclin-dependent kinase by homology                           | YPL042c                    | orf19.794   |
| CA3764 | IPF13072     | 1.0  | -1.0 | -1.0 | -1.1 | unknown function                                              |                            | orf19.2905  |
| CA4493 | IPF4055      | -1.1 | -1.0 | 1.0  | -1.1 | unknown function                                              |                            | orf19.1867  |
| CA3454 | PF10533.EXON | 1.0  | -1.2 | -1.1 | -1.1 | unknown function, exon 1                                      |                            | orf19.1255  |
| CA1665 | RIB1         | 1.2  | -1.0 | 1.0  | -1.1 | GTP cyclohydrolase II by homology to <i>S.cerevisiae</i>      | YBL033c                    | orf19.2862  |
| CA3064 | IPF2973      | -1.0 | -1.1 | -1.1 | -1.1 | unknown function                                              |                            | orf19.4283  |
| CA0234 | IFA3         | -1.1 | -1.1 | -1.1 | -1.1 | unknown function                                              | YKR060w                    | orf19.7793  |
| CA4868 | IPF4078      | 1.0  | -1.0 | -1.0 | -1.1 | Unknown Function                                              |                            | orf19.3845  |
| CA5330 | IPF2130      | 1.1  | 1.0  | -1.0 | -1.1 | similar to 2-nitropropane dioxygenases                        | YJR149w                    | orf19.7204  |
| CA5420 | IPF1583      | 1.0  | -1.0 | 1.0  | -1.1 | unknown function                                              | YLR412w                    | orf19.970   |
| CA3838 | LAS17        | 1.1  | 1.1  | 1.1  | -1.1 | actin assembly factor (by homology)                           | YOR181w                    | orf19.6598  |
| CA4146 | LEU3         | 1.0  | 1.0  | -1.1 | -1.1 | Binds to UASs in promoters of LEU1, LEU2, LEU4, ILV2          | YLR451w                    | orf19.11700 |
| CA2525 | IPF4324.3    | -1.0 | -1.0 | -1.0 | -1.1 | unknown function, 3-prime end                                 |                            | orf19.5522  |
| CA3057 | IPF2954      | -1.0 | -1.1 | -1.0 | -1.1 | unknown function                                              | YDR267c                    | orf19.4293  |
| CA5774 | IPF1113      | 1.0  | 1.0  | 1.1  | -1.1 | unknown function                                              | YIL039w                    | orf19.5418  |

|        |              |      |      |      |      |                                                                            |                            |             |
|--------|--------------|------|------|------|------|----------------------------------------------------------------------------|----------------------------|-------------|
| CA0077 | IPF1239      | -1.1 | -1.1 | -1.1 | -1.1 | unknown function                                                           |                            |             |
| CA2219 | CAT8         | 1.0  | -1.0 | -1.1 | -1.1 | transcription factor involved in                                           | gluconeogenesis YMR280c    | orf19.12563 |
| CA2926 | UBA3         | 1.1  | -1.0 | 1.0  | -1.1 | Ubiquitin-like protein activating enzyme                                   | YPR066w                    | orf19.4209  |
| CA4699 | IPF4220      | 1.1  | -1.0 | 1.0  | -1.1 | similar to <i>Saccharomyces cerevisiae</i> Pep8p involved in               | YJL053w                    | orf19.6927  |
| CA1332 | IPF11716     | 1.0  | -1.1 | -1.1 | -1.1 | unknown function                                                           |                            | orf19.1150  |
| CA3056 | IPF2953      | -1.1 | -1.1 | -1.1 | -1.1 | similar to <i>Saccharomyces cerevisiae</i> Cyc2p cytochrome                | YOR037w                    | orf19.4294  |
| CA5820 | IPF2500      | -1.1 | -1.1 | -1.1 | -1.1 | unknown function                                                           |                            | orf19.7473  |
| CA0826 | IPF19885     | 1.0  | -1.0 | 1.0  | -1.1 | unknown function                                                           |                            | orf19.8308  |
| CA3718 | POP7         | -1.1 | -1.1 | 1.0  | -1.1 | Nuclear RNase P subunit (by homology)                                      | YBR167c                    | orf19.11644 |
| CA1427 | IPF9914      | -1.0 | 1.0  | -1.1 | -1.1 | alanyl-tRNA synthetase (by homology)                                       | YOR335c                    | orf19.5746  |
| CA0585 | ADE5,7       | 1.0  | -1.0 | -1.0 | -1.1 | phosphoribosylamine-glycine ligase and phosphoribosyl                      | YGL234w                    | orf19.12528 |
| CA5431 | IPF195       | 1.1  | 1.1  | 1.0  | -1.1 | unknown function                                                           | YHL002w                    | orf19.3233  |
| CA1390 | IPF17474     | -1.0 | 1.1  | 1.1  | -1.1 | unknown function                                                           |                            | orf19.1768  |
| CA1583 | ROT1         | -1.1 | -1.1 | 1.0  | -1.1 | Suppressor of TOR2 mutations (by homology)                                 | YMR200w                    | orf19.6029  |
| CA1272 | CGR1         | -1.1 | -1.1 | -1.1 | -1.1 | Cell growth protein (by homology)                                          | YBR053c ; Missing in array | orf19.2722  |
| CA5161 | IPF983       | -1.0 | -1.2 | -1.2 | -1.1 | unknown function                                                           | YPL107w                    | orf19.4600  |
| CA5526 | IPF2857      | -1.1 | -1.1 | -1.2 | -1.1 | unknown function                                                           |                            | orf19.7284  |
| CA5279 | SYS1         | 1.1  | 1.0  | 1.1  | -1.1 | Similar to ypt6 suppressor in <i>S. cerevisiae</i> (by homology)           | YJL004c                    | orf19.7128  |
| CA5926 | PRO2         | -1.1 | -1.1 | -1.1 | -1.1 | Proline biosynthetic enzyme (by homology)                                  | YOR323c                    | orf19.6779  |
| CA4334 | IPF2082      | -1.0 | -1.0 | -1.1 | -1.1 | unknown function                                                           |                            | orf19.4085  |
| CA1113 | IPF9996      | 1.0  | 1.1  | 1.1  | -1.1 | unknown function                                                           |                            | orf19.2285  |
| CA1268 | IPF14693     | -1.1 | -1.0 | -1.3 | -1.1 | unknown function                                                           | YBL004w                    | orf19.3159  |
| CA2672 | EFH1         | 1.1  | -1.0 | -1.1 | -1.1 | Transcription regulator                                                    |                            | orf19.5498  |
| CA1273 | CCT4         | 1.0  | -1.1 | -1.2 | -1.1 | Component of chaperonin-containing T-complex                               | YDL143w                    | orf19.2720  |
| CA3464 | DBP5         | -1.2 | -1.2 | -1.2 | -1.1 | RNA helicase (by homology)                                                 | YOR046c                    | orf19.1661  |
| CA4635 | IPF1524      | -1.0 | -1.2 | -1.1 | -1.1 | putative multidrug resistance protein (by homology)                        |                            | orf19.341   |
| CA4844 | PDR13        | -1.3 | 1.1  | -1.0 | -1.1 | Drug resistance                                                            | YHR064c                    | orf19.3812  |
| CA5607 | STL2.5F      | 1.0  | -1.1 | -1.0 | -1.1 | sugar transporter, 5-prime end (by homology)                               |                            | orf19.7093  |
| CA0384 | PCL1         | 1.0  | -1.1 | -1.1 | -1.1 | cyclin, G1/S-specific (by homology)                                        | YNL289w                    | orf19.10172 |
| CA3074 | IPF6106      | -1.0 | -1.1 | 1.1  | -1.1 | similar to <i>Bacillus halodurans</i> holo-(acyl carrier protein) synthase |                            | orf19.4812  |
| CA5726 | AAF1         | 1.0  | 1.1  | 1.0  | -1.1 | Adhesion and aggregation mediating surface antigen                         |                            | orf19.7436  |
| CA4014 | CTK1         | -1.1 | -1.1 | -1.1 | -1.1 | probable cell division protein kinase                                      | YKL139w                    | orf19.1619  |
| CA0765 | IPF9040.3EOC | 1.1  | -1.1 | -1.1 | -1.1 | similar to <i>Saccharomyces cerevisiae</i> Fhl1p transcription             | YPR104c                    | orf19.9778  |
| CA4856 | IPF15950     | 1.1  | -1.1 | 1.0  | -1.1 | unknown function                                                           | YKR087c                    | orf19.3827  |
| CA2467 | IPF8724      | 1.0  | -1.0 | -1.0 | -1.1 | unknown function                                                           | YPL113c                    | orf19.1796  |
| CA1088 | IPF13319     | 1.0  | -1.0 | 1.1  | -1.1 | unknown function                                                           |                            | orf19.740   |
| CA5148 | TFG1         | -1.1 | -1.0 | -1.0 | -1.1 | RNA pol.II transcription initiation factor TFIIF (by homol                 | YGR186w                    | orf19.4585  |
| CA1994 | IPF6613      | -1.2 | -1.1 | -1.1 | -1.1 | unknown function                                                           | YDR349c                    | orf19.6481  |
| CA2647 | IPF13088     | -1.0 | -1.0 | -1.1 | -1.1 | unknown function                                                           |                            | orf19.1186  |
| CA4417 | LIP5         | 1.0  | 1.0  | 1.1  | -1.1 | Secretory lipase                                                           |                            | orf19.5179  |
| CA5517 | IPF721.3F    | 1.1  | -1.0 | -1.1 | -1.1 | unknown function, 3-prime end                                              |                            | orf19.5365  |
| CA0026 | IPF16843     | -1.1 | -1.1 | 1.1  | -1.1 | unknown function                                                           | YGR127w                    |             |
| CA3118 | COQ4         | -1.2 | -1.2 | -1.1 | -1.1 | ubiquinone biosynthesis                                                    | YDR204w                    | orf19.3008  |
| CA3708 | HIP1         | 1.2  | -1.2 | -1.0 | -1.1 | Histidine permease (by homology)                                           |                            | orf19.4940  |
| CA4073 | IPF2559.3    | 1.0  | 1.0  | -1.1 | -1.1 | unknown function, 3-prime end                                              |                            | orf19.6626  |
| CA3921 | OLE1         | -1.2 | -1.3 | -1.1 | -1.1 | Stearoyl-CoA desaturase (by homology)                                      | YGL055w                    | orf19.5117  |
| CA0865 | IFM2         | -1.1 | -1.1 | -1.2 | -1.1 | Glycerate-formate-dehydrogenases (by homology)                             |                            | orf19.3584  |
| CA0448 | ALS10        | 1.1  | 1.0  | 1.2  | -1.1 | agglutinin like protein                                                    |                            | orf19.2355  |
| CA0678 | IPF13094     | -1.2 | -1.2 | 1.0  | -1.1 | unknown function                                                           | YNL115c                    | orf19.8774  |



|        |              |      |      |      |      |                                                              |                            |             |
|--------|--------------|------|------|------|------|--------------------------------------------------------------|----------------------------|-------------|
| CA6032 | IPF596       | -1.1 | 1.0  | 1.0  | -1.1 | similar to <i>Saccharomyces cerevisiae</i> Vps3p vacuolar so | YDR495c                    | orf19.7642  |
| CA5061 | IPF8495      | 1.2  | -1.1 | -1.1 | -1.1 | unknown function                                             |                            | orf19.3030  |
| CA0733 | NIP1         | -1.1 | -1.1 | -1.2 | -1.1 | translation initiation factor subunit                        | YMR309c                    | orf19.4635  |
| CA2482 | IPF9841      | -1.1 | -1.1 | -1.1 | -1.1 | unknown function                                             |                            | orf19.3204  |
| CA4961 | IPF3916      | -1.1 | -1.1 | -1.2 | -1.1 | similar to <i>Saccharomyces cerevisiae</i> Exo70p 70 kDa ex  | YJL085w                    | orf19.6512  |
| CA1708 | IPF7543      | -1.0 | -1.1 | -1.2 | -1.1 | unknown function                                             |                            | orf19.4888  |
| CA3660 | IPF17794     | 1.1  | 1.1  | -1.0 | -1.1 | unknown function                                             |                            |             |
| CA4582 | MDM12        | -1.1 | -1.0 | -1.1 | -1.1 | Involved in mitochondrial inheritance (by homology)          | YOL009c                    | orf19.6900  |
| CA5483 | IPF817       | 1.1  | 1.0  | -1.1 | -1.1 | unknown function                                             |                            | orf19.5316  |
| CA5450 | IPF243       | -1.1 | -1.1 | -1.2 | -1.1 | unknown function                                             |                            | orf19.3254  |
| CA2703 | IPF12193     | -1.0 | 1.0  | 1.0  | -1.1 | unknown function                                             | Missing in array           | orf19.4655  |
| CA3926 | IPF16198     | 1.0  | -1.0 | -1.1 | -1.1 | possible regulatory protein                                  | YPR072w                    | orf19.5107  |
| CA4400 | IPF14362     | -1.1 | -1.0 | -1.1 | -1.1 | unknown function                                             |                            | orf19.3110  |
| CA5696 | IPF3309.3EOC | 1.0  | 1.1  | -1.0 | -1.1 | unknown function, 3-prime end                                |                            | orf19.7398  |
| CA4132 | STE20        | 1.1  | 1.0  | 1.1  | -1.1 | serine/threonine-specific protein kinase                     | YHL007c                    | orf19.4242  |
| CA5878 | PRP5         | -1.1 | -1.1 | -1.2 | -1.1 | pre-mRNA processing RNA-helicase (by homology)               | YBR237w                    | orf19.6831  |
| CA1714 | NAB2         | -1.2 | -1.1 | -1.2 | -1.1 | Nuclear poly(A)-RNA-binding protein (by homology)            | YGL122c                    | orf19.3333  |
| CA3547 | ADE13        | 1.1  | -1.2 | -1.1 | -1.1 | adenylosuccinate lyase (by homology)                         | YLR359w ; Missing in array | orf19.3870  |
| CA5684 | IPF3331      | 1.2  | 1.1  | 1.1  | -1.1 | unknown function                                             | YBR185c                    | orf19.7386  |
| CA4387 | MAP1         | 1.1  | -1.0 | -1.0 | -1.1 | methionine aminopeptidase, isoform 1 (by homology)           | YLR244c                    | orf19.3124  |
| CA6075 | THI4         | -1.0 | 1.0  | 1.0  | -1.1 | Thiazole biosynthetic enzyme precursor (by homology)         | YGR144w                    | orf19.5986  |
| CA3219 | IPF10003     | -1.1 | 1.0  | -1.3 | -1.1 | similar to <i>Saccharomyces cerevisiae</i> Rnh70p ribonucle  | YGR276c                    | orf19.6195  |
| CA4836 | IPF1222      | -1.1 | -1.1 | -1.1 | -1.1 | Similar to superoxide dismutase (by homology)                |                            | orf19.2060  |
| CA3104 | IPF12084     | 1.0  | 1.0  | 1.0  | -1.1 | unknown function                                             | YOR220w                    | orf19.13907 |
| CA2839 | IPF8336      | -1.1 | -1.0 | -1.2 | -1.1 | unknown function                                             |                            | orf19.4792  |
| CA0508 | IPF11991     | -1.1 | -1.1 | -1.4 | -1.1 | similar to <i>Saccharomyces cerevisiae</i> Msu1p 3-5 exonu   | YMR287c                    | orf19.11107 |
| CA3904 | IPF14888     | -1.1 | -1.1 | -1.1 | -1.1 | unknown function                                             | YNL119w                    | orf19.11877 |
| CA3263 | UBR12        | -1.2 | 1.0  | -1.1 | -1.1 | ubiquitin-protein ligase by homology                         | YLR024c                    | orf19.2697  |
| CA3795 | IPF5699      | 1.1  | -1.1 | -1.0 | -1.1 | Abhydrolase by homology                                      |                            | orf19.5824  |
| CA3215 | HCS1         | -1.1 | -1.1 | -1.2 | -1.1 | putative DNA helicase A (by homology)                        | YKL017c                    | orf19.6199  |
| CA3681 | IPF19787     | -1.1 | 1.0  | -1.0 | -1.1 | unknown function                                             | YER093c                    | orf19.728   |
| CA4161 | IPF20164     | 1.0  | -1.2 | 1.1  | -1.1 | putative kynurenine aminotransferase (by homology)           | YJL060w                    | orf19.5809  |
| CA2742 | JAC1         | -1.0 | 1.1  | 1.0  | -1.1 | molecular chaperone (by homology)                            | YGL018c                    | orf19.2104  |
| CA5218 | WHI2         | -1.1 | -1.1 | -1.1 | -1.1 | Growth regulation factor (by homology)                       | YOR043w                    | orf19.7036  |
| CA1221 | IPF14872     | 1.0  | -1.1 | -1.2 | -1.1 | unknown function                                             | YDR527w                    | orf19.4133  |
| CA1749 | IPF8257.3F   | 1.0  | 1.1  | -1.1 | -1.1 | unknown function, 3-prime end                                |                            |             |
| CA1989 | IPF16596     | 1.0  | 1.1  | 1.1  | -1.1 | unknown function                                             |                            | orf19.95    |
| CA0999 | IPF12368     | -1.1 | -1.0 | -1.0 | -1.1 | unknown function                                             |                            | orf19.11847 |
| CA6021 | BFR2         | 1.0  | -1.1 | -1.1 | -1.1 | involved in protein transport steps at the Brefeldin A blo   | YDR299w                    | orf19.7624  |
| CA0136 | IFH1         | -1.0 | -1.0 | -1.0 | -1.1 | Dioxygenase (by homology)                                    |                            | orf19.9207  |
| CA3509 | PRP6         | -1.1 | -1.1 | -1.1 | -1.1 | snRNP(U4/U6)-associated splicing factor (by homology)        | YBR055c                    | orf19.6356  |
| CA4785 | IPF3361      | 1.2  | -1.1 | -1.1 | -1.1 | putative mitochondrial ribosomal protein S7 (by homolo       | YJR113c                    | orf19.4018  |
| CA2632 | NAR1         | 1.1  | -1.0 | -1.0 | -1.1 | Yeast nuclear architecture related protein (by homology      | YNL240c                    | orf19.4757  |
| CA2754 | VPS45        | -1.0 | 1.1  | 1.0  | -1.1 | vacuolar protein sorting-associated protein (by homolog      | YGL095c                    | orf19.13063 |
| CA4508 | NAM9         | -1.1 | -1.1 | -1.2 | -1.1 | mitochondrial ribosomal protein                              | YNL137c                    | orf19.498   |
| CA3847 | IPF7942      | -1.0 | -1.1 | -1.0 | -1.1 | NADH-ubiquinone oxidoreductase                               |                            | orf19.6607  |
| CA4097 | GIN4         | -1.1 | -1.1 | -1.0 | -1.1 | ser/thr protein kinase (by homology)                         | YDR507c                    | orf19.663   |
| CA0759 | IPF11167     | -1.1 | -1.1 | -1.2 | -1.1 | unknown function                                             | YKR003w                    | orf19.3198  |
| CA3361 | SNF1         | -1.1 | -1.1 | -1.1 | -1.1 | serine/threonine protein kinase                              | YDR477w                    | orf19.9491  |

|        |              |      |      |      |      |                                                                                      |                            |             |
|--------|--------------|------|------|------|------|--------------------------------------------------------------------------------------|----------------------------|-------------|
| CA3974 | IPF6507      | 1.0  | -1.1 | -1.1 | -1.1 | unknown function                                                                     | YMR157c ; Missing in array | orf19.1546  |
| CA5363 | NCR1         | -1.1 | -1.1 | -1.1 | -1.1 | Polytopic membrane protein involved in sterol homeost                                | YPL006w                    | orf19.7242  |
| CA4481 | IPF9150      | -1.1 | -1.1 | -1.2 | -1.1 | similar to <i>Saccharomyces cerevisiae</i> Mpt1p required for                        | YMR005w                    | orf19.9441  |
| CA2212 | IPF13919     | -1.0 | -1.1 | -1.1 | -1.1 | unknown function                                                                     |                            | orf19.4750  |
| CA1289 | ZUO1         | -1.0 | 1.0  | -1.0 | -1.1 | Zuotin, a putative Z-DNA binding (by homology)                                       | YGR285c                    | orf19.10224 |
| CA5827 | IPF2485      | -1.0 | -1.1 | -1.1 | -1.1 | unknown function                                                                     |                            | orf19.7482  |
| CA0198 | IPF19685     | -1.4 | -1.5 | -1.2 | -1.1 | unknown function                                                                     | YHR097c                    | orf19.9227  |
| CA6147 | IPF1862.5F   | -1.1 | -1.0 | -1.1 | -1.1 | unknown function, 5-prime end                                                        |                            | orf19.5895  |
| CA1856 | IPF13689     | -1.0 | -1.1 | -1.0 | -1.1 | unknown function                                                                     |                            | orf19.9081  |
| CA1043 | TOM6         | 1.0  | -1.1 | 1.1  | -1.1 | mitochondrial outer membrane import receptor subunit (YOR045w                        |                            | orf19.9219  |
| CA3004 | KIN28        | 1.0  | 1.1  | 1.0  | -1.1 | cyclin-dependent ser/thr protein kinase (by homology)                                | YDL108w                    | orf19.13619 |
| CA4735 | IPF7726      | -1.2 | 1.1  | 1.0  | -1.1 | unknown function                                                                     | YPL260w                    | orf19.4850  |
| CA2159 | IPF19753     | -1.1 | -1.0 | -1.1 | -1.1 | similar to <i>Saccharomyces cerevisiae</i> Tfb1p transcription                       | YDR311w                    | orf19.5297  |
| CA5969 | BET2         | 1.0  | 1.0  | -1.0 | -1.1 | beta subunit of geranylgeranyl transferase type2                                     | YPR176c                    | orf19.7563  |
| CA4683 | HSP78.3F     | 1.1  | 1.0  | -1.0 | -1.1 | heat shock protein of clpb family of ATP-dependent proteases, mitochondrial, 3-prime |                            | orf19.884   |
| CA2555 | IPF12105     | -1.0 | 1.1  | -1.0 | -1.1 | unknown function                                                                     |                            | orf19.5633  |
| CA3618 | THO1         | -1.1 | -1.0 | -1.1 | -1.1 | suppressor of the hpr1 ts phenotype (by homology)                                    | YER063w                    | orf19.200   |
| CA2459 | PF12234.5EOC | -1.1 | 1.0  | -1.1 | -1.1 | unknown function, 5-prime end                                                        |                            | orf19.3509  |
| CA3807 | IPF9225      | -1.1 | 1.0  | 1.0  | -1.1 | unknown function                                                                     | YDR020c                    | orf19.2487  |
| CA1754 | IPF16320     | -1.3 | -1.1 | -1.2 | -1.1 | Unknown function                                                                     | YCL039w                    | orf19.5131  |
| CA2197 | IPF8110      | -1.1 | -1.1 | -1.3 | -1.1 | unknown function                                                                     |                            | orf19.2936  |
| CA4721 | CPP1         | -1.1 | -1.0 | -1.1 | -1.1 | probable protein-tyrosine phosphatase                                                | YNL053w                    | orf19.12330 |
| CA3359 | IPF9566      | -1.0 | -1.1 | 1.1  | -1.1 | unknown function                                                                     | YDR374c                    | orf19.1939  |
| CA3010 | IPF14568     | 1.1  | -1.1 | -1.0 | -1.1 | unknown function                                                                     | YGL246c                    | orf19.13610 |
| CA0054 | RIB4.3       | 1.2  | -1.0 | -1.0 | -1.1 | 6,7-dimethyl-8-ribityllumazine synthase, 3-prime end (b                              | YOL143c                    |             |
| CA6025 | IPF614       | -1.0 | -1.1 | -1.0 | -1.1 | unknown function                                                                     | YOL138c                    | orf19.7629  |
| CA2679 | IFU5         | 1.1  | 1.0  | 1.1  | -1.1 | Unknown function                                                                     | YFL010c                    | orf19.2568  |
| CA3369 | IPF4672      | -1.0 | -1.0 | -1.0 | -1.1 | unknown Function                                                                     | YNL032w                    | orf19.1850  |
| CA0481 | STE14        | -1.0 | 1.0  | -1.0 | -1.1 | farnesyl cystein carboxyl-methyltransferase (by hc                                   | YDR410c                    | orf19.7766  |
| CA5147 | PHO12        | -1.0 | -1.0 | -1.0 | -1.1 | Acid phosphatase, secreted (by homology)                                             |                            | orf19.4584  |
| CA4797 | PRP22        | -1.0 | -1.0 | -1.1 | -1.1 | RNA-dependent ATPase (by homology)                                                   | YER013w                    | orf19.4033  |
| CA5329 | MRP7         | -1.1 | -1.2 | -1.1 | -1.1 | Mitochondrial ribosomal protein Yml2 precursor (by hor                               | YNL005c                    | orf19.7203  |
| CA4811 | ECM16        | -1.0 | -1.1 | -1.1 | -1.1 | RNA helicase (by homology)                                                           | YMR128w                    | orf19.2090  |
| CA3448 | YKT6         | -1.1 | -1.1 | -1.1 | -1.1 | Endoplasmic Reticulum-Golgi transport (by homology)                                  | YKL196c                    | orf19.2974  |
| CA4284 | DPH52.3EOC   | -1.1 | -1.0 | 1.0  | -1.1 | Diphthamide methyltransferase, 3-prime end (by homology)                             |                            | orf19.6682  |
| CA5348 | IPF863       | -1.1 | -1.1 | -1.1 | -1.1 | involved in inositol biosynthesis (by homology)                                      | YBR030w                    | orf19.7223  |
| CA5188 | TAP42        | -1.0 | -1.0 | 1.1  | -1.1 | Component of the Tor signaling pathway (by homology)                                 | YMR028w                    | orf19.4626  |
| CA3632 | DFR1         | 1.0  | 1.0  | 1.0  | -1.1 | dihydrofolate reductase                                                              | YOR236w                    | orf19.5142  |
| CA1971 | PKH2         | 1.0  | 1.0  | -1.0 | -1.1 | Ser/Thr protein kinase(by homology)                                                  | YOL100w                    | orf19.5224  |
| CA5168 | IPF6032      | 1.0  | 1.0  | 1.1  | -1.1 | unknown function                                                                     | Missing in array           | orf19.4607  |
| CA2779 | IPF3836      | 1.1  | -1.1 | -1.2 | -1.1 | unknown function                                                                     | YDL219w                    | orf19.279   |
| CA5981 | MSS51        | -1.1 | -1.1 | -1.1 | -1.1 | involved in maturation of COX1 and COB mRNA (by ho                                   | YLR203c                    | orf19.7577  |
| CA0833 | IPF12501     | -1.1 | -1.1 | -1.0 | -1.1 | unknown function                                                                     | YDL183c                    | orf19.9245  |
|        | NAD2         | 1.1  | -1.0 | -1.1 | -1.1 |                                                                                      |                            |             |
| CA1820 | IPF9529      | 1.1  | 1.1  | -1.0 | -1.1 | probable mannosyltransferase (by homology)                                           |                            | orf19.4270  |
| CA1544 | IPF1040      | 1.1  | -1.0 | -1.1 | -1.1 | Similar to transcriptional activators                                                |                            | orf19.4568  |
| CA1479 | IPF16428     | 1.1  | -1.1 | -1.2 | -1.1 | unknown function                                                                     | YIL019w                    | orf19.1250  |
| CA0002 | DOC1         | -1.0 | -1.1 | -1.0 | -1.1 | component of the anaphase promoting complex (by hon                                  | YGL240w                    | orf19.12523 |
| CA4979 | IPF2062      | 1.0  | -1.2 | -1.1 | -1.1 | unknown function                                                                     |                            | orf19.5271  |

|        |             |      |      |      |      |                                                                                               |         |             |
|--------|-------------|------|------|------|------|-----------------------------------------------------------------------------------------------|---------|-------------|
| CA4226 | IPF8752     | -1.1 | -1.2 | -1.3 | -1.1 | similar to <i>Saccharomyces cerevisiae</i> Mrpl24p ribosomal                                  | YMR193w | orf19.828   |
| CA1262 | MDR1        | -1.0 | -1.1 | -1.0 | -1.1 | Mac1p interacting protein (by homology)                                                       | YGR100w | orf19.1244  |
| CA4083 | IPF5018     | -1.1 | -1.1 | -1.0 | -1.1 | unknown function                                                                              |         | orf19.6639  |
| CA3846 | IPF7943     | 1.0  | 1.0  | 1.0  | -1.1 | unknown function                                                                              |         | orf19.6606  |
| CA0029 | PET56       | -1.0 | 1.0  | -1.1 | -1.1 | ribosomal RNA methylase (by homology)                                                         | YOR201c | orf19.182   |
| CA3820 | PBP2        | -1.1 | -1.1 | -1.1 | -1.1 | PAB1 binding protein (by homology)                                                            | YBR233w | orf19.5771  |
| CA1493 | FTH2        | -1.1 | -1.2 | -1.1 | -1.1 | iron transporter (by homology)                                                                |         | orf19.3227  |
| CA5779 | IPF1121     | -1.1 | -1.1 | -1.1 | -1.1 | unknown function                                                                              | YKR079c | orf19.5425  |
| CA3400 | JNM1        | -1.0 | -1.1 | -1.0 | -1.1 | mitosis protein, involved in nuclear migration (by homology)                                  | YMR294w | orf19.3976  |
| CA0460 | SEC17       | -1.0 | -1.0 | 1.0  | -1.1 | transport vesicle fusion protein (by homology)                                                | YBL050w | orf19.2518  |
| CA6059 | CTA26       | -1.0 | -1.0 | -1.2 | -1.1 | transcriptional activation                                                                    |         | orf19.7680  |
| CA3584 | IPF15468    | 1.0  | -1.0 | -1.1 | -1.1 | unknown function                                                                              | YCR051w | orf19.2256  |
| CA0782 | IPF16253    | -1.0 | -1.1 | -1.0 | -1.1 | unknown function                                                                              |         | orf19.11414 |
| CA4980 | IPF2059     | -1.1 | -1.2 | -1.1 | -1.1 | unknown function                                                                              |         | orf19.5270  |
| CA1218 | CDC20       | -1.0 | 1.1  | -1.2 | -1.1 | anaphase promoting complex subunit (by homology)                                              | YGL116w | orf19.7769  |
| CA2574 | ATH1        | -1.0 | -1.1 | -1.2 | -1.1 | acid trehalase, vacuolar                                                                      | YPR026w | orf19.6214  |
| CA1280 | IPF10828    | 1.0  | -1.0 | -1.0 | -1.1 | unknown function                                                                              |         | orf19.3627  |
| CA1821 | IPF9527     | -1.1 | -1.1 | -1.1 | -1.1 | unknown function                                                                              |         | orf19.4269  |
| CA3633 | IFA19       | -1.1 | 1.0  | 1.0  | -1.1 | unknown function                                                                              |         | orf19.5141  |
| CA3153 | FRP2        | 1.1  | -1.1 | -1.1 | -1.1 | member of the FRP family of proteins related to <i>Yarrowia lipolytica</i> glyoxylate pathway |         | orf19.6169  |
| CA2921 | IPF17037    | 1.1  | 1.1  | 1.0  | -1.1 | unknown function                                                                              |         | orf19.4214  |
| CA4771 | IPF3336     | -1.2 | -1.0 | -1.2 | -1.1 | unknown function                                                                              | YGL145w | orf19.4003  |
| CA3192 | IPF11598    | -1.0 | -1.1 | 1.0  | -1.1 | by homology to <i>S. cerv.</i> :hexokinase I                                                  |         | orf19.2154  |
| CA2137 | ARP9        | -1.1 | -1.1 | -1.1 | -1.1 | actin-related protein (by homology)                                                           | YMR033w | orf19.2507  |
| CA3964 | IPF9370     | 1.0  | -1.1 | -1.1 | -1.1 | unknown function                                                                              | YMR155w | orf19.1424  |
| CA2228 | SCT12       | -1.2 | -1.2 | -1.2 | -1.1 | Suppresses a choline-transport mutant                                                         |         | orf19.5815  |
| CA6140 | IPF1882     | -1.0 | -1.1 | -1.0 | -1.1 | unknown function                                                                              | YBL028c | orf19.5905  |
| CA2096 | IPF11491    | 1.1  | -1.0 | -1.2 | -1.1 | unknown function                                                                              | YKR023w | orf19.2391  |
| CA3339 | IPF20131    | 1.0  | 1.0  | 1.0  | -1.1 | unknown function                                                                              | YDR446w | orf19.2332  |
| CA3167 | IPF9632     | -1.1 | -1.2 | -1.1 | -1.1 | unknown function                                                                              | YHL010c | orf19.1576  |
| CA1128 | IPF5198     | -1.1 | -1.2 | -1.1 | -1.1 | unknown function                                                                              | YMR093w | orf19.3609  |
| CA5127 | CYS3        | -1.1 | 1.3  | 1.2  | -1.1 | cystathionine gamma-lyase by homology                                                         | YAL012w | orf19.6402  |
| CA1085 | IPF1038     | -1.0 | 1.0  | 1.0  | -1.1 | unknown function                                                                              |         | orf19.4570  |
| CA5664 | IPF1252     | -1.0 | -1.0 | -1.0 | -1.1 | Conserved hypothetical protein                                                                | YIL096c | orf19.7366  |
| CA2994 | IPF9116     | -1.1 | -1.0 | -1.2 | -1.1 | unknown function                                                                              |         | orf19.6119  |
| CA2371 | IPF10333    | -1.0 | -1.0 | -1.1 | -1.1 | unknown function                                                                              | YER149c | orf19.1835  |
| CA5801 | DAL1        | 1.0  | 1.1  | 1.1  | -1.1 | allantoinase                                                                                  | YIR027c | orf19.5454  |
| CA3598 | SEC2        | -1.2 | -1.1 | -1.1 | -1.1 | GDP/GTP exchange factor (by homology)                                                         | YNL272c | orf19.12394 |
| CA4012 | GPA2        | 1.1  | 1.1  | 1.2  | -1.1 | nucleotide-binding regulatory protein GPA2                                                    | YER020w | orf19.1621  |
| CA2925 | IPF7827     | 1.0  | -1.0 | 1.0  | -1.1 | unknown function                                                                              | YGR110w | orf19.4210  |
| CA0278 | IPF15772    | -1.0 | 1.0  | -1.0 | -1.1 | unknown function                                                                              |         |             |
| CA0449 | MOT2.3      | 1.1  | -1.0 | -1.0 | -1.1 | transcriptional repressor, 3-prime end (by homology)                                          | YER068w | orf19.2379  |
| CA5243 | IPF3040     | -1.0 | -1.1 | -1.1 | -1.1 | unknown function                                                                              |         | orf19.5020  |
| CA0877 | CNH1.5F     | -1.1 | 1.0  | -1.1 | -1.1 | Na <sup>+</sup> /H <sup>+</sup> antiporter, 5-prime end (by homology)                         | YLR138w | orf19.8000  |
| CA2727 | IPF10318    | 1.1  | -1.0 | -1.1 | -1.1 | similar to <i>Saccharomyces cerevisiae</i> Ndt80p meiosis-sp                                  | YHR124w | orf19.2119  |
| CA4506 | GCD10       | -1.0 | -1.1 | -1.2 | -1.1 | translation initiation factor eIF3 RNA-binding subunit (by homology)                          | YNL062c | orf19.500   |
| CA1405 | IPF19554.3F | -1.0 | 1.0  | -1.1 | -1.1 | unknown function, 3-prime end                                                                 |         | orf19.3371  |
| CA4342 | IPF3629     | 1.0  | 1.0  | 1.1  | -1.1 | RNA (guanine-N7-) methyltransferase                                                           | YBR236c | orf19.6716  |
| CA2781 | IPF3821     | 1.0  | -1.0 | -1.0 | -1.1 | unknown function                                                                              |         | orf19.284   |

|        |              |      |      |      |      |                                                                                               |                            |             |
|--------|--------------|------|------|------|------|-----------------------------------------------------------------------------------------------|----------------------------|-------------|
| CA5959 | SRB7         | 1.1  | -1.1 | -1.0 | -1.1 | DNA-directed RNA polymerase II holoenzyme and korn                                            | YDR308c                    | orf19.7548  |
| CA2207 | IPF12169     | 1.0  | -1.0 | -1.0 | -1.1 | unknown function                                                                              | YHR017w                    | orf19.8316  |
| CA4677 | HOG1         | 1.1  | 1.0  | -1.0 | -1.1 | Ser/thr protein kinase of MAPK family                                                         | YLR113w                    | orf19.895   |
| CA2484 | IPF9846      | -1.0 | -1.0 | -1.1 | -1.1 | unknown function                                                                              |                            | orf19.10714 |
| GFPTag |              | 1.0  | 1.0  | 1.0  | -1.1 |                                                                                               |                            |             |
| CA2471 | TOP2         | -1.1 | -1.1 | -1.2 | -1.1 | Topoisomerase II                                                                              | YNL088w                    | orf19.2873  |
| CA5528 | RPN7         | -1.0 | 1.0  | -1.1 | -1.1 | Subunit of the regulatory particle of the proteasome (by                                      | YPR108w                    | orf19.7286  |
| CA3456 | IPF19986     | -1.0 | 1.0  | -1.3 | -1.1 | unknown function                                                                              | YGL131c                    | orf19.1259  |
| CA4147 | ADE8         | 1.1  | -1.1 | -1.1 | -1.1 | Phosphoribosylglycinamide formyltransferase (GART)                                            | YDR408c                    | orf19.13211 |
| CA5642 | INP52        | -1.0 | -1.1 | -1.1 | -1.1 | phosphatidylinositol phosphate phosphatase (by homolo                                         | YOR109w                    | orf19.7052  |
| CA0254 | IPF14968     | 1.0  | -1.1 | -1.1 | -1.1 | unknown function                                                                              |                            | orf19.3461  |
| CA0729 | IPF7338      | -1.0 | 1.0  | -1.1 | -1.1 | unknown function                                                                              |                            | orf19.11210 |
| CA6085 | IPF32        | -1.0 | 1.0  | -1.2 | -1.1 | similar to <i>Saccharomyces cerevisiae</i> Apg9p integral me                                  | YDL149w                    | orf19.5974  |
| CA5359 | TIF35        | 1.0  | -1.1 | -1.3 | -1.1 | translation initiation factor eIF3, p33 subunit (by homolo                                    | YDR429c                    | orf19.7236  |
| CA1545 | CDR3.5EOC    | -1.1 | 1.0  | -1.2 | -1.1 | ABC transporter, multidrug resistance protein, 5-prime end                                    |                            | orf19.1313  |
| CA1845 | IPF11123     | 1.1  | -1.1 | -1.1 | -1.1 | similar to <i>Saccharomyces cerevisiae</i> Sdh2p succinate d                                  | YLL041c                    | orf19.637   |
| CA2629 | IPF10911     | 1.1  | -1.1 | -1.1 | -1.1 | unknown function                                                                              | YIL110w                    | orf19.12224 |
| CA5541 | IPF2827      | -1.0 | -1.1 | 1.0  | -1.1 | unknown function                                                                              |                            | orf19.7303  |
| CA3362 | IPF9789      | -1.2 | -1.1 | -1.2 | -1.1 | unknown function                                                                              | YDR479c                    | orf19.9489  |
| CA0258 | IPF17112     | -1.1 | -1.1 | -1.2 | -1.1 | thiosulfate sulfurtransferase (by homology)                                                   | YOR251c                    | orf19.1356  |
| CA4590 | IPF2218      | 1.1  | -1.1 | 1.0  | -1.1 | unknown function                                                                              | YDL156w                    | orf19.6907  |
| CA1394 | IFO2         | -1.2 | -1.1 | -1.1 | -1.1 | unknown function                                                                              |                            | orf19.9334  |
| CA5197 | IPF2342      | -1.2 | -1.0 | -1.4 | -1.1 | unknown function                                                                              | YPL012w                    | orf19.7011  |
| CA2788 | RAD26        | 1.1  | -1.0 | -1.2 | -1.1 | DNA repair and recombination protein (by homology)                                            | YJR035w ; Missing in array | orf19.8240  |
| CA4432 | IPF5574      | -1.1 | -1.2 | -1.3 | -1.1 | unknown function                                                                              | YLL003w                    | orf19.5163  |
| CA2336 | PF13383.53EO | -1.1 | -1.1 | -1.2 | -1.1 | unknown function, internal fragment                                                           | YOR086c                    | orf19.2353  |
| CA4452 | IPF3514      | 1.0  | 1.1  | 1.0  | -1.1 | unknown function                                                                              | YDR255c                    | orf19.6850  |
| CA2004 | POL12        | -1.0 | -1.1 | -1.0 | -1.1 | DNA-directed DNA polymerase alpha (by homology)                                               | YBL035c                    | orf19.2796  |
| CA3132 | IPF8904      | 1.0  | 1.0  | -1.0 | -1.1 | unknown function                                                                              | YOR338w                    | orf19.1363  |
| CA1859 | IPF19614     | 1.0  | -1.0 | -1.0 | -1.1 | putative transcription factor similar to positive activator of the proline utilisation pathwa |                            | orf19.9073  |
| CA1757 | IPF14559.5F  | -1.1 | -1.0 | -1.1 | -1.1 | unknown function, 5-prime end                                                                 |                            | orf19.5128  |
| CA5864 | IPF364       | -1.0 | -1.2 | -1.2 | -1.1 | transaminase type I (by homology)                                                             |                            | orf19.7522  |
| CA0846 | SMC3         | -1.1 | 1.0  | -1.1 | -1.1 | required for structural maintenance of chromosomes (b)                                        | YJL074c                    | orf19.7895  |
| CA0334 | IPF19562     | -1.3 | -1.1 | -1.2 | -1.1 | unknown function                                                                              |                            | orf19.7824  |
| CA3429 | IPF6380      | 1.1  | 1.1  | -1.0 | -1.1 | unknown function                                                                              | YDR031w                    | orf19.588   |
| CA2424 | IPF18468     | -1.2 | -1.2 | -1.2 | -1.1 | unknown function                                                                              |                            | orf19.11948 |
| CA0986 | IPF4814      | -1.0 | -1.0 | -1.1 | -1.1 | similar to <i>Saccharomyces cerevisiae</i> Mrp20p ribosomal                                   | YDR405w                    | orf19.3350  |
| CA1224 | IPF15662     | -1.1 | -1.0 | -1.1 | -1.1 | unknown function                                                                              |                            | orf19.4156  |
| CA3194 | IPF3425      | -1.1 | -1.1 | -1.1 | -1.1 | unknown function                                                                              | YIL115c                    | orf19.6171  |
| CA4229 | IPF12480.5   | -1.1 | -1.0 | -1.1 | -1.1 | unknown function, 5-prime end                                                                 |                            |             |
| CA4690 | IPF3959      | -1.0 | -1.0 | -1.0 | -1.1 | unknown function                                                                              |                            | orf19.8494  |
| CA0612 | IPF17545     | -1.1 | -1.0 | -1.1 | -1.1 | unknown function                                                                              |                            | orf19.5579  |
| CA1374 | MIP1         | -1.2 | 1.0  | 1.1  | -1.1 | Mitochondrial intermediate peptidase (by homology)                                            | YKL134c                    | orf19.1195  |
| CA4322 | IPF2097      | -1.1 | -1.0 | -1.2 | -1.1 | unknown function                                                                              |                            | orf19.4097  |
| CA5823 | COQ1         | -1.2 | -1.2 | -1.2 | -1.1 | Hexaprenyl pyrophosphate synthetase (by homology)                                             | YBR003w                    | orf19.7478  |
| CA2107 | IPF10716     | 1.1  | -1.1 | -1.0 | -1.1 | unknown function                                                                              | YGR033c                    | orf19.3691  |
| CA6108 | SEC7         | -1.3 | 1.1  | -1.3 | -1.1 | Guanine nucleotide exchange protein for ADP-robosylai                                         | YDR170c                    | orf19.5947  |
| CA5111 | SSY5         | -1.1 | -1.0 | -1.1 | -1.1 | Involved in sulfonylurea herbicide sensitivity (by homolo                                     | YJL156c                    | orf19.6422  |
| CA2688 | IFU6.5F      | -1.1 | 1.0  | 1.0  | -1.1 | Putative ortholog of <i>S. cerevisiae</i> Gre2p, 5-prime end                                  |                            | orf19.2581  |

|        |             |      |      |      |      |                                                                  |         |             |
|--------|-------------|------|------|------|------|------------------------------------------------------------------|---------|-------------|
| CA6110 | IPF91       | 1.0  | -1.1 | -1.2 | -1.1 | unknown function                                                 | YHR150w | orf19.5943  |
| CA2249 | POL2        | -1.1 | -1.1 | -1.2 | -1.1 | DNA-directed DNA polymerase epsilon, catalytic subunit           | YNL262w | orf19.2365  |
| CA4507 | IPF20015    | 1.1  | 1.0  | -1.0 | -1.1 | unknown function                                                 | YNL063w | orf19.499   |
| CA6137 | IPF4356     | -1.0 | 1.0  | -1.1 | -1.1 | unknown function                                                 | YPR031w | orf19.5910  |
| CA3002 | PIF1        | -1.0 | -1.1 | -1.1 | -1.1 | mitochondrial DNA helicase (by homology)                         | YML061c | orf19.6133  |
| CA1676 | ERG9        | -1.4 | 1.0  | -1.0 | -1.1 | farnesyl-diphosphate farnesyltransferase                         | YHR190w | orf19.3616  |
| CA5134 | IPF5131     | -1.0 | 1.1  | 1.0  | -1.1 | unknown function                                                 |         | orf19.6391  |
| CA4953 | IPF4567.3   | -1.0 | -1.1 | -1.1 | -1.1 | unknown function, 3-prime end                                    |         | orf19.6525  |
| CA3652 | NBP35       | -1.1 | 1.0  | -1.1 | -1.1 | Nucleotide-binding protein (by homology).                        |         | orf19.2043  |
| CA3101 | IPF6593     | -1.0 | -1.2 | -1.3 | -1.1 | similar to <i>Saccharomyces cerevisiae</i> Rfx1p DNA-binding     | YLR176c | orf19.3865  |
| CA0583 | GSH1.EXON2  | -1.2 | -1.1 | -1.2 | -1.1 | gamma-glutamylcysteine synthetase, exon 2 (by homology)          | YJL101c | orf19.12526 |
| CA0247 | RIB21       | -1.0 | -1.0 | -1.0 | -1.1 | DRAP deaminase (by homology)                                     |         | orf19.2788  |
| CA3956 | IPF6712.3F  | -1.1 | 1.1  | -1.2 | -1.1 | unknown function, 3-prime end                                    |         |             |
| CA5266 | IPF1787.3F  | -1.1 | 1.0  | 1.1  | -1.1 | unknown function, 3-prime end                                    | YBL029w | orf19.4996  |
| CA3229 | FUN30       | 1.0  | -1.1 | -1.3 | -1.1 | helicases of the Snf2/Rad54 family (by homology)                 | YAL019w | orf19.6291  |
| CA1858 | IPF15344    | -1.1 | 1.0  | -1.2 | -1.1 | unknown function                                                 |         | orf19.9076  |
| CA4509 | IPF8973     | 1.0  | -1.1 | -1.2 | -1.1 | unknown function                                                 | YNL136w | orf19.497   |
| CA6053 | IPF4949     | 1.0  | -1.0 | -1.0 | -1.1 | unknown function                                                 | YNL321w | orf19.7670  |
| CA1005 | LPG7        | -1.0 | -1.0 | -1.1 | -1.1 | probable membrane protein (by homology)                          | YPL101w | orf19.3759  |
| CA0319 | IPF15244.3F | -1.0 | -1.1 | -1.2 | -1.1 | unknown function, 3-prime end                                    |         |             |
| CA0681 | IPF14511.3F | -1.1 | -1.0 | -1.0 | -1.1 | unknown function, 3-prime end                                    |         | orf19.12170 |
| CA0983 | CBR1        | 1.0  | -1.1 | -1.0 | -1.1 | Cytochrome-b5 reductase (by homology)                            | YIL043c | orf19.1801  |
| CA2843 | ALK5.5F     | 1.0  | -1.0 | -1.1 | -1.1 | n-alkane-inducible cytochrome P-450, 5-prime end                 |         | orf19.5728  |
| CA5240 | IPF3032     | -1.2 | -1.2 | -1.1 | -1.1 | allantoate permease (by homology)                                |         | orf19.5023  |
| CA1961 | IPF14284    | -1.1 | -1.1 | -1.1 | -1.1 | putative dnaJ-like protein (by homology)                         | YNL227c | orf19.2399  |
| CA3150 | IPF4035     | 1.1  | -1.0 | 1.0  | -1.1 | unknown function                                                 |         | orf19.6166  |
| CA2062 | IPF7858     | 1.0  | -1.1 | -1.2 | -1.1 | similar to <i>Saccharomyces cerevisiae</i> Prp24p U4/U6 splicing | YMR268c | orf19.2563  |
| CA4123 | AMS1        | -1.2 | -1.1 | -1.1 | -1.1 | alpha-mannosidase (by homology)                                  | YGL156w | orf19.2768  |
| CA4098 | IPF3988     | 1.0  | -1.1 | 1.0  | -1.1 | unknown function                                                 |         | orf19.664   |
| CA5631 | GLN4        | -1.0 | -1.0 | -1.1 | -1.1 | glutamyl-tRNA synthetase (by homology)                           | YOR168w | orf19.7064  |
| CA1047 | IPF11615    | -1.1 | -1.0 | -1.1 | -1.1 | RNA-binding proteins (by homology)                               | YPR112c | orf19.9215  |
| CA1706 | NMD3        | -1.0 | -1.0 | 1.1  | -1.1 | RNA binding (by homology)                                        | YHR170w | orf19.706   |
| CA1909 | IPF20091    | 1.0  | -1.1 | -1.0 | -1.1 | unknown function                                                 |         | orf19.10303 |
| CA5907 | SSN6        | -1.1 | 1.0  | -1.3 | -1.1 | transcriptional repressor (by homology)                          | YBR112c | orf19.6798  |
| CA4605 | IPF6226     | -1.0 | -1.0 | -1.0 | -1.1 | unknown function                                                 |         | orf19.3295  |
| CA1900 | ARK1        | -1.2 | -1.0 | -1.1 | -1.1 | actin regulating serine/threonine kinase (by homology)           |         | orf19.2605  |
| CA2732 | IPF10327    | -1.0 | -1.1 | -1.0 | -1.1 | unknown function                                                 | YLR324w | orf19.2113  |
| CA2437 | PHO86       | -1.0 | -1.1 | -1.1 | -1.1 | inorganic phosphate transporter by homology                      | YJL117w | orf19.2199  |
| CA0304 | IPF12829    | -1.0 | -1.1 | -1.1 | -1.1 | unknown function                                                 | YLL035w | orf19.8340  |
| CA5692 | UTR1        | -1.1 | -1.0 | -1.0 | -1.1 | Associated with ferric reductase activity (by homology)          | YJR049c | orf19.7393  |
| CA1322 | GCD11       | -1.0 | 1.1  | -1.1 | -1.1 | Translation initiation factor eIF2 (by homology)                 | YER025w | orf19.4223  |
| CA3800 | RPL7A.3     | 1.0  | -1.1 | -1.2 | -1.1 | 60S Ribosomal Protein L7-A, 3-prime end                          | YPL198w |             |
| CA3350 | RPL18A.5    | 1.1  | -1.0 | 1.0  | -1.1 | ribosomal protein S18.e, 5-prime end (by homology)               |         |             |
| CA2308 | IPF9874.3   | 1.1  | -1.0 | 1.1  | -1.1 | similar to <i>Saccharomyces cerevisiae</i> Inp51p phosphatidyl   | YIL002c | orf19.8953  |
| CA0069 | F19295.5EOC | 1.2  | 1.3  | -1.4 | -1.1 | unknown function, internal fragment                              |         | orf19.6468  |
| CA0084 | NAB3        | -1.1 | -1.1 | -1.2 | -1.1 | polyadenylated RNA-binding protein (by homology)                 | YPL190c | orf19.12976 |
| CA3266 | IPF5045     | 1.0  | -1.1 | -1.1 | -1.1 | unknown function                                                 | YMR171c | orf19.2703  |
| CA3997 | LOC1        | -1.0 | -1.1 | -1.0 | -1.1 | putative double-stranded RNA-binding protein (by homology)       | YFR001w | orf19.1642  |
| CA4063 | SDH11       | -1.1 | -1.1 | -1.1 | -1.1 | Succinate dehydrogenase (by homology)                            | YKL148c | orf19.440   |



|        |             |      |      |      |      |                                                                              |         |             |
|--------|-------------|------|------|------|------|------------------------------------------------------------------------------|---------|-------------|
| CA3710 | CHS3.5F     | 1.0  | 1.0  | -1.3 | -1.1 | chitin-UDP acetyl-glucosaminyl transferase 3, 3-prime end                    |         | orf19.4938  |
| CA2209 | IPF18512    | -1.0 | -1.1 | -1.1 | -1.1 | unknown function                                                             | YOR107w | orf19.695   |
| CA4903 | SNF7        | 1.0  | -1.0 | -1.1 | -1.1 | Class E Vps protein (by homology)                                            | YLR025w | orf19.6040  |
| CA3519 | IPF6787     | -1.0 | -1.1 | -1.1 | -1.1 | unknown function                                                             |         | orf19.8613  |
| CA0420 | IPF9048     | 1.0  | 1.0  | 1.2  | -1.1 | unknown function                                                             | YPR093c | orf19.2229  |
| CA1398 | IPF19913    | -1.1 | -1.1 | -1.0 | -1.1 | unknown function                                                             | YNL128w | orf19.3699  |
| CA1927 | YBN5        | -1.0 | -1.1 | -1.1 | -1.1 | Putative purine nucleotide-binding protein (by homology)                     | YBR025c | orf19.754   |
| CA1478 | IPF16426    | -1.0 | -1.1 | -1.1 | -1.1 | similar to human BRRN1 (by homology)                                         | YBL097w | orf19.1251  |
| CA4091 | IPF5005     | -1.0 | 1.0  | -1.1 | -1.1 | unknown function                                                             |         | orf19.6650  |
| CA0408 | SAC6.5F     | -1.4 | -1.1 | -1.2 | -1.1 | actin filament bundling protein, fimbrin, 5-prime end (by homology)          | YDR129c | orf19.5544  |
| CA2678 | IPF5834     | -1.1 | -1.1 | -1.1 | -1.1 | unknown function                                                             |         | orf19.12946 |
| CA4490 | IPF4045     | 1.0  | -1.1 | -1.2 | -1.1 | unknown function                                                             |         | orf19.9428  |
| CA0160 | GAP7.5EOC   | 1.0  | -1.1 | 1.0  | -1.1 | general amino acid permease, 5-prime end                                     |         | orf19.10706 |
| CA5842 | LEU1        | -1.6 | -1.0 | -1.2 | -1.1 | 3-isopropylmalate dehydratase (by homology)                                  | YGL009c | orf19.7498  |
| CA2671 | IPF5856     | -1.1 | -1.1 | -1.2 | -1.1 | 4-hydroxyphenylpyruvate dioxygenase (by homology)                            |         | orf19.5499  |
| CA3412 | IPF9238     | 1.0  | -1.1 | -1.2 | -1.1 | long chain fatty alcohol oxidase (by homology)                               |         | orf19.13562 |
| CA0213 | CDS1        | 1.0  | -1.1 | -1.1 | -1.1 | CDP-diacylglycerol synthase (by homology)                                    | YBR029c | orf19.1279  |
| CA4510 | IPF8970     | -1.1 | -1.1 | -1.1 | -1.1 | similar to <i>Saccharomyces cerevisiae</i> Msh1p DNA mismatch repair protein | YHR120w | orf19.496   |
| CA1608 | TES12       | 1.1  | -1.1 | -1.0 | -1.1 | Thioesterase (by homology)                                                   | YJR019c | orf19.4122  |
| CA1421 | MRPL11      | 1.1  | -1.3 | -1.2 | -1.1 | Mitochondrial ribosomal protein (by homology)                                | YDL202w | orf19.11278 |
| CA2770 | CPS1        | 1.1  | -1.1 | -1.1 | -1.1 | Carboxypeptidase YSCS precursor, second fragment (by homology)               | YJL172w | orf19.2686  |
| CA5961 | IFA14       | 1.0  | 1.0  | -1.0 | -1.1 | unknown function                                                             |         | orf19.7550  |
| CA4944 | MSK1        | -1.1 | -1.0 | -1.0 | -1.1 | lysyl-tRNA synthetase by homology                                            | YNL073w | orf19.6533  |
| CA5521 | HEM12       | -1.1 | -1.1 | -1.2 | -1.1 | uroporphyrinogen decarboxylase (by homology)                                 | YDR047w | orf19.5369  |
| CA2378 | GLE1        | -1.1 | -1.1 | -1.1 | -1.1 | RNA export mediator (by homology)                                            | YDL207w | orf19.2215  |
| CA3452 | IPF10541    | -1.1 | -1.1 | -1.1 | -1.1 | unknown function                                                             | YFR034c | orf19.1253  |
| CA5718 | LCP5        | -1.1 | -1.1 | -1.1 | -1.1 | Ngg1p interacting protein (by homology)                                      | YER127w | orf19.7422  |
| CA2751 | IPF19558    | -1.2 | -1.0 | -1.1 | -1.1 | unknown function                                                             | YNL258c | orf19.2370  |
| CA1990 | TOP1        | 1.0  | -1.1 | -1.1 | -1.1 | CANAL DNA TOPOISOMERASE I                                                    | YOL006c | orf19.7742  |
| CA5294 | IPF1952     | -1.1 | -1.2 | -1.3 | -1.1 | unknown function                                                             |         | orf19.7157  |
| CA1189 | RPL24A      | 1.1  | -1.3 | -1.4 | -1.1 | ribosomal protein L24 (by homology)                                          | YGL031c | orf19.11269 |
| CA5617 | SPL1        | -1.1 | -1.0 | 1.0  | -1.1 | tRNA splicing protein                                                        | YCL017c | orf19.7081  |
| CA0843 | IPF18853    | -1.0 | -1.1 | -1.2 | -1.1 | unknown function                                                             | YLL023c | orf19.8656  |
| CA2547 | IPF14911    | -1.2 | -1.1 | -1.2 | -1.1 | unknown function                                                             | YNL152w | orf19.2832  |
| CA1740 | SMI1        | -1.2 | -1.1 | -1.2 | -1.1 | beta-1,3-glucan synthesis protein (by homology)                              | YGR229c | orf19.5058  |
| CA4821 | IPF1197     | -1.0 | -1.1 | 1.0  | -1.1 | unknown function                                                             | YMR130w | orf19.2076  |
| CA4524 | IPF7097     | 1.1  | -1.1 | 1.0  | -1.1 | unknown function                                                             | YJR056c | orf19.480   |
| CA1214 | VPS15.53F   | -1.1 | -1.0 | -1.2 | -1.1 | serine/threonine protein kinase, internal fragment                           |         | orf19.129   |
| CA2835 | IPF12091    | -1.0 | -1.0 | -1.2 | -1.1 | Unknown function                                                             |         | orf19.4787  |
| CA2924 | FET33       | 1.0  | -1.1 | -1.0 | -1.1 | cell surface ferroxidase (by homology)                                       | YMR058w | orf19.11687 |
| CA3307 | RPL2.3      | 1.0  | 1.0  | -1.2 | -1.1 | ribosomal protein L8, 3-prime end (by homology)                              | YIL018w |             |
| CA4171 | IPF7785     | 1.0  | 1.0  | 1.1  | -1.1 | unknown function                                                             |         | orf19.2962  |
| CA4175 | F4425.REPEA | -1.0 | -1.0 | 1.1  | -1.1 | unknown function                                                             |         | orf19.2958  |
| CA1999 | IPF19513    | -1.1 | -1.1 | -1.0 | -1.1 | unknown function                                                             | YLR114c | orf19.13830 |
| CA3473 | PF6305.EXON | 1.0  | -1.1 | -1.0 | -1.1 | unknown function, exon 1                                                     | YDL139c | orf19.1668  |
| CA5879 | IPF12076    | 1.1  | -1.3 | -1.2 | -1.1 | enoyl CoA hydratase (by homology)                                            |         | orf19.6830  |
| CA4002 | IPF4258     | -1.2 | -1.1 | -1.2 | -1.1 | unknown function                                                             |         | orf19.1634  |
| CA5356 | IRR1.5F     | -1.1 | -1.0 | -1.2 | -1.1 | cohesin complex subunit, 5-prime end (by homology)                           | YIL026c | orf19.7233  |
| CA5964 | IPF963      | -1.1 | -1.2 | -1.1 | -1.1 | unknown function                                                             |         | orf19.7553  |

|        |              |      |      |      |      |                                                               |                            |             |
|--------|--------------|------|------|------|------|---------------------------------------------------------------|----------------------------|-------------|
| CA3851 | CTA21        | 1.1  | 1.0  | -1.0 | -1.1 | transcriptional activation                                    |                            | orf19.6112  |
| CA5740 | IPF20030     | 1.0  | 1.0  | -1.0 | -1.1 | unknown function                                              | YNL166c                    | orf19.7450  |
| CA6040 | CPR6         | -1.2 | 1.1  | -1.3 | -1.1 | cyclophilin (by homology)                                     | YLR216c                    | orf19.7654  |
| CA2284 | MIF2         | -1.0 | 1.0  | -1.1 | -1.1 | required for normal chromosome segregation and spind          | YKL089w                    | orf19.5551  |
| CA1287 | IPF5545      | -1.1 | -1.1 | -1.3 | -1.1 | unknown function                                              | YDR330w                    | orf19.4430  |
| CA3886 | IPF12963     | -1.2 | 1.0  | 1.0  | -1.1 | ubiquitin-mediated protein degradation (by homology)          |                            | orf19.5094  |
| CA2991 | IPF5088.3    | 1.0  | 1.0  | 1.0  | -1.1 | unknown function, 3-prime end                                 | YMR233w                    | orf19.6013  |
| CA2306 | IPF6510      | -1.0 | 1.0  | -1.0 | -1.1 | unknown function                                              |                            | orf19.1685  |
| CA3645 | IPF4127      | -1.0 | -1.1 | -1.1 | -1.1 | putative dimeric dihydrodiol dehydrogenase (by homology)      |                            | orf19.2036  |
| CA0970 | IPF10894     | 1.1  | 1.0  | 1.0  | -1.1 | unknown function                                              | YGR120c                    | orf19.10340 |
| CA0280 | IPF10566     | -1.1 | -1.0 | 1.1  | -1.1 | unknown function                                              | YDR315c                    | orf19.1439  |
| CA5791 | RPT2         | -1.1 | -1.2 | -1.4 | -1.1 | 26S proteasome regulatory subunit (by homology)               | YDL007w                    | orf19.5440  |
| CA2206 | IPF12173     | 1.0  | -1.1 | 1.0  | -1.1 | unknown function                                              | YIL090w ; Missing in array | orf19.698   |
| CA2486 | IPF9851      | -1.1 | -1.1 | -1.1 | -1.1 | unknown function                                              | YCR040w                    | orf19.10712 |
| CA0565 | IPF13526     | -1.0 | -1.1 | -1.1 | -1.1 | unknown function                                              | YPR129w                    | orf19.6250  |
| CA5703 | IPF2463      | 1.0  | 1.0  | -1.1 | -1.1 | unknown function                                              | YML020w                    | orf19.7403  |
| CA0566 | IPF13522     | 1.0  | -1.1 | -1.1 | -1.1 | unknown function                                              | YPR133c                    | orf19.6252  |
| CA2984 | PF12606.3EOC | -1.2 | -1.1 | -1.2 | -1.1 | unknown function, 3-prime end                                 |                            |             |
| CA1138 | IFN3         | -1.0 | -1.0 | 1.0  | -1.1 | glycerophosphoinositol transporter (by homology)              |                            | orf19.1978  |
| CA0685 | ADO1         | 1.1  | -1.0 | 1.0  | -1.1 | adenosine kinase (by homology)                                | YJR105w                    | orf19.13037 |
| CA3572 | IPF18321     | -1.0 | 1.0  | -1.0 | -1.1 | unknown function                                              | Missing in array           |             |
| CA3183 | TSM1.3F      | -1.0 | 1.0  | -1.2 | -1.1 | component of TFIID complex, 3-prime end (by homology)         | YCR042c                    | orf19.2135  |
| CA3185 | IPF13637     | 1.1  | 1.0  | 1.1  | -1.1 | unknown function                                              |                            | orf19.2137  |
| CA3679 | IPF20142     | -1.0 | 1.0  | -1.0 | -1.1 | unknown function                                              | YFL047w                    | orf19.730   |
| CA5466 | PWP2         | -1.0 | 1.1  | -1.1 | -1.1 | periodic tryptophan protein (by homology)                     | YCR057c                    | orf19.3276  |
| CA2905 | IPF12049     | -1.2 | -1.1 | -1.1 | -1.1 | unknown function                                              | YGL066w                    | orf19.10977 |
| CA4107 | IPF3970      | -1.1 | -1.1 | -1.1 | -1.1 | unknown function                                              | YLR177w                    | orf19.671   |
| CA5103 | IPF1367      | 1.0  | 1.1  | -1.0 | -1.1 | unknown function                                              |                            | orf19.6436  |
| CA0525 | MSB1         | -1.0 | 1.0  | 1.1  | -1.1 | Morphogenesis-related protein (by homology)                   | YOR188w                    | orf19.8726  |
| CA3113 | IPF15737     | -1.1 | -1.0 | -1.1 | -1.1 | similar to <i>Saccharomyces cerevisiae</i> Rvb2p RuvB-like    | YPL235w                    | orf19.13892 |
| CA2633 | KEX2         | -1.3 | -1.1 | -1.4 | -1.1 | Kexin precursor (KEX2 protease)                               | YNL238w                    | orf19.4755  |
| CA0348 | IFK1         | -1.0 | 1.0  | -1.0 | -1.1 | probable monooxygenase (by homology)                          |                            | orf19.9098  |
| CA4872 | SEC231       | -1.2 | -1.1 | -1.2 | -1.1 | Component of COPII coat (by homology)                         |                            | orf19.6558  |
| CA3224 | GLC7         | -1.3 | 1.0  | 1.0  | -1.1 | Ser/thr phosphoprotein phosphatase 1 (by homology)            | YER133w                    | orf19.6285  |
| CA2531 | RIB2         | -1.2 | -1.2 | -1.2 | -1.1 | DRAP deaminase (by homology)                                  | YOL066c                    | orf19.3177  |
| CA1448 | IPF14728     | -1.1 | 1.0  | -1.1 | -1.1 | unknown function                                              |                            | orf19.192   |
| CA4908 | IPF1445      | -1.1 | 1.1  | -1.2 | -1.1 | similar to <i>Saccharomyces cerevisiae</i> Apc1p subunit of a | YNL172w                    | orf19.6046  |
| CA4974 | IPF4704      | 1.0  | -1.1 | -1.2 | -1.1 | unknown Function                                              | YJR111c                    | orf19.5278  |
| CA1569 | IPF7616      | 1.1  | -1.1 | -1.2 | -1.1 | putative homoserine O-acetyltransferase (by homology)         |                            | orf19.1159  |
| CA0462 | MRPS28       | 1.0  | -1.1 | -1.1 | -1.1 | ribosomal protein (by homology)                               | YDR337w                    | orf19.2520  |
| CA3819 | IPF6993      | -1.0 | -1.1 | -1.1 | -1.1 | unknown function                                              | YBR231c                    | orf19.5772  |
| CA0802 | IPF14060     | -1.1 | -1.1 | -1.0 | -1.1 | unknown function                                              |                            | orf19.3498  |
| CA3992 | VAM6.3F      | -1.3 | -1.1 | -1.4 | -1.1 | Vacuolar carboxypeptidase Y, 3-prime end (by homolog          | YDL077c                    | orf19.1568  |
| CA5819 | IFF4         | 1.1  | -1.1 | -1.1 | -1.1 | Unknown function                                              |                            | orf19.7472  |
| CA3823 | IPF10651     | -1.1 | -1.0 | -1.1 | -1.1 | unknown function                                              | YJL061w                    | orf19.5765  |
| CA1884 | IPF5486      | 1.1  | 1.0  | 1.0  | -1.1 | unknown function                                              |                            | orf19.2208  |
| CA1446 | YAL011       | -1.0 | -1.1 | -1.1 | -1.1 | mitochondrial transit peptide (by homology)                   |                            | orf19.190   |
| CA4435 | SAP190       | -1.3 | -1.0 | -1.3 | -1.1 | phosphatase associated protein by homology                    | YKR028w                    | orf19.5160  |
| CA0743 | RNA14.3EOC   | -1.1 | -1.0 | -1.1 | -1.1 | component of pre-mRNA 3'-end processing factor CF I,          | YMR061w                    |             |

|         |              |      |      |      |      |                                                                    |                            |             |
|---------|--------------|------|------|------|------|--------------------------------------------------------------------|----------------------------|-------------|
| CA4166  | TIF34        | -1.2 | -1.2 | -1.2 | -1.1 | Translation initiation factor eIF3, p39 subunit                    | YMR146c                    | orf19.2967  |
| CA0230  | TOM37        | -1.1 | -1.2 | -1.2 | -1.1 | Mitochondrial outer membrane import receptor subunit (by homology) |                            | orf19.1532  |
| CA4094  | IPF4004      | -1.1 | -1.1 | -1.3 | -1.1 | unknown function                                                   | YCL061c                    | orf19.658   |
| CA1354  | GCD6         | -1.0 | -1.1 | -1.2 | -1.1 | translation initiation factor- like protein                        | YDR211w                    | orf19.407   |
| CA6045  | IPF4929      | -1.1 | -1.0 | -1.0 | -1.1 | similar to Saccharomyces cerevisiae Hmi1p mitochondr               | YOL095c                    | orf19.7661  |
| CA2605  | SRP1         | -1.0 | 1.0  | 1.2  | -1.1 | alpha importin by homology                                         | YNL189w                    | orf19.5682  |
| CA3756  | IPF8884      | -1.1 | -1.0 | -1.3 | -1.1 | unknown function                                                   | YLR454w                    | orf19.3422  |
| CA1191  | CAN2         | -1.0 | -1.3 | -1.5 | -1.1 | amino acid permease (by homology)                                  | YEL063c                    | orf19.111   |
| CA5126  | SLS1         | 1.0  | 1.0  | -1.1 | -1.1 | Endoplasmic translocation machinery by homology                    | YOL031c ; Missing in array | orf19.6403  |
| CA2121  | IPF7930      | -1.2 | -1.2 | -1.2 | -1.1 | unknown function                                                   | YJL123c                    | orf19.8918  |
| CA0750  | IPF6284      | 1.0  | -1.1 | -1.1 | -1.1 | unknown function                                                   | YHR207c                    | orf19.1972  |
| CA3507  | IPF11375     | -1.2 | -1.1 | -1.2 | -1.1 | unknown function                                                   |                            | orf19.6354  |
| CA5057  | IPF3695      | -1.0 | -1.2 | -1.3 | -1.1 | similar to Saccharomyces cerevisiae Ngg1p general tra              | YDR176w                    | orf19.3023  |
| Gal4 BD |              | -1.0 | -1.0 | -1.1 | -1.1 |                                                                    |                            |             |
| CA1533  | IPF9510      | -1.1 | -1.1 | -1.1 | -1.1 | unknown function                                                   |                            | orf19.8803  |
| CA0361  | IPF2326      | -1.0 | -1.1 | -1.1 | -1.1 | unknown function                                                   |                            | orf19.1124  |
| CA4710  | ORC3         | -1.1 | -1.1 | -1.2 | -1.1 | Origin recognition complex (by homology)                           | YLL004w                    | orf19.6942  |
| CA5064  | CHD1         | -1.2 | -1.1 | -1.3 | -1.1 | transcriptional regulator (by homology)                            | YER164w                    | orf19.3035  |
| CA1571  | SPO14.3EOC   | -1.1 | -1.0 | -1.2 | -1.1 | phospholipase D, 3-prime end                                       | Missing in array           |             |
| CA2307  | PF18488.5EOC | -1.0 | 1.0  | -1.1 | -1.1 | unknown function, 5-prime end                                      |                            |             |
| CA2892  | IPF6688      | -1.1 | -1.0 | -1.1 | -1.1 | unknown function                                                   |                            | orf19.2465  |
| CA1396  | IPF8075      | -1.1 | 1.1  | -1.1 | -1.1 | unknown function                                                   | YLR392c                    | orf19.3701  |
| CA3630  | IPF8129      | -1.2 | -1.1 | -1.1 | -1.1 | unknown function                                                   |                            | orf19.12609 |
| CA4058  | IPF7717      | -1.0 | -1.0 | -1.0 | -1.1 | unknown function                                                   | YGR166w                    | orf19.8063  |
| CA4927  | IPF1401      | 1.1  | -1.2 | -1.2 | -1.1 | similarity to aldehyde dehydrogenase (by homology)                 | YMR110c                    | orf19.6066  |
| CA4224  | IPF8755      | -1.1 | -1.1 | -1.2 | -1.1 | unknown function                                                   |                            | orf19.827   |
| CA2483  | IPF19758     | -1.2 | -1.3 | -1.2 | -1.1 | unknown function                                                   | YJL204c                    | orf19.3203  |
| CA1164  | ARP8         | -1.2 | -1.1 | -1.2 | -1.1 | actin-related protein (by homology)                                | YOR141c                    | orf19.10867 |
| CA5318  | OGG1         | 1.0  | -1.0 | 1.1  | -1.1 | 8-oxoguanine DNA glycosylase (by homology)                         | YML060w                    | orf19.7190  |
| CA4470  | IPF9717      | -1.1 | -1.1 | -1.2 | -1.1 | unknown function                                                   | YPR144c                    | orf19.1902  |
| CA4057  | IPF7719      | -1.1 | -1.1 | -1.1 | -1.1 | unknown function                                                   | YDR306c                    | orf19.432   |
| CA1910  | IPF7260      | -1.1 | -1.1 | -1.1 | -1.1 | unknown function                                                   | YKL018w                    | orf19.10306 |
| CA0382  | IPF16030     | -1.2 | -1.1 | -1.1 | -1.1 | similar to Saccharomyces cerevisiae Bud5p GDP/GTP t                | YCR038c                    | orf19.1842  |
| CA5449  | DAL81        | -1.1 | -1.2 | -1.2 | -1.1 | Transcriptional activator for allantoin and GABA catabol           | YIR023w                    | orf19.3252  |
| CA3251  | IPF4721      | -1.2 | -1.1 | -1.2 | -1.1 | unknown Function                                                   |                            | orf19.3737  |
| CA4401  | IPF8780      | 1.0  | -1.0 | -1.0 | -1.1 | unknown function                                                   |                            | orf19.3109  |
| CA3797  | IPF5623      | -1.2 | -1.1 | -1.0 | -1.1 | unknown function                                                   | YML002w                    | orf19.5821  |
| CA5437  | ERG27        | 1.1  | -1.1 | -1.2 | -1.1 | 3-keto sterol reductase (by homology)                              | YLR100w                    | orf19.3240  |
| CA4575  | IPF9428      | -1.0 | -1.2 | -1.1 | -1.1 | unknown function                                                   | YPL146c                    | orf19.6886  |
| CA5202  | YOX1         | 1.1  | -1.1 | -1.3 | -1.1 | Similar to homoeodomain protein (by homology)                      | YML027w                    | orf19.7017  |
| CA2114  | IPF13744     | 1.0  | -1.0 | -1.1 | -1.1 | protein involved in regulation of carbon metabolism (by            | YNL201c                    | orf19.3685  |
| CA1746  | IPF10886     | -1.1 | -1.1 | -1.2 | -1.1 | unknown function                                                   | YGL236c                    | orf19.5050  |
| CA3477  | IPF3229      | 1.0  | -1.0 | -1.1 | -1.1 | unknown function                                                   | YIL064w                    | orf19.3582  |
| CA1092  | YTA7         | -1.1 | -1.0 | -1.2 | -1.1 | 26S proteasome subunit (by homology)                               | YGR270w                    | orf19.3949  |
| CA0766  | IPF15335     | -1.1 | -1.1 | -1.1 | -1.1 | unknown function                                                   |                            | orf19.12435 |
| CA0849  | HEM4         | -1.0 | 1.0  | 1.1  | -1.1 | uroporphyrinogen III synthase                                      | YOR278w                    | orf19.9311  |
| CA0717  | IPF9785      | -1.1 | -1.1 | -1.1 | -1.1 | unknown function                                                   |                            | orf19.3453  |
| CA3009  | MRPL19       | -1.0 | -1.0 | -1.1 | -1.1 | Ribosomal protein (by homology)                                    | YNL185c                    | orf19.13611 |
| CA0224  | PRP31        | -1.1 | -1.1 | 1.0  | -1.1 | pre-mRNA splicing protein (by homology)                            | YGR091w                    | orf19.1296  |

|        |              |      |      |      |      |                                                               |                            |             |
|--------|--------------|------|------|------|------|---------------------------------------------------------------|----------------------------|-------------|
| CA1805 | IPF6332      | -1.2 | -1.1 | -1.1 | -1.1 | similar to <i>Saccharomyces cerevisiae</i> Bud7p chitin biosy | YOR299w                    | orf19.1112  |
| CA4008 | DYS1         | -1.1 | -1.1 | -1.1 | -1.1 | deoxyhypusine synthase                                        | YHR068w                    | orf19.1626  |
| CA2889 | IPF13628     | -1.0 | -1.0 | -1.1 | -1.1 | putative DNA repair protein (by homology)                     | YML095c                    | orf19.2469  |
| CA1341 | IPF11344     | -1.1 | -1.1 | -1.1 | -1.1 | unknown function                                              |                            | orf19.4340  |
| CA0182 | IF1          | 1.1  | -1.0 | -1.2 | -1.1 | unknown function                                              |                            | orf19.1130  |
| CA1145 | GCS1         | -1.1 | -1.0 | -1.1 | -1.1 | ADP-ribosylation factor GTPase-activating protein (ARF)       | YDL226c                    | orf19.11167 |
| CA1382 | IPF8421      | -1.0 | 1.0  | -1.1 | -1.1 | unknown function                                              |                            | orf19.928   |
| CA4347 | IPF3636      | -1.0 | -1.1 | -1.1 | -1.1 | similar to <i>Saccharomyces cerevisiae</i> Rad4p excision re  | YER162c                    | orf19.6722  |
| CA0537 | PRP16        | -1.1 | -1.1 | -1.3 | -1.1 | RNA-dependent ATPase (by homology)                            | YKR086w                    | orf19.2818  |
| CA1320 | IPF3143      | -1.0 | -1.1 | -1.1 | -1.1 | similar to <i>Saccharomyces cerevisiae</i> Orc4p subunit of o | YPR162c                    | orf19.4221  |
| CA5473 | IPF16947     | 1.0  | -1.3 | -1.4 | -1.1 | unknown function                                              | YDR221w                    | orf19.3286  |
| CA5685 | HPA1         | -1.0 | -1.0 | -1.1 | -1.1 | RNA polymerase II-associated Histone acetyltransferas         | YPL086c                    | orf19.7387  |
| CA5190 | IPF10155     | 1.0  | -1.1 | -1.0 | -1.1 | unknown function                                              | YKL059c                    | orf19.4628  |
| CA1513 | MIR1         | -1.0 | -1.0 | -1.0 | -1.1 | phosphate transport protein, mitochondrial (MCF) (by hc       | YJR077c                    | orf19.4885  |
| CA5509 | IPF743       | 1.0  | -1.0 | -1.1 | -1.1 | unknown function                                              |                            | orf19.5353  |
| CA1027 | PF19645.EXON | 1.0  | -1.1 | -1.1 | -1.1 | unknown function, exon 2                                      | YPR040w                    |             |
| CA0018 | IPF19435     | 1.0  | -1.1 | 1.0  | -1.1 | unknown function                                              | Missing in array           |             |
| CA0551 | CDC37        | -1.0 | -1.2 | -1.3 | -1.1 | Cell division control protein (by homology)                   | YDR168w                    | orf19.5531  |
| CA4409 | IPF13151     | -1.2 | -1.1 | -1.2 | -1.1 | unknown function                                              |                            | orf19.3100  |
| CA0146 | IPF9689      | -1.1 | -1.1 | -1.2 | -1.1 | unknown function                                              |                            | orf19.11132 |
| CA4247 | TAF90        | 1.1  | 1.1  | 1.1  | -1.1 | Probable transcription-associated factor protein              | YBR198c                    | orf19.536   |
| CA5512 | ORC2         | -1.1 | -1.0 | -1.0 | -1.1 | origin recognition complex subunit 2 (by homology)            | YBR060c                    | orf19.5358  |
| CA5915 | IPF10735     | 1.1  | 1.0  | 1.1  | -1.1 | similar to <i>Saccharomyces cerevisiae</i> Ngr1p negative gr  | YBR212w                    | orf19.6790  |
| CA2469 | IPF7393      | -1.0 | -1.1 | 1.0  | -1.1 | unknown function                                              |                            | orf19.9364  |
| CA3939 | HNM1         | 1.7  | -1.1 | 1.1  | -1.1 | Choline permease (by homology)                                |                            | orf19.9554  |
| CA2416 | IFD4         | 1.1  | -1.2 | -1.3 | -1.1 | Putative aryl-alcohol dehydrogenase (by homology)             |                            | orf19.4477  |
| CA5936 | IPF2795      | -1.2 | -1.2 | -1.2 | -1.1 | unknown function                                              |                            | orf19.6763  |
| CA0817 | IPF6339      | 1.1  | -1.1 | -1.1 | -1.1 | unknown function                                              |                            | orf19.10239 |
| CA1125 | RRP43        | -1.0 | -1.1 | -1.1 | -1.1 | rRNA processing protein (by homology)                         | YCR035c                    | orf19.6259  |
| CA2073 | IPF6967      | -1.0 | -1.1 | -1.1 | -1.1 | unknown function                                              |                            | orf19.10161 |
| CA1293 | HCA4         | -1.1 | -1.2 | -1.3 | -1.1 | Can suppress the U14 snoRNA rRNA processing functi            | YJL033w                    | orf19.2712  |
| CA2923 | FET32        | -1.1 | -1.1 | -1.1 | -1.1 | cell surface ferroxidase (by homology)                        |                            | orf19.11688 |
| CA5239 | GND1         | -1.1 | -1.2 | 1.1  | -1.1 | 6-phosphogluconate dehydrogenase                              | YHR183w ; Missing in array | orf19.5024  |
| CA4408 | CTA6.3       | 1.0  | 1.0  | -1.1 | -1.1 | unknown function, 3-prime end                                 |                            | orf19.3102  |
| CA3536 | IPF5414      | -1.0 | -1.0 | -1.0 | -1.1 | unknown function                                              |                            | orf19.6371  |
| CA0587 | SPO14.5EOC   | -1.1 | 1.0  | -1.5 | -1.1 | phospholipase D, 5-prime end                                  | YKR031c                    | orf19.8753  |
| CA5319 | IPF2150      | -1.2 | -1.2 | -1.3 | -1.1 | similar to protein involved in ER function                    | YKL124w                    | orf19.7193  |
| CA6061 | IPF8302      | 1.1  | -1.1 | -1.1 | -1.1 | unknown function                                              |                            | orf19.6007  |
| CA2996 | IPF9108      | 1.1  | 1.0  | 1.2  | -1.1 | similar to <i>Saccharomyces cerevisiae</i> Ace2p transcriptio | YLR131c                    | orf19.6124  |
| CA0755 | IPF14861     | -1.0 | -1.0 | -1.0 | -1.1 | unknown function                                              |                            | orf19.3487  |
| CA2384 | MDL1         | -1.1 | -1.1 | -1.1 | -1.1 | ATP-DEPENDENT PERMEASE                                        | YLR188w                    | orf19.2615  |
| CA5946 | IPF3493      | -1.0 | -1.0 | -1.0 | -1.1 | unknown function                                              | YBR061c                    | orf19.6751  |
| CA5817 | IPF2511      | 1.0  | -1.0 | -1.1 | -1.1 | unknown function                                              | YER064c                    | orf19.7468  |
| CA4305 | IPF6654      | 1.0  | -1.0 | 1.0  | -1.1 | unknown function                                              | YBL060w                    | orf19.6705  |
| CA5887 | IPF2415      | -1.0 | 1.0  | -1.1 | -1.1 | similar to <i>Saccharomyces cerevisiae</i> Apc2p component    | YLR127c                    | orf19.6821  |
| CA3348 | RIO1         | 1.1  | -1.1 | -1.1 | -1.1 | unknown function                                              | YOR119c                    | orf19.2320  |
| CA1694 | TRM3         | -1.1 | -1.2 | -1.2 | -1.1 | 2 -O-ribose methyltransferase (by homology)                   | YDL112w                    | orf19.5038  |
| CA0959 | SAM2         | 1.0  | -1.0 | -1.1 | -1.1 | S-adenosylmethionine synthetase 2                             | YDR502c                    | orf19.657   |
| CA0485 | IPF17574     | -1.1 | -1.1 | -1.2 | -1.1 | Unknown function                                              | YAR014c                    | orf19.11038 |

|        |              |      |      |      |      |                                                                     |                  |             |
|--------|--------------|------|------|------|------|---------------------------------------------------------------------|------------------|-------------|
| CA5849 | IPF404.5F    | -1.1 | -1.1 | -1.1 | -1.1 | unknown function, 5-prime end                                       |                  | orf19.7506  |
| CA1321 | IPF3141      | -1.0 | 1.0  | 1.0  | -1.1 | similar to <i>Saccharomyces cerevisiae</i> Sst2p involved in c      | YLR452c          | orf19.4222  |
| CA6042 | IPF4924      | 1.0  | 1.0  | -1.0 | -1.1 | unknown function                                                    | YNL282w          | orf19.7657  |
| CA3438 | IPF11330     | -1.2 | -1.1 | -1.2 | -1.1 | unknown function                                                    | YHR194w          | orf19.2987  |
| CA1305 | IPF13508     | -1.0 | -1.0 | -1.1 | -1.1 | unknown function                                                    | YDR063w          | orf19.4193  |
| CA5929 | GCD2         | -1.2 | -1.1 | -1.3 | -1.1 | Translation initiation factor eIF2B, 71 kDa (delta) subuni          | YGR083c          | orf19.6776  |
| CA1580 | TRP5         | -1.0 | -1.0 | -1.1 | -1.1 | tryptophan synthase (by homology)                                   | YGL026c          | orf19.4718  |
| CA4140 | IPF11959     | -1.1 | -1.2 | -1.0 | -1.1 | unknown function                                                    | YGR046w          | orf19.4232  |
| CA2979 | ADE4         | -1.3 | -1.3 | -1.2 | -1.1 | amidophosphoribosyltransferase (by homology)                        | YMR300c          | orf19.1233  |
| CA4256 | IPF4282      | -1.0 | -1.2 | -1.2 | -1.1 | unknown function                                                    | YIR015w          | orf19.544   |
| CA0035 | PRC3         | -1.1 | -1.1 | -1.0 | -1.1 | Carboxypeptidase Y precursor (by homology)                          | YBR139w          | orf19.10011 |
| CA4529 | IPF4395      | 1.3  | -1.2 | 1.1  | -1.1 | unknown function                                                    | YGL010w          | orf19.1477  |
| CA2184 | IPF6874.3    | -1.1 | -1.0 | -1.0 | -1.1 | unknown function, 3-prime end                                       |                  | orf19.4251  |
| CA1212 | IPF7033      | -1.1 | 1.0  | -1.0 | -1.1 | unknown function                                                    | YPR057w          | orf19.7777  |
| CA5673 | IPF1272      | -1.0 | -1.1 | -1.3 | -1.1 | unknown function                                                    |                  | orf19.7376  |
| CA5425 | BDF1         | -1.2 | 1.0  | -1.1 | -1.1 | sporulation protein (by homology)                                   | YLR399c          | orf19.978   |
| CA1984 | IPF9592      | -1.1 | -1.1 | -1.1 | -1.1 | unknown function                                                    | YFL042043c       | orf19.7736  |
| CA2046 | IPF8108      | -1.1 | -1.1 | -1.2 | -1.1 | unknown function                                                    | YLR074c          | orf19.10451 |
| CA2507 | PF18459.3EOC | -1.0 | -1.1 | -1.0 | -1.1 | aldehyde dehydrogenase, 3-prime end (by homology)                   | Missing in array |             |
| CA4131 | IPF6886      | 1.0  | -1.0 | -1.0 | -1.1 | unknown function                                                    | YKL090w          | orf19.11718 |
| CA0953 | PF13166.3EOC | -1.1 | -1.2 | -1.2 | -1.1 | unknown function, 3-prime end                                       |                  | orf19.1144  |
| CA5900 | IPF2379      | -1.0 | -1.1 | -1.2 | -1.1 | unknown function                                                    |                  | orf19.6806  |
| CA4330 | IPF2087      | 1.0  | -1.1 | 1.1  | -1.1 | unknown function                                                    |                  | orf19.4090  |
| CA2074 | IPF3733      | 1.0  | 1.0  | -1.0 | -1.1 | unknown function                                                    |                  | orf19.5287  |
| CA4449 | IPF3520      | -1.0 | -1.1 | -1.1 | -1.1 | unknown function                                                    | YPL030w          | orf19.6847  |
| CA4138 | IPF11954     | -1.1 | -1.1 | -1.1 | -1.1 | unknown function                                                    | YCR054c          | orf19.4234  |
| CA5325 | IPF2138      | 1.0  | -1.0 | -1.1 | -1.1 | unknown function                                                    | YBR137w          | orf19.7199  |
| CA3418 | IPF12777     | -1.0 | -1.0 | -1.1 | -1.1 | unknown function                                                    |                  | orf19.6137  |
| CA4059 | PRD1         | -1.3 | -1.2 | -1.2 | -1.1 | Proteinase (by homology)                                            | YCL057w          | orf19.8064  |
| CA5838 | IPF424       | -1.1 | -1.1 | -1.1 | -1.1 | unknown function                                                    | YGR002c          | orf19.7492  |
| CA4340 | IPF3621      | -1.1 | -1.1 | -1.2 | -1.1 | unknown function                                                    | YJR134c          | orf19.6712  |
| CA5518 | IPF721.5F    | -1.0 | -1.0 | -1.2 | -1.1 | unknown function, 5-prime end                                       | YMR259c          | orf19.5366  |
| CA3882 | IPF7279      | -1.0 | -1.1 | -1.2 | -1.1 | putative cobalamin-dependent homocysteine S-methyltr                | YPL273w          | orf19.386   |
| CA2479 | CCN1         | -1.0 | -1.1 | -1.0 | -1.1 | G1 cyclin                                                           |                  | orf19.3207  |
| CA3871 | IPF8828      | -1.0 | 1.1  | -1.1 | -1.1 | unknown function                                                    |                  | orf19.398   |
| CA2593 | RRP6         | -1.1 | -1.2 | -1.4 | -1.1 | involved in 5.8S rRNA processing (by homology)                      | YOR001w          | orf19.58    |
| CA3525 | DJP1         | 1.0  | -1.1 | -1.2 | -1.1 | DnaJ-like protein involved in peroxisome biogenesis (by             | YIR004w          | orf19.8606  |
| CA3733 | IPF11897     | 1.0  | -1.0 | -1.0 | -1.1 | unknown function                                                    |                  | orf19.11659 |
| CA4901 | IPF1457      | -1.0 | -1.2 | -1.2 | -1.1 | putative transcription activator (by homology)                      |                  | orf19.6038  |
| CA4962 | TRL1         | -1.1 | -1.1 | -1.2 | -1.1 | tRNA ligase                                                         | YJL087c          | orf19.6511  |
| CA5731 | IPF2870      | -1.0 | -1.0 | -1.0 | -1.1 | unknown function                                                    |                  | orf19.7441  |
| CA3857 | CCT8         | 1.0  | -1.1 | -1.1 | -1.1 | component of chaperonin-containing T-complex                        | YJL008c          | orf19.6099  |
| CA5872 | IPF333       | 1.1  | -1.1 | 1.0  | -1.1 | unknown function                                                    |                  | orf19.7539  |
| CA3924 | TKL1         | 1.2  | -1.2 | -1.0 | -1.1 | transketolase 1                                                     | YPR074c          | orf19.5112  |
| CA2289 | RBF1.3       | -1.1 | 1.0  | -1.1 | -1.1 | RPG-BOX-BINDING FACTOR, 3-prime end                                 |                  | orf19.13004 |
| CA0008 | IPF12110     | 1.1  | -1.3 | -1.3 | -1.1 | 1,4-butanediol diacrylate esterase (by homology)                    |                  | orf19.376   |
| CA2689 | IFU2         | -1.1 | -1.0 | -1.2 | -1.1 | Unknown function                                                    | YPL009c          | orf19.2582  |
| CA0724 | IPF13398     | -1.2 | -1.2 | -1.2 | -1.1 | protein kinase (by homology)                                        |                  | orf19.7708  |
| CA3354 | IPF11281     | -1.0 | -1.1 | -1.0 | -1.1 | similar to <i>Saccharomyces cerevisiae</i> Gpr1p G-protein $\alpha$ | YDL035c          | orf19.9499  |



|        |              |      |      |      |      |                                                                |         |             |
|--------|--------------|------|------|------|------|----------------------------------------------------------------|---------|-------------|
| CA4806 | IPF1155      | -1.2 | -1.0 | -1.1 | -1.1 | Putative dipeptidase (by homology)                             | YLL029w | orf19.2095  |
| CA0555 | HYS2         | -1.0 | -1.1 | -1.0 | -1.1 | DNA-directed DNA polymerase delta (by homology)                | YJR006w | orf19.3960  |
| CA5471 | IPF302       | -1.1 | -1.1 | -1.1 | -1.1 | short chain dehydrogenase/reductase (by homology)              | YKL055c | orf19.3283  |
| CA3092 | IPF9821.3F   | 1.0  | -1.1 | -1.1 | -1.1 | unknown function, 3-prime end                                  | YEL064c | orf19.11617 |
| CA3535 | IPF13458     | -1.1 | -1.1 | -1.1 | -1.1 | unknown function                                               | YNL207w | orf19.6369  |
| CA4746 | IPF4485      | -1.0 | -1.2 | -1.2 | -1.1 | unknown function                                               | YER082c | orf19.4835  |
| CA0670 | IPF5915      | -1.2 | 1.1  | -1.1 | -1.1 | phosphatidyl synthase (by homology)                            | YKR070w | orf19.449   |
| CA0632 | RPS5         | 1.2  | -1.2 | -1.2 | -1.1 | ribosomal protein S5.e (by homology)                           | YJR123w | orf19.11812 |
| CA1735 | IPF4986      | -1.1 | -1.1 | -1.1 | -1.1 | similar to <i>Saccharomyces cerevisiae</i> Tfc5p TFIIB subunit | YNL039w | orf19.2528  |
| CA4173 | FRS2         | -1.1 | -1.1 | -1.0 | -1.1 | phenylalanine--tRNA ligase beta chain, cyto:                   | YFL022c | orf19.2960  |
| CA5372 | MLH3         | 1.0  | -1.0 | -1.0 | -1.1 | DNA mismatch repair by homology                                | YPL164c | orf19.7257  |
| CA2488 | IPF17706     | -1.1 | -1.1 | -1.1 | -1.1 | Unknown function                                               |         | orf19.10708 |
| CA4003 | IPF4257      | -1.1 | -1.1 | -1.2 | -1.1 | unknown function                                               | YDR324c | orf19.1633  |
| CA4941 | CRN1.53F     | 1.0  | -1.1 | -1.2 | -1.1 | actin-binding protein, 5-prime end (by homology)               | YLR429w |             |
| CA4661 | IPF6561      | -1.1 | -1.1 | -1.0 | -1.1 | unknown function                                               | YOR353c | orf19.4448  |
| CA5051 | IPF3709      | -1.1 | -1.0 | -1.1 | -1.1 | unknown function                                               | YDR101c | orf19.3015  |
| CA0294 | IPF16061     | -1.0 | -1.1 | -1.0 | -1.1 | unknown function                                               | YOR243c | orf19.9322  |
| CA3262 | UBR11.3      | -1.1 | 1.0  | -1.1 | -1.1 | ubiquitin-protein ligase, 3-prime end (by homology)            | YGR184c | orf19.2695  |
| CA1281 | ³F10171.EXON | 1.1  | -1.1 | -1.1 | -1.1 | unknown function, exon 3                                       |         | orf19.645   |
| CA4089 | IPF5009      | -1.1 | -1.1 | -1.1 | -1.1 | unknown function                                               | YGR245c | orf19.6648  |
| CA5659 | SEN54        | 1.0  | -1.0 | -1.1 | -1.1 | tRNA splicing endonuclease alpha subunit(by homology)          | YPL083c | orf19.7361  |
| CA5204 | YML6         | -1.0 | -1.2 | -1.1 | -1.1 | Ribosomal protein, mitochondrial (by homology)                 | YML025c | orf19.7019  |
| CA5618 | LEU2         | -1.2 | -1.2 | -1.3 | -1.1 | isopropyl malate dehydrogenase                                 | YCL018w | orf19.7080  |
| CA3462 | IPF14959     | -1.2 | -1.1 | -1.3 | -1.1 | similar to <i>Saccharomyces cerevisiae</i> Trs130p TRAPP s     | YMR218c | orf19.1265  |
| CA5403 | IPF1542      | -1.1 | -1.0 | -1.1 | -1.1 | unknown function                                               | YKL002w | orf19.945   |
| CA0658 | IPF16505     | 1.1  | -1.1 | -1.1 | -1.1 | Unknown function                                               | YPL112c | orf19.5575  |
| CA0712 | IPF13717     | 1.0  | -1.1 | -1.2 | -1.1 | unknown function                                               | YKL082c | orf19.2167  |
| CA5200 | RPL10E       | -1.2 | -1.1 | -1.1 | -1.1 | Ribosomal protein L10, cytosolic (by homology)                 | YLR340w | orf19.7015  |
| CA0854 | IPF8854      | -1.3 | -1.2 | -1.3 | -1.1 | similar to <i>Saccharomyces cerevisiae</i> Mnn1p alpha-1,3-r   | YER001w | orf19.4900  |
| CA2541 | IPF9191.3F   | -1.2 | -1.0 | -1.1 | -1.1 | unknown function, 3-prime end                                  |         | orf19.3188  |
| CA5787 | IPF1136      | -1.1 | -1.2 | -1.2 | -1.1 | unknown function                                               | YGR128c | orf19.5436  |
| CA3912 | IPF3288      | 1.0  | -1.0 | -1.0 | -1.1 | unknown function                                               |         | orf19.4390  |
| CA4546 | SPT5         | 1.1  | 1.0  | -1.0 | -1.1 | Transcription elongation protein                               | YML010w | orf19.1453  |
| CA5775 | ATP5         | 1.0  | -1.2 | -1.3 | -1.1 | F1F0-ATPase complex, OSCP subunit (by homology)                | YDR298c | orf19.5419  |
| CA5557 | IPF1968      | -1.2 | -1.1 | -1.2 | -1.1 | unknown function                                               | YMR029c | orf19.7321  |
| CA0453 | IPF13552     | -1.1 | -1.1 | -1.1 | -1.1 | putative methyltransferase (by homology)                       | YDR316w | orf19.8880  |
| CA4075 | IPF2555      | 1.0  | -1.1 | -1.1 | -1.1 | unknown function                                               |         | orf19.6628  |
| CA6088 | HPR5         | -1.2 | -1.1 | -1.2 | -1.1 | ATP-dependent DNA Helicase (by homology)                       | YJL092w | orf19.5970  |
| CA0939 | DBP6         | -1.0 | -1.1 | -1.2 | -1.1 | RNA helicase required for 60S ribosomal subunit assem          | YNR038w | orf19.3704  |
| CA3678 | IPF8392      | -1.1 | -1.2 | -1.4 | -1.1 | unknown function                                               | YLR080w | orf19.731   |
| CA6038 | LTV1         | 1.0  | -1.1 | -1.1 | -1.1 | low-temperature viability protein (by homology)                | YKL143w | orf19.7650  |
| CA4150 | RPT3         | -1.3 | -1.0 | -1.0 | -1.1 | 26S proteasome regulatory subunit                              | YDR394w | orf19.5793  |
| CA4119 | BEM3         | -1.0 | -1.1 | -1.0 | -1.1 | GTPase-activating protein for Cdc42p and Rho1p (by h           | YPL115c | orf19.2771  |
| CA1491 | IPF166       | -1.0 | -1.1 | -1.1 | -1.1 | unknown function                                               | YCR017c | orf19.3225  |
| CA0653 | MET6         | 1.1  | -1.3 | -1.3 | -1.1 | BY HOMOLOGY TO <i>S.CEREV.</i> : 5-methyltetrahydropter        | YER091c | orf19.10083 |
| CA0052 | IPF19567     | 1.0  | -1.2 | -1.1 | -1.1 | Unknown function                                               | YHR085w | orf19.379   |
| CA1176 | CHS5         | -1.0 | -1.1 | -1.3 | -1.1 | Chitin biosynthesis protein                                    | YLR330w | orf19.807   |
| CA4498 | IPF11315     | -1.1 | -1.1 | -1.3 | -1.1 | unknown function                                               | YNL132w | orf19.8143  |
| CA3996 | IPF10440     | -1.0 | -1.2 | 1.1  | -1.1 | unknown function                                               | YGR101w | orf19.1643  |

|        |              |      |      |      |      |                                                           |                  |             |
|--------|--------------|------|------|------|------|-----------------------------------------------------------|------------------|-------------|
| CA2126 | IPF4896      | 1.0  | -1.0 | -1.1 | -1.1 | unknown function                                          | YGR257c          | orf19.417   |
| CA5798 | IPF4181      | 1.1  | -1.1 | -1.4 | -1.1 | putative permease (by homology)                           |                  | orf19.5447  |
| CA5738 | LYS9         | -1.0 | -1.5 | -1.3 | -1.1 | Lysine biosynthesis (by homology)                         | YNR050c          | orf19.7448  |
| CA3626 | CYR1.5F      | -1.1 | 1.1  | -1.5 | -1.1 | adenylate cyclase, 5-prime end                            |                  | orf19.12615 |
| CA1796 | IPF11259     | -1.0 | -1.0 | 1.0  | -1.1 | unknown function                                          | YIL101c          | orf19.5210  |
| CA1037 | MNS1         | -1.1 | -1.1 | 1.0  | -1.1 | Alpha1,2-mannosidase (by homology)                        | YJR131w          | orf19.8638  |
| CA0241 | IPF15630     | -1.1 | -1.1 | -1.2 | -1.1 | unknown function                                          | YPL207w          | orf19.3470  |
| CA2300 | PMA1         | 1.6  | 1.4  | 1.2  | -1.1 | plasma membrane H <sup>+</sup> -transporting ATPase 1     | YGL008c          | orf19.5383  |
| CA5416 | IPF1576      | -1.0 | -1.0 | -1.0 | -1.1 | unknown function                                          | YLR405w          | orf19.966   |
| CA5098 | IPF1380      | 1.1  | -1.0 | -1.1 | -1.1 | delta3-cis-delta2-trans-enoyl-CoA isomerase (by homology) |                  | orf19.6443  |
| CA2911 | MET7         | -1.1 | -1.1 | -1.1 | -1.1 | folypolyglutamate synthetase [Candida albicans]           | YOR241w          | orf19.4516  |
| CA2515 | IPF19759     | 1.0  | -1.1 | -1.1 | -1.1 | Unknown Function                                          | YGL133w          | orf19.5510  |
| CA0229 | IPF8147      | -1.0 | -1.1 | -1.0 | -1.1 | unknown function                                          |                  | orf19.13580 |
| CA0299 | IPF3765      | -1.1 | -1.3 | -1.1 | -1.1 | unknown function                                          | YGR106c          | orf19.1597  |
| CA5227 | IPF3087      | 1.1  | -1.3 | -1.2 | -1.1 | unknown function                                          | YIR017c          | orf19.7046  |
| CA1697 | IPF16758     | -1.1 | -1.2 | -1.2 | -1.1 | unknown function                                          |                  | orf19.5043  |
| CA1712 | ABC1         | -1.1 | 1.0  | 1.1  | -1.1 | ubiquinol--cytochrome-c reductase(by homology)            | YGL119w          | orf19.10842 |
| CA3822 | CUS2         | -1.0 | -1.0 | -1.1 | -1.1 | cold sensitive U2 snRNA Suppressor(by homology)           | YNL286w          | orf19.5767  |
| CA0260 | IPF13683     | 1.1  | -1.2 | -1.2 | -1.1 | unknown function                                          |                  | orf19.2547  |
| CA3953 | IPF6714      | 1.0  | -1.0 | -1.0 | -1.1 |                                                           |                  | orf19.1412  |
| CA3451 | IPF7316      | -1.0 | -1.1 | -1.1 | -1.1 | unknown function                                          |                  | orf19.10488 |
| CA1182 | IPF19724     | -1.1 | -1.1 | -1.1 | -1.1 | similar to Saccharomyces cerevisiae Tbf1ptelomere rep     | YPL128c          | orf19.801   |
| CA1471 | ALS2.3FEOC   | 1.0  | 1.0  | 1.0  | -1.1 | agglutinin-like protein, 3-prime end                      | Missing in array | orf19.1098  |
| CA0184 | IPF19142     | -1.3 | -1.3 | -1.4 | -1.1 | unknown function                                          |                  | orf19.11467 |
| CA3508 | RSA2         | -1.1 | -1.1 | -1.2 | -1.1 | Involved in ribosome biogenesis (by homology)             | YMR131c          | orf19.6355  |
| CA6109 | IPF89.3      | 1.1  | -1.1 | -1.3 | -1.1 | unknown function, 3-prime end                             | YLR150w          |             |
| CA0174 | PF11182.3EOC | -1.2 | -1.0 | -1.3 | -1.1 | unknown function, 3-prime end                             | YLR106c          |             |
| CA2273 | BIO2         | -1.1 | -1.1 | -1.1 | -1.1 | biotin synthetase (by homology)                           | YGR286c          | orf19.2593  |
| CA5956 | VAN1         | -1.2 | -1.1 | -1.1 | -1.1 | Vanadate resistance protein                               | YML115c          | orf19.6738  |
| CA1955 | IPF3897.3F   | -1.1 | -1.1 | -1.2 | -1.1 | unknown function, 3-prime end                             |                  | orf19.765   |
| CA0693 | PF12606.5EOC | -1.1 | -1.1 | -1.2 | -1.1 | unknown function, 5-prime end                             | YNL123w          | orf19.3288  |
| CA0272 | DPB11        | -1.1 | -1.3 | -1.4 | -1.1 | DNA polymerase II complex (by homology)                   | YJL090c          | orf19.1434  |
| CA5863 | IPF370       | -1.0 | -1.1 | -1.0 | -1.1 | unknown function                                          |                  | orf19.7521  |
| CA4914 | IPF1428      | -1.1 | -1.2 | -1.1 | -1.1 | Similar to ubiquitination protein Bul1p (by homology)     |                  | orf19.6054  |
| CA0089 | MRPL3        | -1.0 | -1.2 | -1.0 | -1.1 | ribosomal protein of the large subunit, mitochondrial (by | YMR024w          | orf19.5064  |
| CA3722 | PHO13        | 1.0  | -1.1 | -1.0 | -1.1 | 4-nitrophenylphosphatase (by homology)                    |                  | orf19.4172  |
| CA3716 | IPF6203      | -1.1 | -1.1 | 1.0  | -1.1 | unknown function                                          |                  | orf19.11642 |
| CA0027 | RCL1         | -1.1 | -1.1 | -1.1 | -1.1 | RNA 3'-terminal phosphate cyclase (by homology)           | YOL010w          | orf19.1886  |
| CA5756 | IPF1065      | 1.0  | -1.0 | -1.0 | -1.1 | unknown function                                          |                  | orf19.5392  |
| CA1623 | STE7         | -1.0 | -1.0 | -1.0 | -1.1 | MAP Kinase Kinase                                         | YDL159w          | orf19.469   |
| CA4348 | IPF3638      | -1.1 | -1.2 | -1.3 | -1.1 | unknown function                                          |                  | orf19.6723  |
| CA5475 | IPF8532      | -1.0 | -1.0 | -1.1 | -1.1 | unknown function                                          | Missing in array | orf19.5303  |
| CA0393 | IPF12758.3F  | 1.1  | -1.1 | 1.0  | -1.1 | unknown function, 3-prime end                             |                  |             |
| CA4523 | GCD1         | -1.2 | -1.2 | -1.3 | -1.1 | translation initiation factor eIF2bgamma (by homology)    | YOR260w          | orf19.481   |
| CA0715 | DBP9         | -1.1 | -1.2 | -1.2 | -1.1 | dead box helicase                                         | YLR276c          | orf19.3393  |
| CA1452 | REV1         | -1.1 | 1.0  | -1.1 | -1.1 | DNA repair protein (by homology)                          | YOR346w          | orf19.4412  |
| CA0443 | SPB1         | 1.1  | -1.2 | -1.2 | -1.1 | Putative methyltransferase by homology                    | YCL054w          | orf19.7727  |
| CA2990 | IPF5092      | -1.1 | -1.1 | -1.2 | -1.1 | unknown function                                          | YOR296w          | orf19.6012  |
| CA5377 | IPF5234      | -1.0 | -1.0 | -1.0 | -1.1 | X-Pro dipeptidase (by homology)                           | YFR006w          | orf19.7263  |

|        |             |      |      |      |      |                                                                       |         |             |
|--------|-------------|------|------|------|------|-----------------------------------------------------------------------|---------|-------------|
| CA0672 | GRP6        | -1.1 | -1.1 | -1.1 | -1.1 | Putative reductase (by homology)                                      |         | orf19.3151  |
| CA2313 | ERF3        | -1.0 | -1.0 | -1.1 | -1.1 | translation release factor 3                                          | YDR172w | orf19.1378  |
| CA2627 | IPF10916    | 1.1  | -1.0 | 1.0  | -1.1 | unknown function                                                      | YAL008w | orf19.4763  |
| CA1175 | ARG81       | -1.1 | -1.1 | -1.2 | -1.1 | transcription factor possibly involved in arginine metabo             | YML099c | orf19.4766  |
| CA0528 | ANP1        | -1.2 | -1.1 | -1.4 | -1.1 | Golgi mannosyltransferase (by homology)                               | YEL036c | orf19.3622  |
| CA5291 | LOS1        | -1.4 | -1.3 | -1.3 | -1.1 | pre-tRNA splicing protein (by homology)                               | YKL205w | orf19.7153  |
| CA1560 | MET18       | -1.0 | -1.2 | -1.2 | -1.1 | Involved in NER repair and RNA polymerase II transcrip                | YIL128w | orf19.1706  |
| CA1095 | SMC1        | -1.2 | -1.1 | -1.3 | -1.1 | Chromosomal ATPase family member (by homology)                        | YFL008w | orf19.4367  |
| CA1921 | IPF7475     | 1.2  | -1.0 | 1.2  | -1.1 | similar to <i>Saccharomyces cerevisiae</i> Chs7p involved in          | YHR142w | orf19.2444  |
| CA2733 | PRP18       | -1.0 | -1.1 | -1.2 | -1.1 | U5 snRNA-associated protein (by homology)                             | YGR006w | orf19.2112  |
| CA5412 | IPF1566     | -1.1 | -1.1 | -1.1 | -1.1 | unknown function                                                      | YLR087c | orf19.956   |
| CA3419 | IPF12778    | 1.1  | -1.3 | -1.3 | -1.1 | ribosomal protein, mitochondrial (by homology)                        | YLR439w | orf19.6136  |
| CA4389 | RPT5        | -1.0 | -1.0 | -1.1 | -1.1 | 26S proteasome regulatory subunit (by homology)                       | YOR117w | orf19.3123  |
| CA0211 | IPF4326     | 1.0  | 1.0  | 1.0  | -1.1 | unknown function                                                      |         | orf19.12970 |
| CA5033 | DNM1        | -1.3 | -1.2 | -1.4 | -1.1 | Dynamamin-related protein (by homology)                               | YLL001w | orf19.6987  |
| CA0979 | IPF19713    | -1.1 | -1.3 | -1.3 | -1.1 | unknown function                                                      |         | orf19.3601  |
| CA0318 | FOL2        | -1.0 | -1.0 | -1.1 | -1.1 | GTP cyclohydrolase (by homology)                                      | YGR267c | orf19.3957  |
| CA0416 | IPF17492    | 1.0  | -1.1 | -1.1 | -1.1 | unknown function                                                      |         | orf19.1225  |
| CA4718 | IPF8661     | -1.0 | -1.2 | -1.3 | -1.1 | unknown function                                                      | YOR056c | orf19.6955  |
| CA0878 | CNH1.3F     | -1.0 | 1.2  | -1.2 | -1.1 | Na <sup>+</sup> /H <sup>+</sup> antiporter, 3-prime end (by homology) |         | orf19.8001  |
| CA2194 | RGR1        | -1.3 | -1.1 | -1.3 | -1.1 | DNA-directed RNA polymerase II (by homology)                          | YLR071c | orf19.11825 |
| CA3495 | RIB7        | -1.4 | -1.1 | -1.3 | -1.1 | HTP reductase (By homology)                                           | YBR153w | orf19.6341  |
| CA4176 | F4425.REPEA | -1.1 | -1.1 | -1.1 | -1.1 | unknown function                                                      |         | orf19.2957  |
| CA4467 | IPF9833     | -1.1 | -1.1 | -1.1 | -1.1 | unknown function                                                      |         | orf19.6864  |
| CA4237 | IPF6375     | -1.1 | -1.2 | -1.1 | -1.1 | unknown function                                                      |         | orf19.520   |
| CA3131 | IPF8910     | 1.1  | -1.0 | -1.1 | -1.1 | unknown function                                                      | YNR015w | orf19.1362  |
| CA1498 | IPF12371    | 1.1  | 1.0  | 1.0  | -1.1 | extracellular alpha-1,4-glucan glucosidase (by homology)              |         | orf19.3643  |
| CA0488 | SEC59       | -1.1 | -1.1 | 1.0  | -1.1 | Dolichol kinase (by homology)                                         | YMR013c | orf19.261   |
| CA2110 | IPF13749.3F | -1.2 | -1.3 | -1.3 | -1.1 | unknown function, 3-prime end                                         |         | orf19.3689  |
| CA1671 | IPF11391    | -1.0 | -1.1 | -1.2 | -1.1 | unknown function                                                      |         |             |
| CA4373 | IPF5287     | -1.1 | -1.1 | -1.1 | -1.1 | signal transduction protein (by homology)                             | YMR032w | orf19.5664  |
| CA1140 | IPF17322.3F | -1.1 | -1.1 | -1.3 | -1.1 | unknown function, 3-prime end                                         |         | orf19.4068  |
| CA2959 | IPF8591     | 1.0  | -1.0 | -1.0 | -1.1 | putative arginase family member (by homolgy)                          |         | orf19.5862  |
| CA5516 | IPF726      | 1.1  | 1.0  | -1.1 | -1.1 | rna binding protein (by homology)                                     | YBR065c | orf19.5364  |
| CA3562 | IPF7823     | -1.2 | -1.2 | -1.3 | -1.1 | similar to <i>Saccharomyces cerevisiae</i> Rvb1p RuvB-like p          | YDR190c | orf19.3129  |
| CA3256 | IPF4730     | -1.0 | -1.0 | -1.1 | -1.1 | unknown Function                                                      | YOR112w | orf19.11229 |
| CA4468 | TOR2.53EOC  | 1.1  | 1.3  | -1.2 | -1.1 | phosphatidylinositol 3-kinase, internal fragment (by homology)        |         | orf19.1905  |
| CA1442 | ERG20       | -1.0 | -1.1 | -1.2 | -1.1 | farnesyl-pyrophosphate synthetase                                     | YJL167w | orf19.4491  |
| CA2356 | IPF12282    | -1.2 | -1.1 | -1.3 | -1.1 | unknown function                                                      |         | orf19.4893  |
| CA4793 | IPF3375     | -1.0 | -1.0 | -1.1 | -1.1 | similar to <i>Saccharomyces cerevisiae</i> Rer2p cis-prenyltr         | YBR002c | orf19.4028  |
| CA0924 | IFD5        | -1.1 | -1.1 | -1.2 | -1.1 | Putative aryl-alcohol dehydrogenase (by homology)                     |         | orf19.1048  |
| CA0154 | CPH1        | 1.0  | 1.1  | -1.1 | -1.1 | Transcription factor                                                  | YHR084w | orf19.4433  |
| CA0378 | IPF3178     | -1.1 | -1.2 | -1.3 | -1.1 | Unknown function                                                      | YFL023w | orf19.3170  |
| CA4595 | GCN2        | -1.2 | -1.1 | -1.1 | -1.1 | Ser/thr protein kinase (by homology)                                  | YDR283c | orf19.6913  |
| CA2326 | NUBM        | -1.3 | -1.2 | -1.1 | -1.1 | nucleotide-binding respiratory complex I subunit (by homology)        |         | orf19.11971 |
| CA5273 | NUP49       | -1.1 | -1.1 | -1.2 | -1.1 | nuclear pore protein (by homology)                                    | YGL172w | orf19.4987  |
| CA1077 | IPF13694    | -1.3 | -1.2 | -1.4 | -1.1 | unknown function                                                      |         | orf19.2238  |
| CA5556 | LIP7        | -1.1 | -1.2 | -1.1 | -1.1 | Secretory lipase                                                      |         | orf19.7320  |
| CA1303 | TFB4        | -1.1 | -1.1 | -1.1 | -1.1 | component of RNA polymerase transcription initiation TI               | YPR056w | orf19.4194  |

|        |              |      |      |      |      |                                                                                   |         |             |
|--------|--------------|------|------|------|------|-----------------------------------------------------------------------------------|---------|-------------|
| CA4196 | DST1         | 1.0  | -1.0 | -1.0 | -1.1 | RNA polymerase II elongation factor (by homology)                                 | YGL043w | orf19.4537  |
| CA0933 | ATM1         | -1.1 | -1.0 | -1.2 | -1.1 | ATP-binding cassette transporter (by homology)                                    | YMR301c | orf19.8678  |
| CA2573 | SUI2         | 1.1  | -1.1 | -1.2 | -1.1 | translation initiation factor eIF2, alpha chain (by homology)                     | YJR007w | orf19.6213  |
| CA1770 | IPF12457     | 1.1  | -1.2 | 1.0  | -1.1 | unknown function                                                                  | YGL111w | orf19.2185  |
| CA2773 | MGM1         | -1.1 | -1.2 | -1.1 | -1.1 | GTPase                                                                            | YOR211c | orf19.2690  |
| CA2436 | IPF5500      | -1.1 | -1.1 | -1.1 | -1.1 | unknown function                                                                  | YKR044w | orf19.2200  |
| CA0173 | IPF6913      | 1.0  | -1.1 | -1.1 | -1.1 | unknown function                                                                  |         | orf19.11273 |
| CA1840 | IFP3         | -1.1 | -1.1 | -1.1 | -1.1 | Unknown Function                                                                  |         | orf19.4707  |
| CA4323 | IPF2096      | -1.1 | -1.1 | -1.2 | -1.1 | putative acyltransferase (by homology)                                            | YPR140w | orf19.4096  |
| CA1784 | ARO7         | -1.0 | -1.2 | -1.1 | -1.1 | chorismate mutase (by homology)                                                   | YPR060c | orf19.1170  |
| CA1839 | IPF4435      | -1.2 | -1.2 | -1.1 | -1.1 | unknown function                                                                  | YGR196c | orf19.4711  |
| CA4679 | IPF3674      | -1.1 | -1.1 | -1.2 | -1.1 | unknown function                                                                  |         | orf19.893   |
| CA5723 | APN1         | -1.1 | -1.1 | -1.2 | -1.1 | AP endonuclease, exonuclease III homologue (by homology)                          | YKL114c | orf19.7428  |
| CA5357 | RSC8         | -1.0 | -1.2 | -1.2 | -1.1 | chromatin remodeling complex subunit (by homology)                                | YFR037c | orf19.7234  |
| CA5800 | IPF4175      | 1.1  | -1.2 | -1.1 | -1.1 | mitochondrial respiratory function (by homology)                                  | YBR026c | orf19.5450  |
| CA5744 | IPF2898      | -1.0 | -1.1 | -1.1 | -1.1 | unknown function                                                                  |         | orf19.7453  |
| CA0355 | IPF2535      | -1.2 | 1.0  | -1.3 | -1.1 | unknown function                                                                  |         | orf19.13951 |
| CA6134 | MAK21        | -1.1 | -1.2 | -1.2 | -1.1 | Ribosome biogenesis protein (by homology)                                         | YDR060w | orf19.5912  |
| CA2032 | IPF13112     | -1.1 | -1.1 | -1.2 | -1.1 | unknown function                                                                  |         | orf19.3466  |
| CA0702 | IPF11812     | -1.1 | -1.2 | -1.3 | -1.1 | unknown function                                                                  | YER008c | orf19.10430 |
| CA4971 | IPF4697      | -1.0 | 1.1  | -1.6 | -1.1 | similar to <i>Saccharomyces cerevisiae</i> Scp160p required for cell cycle        | YJL080c | orf19.5281  |
| CA1384 | IPF8423      | -1.0 | -1.1 | -1.3 | -1.1 | similar to <i>Saccharomyces cerevisiae</i> Dhs1p exonuclease                      | YOR033c | orf19.926   |
| CA4413 | MSH2         | -1.0 | 1.0  | -1.1 | -1.1 | DNA mismatch repair protein (by homology)                                         | YOL090w | orf19.3093  |
| CA3663 | IPF11432     | -1.0 | -1.1 | -1.1 | -1.1 | unknown function                                                                  | YJR072c | orf19.6463  |
| CA2748 | IPF11466     | -1.0 | -1.0 | -1.1 | -1.1 | unknown function                                                                  | YHR156c | orf19.2368  |
| CA4463 | PIS1         | 1.2  | -1.1 | -1.0 | -1.1 | CDP diacylglycerol--inositol 3-phosphatidyltransferase                            | YPR113w | orf19.6860  |
| CA1655 | CCC2         | -1.1 | -1.2 | -1.2 | -1.1 | putative copper-transporting ATPase (by homology)                                 | YDR270w | orf19.4328  |
| CA3274 | IPF12227.3F  | -1.3 | -1.2 | -1.3 | -1.1 | unknown function, 3-prime end                                                     |         | orf19.6308  |
| CA5397 | IPF9663      | -1.2 | -1.0 | -1.2 | -1.1 | similar to <i>Saccharomyces cerevisiae</i> Bud2p GTPase-activator                 | YKL092c | orf19.940   |
| CA0501 | IPF16501     | -1.0 | -1.0 | 1.1  | -1.1 | unknown function                                                                  |         | orf19.12259 |
| CA4364 | PF5268.EXON2 | 1.0  | 1.0  | 1.0  | -1.1 | choline monoxygenase, exon 2 (by homology)                                        |         | orf19.5655  |
| CA4072 | IPF2560      | 1.0  | -1.1 | -1.1 | -1.1 | unknown function                                                                  | YNL246w | orf19.6625  |
| CA3933 | IPF18281     | -1.0 | -1.2 | -1.3 | -1.1 | similar to <i>Saccharomyces cerevisiae</i> Pex12p peroxisomal protein             | YMR026c | orf19.9560  |
| CA2012 | SEC10        | -1.1 | -1.1 | -1.0 | -1.1 | Required for exocytosis (by homology)                                             | YLR166c | orf19.3086  |
| CA2243 | IPF7414      | -1.0 | -1.4 | -1.4 | -1.1 | putative transcription factor (by homology)                                       |         | orf19.4670  |
| CA3832 | IPF8193      | -1.1 | -1.1 | -1.1 | -1.1 | unknown function                                                                  | YLR151c | orf19.6591  |
| CA0885 | IPF12381     | 1.2  | -1.3 | -1.2 | -1.1 | unknown function                                                                  | YIR001c | orf19.1389  |
| CA2298 | IPF8224      | -1.0 | -1.1 | -1.1 | -1.1 | unknown function                                                                  |         | orf19.5380  |
| CA2176 | CDC54        | -1.1 | -1.0 | -1.1 | -1.1 | cell division control protein (by homology)                                       | YPR019w | orf19.11245 |
| CA1987 | IPF14895     | 1.3  | -1.1 | -1.2 | -1.1 | unknown function                                                                  | YMR002w | orf19.7739  |
| CA1198 | IPF10399     | 1.1  | -1.2 | -1.1 | -1.1 | unknown function                                                                  | YNL177c | orf19.10875 |
| CA4447 | IPF3523      | -1.0 | -1.1 | -1.1 | -1.1 | unknown function                                                                  |         | orf19.6845  |
| CA4613 | IPF7950      | 1.0  | -1.1 | -1.1 | -1.1 | similar to <i>Saccharomyces cerevisiae</i> Rrp40p involved in ribosome biogenesis | YOL142w | orf19.3304  |
| CA0554 | HAS1         | -1.2 | -1.0 | -1.1 | -1.1 | ATP-DEPENDENT RNA HELICASE (by homology)                                          | YMR290c | orf19.11444 |
| CA4382 | IPF8576      | -1.1 | -1.1 | -1.1 | -1.1 | similar to <i>Saccharomyces cerevisiae</i> Ris1p DNA helicase                     | YOR191w | orf19.5675  |
| CA4496 | IPF4062      | -1.4 | -1.1 | -1.2 | -1.1 | unknown function                                                                  | YDR333c | orf19.9420  |
| CA1918 | IPF7479.5F   | -1.1 | -1.1 | -1.2 | -1.1 | unknown function, 5-prime end                                                     |         | orf19.2441  |
| 1615.2 |              | 1.0  | -1.0 | -1.1 | -1.1 |                                                                                   |         |             |
| CA0787 | IPF7472      | -1.2 | -1.4 | -1.2 | -1.1 | unknown function                                                                  | YJL100w | orf19.2447  |

|         |              |      |      |      |      |                                                                          |         |             |
|---------|--------------|------|------|------|------|--------------------------------------------------------------------------|---------|-------------|
| CA2331  | MOT1         | -1.1 | 1.1  | -1.3 | -1.1 | transcriptional accessory protein                                        | YPL082c | orf19.4502  |
| CA2481  | MRPL36       | -1.0 | -1.2 | -1.2 | -1.1 | ribosomal protein YmL36 precursor, mitochondrial (by homology)           |         | orf19.3205  |
| CA1548  | IPF8746      | -1.1 | -1.1 | -1.3 | -1.1 | putative alpha-1,3-mannosyltransferase (by homology)                     |         | orf19.4279  |
| CA1201  | IPF19906     | -1.1 | -1.1 | -1.1 | -1.1 | unknown function                                                         |         | orf19.4869  |
| CA1917  | IPF7479.3F   | -1.2 | -1.2 | -1.3 | -1.1 | unknown function, 3-prime end                                            |         | orf19.2440  |
| CA4418  | ERG5         | 1.1  | -1.3 | -1.2 | -1.1 | C-22 sterol desaturase by homology                                       | YMR015c | orf19.5178  |
| CA4717  | IPF8663      | -1.1 | -1.1 | -1.3 | -1.1 | Unknown function                                                         | YJL083w | orf19.6953  |
| CA4469  | TOR2.3F      | 1.1  | 1.1  | -1.2 | -1.1 | phosphatidylinositol 3-kinase, 3-prime end (by homology)                 | YKL203c | orf19.1903  |
| CA5934  | IPF2802      | -1.1 | -1.2 | -1.2 | -1.1 | unknown function                                                         | YHL029c | orf19.6769  |
| CA4769  | IPF9384      | -1.1 | -1.1 | -1.1 | -1.1 | similar to <i>Saccharomyces cerevisiae</i> Mss2p serine/threonine kinase | YDL107w | orf19.4001  |
| 19812.1 |              | 1.1  | -1.3 | -1.4 | -1.1 |                                                                          |         |             |
| CA3537  | PSU1         | -1.1 | -1.1 | -1.3 | -1.1 | suppressor of petit mutations by homology                                | YNL118c | orf19.6373  |
| CA3407  | IPF9406      | -1.1 | -1.1 | -1.1 | -1.1 | unknown function                                                         |         | orf19.13571 |
| CA1792  | IPF13966     | -1.1 | -1.2 | -1.1 | -1.1 | unknown function                                                         | YIL104c | orf19.5206  |
| CA3234  | MAS2         | -1.1 | -1.0 | -1.1 | -1.1 | processing peptidase, catalytic 53kDa (alpha) subunit, r                 | YHR024c | orf19.6295  |
| CA1524  | SUR1         | 1.0  | -1.0 | -1.0 | -1.1 | Suppressor of ROK1                                                       | YJL056c | orf19.3794  |
| CA4027  | IPF7174      | -1.1 | -1.1 | -1.0 | -1.1 | unknown function                                                         |         | orf19.3436  |
| CA3190  | IPF11603     | -1.2 | -1.0 | -1.1 | -1.1 | unknown function                                                         | YPR004c | orf19.2150  |
| CA2699  | RLF2         | 1.0  | -1.0 | -1.0 | -1.1 | chromatin assembly complex, subunit p90 (by homology)                    | YPR018w | orf19.10253 |
| CA3893  | FUN11        | -1.3 | -1.1 | -1.2 | -1.1 | putative GTP-binding protein (by homology)                               | YAL036c | orf19.5083  |
| CA0120  | IPF19593     | -1.1 | -1.2 | -1.2 | -1.1 | similar to <i>Saccharomyces cerevisiae</i> Ulp1p Smt3-protease           | YPL020c |             |
| CA5050  | BMH2         | -1.3 | -1.1 | -1.1 | -1.1 | similar to <i>Saccharomyces cerevisiae</i> Bmh2p suppressor              | YDR099w | orf19.3014  |
| CA1666  | SRP40        | -1.2 | -1.3 | -1.2 | -1.1 | RNA I and II supressor (by homology)                                     | YKR092c | orf19.2859  |
| CA5606  | STL2.3F      | 1.0  | -1.1 | -1.2 | -1.1 | sugar transporter, 3-prime end (by homology)                             |         |             |
| CA2238  | IPF10032.5F  | -1.1 | -1.1 | -1.1 | -1.1 | unknown function, 5-prime end                                            | YJR011c | orf19.3916  |
| CA2460  | LYS1.3EOC    | -1.0 | -1.1 | -1.0 | -1.1 | Saccharopine dehydrogenase, 3-prime end                                  |         |             |
| CA0819  | VPS1         | -1.2 | -1.1 | -1.2 | -1.1 | member of the dynamin family of GTPases (by homology)                    | YKR001c | orf19.1949  |
| CA4860  | IPF19804     | -1.0 | -1.0 | -1.2 | -1.1 | unknown Function                                                         |         | orf19.3835  |
| CA1667  | SSL2         | -1.2 | -1.1 | -1.3 | -1.1 | by homology to <i>S. cerevisiae</i> : DNA helicase                       | YIL143c | orf19.2857  |
| CA3648  | MSF1         | -1.1 | -1.1 | -1.1 | -1.1 | phenylalanine--tRNA ligase                                               | YPR047w | orf19.2039  |
| CA3109  | IPF11829     | 1.2  | -1.0 | -1.1 | -1.1 | unknown function                                                         | YPL135w | orf19.6548  |
| CA1912  | SKY1         | -1.1 | -1.2 | -1.1 | -1.1 | SRPK1 like protein kinase (by homology)                                  | YMR216c | orf19.2436  |
| CA0036  | IPF19377     | -1.2 | -1.1 | 1.0  | -1.1 | unknown function                                                         |         | orf19.3336  |
| CA3596  | IPF6085      | -1.1 | -1.0 | -1.1 | -1.1 | unknown function                                                         |         | orf19.4924  |
| CA3677  | SOU3         | -1.1 | -1.1 | -1.2 | -1.1 | putative sorbitol utilization protein (by homology)                      |         | orf19.732   |
| CA0673  | AMO2         | -1.1 | -1.2 | 1.2  | -1.1 | amine oxidase (by homology)                                              |         | orf19.3152  |
| CA4455  | IPF8454      | 1.0  | -1.2 | -1.4 | -1.1 | unknown function                                                         |         | orf19.6853  |
| CA5415  | SMC4         | -1.0 | -1.1 | -1.3 | -1.1 | Stable Maintenance of Chromosomes (by homology)                          | YLR086w | orf19.964   |
| CA5094  | IPF1387      | -1.0 | -1.0 | -1.1 | -1.1 | unknown function                                                         |         | orf19.6448  |
| CA5104  | IPF1364      | 1.4  | -1.2 | -1.2 | -1.1 | unknown function                                                         | YGR243w | orf19.6435  |
| CA5490  | KIN3         | -1.1 | -1.2 | -1.2 | -1.1 | G2-specific serine/threonine protein kinase (by homology)                | YAR018c | orf19.5325  |
| CA2981  | CSE1.5F      | -1.4 | -1.2 | -1.3 | -1.1 | Importin-beta-like protein, 5-prime end (by homology)                    | YGL238w | orf19.1231  |
| CA2848  | ²F10785.EXON | -1.1 | -1.1 | -1.2 | -1.1 | unknown function, exon 2                                                 |         | orf19.5733  |
| CA4145  | IPF3130      | 1.0  | 1.1  | 1.0  | -1.1 | unknown function                                                         |         | orf19.4227  |
| CA4178  | IPF4421      | 1.0  | -1.1 | -1.0 | -1.1 | unknown function                                                         |         | orf19.2954  |
| CA3081  | EFT3         | -1.1 | 1.1  | -1.1 | -1.1 | translation elongation factor 3                                          | YNL014w | orf19.11629 |
| CA3333  | CDC48        | -1.1 | 1.1  | -1.1 | -1.1 | microsomal ATPase (by homology)                                          | YDL126c | orf19.9876  |
| CA1871  | ²F16981.EXON | -1.2 | -1.2 | -1.3 | -1.1 | unknown function, exon 1                                                 | YMR140w | orf19.9995  |
| CA2449  | ENP1         | 1.0  | -1.1 | -1.1 | -1.1 | Essential nuclear protein (by homology)                                  | YBR247c | orf19.5507  |



|        |              |      |      |      |      |                                                                  |         |             |
|--------|--------------|------|------|------|------|------------------------------------------------------------------|---------|-------------|
| CA3094 | IPF11548     | -1.3 | -1.2 | -1.1 | -1.1 | serine/threonine protein kinase (by homology)                    | YCR008w | orf19.11335 |
| CA5925 | MET8         | -1.1 | -1.3 | -1.2 | -1.1 | Siroheme synthase (by homology)                                  | YBR213w | orf19.6780  |
| CA4895 | IPF18161     | -1.1 | -1.3 | -1.1 | -1.1 | unknown function                                                 | YDR152w | orf19.6587  |
| CA0418 | IPF9051.5EOC | -1.2 | -1.1 | -1.1 | -1.1 | unknown function, 5-prime end                                    |         | orf19.2227  |
| CA3906 | IPF20149     | -1.0 | -1.2 | -1.2 | -1.1 | unknown function                                                 | YKR016w | orf19.11874 |
| CA3446 | IPF7324      | -1.1 | -1.1 | -1.2 | -1.1 | unknown function                                                 | YKL195w | orf19.2977  |
| CA0287 | IPF14615     | -1.0 | 1.0  | 1.0  | -1.1 | unknown function                                                 |         | orf19.6080  |
| CA4842 | MTD1         | 1.1  | -1.3 | -1.2 | -1.1 | methylenetetrahydrofolate dehydrogenase                          | YKR080w | orf19.3810  |
| CA3894 | YIF2         | -1.0 | 1.1  | -1.0 | -1.1 | general translation factor eIF2 homolog (by homology)            | YAL035w | orf19.5081  |
| CA3301 | IPF13782     | -1.0 | -1.1 | -1.2 | -1.1 | unknown function                                                 | YGL029w | orf19.2314  |
| CA0199 | KAP104       | -1.1 | -1.1 | -1.0 | -1.1 | karyopherin-beta protein (by homology)                           | YBR017c | orf19.3556  |
| CA6125 | IPF138       | -1.2 | -1.1 | -1.0 | -1.1 | unknown function                                                 | YDL237w | orf19.5925  |
| CA2334 | ADH3         | 1.1  | -1.1 | -1.0 | -1.1 | probable alcohol dehydrogenase (by homology)                     |         | orf19.11981 |
| CA5474 | PF16944.3EOC | 1.0  | -1.4 | -1.2 | -1.1 | unknown function, 3-prime end                                    | YMR014w | orf19.3287  |
| CA3246 | IPF15830     | -1.2 | -1.2 | -1.0 | -1.1 | unknown function                                                 | YML041c | orf19.4677  |
| CA0180 | SPT20        | 1.0  | -1.0 | -1.0 | -1.1 | transcription factor, member of the histone acetyltransferase    | YOL148c | orf19.422   |
| CA2400 | SUP45        | -1.3 | -1.2 | -1.0 | -1.1 | Translational release factor (by homology)                       | YBR143c | orf19.3541  |
| CA3244 | AGP2         | -1.2 | -1.1 | -1.2 | -1.1 | amino-acid permease (by homology)                                | YBR132c | orf19.4679  |
| CA1124 | UBP12        | -1.1 | -1.1 | -1.3 | -1.1 | ubiquitin C-terminal hydrolase (by homology)                     | YJL197w | orf19.6260  |
| CA2099 | IPF11484     | 1.0  | -1.1 | -1.2 | -1.1 | unknown function                                                 | YKL099c | orf19.2386  |
| CA4429 | DBF4         | 1.0  | -1.1 | -1.1 | -1.1 | regulatory subunit for Cdc7 by homology                          | YDR052c | orf19.5166  |
| CA4975 | IPF4706      | 1.0  | -1.0 | -1.1 | -1.1 | unknown Function                                                 | YGR072w | orf19.5277  |
| CA0956 | IPF14914     | -1.1 | -1.1 | -1.2 | -1.1 | putative ankyrin (by homology)                                   | YIL112w | orf19.12191 |
| CA3866 | IPF4606      | -1.3 | -1.3 | -1.2 | -1.1 | unknown Function                                                 | YML048w | orf19.6082  |
| CA1406 | DOT4         | 1.1  | -1.2 | -1.2 | -1.1 | derepression of telomeric silencing (by homology)                | YNL186w | orf19.3370  |
| CA3968 | IPF9378      | -1.0 | -1.1 | -1.1 | -1.1 | similar to <i>Saccharomyces cerevisiae</i> Soh1p suppressor      | YGL127c | orf19.1429  |
| CA2634 | ZWF1         | -1.6 | -1.2 | -1.2 | -1.1 | glucose-6-phosphate dehydrogenase (by homology)                  | YNL241c | orf19.12218 |
| CA4517 | MEX67        | -1.2 | -1.1 | -1.3 | -1.1 | poly(A)+RNA binding protein involved in nuclear mRNA             | YPL169c | orf19.488   |
| CA4067 | IPF5924      | -1.1 | -1.1 | -1.1 | -1.1 | unknown function                                                 | YNR040w | orf19.445   |
| CA0891 | IPF11764     | 1.0  | -1.2 | -1.3 | -1.1 | unknown function                                                 | YGL159w | orf19.4735  |
| CA4143 | DDP1         | -1.1 | -1.3 | -1.3 | -1.1 | diadenosine and diphosphoinositol polyphosphate phosphatase      | YOR163w | orf19.4229  |
| CA5223 | IPF3080      | -1.2 | -1.2 | 1.0  | -1.1 | unknown function (by homology)                                   |         | orf19.7042  |
| CA1197 | IFG1         | -1.0 | -1.0 | -1.0 | -1.1 | probable d-amino acid oxidase (by homology)                      |         | orf19.10873 |
| CA4841 | IPF10355     | 1.2  | 1.0  | 1.0  | -1.1 | unknown function                                                 | YKR099w | orf19.3809  |
| CA0196 | IPF15799     | -1.1 | -1.2 | -1.1 | -1.1 | unknown function                                                 |         | orf19.1651  |
| CA5338 | IPF889       | -1.0 | 1.1  | 1.0  | -1.1 | ATP-dependent RNA helicase (by homology)                         | YDR291w | orf19.7213  |
| CA2047 | RPL10        | 1.0  | -1.3 | -1.4 | -1.1 | Ribosomal protein L10 (by homology)                              | YLR075w | orf19.10452 |
| CA4648 | IPF9864      | -1.3 | -1.0 | -1.1 | -1.1 | similar to <i>Saccharomyces cerevisiae</i> Stu1p mitotic spindle | YBL034c | orf19.11914 |
| CA4574 | IPF9430      | -1.1 | -1.3 | -1.2 | -1.1 | similar to <i>Saccharomyces cerevisiae</i> Spo7p meiotic protein | YAL009w | orf19.6885  |
| CA0143 | IPF19195.5F  | -1.1 | -1.0 | -1.1 | -1.1 | putative amino acid or GABA permease, 5-prime end (by homology)  |         | orf19.153   |
| CA2103 | ISM1         | -1.1 | -1.1 | -1.3 | -1.1 | isoleucyl-tRNA synthetase (by homology)                          | YPL040c | orf19.9918  |
| CA3331 | POL.3        | -1.1 | 1.0  | -1.1 | -1.1 | Pol part of pCal retrotransposon                                 |         |             |
| CA2125 | IPF4893      | -1.1 | 1.0  | -1.1 | -1.1 | unknown function                                                 | YHR186c | orf19.418   |
| CA1402 | ECE1         | 1.0  | -1.1 | -1.2 | -1.1 | Cell Elongation Protein                                          |         | orf19.3374  |
| CA0813 | MPP10        | 1.0  | -1.3 | -1.3 | -1.1 | component of the U3 small nucleolar ribonucleoprotein            | YJR002w | orf19.1915  |
| CA0886 | IPF12382     | 1.2  | 1.0  | -1.0 | -1.1 | unknown function                                                 | YER002w | orf19.1388  |
| CA3650 | IPF4134      | -1.3 | 1.0  | -1.3 | -1.1 | unknown function                                                 | YKR008w | orf19.2041  |
| CA5340 | IPF883       | 1.0  | -1.1 | -1.1 | -1.1 | unknown function                                                 | YJL109c | orf19.7215  |
| CA1064 | PWP1         | -1.0 | -1.2 | -1.3 | -1.1 | beta-transducin superfamily (by homology)                        | YLR196w | orf19.12110 |

|        |             |      |      |      |      |                                                                              |         |             |
|--------|-------------|------|------|------|------|------------------------------------------------------------------------------|---------|-------------|
| CA1700 | RAM1.5F     | -1.1 | -1.1 | -1.2 | -1.1 | protein farnesyltransferase, beta subunit, 5-prime end (t                    | YDL090c | orf19.5046  |
| CA5402 | IFG3.3      | -1.0 | -1.3 | -1.2 | -1.1 | probable d-amino acid oxidase, 3-prime end (by homology)                     |         | orf19.944   |
| CA0916 | LYS2        | 1.1  | 1.1  | -1.0 | -1.1 | L-aminoadipate-semialdehyde dehydrogenase, large su                          | YBR115c | orf19.2970  |
| CA1041 | BMS1        | -1.2 | -1.3 | -1.3 | -1.1 | probable membrane protein involved in bud site selectic                      | YPL217c | orf19.2504  |
| CA5709 | IPF2653     | -1.3 | -1.0 | -1.5 | -1.1 | unknown function                                                             | YDR430c | orf19.7410  |
| CA3977 | IPF20153    | 1.1  | -1.3 | -1.2 | -1.1 | unknown function                                                             |         | orf19.1549  |
| CA1009 | IPF14084    | 1.0  | -1.3 | -1.2 | -1.1 | unknown function                                                             | YGR117c | orf19.6255  |
| CA1155 | JA2         | -1.1 | -1.3 | -1.2 | -1.1 | ATP-dependent RNA helicases-like (by homology)                               | YKL078w | orf19.107   |
| CA5499 | RPS4A       | 1.0  | -1.2 | -1.3 | -1.1 | ribosomal protein S4                                                         | YJR145c | orf19.5341  |
| CA1779 | IPF14510    | -1.0 | -1.2 | -1.1 | -1.1 | unknown function                                                             | YGL219c | orf19.1826  |
| CA1950 | IPF14019    | 1.0  | -1.3 | -1.3 | -1.1 | unknown function                                                             | YPR169w | orf19.12208 |
| CA2278 | IPF10806    | -1.1 | -1.2 | -1.1 | -1.1 | unknown function                                                             | YBR204c | orf19.782   |
| CA2401 | LEM3        | -1.1 | -1.1 | -1.2 | -1.1 | cell division cycle mutant (by homology)                                     | YNL323w | orf19.3542  |
| CA1370 | TCI1        | -1.2 | -1.2 | -1.2 | -1.1 | protein phosphatase Two C-Interacting protein (by hom                        | YDR161w | orf19.4963  |
| CA0978 | IPF16222    | 1.0  | 1.0  | 1.0  | -1.1 | unknown function                                                             | YDL233w | orf19.3603  |
| CA5388 | PET9        | 1.1  | -1.1 | 1.0  | -1.1 | ADP/ATP carrier protein (by homology)                                        | YBL030c | orf19.8545  |
| CA1863 | MRPL35      | -1.2 | -1.3 | -1.4 | -1.1 | Ribosomal protein of the large subunit, mitochondrial (b                     | YDR322w | orf19.863   |
| CA1814 | TRA1.5EOC   | -1.2 | -1.0 | -1.3 | -1.1 | ATM/Mec1/TOR1+2-related, 5-prime end (by homology)                           |         | orf19.139   |
| CA4335 | GAL83       | -1.0 | 1.1  | -1.1 | -1.1 | Glucose repression protein (by homology)                                     | YER027c | orf19.4084  |
| CA0201 | IPF15116    | -1.3 | -1.4 | -1.3 | -1.1 | Unknown function                                                             | YKL077w | orf19.9108  |
| CA5922 | MRS6        | -1.2 | -1.3 | -1.5 | -1.1 | geranylgeranyltransferase regulatory subunit                                 | YOR370c | orf19.6783  |
| CA4894 | IPF1617     | -1.1 | -1.2 | -1.0 | -1.1 | unknown function                                                             |         | orf19.6586  |
| CA3290 | IPF5734     | -1.4 | 1.1  | -1.1 | -1.1 | unknown function                                                             | YNL212w | orf19.6324  |
| CA3111 | RPL5        | -1.1 | -1.1 | -1.1 | -1.1 | ribosomal protein (by homology)                                              | YPL131w | orf19.6541  |
| CA4920 | GCN20       | -1.2 | -1.1 | -1.1 | -1.1 | Positive effector of Gcn2p (by homology)                                     | YFR009w | orf19.6060  |
| CA1647 | IPF16663    | -1.1 | -1.1 | -1.1 | -1.1 | unknown function                                                             | YKR020w | orf19.5568  |
| CA6126 | IPF143      | -1.1 | -1.1 | -1.0 | -1.1 | unknown function                                                             |         | orf19.5924  |
| CA4775 | IPF3342     | -1.1 | -1.0 | 1.0  | -1.1 | Unknown function                                                             | YDR198c | orf19.4007  |
| CA4599 | IPF2200     | -1.2 | -1.1 | -1.3 | -1.1 | Unknown function                                                             |         | orf19.6918  |
| CA2683 | IFU4        | -1.2 | -1.0 | -1.2 | -1.1 | Unknown function                                                             | YFL034w | orf19.2574  |
| CA5865 | MKC1        | -1.1 | -1.2 | -1.2 | -1.1 | ser/thr protein kinase of MAP kinase family                                  | YHR030c | orf19.7523  |
| CA5396 | NAM7        | -1.2 | -1.1 | -1.1 | -1.1 | nonsense-mediated mRNA decay protein (by homology)                           | YMR080c | orf19.939   |
| CA4114 | IPF7704     | -1.1 | -1.2 | -1.1 | -1.1 | unknown function                                                             |         | orf19.679   |
| CA1969 | IPF18579.3F | -1.0 | 1.0  | -1.0 | -1.2 | unknown function, 3-prime end                                                | YOL078w | orf19.5221  |
| CA3402 | IPF8651     | -1.0 | 1.0  | -1.0 | -1.2 | unknown function                                                             | YGR272c | orf19.3978  |
| CA1970 | IPF18579.5F | -1.1 | 1.0  | -1.3 | -1.2 | unknown function, 5-prime end                                                |         | orf19.5222  |
| CA5290 | IPF1943     | -1.1 | -1.1 | -1.0 | -1.2 | similar to Aspergillus (Emericella) nidulans cysteine synthase (by homology) |         | orf19.7152  |
| CA3796 | SGT2        | -1.2 | -1.1 | -1.3 | -1.2 | small glutamine-rich tetratricopeptide repeat containing                     | YOR007c | orf19.5823  |
| CA0905 | IPF4405     | -1.1 | -1.1 | 1.0  | -1.2 | unknown function                                                             |         | orf19.1482  |
| CA2571 | IPF13769    | 1.1  | -1.2 | -1.0 | -1.2 | unknown function                                                             | YKL221w | orf19.13590 |
| CA4136 | RET2        | -1.5 | -1.1 | -1.2 | -1.2 | Coatomer complex delta chain (by homology)                                   | YFR051c | orf19.4236  |
| CA2256 | IPF14757    | -1.1 | -1.2 | -1.3 | -1.2 | unknown function                                                             | YOR354c | orf19.1956  |
| CA0398 | ARO2        | -1.1 | -1.2 | -1.1 | -1.2 | chorismate synthase (by homology)                                            | YGL148w | orf19.1986  |
| CA5795 | TIM44       | -1.0 | -1.1 | -1.3 | -1.2 | mitochondrial inner membrane import receptor                                 | YIL022w | orf19.5444  |
| CA1710 | CLA4        | -1.1 | -1.1 | -1.1 | -1.2 | protein kinase homolog (by homology)                                         | YNL298w | orf19.4890  |
| CA2196 | IPF18517.5F | -1.2 | -1.2 | -1.5 | -1.2 | unknown function, 5-prime end                                                |         | orf19.11827 |
| CA2798 | IPF8402     | -1.3 | -1.4 | -1.4 | -1.2 | similar to Saccharomyces cerevisiae Sga1p glucan 1,4-                        | YIL099w | orf19.1719  |
| CA4354 | IPF3647     | -1.4 | -1.1 | -1.4 | -1.2 | unknown function                                                             |         | orf19.6729  |
| CA3539 | RPS22       | -1.2 | -1.3 | -1.2 | -1.2 | ribosomal protein by homology                                                | YHL015w | orf19.6375  |

|        |             |      |      |      |      |                                                                  |                  |             |
|--------|-------------|------|------|------|------|------------------------------------------------------------------|------------------|-------------|
| CA1227 | IPF16082    | 1.1  | -1.2 | -1.1 | -1.2 | unknown function                                                 | YDL104c          | orf19.4160  |
| CA2651 | HRD3        | -1.2 | -1.2 | -1.2 | -1.2 | involved in HMG-CoA reductase degradation (by homology)          | YLR207w          | orf19.1191  |
| CA1803 | IPF16748    | -1.1 | -1.1 | -1.2 | -1.2 | unknown function                                                 | YER006w          | orf19.2917  |
| CA4554 | IPF7874     | 1.0  | 1.0  | -1.0 | -1.2 | similar to <i>Saccharomyces cerevisiae</i> Esc4p involved in     | YHR154w          | orf19.1445  |
| CA2811 | RPS10       | -1.2 | -1.3 | -1.4 | -1.2 | Ribosomal protein 10                                             | YML063w          | orf19.10520 |
| CA3825 | IPF10654    | -1.1 | -1.1 | -1.1 | -1.2 | D-arabinitol dehydrogenase-like (by homology)                    |                  | orf19.5763  |
| CA2064 | IPF13024    | 1.0  | -1.1 | -1.1 | -1.2 | unknown function                                                 |                  | orf19.10169 |
| CA1084 | IPF1036     | -1.0 | -1.1 | -1.0 | -1.2 | unknown function                                                 |                  | orf19.4571  |
| CA5531 | GCD14       | 1.0  | -1.0 | -1.0 | -1.2 | Translational repressor of GCN4                                  | YJL125c          | orf19.7291  |
| CA4826 | IPF1206     | -1.1 | -1.1 | -1.3 | -1.2 | unknown function                                                 | YLR033w          | orf19.2070  |
| CA4235 | NCL1        | -1.3 | -1.3 | -1.5 | -1.2 | Probable proliferating-cell nucleolar antigen (by homology)      | YBL024w          | orf19.518   |
| CA3375 | IPF4684     | 1.1  | -1.2 | -1.2 | -1.2 | unknown function                                                 |                  | orf19.1857  |
| CA4433 | BCK1        | 1.0  | -1.2 | -1.3 | -1.2 | serine/threonine protein kinase of the MEKK family (by homology) | YJL095w          | orf19.5162  |
| CA3033 | IPF13202    | -1.1 | -1.1 | -1.2 | -1.2 | unknown function                                                 | YMR068w          | orf19.215   |
| CA1129 | IPF5197     | -1.0 | -1.3 | -1.3 | -1.2 | unknown function                                                 |                  | orf19.3610  |
| CA4471 | MCM3        | -1.3 | -1.1 | -1.3 | -1.2 | replication initiation protein (by homology)                     | YEL032w          | orf19.1901  |
| CA5545 | IPF5986     | 1.2  | -1.1 | -1.1 | -1.2 | similar to cytochrome-b5- and nitrate reductases                 | YML125c          | orf19.7307  |
| CA2453 | IPF9950     | 1.0  | -1.1 | -1.3 | -1.2 | unknown function                                                 | YKR090w          | orf19.10995 |
| CA5110 | FBP26       | -1.0 | -1.1 | -1.3 | -1.2 | Fructose-2,6-bisphosphatase (by homology)                        | YJL155c          | orf19.6423  |
| CA4296 | IPF2605     | -1.4 | -1.2 | -1.4 | -1.2 | unknown function                                                 | YOL098c          | orf19.6693  |
| CA4752 | ADE12       | -1.5 | -1.3 | -1.2 | -1.2 | adenylosuccinate synthetase (by homology)                        | YNL220w          | orf19.4827  |
| CA2828 | IPF17026    | 1.0  | -1.2 | -1.2 | -1.2 | unknown function                                                 |                  | orf19.1325  |
| CA1554 | GEA2.3F     | -1.8 | -1.2 | -1.6 | -1.2 | GTP/GDP exchange factor, 3-prime end (by homology)               | YEL022w          | orf19.1713  |
| CA3580 | IPF16141    | 1.0  | -1.0 | -1.0 | -1.2 | unknown function                                                 | YHR040w          | orf19.2260  |
| CA1271 | HIT1        | -1.1 | -1.1 | -1.0 | -1.2 | required for growth at high temperature (by homology)            | YJR055w          | orf19.2723  |
| CA5053 | IPF3707     | 1.0  | -1.0 | 1.0  | -1.2 | unknown function                                                 | YPL138c          | orf19.3018  |
| CA1362 | PEX3        | -1.0 | -1.2 | -1.4 | -1.2 | PEROXISOMAL MEMBRANE PROTEIN by homology                         | YDR329c          | orf19.4426  |
| CA3619 | CDC47.5     | -1.3 | -1.2 | -1.2 | -1.2 | cell division control protein, , 5-prime end (by homology)       | YBR202w          | orf19.202   |
| CA5633 | RPA135      | -1.0 | 1.2  | -1.1 | -1.2 | DNA-directed RNA polymerase I, 135 KD subunit (by homology)      | YPR010c          | orf19.7062  |
| CA1627 | SKO1.3      | 1.0  | -1.1 | -1.1 | -1.2 | Cre-binding bzip protein, 3-prime end (by homology)              | YNL167c          | orf19.1032  |
| CA1434 | SNI2        | -1.1 | -1.0 | -1.2 | -1.2 | Sec9 interacting protein (by homology)                           | YBL106c          | orf19.1203  |
| CA5189 | IPF10158    | -1.3 | -1.2 | -1.4 | -1.2 | Weak similarity to ScNup12p                                      | YKL057c          | orf19.4627  |
| CA0341 | XKS1        | -1.1 | -1.3 | -1.4 | -1.2 | xylulokinase (by homology)                                       | YGR194c          | orf19.1788  |
| CA3583 | IPF20137    | -1.0 | -1.2 | -1.2 | -1.2 | unknown function                                                 | YNR021w          | orf19.2257  |
| CA0606 | COP1        | -1.2 | -1.2 | -1.3 | -1.2 | coatamer complex alpha chain of secretory pathway vesicle        | YDL145c          | orf19.9241  |
| CA4999 | IPF2024     | -1.0 | -1.1 | -1.4 | -1.2 | unknown function                                                 | YNR049c          | orf19.5248  |
| CA0827 | IPF18859    | 1.0  | -1.3 | -1.2 | -1.2 | unknown function                                                 | YGL080w          | orf19.7884  |
| CA4461 | IPF8470     | -1.1 | -1.1 | -1.3 | -1.2 | unknown function                                                 | YEL015w          | orf19.6858  |
| CA2674 | IPF5846     | -1.1 | -1.1 | -1.3 | -1.2 | unknown function                                                 |                  | orf19.5495  |
| CA2985 | SET1        | -1.1 | -1.1 | -1.4 | -1.2 | Chromatin regulatory protein (by homology)                       | YHR119w          | orf19.6009  |
| CA5639 | DIP53.EXON2 | 1.0  | -1.1 | -1.1 | -1.2 | dicarboxylic amino acid permease, exon 2 (by homology)           |                  | orf19.7056  |
| CA5270 | SEC18.5F    | -1.5 | -1.1 | -1.5 | -1.2 | vesicular fusion protein by homology, 5-prime end                |                  | orf19.4993  |
| CA1011 | SRP101      | -1.2 | 1.1  | -1.2 | -1.2 | signal recognition particle receptor, alpha chain                | YDR292c          | orf19.11434 |
| CA6046 | IPF4931     | 1.0  | 1.0  | -1.1 | -1.2 | unknown function                                                 | YDR289c          | orf19.7662  |
| CA5440 | SRP54       | -1.2 | -1.1 | -1.1 | -1.2 | 54 kD signal recognition particle subunit                        | YPR088c          | orf19.3243  |
| CA0268 | PUF2.EXON2  | -1.3 | -1.1 | -1.1 | -1.2 | RNA-binding protein, exon 2 (by homology)                        | YJR091c          | orf19.4262  |
| CA1312 | IPF14241    | -1.1 | -1.1 | -1.1 | -1.2 | unknown function                                                 |                  | orf19.11117 |
| CA0021 | IPF19425    | -1.1 | -1.1 | -1.0 | -1.2 | unknown function                                                 | Missing in array | orf19.161   |
| CA5963 | IPF966      | -1.1 | -1.2 | -1.3 | -1.2 | unknown function                                                 | YML093w          | orf19.7552  |

|        |              |      |      |      |      |                                                                           |             |
|--------|--------------|------|------|------|------|---------------------------------------------------------------------------|-------------|
| CA1392 | IPF6149      | -1.1 | -1.1 | -1.1 | -1.2 | similar to <i>Saccharomyces cerevisiae</i> Ubp8p deubiquina YMR223w       | orf19.1767  |
| CA3425 | IPF11873     | -1.3 | -1.1 | -1.3 | -1.2 | similar to <i>Saccharomyces cerevisiae</i> Swa2p clathrin-bin YDR320c     | orf19.593   |
| CA2386 | ECM41.3      | -1.1 | -1.2 | -1.2 | -1.2 | involved in cell wall biogenesis and architecture, 3-prime end YKR076w    | orf19.2613  |
| CA5234 | IPF3014      | -1.1 | -1.3 | -1.3 | -1.2 | weak similarity to <i>S. cerevisiae</i> DOS2 involved in genon YDR068w    | orf19.5030  |
| CA1933 | IPF18586     | 1.1  | -1.1 | -1.2 | -1.2 | Unknown function                                                          | orf19.8381  |
| CA1818 | IPF7023.3    | -1.1 | -1.1 | -1.2 | -1.2 | unknown function, 3-prime end                                             | orf19.134   |
| CA0207 | IPF18002     | 1.1  | -1.1 | -1.3 | -1.2 | Unknown function                                                          | orf19.1226  |
| CA4313 | IPF2121      | -1.1 | -1.2 | -1.3 | -1.2 | unknown function                                                          | orf19.4110  |
| CA0579 | PF3184.EXON1 | -1.0 | -1.2 | -1.3 | -1.2 | unknown function, exon 1                                                  | orf19.3560  |
| CA2824 | IPF17888     | -1.0 | -1.3 | -1.3 | -1.2 | unknown function                                                          | orf19.1318  |
| CA2570 | PRO3         | 1.1  | -1.4 | -1.6 | -1.2 | delta 1-pyrroline-5-carboxylate reductase (by homology) YER023w           | orf19.5650  |
| CA0119 | RMT2         | -1.1 | -1.0 | -1.2 | -1.2 | N-delta-arginine methyltransferase (by homology) YDR465c                  | orf19.920   |
| CA3946 | MNN2         | -1.3 | -1.4 | -1.5 | -1.2 | Golgi alpha-1,2-mannosyltransferase (by homology)                         | orf19.9547  |
| CA4320 | ECM17        | -1.1 | 1.2  | -1.2 | -1.2 | Putative sulfite reductase (by homology) YJR137c                          | orf19.4099  |
| CA5776 | RML2         | -1.1 | -1.2 | -1.3 | -1.2 | Ribosomal L2 protein, mitochondrial (by homology) YEL050c                 | orf19.5420  |
| CA3898 | UBA2         | -1.3 | -1.0 | -1.2 | -1.2 | ubiquitin-activating -like enzyme by homology YDR390c                     | orf19.5074  |
| CA0719 | IPF9779.5    | 1.0  | -1.0 | -1.1 | -1.2 | serine/threonine protein kinase, 5-prime end (by homology)                | orf19.3456  |
| CA1763 | URA6         | 1.1  | -1.2 | -1.3 | -1.2 | Uridine-monophosphate kinase (by homology) YKL024c                        | orf19.5195  |
| CA5075 | IPF3610      | -1.1 | -1.1 | -1.1 | -1.2 | unknown function                                                          | orf19.3050  |
| CA5235 | IPF3015      | -1.2 | -1.3 | -1.2 | -1.2 | Similar to <i>E.coli</i> modF and photorepair protein phrA YDR061w        | orf19.5029  |
| CA4728 | VPS41.3F     | -1.2 | -1.2 | -1.3 | -1.2 | required for the vacuolar assembly, 3-prime end (by homology) YDR080w     | orf19.12322 |
| CA4242 | SEC26        | -1.3 | -1.1 | -1.5 | -1.2 | beta chain of secretory vesicles coatamer complex (by homology) YDR238c   | orf19.528   |
| CA5355 | IRR1.3F      | -1.2 | -1.2 | -1.2 | -1.2 | cohesin complex subunit, 3-prime end (by homology)                        | orf19.7232  |
| CA3221 | PF10000.5EOC | -1.2 | -1.1 | -1.4 | -1.2 | unknown function, 5-prime end                                             | orf19.6193  |
| CA3381 | NPR2         | -1.2 | -1.2 | -1.2 | -1.2 | nitrogen permease regulator (by homology) YEL062w                         | orf19.328   |
| CA4302 | DED81        | -1.2 | -1.0 | -1.3 | -1.2 | Asparaginyl-tRNA synthetase (by homology) YHR019c                         | orf19.6702  |
| CA2524 | IPF4322      | 1.1  | -1.2 | -1.2 | -1.2 | unknown function                                                          | orf19.5521  |
| CA0728 | IPF7345      | -1.2 | -1.0 | -1.2 | -1.2 | unknown function                                                          | orf19.11212 |
| CA5392 | IPF10571     | -1.0 | -1.2 | -1.2 | -1.2 | Unknown function                                                          | orf19.935   |
| CA1264 | STH1         | 1.0  | -1.0 | -1.2 | -1.2 | helicase related protein by homology                                      | orf19.239   |
| CA0562 | PSO2         | -1.1 | -1.1 | -1.2 | -1.2 | Interstrand crosslink repair protein (by homology) YMR137c                | orf19.2926  |
| CA3868 | CCT1         | -1.2 | -1.0 | -1.1 | -1.2 | component of chaperonin-containing T-complex (by homology) YDR212w        | orf19.401   |
| CA1110 | DIS3         | -1.3 | -1.1 | -1.2 | -1.2 | 3' to 5' exoribonuclease required for 3' end formation of 5S rRNA YOL021c | orf19.5229  |
| CA4705 | IPF4206      | -1.1 | -1.2 | -1.1 | -1.2 | unknown function                                                          | orf19.6934  |
| CA3211 | IPF19977     | 1.2  | -1.1 | -1.2 | -1.2 | unknown function                                                          | orf19.6192  |
| CA1588 | SPT8         | -1.1 | -1.3 | -1.4 | -1.2 | transcriptional adaptor or co-activator (by homology) YLR055c             | orf19.11787 |
| CA5930 | ECM29.EXON2  | -1.6 | 1.3  | -1.5 | -1.2 | Involved in cell wall biogenesis and architecture, exon 2 YHL030w         | orf19.6773  |
| CA3617 | IPF9069      | 1.1  | -1.1 | -1.0 | -1.2 | unknown function                                                          | orf19.199   |
| CA1609 | TES11        | -1.0 | -1.4 | -1.4 | -1.2 | Thioesterase (by homology)                                                | orf19.4121  |
| CA1477 | YME1         | -1.2 | -1.3 | -1.3 | -1.2 | family of ATPases                                                         | orf19.1252  |
| CA4010 | MAK10.3      | -1.2 | -1.2 | -1.3 | -1.2 | glucose-repressible protein, 3-prime end (by homology) YEL053c            | orf19.1624  |
| CA4870 | IPF19568     | 1.0  | -1.1 | -1.2 | -1.2 | unknown function                                                          | orf19.6556  |
| CA3778 | IPF10431     | -1.3 | -1.2 | -1.2 | -1.2 | unknown function                                                          | orf19.2888  |
| CA5138 | IPF1031      | -1.3 | -1.2 | -1.4 | -1.2 | Similar to aminoglycoside acetyltransferase regulator frc YPL109c         | orf19.4575  |
| CA1275 | RPC53        | 1.0  | -1.3 | -1.3 | -1.2 | DNA-directed RNA polymerase III (by homology) YDL150w                     | orf19.2715  |
| CA3885 | IPF19790     | -1.0 | 1.0  | -1.2 | -1.2 | unknown function                                                          | orf19.5095  |
| CA1256 | UBP15        | -1.5 | -1.3 | -1.4 | -1.2 | ubiquitin-specific protease (by homology) YMR304w ; Missing in array      | orf19.1777  |
| CA0834 | IPF12498.3F  | -1.2 | -1.4 | -1.2 | -1.2 | unknown function, 3-prime end                                             | orf19.1677  |
| CA4289 | IPF6665      | -1.0 | -1.3 | -1.3 | -1.2 | unknown function                                                          | orf19.6686  |

|        |              |      |      |      |      |                                                                           |             |
|--------|--------------|------|------|------|------|---------------------------------------------------------------------------|-------------|
| CA0773 | UGA11.EXON1  | -1.0 | -1.3 | -1.3 | -1.2 | 4-aminobutyrate aminotransferase, exon 1 (by homolog YGR019w              | orf19.854   |
| CA2675 | GSP1         | -1.2 | -1.3 | -1.3 | -1.2 | GTP-binding protein (by homology) YLR293c                                 | orf19.5493  |
| CA5063 | IPF8493      | 1.1  | -1.2 | -1.1 | -1.2 | putative member of nontransporter group of ATP-binding YDR091c            | orf19.3034  |
| CA1986 | IPF14899     | -1.1 | -1.2 | -1.4 | -1.2 | unknown function YFR016c                                                  | orf19.92    |
| CA2560 | PEX5         | -1.1 | -1.2 | -1.2 | -1.2 | peroxisomal targeting signal receptor YDR244w                             | orf19.5640  |
| CA4238 | PIM1         | -1.0 | -1.0 | -1.1 | -1.2 | mitochondrial ATP-dependent protease (by homology) YBL022c                | orf19.522   |
| CA5096 | IPF1384      | 1.1  | -1.2 | -1.3 | -1.2 | similar to <i>Saccharomyces cerevisiae</i> Eci1p delta3-cis-delta YLR284c | orf19.6445  |
| CA5365 | IPF824       | 1.3  | -1.3 | -1.4 | -1.2 | 2-hydroxyhepta-2,4-diene-1,7-dioate isomerase (by homology) YNL168c       | orf19.7244  |
| CA2403 | IPF6438      | 1.0  | -1.3 | -1.3 | -1.2 | unknown function YML131w                                                  | orf19.3544  |
| CA5967 | IPF955       | -1.0 | -1.0 | -1.1 | -1.2 | member of the AAA ATPase family of proteins (by homology) YER047c         | orf19.7558  |
| CA4796 | IPF3380      | 1.1  | -1.1 | -1.2 | -1.2 | unknown function YIR007w                                                  | orf19.4031  |
| CA5527 | IPF2856      | -1.1 | -1.1 | -1.1 | -1.2 | unknown function YGR156w                                                  | orf19.7285  |
| CA3240 | IPF10559     | -1.2 | -1.2 | -1.5 | -1.2 | myosin-like protein (by homology) YKR095w                                 | orf19.4683  |
| CA4712 | GTT1.3       | 1.0  | -1.1 | -1.2 | -1.2 | glutathione S-transferase, 3-prime end (by homology) YIR038c              | orf19.6947  |
| CA4078 | VMA2         | -1.3 | -1.2 | -1.2 | -1.2 | H <sup>+</sup> -transporting ATPase (by homology) YBR127c                 | orf19.6634  |
| CA2497 | TEL1.3EOC    | 1.0  | -1.1 | -1.3 | -1.2 | Putative phosphatidylinositol kinase involved in controlling YBL088c      | orf19.5580  |
| CA2505 | IPF6796      | -1.3 | -1.2 | -1.6 | -1.2 | unknown function YBR130c                                                  | orf19.5595  |
| CA4521 | MRPL40       | -1.1 | -1.3 | -1.4 | -1.2 | Putative mitochondrial ribosomal protein (by homology) YPL173w            | orf19.484   |
| CA0748 | TFS1         | 1.1  | -1.2 | -1.3 | -1.2 | cdc25-dependent nutrient- and ammonia-response cell- YLR178c              | orf19.1974  |
| CA0823 | PF11987.3EOC | 1.1  | -1.1 | -1.2 | -1.2 | unknown function, 3-prime end                                             | orf19.692   |
| CA4659 | IPF17754     | -1.2 | -1.1 | -1.1 | -1.2 | low affinity high capacity ammonium permease (by homology)                | orf19.4446  |
| CA5237 | ZMS1         | 1.0  | -1.2 | -1.2 | -1.2 | Zinc Finger Protein C2H2 (by homology) YML081w                            | orf19.5026  |
| CA3065 | IPF19775     | -1.1 | -1.1 | -1.4 | -1.2 | unknown function                                                          | orf19.11758 |
| CA2971 | MDL2.5F      | -1.2 | -1.2 | -1.2 | -1.2 | ATP-binding transporter, 5-prime end (by homology)                        | orf19.5600  |
| CA2719 | SOD2         | 1.2  | -1.2 | -1.3 | -1.2 | Manganese-superoxide dismutase YHR008c                                    | orf19.3340  |
| CA1828 | CDC22.3EOC   | -1.1 | -1.1 | -1.3 | -1.2 | DNA Polymerase III, 3-prime end                                           |             |
| CA4532 | IPF4386      | -1.1 | -1.2 | -1.2 | -1.2 | unknown function                                                          | orf19.1473  |
| CA0617 | MET2         | -1.0 | -1.3 | -1.3 | -1.2 | Homoserine O-acetyltransferase YNL277w                                    | orf19.2618  |
| CA4673 | IPF3661      | 1.0  | -1.3 | -1.4 | -1.2 | unknown function                                                          | orf19.899   |
| CA5834 | LRG1         | -1.1 | -1.2 | -1.3 | -1.2 | GTPase-activating protein of the rho/rac family (by homology) YDL240w     | orf19.7489  |
| CA4817 | POM152       | -1.1 | 1.0  | -1.3 | -1.2 | Nuclear pore membrane glycoprotein (by homology) YMR129w                  | orf19.2081  |
| CA1097 | IPF7575      | -1.1 | -1.1 | -1.2 | -1.2 | putative endo-exonuclease (by homology)                                   | orf19.4365  |
| CA5443 | IPF18105.5F  | -1.1 | -1.1 | -1.3 | -1.2 | unknown function, 3-prime end                                             | orf19.3246  |
| CA1459 | IPF6340      | -1.1 | -1.1 | -1.1 | -1.2 | unknown function                                                          | orf19.1107  |
| CA0945 | IPF10278     | -1.2 | -1.2 | -1.5 | -1.2 | DNA-J - like protein (by homology) YER048c                                | orf19.8853  |
| CA1589 | IPF16988     | -1.1 | -1.2 | -1.3 | -1.2 | unknown function                                                          | orf19.11788 |
| CA1404 | IPF19554.5F  | -1.1 | -1.2 | -1.4 | -1.2 | unknown function, 5-prime end                                             | orf19.3372  |
| CA2896 | IPF14981     | -1.2 | -1.4 | -1.5 | -1.2 | unknown function YPL206c                                                  | orf19.3483  |
| CA2457 | MCR1         | -1.1 | -1.6 | -1.5 | -1.2 | NADH-cytochrome-b5 reductase (by homology) YKL150w                        | orf19.3507  |
| CA2622 | PER3.EXON2   | -1.1 | -1.3 | -1.4 | -1.2 | peroxisomal import protein, exon 2 (by homology)                          | orf19.2806  |
| CA3008 | IPF12147     | -1.1 | -1.2 | -1.0 | -1.2 | unknown function YNL181w                                                  | orf19.13613 |
| CA1364 | IPF5561      | -1.0 | -1.1 | -1.4 | -1.2 | unknown function                                                          | orf19.4423  |
| CA3147 | IPF9803      | -1.1 | -1.1 | -1.3 | -1.2 | unknown function YMR031c                                                  | orf19.6160  |
| CA0181 | NOT3         | -1.0 | -1.0 | -1.1 | -1.2 | unknown function                                                          | orf19.2012  |
| CA1179 | IPF5064      | -1.0 | -1.5 | -1.6 | -1.2 | ADP/ATP carrier protein (by homology) YPR011c                             | orf19.804   |
| CA5327 | SLA2         | -1.3 | -1.2 | -1.4 | -1.2 | Cytoskeleton assembly control protein YNL243w                             | orf19.7201  |
| CA2480 | CCT7         | -1.2 | -1.1 | -1.2 | -1.2 | component of chaperonin-containing T-complex (by homology) YJL111w        | orf19.10718 |
| CA5923 | IFQ2         | -1.2 | -1.3 | -1.3 | -1.2 | Unknown function                                                          | orf19.6782  |
| CA1846 | FDH12        | -1.1 | -1.2 | -1.5 | -1.2 | Formate dehydrogenase (by homology) YOR388c                               | orf19.638   |



|        |              |      |      |      |      |                                                        |                            |             |
|--------|--------------|------|------|------|------|--------------------------------------------------------|----------------------------|-------------|
| CA2322 | YSH1         | -1.3 | -1.1 | -1.3 | -1.2 | component of pre-mRNA polyadenylation factor PF I (by  | YLR277c                    | orf19.5486  |
| CA4564 | IPF6572      | 1.1  | -1.1 | 1.1  | -1.2 | unknown function                                       |                            | orf19.6874  |
| CA3073 | IPF6108      | -1.1 | -1.2 | -1.2 | -1.2 | putative tricarboxylate carrier (by homology)          | YOR271c                    | orf19.4811  |
| CA1253 | FDH3.3F      | -1.1 | -1.2 | -1.2 | -1.2 | formate dehydrogenase, 3-prime end (by homology)       |                            | orf19.1774  |
| CA1349 | PRP12        | -1.2 | 1.1  | -1.0 | -1.2 | involved in early maturation of pre-rRNA (by homology) | YMR302c                    | orf19.4351  |
| CA3119 | IPF5360.3    | -1.1 | -1.2 | -1.1 | -1.2 | unknown function, 3-prime end                          |                            |             |
| CA4549 | IPF7863      | 1.0  | -1.2 | -1.2 | -1.2 | unknown function                                       | YNL335w                    | orf19.1449  |
| CA3757 | MAE1         | -1.2 | 1.0  | 1.2  | -1.2 | mitochondrial malic enzyme (by homology)               | YKL029c                    | orf19.3419  |
| CA5032 | IPF2982      | -1.2 | -1.1 | -1.2 | -1.2 | unknown function                                       |                            | orf19.6986  |
| CA1465 | RIM11        | -1.2 | -1.3 | -1.2 | -1.2 | Ser/thr protein kinase (by homology)                   |                            | orf19.791   |
| CA0277 | RNH1         | 1.0  | -1.1 | -1.2 | -1.2 | ribonuclease H (by homology)                           |                            | orf19.13057 |
| CA0621 | IPF17999     | 1.2  | -1.1 | -1.2 | -1.2 | unknown function                                       |                            | orf19.3148  |
| CA1842 | ARO1         | 1.1  | -1.1 | -1.0 | -1.2 | arom pentafunctional enzyme (by homology)              | YDR127w                    | orf19.4704  |
| CA6090 | IPF44        | -1.2 | -1.2 | -1.2 | -1.2 | unknown function                                       | YDL189w                    | orf19.5967  |
| CA1532 | IPF9507      | -1.2 | -1.1 | -1.4 | -1.2 | unknown function                                       | YMR247c                    | orf19.8806  |
| CA3321 | IPF6896.5F   | -1.2 | -1.2 | -1.3 | -1.2 | unknown function, 5-prime end                          | YHR188c                    | orf19.2677  |
| CA2658 | IPF8105      | -1.0 | -1.2 | -1.2 | -1.2 | unknown function                                       | YLR380w                    | orf19.5711  |
| CA3007 | IPF12148     | -1.1 | -1.3 | -1.2 | -1.2 | Unknown function                                       | YNL182c                    | orf19.13614 |
| CA1682 | CIRT3        | -1.1 | -1.1 | -1.1 | -1.2 | Putative transposase                                   |                            | orf19.4918  |
| CA3892 | PSE1         | -1.2 | -1.0 | -1.2 | -1.2 | karyopherin-beta protein (by homology)                 | YMR308c                    | orf19.5085  |
| CA5728 | IPF2471      | -1.1 | -1.5 | -1.5 | -1.2 | maltose acetyltransferase                              | YJL218w                    | orf19.7437  |
| CA2827 | RAD2         | -1.0 | -1.1 | -1.3 | -1.2 | structure-specific nuclease of the                     | nucleotide YGR258c         | orf19.1324  |
| CA0477 | IPF13839     | -1.1 | -1.2 | 1.0  | -1.2 | unknown function                                       |                            | orf19.6017  |
| CA1385 | IPF8424      | -1.3 | -1.2 | -1.3 | -1.2 | unknown function                                       |                            | orf19.925   |
| CA1118 | IPF9987      | 1.0  | -1.0 | -1.3 | -1.2 | similar to phosphatidylinositol kinase (by homology)   |                            | orf19.2290  |
| CA2847 | PF10785.EXON | -1.1 | -1.3 | -1.3 | -1.2 | unknown function, exon 1                               | YNR053c                    | orf19.5732  |
| SCTEF1 |              | -1.1 | -1.1 | -1.2 | -1.2 |                                                        |                            |             |
| CA4491 | SWR1         | -1.1 | -1.1 | -1.6 | -1.2 | putative DNA helicase (by homology)                    | YDR334w                    | orf19.9427  |
| CA1822 | IPF9525      | -1.3 | -1.4 | -1.5 | -1.2 | unknown function                                       | YLR222c                    | orf19.4268  |
| CA2333 | ADH4         | 1.2  | -1.2 | -1.2 | -1.2 | probable alcohol dehydrogenase (by homology)           |                            | orf19.11980 |
| CA2423 | SDH41        | -1.0 | -1.5 | -1.3 | -1.2 | succinate dehydrogenase membrane anchor subunit fo     | YDR178w                    | orf19.11949 |
| CA2154 | ERG2         | 1.0  | -1.3 | -1.3 | -1.2 | C-8 sterol isomerase                                   | YMR202w                    | orf19.6026  |
| CA2988 | SIN3.EXON2   | -1.0 | 1.0  | -1.1 | -1.2 | Histone deacetylase by homology                        |                            |             |
| CA5015 | IPF11118     | -1.1 | -1.2 | -1.5 | -1.2 | unknown function                                       |                            | orf19.6967  |
| CA0532 | IRE1         | -1.1 | -1.0 | -1.0 | -1.2 | protein kinase (by homology)                           | YHR079c                    | orf19.5068  |
| CA0283 | IPF18034     | -1.1 | -1.1 | -1.6 | -1.2 | Unknown function                                       |                            |             |
| CA3302 | IPF13784     | 1.0  | -1.1 | -1.0 | -1.2 | unknown function                                       |                            | orf19.2313  |
| CA3165 | FMI1         | -1.4 | -1.1 | -1.4 | -1.2 | processing of pre-ribosomal RNA                        | YMR229c                    | orf19.1578  |
| CA3608 | IPF3857      | -1.1 | -1.2 | -1.2 | -1.2 | unknown function                                       | YOL093w                    | orf19.25    |
| CA3052 | DPS1         | -1.3 | -1.2 | -1.2 | -1.2 | aspartyl-tRNA synthetase (by homology)                 | YLL018c ; Missing in array | orf19.9945  |
| CA4578 | RFC1         | -1.0 | -1.1 | -1.3 | -1.2 | DNA replication factor C (by homology)                 | YOR217w                    | orf19.6891  |
| CA5124 | GSH2         | -1.2 | -1.2 | -1.3 | -1.2 | Glutathione synthetase (by homology)                   | YOL049w                    | orf19.6404  |
| CA5090 | IFG4         | -1.1 | -1.4 | -1.4 | -1.2 | probable d-amino acid oxidase (by homology)            |                            | orf19.3065  |
| CA2589 | KRE1         | -1.0 | -1.1 | -1.1 | -1.2 | secretory pathway protein                              |                            | orf19.4377  |
| CA4620 | IFD3         | -1.1 | -1.2 | -1.3 | -1.2 | OXIDOREDUCTASE (by homology)                           |                            | orf19.3311  |
| CA5669 | IPF1264      | -1.0 | 1.0  | -1.0 | -1.2 | unknown function, Asn rich                             |                            | orf19.7371  |
| CA0810 | RRN3         | 1.2  | -1.1 | -1.2 | -1.2 | RNA polymerase I specific transcription                | factc YKL125w              | orf19.1923  |
| CA2399 | MAK5         | -1.1 | -1.2 | -1.2 | -1.2 | ATP-dependent RNA helicase (by homology)               | YBR142w                    | orf19.3540  |
| CA1388 | IPF16514     | -1.1 | -1.0 | -1.2 | -1.2 | unknown function                                       |                            | orf19.921   |

|        |              |      |      |      |      |                                                                                              |             |
|--------|--------------|------|------|------|------|----------------------------------------------------------------------------------------------|-------------|
| CA5056 | IPF3698      | 1.1  | -1.3 | -1.4 | -1.2 | similar to <i>Saccharomyces cerevisiae</i> Rsm24p mitochondrion YDR175c                      | orf19.3022  |
| CA2910 | IPF11421     | -1.2 | -1.2 | -1.3 | -1.2 | unknown function                                                                             | orf19.4517  |
| CA2146 | IPF12799     | -1.0 | -1.2 | -1.2 | -1.2 | unknown function                                                                             | orf19.2515  |
| CA5261 | IPF1805      | -1.3 | -1.3 | -1.4 | -1.2 | unknown function                                                                             | orf19.5003  |
| CA1261 | IPF9887.3EOC | -1.4 | 1.1  | -1.5 | -1.2 | unknown function, 3-prime end                                                                | orf19.1240  |
| CA2170 | IPF4563.3F   | -1.1 | 1.3  | -2.1 | -1.2 | similar to <i>saccharomyces cerevisiae</i> Tom1p E3 ubiquitin ligase required for G2/M trans | orf19.912   |
| CA2716 | IPF7353      | -1.1 | -1.3 | -1.4 | -1.2 | unknown function                                                                             | orf19.577   |
| CA5323 | IPF2142      | -1.2 | -1.3 | -1.2 | -1.2 | unknown function                                                                             | orf19.7197  |
| CA3864 | RPL16A       | -1.0 | -1.2 | -1.4 | -1.2 | ribosomal protein (by homology)                                                              | orf19.6085  |
| CA2364 | MEC1         | -1.2 | -1.0 | -1.2 | -1.2 | cell cycle checkpoint protein (by homology)                                                  | orf19.8870  |
| CA3272 | ALD4         | -1.1 | -1.2 | -1.3 | -1.2 | aldehyde dehydrogenase, mitochondrial (by homology)                                          | orf19.6306  |
| CA1073 | PRORS.3F     | -1.1 | -1.2 | -1.3 | -1.2 | prolyl-tRNA synthetase, 3-prime end                                                          | orf19.2533  |
| CA4905 | DLD1         | -1.0 | -1.3 | -1.4 | -1.2 | D-lactate ferricytochrome C oxidoreductase (by homology)                                     | orf19.6043  |
| CA2548 | IPF9101      | 1.5  | -1.3 | -1.3 | -1.2 | unknown function                                                                             | orf19.2833  |
| CA4339 | IPF3618      | -1.2 | -1.3 | -1.3 | -1.2 | Unknown function                                                                             | orf19.6710  |
| CA2202 | SCW4         | 1.2  | -1.3 | -1.1 | -1.2 | cell wall glucanase (by homology)                                                            | orf19.2941  |
| CA3860 | KEL1         | -1.0 | -1.2 | -1.4 | -1.2 | involved in cell fusion and morphology (by homology)                                         | orf19.6092  |
| CA4804 | ARO8         | -1.3 | -1.2 | -1.3 | -1.2 | aromatic amino acid aminotransferase I (by homology)                                         | orf19.2098  |
| CA1578 | NUM11        | -1.0 | 1.1  | -1.4 | -1.2 | nuclear migration protein (by homology)                                                      | orf19.4715  |
| CA4878 | OXA1         | -1.0 | -1.2 | -1.2 | -1.2 | Cytochrome oxidase biogenesis protein (by homology)                                          | orf19.6565  |
| CA1501 | IPF13217     | -1.0 | -1.2 | -1.3 | -1.2 | unknown function                                                                             | orf19.9265  |
| CA2602 | IPF5473      | -1.0 | 1.0  | -1.4 | -1.2 | unknown function                                                                             | orf19.5679  |
| CA4839 | NPL6         | 1.0  | -1.1 | -1.1 | -1.2 | Nuclear protein localization factor (by homology)                                            | orf19.2055  |
| CA3524 | LKH1.3       | -1.3 | -1.0 | -1.1 | -1.2 | PROBABLE LEUKOTRIENE A-4 HYDROLASE (LTA-4                                                    | orf19.992   |
| CA4939 | IQG1         | -1.3 | -1.1 | -1.4 | -1.2 | RAS GTPase-activating-like protein by homology                                               | orf19.6536  |
| CA1742 | IPF12210     | -1.1 | -1.4 | -1.3 | -1.2 | quinolinate phosphoribosyltransferase (by homology)                                          | orf19.5054  |
| CA1247 | IPF3870      | -1.5 | 1.0  | -1.6 | -1.2 | similar to <i>Saccharomyces cerevisiae</i> Rts1p potential repressor YOR014w                 | orf19.20    |
| CA3775 | AFG1         | -1.0 | -1.5 | -1.4 | -1.2 | ATPase family gene (by homology)                                                             | orf19.2891  |
| CA1598 | SES1         | -1.5 | -1.4 | -1.4 | -1.2 | seryl-tRNA synthetase (by homology)                                                          | orf19.7901  |
| CA3789 | IPF11217     | -1.4 | -1.3 | -1.6 | -1.2 | similar to <i>Saccharomyces cerevisiae</i> Lhs1p chaperone YKL073w                           | orf19.13252 |
| CA0573 | PEX14        | -1.2 | -1.2 | -1.4 | -1.2 | peroxisomal protein (by homology)                                                            | orf19.9371  |
| CA0352 | RPB4.5F      | -1.0 | -1.3 | -1.4 | -1.2 | DNA-directed RNA polymerase II, 32 kDa subunit, 5-prime end (by homology)                    | orf19.146   |
| CA1489 | ATP3.3       | 1.2  | -1.4 | -1.2 | -1.2 | F1F0-ATPase complex, F1 gamma subunit, 3-prime end YBR039w                                   | orf19.10734 |
| CA4115 | IPF7706      | -1.2 | -1.3 | -1.3 | -1.2 | putative plasma membrane phosphatase (by homology) YPL063w                                   | orf19.680   |
| CA3046 | IPF7295      | -1.2 | -1.2 | -1.4 | -1.2 | unknown function                                                                             | orf19.2417  |
| CA2171 | PEP1.3       | -1.6 | -1.1 | -1.5 | -1.2 | Vacuolar protein sorting/targeting protein, 3-prime end YBL017c                              | orf19.3767  |
| CA0464 | IPF14116     | 1.1  | -1.5 | -1.3 | -1.2 | unknown function                                                                             | orf19.7798  |
| CA4411 | BRR2         | -1.1 | -1.1 | -1.4 | -1.2 | RNA helicase-related protein (by homology)                                                   | orf19.3098  |
| CA1329 | MRF2         | -1.1 | -1.4 | -1.4 | -1.2 | peptide chain release factor, mitochondrial (t YGL143c                                       | orf19.1303  |
| CA2018 | STE11        | -1.2 | -1.1 | -1.2 | -1.2 | ser/thr protein kinase of the MEKK family (by homology) YLR362w                              | orf19.844   |
| CA1505 | POT1         | 1.1  | -1.3 | -1.5 | -1.2 | Acetyl-CoA C-acyltransferase, peroxisomal (by homology)                                      | orf19.9271  |
| CA3675 | PF19529.EXON | -1.2 | -1.3 | -1.4 | -1.2 | unknown function, exon 2                                                                     | orf19.6453  |
| CA4724 | PDC2         | -1.1 | -1.1 | -1.1 | -1.2 | pyruvate decarboxylase regulator                                                             | orf19.12327 |
| CA3487 | IPF3203      | -1.2 | -1.4 | -1.5 | -1.2 | unknown function                                                                             | orf19.3569  |
| CA2772 | IPF20112     | -1.1 | -1.2 | -1.4 | -1.2 | unknown function                                                                             | orf19.2688  |
| CA4810 | IPF1164      | -1.2 | -1.2 | -1.3 | -1.2 | Subunit NUHM of NADH:Ubiquinone Oxidoreductase (by homology)                                 | orf19.2091  |
| CA3161 | IPF13121.3   | 1.2  | -1.6 | -1.2 | -1.2 | unknown function, 3-prime end                                                                | orf19.1584  |
| CA2003 | IPF16471     | -1.2 | -1.4 | -1.5 | -1.2 | unknown function                                                                             | orf19.2795  |
| CA2729 | NAT2         | 1.1  | -1.2 | -1.2 | -1.2 | N-acetyltransferase for N-terminal methionine (by homo YGR147c                               | orf19.9664  |

|        |              |      |      |      |      |                                                                           |         |             |
|--------|--------------|------|------|------|------|---------------------------------------------------------------------------|---------|-------------|
| CA0139 | RUD3         | -1.1 | -1.3 | -1.5 | -1.2 | Suppressor of uso1-1 transport defect (by homology)                       | YOR216c | orf19.14182 |
| CA4666 | IPF6542      | -1.1 | -1.3 | -1.2 | -1.2 | unknown function                                                          | YNL164c | orf19.4455  |
| CA1701 | CFL11        | 1.1  | -1.0 | -1.0 | -1.2 | Ferric reductase (by homology)                                            |         | orf19.701   |
| CA4475 | IPF6455      | -1.2 | -1.1 | -1.4 | -1.2 | unknown function                                                          |         | orf19.1893  |
| CA5249 | PCM1         | -1.2 | -1.3 | -1.3 | -1.2 | phosphoacetylglucosamine mutase (by homology)                             | YEL058w | orf19.5013  |
| CA3070 | PPA2         | -1.1 | -1.2 | -1.2 | -1.2 | Mitochondrial inorganic pyrophosphatase                                   | YMR267w | orf19.4807  |
| CA5652 | IPF19815     | -1.0 | -1.1 | -1.3 | -1.2 | longevity-assurance protein (by homology)                                 |         | orf19.7354  |
| CA4959 | HSP90        | -1.2 | -1.1 | -1.5 | -1.2 | heat shock protein                                                        | YMR186w | orf19.6515  |
| CA5228 | RTF1.3EOC    | -1.2 | -1.3 | -1.1 | -1.2 | Regulates DNA binding properties of TBP, 3-prime end                      | YGL244w | orf19.7047  |
| CA0216 | IPF11681     | -1.2 | -1.3 | -1.6 | -1.2 | unknown function                                                          |         | orf19.1682  |
| CA5549 | ERG13        | -1.1 | -1.2 | -1.2 | -1.2 | 3-hydroxy-3-methylglutaryl coenzyme A synthase (by homology)              | YML126c | orf19.7312  |
| CA0665 | INT1         | -1.2 | -1.0 | -1.2 | -1.2 | integrin-like protein alpha chain                                         | YJR092w | orf19.11733 |
| CA5529 | IPF2852      | -1.2 | -1.2 | -1.5 | -1.2 | putative acetyl-coenzyme-A dehydrogenase                                  |         | orf19.7288  |
| CA4831 | IPF1212      | -1.1 | -1.2 | -1.0 | -1.2 | unknown function                                                          | YJR129c | orf19.2066  |
| CA5844 | PXA1         | -1.1 | -1.4 | -1.4 | -1.2 | long chain fatty acid ABC transporter (by homology)                       | YPL147w | orf19.7500  |
| CA0394 | IPF12758.5F  | 1.3  | -1.3 | -1.4 | -1.2 | unknown function, 5-prime end                                             |         | orf19.7966  |
| CA1063 | NMT1         | -1.1 | -1.2 | -1.2 | -1.2 | N-myristoyltransferase                                                    | YLR195c | orf19.4641  |
| CA3154 | FUN34.5EOC   | 1.1  | -1.3 | -1.3 | -1.2 | unknown function, 5-prime end                                             |         |             |
| CA1466 | IPF13324     | -1.4 | -1.3 | -1.5 | -1.2 | unknown function                                                          |         | orf19.8411  |
| CA5114 | IPF1334      | -1.0 | -1.2 | -1.4 | -1.2 | Conserved hypothetical protein                                            | YDL060w | orf19.6417  |
| CA5423 | ROT2         | -1.2 | -1.2 | -1.3 | -1.2 | Glucosidase II, catalytic subunit (by homology)                           | YBR229c | orf19.974   |
| CA5611 | SUA5         | 1.1  | -1.2 | -1.1 | -1.2 | translation initiation protein (by homology)                              | YGL169w | orf19.7088  |
| CA3300 | RTG3         | -1.0 | -1.2 | -1.3 | -1.2 | Probable bHLH/zip transcription factor that regulates C1                  | YBL103c | orf19.2315  |
| CA5957 | RRP3.3EOC    | -1.2 | -1.3 | -1.3 | -1.2 | RNA-dependent ATPase, helicase, required for maturation                   | YHR065c | orf19.7546  |
| CA2810 | EFT2         | -1.1 | -1.0 | -1.2 | -1.2 | translation elongation factor 2                                           | YOR133w | orf19.5788  |
| CA6159 | IPF1837      | -1.3 | -1.3 | -1.2 | -1.2 | unknown function                                                          | YOR377w | orf19.5877  |
| CA2388 | MCM6         | -1.3 | -1.1 | -1.3 | -1.2 | component of MCM initiator complex involved in DNA replication            | YGL201c | orf19.2611  |
| CA2700 | PF14414.EXON | -1.1 | -1.2 | -1.3 | -1.2 | unknown function, exon 1                                                  |         | orf19.10254 |
| CA0786 | IPF7473      | -1.2 | -1.4 | -1.4 | -1.2 | unknown function                                                          | YDL144c | orf19.2446  |
| CA2119 | MTR4         | -1.2 | -1.3 | -1.5 | -1.2 | RNA Helicase (by homology)                                                | YJL050w | orf19.8915  |
| CA3526 | MRPS5        | -1.0 | -1.3 | -1.3 | -1.2 | Probable ribosomal protein S5, mitochondrial (by homology)                | YBR251w | orf19.8604  |
| CA3714 | IPF16223     | -1.3 | -1.3 | -1.6 | -1.2 | unknown function                                                          | YGR198w | orf19.11639 |
| CA4723 | IPF18177     | 1.1  | -1.3 | -1.2 | -1.2 | Unknown function                                                          | YKL094w | orf19.12328 |
| CA3534 | SSB1         | -1.1 | 1.0  | -1.1 | -1.2 | heat shock protein 70                                                     | YNL209w | orf19.6367  |
| CA2825 | HWP1         | 1.1  | -1.1 | -1.2 | -1.3 | Hyphal wall protein                                                       |         | orf19.1321  |
| CA4361 | IPF16104     | -1.1 | -1.1 | -1.2 | -1.3 | unknown function                                                          | YJR119c | orf19.13096 |
| CA4869 | LYS4         | -1.1 | -1.1 | -1.3 | -1.3 | homoaconitate hydratase                                                   | YDR234w | orf19.3846  |
| CA2415 | MSD1         | -1.4 | -1.2 | -1.5 | -1.3 | Aspartyl-tRNA synthetase, mitochondrial.                                  | YPL104w | orf19.4478  |
| CA4076 | IPF2542      | -1.1 | -1.3 | -1.3 | -1.3 | putative neutral sphingomyelinase (by homology)                           | YER019w | orf19.6629  |
| CA0756 | IPF14859     | 1.1  | -1.6 | -1.6 | -1.3 | acyl-coenzyme-A dehydrogenase (by homology)                               |         | orf19.3488  |
| CA4113 | CHO1         | 1.4  | -1.3 | -1.2 | -1.3 | Phosphatidylserine synthase                                               | YER026c | orf19.677   |
| CA1150 | RIM9         | -1.1 | -1.4 | -1.6 | -1.3 | regulator for sporulation and invasive growth                             |         | orf19.101   |
| CA1503 | RKI1         | 1.1  | -1.6 | -1.4 | -1.3 | D-ribose-5-phosphate ketol-isomerase (by homology)                        | YOR095c | orf19.9268  |
| CA2559 | HIS4         | -1.3 | -1.2 | -1.3 | -1.3 | Histidine biosynthesis trifunctional protein (phosphoribosyl transferase) | YCL030c | orf19.5639  |
| CA4459 | NSP49.3F     | -1.2 | -1.2 | -1.3 | -1.3 | nucleoporin, 3-prime end (by homology)                                    | YGL092w | orf19.6856  |
| CA0025 | IPF17945     | -1.0 | -1.4 | -1.3 | -1.3 | unknown function                                                          |         | orf19.178   |
| CA5524 | IPF2861      | -1.1 | -1.3 | -1.3 | -1.3 | putative pyruvate dehydrogenase kinase                                    | YIL042c | orf19.7281  |
| CA3304 | RPL82        | -1.1 | -1.3 | -1.5 | -1.3 | 60S ribosomal protein L7a.e.B (by homology)                               |         | orf19.2311  |
| CA3808 | FAL1         | -1.0 | -1.1 | -1.3 | -1.3 | ATP-dependent RNA helicase                                                | YDR021w | orf19.2488  |

|        |             |      |      |      |      |                                                                            |         |             |
|--------|-------------|------|------|------|------|----------------------------------------------------------------------------|---------|-------------|
| CA3498 | RBK1        | -1.1 | -1.3 | -1.4 | -1.3 | Ribokinase (by homology)                                                   | YCR036w | orf19.6344  |
| CA2320 | SER1        | -1.1 | -1.3 | -1.3 | -1.3 | phosphoserine transaminase (by homology)                                   | YOR184w | orf19.5484  |
| CA1973 | WRS1        | -1.2 | -1.3 | -1.5 | -1.3 | tryptophan--tRNA ligase                                                    | YOL097c | orf19.5226  |
| CA1044 | RNA1        | -1.2 | -1.4 | -1.4 | -1.3 | GTPase activating protein (by homology)                                    | YMR235c | orf19.9218  |
| CA2656 | NAM2        | -1.1 | -1.3 | -1.5 | -1.3 | mitochondrial leucine--tRNA ligase (by homology)                           | YLR382c | orf19.5705  |
| CA1748 | IPF8257     | -1.2 | -1.1 | -1.6 | -1.3 | unknown function                                                           |         | orf19.1522  |
| CA4572 | KES1        | -1.3 | -1.2 | -1.5 | -1.3 | involved in ergosterol biosynthesis (by homology)                          | YPL145c | orf19.6883  |
| CA1869 | IPF15822    | -1.3 | -1.6 | -1.4 | -1.3 | unknown function                                                           |         | orf19.9993  |
| CA0095 | ALG11       | -1.1 | -1.4 | -1.4 | -1.3 | required for asparagine-linked oligosaccharide assembly                    | YNL048w | orf19.3468  |
| CA5099 | PRP8        | 1.1  | -1.1 | -1.4 | -1.3 | U5 snRNP protein, pre-mRNA splicing factor (by homology)                   | YHR165c | orf19.6442  |
| CA4331 | IPF2086     | -1.1 | -1.2 | -1.5 | -1.3 | unknown function                                                           | YOR057w | orf19.4089  |
| CA3273 | IPF12227.5F | -1.2 | -1.2 | -1.4 | -1.3 | unknown function, 5-prime end                                              |         | orf19.6307  |
| CA6128 | IPF152      | -1.2 | -1.3 | -1.5 | -1.3 | unknown function                                                           | YOR129c | orf19.5919  |
| CA1705 | GCN5        | 1.1  | -1.1 | 1.0  | -1.3 | Histone acetyltransferase (by homology)                                    | YGR252w | orf19.705   |
| CA4117 | LAB5        | -1.0 | -1.5 | -1.6 | -1.3 | lipoic acid synthase (by homology)                                         | YOR196c | orf19.2774  |
| CA0087 | SMF11       | -1.1 | -1.2 | -1.1 | -1.3 | manganese transporter (by homology)                                        |         | orf19.4690  |
| CA2406 | AIP2        | -1.2 | -1.2 | -1.3 | -1.3 | actin interacting protein 2 (by homology)                                  | YDL178w | orf19.300   |
| CA2821 | CDR3.3EOC   | 1.1  | -1.1 | -1.2 | -1.3 | Opaque-specific ABC transporter, 3-prime end                               |         |             |
| CA0504 | IPF16466    | -1.2 | -1.1 | -1.5 | -1.3 | unknown function                                                           | YKL014c | orf19.2778  |
| CA3186 | ILS1        | -1.3 | -1.0 | -1.5 | -1.3 | isoleucyl-tRNA synthetase (by homology)                                    | YBL076c | orf19.2138  |
| CA0627 | HSP12       | 1.5  | -1.6 | -1.8 | -1.3 | Heat shock protein (by homology)                                           | YFL014w | orf19.3160  |
| CA0862 | CRK1.5F     | -1.1 | -1.1 | -1.7 | -1.3 | Protein kinase, 5-prime end                                                | YPR161c | orf19.3524  |
| CA2881 | RAD4        | -1.1 | -1.2 | -1.3 | -1.3 | Excision repair protein (by homology)                                      | YOR206w | orf19.5850  |
| CA5021 | YST1.EXON2  | -1.1 | -1.3 | -1.3 | -1.3 | Ribosomal protein, exon 2                                                  | YGR214w | orf19.6975  |
| CA1246 | IMH3.EXON1  | -1.3 | -1.2 | -1.1 | -1.3 | IMP dehydrogenase, exon 1                                                  |         | orf19.19    |
| CA2250 | MIS11       | -1.0 | -1.3 | -1.3 | -1.3 | mitochondrial C1-tetrahydrofolate synthase precursor (by homology)         | YBR084w | orf19.2364  |
| CA5222 | IPF3079     | -1.1 | -1.2 | -1.2 | -1.3 | similar to <i>Saccharomyces cerevisiae</i> Pta1p pre-tRNA processing       | YAL043c | orf19.7041  |
| CA3191 | IPF11601    | -1.1 | -1.2 | -1.0 | -1.3 | unknown function                                                           | YOR165w | orf19.2151  |
| CA1750 | IPF8252     | -1.2 | -1.2 | -1.8 | -1.3 | unknown function                                                           |         | orf19.1519  |
| CA0088 | IPF7349     | -1.3 | -1.2 | -1.6 | -1.3 | similar to <i>Saccharomyces cerevisiae</i> Fol1p dihydroneopterin synthase | YNL256w | orf19.579   |
| CA3414 | IPF9240     | 1.1  | -1.3 | -1.4 | -1.3 | probable permease                                                          |         | orf19.6141  |
| CA0870 | IPP1        | 1.4  | -1.1 | -1.0 | -1.3 | inorganic pyrophosphatase (by homology)                                    | YBR011c | orf19.3590  |
| CA2319 | GUF1        | -1.2 | -1.3 | -1.3 | -1.3 | GTP-binding protein (by homology)                                          | YLR289w | orf19.5483  |
| CA2577 | IPF7430     | -1.1 | -1.1 | -1.3 | -1.3 | unknown function                                                           | YGR134w | orf19.6220  |
| CA3284 | ADE6        | -1.2 | -1.0 | -1.3 | -1.3 | 5-phosphoribosylformyl glycinamide synthetase (by homology)                | YGR061c | orf19.6317  |
| CA4450 | IPF3518     | -1.5 | -1.2 | -1.5 | -1.3 | similar to <i>Saccharomyces cerevisiae</i> Vps16p vacuolar sorting protein | YPL045w | orf19.6848  |
| CA2413 | IPF13756.5F | -1.5 | -1.4 | -1.7 | -1.3 | unknown function, 5-prime end                                              |         | orf19.4480  |
| CA2195 | IPF18517.3F | -1.4 | -1.2 | -1.4 | -1.3 | unknown function, 3-prime end                                              | YOL070c | orf19.11826 |
| CA2030 | IPF13116    | -1.1 | -1.3 | -1.3 | -1.3 | unknown function                                                           | YGL099w | orf19.3463  |
| CA6163 | POL1        | -1.2 | -1.0 | -1.3 | -1.3 | DNA-directed DNA polymerase alpha (by homology)                            | YNL102w | orf19.5873  |
| CA5938 | IPF3481     | -1.2 | -1.2 | -1.6 | -1.3 | unknown function                                                           |         | orf19.6759  |
| CA5006 | IPF12584    | 1.1  | -1.3 | -1.4 | -1.3 | unknown function                                                           | YCR033w | orf19.5241  |
| CA3367 | IPF4667     | -1.2 | -1.9 | -2.5 | -1.3 | unknown function                                                           | YDR380w | orf19.9405  |
| CA2712 | SPE2        | 1.0  | -1.2 | -1.1 | -1.3 | by homology to <i>S. cerevisiae</i> adenosylmethionine decarboxylase       | YOL052c | orf19.8199  |
| CA5568 | ELF1        | -1.3 | -1.2 | -1.5 | -1.3 | Elongation-like factor                                                     | YPL226w | orf19.7332  |
| CA5510 | IPF741      | -1.0 | -1.1 | -1.2 | -1.3 | unknown function                                                           | YNL313c | orf19.5356  |
| CA3423 | IPF3549     | 1.1  | -1.3 | -1.1 | -1.3 | unknown function                                                           |         | orf19.597   |
| CA1587 | CMP2        | -1.2 | -1.2 | -1.5 | -1.3 | Calcineurin B, catalytic subunit (by homology)                             | YML057w | orf19.6033  |
| CA1558 | IPF15679    | 1.0  | -1.5 | -1.5 | -1.3 | lipid transfer protein (by homology)                                       |         | orf19.1709  |

|        |            |      |      |      |      |                                                                |         |             |
|--------|------------|------|------|------|------|----------------------------------------------------------------|---------|-------------|
| CA5242 | PDX1       | -1.3 | -1.1 | -1.4 | -1.3 | Pyruvate dehydrogenase complex protein X (by homolo            | YGR193c | orf19.5021  |
| CA0667 | TIF5       | -1.2 | -1.4 | -1.3 | -1.3 | Translation initiation factor eIF5 (by homology)               | YPR041w | orf19.11737 |
| CA1428 | MRP4       | -1.3 | -1.5 | -1.4 | -1.3 | Ribosomal protein of the small subunit mitochondrial (b        | YHL004w | orf19.13170 |
| CA1156 | RLR1       | -1.2 | -1.2 | -1.5 | -1.3 | hypothetical regulatory protein (by homology)                  | YNL139c | orf19.4123  |
| CA5004 | TRP3       | -1.2 | -1.2 | -1.2 | -1.3 | Anthranilate synthase / indole glycerol phosphate synth        | YKL211c | orf19.5243  |
| CA0140 | MDM1.3     | -1.2 | -1.3 | -1.4 | -1.3 | intermediate filament protein, 3-prime end (by homology)       | YML104c | orf19.10097 |
| CA5796 | GLO3       | -1.2 | -1.2 | -1.4 | -1.3 | zinc finger protein                                            | YER122c | orf19.5445  |
| CA5582 | ADK2       | 1.1  | -1.6 | -1.8 | -1.3 | adenylate kinase, mitochondrial (by homology)                  | YER170w | orf19.7118  |
| CA5274 | IPF1764    | 1.2  | -1.5 | -1.3 | -1.3 | similar to <i>Saccharomyces cerevisiae</i> Gup1p glycerol tra  | YGL084c | orf19.4985  |
| CA4039 | SKS1       | -1.5 | -1.1 | -1.5 | -1.3 | serine/threonine kinase by homology                            | YPL026c | orf19.3669  |
| CA3214 | PUT3       | -1.1 | -1.4 | -1.4 | -1.3 | putative positive activator of the proline utilisation pathw   | YKL015w | orf19.6203  |
| CA0102 | IPF16695   | -1.3 | -1.1 | -1.5 | -1.3 | unknown function                                               | YCR081w | orf19.736   |
| CA4060 | GRS1       | -1.8 | -1.4 | -1.5 | -1.3 | glycine-tRNA ligase (by homology)                              | YBR121c | orf19.437   |
| CA5424 | IPF1598    | -1.3 | -1.3 | -1.6 | -1.3 | unknown function                                               | YDL074c | orf19.976   |
| CA0864 | CYT1       | -1.3 | -1.5 | -1.4 | -1.3 | cytochrome-c1 (by homology)                                    | YOR065w | orf19.3527  |
| CA2720 | IPF7366    | -1.3 | -1.2 | -1.2 | -1.3 | Arginyl-tRNA synthetase                                        | YDR341c | orf19.3341  |
| CA5119 | IPF1320    | -1.4 | -1.1 | -1.4 | -1.3 | unknown function                                               | YLR386w | orf19.6411  |
| CA1242 | IPF19908   | 1.1  | -1.4 | -1.4 | -1.3 | unknown function                                               |         | orf19.1344  |
| CA5105 | PEX19      | 1.0  | -1.4 | -1.4 | -1.3 | Required for biogenesis of peroxisomes (by homology)           | YDL065c | orf19.6434  |
| CA0012 | IPF19448   | -1.2 | -1.2 | -1.2 | -1.3 | similar to <i>Saccharomyces cerevisiae</i> Lro1p lecithin chol | YNR008w | orf19.13439 |
| CA2813 | ORC1       | -1.1 | -1.2 | -1.6 | -1.3 | Origin recognition complex protein 1                           | YML065w | orf19.10518 |
| CA2291 | IPF9740    | -1.2 | -1.4 | -1.6 | -1.3 | oligo-1,4 -1,4-glucontransferase / amylo-1,6-glucoSIDAS        | YPR184w | orf19.744   |
| CA0596 | IPF9706    | -1.0 | -1.3 | -1.5 | -1.3 | unknown function                                               | YBR203w | orf19.12346 |
| CA5605 | SNF31      | 1.1  | -1.4 | -1.5 | -1.3 | high-affinity glucose transporter (by homology)                |         | orf19.7094  |
| CA1755 | PDI1       | -1.1 | -1.2 | -1.7 | -1.3 | protein disulfide-isomerase precursor (by homology)            | YCL043c | orf19.5130  |
| CA5701 | ISW2       | -1.2 | -1.4 | -1.4 | -1.3 | Chromatin remodeling complex (by homology)                     | YOR304w | orf19.7401  |
| CA4385 | CCT6       | -1.4 | -1.2 | -1.4 | -1.3 | component of chaperonin-containing T-complex (zeta st          | YDR188w | orf19.3126  |
| CA0249 | IPF19617   | -1.1 | -1.3 | -1.4 | -1.3 | unknown function                                               |         | orf19.1350  |
| CA2708 | RPS6A      | -1.2 | -1.5 | -1.7 | -1.3 | ribosomal protein S6 (by homology)                             | YPL090c | orf19.4660  |
| CA2697 | IPF9167    | -1.3 | -1.2 | -1.3 | -1.3 | unknown function                                               | YDR109c | orf19.2737  |
| CA4711 | PHB1       | -1.0 | -1.3 | -1.3 | -1.3 | Prohibitin, antiproliferative protein (by homology)            | YGR132c | orf19.6944  |
| CA1239 | HSP60      | -1.2 | -1.3 | -1.3 | -1.3 | Heat Shock Protein 60 (HSP60)                                  | YLR259c | orf19.717   |
| CA5682 | NOG1       | -1.3 | -1.2 | -1.4 | -1.3 | Nucleolar G-protein (by homology)                              | YPL093w | orf19.7384  |
| CA3171 | IPF7681    | -1.0 | -1.2 | -1.4 | -1.3 | unknown function                                               |         | orf19.1397  |
| CA6052 | IPF4942    | -1.2 | -1.5 | -1.5 | -1.3 | similar to <i>Saccharomyces cerevisiae</i> Mal32p alpha-gluc   | YBR299w | orf19.7668  |
| CA4892 | PRT1       | -1.2 | -1.3 | -1.5 | -1.3 | Translation initiation factor eIF3 (by homology)               | YOR361c | orf19.6584  |
| CA5695 | IPF3310    | -1.1 | -1.2 | -1.5 | -1.3 | unknown function                                               | YPR022c | orf19.7397  |
| CA1291 | IPF16752   | -1.5 | -1.2 | -1.4 | -1.3 | unknown function                                               | YGR200c | orf19.2711  |
| CA5564 | IPF1980    | -1.2 | -1.2 | -1.5 | -1.3 | unknown function                                               |         | orf19.7328  |
| CA3909 | CIT1.EXON2 | -1.0 | -1.0 | -1.2 | -1.3 | Citrate synthase, exon 2                                       | YNR001c | orf19.4393  |
| CA2668 | IPF17553   | -1.2 | -1.4 | -1.5 | -1.3 | similar to <i>Saccharomyces cerevisiae</i> Pex2p peroxisoma    | YJL210w | orf19.3546  |
| CA1172 | RGT1       | -1.3 | -1.4 | -1.3 | -1.3 | Regulator of glucose-induced genes (by homology)               | YKL038w | orf19.2747  |
| CA2728 | IPF10322   | 1.0  | -1.5 | -1.5 | -1.3 | putative mitochondrial carrier protein (by homology)           | YHR002w | orf19.9665  |
| CA5262 | IPF1804    | -1.3 | -1.4 | -1.5 | -1.3 | putative transcription factor (by homology)                    | YGL166w | orf19.5001  |
| CA5292 | IPF1948    | -1.0 | -1.4 | -1.4 | -1.3 | unknown function                                               | YJL069c | orf19.7154  |
| CA5902 | SRP68      | -1.4 | -1.6 | -1.8 | -1.3 | SIGNAL RECOGNITION PARTICLE 68 (by homology)                   | YPL243w | orf19.6804  |
| CA2141 | IPF19664   | -1.4 | -1.3 | -1.5 | -1.3 | unknown function                                               |         | orf19.10047 |
| CA5108 | SKI2       | -1.1 | -1.2 | -1.3 | -1.3 | Antiviral protein and putative helicase                        | YLR398c | orf19.6425  |
| CA5621 | FRE7       | -1.0 | -1.5 | -1.4 | -1.3 | Ferric reductase transmembrane component (by homolo            | YOL152w | orf19.7077  |



|        |              |      |      |      |      |                                                                                           |         |             |
|--------|--------------|------|------|------|------|-------------------------------------------------------------------------------------------|---------|-------------|
| CA5296 | IPF1956      | 1.0  | -1.3 | -1.7 | -1.3 | unknown function                                                                          | YMR185w | orf19.7159  |
| CA0300 | ERG24        | 1.1  | -1.3 | -1.3 | -1.3 | C-14 sterol reductase (by homology)                                                       | YNL280c | orf19.1598  |
| CA4808 | RFA1         | -1.6 | -1.2 | -1.4 | -1.3 | DNA replication factor A, 69 KD subunit (by homology)                                     | YAR007c | orf19.2093  |
| CA3754 | TIF3         | -1.2 | -1.1 | -1.5 | -1.3 | translation initiation factor eIF4B (by homology)                                         | YPR163c | orf19.3423  |
| CA0919 | POR1         | 1.6  | -1.4 | -1.3 | -1.3 | mitochondrial outer membrane porin (by homology)                                          | YNL055c | orf19.1042  |
| CA0706 | IPF7715      | -1.0 | -1.1 | -1.6 | -1.3 | unknown function                                                                          |         | orf19.8300  |
| CA3384 | IPF8362      | -1.2 | -1.2 | -1.7 | -1.3 | similar to <i>Saccharomyces cerevisiae</i> Cft2p involved in c                            | YLR115w | orf19.325   |
| CA4312 | IPF2122      | -1.2 | -1.3 | -1.3 | -1.3 | similar to thiamin pyrophosphokinase                                                      | YJR142w | orf19.4112  |
| CA2974 | IPF12540     | 1.1  | -1.5 | -1.6 | -1.3 | unknown function                                                                          |         | orf19.8824  |
| CA4857 | PHR1         | -1.2 | -1.4 | -1.5 | -1.3 | GPI-anchored pH responsive glycosyl transferase                                           |         | orf19.3829  |
| CA4209 | DEP1.3F      | -1.5 | -1.2 | -1.8 | -1.3 | Regulator of phospholipid metabolism, 3-prime end (by                                     | YAL013w | orf19.8427  |
| CA2035 | SGD1.5F      | -1.2 | -1.3 | -1.4 | -1.3 | Involved in HOG pathway, 5-prime end                                                      | YLR336c | orf19.11841 |
| CA1759 | IPF14744     | -1.2 | -1.5 | -1.5 | -1.3 | unknown function                                                                          | YLR149c | orf19.5125  |
| CA2682 | FRS1         | -1.3 | -1.3 | -1.4 | -1.3 | Phenylalanyl-tRNA synthetase                                                              | YLR060w | orf19.2573  |
| CA4772 | CCT3         | -1.0 | -1.4 | -1.5 | -1.3 | Chaperonin (by homology)                                                                  | YJL014w | orf19.4004  |
| CA3042 | ARC1         | -1.1 | -1.4 | -1.6 | -1.3 | G4 nucleic acid binding protein (by homology)                                             | YGL105w | orf19.2422  |
| CA1324 | IPF6676      | 1.4  | -1.4 | -1.2 | -1.3 | polytopic membrane protein involved in drug transport (I                                  | YBR293w | orf19.1308  |
| CA0193 | IPF6493      | 1.0  | -1.2 | -1.5 | -1.3 | unknown function                                                                          |         | orf19.1541  |
| CA5686 | IPF3329      | -1.1 | -1.2 | -1.3 | -1.3 | similar to <i>Saccharomyces cerevisiae</i> Pbs2p tyrosine pr                              | YJL128c | orf19.7388  |
| CA1061 | PF19720.3EOC | 1.0  | -1.2 | -1.8 | -1.3 | unknown function, 3-prime end                                                             |         | orf19.12113 |
| CA0470 | YPT32        | -1.1 | -1.4 | -1.6 | -1.3 | small GTP-binding protein essential for Golgi function (t                                 | YER031c | orf19.2622  |
| CA0225 | NUP84        | -1.3 | -1.3 | -1.3 | -1.3 | nuclear pore protein (by homology)                                                        | YDL116w | orf19.1298  |
| CA5309 | IPF2170      | -1.3 | -1.3 | -1.5 | -1.3 | similar to <i>saccharomyces cerevisiae</i> Ssc1pmitochondrial hsp70-type heat shock prote |         | orf19.7179  |
| CA1283 | PF10171.EXON | 1.1  | -1.1 | -1.1 | -1.3 | unknown function, exon 1                                                                  |         | orf19.644   |
| CA0879 | IPF19542.5F  | 1.2  | -1.3 | -1.4 | -1.3 | unknown function, 5-prime end                                                             |         | orf19.8003  |
| CA1938 | NMD5         | -1.5 | -1.3 | -1.3 | -1.3 | putative Nam7p/Upf1p-interacting protein (by homology)                                    | YJR132w | orf19.4188  |
| CA6139 | ADE2         | -1.1 | -1.1 | -1.3 | -1.3 | phosphoribosylaminoimidazole carboxylase                                                  | YOR128c | orf19.5906  |
| CA0480 | IPF8610      | 1.0  | -1.6 | -1.5 | -1.3 | permease (by homology)                                                                    |         | orf19.2633  |
| CA5828 | CRM1         | -1.7 | -1.3 | -1.6 | -1.3 | Nuclear export factor                                                                     | YGR218w | orf19.7483  |
| CA5638 | IPF470       | -1.3 | -1.2 | -1.5 | -1.3 | putative glutamine-tRNA ligase (by homology)                                              | YGL245w | orf19.7057  |
| CA4658 | IPF3092      | -1.2 | -1.8 | -2.1 | -1.3 | unknown function                                                                          |         | orf19.4445  |
| CA1766 | NOP4         | -1.1 | -1.3 | -1.5 | -1.4 | Nucleolar protein                                                                         | YPL043w | orf19.5198  |
| CA1408 | IPF10513     | 1.1  | -1.6 | -1.5 | -1.4 | unknown function                                                                          |         | orf19.2883  |
| CA3667 | IPF16323     | -1.4 | -1.8 | -2.1 | -1.4 | similar to <i>Saccharomyces cerevisiae</i> Pex1p peroxisoma                               | YKL197c | orf19.6460  |
| CA2033 | SEC27        | -1.5 | -1.3 | -1.7 | -1.4 | coatomer complex beta chain (beta -cop) of secretory p                                    | YGL137w | orf19.10971 |
| CA0204 | IKI3         | -1.2 | -1.3 | -1.7 | -1.4 | killer toxin insensitive protein 3 (by homology)                                          | YLR384c | orf19.1222  |
| CA4169 | RSC2         | -1.3 | -1.1 | -1.4 | -1.4 | Member of RSC complex, which remodels the structure                                       | YGR056w | orf19.2964  |
| CA5184 | PF11090.EXON | -1.2 | -1.2 | -1.5 | -1.4 | weak similarity to glutenin, exon 2                                                       |         |             |
| CA4201 | IPF8048      | 1.1  | -1.5 | -1.4 | -1.4 | probable succinate-semialdehyde dehydrogenase (by homology)                               |         | orf19.4543  |
| CA2109 | IPF13749.5F  | -1.1 | -1.4 | -1.3 | -1.4 | unknown function, 5-prime end                                                             | YLR345w | orf19.3690  |
| CA3601 | IPF15618     | -1.3 | -1.3 | -1.7 | -1.4 | cysteinyl-tRNA synthetase (by homology)                                                   | YNL247w | orf19.4931  |
| CA2796 | IPF8405      | 1.3  | -1.4 | -1.4 | -1.4 | similar to <i>Saccharomyces cerevisiae</i> Nce103p involved                               | YNL036w | orf19.1721  |
| CA5362 | IPF836.3     | -1.2 | -1.4 | -1.5 | -1.4 | regulation of G-protein function, 3-prime end (by homol                                   | YHR146w | orf19.7239  |
| CA3631 | TIM54        | -1.1 | -1.4 | -1.4 | -1.4 | Translocase for the insertion of proteins into the mitoch                                 | YJL054w | orf19.12608 |
| CA4428 | IFM1         | -1.2 | -1.3 | -1.6 | -1.4 | translation initiation factor 2 by homology                                               | YOL023w | orf19.5167  |
| CA5316 | MAM33        | 1.3  | -1.5 | -1.4 | -1.4 | Mitochondrial acidic matrix protein (by homology)                                         | YIL070c | orf19.7187  |
| CA4005 | ERG6         | 1.2  | -1.5 | -1.4 | -1.4 | sterol transmethylase                                                                     | YML008c | orf19.1631  |
| CA2162 | PDB1         | -1.2 | -1.8 | -1.4 | -1.4 | pyruvate dehydrogenase (by homology)                                                      | YBR221c | orf19.5294  |
| CA0003 | IPF19484     | -1.5 | -1.4 | -1.6 | -1.4 | putative zinc amino peptidase (by homology)                                               |         |             |

|        |              |      |      |      |      |                                                                                          |                       |
|--------|--------------|------|------|------|------|------------------------------------------------------------------------------------------|-----------------------|
| CA1830 | IPF17177.5F  | -1.3 | 1.0  | -1.2 | -1.4 | similar to <i>Saccharomyces cerevisiae</i> Srm1p regulator of chromosome condensation, 1 | orf19.5185            |
| CA5889 | IPF2409      | -1.1 | -1.4 | -1.7 | -1.4 | RNA-dependent ATPase (by homology)                                                       | YLR419w<br>orf19.6818 |
| CA1557 | IPF15677     | -1.2 | -1.4 | -1.6 | -1.4 | probable NADH-ubiquinone oxidoreductase (by homology)                                    | orf19.1710            |
| CA3288 | ARD8         | 1.1  | -1.2 | -1.1 | -1.4 | D-arabinitol dehydrogenase                                                               | orf19.6322            |
| CA4783 | IPF3358      | -1.1 | -1.3 | -1.6 | -1.4 | ubiquinol-cytochrome-c reductase (by homology)                                           | YBL045c<br>orf19.4016 |
| CA5023 | IPF7547      | 1.1  | -1.4 | -1.4 | -1.4 | unknown function                                                                         | YJL163c<br>orf19.6976 |
| CA0895 | SHM2         | -1.2 | -1.5 | -1.5 | -1.4 | Serine hydroxymethyltransferase precursor,                                               | YLR058c<br>orf19.5750 |
| CA3546 | ACO1         | 1.2  | 1.1  | -1.1 | -1.4 | aconitate hydratase (by homology)                                                        | YLR304c<br>orf19.6385 |
| CA5027 | IPF2999      | -1.5 | -1.3 | -1.6 | -1.4 | unknown function                                                                         | YKR051w<br>orf19.6981 |
| CA4505 | NOP2         | -1.3 | -1.1 | -1.3 | -1.4 | nucleolar protein (by homology)                                                          | YNL061w<br>orf19.501  |
| CA4684 | HSP78.5F     | -1.3 | -1.1 | -1.6 | -1.4 | heat shock protein of clpb family of ATP-dependent proteases, mitochondrial, 5-prime     | orf19.882             |
| CA0433 | SHM1         | -1.3 | -1.4 | -1.6 | -1.4 | Serine hydroxymethyltransferase precursor, mitochondr                                    | YBR263w<br>orf19.1342 |
| CA2442 | PRS5         | -1.1 | -1.3 | -1.3 | -1.4 | Phosphoribosylpyrophosphate synthetase (ribose-phos                                      | YOL061w<br>orf19.2193 |
| CA5947 | KRS1         | -1.4 | -1.2 | -1.4 | -1.4 | Lysyl-tRNA synthetase (by homology)                                                      | YDR037w<br>orf19.6749 |
| CA0741 | IPF3261      | -1.1 | -1.2 | -1.4 | -1.4 | unknown function                                                                         | YPL105c<br>orf19.3141 |
| CA5164 | MDH1         | 1.2  | -1.4 | -1.4 | -1.4 | Mitochondrial malate dehydrogenase precursor (by hom                                     | YKL085w<br>orf19.4602 |
| CA5183 | PF11090.EXON | -1.2 | -1.2 | -1.9 | -1.4 | weak similarity to glutenin, exon 1                                                      | YKL054c<br>orf19.4622 |
| CA4928 | IPF1399      | -1.2 | -1.5 | -1.4 | -1.4 | unknown function                                                                         | YDR346c<br>orf19.6068 |
| CA4542 | IPF6255      | -1.3 | -1.4 | -1.5 | -1.4 | unknown function                                                                         | YHR074w<br>orf19.1460 |
| CA4667 | GAP5         | 1.1  | -1.4 | -1.2 | -1.4 | General amino acid permease (by homology)                                                | orf19.4456            |
| CA0446 | IPF14282     | 1.2  | 1.0  | -1.8 | -1.4 | Similar to mucin proteins (by homology)                                                  | orf19.2296            |
| CA3901 | IPF3282.3EOC | 1.1  | -1.7 | -1.6 | -1.4 | hexose transporter, 3-prime end (by homology)                                            |                       |
| CA0781 | CAR1.3EOC    | 1.1  | -1.4 | -1.7 | -1.4 | arginase, 3-prime end (by homology)                                                      | orf19.11416           |
| CA3016 | IPF10027     | -1.2 | -1.4 | -1.7 | -1.4 | unknown function                                                                         | orf19.11396           |
| CA1127 | MSH3         | -1.5 | -1.5 | -1.5 | -1.4 | DNA mismatch repair by homology                                                          | YCR092c<br>orf19.3608 |
| CA1758 | IPF14559.3F  | -1.0 | -1.4 | -1.4 | -1.4 | unknown function, 3-prime end                                                            | YCL037c<br>orf19.5126 |
| CA1592 | IPF14662     | 1.6  | -1.7 | -1.4 | -1.4 | D-xylose reductase (by homology)                                                         | YHR104w<br>orf19.4317 |
| CA1797 | NUM12        | -1.2 | -1.0 | -1.8 | -1.4 | nuclear migration protein (by homology)                                                  | orf19.2924            |
| CA4864 | IPF4087      | -1.1 | -1.4 | -1.8 | -1.4 | similar to <i>Saccharomyces cerevisiae</i> Pak1p protein kin                             | YER129w<br>orf19.3840 |
| CA3212 | MEF2         | -1.1 | -1.4 | -1.3 | -1.4 | translation elongation factor (by homology)                                              | YJL102w<br>orf19.6208 |
| CA2884 | IPF7201      | -1.4 | -1.2 | -1.9 | -1.4 | similar to <i>Saccharomyces cerevisiae</i> Ecm5p involved in                             | YMR176w<br>orf19.2476 |
| CA3121 | GGA1         | -1.4 | -1.3 | -1.5 | -1.4 | Arf-binding protein                                                                      | YHR108w<br>orf19.3006 |
| CA0048 | TIF4631      | 1.0  | -1.2 | -1.5 | -1.4 | mRNA cap-binding protein (by homology)                                                   | YGR162w<br>orf19.3599 |
| CA1954 | IPF3897.5F   | -1.3 | -1.1 | -1.7 | -1.4 | unknown function, 5-prime end                                                            | YGL083w<br>orf19.764  |
| CA2150 | IPF19940     | -1.2 | -1.4 | -1.4 | -1.4 | unknown function                                                                         | orf19.6022            |
| CA0987 | RPB140       | -1.2 | -1.2 | -1.9 | -1.4 | DNA-dependent RNA polymerase II RPB140                                                   | YOR151c<br>orf19.3349 |
| CA2297 | ERG4         | 1.5  | -1.7 | -1.2 | -1.4 | sterol C-24 reductase (by homology)                                                      | YGL012w<br>orf19.5379 |
| CA0914 | SRA1         | -1.7 | -1.4 | -1.6 | -1.4 | cAMP dependent protein kinase, regulatory subunit (by                                    | YIL033c<br>orf19.9565 |
| CA0167 | IPF19160     | -1.6 | -1.5 | -1.9 | -1.4 | unknown function                                                                         | orf19.1075            |
| CA3061 | IPF2965      | -1.1 | -1.5 | -1.7 | -1.4 | unknown function                                                                         | orf19.11763           |
| CA0615 | RPL3         | -1.2 | -1.3 | -1.5 | -1.4 | 60S large subunit ribosomal protein L3.e (by homology)                                   | YOR063w<br>orf19.1601 |
| CA0832 | IPF14225     | -1.1 | -1.6 | -1.5 | -1.4 | unknown function                                                                         | YDL133w<br>orf19.9244 |
| CA5288 | IPF1928      | -1.2 | -1.4 | -1.4 | -1.4 | unknown function                                                                         | YMR258c<br>orf19.7149 |
| CA1702 | HEL1         | -1.4 | -1.3 | -1.4 | -1.4 | DNA helicase I (by homology)                                                             | YER176w<br>orf19.702  |
| CA5525 | PEX13        | 1.0  | -1.9 | -1.7 | -1.4 | Peroxisome import protein - peroxin (by homology)                                        | YLR191w<br>orf19.7282 |
| CA0660 | IPF16189.5F  | -1.1 | -1.4 | -2.0 | -1.4 | panthotenate kinase, 5-prime end (by homology)                                           | YDR531w<br>orf19.5577 |
| CA2093 | IPF3406      | -1.2 | -1.2 | -1.4 | -1.4 | unknown function                                                                         | YKL179c<br>orf19.841  |
| CA2414 | IPF13756.3F  | -1.5 | -1.5 | -1.5 | -1.4 | unknown function, 3-prime end                                                            | YJL010c<br>orf19.4479 |
| CA5937 | IPF2784      | -1.2 | -1.2 | -2.0 | -1.4 | unknown function                                                                         | YER132c<br>orf19.6760 |

|        |               |      |      |      |      |                                                                                       |         |             |
|--------|---------------|------|------|------|------|---------------------------------------------------------------------------------------|---------|-------------|
| CA0445 | IPF17429.5F   | -1.6 | -1.3 | -1.8 | -1.4 | similar to <i>Saccharomyces cerevisiae</i> Sec5p required for exocytosis, 5-prime end |         | orf19.7725  |
| CA1879 | SMF12         | -1.1 | -1.5 | -1.5 | -1.4 | manganese transporter (by homology)                                                   | YOL122c | orf19.2270  |
| CA6060 | IPF8301       | -1.3 | -1.3 | -1.4 | -1.4 | unknown function                                                                      | YLL032c | orf19.6008  |
| CA0197 | IPF9787       | -1.3 | -1.6 | -1.9 | -1.4 | similar to <i>Saccharomyces cerevisiae</i> Hst3p silencing pr                         | YOR025w | orf19.1934  |
| CA3750 | IPF7377       | -1.2 | -1.4 | -1.8 | -1.4 | unknown function                                                                      |         | orf19.3428  |
| CA3479 | ATP4          | -1.2 | -1.4 | -1.6 | -1.4 | F1F0-ATPase complex, F0 subunit B (by homology)                                       | YPL078c | orf19.3579  |
| CA4981 | IPF2057       | -1.2 | -1.6 | -1.7 | -1.4 | unknown function                                                                      |         | orf19.5269  |
| CA3265 | ABP1          | -1.2 | -1.5 | -1.6 | -1.4 | actin-binding protein (by homology)                                                   | YCR088w | orf19.2699  |
| CA0343 | LYS1.5EOC     | -1.1 | -1.3 | -1.3 | -1.4 | saccharopine dehydrogenase, 5-prime end (by homology)                                 | YIR034c |             |
| CA4632 | IPF1531       | -1.2 | -1.3 | -1.8 | -1.4 | unknown function                                                                      | YMR196w | orf19.338   |
| CA4665 | IPF6548       | -1.3 | -1.2 | -1.6 | -1.4 | translation elongation factor eEF4 (by homology)                                      | YNL163c | orf19.4451  |
| CA4650 | ISW1.3        | -1.3 | -1.4 | -1.9 | -1.4 | ATPase component of a four subunit chromatin remode                                   | YBR245c | orf19.11916 |
| CA4457 | ATP1.EXON3    | -1.0 | -1.4 | -1.4 | -1.4 | F1F0-ATPase complex, F1 alpha subunit, exon 3                                         | YBL099w | orf19.6854  |
| CA0584 | GSH1.EXON1    | -1.9 | -1.3 | -2.1 | -1.4 | Gamma-glutamylcysteine synthetase, exon 1 (by homology)                               |         | orf19.12527 |
| CA0524 | CYT12         | -1.1 | -1.4 | -1.3 | -1.4 | cytochrome-c1 (by homology)                                                           |         | orf19.11011 |
| CA0108 | HIK1.5EOC     | -1.3 | -1.1 | -1.7 | -1.4 | histidine kinase, 5-prime end                                                         |         | orf19.5181  |
| CA4495 | IPF4059       | -1.4 | -1.5 | -1.5 | -1.4 | aldehyde dehydrogenase (by homology)                                                  | YHR039c | orf19.1865  |
| CA0223 | VAS1          | -1.6 | -1.5 | -1.8 | -1.5 | valyl-tRNA synthetase (by homology)                                                   | YGR094w | orf19.1295  |
| CA0265 | STI1          | -1.6 | -1.4 | -1.6 | -1.5 | stress-induced protein (by homology)                                                  | YOR027w | orf19.10702 |
| CA1873 | IPF6696       | 1.2  | -1.6 | -1.8 | -1.5 | unknown function                                                                      |         | orf19.9997  |
| CA4326 | IPF2093       | -1.2 | -1.3 | -1.5 | -1.5 | nuclear protein of unknown function (by homology)                                     | YGR103w | orf19.4093  |
| CA3174 | CCT2          | -1.4 | -1.2 | -1.4 | -1.5 | chaperonin of the TCP1 ring complex, cytosolic (by hom                                | YIL142w | orf19.1402  |
| CA2008 | PF1742.3F.EOC | -1.0 | -1.4 | -1.9 | -1.5 | unknown function, 3-prime end                                                         |         |             |
| CA0747 | SNF2          | -1.3 | -1.3 | -1.8 | -1.5 | component of SWI/SNF global transcription activator co                                | YOR290c | orf19.9102  |
| CA5955 | IPF3510       | -1.2 | -1.3 | -1.7 | -1.5 | unknown function                                                                      | YMR278w | orf19.6739  |
| CA0934 | IPF14203.3F   | -1.0 | -1.5 | -1.7 | -1.5 | similarity to several transaminases, 3-prime end (by homology)                        |         | orf19.1078  |
| CA1699 | RAM1.3F       | -1.3 | -1.4 | -1.6 | -1.5 | protein farnesyltransferase, beta subunit, 3-prime end (by homology)                  |         |             |
| CA4883 | IPF1649       | -1.6 | -1.1 | -2.0 | -1.5 | similar to <i>Saccharomyces cerevisiae</i> Bem2p GTPase- $\alpha$                     | YER155c | orf19.6573  |
| CA4054 | TRF4          | -1.2 | -1.3 | -1.4 | -1.5 | Topoisomerase I-related protein                                                       | YOL115w | orf19.429   |
| CA4993 | PXA2          | 1.0  | -1.7 | -1.8 | -1.5 | ABC transporter, peroxisomal (by homology)                                            | YKL188c | orf19.5255  |
| CA4294 | ERC1          | -1.0 | -1.4 | -1.6 | -1.5 | ethionine resistance protein (by homology)                                            | YHR032w | orf19.6691  |
| CA4875 | LAT1          | -1.4 | -1.4 | -1.7 | -1.5 | Dihydrolipoamide S-acetyltransferase (by homology)                                    | YNL071w | orf19.6561  |
| CA3175 | IPF11587      | -1.2 | -1.6 | -1.5 | -1.5 | unknown function                                                                      | YNL083w | orf19.1403  |
| CA4838 | YTA12         | -1.4 | -1.3 | -1.8 | -1.5 | Protease of the SEC18/CDC48/PAS1 family of ATPase:                                    | YMR089c | orf19.2057  |
| CA6009 | IPF643        | -1.1 | -1.5 | -1.9 | -1.5 | similar to <i>Saccharomyces cerevisiae</i> Ptp3p protein tyros                        | YER075c | orf19.7610  |
| CA1982 | ADK1          | -1.0 | -1.4 | -1.7 | -1.5 | adenylate kinase, cytosolic (by homology)                                             | YDR226w | orf19.683   |
| CA2060 | CDC61.3F      | -1.3 | -1.2 | -1.9 | -1.5 | Cytosolic leucyl-tRNA synthetase, 3-prime end                                         |         | orf19.2560  |
| CA3514 | IPF11245      | -1.3 | -1.4 | -2.1 | -1.5 | similar to <i>Saccharomyces cerevisiae</i> Spa2p involved in                          | YLL021w | orf19.6362  |
| CA4904 | RPO41         | -1.2 | -1.3 | -1.9 | -1.5 | Mitochondrial DNA-directed RNA polymerase (by homo                                    | YFL036w | orf19.6041  |
| CA1793 | IPF18608.5F   | -1.2 | -1.6 | -1.7 | -1.5 | unknown function, 5-prime end                                                         |         | orf19.5207  |
| CA5991 | IPF690.3F     | -1.4 | -1.3 | -1.6 | -1.5 | NADH dehydrogenase (ubiquinone) 78K chain precursor, 3-prime end (by homology)        |         | orf19.7591  |
| CA4954 | TOM40         | -1.3 | -1.3 | -1.4 | -1.5 | mitochondrial import receptor chain TOM40 (by homolo                                  | YMR203w | orf19.6524  |
| CA3499 | RPG1          | -1.5 | -1.3 | -1.9 | -1.5 | Translation initiation factor eIF3 (by homology)                                      | YBR079c | orf19.6345  |
| CA0245 | POL5          | -1.6 | -1.5 | -2.0 | -1.5 | DNA polymerase V (by homology)                                                        | YEL055c | orf19.13042 |
| CA2608 | THS1          | -1.7 | -1.3 | -1.4 | -1.5 | threonyl tRNA synthetase by homology                                                  | YIL078w | orf19.5685  |
| CA2899 | IPF17681      | -1.3 | -1.5 | -1.7 | -1.5 | similar to <i>Saccharomyces cerevisiae</i> Rsm23p involved i                          | YGL129c | orf19.3480  |
| CA1620 | MET10         | -1.3 | -1.6 | -1.9 | -1.5 | Sulfite reductase flavin-binding subunit (by homology)                                | YFR030w | orf19.4076  |
| CA4350 | FUM12.53F     | -1.1 | -1.6 | -2.2 | -1.5 | Fumarate hydratase, internal fragment (by homology)                                   |         |             |
| CA4412 | PDA1          | 1.1  | -1.0 | -1.5 | -1.5 | Pyruvate dehydrogenase alpha chain (by homology)                                      | YER178w | orf19.3097  |

|        |            |      |      |      |      |                                                                                              |         |             |
|--------|------------|------|------|------|------|----------------------------------------------------------------------------------------------|---------|-------------|
| CA3474 | AFG3       | -1.3 | -1.5 | -1.8 | -1.5 | Member of the Sec18p, Pas1p, Cdc48p, TBP-1 family o                                          | YER017c | orf19.1669  |
| CA2009 | IPF1732    | 1.3  | -1.4 | -1.4 | -1.5 | intramitochondrial protein sorting (by homology)                                             | YLR168c | orf19.3089  |
| CA2447 | HIS7       | -1.4 | -1.6 | -2.0 | -1.5 | Histidine biosynthesis                                                                       | YBR248c | orf19.5505  |
| CA1693 | IPF17054   | -1.0 | -1.7 | -1.8 | -1.5 | unknown function                                                                             |         | orf19.5037  |
| CA3771 | SOU1       | -1.0 | -1.6 | -1.7 | -1.5 | Sorbitol utilization protein Sou1p [ <i>Candida albicans</i> ]                               |         | orf19.2896  |
| CA4210 | DEP1.5F    | -1.4 | -1.3 | -2.0 | -1.5 | Regulator of phospholipid metabolism, 5-prime end (by homology)                              |         | orf19.8428  |
| CA4029 | IPF7171.5F | -1.3 | -1.5 | -1.9 | -1.5 | unknown function, 5-prime end                                                                | YGR067c | orf19.3434  |
| CA4504 | ARP5       | -1.3 | -1.2 | -1.8 | -1.5 | actin-related protein (by homology)                                                          | YNL059c | orf19.504   |
| CA4713 | CCC1       | 1.0  | -1.7 | -1.4 | -1.5 | Transmembrane Ca <sup>2+</sup> transporter (by homology)                                     | YLR220w | orf19.6948  |
| CA5154 | RGA2       | -1.2 | -1.2 | -1.8 | -1.5 | rho-GTPase activating protein 2 (by homology)                                                | YOR127w | orf19.4593  |
| CA1911 | SSE1       | -1.5 | -1.5 | -1.7 | -1.5 | heat shock protein of HSP70 family (by homology)                                             | YPL106c | orf19.2435  |
| CA0163 | AYR2       | 1.1  | -1.7 | -1.6 | -1.5 | 1-acyl dihydroxyacetone phosphate reductase (by homology)                                    |         | orf19.5615  |
| CA6127 | IPF149     | -1.1 | -1.7 | -1.7 | -1.5 | peroxisomal membrane protein (by homology)                                                   |         | orf19.5921  |
| CA2131 | IDP1       | 1.1  | -1.5 | -1.9 | -1.5 | isocitrate dehydrogenase, cytosolic (by homology)                                            |         | orf19.5211  |
| CA3994 | ERG7       | -1.1 | -1.5 | -1.6 | -1.5 | lanosterol synthase                                                                          | YHR072w | orf19.9143  |
| CA6149 | RIP1       | -1.5 | -1.5 | -1.7 | -1.5 | Ubiquinol cytochrome-c reductase (by homology)                                               | YEL024w | orf19.5893  |
| CA4077 | ACO2       | -1.2 | -1.1 | -1.6 | -1.6 | aconitate hydratase (by homology)                                                            | YJL200c | orf19.6632  |
| CA3990 | IPF14782   | 1.1  | -1.6 | -1.9 | -1.6 | beta-transducin (by homology)                                                                | YLR409c | orf19.1566  |
| CA5430 | IPF191     | 1.3  | -1.5 | -1.5 | -1.6 | putative permease (by homology)                                                              |         | orf19.3232  |
| CA1439 | IPF19602   | -1.6 | -1.6 | -1.9 | -1.6 | similar to <i>Saccharomyces cerevisiae</i> Swi3p transcriptior                               | YJL176c | orf19.4488  |
| CA2972 | MDL2.3F    | -1.5 | -1.3 | -1.6 | -1.6 | ATP-binding transporter, 3-prime end (by homology)                                           |         | orf19.5599  |
| CA1024 | CAR1       | 1.0  | -1.7 | -2.0 | -1.6 | arginase by homology                                                                         | YPL111w | orf19.3934  |
| CA5097 | IPF1382    | -1.1 | -1.4 | -1.2 | -1.6 | unknown function                                                                             | YHL023c | orf19.6444  |
| CA4243 | IPF16491   | -1.1 | -1.3 | -1.9 | -1.6 | unknown function                                                                             |         | orf19.529   |
| CA2538 | NAT1       | -1.6 | -1.4 | -1.8 | -1.6 | Protein N-acetyltransferase subunit (by homology)                                            | YDL040c | orf19.3185  |
| CA4966 | IPF3923    | -1.4 | -1.3 | -1.8 | -1.6 | unknown function                                                                             |         | orf19.6507  |
| CA4446 | ICL1       | -1.0 | -1.9 | -2.0 | -1.6 | Isocitrate lyase                                                                             | YER065c | orf19.6844  |
| CA2823 | IPF14554   | -1.3 | -1.5 | -1.8 | -1.6 | similar to <i>Saccharomyces cerevisiae</i> Osh3p oxysterol-b                                 | YHR073w | orf19.1317  |
| CA4301 | IPF2593    | -1.7 | -1.3 | -1.5 | -1.6 | amino acid-tRNA ligase homolog (by homology)                                                 | YHR020w | orf19.6701  |
| CA0255 | IPF16558.3 | -1.0 | -1.3 | -1.9 | -1.6 | putative transcription initiation factor, 3-prime end (by homology)                          |         | orf19.735   |
| CA3015 | IPF10029   | -1.4 | -1.8 | -1.8 | -1.6 | unknown function                                                                             | YFR044c | orf19.11397 |
| CA2169 | IPF4563.5F | -1.3 | 1.3  | -2.0 | -1.6 | similar to <i>saccharomyces cerevisiae</i> Tom1p E3 ubiquitin ligase required for G2/M trans |         | orf19.911   |
| CA6029 | DRS1       | -1.0 | -1.4 | -1.9 | -1.6 | ATP dependent RNA helicase (by homology)                                                     | YLL008w | orf19.7635  |
| CA1988 | IPF19749   | -1.1 | -1.7 | -1.8 | -1.6 | unknown function                                                                             |         | orf19.94    |
| CA2310 | LEU42      | -1.3 | -2.8 | -3.2 | -1.6 | 2-isopropylmalalate synthase (by homology)                                                   |         | orf19.1375  |
| CA3404 | MAL31      | 1.0  | -1.9 | -2.4 | -1.6 | maltose permease (by homology)                                                               | YBR298c | orf19.3981  |
| CA4474 | SSC1       | 1.4  | -1.1 | -1.2 | -1.6 | Mitochondrial heat shock protein 70-related protein (by I                                    | YJR045c | orf19.1896  |
| CA4909 | TUF1       | -1.1 | -1.3 | -1.3 | -1.6 | Translation elongation factor TU (by homology)                                               | YOR187w | orf19.6047  |
| CA2623 | PER3.EXON1 | -1.5 | -1.9 | -2.3 | -1.6 | peroxisomal import protein, exon 1 (by homology)                                             |         | orf19.10323 |
| CA1438 | NOP58      | -1.3 | -1.3 | -1.7 | -1.6 | nucleolar protein required for pre-18S rRNA processing                                       | YOR310c | orf19.1199  |
| CA4639 | IPF1509    | -1.1 | -1.7 | -1.9 | -1.6 | putative alanine transaminase (by homology)                                                  | YLR089c | orf19.346   |
| CA0030 | IPF17790   | -1.5 | -1.4 | -1.8 | -1.6 | unknown function                                                                             | YML091c | orf19.7710  |
| CA2269 | YOR100     | 1.2  | -1.8 | -2.0 | -1.6 | Putative mitochondrial carrier protein                                                       | YOR100c | orf19.2599  |
| CA4513 | ADE17      | -1.3 | -1.7 | -1.8 | -1.6 | 5-aminoimidazole-4-carboxamide ribotide transformylas                                        | YMR120c | orf19.492   |
| CA1344 | IPF14623   | 1.1  | -1.6 | -1.8 | -1.6 | unknown function                                                                             | YPR009w | orf19.4342  |
| CA2244 | AAT22      | -1.1 | -1.7 | -2.1 | -1.6 | aspartate aminotransferase (by homology)                                                     |         | orf19.4669  |
| CA5346 | IPF867     | -1.0 | -1.5 | -1.9 | -1.6 | unknown function                                                                             | YKR029c | orf19.7221  |
| CA5588 | SOD22.3F   | 1.1  | -1.8 | -2.1 | -1.6 | superoxide dismutase, 3-prime end (by homology)                                              |         |             |
| CA4270 | NUP2       | -1.3 | -1.6 | -2.0 | -1.6 | Nuclear pore protein (by homology)                                                           | YLR335w | orf19.6665  |



|        |           |      |      |      |      |                                                                                               |         |             |
|--------|-----------|------|------|------|------|-----------------------------------------------------------------------------------------------|---------|-------------|
| CA6095 | SNF3      | 1.0  | -1.7 | -2.0 | -1.6 | High affinity glucose transport protein (by homology)                                         | YDL194w | orf19.5962  |
| CA1716 | IPF17237  | 1.1  | -1.4 | -1.8 | -1.6 | unknown function                                                                              |         | orf19.3335  |
| CA5725 | GLG2      | 1.1  | -1.9 | -2.2 | -1.6 | Self-glucosylating initiator of glycogen synthesis (by homology)                              |         | orf19.7434  |
| CA2522 | GCV1      | -1.1 | -2.0 | -2.0 | -1.6 | glycine cleavage T protein (by homology)                                                      | YDR019c | orf19.5519  |
| CA6072 | DBP10     | -1.3 | -1.5 | -2.1 | -1.6 | Putative ATP-dependent RNA helicase (by homology)                                             | YDL031w | orf19.5991  |
| CA0415 | FRP3      | 1.4  | -1.5 | -1.6 | -1.7 | member of the FRP family of proteins related to Yarrowia YCR010c                              |         | orf19.1224  |
| CA6084 | IPF29     | -1.1 | -1.7 | -2.0 | -1.7 | zinc finger protein (by homology)                                                             |         | orf19.5975  |
| CA1539 | BFR1      | -1.5 | -1.7 | -2.1 | -1.7 | Similar to <i>Saccharomyces cerevisiae</i> Bfr1p involved in t YOR198c                        |         | orf19.4560  |
| CA4203 | SWI4      | -1.3 | -1.4 | -1.9 | -1.7 | transcription factor (by homology)                                                            |         | orf19.12020 |
| CA3993 | IPF8275   | -1.3 | -1.4 | -1.8 | -1.7 | unknown function                                                                              | YGR090w | orf19.9142  |
| CA3765 | IPF18298  | -1.8 | -1.4 | -2.4 | -1.7 | unknown function                                                                              |         | orf19.2904  |
| CA0791 | LSC1      | 1.1  | -1.9 | -1.8 | -1.7 | succinate-CoA ligase / synthetase (by homology)                                               | YOR142w | orf19.3358  |
| CA0107 | POL3.5EOC | -1.2 | -1.4 | -2.7 | -1.7 | DNA Polymerase III, 5-prime end                                                               | YDL102w | orf19.5183  |
| CA5676 | FAA22     | -1.1 | -2.1 | -2.1 | -1.7 | Long-chain-fatty-acid--CoA ligase (by homology)                                               |         | orf19.7379  |
| CA2663 | NUP133    | -1.7 | -1.5 | -2.1 | -1.7 | nuclear pore protein (by homology)                                                            | YKR082w | orf19.3552  |
| CA1238 | IPF15781  | -1.3 | -2.0 | -2.5 | -1.7 | unknown function                                                                              |         | orf19.8335  |
| CA1605 | SWI6      | -1.5 | -1.6 | -2.0 | -1.7 | Transcription factor (by homology)                                                            | YLR182w | orf19.4725  |
| CA5899 | IPF2382   | -1.2 | -1.8 | -2.1 | -1.7 | unknown function                                                                              |         | orf19.6807  |
| CA2947 | IPF6298   | 1.1  | -1.9 | -1.8 | -1.7 | unknown function                                                                              |         | orf19.1964  |
| CA4638 | UGA2      | -1.1 | -1.6 | -2.7 | -1.8 | succinate-semialdehyde dehydrogenase (NAD(P)+) (by YBR006w)                                   |         | orf19.345   |
| CA1051 | CHT2      | 1.2  | -1.8 | -1.7 | -1.8 | chitinase 2 precursor                                                                         |         | orf19.3895  |
| 2262.1 |           | -1.1 | -1.3 | -1.7 | -1.8 |                                                                                               |         |             |
| CA2858 | ACS2      | -1.2 | -1.8 | -1.7 | -1.8 | acetyl-coenzyme-A synthetase (by homology)                                                    | YLR153c | orf19.1064  |
| CA1367 | IPF16755  | -1.2 | -2.1 | -2.4 | -1.8 | unknown function                                                                              | YPR021c | orf19.4966  |
| CA5971 | GNP2      | 1.1  | -1.7 | -1.8 | -1.8 | high affinity glutamine permease (by homology)                                                |         | orf19.7565  |
| CA4441 | IPF2268.3 | -1.1 | -1.4 | -1.7 | -1.8 | unknown function, 3-prime end                                                                 |         |             |
| CA4442 | IPF3537   | 1.1  | -2.1 | -2.1 | -1.8 | unknown function                                                                              |         | orf19.6838  |
| CA3915 | IPF3277   | 1.2  | -2.0 | -2.1 | -1.8 | unknown function                                                                              |         | orf19.4384  |
| CA2582 | TAL1      | -1.2 | -1.8 | -2.0 | -1.8 | transaldolase (by homology)                                                                   | YLR354c | orf19.4371  |
| CA3242 | RAT1      | -1.6 | -1.7 | -2.4 | -1.8 | 5'-3' Exoribonuclease (by homology)                                                           | YOR048c | orf19.4681  |
| CA1146 | CWH8      | 1.5  | -1.9 | -1.6 | -1.8 | putative required protein for full levels of dolichol-linked                                  | YGR036c | orf19.3682  |
| CA5060 | IPF3690   | -1.2 | -1.9 | -2.1 | -1.8 | unknown function                                                                              | YDR036c | orf19.3029  |
| CA0848 | ACS1      | -1.0 | -2.1 | -2.0 | -1.8 | acetyl-coenzyme-A synthetase (by homology)                                                    | YAL054c | orf19.1743  |
| CA3566 | GUT2      | 1.1  | -1.6 | -1.6 | -1.8 | Glycerol-3-phosphate dehydrogenase, mitochondrial (b)                                         | YIL155c | orf19.3133  |
| CA3528 | GLY1      | -1.2 | -2.0 | -2.2 | -1.8 | L-threonine aldolase                                                                          |         | orf19.8601  |
| CA4183 | SNO1      | -1.0 | -2.2 | -2.1 | -1.8 | hisH-like protein (by homology)                                                               | YMR095c | orf19.10465 |
| CA3827 | IPF10662  | 1.0  | -1.6 | -1.9 | -1.9 | unknown function                                                                              |         | orf19.5760  |
| CA3713 | OPS4      | 1.2  | -2.0 | -3.3 | -1.9 | opaque - phase specific protein OP4, precursor (by homology)                                  |         | orf19.4934  |
| CA5426 | FAS1      | -1.2 | -1.7 | -2.0 | -1.9 | Fatty-acyl-CoA synthase, beta chain.                                                          | YKL182w | orf19.979   |
| CA2061 | CDC61.5F  | -1.3 | -1.3 | -2.1 | -1.9 | Cytosolic leucyl-tRNA synthetase, 5-prime end                                                 | YPL160w | orf19.2562  |
| CA3818 | IPF6695   | -1.5 | -2.2 | -2.5 | -1.9 | unknown function                                                                              | YOL057w | orf19.5773  |
| CA3017 | IPF10021  | -1.3 | -2.0 | -2.3 | -1.9 | unknown function                                                                              | YER040w | orf19.11393 |
| CA0929 | GUT1      | -1.0 | -1.7 | -1.9 | -1.9 | Glycerol kinase (by homology)                                                                 | YHL032c | orf19.558   |
| CA5259 | OSM2      | -1.2 | -2.0 | -1.7 | -1.9 | Osmotic growth protein (by homology)                                                          |         | orf19.5005  |
| CA3813 | FRP1      | 1.1  | -1.8 | -1.9 | -1.9 | member of the FRP family of proteins related to <i>Yarrowia lipolytica</i> glyoxylate pathway |         | orf19.2496  |
| CA5797 | IPF4182   | 1.0  | -1.9 | -2.6 | -1.9 | unknown function                                                                              |         | orf19.5446  |
| CA4663 | IPF6554   | -1.2 | -1.9 | -2.1 | -1.9 | unknown function                                                                              | YJL103c | orf19.4450  |
| CA1765 | APE2      | -1.3 | -1.4 | -2.0 | -2.0 | aminopeptidase yscII                                                                          | YKL157w | orf19.5197  |
| CA0428 | ILV2      | -1.5 | -2.0 | -2.5 | -2.0 | acetolactate synthase (by homology)                                                           | YMR108w | orf19.1613  |



|        |              |      |      |      |      |                                                                                |                            |             |
|--------|--------------|------|------|------|------|--------------------------------------------------------------------------------|----------------------------|-------------|
| CA3603 | MEF1         | -1.3 | -1.8 | -2.0 | -2.0 | mitochondrial translation elongation factor G (by homolc                       | YLR069c                    | orf19.4932  |
| CA4672 | IPF3659      | -1.6 | -1.5 | -2.1 | -2.0 | similar to <i>Saccharomyces cerevisiae</i> Nsp1p nuclear po                    | YJL041w                    | orf19.900   |
| CA1397 | TOM72        | -1.9 | -1.9 | -2.4 | -2.0 | mitochondrial import receptor (by homology)                                    | YNL121c                    | orf19.3700  |
| CA5629 | CTR9         | -1.5 | -1.5 | -2.9 | -2.0 | required for G1 cyclin expression (by homology)                                | YOL145c                    | orf19.7067  |
| CA2470 | SDH12        | -1.2 | -1.9 | -1.8 | -2.0 | Succinate dehydrogenase (by homology)                                          |                            | orf19.10389 |
| CA1075 | IPF4991      | -1.5 | -2.7 | -2.6 | -2.0 | putative membrane protein                                                      | Missing in array           | orf19.2531  |
| CA3149 | KGD1         | 1.1  | -2.0 | -2.1 | -2.0 | 2-oxoglutarate dehydrogenase                                                   | YIL125w                    | orf19.6165  |
| CA4255 | FUM11        | -1.2 | -2.0 | -2.1 | -2.0 | fumarate hydratase                                                             | YPL262w                    | orf19.543   |
| CA1000 | IPF6011      | 1.1  | -1.8 | -2.1 | -2.0 | unknown function                                                               |                            | orf19.9061  |
| CA2998 | LPD1         | -1.3 | -1.9 | -2.6 | -2.0 | dihydrolipoamide dehydrogenase (by homology)                                   | YFL018c                    | orf19.6127  |
| CA6107 | FAS2.3F      | 1.6  | -1.2 | -1.2 | -2.1 | fatty-acyl-CoA synthase, alpha chain, 3-prime end                              | YPL231w                    | orf19.5949  |
| CA0098 | IPF16479     | -1.2 | -2.1 | -2.3 | -2.1 | unknown function                                                               | YDR365c                    | orf19.2319  |
| CA3227 | AAT21        | -1.4 | -2.1 | -2.1 | -2.1 | aspartate aminotransferase (by homology)                                       | YLR027c                    | orf19.6287  |
| CA6106 | FAS2.53F     | -1.0 | -1.3 | -3.1 | -2.1 | fatty-acyl-CoA synthase, alpha chain, internal fragment                        |                            |             |
| CA1639 | ²F18641.EXON | -1.8 | -1.8 | -2.8 | -2.1 | unknown function, exon 1                                                       |                            | orf19.1733  |
| CA1891 | IPF10196     | -1.3 | -2.4 | -2.7 | -2.2 | unknown function                                                               | YDR216w                    | orf19.2752  |
| CA0186 | PLB4.3F      | 1.0  | -2.5 | -3.2 | -2.2 | phospholipase, 3-prime end (by homology)                                       |                            | orf19.9018  |
| CA1640 | ²F18641.EXON | -2.3 | -1.9 | -2.9 | -2.2 | unknown function, exon 2                                                       |                            | orf19.1732  |
| CA5655 | IPF18080     | -1.5 | -2.3 | -2.5 | -2.2 | unknown function                                                               | YIL083c                    | orf19.7357  |
| CA5992 | FAA4         | -1.1 | -2.2 | -2.5 | -2.3 | long-chain fatty acid--CoA ligase and synthetase 4 (by f                       | YMR246w                    | orf19.7592  |
| CA1650 | IPF5389      | 1.2  | -2.5 | -3.4 | -2.3 | 3-hydroxyisobutyrate dehydrogenase by homology                                 |                            | orf19.5565  |
| CA0783 | ACR1         | 1.1  | -3.3 | -3.5 | -2.3 | Succinate-fumarate transporter (by homology)                                   | YJR095w                    | orf19.3931  |
| CA5990 | IPF690.5F    | -2.0 | -1.7 | -3.0 | -2.3 | NADH dehydrogenase (ubiquinone) 78K chain precursor, 5-prime end (by homology) |                            | orf19.7590  |
| CA4158 | DLD3         | -1.1 | -2.7 | -2.5 | -2.3 | D-lactate ferricytochrome C oxidoreductase (by homology)                       |                            | orf19.5805  |
| CA3455 | ²F10533.EXON | -1.2 | -2.2 | -2.5 | -2.3 | unknown function, exon 2                                                       |                            | orf19.1256  |
| CA4803 | PEX4         | 1.3  | -2.5 | -3.0 | -2.4 | E2 ubiquitin-conjugating enzyme -peroxin (by homology                          | YGR133w                    | orf19.4041  |
| CA5263 | CYB3         | -1.2 | -3.2 | -2.7 | -2.5 | Lactate dehydrogenase cytochrome b2 (by homology)                              | YML054c                    | orf19.5000  |
| CA5993 | ASP1         | -1.3 | -2.5 | -2.7 | -2.5 | L-asparaginase (by homology)                                                   | YDR321w                    | orf19.7593  |
| CA0310 | PEX11        | 1.6  | -2.2 | -2.0 | -2.5 | peroxisomal membrane protein - peroxin by homology                             | YOL147c                    | orf19.8690  |
| CA1225 | SPS20        | 1.0  | -2.1 | -2.2 | -2.5 | peroxisomal 2,4-dienoyl-CoA reductase (by homology)                            |                            | orf19.4157  |
| CA2204 | DIP51.5F     | 1.7  | -2.1 | -1.8 | -2.5 | dicarboxylic amino acid permease, 5-prime end (by homology)                    |                            | orf19.2943  |
| CA2203 | DIP51.3F     | 1.0  | -2.4 | -2.7 | -2.6 | dicarboxylic amino acid permease, 3-prime end (by hon                          | YPL265w                    | orf19.2942  |
| CA1144 | SPS19        | 1.1  | -2.6 | -3.6 | -2.6 | peroxisomal 2,4-dienoyl-CoA reductase (by homology)                            | YNL202w                    | orf19.11168 |
| CA4351 | FUM12.3F     | -1.1 | -2.8 | -2.9 | -2.6 | Fumarate hydratase, 3-prime end (by homology)                                  |                            | orf19.6725  |
| CA4311 | FAA23        | -1.2 | -2.8 | -3.0 | -2.6 | Long-chain-fatty-acid--CoA ligase (by homology)                                |                            | orf19.4114  |
| CA2997 | KGD2         | -1.4 | -2.7 | -3.2 | -2.6 | 2-oxoglutarate dehydrogenase complex E2 component                              | YDR148c                    | orf19.6126  |
| CA1301 | YHM2         | -1.4 | -3.6 | -4.4 | -2.7 | mtDNA stabilizing protein (by homology)                                        | YMR241w                    | orf19.4197  |
| CA4349 | FUM12.5F     | -1.2 | -2.5 | -3.0 | -2.7 | Fumarate hydratase, 5-prime end (by homology)                                  |                            | orf19.6724  |
| CA1596 | FAA21        | -1.2 | -3.0 | -3.8 | -2.7 | long-chain-fatty-acid-CoA ligase (by homology)                                 | YER015w                    | orf19.272   |
| CA3945 | CHA12        | 1.0  | -3.2 | -3.6 | -2.7 | L-serine/L-threonine deaminase (by homology)                                   |                            | orf19.9548  |
| CA0664 | LSC2.3EOC1   | 1.0  | -2.7 | -2.9 | -2.7 | succinate-CoA ligase beta subunit, 3-prime end (by hon                         | YGR244c                    | orf19.710   |
| CA1414 | CHO2         | -1.7 | -2.4 | -2.8 | -2.8 | phosphatidylethanolamine N-methyltransferase (by hon                           | YGR157w                    | orf19.169   |
| CA4184 | SNZ1         | -1.2 | -3.6 | -4.6 | -2.8 | stationary phase protein by homology                                           | YMR096w                    | orf19.2947  |
| CA1561 | POT12        | 1.0  | -2.8 | -3.7 | -2.8 | peroxysomal 3-ketoacyl-CoA thiolase B (by homology)                            |                            | orf19.1704  |
| CA1775 | GDH2         | 1.1  | -2.9 | -3.1 | -2.8 | NAD-specific glutamate dehydrogenase (NAD) (by hom                             | YDL215c                    | orf19.9738  |
| CA6105 | FAS2.5F      | -1.1 | -1.6 | -4.0 | -2.9 | fatty-acyl-CoA synthase, alpha chain, 5-prime end                              |                            | orf19.5951  |
| CA3376 | LSC2.3EOC2   | -1.4 | -2.4 | -3.8 | -2.9 | succinate-CoA ligase beta subunit, 3-prime end (by homology)                   |                            |             |
| CA5848 | IPF407       | -1.1 | -3.2 | -4.3 | -3.0 | unknown function                                                               | YGR161c                    | orf19.7504  |
| CA3485 | IPF3213      | -1.7 | -3.2 | -4.4 | -3.0 | similar to <i>Saccharomyces cerevisiae</i> Pex6p peroxisoma                    | YNL329c ; Missing in array | orf19.3573  |

|        |             |      |       |       |       |                                                                                 |         |             |
|--------|-------------|------|-------|-------|-------|---------------------------------------------------------------------------------|---------|-------------|
| CA1574 | PXP2        | -1.1 | -3.1  | -3.7  | -3.0  | acyl-CoA oxidase peroxisomal (by homology)                                      |         | orf19.1655  |
| CA3914 | IPF3282     | 1.3  | -3.1  | -2.9  | -3.0  | hexose transporter (by homology)                                                |         | orf19.4386  |
| CA0807 | IPF12564    | -1.3 | -3.5  | -3.4  | -3.0  | ADP/ATP carrier proteins (by homology)                                          | YPL134c | orf19.3518  |
| CA0185 | PLB4.5F     | -1.1 | -3.6  | -4.3  | -3.1  | Phospholipase, 5-prime end (by homology)                                        |         | orf19.9017  |
| CA0643 | IDP2        | -1.1 | -3.6  | -4.8  | -3.1  | isocitrate dehydrogenase, cytosolic (by homology)                               | YLR174w | orf19.3733  |
| CA5972 | GNP1        | 1.3  | -3.9  | -5.5  | -3.1  | high affinity glutamine permease (by homology)                                  |         | orf19.7566  |
| CA0290 | POT14       | -1.2 | -3.4  | -2.9  | -3.2  | acetyl-CoA acetyltransferase (by homology)                                      | YPL028w | orf19.1591  |
| CA1496 | CTR1        | -1.1 | -2.1  | -2.2  | -3.4  | copper transport protein                                                        | YPR124w | orf19.3646  |
| CA5293 | FAA24       | -1.3 | -3.1  | -5.0  | -3.5  | Long-chain-fatty-acid--CoA ligase (by homology)                                 |         | orf19.7156  |
| CA1506 | HGT11       | 1.5  | -2.3  | -4.2  | -3.6  | hexose transporter                                                              | YFL040w | orf19.4527  |
| CA5816 | ACC1        | -1.5 | -3.4  | -4.4  | -3.6  | acetyl-coenzyme-A carboxylase (by homology)                                     | YNR016c | orf19.7466  |
| CA3883 | GCV2        | -1.2 | -3.7  | -5.2  | -3.7  | Glycine decarboxylase P subunit                                                 | YMR189w | orf19.8015  |
| CA1552 | PUT1        | -1.4 | -4.0  | -5.4  | -3.7  | proline oxidase (by homology)                                                   | YLR142w | orf19.4274  |
| CA4159 | ALD5        | 1.5  | -3.3  | -2.7  | -3.7  | aldehyde dehydrogenase (NAD+) (by homology)                                     | YER073w | orf19.13228 |
| CA4038 | HGT12       | 1.4  | -3.4  | -5.4  | -3.8  | hexose transporter                                                              |         | orf19.3668  |
| CA2561 | CAR2        | -1.2 | -4.7  | -4.7  | -3.8  | ornithine aminotransferase (by homology)                                        | YLR438w | orf19.5641  |
| CA1181 | UGA12.5F    | -1.4 | -8.2  | -11.9 | -3.8  | 4-aminobutyrate aminotransferase (GABA transaminase), 5-prime end (by homology) |         | orf19.802   |
| CA3416 | FRE30.3     | 1.5  | -1.9  | -2.1  | -3.9  | Strong similarity to ferric reductase Fre2p, 3-prime end (by homology)          |         | orf19.6139  |
| CA1139 | IPF9466     | -1.7 | -5.1  | -6.8  | -4.0  | unknown function                                                                |         | orf19.4066  |
| 9601.2 |             | 1.2  | -3.9  | -4.2  | -4.1  |                                                                                 |         |             |
| CA0659 | IPF16189.3F | -1.3 | -3.9  | -4.9  | -4.2  | panthotenate kinase, 3-prime end (by homology)                                  |         | orf19.5576  |
| CA0472 | STL1        | 1.3  | -3.9  | -3.9  | -4.3  | sugar transporter (by homology)                                                 | YDR536w | orf19.13176 |
| CA2661 | AAT1        | -1.1 | -4.6  | -4.9  | -4.5  | aspartate aminotransferase (by homology)                                        |         | orf19.3554  |
| CA5826 | MDH11       | -1.0 | -5.0  | -6.1  | -4.6  | Malate dehydrogenase (by homology)                                              |         | orf19.7481  |
| CA2290 | IPF16300    | -1.2 | -5.1  | -6.1  | -4.7  | putative aldehyde dehydrogenase (by homology)                                   |         | orf19.742   |
| CA4748 | MLS1        | -1.6 | -4.2  | -7.3  | -4.8  | malate synthase                                                                 | YNL117w | orf19.4833  |
| CA0345 | ACH1        | 1.7  | -4.0  | -3.1  | -5.5  | acetyl-coenzyme-A hydrolase (by homology)                                       | YBL015w | orf19.10681 |
| CA3415 | FRE30.53    | -1.2 | -3.7  | -4.0  | -5.7  | Strong similarity to ferric reductase, internal fragment (by homology)          |         | orf19.6140  |
| CA1180 | UGA12.3F    | -1.8 | -5.8  | -9.6  | -6.4  | 4-aminobutyrate aminotransferase (GABA transaminase), 3-prime end (by homology) |         | orf19.803   |
| CA2163 | IPF11879    | -1.5 | -7.0  | -7.4  | -6.6  | unknown function                                                                |         | orf19.5293  |
| CA3241 | IPF7493     | 1.1  | -7.9  | -15.9 | -7.1  | putative permease (by homology)                                                 |         | orf19.4682  |
| CA3399 | PUT2        | -1.3 | -8.3  | -9.8  | -7.1  | 1-pyrroline-5-carboxylate dehydrogenase (by homology)                           | YHR037w | orf19.3974  |
| CA3199 | FBP1        | -1.1 | -6.2  | -7.9  | -7.2  | Fructose-1,6-bisphosphatase                                                     | YLR377c | orf19.6178  |
| CA5862 | POT11       | -1.2 | -8.2  | -10.0 | -8.1  | peroxysomal 3-ketoacyl-CoA thiolase A (by homology)                             | YIL160c | orf19.7520  |
| CA1572 | POX4        | -1.0 | -8.4  | -11.0 | -8.2  | peroxisomal fatty acyl-CoA oxidase (by homology)                                | YGL205w | orf19.9221  |
| CA3011 | CTA1        | 1.0  | -9.1  | -7.2  | -8.5  | catalase A, peroxisomal (by homology)                                           | YDR256c | orf19.6229  |
| CA5152 | CAT2        | 1.0  | -7.2  | -10.2 | -10.3 | carnitine O-acetyltransferase (by homology)                                     | YML042w | orf19.4591  |
| CA5478 | JEN2        | 1.0  | -12.4 | -18.3 | -15.8 | carboxylic acid transporter protein (by homology)                               |         | orf19.12767 |
| CA5857 | PCK1        | 1.3  | -11.5 | -12.0 | -19.3 | phosphoenolpyruvate carboxykinase                                               | YKR097w | orf19.7514  |

Venn diagrams comparing the number of genes regulated by low, medium and high glucose

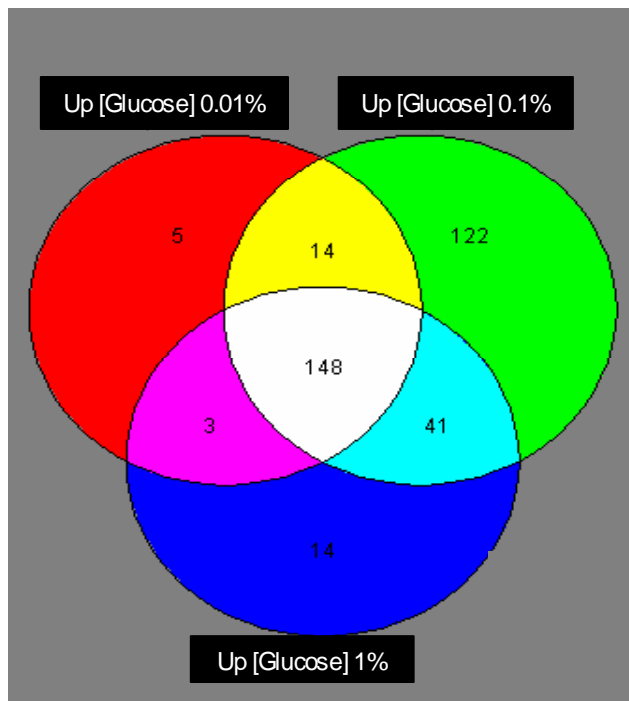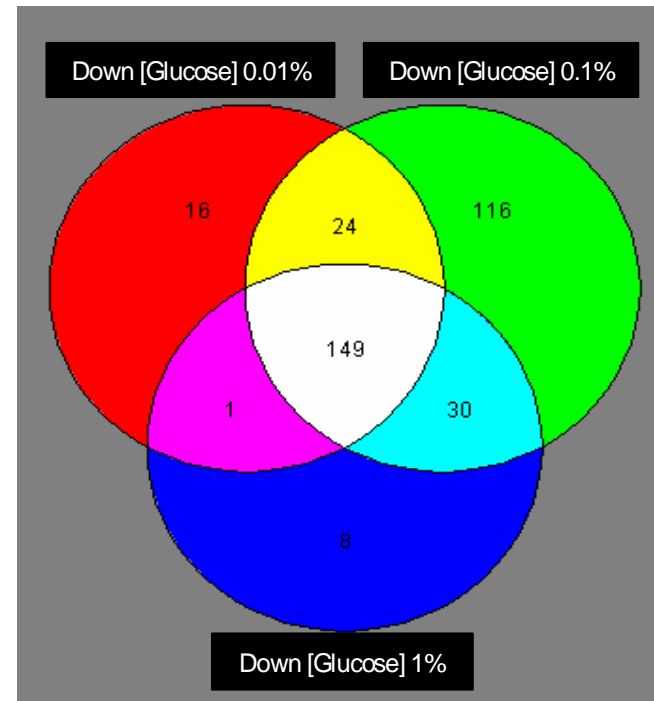

# Complete *S. cerevisiae* dataset

From Yin *et al.* (2003) *Molec. Microbiol.* 48, 713-724.

## Heatmap Scale

|      |      |       |       |
|------|------|-------|-------|
| >=10 | 5.00 | 0.00  | -5.00 |
| 9.62 | 4.62 | -0.38 | -5.38 |
| 9.23 | 4.23 | -0.77 | -5.77 |
| 8.85 | 3.85 | -1.15 | -6.15 |
| 8.46 | 3.46 | -1.54 | -6.54 |
| 8.08 | 3.08 | -1.92 | -6.92 |
| 7.69 | 2.69 | -2.31 | -7.31 |
| 7.31 | 2.31 | -2.69 | -7.69 |
| 6.92 | 1.92 | -3.08 | -8.08 |
| 6.54 | 1.54 | -3.46 | -8.46 |
| 6.15 | 1.15 | -3.85 | -8.85 |
| 5.77 | 0.77 | -4.23 | -9.23 |
| 5.38 | 0.38 | -4.62 | <=-10 |

| Gene Name | Systematic | Common | Expression ratio          |      |       |       |
|-----------|------------|--------|---------------------------|------|-------|-------|
|           |            |        | Glucose Concentration (%) |      |       |       |
|           |            |        | 0.00                      | 0.01 | 0.10  | 1.00  |
| YIL053W   | RHR2       |        | 1.00                      | 3.60 | 3.48  | 10.60 |
| YDR345C   | HXT3       |        | 1.00                      | 8.70 | 11.38 | 9.05  |
| YHR094C   | HXT1       |        | 1.00                      | 3.52 | 5.18  | 8.97  |
| YCL030C   | HIS4       |        | 1.00                      | 1.55 | 2.87  | 6.80  |
| YOL059W   | GPD2       |        | 1.00                      | 1.66 | 2.97  | 6.49  |
| YHR174W   | ENO2       |        | 1.00                      | 2.43 | 3.88  | 6.29  |
| YAR073W   | IMD1       |        | 1.00                      | 2.57 | 5.18  | 6.17  |
| YER062C   | HOR2       |        | 1.00                      | 1.37 | 2.83  | 6.16  |
| YER165W   | PAB1       |        | 1.00                      | 1.66 | 2.94  | 6.07  |
| YMR011W   | HXT2       |        | 1.00                      | 3.03 | 14.99 | 5.47  |
| YAL038W   | CDC19      |        | 1.00                      | 2.28 | 3.64  | 5.36  |
| YPR156C   | TPO3       |        | 1.00                      | 1.07 | 1.23  | 5.27  |
| YDR417C   |            |        | 1.00                      | 2.53 | 3.30  | 5.20  |
| YER102W   | RPS8B      |        | 1.00                      | 2.35 | 3.37  | 4.97  |
| YLR044C   | PDC1       |        | 1.00                      | 1.88 | 3.71  | 4.90  |
| YDL131W   | LYS21      |        | 1.00                      | 1.24 | 2.06  | 4.79  |
| YEL026W   | SNU13      |        | 1.00                      | 1.96 | 2.05  | 4.76  |
| YGL003C   | CDH1       |        | 1.00                      | 1.99 | 3.17  | 4.62  |
| YKL060C   | FBA1       |        | 1.00                      | 2.04 | 3.72  | 4.61  |
| YER081W   | SER3       |        | 1.00                      | 1.35 | 2.33  | 4.58  |
| YMR217W   | GUA1       |        | 1.00                      | 1.87 | 3.22  | 4.57  |
| YDL014W   | NOP1       |        | 1.00                      | 1.69 | 1.84  | 4.43  |
| YKL029C   | MAE1       |        | 1.00                      | 1.22 | 1.75  | 4.38  |
| YOL058W   | ARG1       |        | 1.00                      | 1.42 | 1.65  | 4.37  |
| YCR031C   | RPS14A     |        | 1.00                      | 1.90 | 2.70  | 4.35  |
| YPL220W   | RPL1A      |        | 1.00                      | 2.81 | 4.17  | 4.29  |
| YPR035W   | GLN1       |        | 1.00                      | 1.09 | 1.57  | 4.28  |
| YPL273W   | SAM4       |        | 1.00                      | 1.90 | 3.47  | 4.25  |
| YPL131W   | RPL5       |        | 1.00                      | 1.50 | 3.22  | 4.23  |
| YFL001W   | DEG1       |        | 1.00                      | 2.17 | 2.57  | 4.15  |
| YGR254W   | ENO1       |        | 1.00                      | 1.80 | 2.73  | 4.15  |
| YHL033C   | RPL8A      |        | 1.00                      | 1.58 | 2.36  | 4.14  |
| YDR342C   | HXT7       |        | 1.00                      | 9.98 | 12.06 | 4.06  |
| YDR418W   | RPL12B     |        | 1.00                      | 2.62 | 2.70  | 4.04  |
| YLR300W   | EXG1       |        | 1.00                      | 1.41 | 1.83  | 4.04  |
| YLR339C   |            |        | 1.00                      | 1.84 | 3.82  | 3.91  |
| YJR028W   |            |        | 1.00                      | 1.72 | 3.20  | 3.88  |
| YNL069C   | RPL16B     |        | 1.00                      | 1.63 | 2.90  | 3.86  |
| YGR138C   | TPO2       |        | 1.00                      | 1.55 | 1.39  | 3.82  |

|         |        |      |       |       |      |
|---------|--------|------|-------|-------|------|
| YDR037W | KRS1   | 1.00 | 1.35  | 1.60  | 3.81 |
| YPL079W | RPL21B | 1.00 | 2.21  | 2.55  | 3.77 |
| YJR109C | CPA2   | 1.00 | 1.30  | 1.36  | 3.76 |
| YGR148C | RPL24B | 1.00 | 2.14  | 2.78  | 3.73 |
| YKL180W | RPL17A | 1.00 | 2.11  | 2.67  | 3.72 |
| YGL135W | RPL1B  | 1.00 | 1.89  | 2.39  | 3.72 |
| YHR216W | IMD2   | 1.00 | 1.74  | 2.67  | 3.71 |
| YDR050C | TPI1   | 1.00 | 1.79  | 2.27  | 3.69 |
| YPR080W | TEF1   | 1.00 | 1.74  | 2.86  | 3.65 |
| YDL048C | STP4   | 1.00 | 1.08  | 1.40  | 3.65 |
| YDR046C | BAP3   | 1.00 | 1.15  | 1.39  | 3.63 |
| YHR203C | RPS4B  | 1.00 | 1.72  | 2.25  | 3.58 |
| YER055C | HIS1   | 1.00 | 1.64  | 1.20  | 3.57 |
| YDL191W | RPL35A | 1.00 | 2.34  | 2.56  | 3.55 |
| YOR133W | EFT1   | 1.00 | 1.23  | 2.48  | 3.55 |
| YDL083C | RPS16B | 1.00 | 1.92  | 2.57  | 3.53 |
| YEL071W | DLD3   | 1.00 | 1.63  | 2.77  | 3.53 |
| YPR132W | RPS23B | 1.00 | 2.10  | 2.84  | 3.52 |
| YHR082C | KSP1   | 1.00 | 1.73  | 2.16  | 3.51 |
| YPR145W | ASN1   | 1.00 | 1.00  | 2.28  | 3.50 |
| YPR163C | TIF3   | 1.00 | 1.60  | 2.89  | 3.49 |
| YHR208W | BAT1   | 1.00 | 1.47  | 2.29  | 3.49 |
| YGR175C | ERG1   | 1.00 | 1.01  | 1.51  | 3.47 |
| YCR012W | PGK1   | 1.00 | 1.98  | 2.87  | 3.46 |
| YNL190W |        | 1.00 | 1.12  | 1.60  | 3.44 |
| YOR369C | RPS12  | 1.00 | 2.50  | 3.59  | 3.36 |
| YER006W |        | 1.00 | 1.63  | 2.47  | 3.36 |
| YPL090C | RPS6A  | 1.00 | 1.86  | 2.32  | 3.35 |
| YGL117W |        | 1.00 | 1.42  | 2.03  | 3.35 |
| YKR042W | UTH1   | 1.00 | 1.04  | 1.96  | 3.34 |
| YOR204W | DED1   | 1.00 | 1.11  | 2.42  | 3.33 |
| YOL039W | RPP2A  | 1.00 | 2.26  | 2.84  | 3.31 |
| YMR305C | SCW10  | 1.00 | 1.49  | 2.23  | 3.30 |
| YDR447C | RPS17B | 1.00 | -1.31 | 3.07  | 3.29 |
| YDR343C | HXT6   | 1.00 | 7.07  | 10.25 | 3.28 |
| YDR406W | PDR15  | 1.00 | 2.17  | 2.26  | 3.28 |
| YBR054W | YRO2   | 1.00 | 1.52  | 1.37  | 3.27 |
| YLR150W | STM1   | 1.00 | 1.87  | 2.76  | 3.24 |
| YLR340W | RPP0   | 1.00 | 1.66  | 2.61  | 3.24 |
| YOR344C | TYE7   | 1.00 | 1.37  | 2.21  | 3.24 |
| YNL162W | RPL42A | 1.00 | 2.45  | 2.57  | 3.23 |
| YOR096W | RPS7A  | 1.00 | 1.75  | 2.48  | 3.22 |
| YMR121C | RPL15B | 1.00 | 2.01  | 2.48  | 3.21 |
| YMR242C | RPL20A | 1.00 | 2.03  | 2.75  | 3.20 |
| YLR075W | RPL10  | 1.00 | 1.97  | 2.55  | 3.20 |
| YDR233C |        | 1.00 | 1.68  | 2.55  | 3.17 |
| YDR450W | RPS18A | 1.00 | 2.09  | 2.36  | 3.16 |
| YOR167C | RPS28A | 1.00 | 2.59  | 3.26  | 3.13 |
| YIL133C | RPL16A | 1.00 | 2.55  | 3.23  | 3.13 |
| YLL044W |        | 1.00 | 1.62  | 2.31  | 3.11 |
| YJR125C | ENT3   | 1.00 | 1.54  | 2.45  | 3.10 |
| YHR093W | AHT1   | 1.00 | 1.16  | 1.66  | 3.10 |
| YKL181W | PRS1   | 1.00 | 1.82  | 2.31  | 3.09 |
| YBR249C | ARO4   | 1.00 | 1.67  | 2.39  | 3.09 |
| YDR382W | RPP2B  | 1.00 | 2.48  | 3.21  | 3.08 |
| YLL045C | RPL8B  | 1.00 | 1.74  | 2.35  | 3.08 |
| YMR108W | ILV2   | 1.00 | 1.35  | 2.45  | 3.08 |
| YHR046C |        | 1.00 | -1.06 | 1.26  | 3.08 |
| YOR310C | NOP58  | 1.00 | 1.68  | 2.28  | 3.07 |
| YPL226W | NEW1   | 1.00 | 1.04  | 1.71  | 3.06 |
| YNL178W | RPS3   | 1.00 | 1.83  | 2.66  | 3.05 |



|         |        |      |       |      |      |
|---------|--------|------|-------|------|------|
| YHR179W | OYE2   | 1.00 | 1.02  | 1.63 | 3.05 |
| YLR432W | IMD3   | 1.00 | 1.48  | 2.07 | 3.04 |
| YDR025W | RPS11A | 1.00 | 1.46  | 2.03 | 3.04 |
| YFR031C | SMC2   | 1.00 | 1.52  | 2.11 | 3.02 |
| YOR063W | RPL3   | 1.00 | 1.82  | 2.94 | 3.01 |
| YDR012W | RPL4B  | 1.00 | 1.78  | 2.70 | 3.01 |
| YML063W | RPS1B  | 1.00 | 1.65  | 1.80 | 3.00 |
| YGR204W | ADE3   | 1.00 | -1.05 | 1.93 | 2.97 |
| YML123C | PHO84  | 1.00 | -1.05 | 1.67 | 2.97 |
| YLR441C | RPS1A  | 1.00 | 1.84  | 2.46 | 2.96 |
| YPR073C | LTP1   | 1.00 | 1.58  | 2.35 | 2.96 |
| YBR189W | RPS9B  | 1.00 | 1.17  | 1.58 | 2.93 |
| YGR159C | NSR1   | 1.00 | 1.20  | 1.46 | 2.92 |
| YGL147C | RPL9A  | 1.00 | 1.70  | 2.33 | 2.90 |
| YBR118W | TEF2   | 1.00 | 1.45  | 2.09 | 2.90 |
| YDR502C | SAM2   | 1.00 | 1.79  | 2.34 | 2.89 |
| YPL198W | RPL7B  | 1.00 | 1.39  | 2.47 | 2.89 |
| YFL026W | STE2   | 1.00 | 1.07  | 1.48 | 2.89 |
| YDR035W | ARO3   | 1.00 | 1.41  | 1.90 | 2.87 |
| YGR260W | TNA1   | 1.00 | 1.07  | 1.19 | 2.86 |
| YNL301C | RPL18B | 1.00 | 1.78  | 2.41 | 2.84 |
| YGL148W | ARO2   | 1.00 | 1.63  | 1.84 | 2.84 |
| YHR018C | ARG4   | 1.00 | 1.13  | 1.59 | 2.84 |
| YOL040C | RPS15  | 1.00 | 1.92  | 2.13 | 2.82 |
| YER156C |        | 1.00 | 1.48  | 2.13 | 2.80 |
| YER110C | KAP123 | 1.00 | -1.03 | 1.57 | 2.80 |
| YPL106C | SSE1   | 1.00 | 1.15  | 2.01 | 2.79 |
| YCL023C |        | 1.00 | -1.01 | 1.74 | 2.79 |
| YGR034W | RPL26B | 1.00 | 1.82  | 2.18 | 2.78 |
| YER036C | KRE30  | 1.00 | 1.07  | 1.42 | 2.78 |
| YGL102C |        | 1.00 | 2.04  | 1.98 | 2.77 |
| YDR158W | HOM2   | 1.00 | 1.77  | 2.29 | 2.77 |
| YFR023W | PES4   | 1.00 | 1.54  | 2.04 | 2.77 |
| YBL039C | URA7   | 1.00 | 1.37  | 2.16 | 2.74 |
| YNL165W |        | 1.00 | 1.17  | 2.03 | 2.73 |
| YLR076C |        | 1.00 | 1.46  | 2.15 | 2.72 |
| YPL250C | ICY2   | 1.00 | -1.10 | 2.03 | 2.72 |
| YDR489W |        | 1.00 | 1.64  | 2.12 | 2.71 |
| YKL030W |        | 1.00 | 1.04  | 1.60 | 2.71 |
| YDL081C | RPP1A  | 1.00 | 2.39  | 2.70 | 2.70 |
| YER016W | BIM1   | 1.00 | 1.50  | 1.73 | 2.70 |
| YLR367W | RPS22B | 1.00 | 1.64  | 2.40 | 2.69 |
| YDR234W | LYS4   | 1.00 | 1.35  | 1.86 | 2.69 |
| YPL093W | NOG1   | 1.00 | 1.32  | 1.70 | 2.69 |
| YLR134W | PDC5   | 1.00 | -1.16 | 2.39 | 2.68 |
| YOL121C | RPS19A | 1.00 | 1.85  | 1.93 | 2.66 |
| YGL234W | ADE5,7 | 1.00 | 1.22  | 1.48 | 2.66 |
| YIL069C | RPS24B | 1.00 | 1.90  | 1.86 | 2.65 |
| YML045W |        | 1.00 | 1.57  | 3.42 | 2.65 |
| YDR341C |        | 1.00 | 1.30  | 1.75 | 2.65 |
| YMR205C | PFK2   | 1.00 | 1.21  | 2.10 | 2.65 |
| YPR110C | RPC40  | 1.00 | 1.51  | 1.96 | 2.61 |
| YCL018W | LEU2   | 1.00 | 1.35  | 2.46 | 2.61 |
| YDR432W | NPL3   | 1.00 | 1.27  | 1.95 | 2.61 |
| YIL052C | RPL34B | 1.00 | 1.98  | 2.19 | 2.60 |
| YLR197W | SIK1   | 1.00 | 1.68  | 2.30 | 2.60 |
| YGR027C | RPS25A | 1.00 | 1.61  | 1.80 | 2.60 |
| YOR293W | RPS10A | 1.00 | 1.60  | 2.18 | 2.60 |
| YEL054C | RPL12A | 1.00 | -2.26 | 1.77 | 2.60 |
| YDR163W |        | 1.00 | 6.63  | 7.50 | 2.59 |
| YMR321C |        | 1.00 | 1.69  | 2.63 | 2.59 |

|         |        |      |       |      |      |
|---------|--------|------|-------|------|------|
| YHL001W | RPL14B | 1.00 | -1.08 | 1.72 | 2.59 |
| YGR191W | HIP1   | 1.00 | 1.27  | 1.58 | 2.58 |
| YGL026C | TRP5   | 1.00 | 1.05  | 1.92 | 2.58 |
| YDR454C | GUK1   | 1.00 | 1.74  | 2.01 | 2.57 |
| YDL051W | LHP1   | 1.00 | 1.64  | 2.10 | 2.57 |
| YDR442W |        | 1.00 | 1.19  | 1.49 | 2.57 |
| YDL061C | RPS29B | 1.00 | 1.73  | 1.89 | 2.56 |
| YDL208W | NHP2   | 1.00 | 1.66  | 1.94 | 2.56 |
| YOL109W | ZEO1   | 1.00 | 1.24  | 3.07 | 2.56 |
| YHR186C |        | 1.00 | 1.15  | 1.85 | 2.56 |
| YGR124W | ASN2   | 1.00 | -1.26 | 1.87 | 2.56 |
| YER074W | RPS24A | 1.00 | 2.21  | 2.21 | 2.54 |
| YGL030W | RPL30  | 1.00 | 1.37  | 2.42 | 2.54 |
| YNL066W | SUN4   | 1.00 | 1.23  | 1.82 | 2.54 |
| YJL223C | PAU1   | 1.00 | 1.07  | 1.34 | 2.54 |
| YER025W | GCD11  | 1.00 | 1.24  | 1.77 | 2.53 |
| YCR013C |        | 1.00 | 1.88  | 2.43 | 2.52 |
| YIL041W |        | 1.00 | 1.60  | 1.59 | 2.52 |
| YPR010C | RPA135 | 1.00 | 1.01  | 1.69 | 2.52 |
| YJL136C | RPS21B | 1.00 | 2.44  | 2.39 | 2.51 |
| YER117W | RPL23B | 1.00 | 1.85  | 1.97 | 2.51 |
| YDL097C | RPN6   | 1.00 | 1.28  | 1.70 | 2.49 |
| YOL130W | ALR1   | 1.00 | 1.05  | 1.49 | 2.49 |
| YDR385W | EFT2   | 1.00 | -1.06 | 1.77 | 2.49 |
| YNR053C |        | 1.00 | 1.25  | 1.56 | 2.48 |
| YLR264W | RPS28B | 1.00 | 1.99  | 1.65 | 2.47 |
| YGR214W | RPS0A  | 1.00 | 1.48  | 1.62 | 2.46 |
| YKL006W | RPL14A | 1.00 | 1.81  | 1.72 | 2.45 |
| YGL255W | ZRT1   | 1.00 | 1.16  | 1.27 | 2.45 |
| YPL075W | GCR1   | 1.00 | 1.31  | 1.81 | 2.44 |
| YNL061W | NOP2   | 1.00 | 1.25  | 2.02 | 2.44 |
| YGL158W | RCK1   | 1.00 | 1.42  | 2.66 | 2.43 |
| YMR300C | ADE4   | 1.00 | 1.10  | 1.14 | 2.43 |
| YMR307W | GAS1   | 1.00 | 1.09  | 2.27 | 2.43 |
| YER073W | ALD5   | 1.00 | 1.18  | 1.17 | 2.42 |
| YEL072W |        | 1.00 | 1.10  | 1.78 | 2.42 |
| YAR071W | PHO11  | 1.00 | 1.01  | 1.02 | 2.42 |
| YEL037C | RAD23  | 1.00 | 1.36  | 1.61 | 2.41 |
| YOR317W | FAA1   | 1.00 | 1.67  | 2.53 | 2.40 |
| YOL086C | ADH1   | 1.00 | 1.55  | 2.24 | 2.40 |
| YNL067W | RPL9B  | 1.00 | 1.54  | 2.37 | 2.40 |
| YGL078C | DBP3   | 1.00 | -1.01 | 1.50 | 2.40 |
| YER052C | HOM3   | 1.00 | -1.18 | 1.37 | 2.40 |
| YLR054C |        | 1.00 | 1.51  | 1.93 | 2.39 |
| YFL002C | SPB4   | 1.00 | 1.25  | 1.57 | 2.39 |
| YGL009C | LEU1   | 1.00 | 1.22  | 2.44 | 2.39 |
| YIR012W | SQT1   | 1.00 | 1.42  | 1.49 | 2.38 |
| YKR059W | TIF1   | 1.00 | 1.24  | 1.71 | 2.38 |
| YPR113W | PIS1   | 1.00 | 1.63  | 1.91 | 2.37 |
| YER056C | FCY2   | 1.00 | 1.10  | 1.51 | 2.37 |
| YJL026W | RNR2   | 1.00 | 1.26  | 1.82 | 2.36 |
| YDL130W | RPP1B  | 1.00 | 2.25  | 2.17 | 2.35 |
| YER131W | RPS26B | 1.00 | 1.71  | 2.12 | 2.35 |
| YCR034W | FEN1   | 1.00 | 1.48  | 1.89 | 2.35 |
| YLR048W | RPS0B  | 1.00 | 1.24  | 1.55 | 2.35 |
| YHR150W |        | 1.00 | 1.14  | 1.67 | 2.35 |
| YLR293C | GSP1   | 1.00 | 1.24  | 1.66 | 2.34 |
| YOL077C | BRX1   | 1.00 | 1.65  | 2.16 | 2.33 |
| YFL031W | HAC1   | 1.00 | 1.32  | 3.02 | 2.33 |
| YLR167W | RPS31  | 1.00 | 2.05  | 2.41 | 2.32 |
| YKL056C |        | 1.00 | 1.37  | 1.57 | 2.32 |

|         |        |      |       |       |      |
|---------|--------|------|-------|-------|------|
| YLR342W | FKS1   | 1.00 | -1.13 | 1.62  | 2.32 |
| YJR064W | CCT5   | 1.00 | 1.05  | 1.66  | 2.31 |
| YDL037C |        | 1.00 | -1.27 | 1.19  | 2.31 |
| YOR247W | SRL1   | 1.00 | 1.73  | 2.61  | 2.29 |
| YDR366C |        | 1.00 | 1.72  | 2.08  | 2.29 |
| YLR448W | RPL6B  | 1.00 | 1.61  | 2.42  | 2.29 |
| YBR105C | VID24  | 1.00 | 1.60  | 2.18  | 2.29 |
| YJL014W | CCT3   | 1.00 | 1.30  | 1.78  | 2.29 |
| YNL209W | SSB2   | 1.00 | 1.25  | 1.53  | 2.29 |
| YDL213C | FYV14  | 1.00 | 1.05  | 1.63  | 2.29 |
| YJL138C | TIF2   | 1.00 | 1.50  | 1.74  | 2.28 |
| YNL064C | YDJ1   | 1.00 | 1.12  | 1.62  | 2.28 |
| YHR141C | RPL42B | 1.00 | 2.01  | 2.12  | 2.27 |
| YPL238C |        | 1.00 | 1.48  | 1.70  | 2.26 |
| YLR344W | RPL26A | 1.00 | 1.79  | 2.13  | 2.25 |
| YDL143W | CCT4   | 1.00 | 1.29  | 1.59  | 2.25 |
| YBR191W | RPL21A | 1.00 | 1.13  | 1.15  | 2.25 |
| YOR312C | RPL20B | 1.00 | 1.76  | 2.09  | 2.24 |
| YLR250W | SSP120 | 1.00 | 1.37  | 2.04  | 2.24 |
| YGL103W | RPL28  | 1.00 | 1.80  | 1.79  | 2.23 |
| YNL002C | RLP7   | 1.00 | 1.08  | 1.85  | 2.23 |
| YOL107W |        | 1.00 | -1.03 | 1.73  | 2.23 |
| YJL052W | TDH1   | 1.00 | 1.62  | 2.20  | 2.22 |
| YFR055W |        | 1.00 | 1.19  | 1.31  | 2.22 |
| YGR044C | RME1   | 1.00 | 1.24  | 1.52  | 2.21 |
| YAR007C | RFA1   | 1.00 | 1.21  | 1.44  | 2.21 |
| YEL009C | GCN4   | 1.00 | 1.16  | 2.03  | 2.21 |
| YPR036W | VMA13  | 1.00 | 1.00  | 1.90  | 2.21 |
| YLR185W | RPL37A | 1.00 | 1.95  | 2.38  | 2.20 |
| YGL123W | RPS2   | 1.00 | 1.20  | 1.42  | 2.20 |
| YEL046C | GLY1   | 1.00 | -1.12 | 1.52  | 2.20 |
| YDL050C |        | 1.00 | 1.48  | 2.15  | 2.19 |
| YNL145W | MFA2   | 1.00 | 1.17  | 1.75  | 2.19 |
| YER049W |        | 1.00 | 1.04  | 1.32  | 2.19 |
| YGR264C | MES1   | 1.00 | -1.18 | 1.46  | 2.19 |
| YGR149W |        | 1.00 | 1.59  | 2.02  | 2.18 |
| YMR046C |        | 1.00 | 1.56  | 2.52  | 2.18 |
| YPR198W | SGE1   | 1.00 | -1.14 | 1.92  | 2.17 |
| YKL048C | ELM1   | 1.00 | 1.70  | 1.66  | 2.16 |
| YLR273C | PIG1   | 1.00 | 1.34  | 1.72  | 2.16 |
| YJR145C | RPS4A  | 1.00 | 1.32  | 1.25  | 2.16 |
| YBL072C | RPS8A  | 1.00 | 1.15  | 1.35  | 2.15 |
| YLR067C | PET309 | 1.00 | 1.13  | 1.69  | 2.15 |
| YDL153C | SAS10  | 1.00 | 1.66  | 2.03  | 2.14 |
| YLR062C | BUD28  | 1.00 | 1.39  | 1.48  | 2.14 |
| YHR053C | CUP1-1 | 1.00 | 1.49  | 3.59  | 2.13 |
| YML126C | ERG13  | 1.00 | 1.27  | 1.79  | 2.13 |
| YOR001W | RRP6   | 1.00 | 1.21  | 1.79  | 2.13 |
| YKL081W | TEF4   | 1.00 | 1.17  | 1.70  | 2.13 |
| YCL009C | ILV6   | 1.00 | 1.09  | 1.38  | 2.13 |
| YPL143W | RPL33A | 1.00 | 1.03  | 1.67  | 2.13 |
| YCL059C | KRR1   | 1.00 | 1.42  | 1.90  | 2.12 |
| YJL148W | RPA34  | 1.00 | 1.37  | 1.47  | 2.12 |
| YEL040W | UTR2   | 1.00 | -1.24 | -1.05 | 2.12 |
| YGR118W | RPS23A | 1.00 | 1.79  | 1.99  | 2.11 |
| YHR215W | PHO12  | 1.00 | 1.20  | 1.12  | 2.11 |
| YJR105W | ADO1   | 1.00 | 1.19  | 1.76  | 2.11 |
| YER150W | SPI1   | 1.00 | 2.15  | 2.92  | 2.10 |
| YHR010W | RPL27A | 1.00 | 1.60  | 1.93  | 2.10 |
| YKR081C |        | 1.00 | 1.31  | 1.42  | 2.10 |
| YOL092W |        | 1.00 | 1.33  | 1.61  | 2.09 |

|         |        |      |       |       |      |
|---------|--------|------|-------|-------|------|
| YDL167C | NRP1   | 1.00 | 1.20  | 1.41  | 2.09 |
| YHR219W |        | 1.00 | 1.60  | 1.92  | 2.08 |
| YMR290C | HAS1   | 1.00 | 1.26  | 1.90  | 2.08 |
| YMR309C | NIP1   | 1.00 | 1.17  | 1.65  | 2.08 |
| YPL081W | RPS9A  | 1.00 | 1.51  | 1.85  | 2.07 |
| YDR072C | IPT1   | 1.00 | 1.46  | 1.99  | 2.07 |
| YDL025C |        | 1.00 | 1.15  | 1.25  | 2.07 |
| YHR115C |        | 1.00 | 1.15  | 1.48  | 2.07 |
| YBL027W | RPL19B | 1.00 | -1.10 | 1.41  | 2.07 |
| YPL267W |        | 1.00 | 1.31  | 1.39  | 2.06 |
| YGL001C | ERG26  | 1.00 | 1.24  | 1.86  | 2.06 |
| YER120W | SCS2   | 1.00 | 1.21  | 1.76  | 2.06 |
| YHR218W |        | 1.00 | 1.10  | 2.10  | 2.06 |
| YDL060W | TSR1   | 1.00 | 1.00  | 1.40  | 2.06 |
| YDR166C | SEC5   | 1.00 | 1.86  | 1.63  | 2.05 |
| YKL152C | GPM1   | 1.00 | 1.50  | 1.80  | 2.05 |
| YJR029W |        | 1.00 | 1.39  | 2.06  | 2.05 |
| YOR335C | ALA1   | 1.00 | 1.32  | 1.87  | 2.05 |
| YLR007W |        | 1.00 | 1.27  | 1.63  | 2.05 |
| YLR355C | ILV5   | 1.00 | -1.08 | 1.09  | 2.05 |
| YDR134C |        | 1.00 | 1.54  | 2.11  | 2.04 |
| YMR038C | LYS7   | 1.00 | 1.29  | 1.70  | 2.04 |
| YNL160W | YGP1   | 1.00 | 1.25  | 1.77  | 2.04 |
| YMR246W | FAA4   | 1.00 | 1.07  | 1.37  | 2.04 |
| YMR296C | LCB1   | 1.00 | -1.05 | 1.40  | 2.04 |
| YNL110C |        | 1.00 | 1.54  | 1.65  | 2.03 |
| YNL308C | KRI1   | 1.00 | 1.35  | 1.87  | 2.03 |
| YDR232W | HEM1   | 1.00 | 1.24  | 1.33  | 2.03 |
| YIL116W | HIS5   | 1.00 | 1.08  | 1.20  | 2.03 |
| YLR056W | ERG3   | 1.00 | -1.15 | 1.77  | 2.03 |
| YOR341W | RPA190 | 1.00 | -1.46 | 1.43  | 2.03 |
| YOL105C | WSC3   | 1.00 | 1.27  | 1.57  | 2.02 |
| YNR043W | MVD1   | 1.00 | 1.22  | 1.79  | 2.02 |
| YLR175W | CBF5   | 1.00 | 1.20  | 1.39  | 2.02 |
| YNL154C | YCK2   | 1.00 | 1.16  | 1.76  | 2.02 |
| YGL055W | OLE1   | 1.00 | -2.03 | 1.92  | 2.02 |
| YLR110C | CCW12  | 1.00 | 1.68  | 2.02  | 2.01 |
| YEL003W | GIM4   | 1.00 | 1.50  | 1.36  | 2.01 |
| YER130C |        | 1.00 | 1.06  | -1.11 | 2.01 |
| YNL075W | IMP4   | 1.00 | 1.47  | 1.50  | 2.00 |
| YEL023C |        | 1.00 | -1.13 | 1.15  | 2.00 |
| YIL148W | RPL40A | 1.00 | 2.19  | 2.62  | 1.99 |
| YPL028W | ERG10  | 1.00 | 1.52  | 2.54  | 1.99 |
| YGL202W | ARO8   | 1.00 | 1.28  | 1.47  | 1.99 |
| YNL141W | AAH1   | 1.00 | -1.01 | 1.41  | 1.99 |
| YNL132W | KRE33  | 1.00 | -1.04 | 1.66  | 1.99 |
| YIL142W | CCT2   | 1.00 | 1.33  | 1.80  | 1.98 |
| YKL153W |        | 1.00 | 1.21  | 1.66  | 1.98 |
| YAL003W | EFB1   | 1.00 | 1.18  | 1.09  | 1.98 |
| YMR195W | ICY1   | 1.00 | 1.18  | 2.49  | 1.98 |
| YDR002W | YRB1   | 1.00 | 1.33  | 1.64  | 1.97 |
| YHR007C | ERG11  | 1.00 | 1.29  | 1.48  | 1.97 |
| YKL143W | LTV1   | 1.00 | 1.27  | 1.66  | 1.97 |
| YKL051W |        | 1.00 | 1.26  | 1.21  | 1.97 |
| YLR019W | PSR2   | 1.00 | 1.17  | 1.38  | 1.97 |
| YDL226C | GCS1   | 1.00 | 1.10  | 1.26  | 1.97 |
| YGR137W |        | 1.00 | 1.06  | 1.38  | 1.97 |
| YGL008C | PMA1   | 1.00 | -2.31 | -1.47 | 1.97 |
| YNL031C | HHT2   | 1.00 | 2.32  | 2.27  | 1.96 |
| YKR094C | RPL40B | 1.00 | 2.03  | 2.59  | 1.96 |
| YDR176W | NGG1   | 1.00 | 1.72  | 1.69  | 1.96 |

|         |        |      |       |       |      |
|---------|--------|------|-------|-------|------|
| YOR224C | RPB8   | 1.00 | 1.57  | 1.52  | 1.96 |
| YPL043W | NOP4   | 1.00 | 1.24  | 1.70  | 1.96 |
| YLR372W | SUR4   | 1.00 | 1.23  | 1.53  | 1.96 |
| YNL112W | DBP2   | 1.00 | 1.17  | 1.08  | 1.96 |
| YGL108C |        | 1.00 | 1.10  | 1.42  | 1.96 |
| YOR342C |        | 1.00 | 1.08  | 1.75  | 1.96 |
| YPL026C | SKS1   | 1.00 | 1.01  | 1.29  | 1.96 |
| YLR180W | SAM1   | 1.00 | -1.11 | 1.46  | 1.96 |
| YDL038C |        | 1.00 | -1.20 | -1.05 | 1.96 |
| YMR131C | RRB1   | 1.00 | 1.05  | 1.47  | 1.95 |
| YML059C |        | 1.00 | -1.05 | 1.57  | 1.95 |
| YOL142W | RRP40  | 1.00 | 1.40  | 1.64  | 1.94 |
| YPR088C | SRP54  | 1.00 | 1.24  | 1.76  | 1.94 |
| YDR429C | TIF35  | 1.00 | 1.22  | 1.64  | 1.94 |
| YHR068W | DYS1   | 1.00 | 1.09  | 1.25  | 1.94 |
| YML040W |        | 1.00 | -1.06 | 2.20  | 1.94 |
| YNL333W | SNZ2   | 1.00 | 1.77  | 1.73  | 1.93 |
| YDL111C | RRP42  | 1.00 | 1.40  | 1.28  | 1.93 |
| YGR285C | ZUO1   | 1.00 | 1.35  | 1.50  | 1.93 |
| YDR120C | TRM1   | 1.00 | 1.24  | 1.87  | 1.93 |
| YGL120C | PRP43  | 1.00 | 1.17  | 1.32  | 1.93 |
| YGR085C | RPL11B | 1.00 | 1.59  | 2.08  | 1.92 |
| YIL094C | LYS12  | 1.00 | 1.44  | 1.88  | 1.92 |
| YKR013W | PRY2   | 1.00 | 1.36  | 1.56  | 1.92 |
| YBR167C | POP7   | 1.00 | 1.33  | 1.36  | 1.92 |
| YGL204C |        | 1.00 | 1.27  | 1.43  | 1.92 |
| YLR029C | RPL15A | 1.00 | 1.12  | 1.23  | 1.92 |
| YML022W | APT1   | 1.00 | 1.06  | 1.59  | 1.92 |
| YEL047C |        | 1.00 | -1.06 | 1.29  | 1.92 |
| YLR249W | YEF3   | 1.00 | -1.37 | -1.01 | 1.92 |
| YOR375C | GDH1   | 1.00 | 1.44  | 2.45  | 1.91 |
| YMR303C | ADH2   | 1.00 | 1.41  | 1.94  | 1.91 |
| YMR208W | ERG12  | 1.00 | 1.40  | 1.55  | 1.91 |
| YER148W | SPT15  | 1.00 | 1.34  | 1.66  | 1.91 |
| YJR007W | SUI2   | 1.00 | 1.23  | 1.55  | 1.91 |
| YOR272W | YTM1   | 1.00 | 1.21  | 1.62  | 1.91 |
| YDR036C |        | 1.00 | 1.17  | 1.52  | 1.91 |
| YGL230C |        | 1.00 | 1.17  | 1.22  | 1.91 |
| YBR181C | RPS6B  | 1.00 | 1.07  | 1.02  | 1.91 |
| YCL037C | SRO9   | 1.00 | 1.22  | 1.25  | 1.90 |
| YGR192C | TDH3   | 1.00 | -1.15 | 1.40  | 1.90 |
| YOR271C |        | 1.00 | -1.27 | 1.16  | 1.90 |
| YDR064W | RPS13  | 1.00 | 1.28  | 1.07  | 1.89 |
| YLR296W |        | 1.00 | 1.25  | 1.73  | 1.89 |
| YDR055W | PST1   | 1.00 | 1.07  | 2.07  | 1.89 |
| YPL169C | MEX67  | 1.00 | 1.06  | 1.54  | 1.89 |
| YHR025W | THR1   | 1.00 | -1.16 | 1.22  | 1.89 |
| YLR061W | RPL22A | 1.00 | 1.70  | 1.70  | 1.88 |
| YOL030W |        | 1.00 | 1.62  | 1.78  | 1.88 |
| YPR086W | SUA7   | 1.00 | 1.42  | 1.71  | 1.88 |
| YOL011W | PLB3   | 1.00 | 1.35  | 1.38  | 1.88 |
| YNL007C | SIS1   | 1.00 | 1.31  | 1.24  | 1.88 |
| YJR100C |        | 1.00 | -1.14 | 1.78  | 1.88 |
| YPL037C | EGD1   | 1.00 | 1.25  | 1.45  | 1.87 |
| YKL024C | URA6   | 1.00 | 1.21  | 1.36  | 1.87 |
| YPR033C | HTS1   | 1.00 | 1.20  | 1.65  | 1.87 |
| YLR333C | RPS25B | 1.00 | 1.19  | 1.35  | 1.87 |
| YOL127W | RPL25  | 1.00 | 1.40  | 1.48  | 1.86 |
| YML106W | URA5   | 1.00 | 1.39  | 1.72  | 1.86 |
| YLR286C | CTS1   | 1.00 | 1.27  | 2.29  | 1.86 |
| YLR194C |        | 1.00 | 1.21  | 1.48  | 1.86 |



|         |        |      |       |      |      |
|---------|--------|------|-------|------|------|
| YLR169W |        | 1.00 | 1.12  | 1.44 | 1.86 |
| YAL012W | CYS3   | 1.00 | -1.01 | 1.73 | 1.86 |
| YNL167C | SKO1   | 1.00 | -1.05 | 1.51 | 1.86 |
| YGR160W | FYV13  | 1.00 | -1.25 | 1.00 | 1.86 |
| YMR202W | ERG2   | 1.00 | -1.83 | 1.20 | 1.86 |
| YLR341W | SPO77  | 1.00 | 1.50  | 1.55 | 1.85 |
| YNL096C | RPS7B  | 1.00 | 1.43  | 1.91 | 1.85 |
| YGR234W | YHB1   | 1.00 | 1.35  | 1.93 | 1.85 |
| YNL010W |        | 1.00 | 1.28  | 1.12 | 1.85 |
| YLR229C | CDC42  | 1.00 | 1.26  | 1.49 | 1.85 |
| YJR090C | GRR1   | 1.00 | 1.19  | 1.43 | 1.85 |
| YLR196W | PWP1   | 1.00 | 1.13  | 1.42 | 1.85 |
| YDR277C | MTH1   | 1.00 | 1.59  | 2.45 | 1.84 |
| YOR182C | RPS30B | 1.00 | 1.38  | 1.75 | 1.84 |
| YGL189C | RPS26A | 1.00 | 1.31  | 1.77 | 1.84 |
| YPL239W | YAR1   | 1.00 | 1.18  | 1.73 | 1.84 |
| YHR042W | NCP1   | 1.00 | 1.16  | 1.53 | 1.84 |
| YDR420W | HKR1   | 1.00 | -1.08 | 1.22 | 1.84 |
| YER043C | SAH1   | 1.00 | -1.10 | 1.44 | 1.84 |
| YPR043W | RPL43A | 1.00 | 2.15  | 2.39 | 1.83 |
| YDR076W | RAD55  | 1.00 | 1.27  | 1.59 | 1.83 |
| YCL025C | AGP1   | 1.00 | 1.14  | 1.84 | 1.83 |
| YML074C | NPI46  | 1.00 | 1.13  | 1.84 | 1.83 |
| YOL136C | PFK27  | 1.00 | -1.03 | 1.62 | 1.83 |
| YCR021C | HSP30  | 1.00 | -1.10 | 1.47 | 1.83 |
| YEL002C | WBP1   | 1.00 | 1.24  | 1.56 | 1.82 |
| YDL031W | DBP10  | 1.00 | 1.08  | 1.30 | 1.82 |
| YDR346C |        | 1.00 | -1.15 | 1.34 | 1.82 |
| YFL045C | SEC53  | 1.00 | -1.39 | 1.70 | 1.82 |
| YDL082W | RPL13A | 1.00 | 1.39  | 1.62 | 1.81 |
| YMR318C |        | 1.00 | 1.36  | 1.78 | 1.81 |
| YDR087C | RRP1   | 1.00 | 1.26  | 1.63 | 1.81 |
| YIL117C | PRM5   | 1.00 | 1.19  | 1.31 | 1.81 |
| YGL245W |        | 1.00 | 1.18  | 1.60 | 1.81 |
| YOR048C | RAT1   | 1.00 | 1.12  | 1.72 | 1.81 |
| YGR123C | PPT1   | 1.00 | 1.03  | 1.21 | 1.81 |
| YKR057W | RPS21A | 1.00 | 1.61  | 1.64 | 1.80 |
| YDR190C | RVB1   | 1.00 | 1.34  | 1.77 | 1.80 |
| YOR331C |        | 1.00 | 1.18  | 1.69 | 1.80 |
| YHR162W |        | 1.00 | 1.03  | 1.28 | 1.80 |
| YNR051C | BRE5   | 1.00 | -1.07 | 1.14 | 1.80 |
| YPR102C | RPL11A | 1.00 | 1.44  | 1.71 | 1.79 |
| YDR324C |        | 1.00 | 1.33  | 1.35 | 1.79 |
| YFL039C | ACT1   | 1.00 | 1.17  | 1.59 | 1.79 |
| YPL049C | DIG1   | 1.00 | 1.14  | 1.53 | 1.79 |
| YLL018C | DPS1   | 1.00 | 1.13  | 1.65 | 1.79 |
| YDL036C |        | 1.00 | 1.07  | 1.29 | 1.79 |
| YNL182C |        | 1.00 | 1.05  | 1.31 | 1.79 |
| YKL035W | UGP1   | 1.00 | 2.09  | 2.31 | 1.78 |
| YOR248W | TOS11  | 1.00 | 1.61  | 2.60 | 1.78 |
| YKL009W | MRT4   | 1.00 | 1.36  | 1.31 | 1.78 |
| YPR187W | RPO26  | 1.00 | 1.31  | 1.14 | 1.78 |
| YOL021C | DIS3   | 1.00 | 1.16  | 1.29 | 1.78 |
| YGR282C | BGL2   | 1.00 | 1.14  | 1.27 | 1.78 |
| YGR155W | CYS4   | 1.00 | 1.05  | 1.46 | 1.78 |
| YOR243C |        | 1.00 | -1.03 | 1.10 | 1.78 |
| YMR308C | PSE1   | 1.00 | -1.05 | 1.48 | 1.78 |
| YNL186W | UBP10  | 1.00 | -1.06 | 1.38 | 1.78 |
| YMR212C | EFR3   | 1.00 | -1.08 | 1.45 | 1.78 |
| YOR071C |        | 1.00 | -1.08 | 1.29 | 1.78 |
| YHR021C | RPS27B | 1.00 | 1.25  | 1.26 | 1.77 |

|         |        |      |       |       |      |
|---------|--------|------|-------|-------|------|
| YGR279C | SCW4   | 1.00 | 1.23  | 1.62  | 1.77 |
| YLR060W | FRS1   | 1.00 | 1.16  | 1.69  | 1.77 |
| YFL064C |        | 1.00 | 1.10  | 1.62  | 1.77 |
| YML081W |        | 1.00 | 1.04  | 1.32  | 1.77 |
| YIL074C | SER33  | 1.00 | -1.07 | 1.59  | 1.77 |
| YDR381W | YRA1   | 1.00 | 1.65  | 2.01  | 1.76 |
| YLR168C | MSF1'  | 1.00 | 1.49  | 1.67  | 1.76 |
| YNL058C |        | 1.00 | 1.34  | 1.94  | 1.76 |
| YBL036C |        | 1.00 | 1.30  | 1.41  | 1.76 |
| YHL011C | PRS3   | 1.00 | 1.28  | 1.56  | 1.76 |
| YJR009C | TDH2   | 1.00 | 1.24  | 1.61  | 1.76 |
| YOR361C | PRT1   | 1.00 | 1.20  | 1.47  | 1.76 |
| YFR001W | LOC1   | 1.00 | 1.02  | 1.47  | 1.76 |
| YLR413W |        | 1.00 | -1.08 | 1.12  | 1.76 |
| YGR054W |        | 1.00 | -1.33 | 1.54  | 1.76 |
| YHR026W | PPA1   | 1.00 | 1.25  | 1.61  | 1.75 |
| YPR183W | DPM1   | 1.00 | 1.19  | 1.75  | 1.75 |
| YOR145C |        | 1.00 | 1.09  | 1.36  | 1.75 |
| YHR071W | PCL5   | 1.00 | -1.02 | 1.30  | 1.75 |
| YMR298W |        | 1.00 | -1.06 | 1.45  | 1.75 |
| YDL227C | HO     | 1.00 | -1.57 | -1.11 | 1.75 |
| YMR243C | ZRC1   | 1.00 | 1.47  | 1.37  | 1.74 |
| YGR056W | RSC1   | 1.00 | 1.20  | 1.46  | 1.74 |
| YMR272C | SCS7   | 1.00 | 1.03  | 1.33  | 1.74 |
| YGR142W | BTN2   | 1.00 | -1.02 | 2.47  | 1.74 |
| YBR079C | RPG1   | 1.00 | -1.24 | 1.59  | 1.74 |
| YGL133W | ITC1   | 1.00 | -1.49 | 1.39  | 1.74 |
| YIL078W | THS1   | 1.00 | 1.27  | 1.56  | 1.73 |
| YPR142C |        | 1.00 | 1.14  | 1.50  | 1.73 |
| YLR100W | ERG27  | 1.00 | 1.13  | 1.68  | 1.73 |
| YNL268W | LYP1   | 1.00 | 1.12  | 1.67  | 1.73 |
| YPL279C |        | 1.00 | -1.11 | 1.13  | 1.73 |
| YOR178C | GAC1   | 1.00 | 1.50  | 2.48  | 1.72 |
| YEL034W | HYP2   | 1.00 | 1.47  | 1.81  | 1.72 |
| YBR082C | UBC4   | 1.00 | 1.07  | 1.66  | 1.72 |
| YDR049W |        | 1.00 | -1.03 | 1.21  | 1.72 |
| YLR359W | ADE13  | 1.00 | -1.11 | 1.12  | 1.72 |
| YGL037C | PNC1   | 1.00 | 1.58  | 2.34  | 1.71 |
| YOR309C |        | 1.00 | 1.47  | 1.68  | 1.71 |
| YPL145C | KES1   | 1.00 | 1.24  | 1.79  | 1.71 |
| YDR143C | SAN1   | 1.00 | 1.15  | 1.26  | 1.71 |
| YPL263C | KEL3   | 1.00 | 1.05  | 1.44  | 1.71 |
| YOR209C | NPT1   | 1.00 | 1.01  | 1.32  | 1.71 |
| YKR043C |        | 1.00 | -1.09 | 1.12  | 1.71 |
| YOR283W |        | 1.00 | -1.30 | 1.26  | 1.71 |
| YDR339C |        | 1.00 | 1.39  | 1.52  | 1.70 |
| YOR117W | RPT5   | 1.00 | 1.12  | 1.49  | 1.70 |
| YNL269W |        | 1.00 | 1.02  | 1.54  | 1.70 |
| YOR047C | STD1   | 1.00 | -1.13 | 1.11  | 1.70 |
| YHR020W |        | 1.00 | -1.16 | 1.39  | 1.70 |
| YBR104W | YMC2   | 1.00 | 1.71  | 1.94  | 1.69 |
| YKL156W | RPS27A | 1.00 | 1.44  | 1.40  | 1.69 |
| YJR122W | CAF17  | 1.00 | 1.17  | 1.29  | 1.69 |
| YMR220W | ERG8   | 1.00 | 1.12  | 1.54  | 1.69 |
| YDR501W | PLM2   | 1.00 | 1.08  | 1.21  | 1.69 |
| YMR216C | SKY1   | 1.00 | -1.04 | 1.65  | 1.69 |
| YGR208W | SER2   | 1.00 | 1.33  | 1.11  | 1.68 |
| YOL139C | CDC33  | 1.00 | 1.32  | 1.56  | 1.68 |
| YOR323C | PRO2   | 1.00 | 1.15  | 1.37  | 1.68 |
| YNL085W | MKT1   | 1.00 | 1.13  | 1.55  | 1.68 |
| YPL190C | NAB3   | 1.00 | 1.10  | 1.71  | 1.68 |

|         |        |      |       |       |      |
|---------|--------|------|-------|-------|------|
| YPR048W | TAH18  | 1.00 | -1.04 | 1.47  | 1.68 |
| YIR035C |        | 1.00 | -1.26 | 1.16  | 1.68 |
| YBR196C | PGI1   | 1.00 | -1.45 | 1.12  | 1.68 |
| YGR117C |        | 1.00 | 1.47  | 1.45  | 1.67 |
| YOR056C |        | 1.00 | 1.27  | 1.63  | 1.67 |
| YGL029W | CGR1   | 1.00 | 1.21  | 1.04  | 1.67 |
| YGL160W |        | 1.00 | 1.10  | 1.03  | 1.67 |
| YHR064C | PDR13  | 1.00 | 1.02  | 1.56  | 1.67 |
| YBR093C | PHO5   | 1.00 | -1.09 | -1.09 | 1.67 |
| YGL031C | RPL24A | 1.00 | 1.37  | 1.56  | 1.66 |
| YNL255C | GIS2   | 1.00 | 1.32  | 1.76  | 1.66 |
| YDL176W |        | 1.00 | 1.29  | 1.53  | 1.66 |
| YNL114C |        | 1.00 | 1.26  | 1.13  | 1.66 |
| YER123W | YCK3   | 1.00 | 1.17  | 1.35  | 1.66 |
| YLR147C | SMD3   | 1.00 | 1.16  | 1.32  | 1.66 |
| YER112W | LSM4   | 1.00 | 1.15  | 1.31  | 1.66 |
| YGL098W |        | 1.00 | 1.11  | 1.24  | 1.66 |
| YDR062W | LCB2   | 1.00 | 1.03  | 1.18  | 1.66 |
| YGL028C | SCW11  | 1.00 | 1.02  | 1.18  | 1.66 |
| YJL012C | VTC4   | 1.00 | -1.24 | 1.12  | 1.66 |
| YHR217C |        | 1.00 | -1.28 | 1.23  | 1.66 |
| YHR092C | HXT4   | 1.00 | -1.37 | 1.41  | 1.66 |
| YER029C | SMB1   | 1.00 | 1.60  | 2.17  | 1.65 |
| YEL015W |        | 1.00 | 1.42  | 1.30  | 1.65 |
| YJL191W | RPS14B | 1.00 | 1.24  | 1.44  | 1.65 |
| YNL109W |        | 1.00 | 1.24  | 1.35  | 1.65 |
| YER090W | TRP2   | 1.00 | 1.23  | 1.57  | 1.65 |
| YER038C | KRE29  | 1.00 | 1.20  | 1.25  | 1.65 |
| YHR170W | NMD3   | 1.00 | 1.12  | 1.32  | 1.65 |
| YBR261C |        | 1.00 | 1.11  | 1.23  | 1.65 |
| YDL203C |        | 1.00 | 1.06  | 1.17  | 1.65 |
| YKL182W | FAS1   | 1.00 | 1.05  | 1.50  | 1.65 |
| YNL119W |        | 1.00 | 1.02  | 1.41  | 1.65 |
| YOL061W | PRS5   | 1.00 | 1.00  | 1.16  | 1.65 |
| YOR184W | SER1   | 1.00 | 1.00  | 1.31  | 1.65 |
| YML058W | SML1   | 1.00 | 1.68  | 2.23  | 1.64 |
| YBR256C | RIB5   | 1.00 | 1.53  | 1.32  | 1.64 |
| YDR084C |        | 1.00 | 1.29  | 1.78  | 1.64 |
| YLR065C |        | 1.00 | 1.28  | 1.19  | 1.64 |
| YCR047C | BUD23  | 1.00 | 1.23  | 1.28  | 1.64 |
| YHR072W | ERG7   | 1.00 | 1.14  | 1.48  | 1.64 |
| YER133W | GLC7   | 1.00 | 1.04  | 1.45  | 1.64 |
| YKL212W | SAC1   | 1.00 | -1.07 | 1.26  | 1.64 |
| YOR338W |        | 1.00 | -1.10 | 1.00  | 1.64 |
| YCR059C | YIH1   | 1.00 | 1.36  | 1.20  | 1.63 |
| YLR074C | BUD20  | 1.00 | 1.35  | 1.74  | 1.63 |
| YOL064C | MET22  | 1.00 | 1.13  | 1.15  | 1.63 |
| YLR325C | RPL38  | 1.00 | 1.12  | 1.30  | 1.63 |
| YMR051C |        | 1.00 | 1.04  | 1.97  | 1.63 |
| YNL175C | NOP13  | 1.00 | 1.02  | 1.42  | 1.63 |
| YJL177W | RPL17B | 1.00 | -1.04 | 1.46  | 1.63 |
| YGL122C | NAB2   | 1.00 | -1.05 | 1.07  | 1.63 |
| YIL047C | SYG1   | 1.00 | -1.13 | -1.02 | 1.63 |
| YDL049C | KNH1   | 1.00 | -1.46 | 1.15  | 1.63 |
| YNL180C | RHO5   | 1.00 | 1.46  | 1.58  | 1.62 |
| YDR487C | RIB3   | 1.00 | 1.34  | 1.29  | 1.62 |
| YJR070C |        | 1.00 | 1.21  | 1.41  | 1.62 |
| YOR222W | ODC2   | 1.00 | 1.18  | 1.22  | 1.62 |
| YGR079W |        | 1.00 | 1.17  | 1.13  | 1.62 |
| YGR081C |        | 1.00 | 1.11  | 1.21  | 1.62 |
| YDL039C | PRM7   | 1.00 | 1.10  | -1.07 | 1.62 |

|         |        |      |       |       |      |
|---------|--------|------|-------|-------|------|
| YBR048W | RPS11B | 1.00 | 1.09  | 1.19  | 1.62 |
| YJR147W | HMS2   | 1.00 | 1.03  | 1.25  | 1.62 |
| YNL187W |        | 1.00 | -1.09 | 1.32  | 1.62 |
| YPL014W |        | 1.00 | -1.09 | 1.32  | 1.62 |
| YHL015W | RPS20  | 1.00 | 1.14  | 2.10  | 1.61 |
| YIR034C | LYS1   | 1.00 | 1.10  | 1.13  | 1.61 |
| YOL022C |        | 1.00 | 1.10  | 1.55  | 1.61 |
| YNR052C | POP2   | 1.00 | 1.09  | 1.26  | 1.61 |
| YJR027W |        | 1.00 | 1.07  | 1.41  | 1.61 |
| YJR111C |        | 1.00 | 1.06  | 1.03  | 1.61 |
| YDL136W | RPL35B | 1.00 | 1.00  | 1.18  | 1.61 |
| YDR013W |        | 1.00 | -1.04 | 1.16  | 1.61 |
| YDR069C | DOA4   | 1.00 | -1.07 | 1.07  | 1.61 |
| YNL047C |        | 1.00 | -1.08 | 1.46  | 1.61 |
| YOR267C |        | 1.00 | -1.41 | 1.00  | 1.61 |
| YDR369C | XRS2   | 1.00 | 1.52  | 2.40  | 1.60 |
| YLR113W | HOG1   | 1.00 | 1.32  | 1.67  | 1.60 |
| YOR332W | VMA4   | 1.00 | 1.28  | 1.64  | 1.60 |
| YPR143W |        | 1.00 | 1.21  | 1.58  | 1.60 |
| YLL051C | FRE6   | 1.00 | 1.20  | 1.48  | 1.60 |
| YML010W | SPT5   | 1.00 | 1.11  | 1.46  | 1.60 |
| YNL174W |        | 1.00 | -1.04 | 1.45  | 1.60 |
| YDL212W | SHR3   | 1.00 | 1.45  | 1.53  | 1.59 |
| YOR277C |        | 1.00 | 1.43  | 1.25  | 1.59 |
| YDR312W | SSF2   | 1.00 | 1.20  | 1.23  | 1.59 |
| YEL058W | PCM1   | 1.00 | 1.20  | 1.51  | 1.59 |
| YLR222C |        | 1.00 | 1.19  | 1.23  | 1.59 |
| YNL302C | RPS19B | 1.00 | 1.17  | 1.10  | 1.59 |
| YIL048W | NEO1   | 1.00 | 1.14  | 1.28  | 1.59 |
| YGL105W | ARC1   | 1.00 | 1.13  | 1.60  | 1.59 |
| YLR447C | VMA6   | 1.00 | 1.13  | 1.32  | 1.59 |
| YPR062W | FCY1   | 1.00 | 1.11  | 1.42  | 1.59 |
| YNL201C |        | 1.00 | 1.10  | 1.19  | 1.59 |
| YDR165W |        | 1.00 | 1.05  | 1.61  | 1.59 |
| YNL221C | POP1   | 1.00 | 1.03  | 1.04  | 1.59 |
| YPL146C |        | 1.00 | 1.03  | 1.58  | 1.59 |
| YER100W | UBC6   | 1.00 | 1.02  | 1.17  | 1.59 |
| YBR195C | MSI1   | 1.00 | -1.06 | -1.14 | 1.59 |
| YNL087W |        | 1.00 | -1.06 | 1.44  | 1.59 |
| YOR092W | ECM3   | 1.00 | -1.06 | -1.05 | 1.59 |
| YIL119C | RPI1   | 1.00 | -1.14 | -1.07 | 1.59 |
| YCR005C | CIT2   | 1.00 | -1.43 | -1.02 | 1.59 |
| YPR041W | TIF5   | 1.00 | 1.29  | 1.28  | 1.58 |
| YBL002W | HTB2   | 1.00 | 1.27  | 1.45  | 1.58 |
| YLR307W | CDA1   | 1.00 | 1.09  | 1.52  | 1.58 |
| YLR017W | MEU1   | 1.00 | 1.07  | 1.40  | 1.58 |
| YMR100W | MUB1   | 1.00 | 1.04  | 1.17  | 1.58 |
| YJL200C |        | 1.00 | -1.04 | 1.15  | 1.58 |
| YEL042W | GDA1   | 1.00 | -1.21 | 1.58  | 1.58 |
| YLL024C | SSA2   | 1.00 | -1.35 | -1.11 | 1.58 |
| YDR516C |        | 1.00 | 1.62  | 2.47  | 1.57 |
| YDR274C |        | 1.00 | 1.50  | 1.78  | 1.57 |
| YPR165W | RHO1   | 1.00 | 1.45  | 1.57  | 1.57 |
| YBR286W | APE3   | 1.00 | 1.41  | 1.78  | 1.57 |
| YNL062C | GCD10  | 1.00 | 1.21  | 1.83  | 1.57 |
| YBR238C |        | 1.00 | 1.11  | 1.36  | 1.57 |
| YDR051C |        | 1.00 | 1.10  | 1.21  | 1.57 |
| YOR130C | ORT1   | 1.00 | 1.10  | 1.15  | 1.57 |
| YHR193C | EGD2   | 1.00 | 1.09  | 1.40  | 1.57 |
| YPR084W |        | 1.00 | 1.06  | 1.30  | 1.57 |
| YHR196W |        | 1.00 | -1.06 | 1.15  | 1.57 |

|         |        |      |       |       |      |
|---------|--------|------|-------|-------|------|
| YOR206W | NOC2   | 1.00 | -1.35 | 1.22  | 1.57 |
| YDR370C |        | 1.00 | 1.50  | 1.51  | 1.56 |
| YDL224C | WHI4   | 1.00 | 1.49  | 1.39  | 1.56 |
| YMR235C | RNA1   | 1.00 | 1.23  | 1.18  | 1.56 |
| YPL117C | IDI1   | 1.00 | 1.20  | 1.75  | 1.56 |
| YMR101C | SRT1   | 1.00 | 1.19  | 3.24  | 1.56 |
| YOR311C | HSD1   | 1.00 | 1.19  | 1.23  | 1.56 |
| YLR378C | SEC61  | 1.00 | 1.02  | 1.37  | 1.56 |
| YCL020W |        | 1.00 | -1.01 | 1.60  | 1.56 |
| YKL149C | DBR1   | 1.00 | 1.50  | 1.33  | 1.55 |
| YDR430C |        | 1.00 | 1.36  | 1.21  | 1.55 |
| YGL076C | RPL7A  | 1.00 | 1.30  | 1.71  | 1.55 |
| YDR344C |        | 1.00 | 1.23  | 1.57  | 1.55 |
| YIL123W | SIM1   | 1.00 | 1.07  | 1.53  | 1.55 |
| YOR197W |        | 1.00 | 1.07  | 1.33  | 1.55 |
| YDL095W | PMT1   | 1.00 | -1.06 | 1.46  | 1.55 |
| YGL157W |        | 1.00 | -1.25 | 1.07  | 1.55 |
| YEL043W |        | 1.00 | -1.33 | 1.15  | 1.55 |
| YBR287W |        | 1.00 | 1.30  | 1.29  | 1.54 |
| YCR092C | MSH3   | 1.00 | 1.23  | 1.50  | 1.54 |
| YLR207W | HRD3   | 1.00 | 1.15  | 1.52  | 1.54 |
| YOR153W | PDR5   | 1.00 | -1.16 | 1.63  | 1.54 |
| YKL211C | TRP3   | 1.00 | -1.18 | -1.03 | 1.54 |
| YLL039C | UBI4   | 1.00 | 1.65  | 1.83  | 1.53 |
| YPR118W |        | 1.00 | 1.29  | 1.16  | 1.53 |
| YBR127C | VMA2   | 1.00 | 1.22  | 1.36  | 1.53 |
| YNL192W | CHS1   | 1.00 | 1.14  | 1.34  | 1.53 |
| YDR441C | APT2   | 1.00 | 1.12  | 1.14  | 1.53 |
| YAR015W | ADE1   | 1.00 | 1.11  | -1.13 | 1.53 |
| YLR329W | REC102 | 1.00 | 1.06  | 1.28  | 1.53 |
| YGL025C | PGD1   | 1.00 | 1.05  | 1.29  | 1.53 |
| YPL259C | APM1   | 1.00 | 1.02  | 1.42  | 1.53 |
| YOL097C | WRS1   | 1.00 | -1.14 | 1.11  | 1.53 |
| YPL019C | VTC3   | 1.00 | -1.15 | 1.06  | 1.53 |
| YCR053W | THR4   | 1.00 | -1.41 | 1.14  | 1.53 |
| YGR240C | PFK1   | 1.00 | -1.94 | -1.05 | 1.53 |
| YOR089C | VPS21  | 1.00 | 1.45  | 1.66  | 1.52 |
| YDL147W | RPN5   | 1.00 | 1.24  | 1.73  | 1.52 |
| YDR354W | TRP4   | 1.00 | 1.18  | 1.20  | 1.52 |
| YMR226C |        | 1.00 | 1.09  | 1.31  | 1.52 |
| YNR018W |        | 1.00 | 1.07  | 1.24  | 1.52 |
| YNL074C | MLF3   | 1.00 | 1.06  | 1.52  | 1.52 |
| YPR159W | KRE6   | 1.00 | -1.01 | 1.24  | 1.52 |
| YBR031W | RPL4A  | 1.00 | -1.02 | 1.05  | 1.52 |
| YBR049C | REB1   | 1.00 | -1.12 | -1.02 | 1.52 |
| YHR014W | SPO13  | 1.00 | -1.16 | 1.12  | 1.52 |
| YDR220C |        | 1.00 | -1.19 | -1.19 | 1.52 |
| YHL045W |        | 1.00 | -1.26 | 1.11  | 1.52 |
| YNL298W | CLA4   | 1.00 | 1.31  | 1.41  | 1.51 |
| YDR212W | TCP1   | 1.00 | 1.23  | 1.36  | 1.51 |
| YDL236W | PHO13  | 1.00 | 1.15  | 1.39  | 1.51 |
| YNL220W | ADE12  | 1.00 | -1.09 | 1.14  | 1.51 |
| YKL059C |        | 1.00 | -1.18 | 1.64  | 1.51 |
| YOR177C | MPC54  | 1.00 | -1.22 | 1.26  | 1.51 |
| YBR025C |        | 1.00 | -1.26 | 1.39  | 1.51 |
| YMR215W |        | 1.00 | -1.31 | 1.37  | 1.51 |
| YOR298W |        | 1.00 | -1.46 | 1.27  | 1.51 |
| YJL188C | BUD19  | 1.00 | -2.00 | 1.26  | 1.51 |
| YGL036W | MTC2   | 1.00 | 1.49  | 1.42  | 1.50 |
| YDL070W | BDF2   | 1.00 | 1.32  | 1.61  | 1.50 |
| YPL086C | ELP3   | 1.00 | 1.32  | 1.60  | 1.50 |



|         |        |      |       |       |      |
|---------|--------|------|-------|-------|------|
| YOR085W | OST3   | 1.00 | 1.28  | 1.83  | 1.50 |
| YOR154W |        | 1.00 | 1.28  | 1.92  | 1.50 |
| YAL040C | CLN3   | 1.00 | 1.17  | 1.16  | 1.50 |
| YER124C |        | 1.00 | 1.17  | 1.39  | 1.50 |
| YDR500C | RPL37B | 1.00 | 1.15  | 1.30  | 1.50 |
| YDR539W |        | 1.00 | 1.13  | 1.11  | 1.50 |
| YLR403W | SFP1   | 1.00 | 1.11  | 1.30  | 1.50 |
| YDR404C | RPB7   | 1.00 | 1.05  | 1.02  | 1.50 |
| YGL022W | STT3   | 1.00 | 1.04  | 1.22  | 1.50 |
| YNL327W | EGT2   | 1.00 | -1.10 | 1.71  | 1.50 |
| YJL158C | CIS3   | 1.00 | -1.26 | 1.52  | 1.50 |
| YGR066C |        | 1.00 | -1.27 | 1.03  | 1.50 |
| YGL259W | YPS5   | 1.00 | -1.28 | -1.18 | 1.50 |
| YOR132W | VPS17  | 1.00 | 1.22  | 1.36  | 1.49 |
| YBR061C |        | 1.00 | 1.12  | 1.17  | 1.49 |
| YDR335W | MSN5   | 1.00 | 1.12  | 1.28  | 1.49 |
| YGL099W | KRE35  | 1.00 | 1.11  | 1.07  | 1.49 |
| YIL161W |        | 1.00 | 1.11  | 1.11  | 1.49 |
| YDR157W |        | 1.00 | 1.09  | 1.04  | 1.49 |
| YOL007C | CSI2   | 1.00 | 1.07  | 1.14  | 1.49 |
| YDR477W | SNF1   | 1.00 | 1.06  | 1.34  | 1.49 |
| YNL238W | KEX2   | 1.00 | 1.04  | 1.08  | 1.49 |
| YPL044C |        | 1.00 | 1.02  | 1.29  | 1.49 |
| YBR263W | SHM1   | 1.00 | -1.08 | 1.33  | 1.49 |
| YNL153C | GIM3   | 1.00 | -1.12 | 1.33  | 1.49 |
| YDL132W | CDC53  | 1.00 | -1.17 | 1.11  | 1.49 |
| YOR329C | SCD5   | 1.00 | -1.19 | 1.32  | 1.49 |
| YLR018C | POM34  | 1.00 | -1.29 | 1.17  | 1.49 |
| YMR229C | RRP5   | 1.00 | -1.29 | 1.24  | 1.49 |
| YDL023C |        | 1.00 | 2.31  | 2.86  | 1.48 |
| YDL002C | NHP10  | 1.00 | 1.40  | 1.30  | 1.48 |
| YMR260C | TIF11  | 1.00 | 1.23  | 1.39  | 1.48 |
| YNL155W |        | 1.00 | 1.17  | 1.58  | 1.48 |
| YHR004C | NEM1   | 1.00 | 1.10  | 1.27  | 1.48 |
| YMR275C | BUL1   | 1.00 | 1.07  | 1.24  | 1.48 |
| YKR048C | NAP1   | 1.00 | 1.01  | 1.18  | 1.48 |
| YFR040W | SAP155 | 1.00 | -1.03 | 1.41  | 1.48 |
| YOR007C | SGT2   | 1.00 | -1.03 | 1.15  | 1.48 |
| YDR186C |        | 1.00 | -1.09 | 1.48  | 1.48 |
| YMR112C | MED11  | 1.00 | -1.14 | -1.01 | 1.48 |
| YML075C | HMG1   | 1.00 | -1.31 | 1.05  | 1.48 |
| YFR042W |        | 1.00 | 1.38  | 1.66  | 1.47 |
| YBR005W |        | 1.00 | 1.30  | 1.18  | 1.47 |
| YDL168W | SFA1   | 1.00 | 1.28  | 1.54  | 1.47 |
| YDR145W | TAF61  | 1.00 | 1.15  | 1.45  | 1.47 |
| YHR019C | DED81  | 1.00 | 1.13  | 1.50  | 1.47 |
| YMR200W | ROT1   | 1.00 | 1.13  | 1.27  | 1.47 |
| YCR072C |        | 1.00 | 1.10  | 1.02  | 1.47 |
| YPR087W |        | 1.00 | 1.10  | 1.30  | 1.47 |
| YFL066C |        | 1.00 | 1.06  | 1.72  | 1.47 |
| YOR160W | MTR10  | 1.00 | 1.04  | 1.23  | 1.47 |
| YMR311C | GLC8   | 1.00 | 1.03  | 1.53  | 1.47 |
| YIL016W | SNL1   | 1.00 | 1.01  | 1.11  | 1.47 |
| YML053C |        | 1.00 | 1.01  | 3.00  | 1.47 |
| YNL118C | DCP2   | 1.00 | -1.02 | 1.34  | 1.47 |
| YML127W | RSC9   | 1.00 | -1.07 | 1.28  | 1.47 |
| YCL011C | GBP2   | 1.00 | -1.11 | 1.09  | 1.47 |
| YNL057W |        | 1.00 | -1.12 | 1.51  | 1.47 |
| YJL111W | CCT7   | 1.00 | -1.13 | 1.49  | 1.47 |
| YER069W | ARG5,6 | 1.00 | -1.14 | -1.06 | 1.47 |
| YPL142C |        | 1.00 | -2.67 | 1.22  | 1.47 |

|         |        |      |       |       |      |
|---------|--------|------|-------|-------|------|
| YOR088W |        | 1.00 | 1.51  | 1.39  | 1.46 |
| YFR050C | PRE4   | 1.00 | 1.27  | 1.62  | 1.46 |
| YHR084W | STE12  | 1.00 | 1.25  | 1.14  | 1.46 |
| YNL281W | HCH1   | 1.00 | 1.19  | 1.14  | 1.46 |
| YGL225W | GOG5   | 1.00 | 1.09  | -1.01 | 1.46 |
| YIL060W |        | 1.00 | 1.06  | 1.77  | 1.46 |
| YLR345W |        | 1.00 | 1.01  | 1.29  | 1.46 |
| YLR051C |        | 1.00 | -1.01 | 1.20  | 1.46 |
| YDL198C | YHM1   | 1.00 | -1.04 | -1.06 | 1.46 |
| YNL084C | END3   | 1.00 | -1.05 | 1.35  | 1.46 |
| YDR188W | CCT6   | 1.00 | -1.09 | 1.13  | 1.46 |
| YLR182W | SWI6   | 1.00 | -1.20 | 1.60  | 1.46 |
| YOR108W |        | 1.00 | -1.26 | 1.46  | 1.46 |
| YDR535C |        | 1.00 | -1.29 | -1.21 | 1.46 |
| YDR253C | MET32  | 1.00 | -1.98 | 1.22  | 1.46 |
| YDR458C |        | 1.00 | -2.67 | 1.27  | 1.46 |
| YDL022W | GPD1   | 1.00 | 2.32  | 2.32  | 1.45 |
| YBL037W | APL3   | 1.00 | 1.49  | 1.49  | 1.45 |
| YBR074W |        | 1.00 | 1.42  | 1.85  | 1.45 |
| YDL015C | TSC13  | 1.00 | 1.41  | 1.68  | 1.45 |
| YCL034W | LSB5   | 1.00 | 1.28  | 1.29  | 1.45 |
| YOL006C | TOP1   | 1.00 | 1.21  | 1.16  | 1.45 |
| YNR076W | PAU6   | 1.00 | 1.20  | 1.36  | 1.45 |
| YNR055C | HOL1   | 1.00 | 1.17  | 1.20  | 1.45 |
| YLR073C |        | 1.00 | 1.13  | 1.23  | 1.45 |
| YGL012W | ERG4   | 1.00 | 1.12  | 1.14  | 1.45 |
| YDR361C | BCP1   | 1.00 | 1.06  | 1.53  | 1.45 |
| YER064C |        | 1.00 | 1.05  | 1.20  | 1.45 |
| YOR168W | GLN4   | 1.00 | -1.04 | 1.58  | 1.45 |
| YMR317W |        | 1.00 | -1.07 | 1.46  | 1.45 |
| YPL092W | SSU1   | 1.00 | -1.07 | -1.10 | 1.45 |
| YDR427W | RPN9   | 1.00 | -1.09 | 1.41  | 1.45 |
| YIR030C | DCG1   | 1.00 | -1.09 | 1.12  | 1.45 |
| YDR033W | MRH1   | 1.00 | -1.10 | 1.08  | 1.45 |
| YAL036C | FUN11  | 1.00 | -1.14 | 1.03  | 1.45 |
| YDR301W | CFT1   | 1.00 | -1.14 | 1.09  | 1.45 |
| YDL182W | LYS20  | 1.00 | -1.22 | -1.01 | 1.45 |
| YDR162C | NBP2   | 1.00 | -1.29 | 1.09  | 1.45 |
| YDL055C | PSA1   | 1.00 | -1.46 | 1.65  | 1.45 |
| YPL199C |        | 1.00 | 1.30  | 1.38  | 1.44 |
| YJL174W | KRE9   | 1.00 | 1.25  | 1.20  | 1.44 |
| YNL244C | SUI1   | 1.00 | 1.23  | 1.09  | 1.44 |
| YLR435W |        | 1.00 | 1.22  | 1.22  | 1.44 |
| YCR023C |        | 1.00 | 1.21  | 1.25  | 1.44 |
| YDR023W | SES1   | 1.00 | 1.18  | 1.41  | 1.44 |
| YJR072C |        | 1.00 | 1.17  | 1.39  | 1.44 |
| YCR057C | PWP2   | 1.00 | 1.14  | -1.02 | 1.44 |
| YKR038C |        | 1.00 | 1.14  | 1.32  | 1.44 |
| YDR349C | YPS7   | 1.00 | 1.07  | 1.21  | 1.44 |
| YKL120W | OAC1   | 1.00 | 1.07  | 1.16  | 1.44 |
| YJL190C | RPS22A | 1.00 | 1.05  | 1.19  | 1.44 |
| YNL263C | YIF1   | 1.00 | 1.04  | 1.35  | 1.44 |
| YPR157W |        | 1.00 | 1.01  | 1.49  | 1.44 |
| YOR259C | RPT4   | 1.00 | -1.01 | 1.44  | 1.44 |
| YJL130C | URA2   | 1.00 | -1.03 | 1.30  | 1.44 |
| YPL052W |        | 1.00 | -1.04 | 2.16  | 1.44 |
| YLR464W |        | 1.00 | -1.17 | 1.15  | 1.44 |
| YMR123W | PKR1   | 1.00 | -1.25 | -1.05 | 1.44 |
| YCL019W |        | 1.00 | -1.27 | 1.19  | 1.44 |
| YLR390W | ECM19  | 1.00 | 1.18  | 1.40  | 1.44 |
| YLR160C | ASP3-4 | 1.00 | 2.01  | 1.93  | 1.43 |

|         |        |      |       |       |      |
|---------|--------|------|-------|-------|------|
| YDL192W | ARF1   | 1.00 | 1.50  | 1.18  | 1.43 |
| YBL083C |        | 1.00 | 1.25  | 1.41  | 1.43 |
| YPR037C | ERV2   | 1.00 | 1.23  | 1.33  | 1.43 |
| YDL100C |        | 1.00 | 1.20  | 1.56  | 1.43 |
| YIL143C | SSL2   | 1.00 | 1.20  | 1.14  | 1.43 |
| YER015W | FAA2   | 1.00 | 1.13  | 1.08  | 1.43 |
| YDR524C | AGE1   | 1.00 | 1.12  | 1.25  | 1.43 |
| YFR034C | PHO4   | 1.00 | 1.11  | 1.26  | 1.43 |
| YHR200W | RPN10  | 1.00 | 1.05  | 1.26  | 1.43 |
| YBR002C | RER2   | 1.00 | 1.03  | 1.09  | 1.43 |
| YOL160W |        | 1.00 | 1.01  | 1.08  | 1.43 |
| YGR049W | SCM4   | 1.00 | -1.01 | 1.35  | 1.43 |
| YOR390W |        | 1.00 | -1.02 | 1.22  | 1.43 |
| YOR119C | RIO1   | 1.00 | -1.07 | 1.28  | 1.43 |
| YGR113W | DAM1   | 1.00 | -1.12 | 1.17  | 1.43 |
| YLR144C | ACF2   | 1.00 | -1.12 | -1.02 | 1.43 |
| YOR260W | GCD1   | 1.00 | -1.19 | 1.49  | 1.43 |
| YHR060W | VMA22  | 1.00 | -1.21 | 1.07  | 1.43 |
| YER103W | SSA4   | 1.00 | -1.54 | -1.06 | 1.43 |
| YJL147C |        | 1.00 | 1.27  | 1.39  | 1.42 |
| YOR261C | RPN8   | 1.00 | 1.27  | 1.76  | 1.42 |
| YLR319C | BUD6   | 1.00 | 1.23  | 1.23  | 1.42 |
| YOR346W | REV1   | 1.00 | 1.20  | 1.57  | 1.42 |
| YIL144W | TID3   | 1.00 | 1.16  | 1.08  | 1.42 |
| YML088W | UFO1   | 1.00 | 1.16  | 1.26  | 1.42 |
| YDL109C |        | 1.00 | 1.14  | 1.30  | 1.42 |
| YIL145C | PAN6   | 1.00 | 1.04  | 1.08  | 1.42 |
| YLR114C | EFR4   | 1.00 | 1.04  | 1.27  | 1.42 |
| YLR381W |        | 1.00 | 1.00  | 1.31  | 1.42 |
| YJR075W | HOC1   | 1.00 | -1.01 | 1.13  | 1.42 |
| YAL026C | DRS2   | 1.00 | -1.04 | 1.11  | 1.42 |
| YPR169W |        | 1.00 | -1.07 | 1.34  | 1.42 |
| YMR049C | ERB1   | 1.00 | -1.09 | 1.06  | 1.42 |
| YLR388W | RPS29A | 1.00 | -1.13 | 1.16  | 1.42 |
| YFR039C |        | 1.00 | -1.14 | 1.24  | 1.42 |
| YMR265C |        | 1.00 | -1.19 | 1.35  | 1.42 |
| YOL141W | PPM2   | 1.00 | -1.46 | 1.18  | 1.42 |
| YOR107W | RGS2   | 1.00 | -2.01 | 1.10  | 1.42 |
| YAR029W |        | 1.00 | 1.29  | 1.38  | 1.41 |
| YLR354C | TAL1   | 1.00 | 1.21  | 1.19  | 1.41 |
| YOL123W | HRP1   | 1.00 | 1.20  | 1.48  | 1.41 |
| YDL207W | GLE1   | 1.00 | 1.18  | 1.35  | 1.41 |
| YFL021W | GAT1   | 1.00 | 1.14  | 1.30  | 1.41 |
| YDL110C |        | 1.00 | 1.13  | 1.07  | 1.41 |
| YPL149W | APG5   | 1.00 | 1.12  | 1.40  | 1.41 |
| YOR022C |        | 1.00 | 1.06  | 1.14  | 1.41 |
| YPL176C |        | 1.00 | 1.01  | 1.12  | 1.41 |
| YOR276W | CAF20  | 1.00 | 1.00  | 1.10  | 1.41 |
| YML099C | ARG81  | 1.00 | -1.04 | 1.31  | 1.41 |
| YDL035C | GPR1   | 1.00 | -1.05 | 1.16  | 1.41 |
| YML082W |        | 1.00 | -1.12 | 1.12  | 1.41 |
| YJL098W | SAP185 | 1.00 | -1.13 | 1.05  | 1.41 |
| YJL050W | MTR4   | 1.00 | -1.14 | 1.09  | 1.41 |
| YNL001W | DOM34  | 1.00 | -1.16 | 1.30  | 1.41 |
| YEL018W |        | 1.00 | -1.25 | 1.10  | 1.41 |
| YMR291W |        | 1.00 | 1.65  | 2.09  | 1.40 |
| YJL060W |        | 1.00 | 1.38  | 1.08  | 1.40 |
| YDR118W | APC4   | 1.00 | 1.34  | 1.50  | 1.40 |
| YDL013W | HEX3   | 1.00 | 1.24  | 1.09  | 1.40 |
| YPL091W | GLR1   | 1.00 | 1.23  | 1.45  | 1.40 |
| YIR042C |        | 1.00 | 1.21  | 1.20  | 1.40 |

|         |         |      |       |       |      |
|---------|---------|------|-------|-------|------|
| YNL004W | HRB1    | 1.00 | 1.20  | 1.46  | 1.40 |
| YGL150C | INO80   | 1.00 | 1.15  | 1.31  | 1.40 |
| YLR172C | DPH5    | 1.00 | 1.12  | 1.26  | 1.40 |
| YOR337W | TEA1    | 1.00 | 1.07  | -1.19 | 1.40 |
| YHR161C | YAP1801 | 1.00 | 1.06  | 1.52  | 1.40 |
| YOR330C | MIP1    | 1.00 | 1.05  | 1.32  | 1.40 |
| YFR037C | RSC8    | 1.00 | -1.01 | 1.25  | 1.40 |
| YIL128W | MET18   | 1.00 | -1.01 | 1.31  | 1.40 |
| YNR015W | SMM1    | 1.00 | -1.01 | 1.27  | 1.40 |
| YPR174C |         | 1.00 | -1.02 | 1.16  | 1.40 |
| YJL171C |         | 1.00 | -1.08 | 1.19  | 1.40 |
| YLR086W | SMC4    | 1.00 | -1.08 | 1.33  | 1.40 |
| YGR190C |         | 1.00 | -1.09 | 1.27  | 1.40 |
| YGL213C | SKI8    | 1.00 | -1.10 | 1.14  | 1.40 |
| YNL082W | PMS1    | 1.00 | -2.21 | 1.16  | 1.40 |
| YGR241C | YAP1802 | 1.00 | 1.23  | 1.32  | 1.39 |
| YFL020C | PAU5    | 1.00 | 1.21  | 1.31  | 1.39 |
| YHR055C | CUP1-2  | 1.00 | 1.21  | 2.33  | 1.39 |
| YDL241W |         | 1.00 | 1.17  | 1.34  | 1.39 |
| YMR014W | BUD22   | 1.00 | 1.12  | 1.43  | 1.39 |
| YIL127C |         | 1.00 | 1.11  | 1.22  | 1.39 |
| YPR167C | MET16   | 1.00 | 1.10  | 1.07  | 1.39 |
| YPL137C |         | 1.00 | 1.05  | -1.01 | 1.39 |
| YPR204W |         | 1.00 | 1.00  | 1.28  | 1.39 |
| YML076C |         | 1.00 | -1.09 | 1.23  | 1.39 |
| YGL253W | HXK2    | 1.00 | -1.11 | 1.42  | 1.39 |
| YDL119C |         | 1.00 | -1.31 | -1.16 | 1.39 |
| YFL022C | FRS2    | 1.00 | -1.31 | 1.00  | 1.39 |
| YMR214W | SCJ1    | 1.00 | -1.41 | 1.15  | 1.39 |
| YGL023C | PIB2    | 1.00 | -1.42 | 1.17  | 1.39 |
| YGR185C | TYS1    | 1.00 | -1.48 | 1.11  | 1.39 |
| YGL011C | SCL1    | 1.00 | -1.53 | 1.20  | 1.39 |
| YDL124W |         | 1.00 | 1.53  | 1.55  | 1.38 |
| YIL062C | ARC15   | 1.00 | 1.45  | 1.58  | 1.38 |
| YCR045C |         | 1.00 | 1.42  | 1.35  | 1.38 |
| YDL012C |         | 1.00 | 1.30  | 1.17  | 1.38 |
| YGL198W |         | 1.00 | 1.26  | 1.12  | 1.38 |
| YKR045C |         | 1.00 | 1.26  | 1.15  | 1.38 |
| YAL037W |         | 1.00 | 1.25  | 1.19  | 1.38 |
| YDR408C | ADE8    | 1.00 | 1.14  | 1.10  | 1.38 |
| YDR223W |         | 1.00 | 1.13  | 1.47  | 1.38 |
| YER101C | AST2    | 1.00 | 1.07  | 1.11  | 1.38 |
| YOL095C | HMI1    | 1.00 | 1.04  | 1.19  | 1.38 |
| YEL053C | MAK10   | 1.00 | -1.04 | -1.02 | 1.38 |
| YDL071C |         | 1.00 | -1.05 | 1.19  | 1.38 |
| YLR424W |         | 1.00 | -1.10 | 1.32  | 1.38 |
| YNL091W |         | 1.00 | -1.11 | 1.36  | 1.38 |
| YEL001C |         | 1.00 | -1.13 | -1.02 | 1.38 |
| YOR270C | VPH1    | 1.00 | -1.13 | 1.25  | 1.38 |
| YPR066W | UBA3    | 1.00 | -1.13 | 1.25  | 1.38 |
| YGR211W | ZPR1    | 1.00 | -1.18 | 1.22  | 1.38 |
| YGL228W | SHE10   | 1.00 | -1.19 | 1.18  | 1.38 |
| YHR003C |         | 1.00 | -1.27 | 1.17  | 1.38 |
| YOR165W |         | 1.00 | -1.33 | 1.09  | 1.38 |
| YKL172W | EBP2    | 1.00 | -1.54 | -1.21 | 1.38 |
| YAL005C | SSA1    | 1.00 | -1.97 | -1.57 | 1.38 |
| YDL024C | DIA3    | 1.00 | 1.96  | 1.89  | 1.37 |
| YDL155W | CLB3    | 1.00 | 1.28  | 1.34  | 1.37 |
| YIL140W | AXL2    | 1.00 | 1.26  | 1.49  | 1.37 |
| YMR130W |         | 1.00 | 1.22  | 1.20  | 1.37 |
| YDR211W | GCD6    | 1.00 | 1.20  | 1.39  | 1.37 |

|         |        |      |       |       |      |
|---------|--------|------|-------|-------|------|
| YEL027W | CUP5   | 1.00 | 1.19  | -1.04 | 1.37 |
| YOL145C | CTR9   | 1.00 | 1.19  | 1.33  | 1.37 |
| YBR156C | SLI15  | 1.00 | 1.17  | 1.32  | 1.37 |
| YGR143W | SKN1   | 1.00 | 1.13  | 1.27  | 1.37 |
| YOL038W | PRE6   | 1.00 | 1.13  | 1.44  | 1.37 |
| YOL093W |        | 1.00 | 1.13  | 1.23  | 1.37 |
| YAL015C | NTG1   | 1.00 | 1.12  | 1.17  | 1.37 |
| YPR121W | THI22  | 1.00 | 1.10  | 1.41  | 1.37 |
| YPR137W | RRP9   | 1.00 | 1.10  | -1.01 | 1.37 |
| YBL011W | SCT1   | 1.00 | 1.09  | 1.29  | 1.37 |
| YGL111W |        | 1.00 | 1.09  | 1.20  | 1.37 |
| YOL049W | GSH2   | 1.00 | 1.08  | 1.24  | 1.37 |
| YMR211W |        | 1.00 | 1.04  | 1.16  | 1.37 |
| YGL209W | MIG2   | 1.00 | 1.03  | 1.13  | 1.37 |
| YHR159W |        | 1.00 | -1.02 | 1.09  | 1.37 |
| YMR310C |        | 1.00 | -1.15 | 1.22  | 1.37 |
| YPL012W | RRP12  | 1.00 | -1.17 | 1.04  | 1.37 |
| YBR292C |        | 1.00 | -1.20 | -1.14 | 1.37 |
| YNL189W | SRP1   | 1.00 | -1.21 | 1.14  | 1.37 |
| YMR113W | FOL3   | 1.00 | -1.36 | 2.18  | 1.37 |
| YMR179W | SPT21  | 1.00 | -1.42 | -1.10 | 1.37 |
| YFL065C |        | 1.00 | -1.46 | 1.09  | 1.37 |
| YPL160W | CDC60  | 1.00 | -1.52 | -1.09 | 1.37 |
| YGR168C |        | 1.00 | -1.74 | 1.06  | 1.37 |
| YDR471W | RPL27B | 1.00 | 1.62  | 1.73  | 1.36 |
| YIL152W |        | 1.00 | 1.48  | 2.15  | 1.36 |
| YLR262C | YPT6   | 1.00 | 1.26  | 1.17  | 1.36 |
| YGL016W | KAP122 | 1.00 | 1.19  | 1.13  | 1.36 |
| YGL159W |        | 1.00 | 1.19  | 1.27  | 1.36 |
| YBR155W | CNS1   | 1.00 | 1.15  | 1.11  | 1.36 |
| YLR099C | ICT1   | 1.00 | 1.15  | 1.34  | 1.36 |
| YIL043C | CBR1   | 1.00 | 1.14  | 1.31  | 1.36 |
| YKR023W |        | 1.00 | 1.12  | 1.28  | 1.36 |
| YOR171C | LCB4   | 1.00 | 1.10  | 1.20  | 1.36 |
| YLR023C |        | 1.00 | 1.07  | 1.44  | 1.36 |
| YOL137W |        | 1.00 | 1.02  | 1.12  | 1.36 |
| YIL173W | VTH1   | 1.00 | -1.01 | 1.26  | 1.36 |
| YJL116C | NCA3   | 1.00 | -1.01 | 1.25  | 1.36 |
| YCR016W |        | 1.00 | -1.09 | 1.22  | 1.36 |
| YGR229C | SMI1   | 1.00 | -1.11 | 1.39  | 1.36 |
| YNR065C |        | 1.00 | -1.13 | 1.08  | 1.36 |
| YMR055C | BUB2   | 1.00 | -1.17 | 1.32  | 1.36 |
| YGR065C | VHT1   | 1.00 | -1.18 | -1.07 | 1.36 |
| YDL121C |        | 1.00 | -1.32 | -1.19 | 1.36 |
| YFL054C |        | 1.00 | 1.50  | 1.41  | 1.35 |
| YDL086W |        | 1.00 | 1.28  | 1.51  | 1.35 |
| YPL065W | VPS28  | 1.00 | 1.22  | 1.26  | 1.35 |
| YLR379W |        | 1.00 | 1.20  | 1.56  | 1.35 |
| YLR263W | RED1   | 1.00 | 1.16  | 1.26  | 1.35 |
| YML115C | VAN1   | 1.00 | 1.13  | 1.35  | 1.35 |
| YFR009W | GCN20  | 1.00 | 1.11  | 1.36  | 1.35 |
| YIR026C | YVH1   | 1.00 | 1.08  | 1.08  | 1.35 |
| YJR114W |        | 1.00 | 1.08  | 1.16  | 1.35 |
| YKR027W |        | 1.00 | 1.07  | 1.26  | 1.35 |
| YER151C | UBP3   | 1.00 | 1.06  | 1.13  | 1.35 |
| YER113C |        | 1.00 | 1.05  | 1.13  | 1.35 |
| YLR005W | SSL1   | 1.00 | 1.05  | -1.01 | 1.35 |
| YGL110C |        | 1.00 | 1.01  | 1.07  | 1.35 |
| YNR026C | SEC12  | 1.00 | -1.02 | 1.08  | 1.35 |
| YDL001W |        | 1.00 | -1.03 | 1.06  | 1.35 |
| YMR037C | MSN2   | 1.00 | -1.03 | 1.22  | 1.35 |



|         |        |      |       |       |      |
|---------|--------|------|-------|-------|------|
| YEL013W | VAC8   | 1.00 | -1.05 | 1.15  | 1.35 |
| YOL019W | TOS7   | 1.00 | -1.09 | 1.04  | 1.35 |
| YOL068C | HST1   | 1.00 | -1.11 | 1.14  | 1.35 |
| YDR399W | HPT1   | 1.00 | -1.13 | -1.28 | 1.35 |
| YHL046C |        | 1.00 | -1.21 | 1.01  | 1.35 |
| YHR128W | FUR1   | 1.00 | -1.28 | 1.23  | 1.35 |
| YPL083C | SEN54  | 1.00 | -1.35 | 1.21  | 1.35 |
| YLR161W |        | 1.00 | -1.36 | 1.09  | 1.35 |
| YER061C | CEM1   | 1.00 | -1.57 | 1.01  | 1.35 |
| YLR179C |        | 1.00 | 1.40  | 1.27  | 1.34 |
| YCL049C |        | 1.00 | 1.20  | 1.16  | 1.34 |
| YML080W | DUS1   | 1.00 | 1.18  | 1.09  | 1.34 |
| YLR373C | VID22  | 1.00 | 1.16  | 1.15  | 1.34 |
| YGL242C |        | 1.00 | 1.15  | 1.24  | 1.34 |
| YJR126C |        | 1.00 | 1.14  | 1.24  | 1.34 |
| YPL240C | HSP82  | 1.00 | 1.12  | 1.71  | 1.34 |
| YGR150C |        | 1.00 | 1.11  | 1.24  | 1.34 |
| YBL087C | RPL23A | 1.00 | 1.08  | -1.12 | 1.34 |
| YKR039W | GAP1   | 1.00 | 1.08  | 1.08  | 1.34 |
| YNL163C | RIA1   | 1.00 | 1.08  | -1.26 | 1.34 |
| YPL084W | BRO1   | 1.00 | 1.05  | 1.14  | 1.34 |
| YMR316W | DIA1   | 1.00 | 1.03  | 1.09  | 1.34 |
| YLR463C |        | 1.00 | 1.01  | 1.61  | 1.34 |
| YLR291C | GCD7   | 1.00 | -1.01 | 1.21  | 1.34 |
| YOR072W |        | 1.00 | -1.02 | 1.36  | 1.34 |
| YDR106W | ARP10  | 1.00 | -1.16 | 1.28  | 1.34 |
| YGL021W | ALK1   | 1.00 | -1.16 | 1.07  | 1.34 |
| YER047C | SAP1   | 1.00 | -1.20 | -1.19 | 1.34 |
| YLR255C |        | 1.00 | -1.26 | 1.12  | 1.34 |
| YKR064W |        | 1.00 | 1.76  | 1.72  | 1.33 |
| YBR228W | SLX1   | 1.00 | 1.27  | 1.32  | 1.33 |
| YJR018W |        | 1.00 | 1.25  | 1.25  | 1.33 |
| YOL080C | REX4   | 1.00 | 1.23  | 1.01  | 1.33 |
| YOL159C |        | 1.00 | 1.22  | 1.32  | 1.33 |
| YDR105C |        | 1.00 | 1.21  | 1.42  | 1.33 |
| YER145C | FTR1   | 1.00 | 1.20  | 1.08  | 1.33 |
| YGL254W | FZF1   | 1.00 | 1.18  | 1.13  | 1.33 |
| YHR194W |        | 1.00 | 1.18  | 1.25  | 1.33 |
| YER189W |        | 1.00 | 1.16  | 1.38  | 1.33 |
| YJL029C | VPS53  | 1.00 | 1.16  | 1.14  | 1.33 |
| YOL094C | RFC4   | 1.00 | 1.16  | 1.18  | 1.33 |
| YNL250W | RAD50  | 1.00 | 1.12  | 1.34  | 1.33 |
| YOR034C | AKR2   | 1.00 | 1.12  | 1.24  | 1.33 |
| YML132W | COS3   | 1.00 | 1.07  | 1.68  | 1.33 |
| YCR002C | CDC10  | 1.00 | 1.06  | 1.54  | 1.33 |
| YPR085C |        | 1.00 | 1.06  | 1.04  | 1.33 |
| YJL001W | PRE3   | 1.00 | 1.05  | 1.29  | 1.33 |
| YJL076W | NET1   | 1.00 | 1.05  | 1.14  | 1.33 |
| YJL198W | PHO90  | 1.00 | 1.05  | 1.37  | 1.33 |
| YMR020W | FMS1   | 1.00 | 1.05  | 1.15  | 1.33 |
| YPL126W | NAN1   | 1.00 | 1.04  | 1.14  | 1.33 |
| YPL179W | PPQ1   | 1.00 | 1.03  | 1.54  | 1.33 |
| YBL113C |        | 1.00 | 1.02  | 1.14  | 1.33 |
| YLR089C |        | 1.00 | -1.05 | 1.18  | 1.33 |
| YFR036W | CDC26  | 1.00 | -1.11 | 1.08  | 1.33 |
| YDR187C |        | 1.00 | -1.12 | 1.00  | 1.33 |
| YLR083C | EMP70  | 1.00 | -1.15 | -1.01 | 1.33 |
| YGR130C |        | 1.00 | -1.16 | 1.34  | 1.33 |
| YEL051W | VMA8   | 1.00 | -1.24 | 1.61  | 1.33 |
| YOR303W | CPA1   | 1.00 | -1.44 | -1.30 | 1.33 |
| YGR253C | PUP2   | 1.00 | -1.65 | -1.05 | 1.33 |

|         |        |      |       |       |      |
|---------|--------|------|-------|-------|------|
| YOR015W |        | 1.00 | 1.44  | 1.61  | 1.32 |
| YHR104W | GRE3   | 1.00 | 1.38  | 1.60  | 1.32 |
| YPL053C | KTR6   | 1.00 | 1.29  | 1.38  | 1.32 |
| YGR245C | SDA1   | 1.00 | 1.25  | 1.68  | 1.32 |
| YBR042C |        | 1.00 | 1.24  | 1.32  | 1.32 |
| YER177W | BMH1   | 1.00 | 1.21  | 1.43  | 1.32 |
| YOL031C |        | 1.00 | 1.18  | 1.40  | 1.32 |
| YOR098C | NUP1   | 1.00 | 1.14  | 1.31  | 1.32 |
| YCR106W |        | 1.00 | 1.12  | 1.39  | 1.32 |
| YPL050C | MNN9   | 1.00 | 1.12  | 1.25  | 1.32 |
| YHR175W | CTR2   | 1.00 | 1.11  | 1.29  | 1.32 |
| YGL195W | GCN1   | 1.00 | 1.07  | -1.01 | 1.32 |
| YMR154C | RIM13  | 1.00 | 1.04  | 1.07  | 1.32 |
| YOL144W | NOP8   | 1.00 | 1.04  | 1.46  | 1.32 |
| YPL243W | SRP68  | 1.00 | 1.03  | 1.30  | 1.32 |
| YLR219W | MSC3   | 1.00 | 1.02  | 1.27  | 1.32 |
| YPR050C |        | 1.00 | 1.02  | 1.15  | 1.32 |
| YDL084W | SUB2   | 1.00 | -1.03 | 1.24  | 1.32 |
| YDR357C |        | 1.00 | -1.03 | 1.36  | 1.32 |
| YMR227C | TAF67  | 1.00 | -1.05 | 1.11  | 1.32 |
| YLR198C |        | 1.00 | -1.08 | 1.38  | 1.32 |
| YPL184C |        | 1.00 | -1.10 | 1.06  | 1.32 |
| YGR276C | RNH70  | 1.00 | -1.11 | 1.27  | 1.32 |
| YOR059C |        | 1.00 | -1.11 | 1.31  | 1.32 |
| YGR036C | CAX4   | 1.00 | -1.14 | 1.09  | 1.32 |
| YEL075C |        | 1.00 | -1.16 | 1.33  | 1.32 |
| YGR288W | MAL13  | 1.00 | -1.16 | 1.14  | 1.32 |
| YHR081W |        | 1.00 | -1.52 | 1.02  | 1.32 |
| YDL066W | IDP1   | 1.00 | -1.96 | -1.11 | 1.32 |
| YJL189W | RPL39  | 1.00 | 1.54  | 2.03  | 1.31 |
| YHR192W |        | 1.00 | 1.26  | 1.26  | 1.31 |
| YPL159C |        | 1.00 | 1.22  | 1.39  | 1.31 |
| YPL088W |        | 1.00 | 1.21  | 1.31  | 1.31 |
| YAR030C |        | 1.00 | 1.20  | 1.38  | 1.31 |
| YNL158W |        | 1.00 | 1.19  | 1.40  | 1.31 |
| YHL016C | DUR3   | 1.00 | 1.18  | 1.77  | 1.31 |
| YPL122C | TFB2   | 1.00 | 1.17  | 1.23  | 1.31 |
| YBR063C |        | 1.00 | 1.14  | 1.22  | 1.31 |
| YIL038C | NOT3   | 1.00 | 1.13  | 1.26  | 1.31 |
| YCR048W | ARE1   | 1.00 | 1.11  | 1.09  | 1.31 |
| YNL113W | RPC19  | 1.00 | 1.09  | 1.00  | 1.31 |
| YNR024W |        | 1.00 | 1.08  | 1.20  | 1.31 |
| YDR503C | LPP1   | 1.00 | 1.07  | 1.13  | 1.31 |
| YLR330W | CHS5   | 1.00 | 1.06  | 1.19  | 1.31 |
| YKR105C |        | 1.00 | 1.03  | 1.11  | 1.31 |
| YNR012W | URK1   | 1.00 | 1.03  | 1.15  | 1.31 |
| YNL179C |        | 1.00 | 1.01  | 1.35  | 1.31 |
| YNL279W | PRM1   | 1.00 | -1.02 | 1.33  | 1.31 |
| YHR089C | GAR1   | 1.00 | -1.06 | 1.07  | 1.31 |
| YJL034W | KAR2   | 1.00 | -1.06 | 1.09  | 1.31 |
| YER136W | GDI1   | 1.00 | -1.08 | 1.34  | 1.31 |
| YOR060C |        | 1.00 | -1.16 | 1.01  | 1.31 |
| YOR294W | RRS1   | 1.00 | -1.19 | 1.00  | 1.31 |
| YKL106W | AAT1   | 1.00 | -1.27 | -1.19 | 1.31 |
| YLL033W |        | 1.00 | 1.42  | 1.42  | 1.30 |
| YBR274W | CHK1   | 1.00 | 1.25  | 1.28  | 1.30 |
| YLR158C | ASP3-3 | 1.00 | 1.19  | 1.29  | 1.30 |
| YER088C | DOT6   | 1.00 | 1.14  | 1.56  | 1.30 |
| YCL002C |        | 1.00 | 1.13  | 1.17  | 1.30 |
| YLR078C | BOS1   | 1.00 | 1.13  | 1.23  | 1.30 |
| YDL006W | PTC1   | 1.00 | 1.12  | 1.15  | 1.30 |

|         |        |      |       |       |      |
|---------|--------|------|-------|-------|------|
| YJL065C |        | 1.00 | 1.12  | 1.25  | 1.30 |
| YOR370C | MRS6   | 1.00 | 1.10  | 1.49  | 1.30 |
| YOL020W | TAT2   | 1.00 | 1.07  | 1.10  | 1.30 |
| YGR043C |        | 1.00 | 1.06  | 1.06  | 1.30 |
| YDL003W | MCD1   | 1.00 | 1.04  | 1.19  | 1.30 |
| YER046W | SPO73  | 1.00 | 1.00  | 1.00  | 1.30 |
| YOR146W |        | 1.00 | 1.00  | 1.27  | 1.30 |
| YIR020C |        | 1.00 | -1.01 | 1.33  | 1.30 |
| YOL067C | RTG1   | 1.00 | -1.01 | 1.16  | 1.30 |
| YLR102C | APC9   | 1.00 | -1.02 | 1.66  | 1.30 |
| YKL184W | SPE1   | 1.00 | -1.05 | 1.07  | 1.30 |
| YPL095C |        | 1.00 | -1.06 | 1.18  | 1.30 |
| YLR467W | YRF1-5 | 1.00 | -1.07 | 1.36  | 1.30 |
| YPL001W | HAT1   | 1.00 | -1.10 | 1.22  | 1.30 |
| YJL109C |        | 1.00 | -1.12 | -1.02 | 1.30 |
| YMR044W | IOC4   | 1.00 | -1.12 | 1.09  | 1.30 |
| YEL035C | UTR5   | 1.00 | -1.15 | -1.17 | 1.30 |
| YBR141C |        | 1.00 | -1.17 | -1.09 | 1.30 |
| YDR360W |        | 1.00 | -1.18 | 1.13  | 1.30 |
| YLR244C | MAP1   | 1.00 | -1.18 | 1.10  | 1.30 |
| YDR331W | GPI8   | 1.00 | -1.23 | 1.01  | 1.30 |
| YGR091W | PRP31  | 1.00 | -1.28 | 1.12  | 1.30 |
| YLR272C | YCS4   | 1.00 | -1.40 | 1.12  | 1.30 |
| YOL166C |        | 1.00 | -1.54 | -1.18 | 1.30 |
| YBR084W | MIS1   | 1.00 | -1.61 | -1.28 | 1.30 |
| YCL007C | CWH36  | 1.00 | 1.35  | 1.40  | 1.29 |
| YJL151C | SNA3   | 1.00 | 1.31  | 1.24  | 1.29 |
| YDL188C | PPH22  | 1.00 | 1.27  | 1.19  | 1.29 |
| YJL044C | GYP6   | 1.00 | 1.23  | 1.20  | 1.29 |
| YOR305W |        | 1.00 | 1.20  | 1.17  | 1.29 |
| YER159C | BUR6   | 1.00 | 1.16  | 1.09  | 1.29 |
| YPR101W | SNT309 | 1.00 | 1.13  | 1.30  | 1.29 |
| YIL025C |        | 1.00 | 1.11  | 1.08  | 1.29 |
| YDR222W |        | 1.00 | 1.10  | 1.39  | 1.29 |
| YLL026W | HSP104 | 1.00 | 1.07  | 1.22  | 1.29 |
| YOR203W |        | 1.00 | 1.06  | 1.20  | 1.29 |
| YER078C |        | 1.00 | 1.05  | 1.12  | 1.29 |
| YOR210W | RPB10  | 1.00 | 1.03  | 1.09  | 1.29 |
| YLR190W |        | 1.00 | -1.01 | 1.03  | 1.29 |
| YNL285W |        | 1.00 | -1.02 | 1.17  | 1.29 |
| YLR452C | SST2   | 1.00 | -1.03 | -1.02 | 1.29 |
| YJL073W | JEM1   | 1.00 | -1.04 | 1.00  | 1.29 |
| YFL042C |        | 1.00 | -1.05 | 1.06  | 1.29 |
| YHR108W | GGA2   | 1.00 | -1.05 | 1.33  | 1.29 |
| YLR006C | SSK1   | 1.00 | -1.05 | 1.11  | 1.29 |
| YOL028C | YAP7   | 1.00 | -1.05 | 1.13  | 1.29 |
| YJL042W | MHP1   | 1.00 | -1.13 | -1.40 | 1.29 |
| YLR236C |        | 1.00 | -1.15 | -1.14 | 1.29 |
| YPL163C | SVS1   | 1.00 | -1.15 | 1.18  | 1.29 |
| YDL122W | UBP1   | 1.00 | -1.18 | -1.13 | 1.29 |
| YMR295C |        | 1.00 | -1.19 | 1.02  | 1.29 |
| YHR169W | DBP8   | 1.00 | -1.22 | -1.28 | 1.29 |
| YKL001C | MET14  | 1.00 | -1.39 | 1.01  | 1.29 |
| YOR189W | IES4   | 1.00 | -1.46 | 1.01  | 1.29 |
| YLR257W |        | 1.00 | 1.43  | 1.58  | 1.28 |
| YBR064W |        | 1.00 | 1.41  | 1.28  | 1.28 |
| YDR171W | HSP42  | 1.00 | 1.40  | 1.85  | 1.28 |
| YBR123C | TFC1   | 1.00 | 1.39  | 1.36  | 1.28 |
| YEL038W | UTR4   | 1.00 | 1.37  | 1.51  | 1.28 |
| YOL106W |        | 1.00 | 1.28  | 1.84  | 1.28 |
| YPR176C | BET2   | 1.00 | 1.28  | 1.34  | 1.28 |

|         |        |      |       |       |      |
|---------|--------|------|-------|-------|------|
| YDR202C | RAV2   | 1.00 | 1.22  | 1.25  | 1.28 |
| YOR384W | FRE5   | 1.00 | 1.22  | 1.13  | 1.28 |
| YGR058W |        | 1.00 | 1.21  | 1.30  | 1.28 |
| YJL055W |        | 1.00 | 1.16  | 1.22  | 1.28 |
| YBR133C | HSL7   | 1.00 | 1.15  | 1.15  | 1.28 |
| YDR488C | PAC11  | 1.00 | 1.15  | 1.85  | 1.28 |
| YBR135W | CKS1   | 1.00 | 1.14  | 1.24  | 1.28 |
| YIL132C | CSM2   | 1.00 | 1.14  | -1.08 | 1.28 |
| YFL027C | GYP8   | 1.00 | 1.13  | 1.28  | 1.28 |
| YML011C |        | 1.00 | 1.13  | 1.34  | 1.28 |
| YDR478W | SNM1   | 1.00 | 1.12  | 1.16  | 1.28 |
| YIR011C | STS1   | 1.00 | 1.11  | 1.33  | 1.28 |
| YMR269W |        | 1.00 | 1.10  | 1.30  | 1.28 |
| YEL025C | SRI1   | 1.00 | 1.08  | 1.04  | 1.28 |
| YDL160C | DHH1   | 1.00 | 1.06  | 1.37  | 1.28 |
| YBL024W | NCL1   | 1.00 | 1.05  | 1.10  | 1.28 |
| YOR251C |        | 1.00 | 1.05  | 1.22  | 1.28 |
| YOR360C | PDE2   | 1.00 | 1.05  | -1.07 | 1.28 |
| YDL201W |        | 1.00 | 1.03  | 1.02  | 1.28 |
| YER019W | ISC1   | 1.00 | 1.03  | 1.29  | 1.28 |
| YGL113W | SLD3   | 1.00 | 1.03  | 1.06  | 1.28 |
| YGL241W | KAP114 | 1.00 | 1.03  | 1.18  | 1.28 |
| YER176W | ECM32  | 1.00 | 1.00  | 1.18  | 1.28 |
| YDR040C | ENA1   | 1.00 | -1.02 | 1.13  | 1.28 |
| YOL037C |        | 1.00 | -1.03 | 1.32  | 1.28 |
| YBR239C |        | 1.00 | -1.04 | 1.15  | 1.28 |
| YHR027C | RPN1   | 1.00 | -1.04 | 1.36  | 1.28 |
| YKL068W | NUP100 | 1.00 | -1.04 | -1.13 | 1.28 |
| YLR347C | KAP95  | 1.00 | -1.07 | 1.07  | 1.28 |
| YBR142W | MAK5   | 1.00 | -1.08 | 1.06  | 1.28 |
| YLR002C | NOC3   | 1.00 | -1.09 | 1.06  | 1.28 |
| YKR072C | SIS2   | 1.00 | -1.17 | 1.09  | 1.28 |
| YOR068C |        | 1.00 | -1.18 | 1.66  | 1.28 |
| YER086W | ILV1   | 1.00 | -1.24 | -1.18 | 1.28 |
| YBL081W |        | 1.00 | -1.31 | -1.09 | 1.28 |
| YFL009W | CDC4   | 1.00 | -1.35 | 1.10  | 1.28 |
| YKL096W | CWP1   | 1.00 | 1.45  | 1.43  | 1.27 |
| YHR183W | GND1   | 1.00 | 1.51  | 1.12  | 1.27 |
| YLR332W | MID2   | 1.00 | 1.34  | 1.40  | 1.27 |
| YBR203W |        | 1.00 | 1.32  | 1.24  | 1.27 |
| YBL085W | BOI1   | 1.00 | 1.26  | 1.43  | 1.27 |
| YBL063W | KIP1   | 1.00 | 1.23  | 1.47  | 1.27 |
| YFL062W | COS4   | 1.00 | 1.23  | 1.35  | 1.27 |
| YPL232W | SSO1   | 1.00 | 1.18  | 1.54  | 1.27 |
| YNL275W |        | 1.00 | 1.12  | 1.02  | 1.27 |
| YAL002W | VPS8   | 1.00 | 1.10  | 1.12  | 1.27 |
| YDR109C |        | 1.00 | 1.08  | 1.23  | 1.27 |
| YDR474C |        | 1.00 | 1.08  | 1.15  | 1.27 |
| YDR071C |        | 1.00 | 1.07  | 1.47  | 1.27 |
| YNL217W |        | 1.00 | 1.07  | 1.00  | 1.27 |
| YPL244C | HUT1   | 1.00 | 1.06  | 1.27  | 1.27 |
| YIL153W | RRD1   | 1.00 | 1.05  | 1.25  | 1.27 |
| YPL011C | TAF47  | 1.00 | 1.02  | 1.06  | 1.27 |
| YOL036W |        | 1.00 | -1.03 | 1.16  | 1.27 |
| YDL117W | CYK3   | 1.00 | -1.09 | 1.16  | 1.27 |
| YIL091C |        | 1.00 | -1.10 | 1.00  | 1.27 |
| YDR300C | PRO1   | 1.00 | -1.37 | 1.08  | 1.27 |
| YPL119C | DBP1   | 1.00 | -1.46 | 1.16  | 1.27 |
| YNL135C | FPR1   | 1.00 | 1.52  | 1.53  | 1.26 |
| YDR169C | STB3   | 1.00 | 1.25  | 1.23  | 1.26 |
| YPL158C |        | 1.00 | 1.18  | 1.46  | 1.26 |

|         |        |      |       |       |      |
|---------|--------|------|-------|-------|------|
| YGR158C | MTR3   | 1.00 | 1.17  | 1.10  | 1.26 |
| YDL152W |        | 1.00 | 1.15  | 1.46  | 1.26 |
| YMR036C | MIH1   | 1.00 | 1.14  | 1.11  | 1.26 |
| YJL069C |        | 1.00 | 1.12  | -1.09 | 1.26 |
| YNR046W |        | 1.00 | 1.10  | 1.13  | 1.26 |
| YGR144W | THI4   | 1.00 | 1.09  | 1.01  | 1.26 |
| YMR039C | SUB1   | 1.00 | 1.07  | 1.24  | 1.26 |
| YNL307C | MCK1   | 1.00 | 1.06  | 1.31  | 1.26 |
| YOL070C |        | 1.00 | 1.06  | 1.24  | 1.26 |
| YDR407C | TRS120 | 1.00 | 1.05  | 1.12  | 1.26 |
| YOR355W | GDS1   | 1.00 | 1.04  | 1.70  | 1.26 |
| YDR348C |        | 1.00 | 1.03  | 1.17  | 1.26 |
| YJL123C |        | 1.00 | 1.03  | 1.45  | 1.26 |
| YPR058W | YMC1   | 1.00 | 1.01  | 1.06  | 1.26 |
| YIR041W |        | 1.00 | 1.00  | 1.19  | 1.26 |
| YLR412W |        | 1.00 | -1.01 | 1.20  | 1.26 |
| YJL088W | ARG3   | 1.00 | -1.02 | 1.05  | 1.26 |
| YPR061C |        | 1.00 | -1.03 | 1.12  | 1.26 |
| YDR481C | PHO8   | 1.00 | -1.04 | 1.11  | 1.26 |
| YKL095W | YJU2   | 1.00 | -1.04 | 1.05  | 1.26 |
| YLR241W |        | 1.00 | -1.04 | 1.01  | 1.26 |
| YHL050C |        | 1.00 | -1.07 | 1.28  | 1.26 |
| YDR412W |        | 1.00 | -1.09 | 1.13  | 1.26 |
| YPL136W |        | 1.00 | -1.11 | 1.01  | 1.26 |
| YGR112W | SHY1   | 1.00 | -1.12 | 1.11  | 1.26 |
| YNL166C | BNI5   | 1.00 | -1.14 | 1.16  | 1.26 |
| YLR261C |        | 1.00 | -1.15 | 1.07  | 1.26 |
| YFL028C | CAF16  | 1.00 | -1.29 | 1.21  | 1.26 |
| YML125C |        | 1.00 | -1.32 | -1.17 | 1.26 |
| YJL080C | SCP160 | 1.00 | -1.44 | 1.17  | 1.26 |
| YLR252W |        | 1.00 | -1.51 | 1.03  | 1.26 |
| YML109W | ZDS2   | 1.00 | -1.51 | 1.21  | 1.26 |
| YLR457C | NBP1   | 1.00 | -2.10 | 1.05  | 1.26 |
| YDR133C |        | 1.00 | 1.66  | 1.91  | 1.25 |
| YBR030W |        | 1.00 | 1.24  | 1.28  | 1.25 |
| YAL014C |        | 1.00 | 1.21  | 1.27  | 1.25 |
| YGL137W | SEC27  | 1.00 | 1.21  | 1.45  | 1.25 |
| YML048W | GSF2   | 1.00 | 1.20  | 1.48  | 1.25 |
| YDL040C | NAT1   | 1.00 | 1.13  | 1.24  | 1.25 |
| YDR281C | PHM6   | 1.00 | 1.13  | 1.14  | 1.25 |
| YGL101W |        | 1.00 | 1.13  | 1.06  | 1.25 |
| YGL248W | PDE1   | 1.00 | 1.13  | 1.02  | 1.25 |
| YOR157C | PUP1   | 1.00 | 1.11  | 1.44  | 1.25 |
| YEL049W | PAU2   | 1.00 | 1.09  | -1.02 | 1.25 |
| YDR400W | URH1   | 1.00 | 1.08  | 1.21  | 1.25 |
| YIL108W |        | 1.00 | 1.06  | 1.09  | 1.25 |
| YDR394W | RPT3   | 1.00 | 1.05  | 1.32  | 1.25 |
| YDL170W | UGA3   | 1.00 | 1.04  | 1.14  | 1.25 |
| YDL179W | PCL9   | 1.00 | 1.04  | 1.35  | 1.25 |
| YPR199C | ARR1   | 1.00 | 1.03  | 1.26  | 1.25 |
| YDL073W |        | 1.00 | 1.00  | 1.11  | 1.25 |
| YKL062W | MSN4   | 1.00 | -1.01 | 1.18  | 1.25 |
| YPR063C |        | 1.00 | -1.01 | 1.38  | 1.25 |
| YDR326C |        | 1.00 | -1.02 | 1.10  | 1.25 |
| YLR063W |        | 1.00 | -1.02 | 1.08  | 1.25 |
| YGR249W | MGA1   | 1.00 | -1.03 | 1.19  | 1.25 |
| YPL202C | AFT2   | 1.00 | -1.04 | 1.25  | 1.25 |
| YPL274W | SAM3   | 1.00 | -1.05 | 1.11  | 1.25 |
| YJR026W |        | 1.00 | -1.06 | 1.20  | 1.25 |
| YKR036C | CAF4   | 1.00 | -1.07 | -1.11 | 1.25 |
| YFL037W | TUB2   | 1.00 | -1.08 | 1.29  | 1.25 |



|         |        |      |       |       |      |
|---------|--------|------|-------|-------|------|
| YOR027W | STI1   | 1.00 | -1.13 | 1.52  | 1.25 |
| YOR014W | RTS1   | 1.00 | -1.20 | 1.14  | 1.25 |
| YDL150W | RPC53  | 1.00 | -1.25 | 1.14  | 1.25 |
| YHR023W | MYO1   | 1.00 | -1.25 | 1.03  | 1.25 |
| YBR177C | EHT1   | 1.00 | -1.26 | 1.01  | 1.25 |
| YLR285W |        | 1.00 | -1.30 | 1.10  | 1.25 |
| YER126C | KRE32  | 1.00 | -1.31 | -1.05 | 1.25 |
| YKL209C | STE6   | 1.00 | -1.32 | 1.07  | 1.25 |
| YOR051C |        | 1.00 | -1.41 | 1.14  | 1.25 |
| YBR253W | SRB6   | 1.00 | 1.32  | 1.26  | 1.24 |
| YKL144C | RPC25  | 1.00 | 1.32  | 1.34  | 1.24 |
| YNL227C |        | 1.00 | 1.26  | 1.31  | 1.24 |
| YIL005W |        | 1.00 | 1.18  | 1.06  | 1.24 |
| YNL156C |        | 1.00 | 1.18  | 1.66  | 1.24 |
| YOL075C |        | 1.00 | 1.17  | 1.23  | 1.24 |
| YPL015C | HST2   | 1.00 | 1.17  | 1.55  | 1.24 |
| YBR169C | SSE2   | 1.00 | 1.15  | -1.01 | 1.24 |
| YOR179C |        | 1.00 | 1.14  | 1.29  | 1.24 |
| YLR221C | RSA3   | 1.00 | 1.11  | 1.23  | 1.24 |
| YPR108W | RPN7   | 1.00 | 1.09  | 1.47  | 1.24 |
| YIL037C | PRM2   | 1.00 | 1.07  | 1.04  | 1.24 |
| YKL004W | AUR1   | 1.00 | 1.06  | 1.04  | 1.24 |
| YDR315C | IPK1   | 1.00 | 1.04  | 1.24  | 1.24 |
| YHR035W |        | 1.00 | 1.03  | 1.06  | 1.24 |
| YCR077C | PAT1   | 1.00 | -1.01 | -1.07 | 1.24 |
| YGR135W | PRE9   | 1.00 | -1.02 | -1.06 | 1.24 |
| YER057C | HMF1   | 1.00 | -1.03 | -1.06 | 1.24 |
| YPR162C | ORC4   | 1.00 | -1.03 | 1.19  | 1.24 |
| YAL013W | DEP1   | 1.00 | -1.06 | 1.13  | 1.24 |
| YGL229C | SAP4   | 1.00 | -1.06 | 1.11  | 1.24 |
| YPR024W | YME1   | 1.00 | -1.07 | 1.49  | 1.24 |
| YBL104C |        | 1.00 | -1.10 | 1.05  | 1.24 |
| YDR014W |        | 1.00 | -1.10 | -1.02 | 1.24 |
| YOL025W | LAG2   | 1.00 | -1.11 | 1.06  | 1.24 |
| YEL004W | YEA4   | 1.00 | -1.16 | -1.19 | 1.24 |
| YGL240W | DOC1   | 1.00 | -1.17 | 1.08  | 1.24 |
| YGL218W |        | 1.00 | -1.20 | 1.09  | 1.24 |
| YCR051W |        | 1.00 | -1.35 | -1.02 | 1.24 |
| YBR298C | MAL31  | 1.00 | 1.50  | 1.25  | 1.23 |
| YGR106C |        | 1.00 | 1.50  | 1.42  | 1.23 |
| YKL061W |        | 1.00 | 1.34  | 1.23  | 1.23 |
| YDR505C | PSP1   | 1.00 | 1.23  | 1.33  | 1.23 |
| YHR083W |        | 1.00 | 1.22  | 1.15  | 1.23 |
| YKL052C | ASK1   | 1.00 | 1.20  | 1.08  | 1.23 |
| YCR035C | RRP43  | 1.00 | 1.18  | 1.07  | 1.23 |
| YBR250W |        | 1.00 | 1.17  | 1.22  | 1.23 |
| YOL001W | PHO80  | 1.00 | 1.12  | 1.37  | 1.23 |
| YIL015W | BAR1   | 1.00 | 1.08  | 1.28  | 1.23 |
| YOL104C | NDJ1   | 1.00 | 1.08  | 1.13  | 1.23 |
| YDL123W | SNA4   | 1.00 | 1.07  | -1.09 | 1.23 |
| YER028C |        | 1.00 | 1.07  | -1.06 | 1.23 |
| YPL237W | SUI3   | 1.00 | 1.07  | 1.11  | 1.23 |
| YKL131W |        | 1.00 | 1.06  | 1.17  | 1.23 |
| YMR124W |        | 1.00 | 1.05  | 1.33  | 1.23 |
| YER169W | RPH1   | 1.00 | 1.04  | 1.03  | 1.23 |
| YGR218W | CRM1   | 1.00 | 1.04  | 1.15  | 1.23 |
| YOR234C | RPL33B | 1.00 | 1.02  | 1.16  | 1.23 |
| YPL268W | PLC1   | 1.00 | 1.02  | 1.15  | 1.23 |
| YHR078W |        | 1.00 | 1.01  | 1.10  | 1.23 |
| YNL256W | FOL1   | 1.00 | 1.01  | 1.15  | 1.23 |
| YHR117W | TOM71  | 1.00 | 1.00  | 1.25  | 1.23 |

|         |        |      |       |       |      |
|---------|--------|------|-------|-------|------|
| YOL076W | MDM20  | 1.00 | -1.01 | 1.07  | 1.23 |
| YDL190C | UFD2   | 1.00 | -1.02 | 1.04  | 1.23 |
| YOL158C | ENB1   | 1.00 | -1.04 | 1.05  | 1.23 |
| YOR351C | MEK1   | 1.00 | -1.05 | 1.16  | 1.23 |
| YGL129C | RSM23  | 1.00 | -1.06 | -1.09 | 1.23 |
| YOR112W |        | 1.00 | -1.06 | 1.20  | 1.23 |
| YOR383C | FIT3   | 1.00 | -1.06 | 1.01  | 1.23 |
| YLR366W |        | 1.00 | -1.09 | 1.07  | 1.23 |
| YML064C | TEM1   | 1.00 | -1.09 | 1.73  | 1.23 |
| YPL188W | POS5   | 1.00 | -1.13 | -1.04 | 1.23 |
| YOR287C |        | 1.00 | -1.14 | 1.00  | 1.23 |
| YKR061W | KTR2   | 1.00 | -1.15 | 1.02  | 1.23 |
| YIL104C |        | 1.00 | -1.17 | 1.30  | 1.23 |
| YJL008C | CCT8   | 1.00 | -1.17 | 1.24  | 1.23 |
| YHL009C | YAP3   | 1.00 | -1.20 | -1.03 | 1.23 |
| YMR010W |        | 1.00 | -1.24 | -1.08 | 1.23 |
| YNL083W |        | 1.00 | -1.29 | 1.20  | 1.23 |
| YLR064W |        | 1.00 | -1.33 | 1.13  | 1.23 |
| YJL122W |        | 1.00 | -1.40 | 1.17  | 1.23 |
| YBR131W | CCZ1   | 1.00 | 1.31  | 1.38  | 1.22 |
| YBL049W |        | 1.00 | 1.30  | 1.54  | 1.22 |
| YDR006C | SOK1   | 1.00 | 1.26  | 1.32  | 1.22 |
| YJL196C | ELO1   | 1.00 | 1.25  | 1.24  | 1.22 |
| YHR073W | OSH3   | 1.00 | 1.24  | 1.26  | 1.22 |
| YOL143C | RIB4   | 1.00 | 1.20  | 1.40  | 1.22 |
| YBR178W |        | 1.00 | 1.19  | 1.36  | 1.22 |
| YBR242W |        | 1.00 | 1.18  | 1.20  | 1.22 |
| YLR374C |        | 1.00 | 1.18  | 1.05  | 1.22 |
| YJL037W |        | 1.00 | 1.17  | 1.22  | 1.22 |
| YFR006W |        | 1.00 | 1.16  | 1.56  | 1.22 |
| YLL043W | FPS1   | 1.00 | 1.15  | 1.28  | 1.22 |
| YGR268C |        | 1.00 | 1.14  | 1.25  | 1.22 |
| YPL260W |        | 1.00 | 1.14  | 1.55  | 1.22 |
| YKL214C |        | 1.00 | 1.13  | 1.00  | 1.22 |
| YJL121C | RPE1   | 1.00 | 1.11  | 1.20  | 1.22 |
| YFL068W |        | 1.00 | 1.10  | 1.52  | 1.22 |
| YBR240C | THI2   | 1.00 | 1.08  | 1.17  | 1.22 |
| YBR179C | FZO1   | 1.00 | 1.07  | -1.10 | 1.22 |
| YDR545W | YRF1-1 | 1.00 | 1.07  | 1.26  | 1.22 |
| YER122C | GLO3   | 1.00 | 1.07  | 1.05  | 1.22 |
| YNL313C |        | 1.00 | 1.07  | 1.21  | 1.22 |
| YLR225C |        | 1.00 | 1.06  | 1.11  | 1.22 |
| YOL063C |        | 1.00 | 1.05  | 1.19  | 1.22 |
| YHR063C | PAN5   | 1.00 | 1.04  | 1.22  | 1.22 |
| YKR028W | SAP190 | 1.00 | 1.04  | 1.12  | 1.22 |
| YKR092C | SRP40  | 1.00 | 1.04  | 1.30  | 1.22 |
| YLR034C | SMF3   | 1.00 | 1.03  | 1.04  | 1.22 |
| YMR241W | YHM2   | 1.00 | 1.02  | -1.04 | 1.22 |
| YDR526C |        | 1.00 | 1.01  | 1.09  | 1.22 |
| YAL053W |        | 1.00 | 1.00  | 1.00  | 1.22 |
| YJL063C | MRPL8  | 1.00 | 1.00  | 1.33  | 1.22 |
| YOR208W | PTP2   | 1.00 | 1.00  | -1.02 | 1.22 |
| YKL046C |        | 1.00 | -1.02 | 1.01  | 1.22 |
| YMR319C | FET4   | 1.00 | -1.04 | 1.15  | 1.22 |
| YPR119W | CLB2   | 1.00 | -1.05 | -1.10 | 1.22 |
| YNL013C |        | 1.00 | -1.14 | 1.14  | 1.22 |
| YDR161W | TCI1   | 1.00 | -1.16 | 1.18  | 1.22 |
| YMR043W | MCM1   | 1.00 | -1.24 | 1.12  | 1.22 |
| YDR519W | FKB2   | 1.00 | -1.30 | 1.06  | 1.22 |
| YGR090W |        | 1.00 | -1.33 | -1.22 | 1.22 |
| YDR463W | STP1   | 1.00 | -1.41 | -1.24 | 1.22 |

|         |       |      |       |       |      |
|---------|-------|------|-------|-------|------|
| YBL046W |       | 1.00 | -1.61 | -1.36 | 1.22 |
| YOR201C | PET56 | 1.00 | -1.66 | -1.11 | 1.22 |
| YLR243W |       | 1.00 | -1.75 | -1.11 | 1.22 |
| YER070W | RNR1  | 1.00 | -2.21 | -1.20 | 1.22 |
| YFR053C | HXK1  | 1.00 | 3.11  | 5.00  | 1.21 |
| YOR044W |       | 1.00 | 1.33  | -1.02 | 1.21 |
| YAL051W | OAF1  | 1.00 | 1.32  | 1.37  | 1.21 |
| YBL088C | TEL1  | 1.00 | 1.27  | 1.43  | 1.21 |
| YBL095W |       | 1.00 | 1.27  | 1.22  | 1.21 |
| YBR036C | CSG2  | 1.00 | 1.27  | 1.27  | 1.21 |
| YOR169C |       | 1.00 | 1.27  | 1.75  | 1.21 |
| YDL112W | TRM3  | 1.00 | 1.25  | 1.02  | 1.21 |
| YDL088C | ASM4  | 1.00 | 1.24  | 1.33  | 1.21 |
| YBR160W | CDC28 | 1.00 | 1.23  | 1.30  | 1.21 |
| YFR002W | NIC96 | 1.00 | 1.22  | 1.30  | 1.21 |
| YBR146W | MRPS9 | 1.00 | 1.20  | 1.39  | 1.21 |
| YGR151C |       | 1.00 | 1.20  | 1.29  | 1.21 |
| YCL051W | LRE1  | 1.00 | 1.18  | 1.09  | 1.21 |
| YGL256W | ADH4  | 1.00 | 1.14  | 1.18  | 1.21 |
| YML023C |       | 1.00 | 1.14  | 1.21  | 1.21 |
| YKR007W |       | 1.00 | 1.11  | 1.22  | 1.21 |
| YMR016C | SOK2  | 1.00 | 1.10  | 1.29  | 1.21 |
| YNL226W |       | 1.00 | 1.10  | 1.28  | 1.21 |
| YOR353C |       | 1.00 | 1.10  | 1.36  | 1.21 |
| YDR121W | DPB4  | 1.00 | 1.08  | 1.22  | 1.21 |
| YCR001W |       | 1.00 | 1.07  | 1.41  | 1.21 |
| YPL120W | VPS30 | 1.00 | 1.07  | 1.26  | 1.21 |
| YIL109C | SEC24 | 1.00 | 1.06  | 1.48  | 1.21 |
| YDR439W | LRS4  | 1.00 | 1.03  | 1.11  | 1.21 |
| YIL177C |       | 1.00 | 1.03  | 1.45  | 1.21 |
| YHL026C |       | 1.00 | 1.01  | 1.33  | 1.21 |
| YPR114W |       | 1.00 | -1.01 | 1.17  | 1.21 |
| YDR309C | GIC2  | 1.00 | -1.02 | 1.01  | 1.21 |
| YAL025C | MAK16 | 1.00 | -1.05 | 1.03  | 1.21 |
| YHL039W |       | 1.00 | -1.05 | 1.07  | 1.21 |
| YJL212C | OPT1  | 1.00 | -1.05 | 1.01  | 1.21 |
| YBR062C |       | 1.00 | -1.07 | 1.10  | 1.21 |
| YMR192W |       | 1.00 | -1.09 | 1.12  | 1.21 |
| YMR093W |       | 1.00 | -1.13 | -1.10 | 1.21 |
| YDR077W | SED1  | 1.00 | -1.16 | 1.19  | 1.21 |
| YPR112C | MRD1  | 1.00 | -1.24 | 1.04  | 1.21 |
| YHR009C |       | 1.00 | -1.29 | -1.40 | 1.21 |
| YHR030C | SLT2  | 1.00 | -1.29 | 1.02  | 1.21 |
| YDR321W | ASP1  | 1.00 | -1.37 | -1.08 | 1.21 |
| YHR005C | GPA1  | 1.00 | -1.37 | 1.08  | 1.21 |
| YOL117W |       | 1.00 | -1.42 | 1.23  | 1.21 |
| YOR200W |       | 1.00 | -2.00 | -1.16 | 1.21 |
| YBL047C | EDE1  | 1.00 | 1.37  | 1.27  | 1.20 |
| YKL150W | MCR1  | 1.00 | 1.25  | 1.29  | 1.20 |
| YLR351C | NIT3  | 1.00 | 1.22  | 1.16  | 1.20 |
| YHR040W |       | 1.00 | 1.20  | 1.21  | 1.20 |
| YCR014C | POL4  | 1.00 | 1.19  | 1.12  | 1.20 |
| YDR001C | NTH1  | 1.00 | 1.17  | 1.48  | 1.20 |
| YBL028C |       | 1.00 | 1.16  | 1.17  | 1.20 |
| YER004W |       | 1.00 | 1.15  | 1.21  | 1.20 |
| YMR127C | SAS2  | 1.00 | 1.15  | 1.13  | 1.20 |
| YDR005C | MAF1  | 1.00 | 1.14  | 1.19  | 1.20 |
| YER168C | CCA1  | 1.00 | 1.13  | 1.32  | 1.20 |
| YMR191W |       | 1.00 | 1.11  | 1.46  | 1.20 |
| YJR024C |       | 1.00 | 1.08  | 1.19  | 1.20 |
| YGL073W | HSF1  | 1.00 | 1.06  | 1.30  | 1.20 |

|         |        |      |       |       |      |
|---------|--------|------|-------|-------|------|
| YGL196W |        | 1.00 | 1.03  | -1.07 | 1.20 |
| YNL225C | CNM67  | 1.00 | 1.03  | 1.13  | 1.20 |
| YDL099W |        | 1.00 | 1.02  | -1.04 | 1.20 |
| YMR153W | NUP53  | 1.00 | 1.01  | 1.11  | 1.20 |
| YOR111W |        | 1.00 | 1.01  | 1.11  | 1.20 |
| YLR238W |        | 1.00 | 1.00  | 1.10  | 1.20 |
| YOR109W | INP53  | 1.00 | -1.01 | -1.01 | 1.20 |
| YPL089C | RLM1   | 1.00 | -1.01 | 1.20  | 1.20 |
| YDR258C | HSP78  | 1.00 | -1.02 | 1.17  | 1.20 |
| YNR013C | PHO91  | 1.00 | -1.02 | 1.07  | 1.20 |
| YGR126W |        | 1.00 | -1.03 | -1.08 | 1.20 |
| YGL114W |        | 1.00 | -1.05 | 1.09  | 1.20 |
| YDL054C |        | 1.00 | -1.06 | 1.14  | 1.20 |
| YGL044C | RNA15  | 1.00 | -1.06 | 1.14  | 1.20 |
| YOL118C |        | 1.00 | -1.06 | 1.16  | 1.20 |
| YMR213W | CEF1   | 1.00 | -1.08 | 1.07  | 1.20 |
| YNR044W | AGA1   | 1.00 | -1.09 | -1.06 | 1.20 |
| YMR238W | DFG5   | 1.00 | -1.11 | 1.03  | 1.20 |
| YPR007C | SPO69  | 1.00 | -1.11 | 1.33  | 1.20 |
| YJR065C | ARP3   | 1.00 | -1.17 | 1.03  | 1.20 |
| YLL008W | DRS1   | 1.00 | -1.20 | 1.07  | 1.20 |
| YPL161C | BEM4   | 1.00 | -1.23 | -1.07 | 1.20 |
| YLR052W | IES3   | 1.00 | -1.24 | -1.03 | 1.20 |
| YLR129W | DIP2   | 1.00 | -1.24 | -1.13 | 1.20 |
| YNL183C | NPR1   | 1.00 | -1.28 | 1.13  | 1.20 |
| YBR266C |        | 1.00 | -1.37 | 1.09  | 1.20 |
| YJR143C | PMT4   | 1.00 | -1.52 | -1.01 | 1.20 |
| YBL084C | CDC27  | 1.00 | 1.31  | 1.43  | 1.19 |
| YKR066C | CCP1   | 1.00 | 1.29  | 1.53  | 1.19 |
| YHL047C | TAF1   | 1.00 | 1.28  | 1.22  | 1.19 |
| YDR538W | PAD1   | 1.00 | 1.25  | 1.19  | 1.19 |
| YGR037C | ACB1   | 1.00 | 1.24  | 1.27  | 1.19 |
| YOR389W |        | 1.00 | 1.24  | 1.09  | 1.19 |
| YJL059W | YHC3   | 1.00 | 1.19  | 1.03  | 1.19 |
| YAL027W |        | 1.00 | 1.16  | 1.10  | 1.19 |
| YNL157W |        | 1.00 | 1.15  | 1.24  | 1.19 |
| YBR161W |        | 1.00 | 1.14  | 1.14  | 1.19 |
| YOR372C | NDD1   | 1.00 | 1.12  | 1.21  | 1.19 |
| YPR075C | OPY2   | 1.00 | 1.12  | 1.23  | 1.19 |
| YBR076W | ECM8   | 1.00 | 1.09  | 1.07  | 1.19 |
| YML051W | GAL80  | 1.00 | 1.09  | 1.13  | 1.19 |
| YOR307C | SLY41  | 1.00 | 1.03  | 1.09  | 1.19 |
| YLR170C | APS1   | 1.00 | 1.02  | 1.20  | 1.19 |
| YLR321C | SFH1   | 1.00 | 1.01  | -1.01 | 1.19 |
| YGL070C | RPB9   | 1.00 | 1.00  | 1.07  | 1.19 |
| YMR148W |        | 1.00 | -1.01 | 1.26  | 1.19 |
| YOR297C | TIM18  | 1.00 | -1.02 | 1.17  | 1.19 |
| YMR197C | VTI1   | 1.00 | -1.03 | 1.15  | 1.19 |
| YDR465C | RMT2   | 1.00 | -1.04 | 1.04  | 1.19 |
| YOL072W | THP1   | 1.00 | -1.04 | -1.05 | 1.19 |
| YDL239C | ADY3   | 1.00 | -1.05 | 1.00  | 1.19 |
| YJL165C | HAL5   | 1.00 | -1.06 | 1.26  | 1.19 |
| YHR206W | SKN7   | 1.00 | -1.07 | -1.14 | 1.19 |
| YER158C |        | 1.00 | -1.09 | 1.20  | 1.19 |
| YNL188W | KAR1   | 1.00 | -1.15 | 1.03  | 1.19 |
| YNL339C | YRF1-6 | 1.00 | -1.15 | 1.32  | 1.19 |
| YLR458W |        | 1.00 | -1.24 | 2.36  | 1.19 |
| YIL061C | SNP1   | 1.00 | -1.25 | 1.04  | 1.19 |
| YPL282C |        | 1.00 | -1.26 | -1.16 | 1.19 |
| YHL049C |        | 1.00 | -1.37 | 1.31  | 1.19 |
| YGR265W |        | 1.00 | -1.39 | -1.08 | 1.19 |

|         |        |      |       |       |      |
|---------|--------|------|-------|-------|------|
| YJL159W | HSP150 | 1.00 | -1.46 | -1.04 | 1.19 |
| YPR072W | NOT5   | 1.00 | -1.62 | 1.42  | 1.19 |
| YHR049W |        | 1.00 | -1.88 | -1.12 | 1.19 |
| YCR024C |        | 1.00 | 1.15  | 1.01  | 1.19 |
| YMR015C | ERG5   | 1.00 | 1.46  | 1.77  | 1.18 |
| YDR063W |        | 1.00 | 1.37  | 1.24  | 1.18 |
| YBL003C | HTA2   | 1.00 | 1.29  | 1.14  | 1.18 |
| YCR061W |        | 1.00 | 1.24  | 1.25  | 1.18 |
| YDR174W | HMO1   | 1.00 | 1.24  | 1.53  | 1.18 |
| YDR067C |        | 1.00 | 1.20  | 1.33  | 1.18 |
| YBR065C | ECM2   | 1.00 | 1.14  | 1.28  | 1.18 |
| YLR369W | SSQ1   | 1.00 | 1.13  | 1.04  | 1.18 |
| YOL013C | HRD1   | 1.00 | 1.13  | 1.34  | 1.18 |
| YER068W | MOT2   | 1.00 | 1.12  | 1.17  | 1.18 |
| YIL139C | REV7   | 1.00 | 1.12  | 1.08  | 1.18 |
| YBR202W | CDC47  | 1.00 | 1.08  | 1.10  | 1.18 |
| YLR297W |        | 1.00 | 1.07  | 1.02  | 1.18 |
| YAR008W | SEN34  | 1.00 | 1.06  | 1.20  | 1.18 |
| YPL182C |        | 1.00 | 1.06  | 1.28  | 1.18 |
| YPL129W | ANC1   | 1.00 | 1.05  | 1.29  | 1.18 |
| YHR144C | DCD1   | 1.00 | 1.04  | 1.86  | 1.18 |
| YLR246W | ERF2   | 1.00 | 1.01  | 1.14  | 1.18 |
| YPL101W | TOT7   | 1.00 | 1.00  | 1.22  | 1.18 |
| YDR184C | ATC1   | 1.00 | -1.01 | -1.09 | 1.18 |
| YBL105C | PKC1   | 1.00 | -1.02 | 1.17  | 1.18 |
| YOR101W | RAS1   | 1.00 | -1.05 | 1.08  | 1.18 |
| YPR051W | MAK3   | 1.00 | -1.05 | -1.08 | 1.18 |
| YPL066W |        | 1.00 | -1.06 | 1.24  | 1.18 |
| YDR527W |        | 1.00 | -1.07 | -1.06 | 1.18 |
| YER164W | CHD1   | 1.00 | -1.08 | 1.27  | 1.18 |
| YHR197W |        | 1.00 | -1.09 | 1.09  | 1.18 |
| YDL216C | RRI1   | 1.00 | -1.10 | -1.08 | 1.18 |
| YNL181W |        | 1.00 | -1.10 | 1.20  | 1.18 |
| YLR136C | TIS11  | 1.00 | -1.11 | 1.00  | 1.18 |
| YDL007W | RPT2   | 1.00 | -1.12 | 1.51  | 1.18 |
| YNL282W | POP3   | 1.00 | -1.12 | 1.05  | 1.18 |
| YOR131C |        | 1.00 | -1.12 | 1.22  | 1.18 |
| YGR125W |        | 1.00 | -1.15 | 1.07  | 1.18 |
| YKL114C | APN1   | 1.00 | -1.15 | -1.04 | 1.18 |
| YJL051W |        | 1.00 | -1.18 | 1.03  | 1.18 |
| YKL077W |        | 1.00 | -1.23 | 1.10  | 1.18 |
| YLL048C | YBT1   | 1.00 | -1.23 | -1.13 | 1.18 |
| YOR316C | COT1   | 1.00 | -1.23 | -1.11 | 1.18 |
| YNL169C | PSD1   | 1.00 | -1.24 | 1.00  | 1.18 |
| YCL031C | RRP7   | 1.00 | -1.26 | -1.01 | 1.18 |
| YER132C | PMD1   | 1.00 | -1.27 | 1.03  | 1.18 |
| YLR465C |        | 1.00 | -1.31 | 1.45  | 1.18 |
| YPL214C | THI6   | 1.00 | -1.35 | -1.01 | 1.18 |
| YNR031C | SSK2   | 1.00 | -1.37 | -1.14 | 1.18 |
| YNL177C |        | 1.00 | -1.45 | 1.02  | 1.18 |
| YCL043C | PDI1   | 1.00 | -1.76 | -1.07 | 1.18 |
| YJL146W | IDS2   | 1.00 | -1.76 | 1.28  | 1.18 |
| YBR119W | MUD1   | 1.00 | 1.34  | 1.19  | 1.17 |
| YDR333C |        | 1.00 | 1.30  | 1.17  | 1.17 |
| YDL205C | HEM3   | 1.00 | 1.27  | 1.06  | 1.17 |
| YER175C | TMT1   | 1.00 | 1.27  | 1.46  | 1.17 |
| YBL050W | SEC17  | 1.00 | 1.23  | 1.25  | 1.17 |
| YBR215W | HPC2   | 1.00 | 1.23  | 1.11  | 1.17 |
| YDL108W | KIN28  | 1.00 | 1.23  | 1.28  | 1.17 |
| YDR099W | BMH2   | 1.00 | 1.21  | 1.41  | 1.17 |
| YBR043C |        | 1.00 | 1.18  | 1.17  | 1.17 |



|         |        |      |       |       |      |
|---------|--------|------|-------|-------|------|
| YDR226W | ADK1   | 1.00 | 1.18  | 1.35  | 1.17 |
| YFL052W |        | 1.00 | 1.18  | 1.32  | 1.17 |
| YGL017W | ATE1   | 1.00 | 1.17  | 1.09  | 1.17 |
| YKL175W | ZRT3   | 1.00 | 1.15  | 1.20  | 1.17 |
| YBR038W | CHS2   | 1.00 | 1.14  | 1.09  | 1.17 |
| YJR031C | GEA1   | 1.00 | 1.13  | 1.19  | 1.17 |
| YKR089C |        | 1.00 | 1.13  | 1.20  | 1.17 |
| YCR044C | PER1   | 1.00 | 1.12  | 1.04  | 1.17 |
| YDR126W | PSL10  | 1.00 | 1.12  | 1.12  | 1.17 |
| YGL244W | RTF1   | 1.00 | 1.12  | 1.14  | 1.17 |
| YOR078W | BUD21  | 1.00 | 1.12  | 1.14  | 1.17 |
| YCL027W | FUS1   | 1.00 | 1.09  | 1.07  | 1.17 |
| YBL023C | MCM2   | 1.00 | 1.08  | -1.05 | 1.17 |
| YNL103W | MET4   | 1.00 | 1.07  | 1.09  | 1.17 |
| YGR083C | GCD2   | 1.00 | 1.05  | 1.15  | 1.17 |
| YKR098C | UBP11  | 1.00 | 1.05  | 1.11  | 1.17 |
| YBR231C | AOR1   | 1.00 | 1.04  | 1.06  | 1.17 |
| YHR146W | CRP1   | 1.00 | 1.04  | 1.18  | 1.17 |
| YBR015C | MNN2   | 1.00 | 1.03  | -1.22 | 1.17 |
| YBR140C | IRA1   | 1.00 | 1.01  | 1.04  | 1.17 |
| YKL188C | PXA2   | 1.00 | 1.00  | 1.01  | 1.17 |
| YOR110W | TFC7   | 1.00 | 1.00  | 1.17  | 1.17 |
| YDR373W | FRQ1   | 1.00 | -1.01 | 1.33  | 1.17 |
| YJL108C | PRM10  | 1.00 | -1.03 | 1.13  | 1.17 |
| YNL322C | KRE1   | 1.00 | -1.03 | 1.39  | 1.17 |
| YDL047W | SIT4   | 1.00 | -1.04 | 1.08  | 1.17 |
| YNL014W | HEF3   | 1.00 | -1.04 | 1.89  | 1.17 |
| YPL251W |        | 1.00 | -1.04 | 1.04  | 1.17 |
| YIL036W | CST6   | 1.00 | -1.07 | 1.14  | 1.17 |
| YER031C | YPT31  | 1.00 | -1.10 | 1.14  | 1.17 |
| YKL167C | MRP49  | 1.00 | -1.10 | -1.09 | 1.17 |
| YMR147W |        | 1.00 | -1.11 | 1.17  | 1.17 |
| YBR148W | YSW1   | 1.00 | -1.12 | 1.09  | 1.17 |
| YBR162C | TOS1   | 1.00 | -1.15 | -1.39 | 1.17 |
| YMR219W | ESC1   | 1.00 | -1.15 | 1.24  | 1.17 |
| YHR037W | PUT2   | 1.00 | -1.21 | -1.17 | 1.17 |
| YDR269C |        | 1.00 | -1.25 | -1.20 | 1.17 |
| YIR018W | YAP5   | 1.00 | -1.26 | -1.02 | 1.17 |
| YOR074C | CDC21  | 1.00 | -1.26 | 1.63  | 1.17 |
| YIL151C |        | 1.00 | -1.36 | 1.08  | 1.17 |
| YJR146W |        | 1.00 | -1.36 | -1.04 | 1.17 |
| YPL278C |        | 1.00 | -1.43 | -1.25 | 1.17 |
| YOR191W | RIS1   | 1.00 | -1.49 | 1.01  | 1.17 |
| YNR029C |        | 1.00 | -1.66 | 1.07  | 1.17 |
| YLR039C | RIC1   | 1.00 | -1.67 | -1.10 | 1.17 |
| YNL129W |        | 1.00 | -1.72 | -1.20 | 1.17 |
| YOR295W | UAF30  | 1.00 | -1.80 | -1.03 | 1.17 |
| YER190W | YRF1-2 | 1.00 | 1.39  | 1.21  | 1.16 |
| YBR206W |        | 1.00 | 1.37  | 1.23  | 1.16 |
| YBR041W | FAT1   | 1.00 | 1.30  | 1.18  | 1.16 |
| YLL064C |        | 1.00 | 1.29  | 1.13  | 1.16 |
| YDR479C |        | 1.00 | 1.24  | 1.30  | 1.16 |
| YJL064W |        | 1.00 | 1.19  | 1.12  | 1.16 |
| YKL110C | KTI12  | 1.00 | 1.18  | 1.02  | 1.16 |
| YKR014C | YPT52  | 1.00 | 1.14  | 1.36  | 1.16 |
| YLR208W | SEC13  | 1.00 | 1.14  | 1.14  | 1.16 |
| YDR255C |        | 1.00 | 1.12  | 1.19  | 1.16 |
| YLR171W |        | 1.00 | 1.12  | 1.06  | 1.16 |
| YDL087C | LUC7   | 1.00 | 1.10  | 1.10  | 1.16 |
| YDL217C | TIM22  | 1.00 | 1.10  | 1.05  | 1.16 |
| YPL228W | CET1   | 1.00 | 1.10  | 1.11  | 1.16 |

|         |        |      |       |       |      |
|---------|--------|------|-------|-------|------|
| YGL206C | CHC1   | 1.00 | 1.09  | 1.14  | 1.16 |
| YMR023C | MSS1   | 1.00 | 1.09  | 1.50  | 1.16 |
| YBR171W | SEC66  | 1.00 | 1.07  | 1.06  | 1.16 |
| YHR041C | SRB2   | 1.00 | 1.06  | 1.06  | 1.16 |
| YER077C |        | 1.00 | 1.05  | 1.16  | 1.16 |
| YFL067W |        | 1.00 | 1.04  | 1.66  | 1.16 |
| YGR157W | CHO2   | 1.00 | 1.04  | 1.10  | 1.16 |
| YGL134W | PCL10  | 1.00 | 1.02  | 1.06  | 1.16 |
| YPR175W | DPB2   | 1.00 | 1.02  | 1.18  | 1.16 |
| YMR091C | NPL6   | 1.00 | 1.01  | 1.22  | 1.16 |
| YDR017C | KCS1   | 1.00 | 1.00  | 1.04  | 1.16 |
| YKL176C | LST4   | 1.00 | -1.01 | 1.04  | 1.16 |
| YJR130C | STR2   | 1.00 | -1.03 | -1.04 | 1.16 |
| YHR133C |        | 1.00 | -1.04 | 1.12  | 1.16 |
| YMR314W | PRE5   | 1.00 | -1.04 | 1.18  | 1.16 |
| YBR226C |        | 1.00 | -1.05 | 1.07  | 1.16 |
| YLR274W | CDC46  | 1.00 | -1.06 | 1.12  | 1.16 |
| YDR290W |        | 1.00 | -1.08 | 1.14  | 1.16 |
| YGL216W | KIP3   | 1.00 | -1.10 | -1.07 | 1.16 |
| YML001W | YPT7   | 1.00 | -1.10 | 1.12  | 1.16 |
| YLL011W | SOF1   | 1.00 | -1.12 | -1.07 | 1.16 |
| YOR377W | ATF1   | 1.00 | -1.13 | 1.23  | 1.16 |
| YLR041W |        | 1.00 | -1.15 | 1.14  | 1.16 |
| YMR096W | SNZ1   | 1.00 | -1.15 | -1.14 | 1.16 |
| YNR054C |        | 1.00 | -1.17 | 1.01  | 1.16 |
| YGR055W | MUP1   | 1.00 | -1.18 | -1.10 | 1.16 |
| YDR448W | ADA2   | 1.00 | -1.19 | 1.10  | 1.16 |
| YLR138W | NHA1   | 1.00 | -1.20 | 1.03  | 1.16 |
| YBR248C | HIS7   | 1.00 | -1.21 | -1.17 | 1.16 |
| YMR129W | POM152 | 1.00 | -1.25 | 1.04  | 1.16 |
| YGL239C |        | 1.00 | -1.29 | -1.28 | 1.16 |
| YMR218C | TRS130 | 1.00 | -1.30 | -1.06 | 1.16 |
| YDR353W | TRR1   | 1.00 | -1.80 | 1.18  | 1.16 |
| YHR143W |        | 1.00 | -1.18 | 1.14  | 1.16 |
| YOR159C | SME1   | 1.00 | 1.25  | 1.06  | 1.15 |
| YOR097C |        | 1.00 | 1.21  | 1.26  | 1.15 |
| YBR275C | RIF1   | 1.00 | 1.20  | 1.02  | 1.15 |
| YOR103C | OST2   | 1.00 | 1.20  | 1.10  | 1.15 |
| YGL231C |        | 1.00 | 1.18  | 1.18  | 1.15 |
| YBR085W | AAC3   | 1.00 | 1.17  | 1.17  | 1.15 |
| YJR113C | RSM7   | 1.00 | 1.17  | 1.05  | 1.15 |
| YOL052C | SPE2   | 1.00 | 1.11  | 1.59  | 1.15 |
| YBR265W | TSC10  | 1.00 | 1.10  | -1.04 | 1.15 |
| YER017C | AFG3   | 1.00 | 1.10  | 1.17  | 1.15 |
| YER035W | EDC2   | 1.00 | 1.10  | 1.20  | 1.15 |
| YFL010C |        | 1.00 | 1.10  | 1.15  | 1.15 |
| YMR259C |        | 1.00 | 1.10  | 1.08  | 1.15 |
| YJL149W |        | 1.00 | 1.09  | 1.02  | 1.15 |
| YGL167C | PMR1   | 1.00 | 1.07  | -1.02 | 1.15 |
| YGL051W |        | 1.00 | 1.05  | 1.16  | 1.15 |
| YDR192C | NUP42  | 1.00 | 1.04  | 1.10  | 1.15 |
| YER009W | NTF2   | 1.00 | 1.04  | -1.11 | 1.15 |
| YFL047W | RGD2   | 1.00 | 1.04  | 1.25  | 1.15 |
| YBL020W | RFT1   | 1.00 | 1.03  | 1.00  | 1.15 |
| YBR144C |        | 1.00 | 1.03  | -1.01 | 1.15 |
| YOR322C |        | 1.00 | 1.03  | 1.08  | 1.15 |
| YKL104C | GFA1   | 1.00 | 1.02  | 1.19  | 1.15 |
| YLR343W |        | 1.00 | 1.02  | 1.18  | 1.15 |
| YOL005C | RPB11  | 1.00 | 1.01  | -1.05 | 1.15 |
| YGR114C |        | 1.00 | 1.00  | 1.05  | 1.15 |
| YNL191W |        | 1.00 | -1.02 | 1.02  | 1.15 |

|         |        |      |       |       |      |
|---------|--------|------|-------|-------|------|
| YPL030W |        | 1.00 | -1.02 | -1.17 | 1.15 |
| YER135C |        | 1.00 | -1.03 | 1.06  | 1.15 |
| YGR057C | LST7   | 1.00 | -1.03 | -1.02 | 1.15 |
| YDR142C | PEX7   | 1.00 | -1.04 | -1.09 | 1.15 |
| YKL025C | PAN3   | 1.00 | -1.06 | 1.04  | 1.15 |
| YIL035C | CKA1   | 1.00 | -1.08 | 1.00  | 1.15 |
| YBR075W |        | 1.00 | -1.10 | 1.05  | 1.15 |
| YNL071W | LAT1   | 1.00 | -1.11 | 1.15  | 1.15 |
| YKL145W | RPT1   | 1.00 | -1.12 | 1.17  | 1.15 |
| YMR032W | HOF1   | 1.00 | -1.13 | 1.08  | 1.15 |
| YOR223W |        | 1.00 | -1.13 | 1.37  | 1.15 |
| YGR246C | BRF1   | 1.00 | -1.18 | 1.19  | 1.15 |
| YOR376W |        | 1.00 | -1.18 | 1.01  | 1.15 |
| YNL073W | MSK1   | 1.00 | -1.19 | 1.04  | 1.15 |
| YPL067C |        | 1.00 | -1.19 | -1.04 | 1.15 |
| YOR371C | GPE1   | 1.00 | -1.24 | -1.19 | 1.15 |
| YOR166C |        | 1.00 | -1.25 | 1.23  | 1.15 |
| YML071C | DOR1   | 1.00 | -1.31 | 1.10  | 1.15 |
| YFR052W | RPN12  | 1.00 | -1.35 | 1.09  | 1.15 |
| YDL096C |        | 1.00 | -1.36 | 1.16  | 1.15 |
| YGL252C | RTG2   | 1.00 | -1.44 | 1.01  | 1.15 |
| YDR297W | SUR2   | 1.00 | -1.50 | -1.12 | 1.15 |
| YHR032W |        | 1.00 | -1.67 | -1.29 | 1.15 |
| YGL109W |        | 1.00 | -1.68 | -1.04 | 1.15 |
| YOR299W | BUD7   | 1.00 | -1.70 | -1.29 | 1.15 |
| YPR181C | SEC23  | 1.00 | -1.83 | -1.21 | 1.15 |
| YHR039C | MSC7   | 1.00 | 1.02  | 1.09  | 1.14 |
| YJR008W |        | 1.00 | 1.63  | 1.27  | 1.14 |
| YLR157C | ASP3-2 | 1.00 | 1.44  | 1.68  | 1.14 |
| YBL012C |        | 1.00 | 1.22  | 1.10  | 1.14 |
| YBL073W |        | 1.00 | 1.22  | 1.11  | 1.14 |
| YGL179C | TOS3   | 1.00 | 1.18  | 1.01  | 1.14 |
| YNL240C | NAR1   | 1.00 | 1.17  | 1.20  | 1.14 |
| YOR327C | SNC2   | 1.00 | 1.17  | 1.30  | 1.14 |
| YLR079W | SIC1   | 1.00 | 1.15  | 1.29  | 1.14 |
| YAR033W |        | 1.00 | 1.14  | 1.18  | 1.14 |
| YHR189W |        | 1.00 | 1.14  | 1.03  | 1.14 |
| YDR443C | SSN2   | 1.00 | 1.13  | 1.23  | 1.14 |
| YNR025C |        | 1.00 | 1.12  | 1.10  | 1.14 |
| YPL256C | CLN2   | 1.00 | 1.12  | 1.07  | 1.14 |
| YAL048C |        | 1.00 | 1.10  | -1.01 | 1.14 |
| YDR039C | ENA2   | 1.00 | 1.07  | 1.02  | 1.14 |
| YGL112C | TAF60  | 1.00 | 1.07  | 1.18  | 1.14 |
| YDR434W | GPI17  | 1.00 | 1.06  | 1.22  | 1.14 |
| YGL100W | SEH1   | 1.00 | 1.06  | -1.11 | 1.14 |
| YNL219C | ALG9   | 1.00 | 1.06  | 1.18  | 1.14 |
| YPL108W |        | 1.00 | 1.06  | 1.04  | 1.14 |
| YNR004W |        | 1.00 | 1.03  | 1.19  | 1.14 |
| YGL205W | POX1   | 1.00 | 1.01  | 1.12  | 1.14 |
| YLR128W |        | 1.00 | 1.01  | 1.06  | 1.14 |
| YNL027W | CRZ1   | 1.00 | 1.01  | 1.08  | 1.14 |
| YDL166C |        | 1.00 | -1.03 | 1.00  | 1.14 |
| YPR090W |        | 1.00 | -1.03 | 1.19  | 1.14 |
| YDR257C | RMS1   | 1.00 | -1.04 | -1.18 | 1.14 |
| YOR181W | LAS17  | 1.00 | -1.04 | 1.06  | 1.14 |
| YNL234W |        | 1.00 | -1.05 | 1.07  | 1.14 |
| YPR138C | MEP3   | 1.00 | -1.05 | 1.24  | 1.14 |
| YBR198C | TAF90  | 1.00 | -1.06 | 1.12  | 1.14 |
| YDR179C |        | 1.00 | -1.06 | 1.03  | 1.14 |
| YEL029C | BUD16  | 1.00 | -1.09 | -1.12 | 1.14 |
| YLR040C |        | 1.00 | -1.10 | 1.05  | 1.14 |

|         |        |      |       |       |      |
|---------|--------|------|-------|-------|------|
| YDR152W |        | 1.00 | -1.13 | 1.00  | 1.14 |
| YOL016C | CMK2   | 1.00 | -1.14 | 1.16  | 1.14 |
| YOR021C |        | 1.00 | -1.21 | -1.02 | 1.14 |
| YDR177W | UBC1   | 1.00 | -1.23 | 1.11  | 1.14 |
| YPR049C | CVT9   | 1.00 | -1.23 | 1.04  | 1.14 |
| YLR192C | HCR1   | 1.00 | -1.24 | -1.01 | 1.14 |
| YOR304W | ISW2   | 1.00 | -1.24 | -1.04 | 1.14 |
| YDR320C | SWA2   | 1.00 | -1.30 | 1.13  | 1.14 |
| YJL194W | CDC6   | 1.00 | -1.31 | -1.04 | 1.14 |
| YOR116C | RPO31  | 1.00 | -1.34 | -1.09 | 1.14 |
| YAL023C | PMT2   | 1.00 | -1.35 | -1.23 | 1.14 |
| YPL201C |        | 1.00 | -1.40 | -1.27 | 1.14 |
| YGR180C | RNR4   | 1.00 | -1.41 | 1.07  | 1.14 |
| YLR466W | YRF1-4 | 1.00 | -1.42 | 1.11  | 1.14 |
| YGL006W | PMC1   | 1.00 | -1.44 | -1.13 | 1.14 |
| YOR083W |        | 1.00 | -1.45 | -1.05 | 1.14 |
| YDR229W |        | 1.00 | -1.47 | -1.25 | 1.14 |
| YBL005W | PDR3   | 1.00 | -1.44 | -1.16 | 1.14 |
| YFL048C | EMP47  | 1.00 | 1.45  | 1.17  | 1.13 |
| YNL335W |        | 1.00 | 1.43  | 1.27  | 1.13 |
| YBL062W |        | 1.00 | 1.32  | 1.20  | 1.13 |
| YOR220W |        | 1.00 | 1.30  | 1.54  | 1.13 |
| YOL153C |        | 1.00 | 1.28  | 1.29  | 1.13 |
| YBR134W |        | 1.00 | 1.26  | 1.17  | 1.13 |
| YDL178W | AIP2   | 1.00 | 1.24  | 1.39  | 1.13 |
| YER027C | GAL83  | 1.00 | 1.23  | 1.14  | 1.13 |
| YDL125C | HNT1   | 1.00 | 1.19  | 1.30  | 1.13 |
| YIL175W |        | 1.00 | 1.19  | 1.01  | 1.13 |
| YIR022W | SEC11  | 1.00 | 1.16  | 1.24  | 1.13 |
| YOL079W |        | 1.00 | 1.16  | -1.02 | 1.13 |
| YEL016C |        | 1.00 | 1.15  | 1.03  | 1.13 |
| YBR254C | TRS20  | 1.00 | 1.14  | 1.09  | 1.13 |
| YPL218W | SAR1   | 1.00 | 1.13  | 1.26  | 1.13 |
| YDL184C | RPL41A | 1.00 | 1.12  | 1.09  | 1.13 |
| YLR137W |        | 1.00 | 1.12  | 1.16  | 1.13 |
| YBR227C | MCX1   | 1.00 | 1.10  | 1.26  | 1.13 |
| YDL193W |        | 1.00 | 1.10  | 1.02  | 1.13 |
| YDR336W |        | 1.00 | 1.10  | 1.30  | 1.13 |
| YOL089C | HAL9   | 1.00 | 1.09  | 1.07  | 1.13 |
| YPL211W | NIP7   | 1.00 | 1.09  | -1.14 | 1.13 |
| YCR037C | PHO87  | 1.00 | 1.08  | 1.01  | 1.13 |
| YDL072C |        | 1.00 | 1.07  | 1.08  | 1.13 |
| YBR300C |        | 1.00 | 1.06  | 1.14  | 1.13 |
| YOR035C | SHE4   | 1.00 | 1.05  | 1.18  | 1.13 |
| YOL088C | MPD2   | 1.00 | 1.04  | 1.25  | 1.13 |
| YIL083C |        | 1.00 | 1.03  | 1.05  | 1.13 |
| YDR164C | SEC1   | 1.00 | 1.02  | 1.26  | 1.13 |
| YLR353W | BUD8   | 1.00 | 1.02  | 1.05  | 1.13 |
| YDR108W | GSG1   | 1.00 | 1.01  | 1.07  | 1.13 |
| YDR362C | TFC6   | 1.00 | 1.01  | 1.12  | 1.13 |
| YNR038W | DBP6   | 1.00 | 1.01  | 1.04  | 1.13 |
| YPR029C | APL4   | 1.00 | 1.01  | 1.12  | 1.13 |
| YGL013C | PDR1   | 1.00 | 1.00  | 1.13  | 1.13 |
| YGR259C |        | 1.00 | 1.00  | -1.03 | 1.13 |
| YPR180W | AOS1   | 1.00 | -1.02 | 1.18  | 1.13 |
| YPL002C | SNF8   | 1.00 | -1.04 | 1.14  | 1.13 |
| YNR037C | RSM19  | 1.00 | -1.05 | 1.02  | 1.13 |
| YOL051W | GAL11  | 1.00 | -1.05 | 1.27  | 1.13 |
| YJL041W | NSP1   | 1.00 | -1.06 | 1.02  | 1.13 |
| YJR078W |        | 1.00 | -1.06 | -1.10 | 1.13 |
| YJR117W | STE24  | 1.00 | -1.06 | 1.08  | 1.13 |

|         |        |      |       |       |      |
|---------|--------|------|-------|-------|------|
| YFR029W | PTR3   | 1.00 | -1.07 | 1.04  | 1.13 |
| YOR156C | NFI1   | 1.00 | -1.11 | 1.01  | 1.13 |
| YPL046C | ELC1   | 1.00 | -1.11 | 1.76  | 1.13 |
| YGR267C | FOL2   | 1.00 | -1.12 | -1.04 | 1.13 |
| YNL086W |        | 1.00 | -1.13 | 1.16  | 1.13 |
| YPL207W |        | 1.00 | -1.19 | 1.15  | 1.13 |
| YKL015W | PUT3   | 1.00 | -1.22 | 1.03  | 1.13 |
| YPR173C | VPS4   | 1.00 | -1.22 | -1.08 | 1.13 |
| YLR055C | SPT8   | 1.00 | -1.25 | 1.05  | 1.13 |
| YNL104C | LEU4   | 1.00 | -1.35 | -1.18 | 1.13 |
| YGL169W | SUA5   | 1.00 | -1.37 | 1.00  | 1.13 |
| YGL132W |        | 1.00 | -1.39 | -1.17 | 1.13 |
| YBL048W |        | 1.00 | 1.60  | 1.20  | 1.12 |
| YNL030W | HHF2   | 1.00 | 1.49  | 1.53  | 1.12 |
| YER044C | ERG28  | 1.00 | 1.40  | 1.39  | 1.12 |
| YBL074C | AAR2   | 1.00 | 1.36  | 1.54  | 1.12 |
| YFL011W | HXT10  | 1.00 | 1.31  | 1.17  | 1.12 |
| YPL023C | MET12  | 1.00 | 1.30  | 1.20  | 1.12 |
| YDR160W | SSY1   | 1.00 | 1.23  | 1.14  | 1.12 |
| YBR098W | MMS4   | 1.00 | 1.21  | 1.33  | 1.12 |
| YIL057C |        | 1.00 | 1.21  | 1.45  | 1.12 |
| YJR019C | TES1   | 1.00 | 1.20  | 1.03  | 1.12 |
| YNL270C | ALP1   | 1.00 | 1.20  | 1.13  | 1.12 |
| YPL234C | TFP3   | 1.00 | 1.19  | 1.21  | 1.12 |
| YOL035C |        | 1.00 | 1.18  | 1.17  | 1.12 |
| YOR026W | BUB3   | 1.00 | 1.17  | 1.25  | 1.12 |
| YGL125W | MET13  | 1.00 | 1.16  | 1.32  | 1.12 |
| YGL185C |        | 1.00 | 1.16  | 1.20  | 1.12 |
| YMR132C |        | 1.00 | 1.13  | 1.10  | 1.12 |
| YNL206C | RTT106 | 1.00 | 1.13  | 1.07  | 1.12 |
| YBL077W |        | 1.00 | 1.12  | 1.09  | 1.12 |
| YBR087W | RFC5   | 1.00 | 1.12  | 1.10  | 1.12 |
| YPR103W | PRE2   | 1.00 | 1.11  | 1.02  | 1.12 |
| YDL098C | SNU23  | 1.00 | 1.10  | 1.07  | 1.12 |
| YLR184W |        | 1.00 | 1.09  | -1.09 | 1.12 |
| YOR352W |        | 1.00 | 1.07  | 1.19  | 1.12 |
| YDL127W | PCL2   | 1.00 | 1.05  | 1.09  | 1.12 |
| YJR102C | VPS25  | 1.00 | 1.05  | 1.29  | 1.12 |
| YDL120W | YFH1   | 1.00 | 1.04  | 1.13  | 1.12 |
| YER075C | PTP3   | 1.00 | 1.04  | 1.02  | 1.12 |
| YOL060C | AMI3   | 1.00 | 1.03  | 1.07  | 1.12 |
| YCR091W | KIN82  | 1.00 | 1.00  | 1.01  | 1.12 |
| YLR317W | KRE34  | 1.00 | 1.00  | 1.01  | 1.12 |
| YGL233W | SEC15  | 1.00 | -1.01 | -1.04 | 1.12 |
| YHR006W | STP2   | 1.00 | -1.02 | -1.04 | 1.12 |
| YDR367W |        | 1.00 | -1.03 | -1.04 | 1.12 |
| YDR047W | HEM12  | 1.00 | -1.04 | 1.06  | 1.12 |
| YGL050W |        | 1.00 | -1.04 | -1.02 | 1.12 |
| YDL126C | CDC48  | 1.00 | -1.05 | 1.41  | 1.12 |
| YHR188C | GPI16  | 1.00 | -1.06 | 1.09  | 1.12 |
| YPL254W | HFI1   | 1.00 | -1.06 | -1.13 | 1.12 |
| YML117W |        | 1.00 | -1.07 | 1.44  | 1.12 |
| YKL147C |        | 1.00 | -1.10 | 1.13  | 1.12 |
| YLL056C |        | 1.00 | -1.10 | -1.03 | 1.12 |
| YOR365C |        | 1.00 | -1.12 | 1.09  | 1.12 |
| YDL103C | QRI1   | 1.00 | -1.13 | 1.02  | 1.12 |
| YER072W | VTC1   | 1.00 | -1.13 | -1.11 | 1.12 |
| YJL048C |        | 1.00 | -1.15 | 1.12  | 1.12 |
| YLR331C |        | 1.00 | -1.15 | 1.06  | 1.12 |
| YPR203W |        | 1.00 | -1.17 | 1.33  | 1.12 |
| YLR101C |        | 1.00 | -1.18 | 1.21  | 1.12 |



|         |         |      |       |       |      |
|---------|---------|------|-------|-------|------|
| YNL280C | ERG24   | 1.00 | -1.18 | 1.08  | 1.12 |
| YPR144C |         | 1.00 | -1.18 | 1.12  | 1.12 |
| YNL078W | JIP1    | 1.00 | -1.23 | 1.16  | 1.12 |
| YOR046C | DBP5    | 1.00 | -1.24 | -1.03 | 1.12 |
| YPR177C |         | 1.00 | -1.25 | 1.10  | 1.12 |
| YGL227W | VID30   | 1.00 | -1.26 | -1.06 | 1.12 |
| YOR227W |         | 1.00 | -1.29 | 1.15  | 1.12 |
| YDR266C |         | 1.00 | -1.30 | -1.08 | 1.12 |
| YOR173W |         | 1.00 | -1.32 | -1.32 | 1.12 |
| YOR202W | HIS3    | 1.00 | -1.32 | -1.20 | 1.12 |
| YPL071C |         | 1.00 | -1.41 | -1.07 | 1.12 |
| YOR387C |         | 1.00 | -1.42 | -1.05 | 1.12 |
| YGR162W | TIF4631 | 1.00 | -1.43 | 1.05  | 1.12 |
| YPR059C |         | 1.00 | -1.59 | 1.01  | 1.12 |
| YDR172W | SUP35   | 1.00 | -1.77 | -1.08 | 1.12 |
| YGR078C | PAC10   | 1.00 | -1.86 | -1.10 | 1.12 |
| YPL036W | PMA2    | 1.00 | -1.87 | -1.48 | 1.12 |
| YGR025W |         | 1.00 | -2.05 | -1.07 | 1.12 |
| YJR124C |         | 1.00 | -2.27 | -1.04 | 1.12 |
| YMR034C |         | 1.00 | 1.29  | 1.34  | 1.11 |
| YEL073C |         | 1.00 | 1.26  | 1.36  | 1.11 |
| YCL001W | RER1    | 1.00 | 1.23  | 1.20  | 1.11 |
| YGL087C | MMS2    | 1.00 | 1.23  | 1.35  | 1.11 |
| YIL042C |         | 1.00 | 1.23  | 1.04  | 1.11 |
| YGR063C | SPT4    | 1.00 | 1.15  | -1.05 | 1.11 |
| YOL050C |         | 1.00 | 1.14  | 1.32  | 1.11 |
| YKL064W | MNR2    | 1.00 | 1.13  | 1.21  | 1.11 |
| YBR089W |         | 1.00 | 1.12  | 1.17  | 1.11 |
| YDR444W |         | 1.00 | 1.10  | -1.02 | 1.11 |
| YGR261C | APL6    | 1.00 | 1.10  | 1.00  | 1.11 |
| YCL017C | NFS1    | 1.00 | 1.09  | 1.18  | 1.11 |
| YDR081C | PDC2    | 1.00 | 1.06  | 1.08  | 1.11 |
| YBR255W |         | 1.00 | 1.05  | 1.03  | 1.11 |
| YCR101C |         | 1.00 | 1.04  | 1.17  | 1.11 |
| YLR440C |         | 1.00 | 1.04  | 1.09  | 1.11 |
| YML038C | YMD8    | 1.00 | 1.04  | 1.04  | 1.11 |
| YMR073C |         | 1.00 | 1.04  | 1.07  | 1.11 |
| YMR180C | CTL1    | 1.00 | 1.04  | 1.25  | 1.11 |
| YOL085C |         | 1.00 | 1.04  | -1.05 | 1.11 |
| YFL017C | GNA1    | 1.00 | 1.03  | 1.07  | 1.11 |
| YDR090C |         | 1.00 | 1.02  | -1.04 | 1.11 |
| YGR210C |         | 1.00 | 1.00  | 1.27  | 1.11 |
| YPR161C | SGV1    | 1.00 | -1.02 | 1.01  | 1.11 |
| YDR267C |         | 1.00 | -1.03 | 1.23  | 1.11 |
| YGR080W | TWF1    | 1.00 | -1.03 | -1.06 | 1.11 |
| YDR515W | SLF1    | 1.00 | -1.05 | -1.23 | 1.11 |
| YDR263C | DIN7    | 1.00 | -1.06 | 1.15  | 1.11 |
| YIL110W |         | 1.00 | -1.06 | 1.05  | 1.11 |
| YLR328W |         | 1.00 | -1.07 | 1.10  | 1.11 |
| YER045C | ACA1    | 1.00 | -1.09 | 1.06  | 1.11 |
| YJR043C | POL32   | 1.00 | -1.09 | 1.00  | 1.11 |
| YDR405W | MRP20   | 1.00 | -1.13 | -1.04 | 1.11 |
| YNR030W | ECM39   | 1.00 | -1.14 | 1.00  | 1.11 |
| YDR496C | PUF6    | 1.00 | -1.18 | -1.10 | 1.11 |
| YMR274C | RCE1    | 1.00 | -1.23 | 1.04  | 1.11 |
| YMR125W | STO1    | 1.00 | -1.39 | 1.02  | 1.11 |
| YCR052W | RSC6    | 1.00 | -1.40 | 1.00  | 1.11 |
| YDR065W |         | 1.00 | -1.40 | 1.16  | 1.11 |
| YML087C |         | 1.00 | -1.48 | -1.17 | 1.11 |
| YDR293C | SSD1    | 1.00 | -1.68 | -1.30 | 1.11 |
| YOR296W |         | 1.00 | -1.72 | 1.00  | 1.11 |

|         |        |      |       |       |      |
|---------|--------|------|-------|-------|------|
| YGL097W | SRM1   | 1.00 | -1.76 | -1.10 | 1.11 |
| YEL055C | POL5   | 1.00 | -1.77 | -1.11 | 1.11 |
| YJR076C | CDC11  | 1.00 | -2.03 | 1.11  | 1.11 |
| YOR155C |        | 1.00 | 1.39  | 1.56  | 1.10 |
| YFR010W | UBP6   | 1.00 | 1.30  | 1.43  | 1.10 |
| YGR257C |        | 1.00 | 1.23  | 1.07  | 1.10 |
| YDR457W | TOM1   | 1.00 | 1.22  | 1.11  | 1.10 |
| YJL047C | RTT101 | 1.00 | 1.21  | 1.19  | 1.10 |
| YGR255C | COQ6   | 1.00 | 1.19  | 1.09  | 1.10 |
| YDR466W |        | 1.00 | 1.18  | 1.15  | 1.10 |
| YMR183C | SSO2   | 1.00 | 1.14  | 1.28  | 1.10 |
| YCR069W | SCC3   | 1.00 | 1.13  | 1.25  | 1.10 |
| YKR099W | BAS1   | 1.00 | 1.12  | 1.21  | 1.10 |
| YNL063W |        | 1.00 | 1.12  | 1.12  | 1.10 |
| YNR049C | MSO1   | 1.00 | 1.12  | 1.07  | 1.10 |
| YBR097W | VPS15  | 1.00 | 1.11  | -1.04 | 1.10 |
| YNL207W |        | 1.00 | 1.11  | 1.13  | 1.10 |
| YBR040W | FIG1   | 1.00 | 1.07  | 1.07  | 1.10 |
| YDL156W |        | 1.00 | 1.07  | 1.15  | 1.10 |
| YGL223C | TFI1   | 1.00 | 1.06  | 1.09  | 1.10 |
| YAR031W | PRM9   | 1.00 | 1.05  | 1.14  | 1.10 |
| YMR092C | AIP1   | 1.00 | 1.04  | 1.51  | 1.10 |
| YNL273W | TOF1   | 1.00 | 1.04  | -1.03 | 1.10 |
| YOL135C | MED7   | 1.00 | 1.04  | 1.07  | 1.10 |
| YDL046W |        | 1.00 | 1.03  | 1.09  | 1.10 |
| YBL041W | PRE7   | 1.00 | 1.02  | 1.06  | 1.10 |
| YCR081W | SRB8   | 1.00 | 1.02  | 1.00  | 1.10 |
| YER005W | YND1   | 1.00 | 1.02  | 1.58  | 1.10 |
| YNL101W |        | 1.00 | 1.02  | 1.19  | 1.10 |
| YPL252C | YAH1   | 1.00 | 1.02  | -1.06 | 1.10 |
| YLR015W | BRE2   | 1.00 | 1.01  | -1.11 | 1.10 |
| YLR091W |        | 1.00 | 1.01  | 1.07  | 1.10 |
| YLR248W | RCK2   | 1.00 | 1.00  | 1.43  | 1.10 |
| YFR020W |        | 1.00 | -1.01 | 1.07  | 1.10 |
| YHL012W |        | 1.00 | -1.01 | -1.06 | 1.10 |
| YNR035C | ARC35  | 1.00 | -1.01 | 1.10  | 1.10 |
| YNL331C | AAD14  | 1.00 | -1.02 | 1.20  | 1.10 |
| YJL085W | EXO70  | 1.00 | -1.03 | 1.02  | 1.10 |
| YGL059W |        | 1.00 | -1.04 | -1.05 | 1.10 |
| YGR128C |        | 1.00 | -1.04 | -1.07 | 1.10 |
| YIL121W |        | 1.00 | -1.04 | 1.00  | 1.10 |
| YHR048W |        | 1.00 | -1.05 | 1.11  | 1.10 |
| YGR193C | PDX1   | 1.00 | -1.06 | 1.08  | 1.10 |
| YHL027W | RIM101 | 1.00 | -1.06 | 1.22  | 1.10 |
| YJR161C | COS5   | 1.00 | -1.06 | 1.25  | 1.10 |
| YML077W | BET5   | 1.00 | -1.06 | 1.01  | 1.10 |
| YMR315W |        | 1.00 | -1.07 | 1.17  | 1.10 |
| YEL005C | VAB2   | 1.00 | -1.08 | -1.04 | 1.10 |
| YNR039C | ZRG17  | 1.00 | -1.08 | -1.09 | 1.10 |
| YOR380W |        | 1.00 | -1.08 | 1.09  | 1.10 |
| YHR107C | CDC12  | 1.00 | -1.10 | 1.06  | 1.10 |
| YIL130W |        | 1.00 | -1.10 | 1.13  | 1.10 |
| YNL319W |        | 1.00 | -1.10 | 1.15  | 1.10 |
| YPR025C | CCL1   | 1.00 | -1.11 | 1.09  | 1.10 |
| YDL018C | ERP3   | 1.00 | -1.12 | 1.03  | 1.10 |
| YIL023C |        | 1.00 | -1.13 | -1.06 | 1.10 |
| YOL103W | ITR2   | 1.00 | -1.13 | 1.07  | 1.10 |
| YMR264W | CUE1   | 1.00 | -1.14 | 1.03  | 1.10 |
| YML121W | GTR1   | 1.00 | -1.15 | 1.11  | 1.10 |
| YPL157W |        | 1.00 | -1.15 | 1.10  | 1.10 |
| YDR504C |        | 1.00 | -1.16 | -1.06 | 1.10 |

|         |        |      |       |       |      |
|---------|--------|------|-------|-------|------|
| YDR451C | YHP1   | 1.00 | -1.17 | -1.21 | 1.10 |
| YOR211C | MGM1   | 1.00 | -1.17 | 1.07  | 1.10 |
| YOR099W | KTR1   | 1.00 | -1.18 | -1.07 | 1.10 |
| YER020W | GPA2   | 1.00 | -1.20 | 1.14  | 1.10 |
| YOL045W |        | 1.00 | -1.20 | 1.05  | 1.10 |
| YHR062C | RPP1   | 1.00 | -1.22 | 1.15  | 1.10 |
| YCR030C |        | 1.00 | -1.23 | -1.03 | 1.10 |
| YOR017W | PET127 | 1.00 | -1.25 | 1.08  | 1.10 |
| YGR136W | LSB1   | 1.00 | -1.26 | -1.03 | 1.10 |
| YLR320W |        | 1.00 | -1.26 | 1.02  | 1.10 |
| YMR221C |        | 1.00 | -1.26 | 1.07  | 1.10 |
| YDR224C | HTB1   | 1.00 | -1.27 | 1.31  | 1.10 |
| YGL035C | MIG1   | 1.00 | -1.29 | 1.36  | 1.10 |
| YLR139C | SLS1   | 1.00 | -1.33 | -1.04 | 1.10 |
| YDL148C | NOP14  | 1.00 | -1.40 | -1.36 | 1.10 |
| YLR022C |        | 1.00 | -1.44 | -1.07 | 1.10 |
| YAR002W | NUP60  | 1.00 | -1.54 | -1.17 | 1.10 |
| YGL145W | TIP20  | 1.00 | -1.63 | -1.07 | 1.10 |
| YGR042W |        | 1.00 | -1.73 | -1.03 | 1.10 |
| YDR018C |        | 1.00 | 1.38  | 1.37  | 1.09 |
| YOL010W | RCL1   | 1.00 | 1.33  | 1.05  | 1.09 |
| YLR368W |        | 1.00 | 1.27  | 1.26  | 1.09 |
| YDL242W |        | 1.00 | 1.11  | 1.06  | 1.09 |
| YPL229W |        | 1.00 | 1.10  | 1.25  | 1.09 |
| YPR185W | APG13  | 1.00 | 1.10  | 1.19  | 1.09 |
| YAR003W | SWD1   | 1.00 | 1.09  | 1.11  | 1.09 |
| YML079W |        | 1.00 | 1.09  | -1.12 | 1.09 |
| YBR243C | ALG7   | 1.00 | 1.07  | 1.20  | 1.09 |
| YPL178W | CBC2   | 1.00 | 1.07  | 1.10  | 1.09 |
| YEL061C | CIN8   | 1.00 | 1.06  | 1.11  | 1.09 |
| YGL139W |        | 1.00 | 1.04  | -1.07 | 1.09 |
| YOR183W | FYV12  | 1.00 | 1.04  | 1.00  | 1.09 |
| YBR047W |        | 1.00 | 1.03  | 1.02  | 1.09 |
| YAL047C | SPC72  | 1.00 | 1.02  | 1.02  | 1.09 |
| YBL068W | PRS4   | 1.00 | 1.01  | 1.11  | 1.09 |
| YEL064C |        | 1.00 | 1.00  | -1.04 | 1.09 |
| YJL124C | LSM1   | 1.00 | -1.01 | 1.15  | 1.09 |
| YNL276C |        | 1.00 | -1.01 | 1.06  | 1.09 |
| YLR224W |        | 1.00 | -1.04 | -1.06 | 1.09 |
| YBR004C |        | 1.00 | -1.05 | -1.10 | 1.09 |
| YDL062W |        | 1.00 | -1.06 | -1.02 | 1.09 |
| YNL080C |        | 1.00 | -1.06 | 1.04  | 1.09 |
| YGL207W | SPT16  | 1.00 | -1.07 | 1.03  | 1.09 |
| YHR054C |        | 1.00 | -1.07 | 1.49  | 1.09 |
| YPR136C | FYV15  | 1.00 | -1.07 | -1.10 | 1.09 |
| YCR033W |        | 1.00 | -1.08 | -1.15 | 1.09 |
| YOL087C |        | 1.00 | -1.08 | 1.09  | 1.09 |
| YDR139C | RUB1   | 1.00 | -1.09 | -1.03 | 1.09 |
| YER003C | PMI40  | 1.00 | -1.09 | 1.28  | 1.09 |
| YDR264C | AKR1   | 1.00 | -1.11 | -1.02 | 1.09 |
| YDR221W |        | 1.00 | -1.12 | -1.03 | 1.09 |
| YLR218C |        | 1.00 | -1.12 | 1.05  | 1.09 |
| YNL095C |        | 1.00 | -1.14 | -1.04 | 1.09 |
| YCL016C | DCC1   | 1.00 | -1.15 | -1.29 | 1.09 |
| YHR149C |        | 1.00 | -1.15 | -1.05 | 1.09 |
| YOR008C | SLG1   | 1.00 | -1.15 | -1.12 | 1.09 |
| YDL240W | LRG1   | 1.00 | -1.16 | -1.12 | 1.09 |
| YHR077C | NMD2   | 1.00 | -1.23 | -1.24 | 1.09 |
| YHR127W | HSN1   | 1.00 | -1.23 | 1.02  | 1.09 |
| YNL048W | ALG11  | 1.00 | -1.23 | 1.08  | 1.09 |
| YMR289W |        | 1.00 | -1.29 | 1.24  | 1.09 |

|         |        |      |       |       |      |
|---------|--------|------|-------|-------|------|
| YCL054W | SPB1   | 1.00 | -1.45 | -1.24 | 1.09 |
| YOL165C | AAD15  | 1.00 | -1.49 | 1.04  | 1.09 |
| YAL035W | FUN12  | 1.00 | -1.59 | -1.37 | 1.09 |
| YJL110C | GZF3   | 1.00 | -2.09 | 1.26  | 1.09 |
| YBR276C | PPS1   | 1.00 | 1.47  | -1.05 | 1.08 |
| YDR468C | TLG1   | 1.00 | 1.34  | 1.22  | 1.08 |
| YBR108W |        | 1.00 | 1.28  | -1.01 | 1.08 |
| YNR034W | SOL1   | 1.00 | 1.28  | 1.38  | 1.08 |
| YBL025W | RRN10  | 1.00 | 1.22  | 1.15  | 1.08 |
| YBL032W |        | 1.00 | 1.21  | 1.21  | 1.08 |
| YBR012C |        | 1.00 | 1.18  | 1.22  | 1.08 |
| YDR201W | SPC19  | 1.00 | 1.17  | 1.13  | 1.08 |
| YCR100C |        | 1.00 | 1.16  | 1.00  | 1.08 |
| YMR027W | HRT2   | 1.00 | 1.14  | 1.35  | 1.08 |
| YGL015C |        | 1.00 | 1.13  | -1.03 | 1.08 |
| YLR155C | ASP3-1 | 1.00 | 1.12  | 1.51  | 1.08 |
| YLR275W | SMD2   | 1.00 | 1.12  | -1.01 | 1.08 |
| YCR099C |        | 1.00 | 1.10  | 1.21  | 1.08 |
| YGL027C | CWH41  | 1.00 | 1.08  | 1.21  | 1.08 |
| YHR074W | QNS1   | 1.00 | 1.08  | 1.47  | 1.08 |
| YMR001C | CDC5   | 1.00 | 1.08  | 1.15  | 1.08 |
| YCR008W | SAT4   | 1.00 | 1.04  | 1.21  | 1.08 |
| YLR299W | ECM38  | 1.00 | 1.04  | 1.10  | 1.08 |
| YDR313C | PIB1   | 1.00 | 1.03  | 1.07  | 1.08 |
| YHR187W | IKI1   | 1.00 | 1.03  | 1.10  | 1.08 |
| YIL079C |        | 1.00 | 1.03  | -1.06 | 1.08 |
| YLL034C |        | 1.00 | 1.03  | 1.15  | 1.08 |
| YLR462W |        | 1.00 | 1.03  | 1.54  | 1.08 |
| YOR241W | MET7   | 1.00 | 1.03  | -1.01 | 1.08 |
| YDR540C |        | 1.00 | 1.02  | -1.05 | 1.08 |
| YEL022W | GEA2   | 1.00 | 1.02  | 1.12  | 1.08 |
| YIR033W | MGA2   | 1.00 | 1.02  | 1.10  | 1.08 |
| YCL014W | BUD3   | 1.00 | 1.01  | -1.14 | 1.08 |
| YPL135W | ISU1   | 1.00 | 1.00  | 1.13  | 1.08 |
| YPR022C |        | 1.00 | 1.00  | -1.08 | 1.08 |
| YMR133W | REC114 | 1.00 | -1.01 | 1.05  | 1.08 |
| YDR038C | ENA5   | 1.00 | -1.04 | 1.07  | 1.08 |
| YJR069C | HAM1   | 1.00 | -1.04 | -1.13 | 1.08 |
| YNL326C |        | 1.00 | -1.04 | 1.11  | 1.08 |
| YOR123C | LEO1   | 1.00 | -1.04 | 1.21  | 1.08 |
| YHR101C | BIG1   | 1.00 | -1.05 | -1.05 | 1.08 |
| YOL115W | TRF4   | 1.00 | -1.06 | -1.09 | 1.08 |
| YDL075W | RPL31A | 1.00 | -1.07 | -1.26 | 1.08 |
| YKR030W |        | 1.00 | -1.07 | -1.06 | 1.08 |
| YNL168C |        | 1.00 | -1.08 | 1.08  | 1.08 |
| YMR171C |        | 1.00 | -1.10 | 1.03  | 1.08 |
| YOR069W | VPS5   | 1.00 | -1.10 | -1.03 | 1.08 |
| YDR261C | EXG2   | 1.00 | -1.11 | 1.03  | 1.08 |
| YCR019W | MAK32  | 1.00 | -1.13 | -1.15 | 1.08 |
| YGR048W | UFD1   | 1.00 | -1.15 | -1.02 | 1.08 |
| YHR065C | RRP3   | 1.00 | -1.17 | 1.17  | 1.08 |
| YOR212W | STE4   | 1.00 | -1.17 | 1.04  | 1.08 |
| YLR336C | SGD1   | 1.00 | -1.20 | 1.02  | 1.08 |
| YGR213C | RTA1   | 1.00 | -1.21 | -1.24 | 1.08 |
| YNR003C | RPC34  | 1.00 | -1.24 | -1.06 | 1.08 |
| YDR097C | MSH6   | 1.00 | -1.27 | -1.15 | 1.08 |
| YDR319C |        | 1.00 | -1.28 | -1.24 | 1.08 |
| YGR275W | RTT102 | 1.00 | -1.32 | -1.29 | 1.08 |
| YIL150C | DNA43  | 1.00 | -1.33 | 1.31  | 1.08 |
| YOR095C | RKI1   | 1.00 | -1.42 | -1.05 | 1.08 |
| YAL007C | ERP2   | 1.00 | -1.47 | -1.31 | 1.08 |

|         |           |      |       |       |      |
|---------|-----------|------|-------|-------|------|
| YBR143C | SUP45     | 1.00 | -1.50 | -1.14 | 1.08 |
| YOR199W |           | 1.00 | -1.70 | -1.21 | 1.08 |
| YGL054C | ERV14     | 1.00 | -1.80 | 1.20  | 1.08 |
| YDR173C | ARG82     | 1.00 | 1.46  | 1.13  | 1.07 |
| YLR242C | ARV1      | 1.00 | 1.36  | 1.34  | 1.07 |
| YCR063W | BUD31     | 1.00 | 1.33  | -1.11 | 1.07 |
| YER048C | CAJ1      | 1.00 | 1.33  | 1.21  | 1.07 |
| YPR053C |           | 1.00 | 1.24  | 1.38  | 1.07 |
| YKL036C |           | 1.00 | 1.22  | 1.30  | 1.07 |
| YCR083W | TRX3      | 1.00 | 1.18  | 1.11  | 1.07 |
| YPL034W |           | 1.00 | 1.18  | 1.03  | 1.07 |
| YCL066W | HMLALPHA1 | 1.00 | 1.14  | -1.02 | 1.07 |
| YPR081C |           | 1.00 | 1.11  | 1.11  | 1.07 |
| YNL214W | PEX17     | 1.00 | 1.10  | 1.09  | 1.07 |
| YGL164C |           | 1.00 | 1.08  | 1.31  | 1.07 |
| YHL024W | RIM4      | 1.00 | 1.08  | 1.07  | 1.07 |
| YLR453C | RIF2      | 1.00 | 1.08  | 1.08  | 1.07 |
| YIL176C |           | 1.00 | 1.07  | -1.01 | 1.07 |
| YDR311W | TFB1      | 1.00 | 1.06  | 1.00  | 1.07 |
| YKL164C | PIR1      | 1.00 | 1.05  | 1.24  | 1.07 |
| YDR497C | ITR1      | 1.00 | 1.04  | 1.13  | 1.07 |
| YKR046C |           | 1.00 | 1.04  | -1.03 | 1.07 |
| YDR338C |           | 1.00 | 1.02  | 1.00  | 1.07 |
| YHR113W |           | 1.00 | 1.02  | -1.08 | 1.07 |
| YKR051W |           | 1.00 | 1.01  | -1.01 | 1.07 |
| YMR270C | RRN9      | 1.00 | 1.01  | 1.11  | 1.07 |
| YDL080C | THI3      | 1.00 | -1.02 | -1.09 | 1.07 |
| YNL228W |           | 1.00 | -1.02 | 1.13  | 1.07 |
| YGL063W | PUS2      | 1.00 | -1.03 | 1.13  | 1.07 |
| YOR023C | AHC1      | 1.00 | -1.03 | 1.04  | 1.07 |
| YLR014C | PPR1      | 1.00 | -1.04 | -1.15 | 1.07 |
| YLR287C |           | 1.00 | -1.04 | 1.13  | 1.07 |
| YDR299W | BFR2      | 1.00 | -1.05 | -1.03 | 1.07 |
| YDR409W | SIZ1      | 1.00 | -1.05 | -1.05 | 1.07 |
| YFR043C |           | 1.00 | -1.05 | 1.05  | 1.07 |
| YOR354C | MSC6      | 1.00 | -1.05 | 1.16  | 1.07 |
| YNL003C | PET8      | 1.00 | -1.06 | 1.01  | 1.07 |
| YDR138W | HPR1      | 1.00 | -1.07 | -1.02 | 1.07 |
| YIL014W | MNT3      | 1.00 | -1.07 | 1.07  | 1.07 |
| YOR388C | FDH1      | 1.00 | -1.07 | -1.10 | 1.07 |
| YBR158W | CST13     | 1.00 | -1.08 | -1.04 | 1.07 |
| YGL018C | JAC1      | 1.00 | -1.08 | 1.15  | 1.07 |
| YMR223W | UBP8      | 1.00 | -1.08 | 1.00  | 1.07 |
| YFR030W | MET10     | 1.00 | -1.09 | 1.24  | 1.07 |
| YIL044C | AGE2      | 1.00 | -1.10 | 1.06  | 1.07 |
| YKL021C | MAK11     | 1.00 | -1.10 | 1.10  | 1.07 |
| YDL128W | VCX1      | 1.00 | -1.11 | 1.04  | 1.07 |
| YGR119C | NUP57     | 1.00 | -1.13 | -1.02 | 1.07 |
| YCL055W | KAR4      | 1.00 | -1.14 | -1.08 | 1.07 |
| YPR034W | ARP7      | 1.00 | -1.14 | 1.04  | 1.07 |
| YLR310C | CDC25     | 1.00 | -1.15 | 1.08  | 1.07 |
| YDR317W |           | 1.00 | -1.20 | 1.07  | 1.07 |
| YOR325W |           | 1.00 | -1.21 | -1.17 | 1.07 |
| YDR480W | DIG2      | 1.00 | -1.23 | 1.02  | 1.07 |
| YFR025C | HIS2      | 1.00 | -1.25 | 1.06  | 1.07 |
| YOR016C | ERP4      | 1.00 | -1.25 | -1.19 | 1.07 |
| YBL034C | STU1      | 1.00 | -1.27 | -1.19 | 1.07 |
| YBR175W | SWD3      | 1.00 | -1.32 | -1.17 | 1.07 |
| YER037W | PHM8      | 1.00 | -1.33 | -1.34 | 1.07 |
| YJL062W | LAS21     | 1.00 | -1.36 | 1.08  | 1.07 |
| YBR106W | PHO88     | 1.00 | -1.53 | -1.04 | 1.07 |



|         |        |      |       |       |      |
|---------|--------|------|-------|-------|------|
| YGL048C | RPT6   | 1.00 | -1.54 | -1.07 | 1.07 |
| YBL069W | AST1   | 1.00 | -1.62 | -1.25 | 1.07 |
| YJR101W | RSM26  | 1.00 | 1.50  | -1.01 | 1.06 |
| YHR090C | YNG2   | 1.00 | 1.45  | 1.04  | 1.06 |
| YIL004C | BET1   | 1.00 | 1.26  | 1.10  | 1.06 |
| YBR137W |        | 1.00 | 1.25  | 1.10  | 1.06 |
| YNR056C | BIO5   | 1.00 | 1.24  | 1.08  | 1.06 |
| YMR021C | MAC1   | 1.00 | 1.19  | 1.13  | 1.06 |
| YEL033W |        | 1.00 | 1.18  | 1.40  | 1.06 |
| YMR155W |        | 1.00 | 1.18  | 1.15  | 1.06 |
| YMR185W |        | 1.00 | 1.16  | 1.14  | 1.06 |
| YEL060C | PRB1   | 1.00 | 1.14  | 1.30  | 1.06 |
| YLR356W |        | 1.00 | 1.14  | 1.12  | 1.06 |
| YGR206W |        | 1.00 | 1.13  | 1.13  | 1.06 |
| YOL062C | APM4   | 1.00 | 1.13  | 1.06  | 1.06 |
| YBL103C | RTG3   | 1.00 | 1.11  | 1.02  | 1.06 |
| YHR114W | BZZ1   | 1.00 | 1.11  | 1.17  | 1.06 |
| YOL017W |        | 1.00 | 1.11  | 1.07  | 1.06 |
| YBL013W | FMT1   | 1.00 | 1.10  | 1.00  | 1.06 |
| YDL034W |        | 1.00 | 1.07  | 1.11  | 1.06 |
| YBR264C | YPT10  | 1.00 | 1.06  | -1.02 | 1.06 |
| YIL049W | DFG10  | 1.00 | 1.06  | 1.20  | 1.06 |
| YLR081W | GAL2   | 1.00 | 1.06  | 1.13  | 1.06 |
| YPR012W |        | 1.00 | 1.06  | 1.63  | 1.06 |
| YBR029C | CDS1   | 1.00 | 1.05  | 1.01  | 1.06 |
| YCR015C |        | 1.00 | 1.05  | 1.05  | 1.06 |
| YGR069W |        | 1.00 | 1.05  | -1.09 | 1.06 |
| YHR142W | CHS7   | 1.00 | 1.03  | 1.20  | 1.06 |
| YFL044C |        | 1.00 | 1.02  | 1.15  | 1.06 |
| YLR193C |        | 1.00 | 1.02  | 1.03  | 1.06 |
| YPL235W | RVB2   | 1.00 | 1.02  | 1.09  | 1.06 |
| YIL103W |        | 1.00 | 1.01  | 1.17  | 1.06 |
| YMR005W | MPT1   | 1.00 | 1.00  | 1.08  | 1.06 |
| YNL232W | CSL4   | 1.00 | 1.00  | 1.30  | 1.06 |
| YAL033W | POP5   | 1.00 | -1.01 | 1.07  | 1.06 |
| YGR146C |        | 1.00 | -1.01 | 1.06  | 1.06 |
| YNL320W |        | 1.00 | -1.02 | 1.01  | 1.06 |
| YPL227C | ALG5   | 1.00 | -1.02 | 1.13  | 1.06 |
| YLR231C |        | 1.00 | -1.03 | 1.14  | 1.06 |
| YBR204C |        | 1.00 | -1.04 | -1.10 | 1.06 |
| YDR314C |        | 1.00 | -1.04 | 1.02  | 1.06 |
| YJL049W |        | 1.00 | -1.05 | 1.03  | 1.06 |
| YPR006C | ICL2   | 1.00 | -1.05 | 1.12  | 1.06 |
| YCR067C | SED4   | 1.00 | -1.06 | 1.04  | 1.06 |
| YNL287W | SEC21  | 1.00 | -1.08 | 1.16  | 1.06 |
| YDR322W | MRPL35 | 1.00 | -1.09 | -1.09 | 1.06 |
| YNR027W | BUD17  | 1.00 | -1.09 | -1.05 | 1.06 |
| YNR028W | CPR8   | 1.00 | -1.09 | 1.07  | 1.06 |
| YAR014C | BUD14  | 1.00 | -1.10 | 1.16  | 1.06 |
| YGL038C | OCH1   | 1.00 | -1.11 | -1.35 | 1.06 |
| YLR003C |        | 1.00 | -1.11 | 1.02  | 1.06 |
| YNR021W |        | 1.00 | -1.11 | 1.14  | 1.06 |
| YKR071C | DRE2   | 1.00 | -1.12 | 1.13  | 1.06 |
| YLR253W |        | 1.00 | -1.12 | 1.03  | 1.06 |
| YBL101C | ECM21  | 1.00 | -1.14 | 1.13  | 1.06 |
| YNL213C |        | 1.00 | -1.14 | 1.06  | 1.06 |
| YBR166C | TYR1   | 1.00 | -1.15 | -1.11 | 1.06 |
| YER021W | RPN3   | 1.00 | -1.17 | 1.16  | 1.06 |
| YOR198C | BFR1   | 1.00 | -1.18 | 1.02  | 1.06 |
| YPL076W | GPI2   | 1.00 | -1.19 | 1.12  | 1.06 |
| YHR148W | IMP3   | 1.00 | -1.22 | -1.14 | 1.06 |

|         |        |      |       |       |      |
|---------|--------|------|-------|-------|------|
| YGR266W |        | 1.00 | -1.24 | -1.01 | 1.06 |
| YLR127C | APC2   | 1.00 | -1.31 | -1.09 | 1.06 |
| YMR262W |        | 1.00 | -1.31 | 1.03  | 1.06 |
| YBR101C |        | 1.00 | -1.32 | -1.02 | 1.06 |
| YLR228C | ECM22  | 1.00 | -1.35 | 1.04  | 1.06 |
| YHR163W | SOL3   | 1.00 | -1.38 | -1.18 | 1.06 |
| YPL107W |        | 1.00 | -1.40 | 1.08  | 1.06 |
| YNL072W | RNH35  | 1.00 | -1.41 | -1.01 | 1.06 |
| YLR068W | FYV7   | 1.00 | -1.48 | -1.20 | 1.06 |
| YNL088W | TOP2   | 1.00 | -1.51 | -1.06 | 1.06 |
| YJR046W | TAH11  | 1.00 | -1.52 | -1.28 | 1.06 |
| YHR172W | SPC97  | 1.00 | -1.57 | -1.30 | 1.06 |
| YNL038W | GPI15  | 1.00 | -1.57 | -1.31 | 1.06 |
| YHR116W |        | 1.00 | -1.70 | -1.04 | 1.06 |
| YBR007C |        | 1.00 | -1.82 | -1.21 | 1.06 |
| YBR217W | APG12  | 1.00 | 1.36  | 1.12  | 1.05 |
| YHL021C |        | 1.00 | 1.36  | 1.64  | 1.05 |
| YBR006W | UGA2   | 1.00 | 1.27  | -1.13 | 1.05 |
| YBR229C | ROT2   | 1.00 | 1.20  | 1.10  | 1.05 |
| YPR044C |        | 1.00 | 1.13  | -1.05 | 1.05 |
| YCL063W |        | 1.00 | 1.12  | 1.08  | 1.05 |
| YGL219C | MMM2   | 1.00 | 1.12  | 1.22  | 1.05 |
| YNL267W | PIK1   | 1.00 | 1.12  | -1.06 | 1.05 |
| YNL050C |        | 1.00 | 1.09  | 1.14  | 1.05 |
| YPR023C | EAF3   | 1.00 | 1.09  | 1.17  | 1.05 |
| YER157W | SEC34  | 1.00 | 1.06  | 1.16  | 1.05 |
| YKL050C |        | 1.00 | 1.06  | -1.03 | 1.05 |
| YBR050C | REG2   | 1.00 | 1.04  | 1.28  | 1.05 |
| YGL220W |        | 1.00 | 1.03  | 1.20  | 1.05 |
| YNL253W |        | 1.00 | 1.03  | 1.21  | 1.05 |
| YCL076W |        | 1.00 | 1.02  | -1.03 | 1.05 |
| YGR139W |        | 1.00 | 1.02  | 1.07  | 1.05 |
| YLR173W |        | 1.00 | 1.02  | 1.00  | 1.05 |
| YOL073C |        | 1.00 | 1.02  | -1.02 | 1.05 |
| YNL303W |        | 1.00 | 1.01  | 1.17  | 1.05 |
| YDR337W | MRPS28 | 1.00 | -1.01 | -1.15 | 1.05 |
| YLR298C | YHC1   | 1.00 | -1.01 | 1.16  | 1.05 |
| YPR171W |        | 1.00 | -1.02 | 1.04  | 1.05 |
| YPR018W | RLF2   | 1.00 | -1.03 | -1.03 | 1.05 |
| YER034W |        | 1.00 | -1.04 | -1.13 | 1.05 |
| YLR021W |        | 1.00 | -1.05 | 1.06  | 1.05 |
| YLR260W | LCB5   | 1.00 | -1.05 | 1.07  | 1.05 |
| YPR178W | PRP4   | 1.00 | -1.05 | 1.17  | 1.05 |
| YBR152W | SPP381 | 1.00 | -1.06 | 1.07  | 1.05 |
| YDL105W | QRI2   | 1.00 | -1.06 | -1.04 | 1.05 |
| YDR523C | SPS1   | 1.00 | -1.06 | -1.09 | 1.05 |
| YHL025W | SNF6   | 1.00 | -1.06 | 1.25  | 1.05 |
| YPL162C |        | 1.00 | -1.06 | 1.01  | 1.05 |
| YJL218W |        | 1.00 | -1.07 | 1.05  | 1.05 |
| YGR012W |        | 1.00 | -1.08 | -1.05 | 1.05 |
| YBR247C | ENP1   | 1.00 | -1.09 | -1.08 | 1.05 |
| YCL008C | STP22  | 1.00 | -1.09 | 1.03  | 1.05 |
| YPR013C |        | 1.00 | -1.12 | 1.00  | 1.05 |
| YFL041W | FET5   | 1.00 | -1.13 | -1.06 | 1.05 |
| YOR090C | PTC5   | 1.00 | -1.13 | 1.14  | 1.05 |
| YOR186W |        | 1.00 | -1.13 | -1.17 | 1.05 |
| YDR318W | MCM21  | 1.00 | -1.14 | 1.05  | 1.05 |
| YGR287C |        | 1.00 | -1.14 | -1.20 | 1.05 |
| YGR277C |        | 1.00 | -1.18 | 1.06  | 1.05 |
| YJL015C |        | 1.00 | -1.18 | -1.12 | 1.05 |
| YKL074C | MUD2   | 1.00 | -1.19 | -1.08 | 1.05 |

|         |        |      |       |       |      |
|---------|--------|------|-------|-------|------|
| YDR416W | SYF1   | 1.00 | -1.20 | -1.21 | 1.05 |
| YHR045W |        | 1.00 | -1.20 | -1.05 | 1.05 |
| YBL092W | RPL32  | 1.00 | -1.21 | -1.52 | 1.05 |
| YJL061W | NUP82  | 1.00 | -1.21 | -1.23 | 1.05 |
| YIL030C | SSM4   | 1.00 | -1.23 | 1.01  | 1.05 |
| YKL215C |        | 1.00 | -1.23 | -1.11 | 1.05 |
| YOL129W |        | 1.00 | -1.24 | 1.14  | 1.05 |
| YIL085C | KTR7   | 1.00 | -1.30 | -1.03 | 1.05 |
| YDL195W | SEC31  | 1.00 | -1.39 | -1.13 | 1.05 |
| YLR205C | HMX1   | 1.00 | -1.40 | 1.08  | 1.05 |
| YLR223C | IFH1   | 1.00 | -1.54 | -1.24 | 1.05 |
| YBL038W | MRPL16 | 1.00 | -1.57 | -1.69 | 1.05 |
| YDR422C | SIP1   | 1.00 | -1.58 | -1.11 | 1.05 |
| YOL119C |        | 1.00 | -1.81 | -1.21 | 1.05 |
| YBR053C |        | 1.00 | 1.25  | 1.09  | 1.04 |
| YBR199W | KTR4   | 1.00 | 1.17  | 1.10  | 1.04 |
| YGL064C |        | 1.00 | 1.16  | -1.02 | 1.04 |
| YPL064C |        | 1.00 | 1.16  | 1.06  | 1.04 |
| YDL146W |        | 1.00 | 1.15  | 1.09  | 1.04 |
| YHR044C | DOG1   | 1.00 | 1.15  | 1.36  | 1.04 |
| YBR077C |        | 1.00 | 1.14  | 1.17  | 1.04 |
| YDL106C | PHO2   | 1.00 | 1.14  | 1.18  | 1.04 |
| YBR017C | KAP104 | 1.00 | 1.13  | 1.12  | 1.04 |
| YDR393W | SHE9   | 1.00 | 1.12  | 1.09  | 1.04 |
| YHR066W | SSF1   | 1.00 | 1.12  | 1.02  | 1.04 |
| YDR004W | RAD57  | 1.00 | 1.11  | 1.15  | 1.04 |
| YGL149W |        | 1.00 | 1.07  | 1.02  | 1.04 |
| YDR027C | LUV1   | 1.00 | 1.06  | -1.02 | 1.04 |
| YFR008W |        | 1.00 | 1.05  | 1.36  | 1.04 |
| YLR251W |        | 1.00 | 1.05  | 1.16  | 1.04 |
| YFR032C |        | 1.00 | 1.03  | -1.10 | 1.04 |
| YIL002C | INP51  | 1.00 | 1.02  | -1.02 | 1.04 |
| YGL243W | TAD1   | 1.00 | 1.01  | -1.03 | 1.04 |
| YNL332W | THI12  | 1.00 | 1.00  | 1.05  | 1.04 |
| YCL029C | BIK1   | 1.00 | -1.01 | -1.08 | 1.04 |
| YDR512C |        | 1.00 | -1.01 | 1.09  | 1.04 |
| YBR096W |        | 1.00 | -1.03 | 1.05  | 1.04 |
| YHR154W | ESC4   | 1.00 | -1.03 | 1.39  | 1.04 |
| YJL135W |        | 1.00 | -1.03 | -1.05 | 1.04 |
| YOR250C | CLP1   | 1.00 | -1.03 | 1.05  | 1.04 |
| YBL026W | LSM2   | 1.00 | -1.04 | -1.27 | 1.04 |
| YGL142C | GPI10  | 1.00 | -1.04 | -1.22 | 1.04 |
| YPL241C | CIN2   | 1.00 | -1.04 | 1.23  | 1.04 |
| YDL020C | RPN4   | 1.00 | -1.06 | 1.10  | 1.04 |
| YLL031C | GPI13  | 1.00 | -1.07 | -1.04 | 1.04 |
| YPL013C |        | 1.00 | -1.09 | -1.03 | 1.04 |
| YIL021W | RPB3   | 1.00 | -1.10 | 1.04  | 1.04 |
| YEL006W |        | 1.00 | -1.12 | 1.04  | 1.04 |
| YNL203C |        | 1.00 | -1.12 | -1.39 | 1.04 |
| YPL048W | CAM1   | 1.00 | -1.12 | 1.10  | 1.04 |
| YNR067C |        | 1.00 | -1.13 | -1.18 | 1.04 |
| YDL210W | UGA4   | 1.00 | -1.15 | -1.20 | 1.04 |
| YIL095W | PRK1   | 1.00 | -1.15 | -1.02 | 1.04 |
| YKL216W | URA1   | 1.00 | -1.15 | 1.13  | 1.04 |
| YJL016W |        | 1.00 | -1.16 | -1.15 | 1.04 |
| YPR120C | CLB5   | 1.00 | -1.18 | -1.01 | 1.04 |
| YGR115C |        | 1.00 | -1.21 | 1.03  | 1.04 |
| YDL144C |        | 1.00 | -1.22 | -1.20 | 1.04 |
| YDR210W |        | 1.00 | -1.22 | -1.10 | 1.04 |
| YGR147C | NAT2   | 1.00 | -1.24 | -1.24 | 1.04 |
| YDR475C |        | 1.00 | -1.25 | -1.16 | 1.04 |

|         |       |      |       |       |      |
|---------|-------|------|-------|-------|------|
| YGL203C | KEX1  | 1.00 | -1.25 | -1.21 | 1.04 |
| YGR272C |       | 1.00 | -1.26 | -1.13 | 1.04 |
| YMR251W |       | 1.00 | -1.27 | -1.06 | 1.04 |
| YGL172W | NUP49 | 1.00 | -1.28 | -1.09 | 1.04 |
| YGL210W | YPT32 | 1.00 | -1.29 | -1.20 | 1.04 |
| YOR195W | SLK19 | 1.00 | -1.30 | -1.11 | 1.04 |
| YHR105W |       | 1.00 | -1.36 | -1.12 | 1.04 |
| YLR232W |       | 1.00 | -1.41 | -1.04 | 1.04 |
| YOR205C |       | 1.00 | -1.42 | -1.12 | 1.04 |
| YAL004W |       | 1.00 | -1.52 | -1.76 | 1.04 |
| YFL006W |       | 1.00 | -1.59 | -1.10 | 1.04 |
| YDR091C | RLI1  | 1.00 | -1.75 | -1.13 | 1.04 |
| YJR049C | UTR1  | 1.00 | -1.76 | -1.38 | 1.04 |
| YDL169C | UGX2  | 1.00 | 1.45  | 1.24  | 1.03 |
| YGR178C | PBP1  | 1.00 | 1.34  | 1.36  | 1.03 |
| YJL161W |       | 1.00 | 1.24  | 1.19  | 1.03 |
| YMR279C |       | 1.00 | 1.24  | 1.08  | 1.03 |
| YBR052C |       | 1.00 | 1.18  | 1.13  | 1.03 |
| YGR278W |       | 1.00 | 1.18  | 1.13  | 1.03 |
| YHL002W |       | 1.00 | 1.18  | 1.11  | 1.03 |
| YFR057W |       | 1.00 | 1.17  | 1.09  | 1.03 |
| YDR003W |       | 1.00 | 1.16  | 1.16  | 1.03 |
| YGR141W |       | 1.00 | 1.16  | 1.06  | 1.03 |
| YNL018C |       | 1.00 | 1.12  | 1.01  | 1.03 |
| YMR024W | MRPL3 | 1.00 | 1.09  | 1.06  | 1.03 |
| YPL139C | UME1  | 1.00 | 1.06  | -1.08 | 1.03 |
| YBR257W | POP4  | 1.00 | 1.05  | 1.19  | 1.03 |
| YBR288C | APM3  | 1.00 | 1.05  | -1.02 | 1.03 |
| YER185W |       | 1.00 | 1.05  | -1.01 | 1.03 |
| YOR279C |       | 1.00 | 1.05  | 1.14  | 1.03 |
| YGL136C |       | 1.00 | 1.04  | 1.13  | 1.03 |
| YDR325W | YCG1  | 1.00 | 1.03  | 1.00  | 1.03 |
| YGR205W |       | 1.00 | 1.03  | 1.14  | 1.03 |
| YMR004W | MVP1  | 1.00 | 1.03  | 1.02  | 1.03 |
| YIL114C | POR2  | 1.00 | 1.02  | -1.07 | 1.03 |
| YOR308C | SNU66 | 1.00 | 1.02  | 1.00  | 1.03 |
| YLR077W |       | 1.00 | 1.00  | -1.12 | 1.03 |
| YGR040W | KSS1  | 1.00 | -1.01 | -1.03 | 1.03 |
| YBL082C | RHK1  | 1.00 | -1.02 | -1.08 | 1.03 |
| YGR127W |       | 1.00 | -1.02 | -1.06 | 1.03 |
| YHR131C |       | 1.00 | -1.02 | -1.24 | 1.03 |
| YNR040W |       | 1.00 | -1.02 | 1.04  | 1.03 |
| YPL177C | CUP9  | 1.00 | -1.02 | 1.09  | 1.03 |
| YDL017W | CDC7  | 1.00 | -1.04 | 1.06  | 1.03 |
| YKR021W |       | 1.00 | -1.04 | -1.11 | 1.03 |
| YMR009W |       | 1.00 | -1.06 | 1.24  | 1.03 |
| YNR064C |       | 1.00 | -1.06 | 1.14  | 1.03 |
| YLL014W |       | 1.00 | -1.07 | 1.06  | 1.03 |
| YDR034C | LYS14 | 1.00 | -1.08 | -1.02 | 1.03 |
| YPR179C | PLO1  | 1.00 | -1.08 | 1.09  | 1.03 |
| YIL027C | KRE27 | 1.00 | -1.10 | 1.10  | 1.03 |
| YOL155C |       | 1.00 | -1.11 | 1.45  | 1.03 |
| YPR089W |       | 1.00 | -1.13 | 1.06  | 1.03 |
| YNL283C | WSC2  | 1.00 | -1.14 | -1.05 | 1.03 |
| YPR186C | PZF1  | 1.00 | -1.16 | -1.04 | 1.03 |
| YBR154C | RPB5  | 1.00 | -1.18 | -1.32 | 1.03 |
| YKL032C | IXR1  | 1.00 | -1.18 | 1.29  | 1.03 |
| YDR137W | RGP1  | 1.00 | -1.19 | 1.19  | 1.03 |
| YNR007C | AUT1  | 1.00 | -1.19 | 1.22  | 1.03 |
| YDL237W |       | 1.00 | -1.20 | 1.09  | 1.03 |
| YHL028W | WSC4  | 1.00 | -1.20 | 1.02  | 1.03 |

|         |       |      |       |       |      |
|---------|-------|------|-------|-------|------|
| YBR271W |       | 1.00 | -1.21 | -1.24 | 1.03 |
| YNL249C | MPA43 | 1.00 | -1.21 | 1.08  | 1.03 |
| YLR183C | TOS4  | 1.00 | -1.23 | -1.11 | 1.03 |
| YAL019W | FUN30 | 1.00 | -1.25 | -1.04 | 1.03 |
| YOL066C | RIB2  | 1.00 | -1.25 | -1.18 | 1.03 |
| YBR172C | SMY2  | 1.00 | -1.26 | -1.14 | 1.03 |
| YDR469W | SDC1  | 1.00 | -1.26 | -1.16 | 1.03 |
| YNL237W | YTP1  | 1.00 | -1.27 | -1.10 | 1.03 |
| YDR351W | SBE2  | 1.00 | -1.28 | -1.03 | 1.03 |
| YCL048W |       | 1.00 | -1.30 | -1.06 | 1.03 |
| YDR130C | FIN1  | 1.00 | -1.31 | 1.03  | 1.03 |
| YJL143W | TIM17 | 1.00 | -1.31 | -1.33 | 1.03 |
| YNR023W | SNF12 | 1.00 | -1.38 | -1.05 | 1.03 |
| YLR088W | GAA1  | 1.00 | -1.44 | -1.08 | 1.03 |
| YLR401C |       | 1.00 | -1.51 | 1.02  | 1.03 |
| YDR334W | SWR1  | 1.00 | -1.52 | -1.35 | 1.03 |
| YBR267W |       | 1.00 | -1.54 | -1.32 | 1.03 |
| YFL023W | FYV11 | 1.00 | -1.58 | -1.22 | 1.03 |
| YLR130C | ZRT2  | 1.00 | -1.59 | -1.26 | 1.03 |
| YHL043W | ECM34 | 1.00 | -1.60 | -1.23 | 1.03 |
| YPL265W | DIP5  | 1.00 | -1.66 | -1.32 | 1.03 |
| YGR252W | GCN5  | 1.00 | -1.82 | -1.11 | 1.03 |
| YEL045C |       | 1.00 | -1.97 | -1.71 | 1.03 |
| YJR136C |       | 1.00 | -2.19 | 1.04  | 1.03 |
| YIL162W | SUC2  | 1.00 | 3.37  | 4.15  | 1.02 |
| YCL052C | PBN1  | 1.00 | 1.42  | 1.68  | 1.02 |
| YHR178W | STB5  | 1.00 | 1.24  | -1.02 | 1.02 |
| YOL032W |       | 1.00 | 1.21  | 1.54  | 1.02 |
| YBR136W | MEC1  | 1.00 | 1.16  | 1.14  | 1.02 |
| YNL006W | LST8  | 1.00 | 1.15  | 1.06  | 1.02 |
| YOL096C | COQ3  | 1.00 | 1.15  | 1.06  | 1.02 |
| YOR122C | PFY1  | 1.00 | 1.12  | 1.21  | 1.02 |
| YBL052C | SAS3  | 1.00 | 1.11  | 1.04  | 1.02 |
| YBR224W |       | 1.00 | 1.11  | 1.25  | 1.02 |
| YHR207C |       | 1.00 | 1.11  | 1.16  | 1.02 |
| YCL069W |       | 1.00 | 1.10  | 1.00  | 1.02 |
| YBR302C | COS2  | 1.00 | 1.09  | -1.03 | 1.02 |
| YDL164C | CDC9  | 1.00 | 1.09  | 1.11  | 1.02 |
| YDR350C | TCM10 | 1.00 | 1.09  | 1.02  | 1.02 |
| YMR301C | ATM1  | 1.00 | 1.08  | 1.31  | 1.02 |
| YNL136W |       | 1.00 | 1.08  | 1.05  | 1.02 |
| YDR252W | BTT1  | 1.00 | 1.04  | -1.07 | 1.02 |
| YJL082W | IML2  | 1.00 | 1.04  | 1.00  | 1.02 |
| YNL093W | YPT53 | 1.00 | 1.04  | 1.30  | 1.02 |
| YPL242C | IQG1  | 1.00 | 1.04  | 1.08  | 1.02 |
| YPR129W | SCD6  | 1.00 | 1.04  | 1.08  | 1.02 |
| YBR192W | RIM2  | 1.00 | 1.03  | -1.11 | 1.02 |
| YHR132C | ECM14 | 1.00 | 1.03  | 1.06  | 1.02 |
| YJL090C | DPB11 | 1.00 | 1.03  | -1.17 | 1.02 |
| YGL095C | VPS45 | 1.00 | 1.02  | 1.21  | 1.02 |
| YJL003W |       | 1.00 | 1.02  | 1.05  | 1.02 |
| YJL031C | BET4  | 1.00 | 1.02  | 1.05  | 1.02 |
| YNL325C | FIG4  | 1.00 | 1.02  | 1.21  | 1.02 |
| YKL177W |       | 1.00 | 1.01  | -1.09 | 1.02 |
| YFL012W |       | 1.00 | 1.00  | -1.05 | 1.02 |
| YJL100W | LSB6  | 1.00 | 1.00  | 1.09  | 1.02 |
| YCR104W | PAU3  | 1.00 | -1.01 | -1.01 | 1.02 |
| YNR005C |       | 1.00 | -1.01 | 1.14  | 1.02 |
| YDR419W | RAD30 | 1.00 | -1.02 | -1.21 | 1.02 |
| YGL124C | MON1  | 1.00 | -1.03 | 1.16  | 1.02 |
| YIR021W | MRS1  | 1.00 | -1.03 | 1.04  | 1.02 |



|         |           |      |       |       |      |
|---------|-----------|------|-------|-------|------|
| YNL079C | TPM1      | 1.00 | -1.03 | 1.18  | 1.02 |
| YDR289C | RTT103    | 1.00 | -1.04 | 1.02  | 1.02 |
| YGR280C |           | 1.00 | -1.04 | 1.13  | 1.02 |
| YNR032W | PPG1      | 1.00 | -1.04 | -1.05 | 1.02 |
| YDL063C |           | 1.00 | -1.05 | -1.06 | 1.02 |
| YPL270W | MDL2      | 1.00 | -1.05 | 1.04  | 1.02 |
| YEL020C |           | 1.00 | -1.06 | -1.10 | 1.02 |
| YCL067C | HMLALPHA2 | 1.00 | -1.07 | 1.14  | 1.02 |
| YDR052C | DBF4      | 1.00 | -1.07 | 1.05  | 1.02 |
| YDR392W | SPT3      | 1.00 | -1.07 | -1.06 | 1.02 |
| YDR499W | LCD1      | 1.00 | -1.07 | -1.09 | 1.02 |
| YGR101W |           | 1.00 | -1.08 | -1.04 | 1.02 |
| YGR223C |           | 1.00 | -1.09 | 1.52  | 1.02 |
| YLR032W | RAD5      | 1.00 | -1.10 | 1.04  | 1.02 |
| YBR159W |           | 1.00 | -1.12 | -1.06 | 1.02 |
| YDR332W |           | 1.00 | -1.12 | 1.06  | 1.02 |
| YML113W | DAT1      | 1.00 | -1.13 | -1.06 | 1.02 |
| YNL042W | BOP3      | 1.00 | -1.13 | -1.05 | 1.02 |
| YDR083W | RRP8      | 1.00 | -1.15 | 1.05  | 1.02 |
| YDR528W | HLR1      | 1.00 | -1.15 | -1.05 | 1.02 |
| YHL044W |           | 1.00 | -1.16 | -1.12 | 1.02 |
| YDR544C |           | 1.00 | -1.17 | -1.10 | 1.02 |
| YAR062W |           | 1.00 | -1.19 | -1.03 | 1.02 |
| YCL010C |           | 1.00 | -1.19 | -1.02 | 1.02 |
| YDL165W | CDC36     | 1.00 | -1.19 | -1.06 | 1.02 |
| YIL149C | MLP2      | 1.00 | -1.19 | -1.02 | 1.02 |
| YAL065C |           | 1.00 | -1.20 | 1.09  | 1.02 |
| YCR022C |           | 1.00 | -1.20 | 1.02  | 1.02 |
| YIR031C | DAL7      | 1.00 | -1.21 | -1.02 | 1.02 |
| YBR145W | ADH5      | 1.00 | -1.24 | -1.11 | 1.02 |
| YDR363W | ESC2      | 1.00 | -1.24 | -1.02 | 1.02 |
| YGL168W |           | 1.00 | -1.24 | -1.05 | 1.02 |
| YKL155C | RSM22     | 1.00 | -1.24 | -1.05 | 1.02 |
| YDR256C | CTA1      | 1.00 | -1.25 | -1.09 | 1.02 |
| YPL221W | BOP1      | 1.00 | -1.26 | -1.23 | 1.02 |
| YDR135C | YCF1      | 1.00 | -1.28 | -1.08 | 1.02 |
| YJR002W | MPP10     | 1.00 | -1.30 | 1.13  | 1.02 |
| YNL105W |           | 1.00 | -1.32 | -1.11 | 1.02 |
| YMR136W | GAT2      | 1.00 | -1.33 | -1.01 | 1.02 |
| YLR371W | ROM2      | 1.00 | -1.34 | -1.20 | 1.02 |
| YDL196W |           | 1.00 | -1.37 | -1.24 | 1.02 |
| YMR312W | TOT6      | 1.00 | -1.37 | -1.04 | 1.02 |
| YLR338W | KRE21     | 1.00 | -1.49 | -1.33 | 1.02 |
| YOR011W | AUS1      | 1.00 | -1.49 | -1.13 | 1.02 |
| YMR105C | PGM2      | 1.00 | 3.13  | 3.33  | 1.01 |
| YDR476C |           | 1.00 | 1.57  | 2.18  | 1.01 |
| YNR060W | FRE4      | 1.00 | 1.34  | 1.02  | 1.01 |
| YNL147W | LSM7      | 1.00 | 1.32  | 1.20  | 1.01 |
| YMR022W | QRI8      | 1.00 | 1.16  | 1.22  | 1.01 |
| YER050C | RSM18     | 1.00 | 1.13  | 1.15  | 1.01 |
| YNL277W | MET2      | 1.00 | 1.10  | -1.06 | 1.01 |
| YOR253W |           | 1.00 | 1.10  | -1.02 | 1.01 |
| YFR004W | RPN11     | 1.00 | 1.07  | 1.31  | 1.01 |
| YOR379C |           | 1.00 | 1.07  | 1.00  | 1.01 |
| YDR438W |           | 1.00 | 1.06  | 1.00  | 1.01 |
| YHL038C | CBP2      | 1.00 | 1.06  | 1.01  | 1.01 |
| YAR018C | KIN3      | 1.00 | 1.05  | 1.02  | 1.01 |
| YKL037W |           | 1.00 | 1.04  | 1.05  | 1.01 |
| YML057W | CMP2      | 1.00 | 1.04  | 1.06  | 1.01 |
| YNL044W | YIP3      | 1.00 | 1.04  | -1.07 | 1.01 |
| YDR129C | SAC6      | 1.00 | 1.03  | 1.52  | 1.01 |

|         |        |      |       |       |      |
|---------|--------|------|-------|-------|------|
| YEL074W |        | 1.00 | 1.03  | 1.10  | 1.01 |
| YPR139C |        | 1.00 | 1.03  | 1.03  | 1.01 |
| YOL091W | SPO21  | 1.00 | 1.02  | -1.20 | 1.01 |
| YKL206C |        | 1.00 | 1.00  | 1.15  | 1.01 |
| YML098W | TAF19  | 1.00 | 1.00  | 1.09  | 1.01 |
| YPL195W | APL5   | 1.00 | 1.00  | 1.11  | 1.01 |
| YIL063C | YRB2   | 1.00 | -1.01 | -1.05 | 1.01 |
| YNR075W | COS10  | 1.00 | -1.01 | -1.06 | 1.01 |
| YBL098W |        | 1.00 | -1.02 | 1.00  | 1.01 |
| YDR541C |        | 1.00 | -1.02 | -1.03 | 1.01 |
| YDR193W |        | 1.00 | -1.03 | 1.01  | 1.01 |
| YNL289W | PCL1   | 1.00 | -1.03 | 1.14  | 1.01 |
| YBR034C | HMT1   | 1.00 | -1.04 | -1.28 | 1.01 |
| YGR189C | CRH1   | 1.00 | -1.04 | -1.10 | 1.01 |
| YOR246C |        | 1.00 | -1.04 | -1.09 | 1.01 |
| YNL019C |        | 1.00 | -1.05 | 1.07  | 1.01 |
| YNL295W |        | 1.00 | -1.06 | 1.04  | 1.01 |
| YJL220W |        | 1.00 | -1.07 | -1.01 | 1.01 |
| YNL229C | URE2   | 1.00 | -1.07 | -1.06 | 1.01 |
| YDR024W | FYV1   | 1.00 | -1.09 | -1.02 | 1.01 |
| YER115C | SPR6   | 1.00 | -1.10 | -1.02 | 1.01 |
| YGL127C | SOH1   | 1.00 | -1.10 | -1.17 | 1.01 |
| YNL278W | CAF120 | 1.00 | -1.10 | -1.10 | 1.01 |
| YOL026C |        | 1.00 | -1.10 | 1.02  | 1.01 |
| YPL272C |        | 1.00 | -1.10 | -1.02 | 1.01 |
| YJL084C |        | 1.00 | -1.11 | -1.16 | 1.01 |
| YJL117W | PHO86  | 1.00 | -1.11 | -1.08 | 1.01 |
| YIR008C | PRI1   | 1.00 | -1.12 | 1.15  | 1.01 |
| YOR345C |        | 1.00 | -1.12 | -1.03 | 1.01 |
| YBL016W | FUS3   | 1.00 | -1.13 | -1.10 | 1.01 |
| YLR357W | RSC2   | 1.00 | -1.14 | -1.32 | 1.01 |
| YNL204C | SPS18  | 1.00 | -1.14 | 1.05  | 1.01 |
| YJL125C | GCD14  | 1.00 | -1.15 | 1.12  | 1.01 |
| YBR183W | YPC1   | 1.00 | -1.16 | -1.12 | 1.01 |
| YIL092W |        | 1.00 | -1.16 | -1.09 | 1.01 |
| YNL124W |        | 1.00 | -1.16 | -1.15 | 1.01 |
| YHR210C |        | 1.00 | -1.17 | 1.01  | 1.01 |
| YJL099W | CHS6   | 1.00 | -1.18 | -1.06 | 1.01 |
| YHR029C |        | 1.00 | -1.19 | -1.05 | 1.01 |
| YIR019C | MUC1   | 1.00 | -1.19 | 1.11  | 1.01 |
| YDR390C | UBA2   | 1.00 | -1.20 | 1.06  | 1.01 |
| YPL156C | PRM4   | 1.00 | -1.20 | 1.06  | 1.01 |
| YFL013C | IES1   | 1.00 | -1.23 | -1.03 | 1.01 |
| YNL266W |        | 1.00 | -1.31 | -1.06 | 1.01 |
| YDR146C | SWI5   | 1.00 | -1.37 | -1.08 | 1.01 |
| YOR151C | RPB2   | 1.00 | -1.44 | 1.03  | 1.01 |
| YDR167W | TAF25  | 1.00 | -1.46 | -1.12 | 1.01 |
| YOR118W |        | 1.00 | -1.46 | -1.14 | 1.01 |
| YPL191C |        | 1.00 | -1.55 | 1.08  | 1.01 |
| YCR020C | PET18  | 1.00 | 1.01  | -1.02 | 1.01 |
| YBL031W | SHE1   | 1.00 | 1.27  | 1.14  | 1.00 |
| YDR455C |        | 1.00 | 1.19  | 1.27  | 1.00 |
| YJR011C |        | 1.00 | 1.19  | 1.13  | 1.00 |
| YPL277C |        | 1.00 | 1.16  | 1.12  | 1.00 |
| YMR088C |        | 1.00 | 1.13  | 1.05  | 1.00 |
| YNL239W | LAP3   | 1.00 | 1.13  | 1.10  | 1.00 |
| YPR093C |        | 1.00 | 1.13  | 1.08  | 1.00 |
| YGL154C | LYS5   | 1.00 | 1.12  | 1.11  | 1.00 |
| YNR069C |        | 1.00 | 1.10  | 1.15  | 1.00 |
| YDR431W |        | 1.00 | 1.09  | 1.00  | 1.00 |
| YBR236C | ABD1   | 1.00 | 1.08  | 1.02  | 1.00 |

|         |       |      |       |       |      |
|---------|-------|------|-------|-------|------|
| YJR013W |       | 1.00 | 1.08  | -1.01 | 1.00 |
| YOL156W | HXT11 | 1.00 | 1.08  | 1.17  | 1.00 |
| YLR393W | ATP10 | 1.00 | 1.06  | 1.03  | 1.00 |
| YBR070C |       | 1.00 | 1.05  | 1.03  | 1.00 |
| YPL194W | DDC1  | 1.00 | 1.04  | 1.06  | 1.00 |
| YAL010C | MDM10 | 1.00 | 1.03  | 1.02  | 1.00 |
| YBL086C |       | 1.00 | 1.03  | 1.03  | 1.00 |
| YBR046C | ZTA1  | 1.00 | 1.03  | -1.09 | 1.00 |
| YJL162C |       | 1.00 | 1.01  | 1.00  | 1.00 |
| YPL124W | NIP29 | 1.00 | 1.01  | -1.09 | 1.00 |
| YLR125W |       | 1.00 | -1.01 | -1.01 | 1.00 |
| YOR278W | HEM4  | 1.00 | -1.02 | 1.13  | 1.00 |
| YMR255W | GFD1  | 1.00 | -1.03 | 1.00  | 1.00 |
| YFR046C |       | 1.00 | -1.05 | -1.14 | 1.00 |
| YKR060W |       | 1.00 | -1.05 | -1.17 | 1.00 |
| YNL159C | ASI2  | 1.00 | -1.05 | 1.10  | 1.00 |
| YPR079W | MRL1  | 1.00 | -1.05 | -1.06 | 1.00 |
| YDR396W |       | 1.00 | -1.06 | -1.05 | 1.00 |
| YGL151W | NUT1  | 1.00 | -1.06 | -1.12 | 1.00 |
| YGR286C | BIO2  | 1.00 | -1.07 | -1.06 | 1.00 |
| YOR128C | ADE2  | 1.00 | -1.07 | 1.04  | 1.00 |
| YBL109W |       | 1.00 | -1.08 | -1.10 | 1.00 |
| YDR015C |       | 1.00 | -1.08 | -1.06 | 1.00 |
| YDR352W |       | 1.00 | -1.09 | 1.31  | 1.00 |
| YDR428C |       | 1.00 | -1.09 | -1.06 | 1.00 |
| YDR011W | SNQ2  | 1.00 | -1.12 | -1.28 | 1.00 |
| YER155C | BEM2  | 1.00 | -1.12 | -1.14 | 1.00 |
| YHR086W | NAM8  | 1.00 | -1.12 | -1.30 | 1.00 |
| YOR236W | DFR1  | 1.00 | -1.12 | -1.17 | 1.00 |
| YPL060W | LPE10 | 1.00 | -1.12 | 1.05  | 1.00 |
| YOR306C |       | 1.00 | -1.13 | -1.28 | 1.00 |
| YLL047W |       | 1.00 | -1.14 | -1.11 | 1.00 |
| YPL102C | KRE24 | 1.00 | -1.14 | 1.01  | 1.00 |
| YJL013C | MAD3  | 1.00 | -1.15 | 1.26  | 1.00 |
| YOL138C |       | 1.00 | -1.15 | -1.03 | 1.00 |
| YOR149C | SMP3  | 1.00 | -1.16 | -1.04 | 1.00 |
| YLR159W |       | 1.00 | -1.17 | -1.04 | 1.00 |
| YOR091W |       | 1.00 | -1.17 | 1.00  | 1.00 |
| YGR121C | MEP1  | 1.00 | -1.18 | -1.26 | 1.00 |
| YLR096W | KIN2  | 1.00 | -1.18 | -1.22 | 1.00 |
| YDR280W | RRP45 | 1.00 | -1.19 | 1.10  | 1.00 |
| YNL123W |       | 1.00 | -1.19 | -1.02 | 1.00 |
| YPR077C |       | 1.00 | -1.20 | 1.03  | 1.00 |
| YOR226C | ISU2  | 1.00 | -1.21 | -1.28 | 1.00 |
| YFR028C | CDC14 | 1.00 | -1.24 | -1.02 | 1.00 |
| YER187W |       | 1.00 | -1.26 | -1.18 | 1.00 |
| YMR186W | HSC82 | 1.00 | -1.26 | 1.14  | 1.00 |
| YOR104W | PIN2  | 1.00 | -1.26 | -1.27 | 1.00 |
| YAL029C | MYO4  | 1.00 | -1.29 | -1.17 | 1.00 |
| YMR122C |       | 1.00 | -1.29 | -1.13 | 1.00 |
| YML008C | ERG6  | 1.00 | -1.31 | 1.04  | 1.00 |
| YGL246C | RAI1  | 1.00 | -1.32 | -1.13 | 1.00 |
| YGL042C |       | 1.00 | -1.33 | -1.01 | 1.00 |
| YJL179W | PFD1  | 1.00 | -1.33 | -1.52 | 1.00 |
| YDR410C | STE14 | 1.00 | -1.36 | 1.01  | 1.00 |
| YGR013W | SNU71 | 1.00 | -1.40 | -1.13 | 1.00 |
| YHR155W |       | 1.00 | -1.40 | -1.08 | 1.00 |
| YBR187W |       | 1.00 | -1.42 | -1.30 | 1.00 |
| YLR313C | SPH1  | 1.00 | -1.42 | -1.22 | 1.00 |
| YLR151C | PCD1  | 1.00 | -1.87 | -1.27 | 1.00 |
| YJR016C | ILV3  | 1.00 | -1.94 | -1.33 | 1.00 |

|         |        |      |       |       |       |
|---------|--------|------|-------|-------|-------|
| YDR279W |        | 1.00 | 1.40  | 1.39  | -1.01 |
| YHL048W | COS8   | 1.00 | 1.27  | 1.19  | -1.01 |
| YDR100W |        | 1.00 | 1.24  | 1.06  | -1.01 |
| YDL202W | MRPL11 | 1.00 | 1.23  | 1.18  | -1.01 |
| YBL035C | POL12  | 1.00 | 1.22  | 1.04  | -1.01 |
| YJR115W |        | 1.00 | 1.19  | 1.21  | -1.01 |
| YGR052W |        | 1.00 | 1.18  | 1.12  | -1.01 |
| YNL215W | IES2   | 1.00 | 1.18  | -1.05 | -1.01 |
| YJL140W | RPB4   | 1.00 | 1.17  | 1.05  | -1.01 |
| YMR134W |        | 1.00 | 1.17  | 1.18  | -1.01 |
| YGR195W | SKI6   | 1.00 | 1.16  | 1.12  | -1.01 |
| YGL146C |        | 1.00 | 1.15  | 1.03  | -1.01 |
| YCR026C |        | 1.00 | 1.14  | -1.02 | -1.01 |
| YKR003W | OSH6   | 1.00 | 1.14  | 1.28  | -1.01 |
| YOL044W | PEX15  | 1.00 | 1.14  | -1.07 | -1.01 |
| YDR380W | ARO10  | 1.00 | 1.13  | 1.29  | -1.01 |
| YGL033W | HOP2   | 1.00 | 1.13  | 1.27  | -1.01 |
| YPL215W | CBP3   | 1.00 | 1.13  | 1.13  | -1.01 |
| YDR328C | SKP1   | 1.00 | 1.12  | 1.37  | -1.01 |
| YBR019C | GAL10  | 1.00 | 1.11  | 1.02  | -1.01 |
| YDR066C |        | 1.00 | 1.11  | 1.03  | -1.01 |
| YDR110W | FOB1   | 1.00 | 1.10  | 1.12  | -1.01 |
| YGL034C |        | 1.00 | 1.09  | 1.42  | -1.01 |
| YLR311C |        | 1.00 | 1.07  | 1.01  | -1.01 |
| YCR086W | CSM1   | 1.00 | 1.05  | -1.13 | -1.01 |
| YKL040C | NFU1   | 1.00 | 1.05  | -1.02 | -1.01 |
| YBR039W | ATP3   | 1.00 | 1.04  | -1.25 | -1.01 |
| YAL031C | FUN21  | 1.00 | 1.03  | 1.08  | -1.01 |
| YIL106W | MOB1   | 1.00 | 1.03  | 1.12  | -1.01 |
| YPL018W | CTF19  | 1.00 | 1.03  | -1.07 | -1.01 |
| YDL133W |        | 1.00 | 1.02  | -1.15 | -1.01 |
| YPL068C |        | 1.00 | 1.02  | -1.11 | -1.01 |
| YGL232W |        | 1.00 | 1.01  | -1.08 | -1.01 |
| YPL233W |        | 1.00 | 1.01  | -1.11 | -1.01 |
| YJR106W | ECM27  | 1.00 | 1.00  | 1.12  | -1.01 |
| YPL042C | SSN3   | 1.00 | 1.00  | -1.03 | -1.01 |
| YIL012W |        | 1.00 | -1.01 | -1.04 | -1.01 |
| YML047C | PRM6   | 1.00 | -1.01 | -1.06 | -1.01 |
| YPR094W |        | 1.00 | -1.01 | -1.02 | -1.01 |
| YLR254C |        | 1.00 | -1.03 | -1.11 | -1.01 |
| YOR262W |        | 1.00 | -1.03 | 1.31  | -1.01 |
| YPL063W |        | 1.00 | -1.03 | 1.12  | -1.01 |
| YJL219W | HXT9   | 1.00 | -1.04 | 1.05  | -1.01 |
| YKL223W |        | 1.00 | -1.04 | -1.01 | -1.01 |
| YMR138W | CIN4   | 1.00 | -1.04 | 1.01  | -1.01 |
| YOR273C | TPO4   | 1.00 | -1.04 | 1.09  | -1.01 |
| YCR085W |        | 1.00 | -1.05 | -1.08 | -1.01 |
| YJR091C | JSN1   | 1.00 | -1.06 | -1.05 | -1.01 |
| YBL057C |        | 1.00 | -1.07 | -1.07 | -1.01 |
| YBR099C |        | 1.00 | -1.07 | 1.00  | -1.01 |
| YMR128W | ECM16  | 1.00 | -1.07 | -1.08 | -1.01 |
| YER039C | HVG1   | 1.00 | -1.08 | -1.02 | -1.01 |
| YMR239C | RNT1   | 1.00 | -1.08 | 1.11  | -1.01 |
| YBR055C | PRP6   | 1.00 | -1.09 | -1.10 | -1.01 |
| YLR239C | LIP2   | 1.00 | -1.09 | -1.15 | -1.01 |
| YML083C |        | 1.00 | -1.10 | 1.00  | -1.01 |
| YBR100W |        | 1.00 | -1.11 | -1.21 | -1.01 |
| YPL255W | BBP1   | 1.00 | -1.11 | -1.07 | -1.01 |
| YBR252W | DUT1   | 1.00 | -1.12 | -1.12 | -1.01 |
| YDR098C | GRX3   | 1.00 | -1.12 | -1.15 | -1.01 |
| YJL097W |        | 1.00 | -1.12 | -1.07 | -1.01 |

|         |        |      |       |       |       |
|---------|--------|------|-------|-------|-------|
| YNL297C | MON2   | 1.00 | -1.13 | -1.11 | -1.01 |
| YER140W |        | 1.00 | -1.15 | -1.01 | -1.01 |
| YKL042W | SPC42  | 1.00 | -1.15 | -1.12 | -1.01 |
| YML130C | ERO1   | 1.00 | -1.16 | -1.15 | -1.01 |
| YLL063C | AYT1   | 1.00 | -1.20 | -1.01 | -1.01 |
| YOR193W |        | 1.00 | -1.22 | -1.09 | -1.01 |
| YAL011W |        | 1.00 | -1.24 | -1.14 | -1.01 |
| YAL016W | TPD3   | 1.00 | -1.25 | -1.28 | -1.01 |
| YHR205W | SCH9   | 1.00 | -1.27 | -1.03 | -1.01 |
| YKL218C | SRY1   | 1.00 | -1.27 | -1.17 | -1.01 |
| YPR009W |        | 1.00 | -1.28 | -1.03 | -1.01 |
| YKL126W | YPK1   | 1.00 | -1.29 | -1.03 | -1.01 |
| YLR301W |        | 1.00 | -1.29 | -1.43 | -1.01 |
| YDR227W | SIR4   | 1.00 | -1.32 | -1.06 | -1.01 |
| YKR050W | TRK2   | 1.00 | -1.35 | -1.10 | -1.01 |
| YPL072W | UBP16  | 1.00 | -1.35 | -1.12 | -1.01 |
| YHR069C | RRP4   | 1.00 | -1.40 | -1.08 | -1.01 |
| YLR148W | PEP3   | 1.00 | -1.41 | -1.15 | -1.01 |
| YLR131C | ACE2   | 1.00 | -1.45 | -1.26 | -1.01 |
| YPR060C | ARO7   | 1.00 | -1.45 | -1.09 | -1.01 |
| YAL059W | ECM1   | 1.00 | -1.46 | -1.34 | -1.01 |
| YLR240W | VPS34  | 1.00 | -1.53 | -1.18 | -1.01 |
| YBR013C |        | 1.00 | -1.59 | -1.27 | -1.01 |
| YFR021W | AUT10  | 1.00 | -1.60 | -1.39 | -1.01 |
| YGR103W | RRP13  | 1.00 | -1.74 | -1.22 | -1.01 |
| YJL206C |        | 1.00 | -1.74 | 1.18  | -1.01 |
| YBR107C | IML3   | 1.00 | -1.88 | -1.53 | -1.01 |
| YBR214W | SDS24  | 1.00 | 1.36  | 1.09  | -1.02 |
| YHL034C | SBP1   | 1.00 | 1.27  | 1.28  | -1.02 |
| YPL022W | RAD1   | 1.00 | 1.20  | -1.05 | -1.02 |
| YKL098W |        | 1.00 | 1.19  | -1.01 | -1.02 |
| YAR027W |        | 1.00 | 1.17  | 1.31  | -1.02 |
| YLR394W | CST9   | 1.00 | 1.16  | -1.04 | -1.02 |
| YCR025C |        | 1.00 | 1.13  | -1.03 | -1.02 |
| YPL164C | MLH3   | 1.00 | 1.11  | 1.06  | -1.02 |
| YML101C |        | 1.00 | 1.10  | 1.02  | -1.02 |
| YKR022C |        | 1.00 | 1.09  | 1.13  | -1.02 |
| YIL154C | IMP2'  | 1.00 | 1.04  | 1.16  | -1.02 |
| YMR111C |        | 1.00 | 1.04  | -1.15 | -1.02 |
| YGL053W | PRM8   | 1.00 | 1.03  | 1.33  | -1.02 |
| YHR013C | ARD1   | 1.00 | 1.03  | -1.02 | -1.02 |
| YIL040W |        | 1.00 | 1.03  | -1.04 | -1.02 |
| YLR080W |        | 1.00 | 1.03  | -1.03 | -1.02 |
| YBR157C | ICS2   | 1.00 | 1.02  | 1.00  | -1.02 |
| YGL058W | RAD6   | 1.00 | 1.02  | -1.19 | -1.02 |
| YOR265W | RBL2   | 1.00 | 1.02  | 1.06  | -1.02 |
| YGR051C |        | 1.00 | 1.00  | 1.00  | -1.02 |
| YJL017W |        | 1.00 | 1.00  | -1.20 | -1.02 |
| YLR166C | SEC10  | 1.00 | 1.00  | 1.02  | -1.02 |
| YNL035C |        | 1.00 | 1.00  | -1.01 | -1.02 |
| YOL014W |        | 1.00 | 1.00  | 1.04  | -1.02 |
| YBR174C |        | 1.00 | -1.01 | -1.03 | -1.02 |
| YDL011C |        | 1.00 | -1.01 | 1.01  | -1.02 |
| YMR145C |        | 1.00 | -1.02 | 1.23  | -1.02 |
| YOL029C |        | 1.00 | -1.02 | 1.06  | -1.02 |
| YFL049W |        | 1.00 | -1.03 | 1.05  | -1.02 |
| YOR221C | MCT1   | 1.00 | -1.03 | -1.03 | -1.02 |
| YDR456W | NHX1   | 1.00 | -1.04 | 1.09  | -1.02 |
| YGR028W | MSP1   | 1.00 | -1.05 | -1.02 | -1.02 |
| YGR274C | TAF145 | 1.00 | -1.05 | -1.11 | -1.02 |
| YGL212W | VAM7   | 1.00 | -1.06 | -1.15 | -1.02 |



|         |        |      |       |       |       |
|---------|--------|------|-------|-------|-------|
| YMR126C |        | 1.00 | -1.06 | -1.02 | -1.02 |
| YOR318C |        | 1.00 | -1.06 | 1.00  | -1.02 |
| YPR111W | DBF20  | 1.00 | -1.06 | -1.11 | -1.02 |
| YHR017W | YSC83  | 1.00 | -1.07 | -1.05 | -1.02 |
| YLR230W |        | 1.00 | -1.07 | 1.03  | -1.02 |
| YLR226W | BUR2   | 1.00 | -1.08 | -1.25 | -1.02 |
| YPR105C | COD1   | 1.00 | -1.08 | -1.05 | -1.02 |
| YBR290W | BSD2   | 1.00 | -1.10 | -1.15 | -1.02 |
| YBR232C |        | 1.00 | -1.11 | 1.05  | -1.02 |
| YNL296W | KRE25  | 1.00 | -1.11 | 1.03  | -1.02 |
| YDL171C | GLT1   | 1.00 | -1.12 | -1.05 | -1.02 |
| YCR102C |        | 1.00 | -1.13 | -1.09 | -1.02 |
| YMR172W | HOT1   | 1.00 | -1.13 | -1.13 | -1.02 |
| YNL286W | CUS2   | 1.00 | -1.13 | -1.08 | -1.02 |
| YJL033W | HCA4   | 1.00 | -1.14 | 1.10  | -1.02 |
| YNL176C |        | 1.00 | -1.14 | -1.20 | -1.02 |
| YDR140W | FYV9   | 1.00 | -1.16 | -1.09 | -1.02 |
| YPR040W | SDF1   | 1.00 | -1.17 | 1.08  | -1.02 |
| YDL248W | COS7   | 1.00 | -1.18 | -1.12 | -1.02 |
| YIL137C |        | 1.00 | -1.18 | -1.02 | -1.02 |
| YLR030W |        | 1.00 | -1.18 | -1.03 | -1.02 |
| YML093W |        | 1.00 | -1.19 | -1.12 | -1.02 |
| YBL080C | PET112 | 1.00 | -1.21 | -1.22 | -1.02 |
| YDR492W |        | 1.00 | -1.21 | -1.10 | -1.02 |
| YKL179C |        | 1.00 | -1.22 | 1.08  | -1.02 |
| YNL243W | SLA2   | 1.00 | -1.22 | -1.15 | -1.02 |
| YOR037W | CYC2   | 1.00 | -1.22 | -1.02 | -1.02 |
| YDR132C |        | 1.00 | -1.23 | -1.02 | -1.02 |
| YER127W | LCP5   | 1.00 | -1.23 | -1.34 | -1.02 |
| YKL174C |        | 1.00 | -1.23 | -1.07 | -1.02 |
| YDR075W | PPH3   | 1.00 | -1.24 | -1.10 | -1.02 |
| YDR144C | MKC7   | 1.00 | -1.25 | -1.40 | -1.02 |
| YMR109W | MYO5   | 1.00 | -1.26 | -1.23 | -1.02 |
| YOR292C |        | 1.00 | -1.26 | -1.13 | -1.02 |
| YOL004W | SIN3   | 1.00 | -1.27 | -1.14 | -1.02 |
| YHR160C | PEX18  | 1.00 | -1.28 | -1.28 | -1.02 |
| YBL076C | ILS1   | 1.00 | -1.29 | -1.14 | -1.02 |
| YER092W | IES5   | 1.00 | -1.30 | -1.23 | -1.02 |
| YJL054W | TIM54  | 1.00 | -1.35 | -1.32 | -1.02 |
| YCL047C |        | 1.00 | -1.38 | 1.06  | -1.02 |
| YBR283C | SSH1   | 1.00 | -1.39 | -1.28 | -1.02 |
| YJL128C | PBS2   | 1.00 | -1.39 | -1.10 | -1.02 |
| YGL140C |        | 1.00 | -1.42 | -1.16 | -1.02 |
| YER089C | PTC2   | 1.00 | -1.44 | -1.14 | -1.02 |
| YJR052W | RAD7   | 1.00 | -1.45 | 1.10  | -1.02 |
| YLR402W |        | 1.00 | -1.45 | -1.08 | -1.02 |
| YFR024C |        | 1.00 | -1.46 | -1.14 | -1.02 |
| YPL041C |        | 1.00 | -1.57 | -1.09 | -1.02 |
| YJR089W | BIR1   | 1.00 | -1.60 | -1.04 | -1.02 |
| YDR254W | CHL4   | 1.00 | -1.62 | -1.05 | -1.02 |
| YBL111C |        | 1.00 | -1.84 | -1.15 | -1.02 |
| YHR139C | SPS100 | 1.00 | -1.92 | -1.30 | -1.02 |
| YMR031C |        | 1.00 | 1.50  | 1.46  | -1.03 |
| YNL241C | ZWF1   | 1.00 | 1.50  | 1.64  | -1.03 |
| YDL134C | PPH21  | 1.00 | 1.28  | 1.24  | -1.03 |
| YGL208W | SIP2   | 1.00 | 1.27  | 1.13  | -1.03 |
| YAL034C | FUN19  | 1.00 | 1.26  | 1.25  | -1.03 |
| YHR016C | YSC84  | 1.00 | 1.26  | 1.07  | -1.03 |
| YBR111C | YSA1   | 1.00 | 1.17  | 1.44  | -1.03 |
| YPL141C |        | 1.00 | 1.17  | 1.35  | -1.03 |
| YBL089W |        | 1.00 | 1.16  | 1.20  | -1.03 |

|         |       |      |       |       |       |
|---------|-------|------|-------|-------|-------|
| YKL043W | PHD1  | 1.00 | 1.16  | -1.03 | -1.03 |
| YBR251W | MRPS5 | 1.00 | 1.14  | 1.12  | -1.03 |
| YLL038C | ENT4  | 1.00 | 1.12  | 1.05  | -1.03 |
| YLR093C | NYV1  | 1.00 | 1.12  | 1.06  | -1.03 |
| YGR152C | RSR1  | 1.00 | 1.09  | 1.05  | -1.03 |
| YOR036W | PEP12 | 1.00 | 1.09  | 1.26  | -1.03 |
| YBR182C | SMP1  | 1.00 | 1.07  | -1.02 | -1.03 |
| YGL072C |       | 1.00 | 1.06  | 1.02  | -1.03 |
| YDL219W |       | 1.00 | 1.05  | -1.01 | -1.03 |
| YGL192W | IME4  | 1.00 | 1.05  | 1.22  | -1.03 |
| YBL071C |       | 1.00 | 1.04  | -1.01 | -1.03 |
| YCR089W | FIG2  | 1.00 | 1.04  | 1.02  | -1.03 |
| YBL059W |       | 1.00 | 1.03  | 1.03  | -1.03 |
| YNL210W | MER1  | 1.00 | 1.03  | -1.06 | -1.03 |
| YFR054C |       | 1.00 | 1.02  | -1.33 | -1.03 |
| YGR171C | MSM1  | 1.00 | 1.02  | -1.04 | -1.03 |
| YPL210C | SRP72 | 1.00 | 1.02  | 1.06  | -1.03 |
| YDR517W | GRH1  | 1.00 | -1.01 | 1.31  | -1.03 |
| YLR361C |       | 1.00 | -1.02 | 1.33  | -1.03 |
| YNL032W | SIW14 | 1.00 | -1.02 | 1.03  | -1.03 |
| YGL045W |       | 1.00 | -1.03 | 1.02  | -1.03 |
| YML069W | POB3  | 1.00 | -1.03 | 1.14  | -1.03 |
| YMR094W | CTF13 | 1.00 | -1.03 | -1.16 | -1.03 |
| YDL247W |       | 1.00 | -1.04 | 1.05  | -1.03 |
| YBR138C | HDR1  | 1.00 | -1.05 | -1.10 | -1.03 |
| YIR017C | MET28 | 1.00 | -1.07 | -1.08 | -1.03 |
| YAR042W | SWH1  | 1.00 | -1.08 | -1.07 | -1.03 |
| YMR245W |       | 1.00 | -1.08 | -1.01 | -1.03 |
| YHL036W | MUP3  | 1.00 | -1.11 | 1.28  | -1.03 |
| YBR225W |       | 1.00 | -1.12 | -1.35 | -1.03 |
| YJR116W |       | 1.00 | -1.13 | -1.15 | -1.03 |
| YGR129W | SYF2  | 1.00 | -1.14 | -1.26 | -1.03 |
| YCL004W | PGS1  | 1.00 | -1.15 | -1.10 | -1.03 |
| YDR423C | CAD1  | 1.00 | -1.15 | 1.13  | -1.03 |
| YHR190W | ERG9  | 1.00 | -1.15 | -1.02 | -1.03 |
| YIL090W |       | 1.00 | -1.15 | -1.17 | -1.03 |
| YJR131W | MNS1  | 1.00 | -1.15 | -1.06 | -1.03 |
| YGR203W |       | 1.00 | -1.16 | 1.03  | -1.03 |
| YBR170C | NPL4  | 1.00 | -1.17 | -1.22 | -1.03 |
| YGR064W |       | 1.00 | -1.17 | -1.13 | -1.03 |
| YMR236W | TAF17 | 1.00 | -1.17 | -1.04 | -1.03 |
| YKL017C | HCS1  | 1.00 | -1.20 | -1.12 | -1.03 |
| YOL002C |       | 1.00 | -1.21 | -1.07 | -1.03 |
| YOL090W | MSH2  | 1.00 | -1.22 | -1.21 | -1.03 |
| YGR041W | BUD9  | 1.00 | -1.23 | -1.23 | -1.03 |
| YML021C | UNG1  | 1.00 | -1.24 | -1.21 | -1.03 |
| YLR111W |       | 1.00 | -1.25 | 1.00  | -1.03 |
| YBR278W | DPB3  | 1.00 | -1.28 | -1.24 | -1.03 |
| YPR154W | PIN3  | 1.00 | -1.28 | -1.04 | -1.03 |
| YPL197C |       | 1.00 | -1.29 | 1.19  | -1.03 |
| YGL020C |       | 1.00 | -1.33 | -1.14 | -1.03 |
| YHR185C | PFS1  | 1.00 | -1.34 | -1.12 | -1.03 |
| YNL049C | SFB2  | 1.00 | -1.34 | -1.06 | -1.03 |
| YGL186C |       | 1.00 | -1.42 | -1.18 | -1.03 |
| YDL225W | SHS1  | 1.00 | -1.45 | 1.00  | -1.03 |
| YPL025C |       | 1.00 | -1.45 | -1.14 | -1.03 |
| YOR301W | RAX1  | 1.00 | -1.47 | -1.21 | -1.03 |
| YNR019W | ARE2  | 1.00 | -1.49 | -1.23 | -1.03 |
| YGR217W | CCH1  | 1.00 | -1.51 | -1.32 | -1.03 |
| YPL183C |       | 1.00 | -1.53 | -1.38 | -1.03 |
| YLR082C | SRL2  | 1.00 | -1.54 | -1.29 | -1.03 |

|         |       |      |       |       |       |
|---------|-------|------|-------|-------|-------|
| YPR170C |       | 1.00 | -1.73 | -1.18 | -1.03 |
| YGR001C |       | 1.00 | -1.94 | -1.19 | -1.03 |
| YPL275W |       | 1.00 | 1.34  | -1.13 | -1.04 |
| YNL205C |       | 1.00 | 1.33  | -1.03 | -1.04 |
| YNL202W | SPS19 | 1.00 | 1.24  | 1.16  | -1.04 |
| YEL041W |       | 1.00 | 1.21  | -1.04 | -1.04 |
| YGR231C | PHB2  | 1.00 | 1.21  | 1.12  | -1.04 |
| YBR086C | IST2  | 1.00 | 1.19  | 1.03  | -1.04 |
| YDR082W | STN1  | 1.00 | 1.19  | 1.05  | -1.04 |
| YIL138C | TPM2  | 1.00 | 1.19  | 1.27  | -1.04 |
| YIL080W |       | 1.00 | 1.16  | 1.14  | -1.04 |
| YBR289W | SNF5  | 1.00 | 1.14  | 1.16  | -1.04 |
| YGR046W |       | 1.00 | 1.13  | 1.10  | -1.04 |
| YIR043C |       | 1.00 | 1.07  | 1.20  | -1.04 |
| YGR050C |       | 1.00 | 1.06  | -1.19 | -1.04 |
| YCR042C | TSM1  | 1.00 | 1.04  | 1.06  | -1.04 |
| YPL087W | YDC1  | 1.00 | 1.04  | 1.09  | -1.04 |
| YBR080C | SEC18 | 1.00 | 1.03  | 1.04  | -1.04 |
| YDL206W |       | 1.00 | 1.03  | -1.07 | -1.04 |
| YDR259C | YAP6  | 1.00 | 1.03  | 1.12  | -1.04 |
| YOR148C | SPP2  | 1.00 | 1.03  | 1.09  | -1.04 |
| YLL054C |       | 1.00 | 1.02  | -1.27 | -1.04 |
| YIL050W | PCL7  | 1.00 | 1.01  | 1.16  | -1.04 |
| YJL209W | CBP1  | 1.00 | -1.02 | -1.07 | -1.04 |
| YLR028C | ADE16 | 1.00 | -1.02 | 1.03  | -1.04 |
| YGR196C | FYV8  | 1.00 | -1.03 | -1.09 | -1.04 |
| YNR057C | BIO4  | 1.00 | -1.03 | 1.03  | -1.04 |
| YCL046W |       | 1.00 | -1.04 | -1.07 | -1.04 |
| YHL010C |       | 1.00 | -1.04 | -1.05 | -1.04 |
| YOR368W | RAD17 | 1.00 | -1.04 | -1.08 | -1.04 |
| YEL017W |       | 1.00 | -1.05 | 1.09  | -1.04 |
| YNL328C | MDJ2  | 1.00 | -1.05 | -1.01 | -1.04 |
| YNR058W | BIO3  | 1.00 | -1.06 | -1.20 | -1.04 |
| YOR313C | SPS4  | 1.00 | -1.06 | -1.15 | -1.04 |
| YHL037C |       | 1.00 | -1.07 | 1.25  | -1.04 |
| YLR337C | VRP1  | 1.00 | -1.09 | -1.08 | -1.04 |
| YGR140W | CBF2  | 1.00 | -1.10 | -1.24 | -1.04 |
| YLL030C |       | 1.00 | -1.11 | -1.15 | -1.04 |
| YOL124C |       | 1.00 | -1.11 | -1.10 | -1.04 |
| YDR486C | VPS60 | 1.00 | -1.12 | -1.15 | -1.04 |
| YHR015W | MIP6  | 1.00 | -1.12 | 1.00  | -1.04 |
| YJL187C | SWE1  | 1.00 | -1.12 | -1.07 | -1.04 |
| YNL254C |       | 1.00 | -1.12 | -1.02 | -1.04 |
| YMR035W | IMP2  | 1.00 | -1.13 | -1.07 | -1.04 |
| YMR137C | PSO2  | 1.00 | -1.13 | -1.14 | -1.04 |
| YJL027C |       | 1.00 | -1.14 | 1.04  | -1.04 |
| YJL167W | ERG20 | 1.00 | -1.14 | 1.00  | -1.04 |
| YBL075C | SSA3  | 1.00 | -1.15 | -1.09 | -1.04 |
| YNL016W | PUB1  | 1.00 | -1.15 | -1.14 | -1.04 |
| YDR303C | RSC3  | 1.00 | -1.16 | 1.02  | -1.04 |
| YIL165C |       | 1.00 | -1.16 | -1.03 | -1.04 |
| YJR140C | HIR3  | 1.00 | -1.17 | -1.08 | -1.04 |
| YLR187W |       | 1.00 | -1.17 | -1.46 | -1.04 |
| YGR024C |       | 1.00 | -1.18 | 1.01  | -1.04 |
| YNL059C | ARP5  | 1.00 | -1.18 | 1.14  | -1.04 |
| YPL096W | PNG1  | 1.00 | -1.18 | -1.07 | -1.04 |
| YJR088C |       | 1.00 | -1.19 | -1.04 | -1.04 |
| YCR090C |       | 1.00 | -1.20 | -1.16 | -1.04 |
| YHR050W | SMF2  | 1.00 | -1.20 | 1.03  | -1.04 |
| YNL212W | VID27 | 1.00 | -1.20 | -1.01 | -1.04 |
| YDR270W | CCC2  | 1.00 | -1.21 | -1.08 | -1.04 |

|         |       |      |       |       |       |
|---------|-------|------|-------|-------|-------|
| YDL175C |       | 1.00 | -1.25 | -1.19 | -1.04 |
| YDR073W | SNF11 | 1.00 | -1.26 | -1.10 | -1.04 |
| YGR251W |       | 1.00 | -1.26 | -1.40 | -1.04 |
| YOR280C |       | 1.00 | -1.26 | -1.17 | -1.04 |
| YLL021W | SPA2  | 1.00 | -1.27 | -1.07 | -1.04 |
| YPL155C | KIP2  | 1.00 | -1.35 | 1.06  | -1.04 |
| YGL144C |       | 1.00 | -1.36 | -1.44 | -1.04 |
| YOR018W | ROD1  | 1.00 | -1.36 | -1.13 | -1.04 |
| YML014W |       | 1.00 | -1.38 | -1.60 | -1.04 |
| YER098W | UBP9  | 1.00 | -1.40 | -1.31 | -1.04 |
| YPL175W | SPT14 | 1.00 | -1.49 | -1.35 | -1.04 |
| YLR199C |       | 1.00 | -1.50 | -1.23 | -1.04 |
| YPL021W | ECM23 | 1.00 | -1.50 | -1.26 | -1.04 |
| YDR294C | DPL1  | 1.00 | -1.54 | -1.31 | -1.04 |
| YJR148W | BAT2  | 1.00 | -1.70 | -1.01 | -1.04 |
| YKL207W |       | 1.00 | -1.75 | -1.01 | -1.04 |
| YMR263W | SAP30 | 1.00 | 2.21  | 1.41  | -1.05 |
| YAL060W | BDH1  | 1.00 | 1.70  | 1.54  | -1.05 |
| YFR045W |       | 1.00 | 1.15  | 1.00  | -1.05 |
| YOR367W | SCP1  | 1.00 | 1.15  | 1.07  | -1.05 |
| YGR172C | YIP1  | 1.00 | 1.14  | 1.02  | -1.05 |
| YNL126W | SPC98 | 1.00 | 1.14  | 1.08  | -1.05 |
| YBL108W |       | 1.00 | 1.12  | -1.10 | -1.05 |
| YDR467C |       | 1.00 | 1.10  | 1.07  | -1.05 |
| YDL045C | FAD1  | 1.00 | 1.07  | -1.06 | -1.05 |
| YHR067W |       | 1.00 | 1.07  | 1.00  | -1.05 |
| YBL096C |       | 1.00 | 1.06  | -1.10 | -1.05 |
| YNL235C |       | 1.00 | 1.06  | -1.03 | -1.05 |
| YKL146W |       | 1.00 | 1.05  | 1.19  | -1.05 |
| YMR041C |       | 1.00 | 1.05  | -1.02 | -1.05 |
| YOL149W | DCP1  | 1.00 | 1.05  | -1.02 | -1.05 |
| YJL046W |       | 1.00 | 1.03  | -1.05 | -1.05 |
| YML019W | OST6  | 1.00 | 1.03  | 1.10  | -1.05 |
| YNL314W | DAL82 | 1.00 | 1.03  | 1.07  | -1.05 |
| YGL261C |       | 1.00 | 1.02  | -1.15 | -1.05 |
| YGR096W |       | 1.00 | 1.02  | -1.02 | -1.05 |
| YAR020C | PAU7  | 1.00 | 1.00  | -1.01 | -1.05 |
| YCL061C | MRC1  | 1.00 | 1.00  | 1.06  | -1.05 |
| YER174C | GRX4  | 1.00 | 1.00  | 1.41  | -1.05 |
| YGR071C |       | 1.00 | 1.00  | -1.21 | -1.05 |
| YLR164W |       | 1.00 | -1.01 | -1.05 | -1.05 |
| YDR185C |       | 1.00 | -1.02 | 1.00  | -1.05 |
| YIR013C | GAT4  | 1.00 | -1.02 | -1.11 | -1.05 |
| YGL082W |       | 1.00 | -1.03 | 1.10  | -1.05 |
| YJR139C | HOM6  | 1.00 | -1.03 | 1.02  | -1.05 |
| YNR020C |       | 1.00 | -1.03 | -1.11 | -1.05 |
| YPR019W | CDC54 | 1.00 | -1.03 | -1.09 | -1.05 |
| YCR065W | HCM1  | 1.00 | -1.05 | -1.36 | -1.05 |
| YJL009W |       | 1.00 | -1.05 | 1.02  | -1.05 |
| YJL032W |       | 1.00 | -1.05 | -1.03 | -1.05 |
| YMR012W | CLU1  | 1.00 | -1.07 | 1.08  | -1.05 |
| YKL063C |       | 1.00 | -1.08 | -1.13 | -1.05 |
| YBR213W | MET8  | 1.00 | -1.09 | 1.02  | -1.05 |
| YHR011W | DIA4  | 1.00 | -1.09 | -1.09 | -1.05 |
| YGR221C | TOS2  | 1.00 | -1.10 | 1.01  | -1.05 |
| YBR008C | FLR1  | 1.00 | -1.11 | -1.10 | -1.05 |
| YIL082W |       | 1.00 | -1.13 | -1.11 | -1.05 |
| YLR115W | CFT2  | 1.00 | -1.13 | -1.19 | -1.05 |
| YBR057C | MUM2  | 1.00 | -1.14 | -1.15 | -1.05 |
| YGL128C |       | 1.00 | -1.14 | -1.19 | -1.05 |
| YFR005C | SAD1  | 1.00 | -1.15 | -1.08 | -1.05 |

|         |       |      |       |       |       |
|---------|-------|------|-------|-------|-------|
| YJL077C | ICS3  | 1.00 | -1.15 | -1.06 | -1.05 |
| YKL186C | MTR2  | 1.00 | -1.15 | -1.19 | -1.05 |
| YBR188C | NTC20 | 1.00 | -1.16 | -1.10 | -1.05 |
| YGL074C |       | 1.00 | -1.18 | -1.04 | -1.05 |
| YHR134W | WSS1  | 1.00 | -1.18 | 1.00  | -1.05 |
| YDR206W | EBS1  | 1.00 | -1.19 | -1.16 | -1.05 |
| YDR275W |       | 1.00 | -1.19 | -1.15 | -1.05 |
| YKR078W |       | 1.00 | -1.19 | 1.01  | -1.05 |
| YIR009W | MSL1  | 1.00 | -1.21 | -1.09 | -1.05 |
| YLR216C | CPR6  | 1.00 | -1.21 | 1.10  | -1.05 |
| YDL161W | ENT1  | 1.00 | -1.22 | 1.05  | -1.05 |
| YPR091C |       | 1.00 | -1.23 | 1.08  | -1.05 |
| YBR246W |       | 1.00 | -1.24 | -1.16 | -1.05 |
| YHR214W |       | 1.00 | -1.27 | 1.18  | -1.05 |
| YDR026C |       | 1.00 | -1.28 | -1.25 | -1.05 |
| YER076C |       | 1.00 | -1.28 | -1.17 | -1.05 |
| YIR040C |       | 1.00 | -1.33 | -1.13 | -1.05 |
| YCL022C |       | 1.00 | -1.36 | -1.15 | -1.05 |
| YEL032W | MCM3  | 1.00 | -1.39 | -1.32 | -1.05 |
| YDL177C |       | 1.00 | -1.44 | -1.36 | -1.05 |
| YJR071W |       | 1.00 | -1.44 | -1.08 | -1.05 |
| YFL004W | VTC2  | 1.00 | -1.45 | -1.08 | -1.05 |
| YNL262W | POL2  | 1.00 | -1.45 | 1.08  | -1.05 |
| YOR004W |       | 1.00 | -1.71 | -1.35 | -1.05 |
| YGL193C |       | 1.00 | -1.91 | -1.31 | -1.05 |
| YCR006C |       | 1.00 | 1.33  | 1.11  | -1.06 |
| YLR066W | SPC3  | 1.00 | 1.33  | 1.08  | -1.06 |
| YLR043C | TRX1  | 1.00 | 1.30  | 1.10  | -1.06 |
| YDL064W | UBC9  | 1.00 | 1.28  | 1.20  | -1.06 |
| YDL027C |       | 1.00 | 1.26  | 1.09  | -1.06 |
| YKL065C | YET1  | 1.00 | 1.26  | 1.25  | -1.06 |
| YBR295W | PCA1  | 1.00 | 1.15  | 1.13  | -1.06 |
| YGR105W | VMA21 | 1.00 | 1.12  | -1.12 | -1.06 |
| YBR035C | PDX3  | 1.00 | 1.10  | -1.10 | -1.06 |
| YJL217W |       | 1.00 | 1.08  | 1.18  | -1.06 |
| YOR357C | GRD19 | 1.00 | 1.08  | -1.14 | -1.06 |
| YBR277C |       | 1.00 | 1.05  | 1.03  | -1.06 |
| YGL115W | SNF4  | 1.00 | 1.05  | -1.07 | -1.06 |
| YBL056W | PTC3  | 1.00 | 1.01  | -1.03 | -1.06 |
| YBR194W |       | 1.00 | 1.01  | -1.13 | -1.06 |
| YGR122W |       | 1.00 | 1.01  | 1.03  | -1.06 |
| YMR104C | YPK2  | 1.00 | 1.01  | 1.27  | -1.06 |
| YGR170W | PSD2  | 1.00 | 1.00  | 1.00  | -1.06 |
| YOR286W |       | 1.00 | 1.00  | -1.07 | -1.06 |
| YHR176W |       | 1.00 | -1.01 | -1.22 | -1.06 |
| YJL006C | CTK2  | 1.00 | -1.01 | -1.15 | -1.06 |
| YJR084W |       | 1.00 | -1.01 | -1.09 | -1.06 |
| YNL299W | TRF5  | 1.00 | -1.01 | -1.18 | -1.06 |
| YDL185W | TFP1  | 1.00 | -1.02 | 1.08  | -1.06 |
| YNL288W | CAF40 | 1.00 | -1.02 | -1.13 | -1.06 |
| YOR129C |       | 1.00 | -1.02 | -1.03 | -1.06 |
| YCL058C | FYV5  | 1.00 | -1.03 | -1.25 | -1.06 |
| YHR151C |       | 1.00 | -1.03 | -1.15 | -1.06 |
| YOR244W | ESA1  | 1.00 | -1.04 | 1.09  | -1.06 |
| YJR062C | NTA1  | 1.00 | -1.06 | -1.02 | -1.06 |
| YNR010W | CSE2  | 1.00 | -1.06 | -1.02 | -1.06 |
| YBR150C | TBS1  | 1.00 | -1.07 | -1.08 | -1.06 |
| YDL235C | YPD1  | 1.00 | -1.07 | -1.11 | -1.06 |
| YML032C | RAD52 | 1.00 | -1.07 | -1.15 | -1.06 |
| YDL157C |       | 1.00 | -1.08 | -1.16 | -1.06 |
| YHR166C | CDC23 | 1.00 | -1.08 | 1.13  | -1.06 |



|         |         |      |       |       |       |
|---------|---------|------|-------|-------|-------|
| YJL038C |         | 1.00 | -1.08 | -1.09 | -1.06 |
| YPL280W |         | 1.00 | -1.09 | -1.12 | -1.06 |
| YGR233C | PHO81   | 1.00 | -1.10 | 1.14  | -1.06 |
| YKL028W | TFA1    | 1.00 | -1.10 | -1.12 | -1.06 |
| YCL039W |         | 1.00 | -1.11 | -1.26 | -1.06 |
| YDR094W |         | 1.00 | -1.11 | 1.10  | -1.06 |
| YGL221C | NIF3    | 1.00 | -1.11 | -1.04 | -1.06 |
| YDR249C |         | 1.00 | -1.12 | -1.07 | -1.06 |
| YLR387C |         | 1.00 | -1.13 | -1.05 | -1.06 |
| YDR251W | PAM1    | 1.00 | -1.14 | -1.12 | -1.06 |
| YGR154C |         | 1.00 | -1.14 | -1.03 | -1.06 |
| YOR289W |         | 1.00 | -1.14 | -1.14 | -1.06 |
| YPL032C | SVL3    | 1.00 | -1.14 | 1.01  | -1.06 |
| YPL269W | KAR9    | 1.00 | -1.14 | -1.12 | -1.06 |
| YGL039W |         | 1.00 | -1.15 | -1.22 | -1.06 |
| YGL126W | SCS3    | 1.00 | -1.15 | -1.16 | -1.06 |
| YBR193C | MED8    | 1.00 | -1.16 | -1.42 | -1.06 |
| YKR056W | RNC1    | 1.00 | -1.16 | -1.16 | -1.06 |
| YDR307W |         | 1.00 | -1.17 | -1.02 | -1.06 |
| YOR005C | DNL4    | 1.00 | -1.17 | -1.02 | -1.06 |
| YLR420W | URA4    | 1.00 | -1.18 | -1.13 | -1.06 |
| YNL185C | MRPL19  | 1.00 | -1.20 | 1.01  | -1.06 |
| YKL125W | RRN3    | 1.00 | -1.21 | -1.10 | -1.06 |
| YOR039W | CKB2    | 1.00 | -1.22 | -1.15 | -1.06 |
| YER188W |         | 1.00 | -1.23 | -1.19 | -1.06 |
| YER008C | SEC3    | 1.00 | -1.25 | -1.14 | -1.06 |
| YDR061W |         | 1.00 | -1.26 | -1.24 | -1.06 |
| YPL038W | MET31   | 1.00 | -1.26 | -1.01 | -1.06 |
| YBR044C | TCM62   | 1.00 | -1.28 | 1.01  | -1.06 |
| YDR537C |         | 1.00 | -1.28 | -1.24 | -1.06 |
| YEL021W | URA3    | 1.00 | -1.30 | -1.36 | -1.06 |
| YDL189W |         | 1.00 | -1.31 | -1.05 | -1.06 |
| YDL245C | HXT15   | 1.00 | -1.34 | 1.00  | -1.06 |
| YJL056C | ZAP1    | 1.00 | -1.34 | -1.42 | -1.06 |
| YPL085W | SEC16   | 1.00 | -1.37 | -1.18 | -1.06 |
| YJL204C |         | 1.00 | -1.39 | -1.09 | -1.06 |
| YMR078C | CTF18   | 1.00 | -1.40 | -1.04 | -1.06 |
| YMR210W |         | 1.00 | -1.43 | -1.06 | -1.06 |
| YER107C | GLE2    | 1.00 | -1.50 | -1.23 | -1.06 |
| YHR111W |         | 1.00 | -1.62 | -1.31 | -1.06 |
| YLR135W | SLX4    | 1.00 | -1.67 | -1.39 | -1.06 |
| YLR035C | MLH2    | 1.00 | -1.69 | -1.27 | -1.06 |
| YBL004W |         | 1.00 | -1.71 | -1.61 | -1.06 |
| YGL049C | TIF4632 | 1.00 | 1.68  | 1.85  | -1.07 |
| YER154W | OXA1    | 1.00 | 1.54  | 1.65  | -1.07 |
| YHR043C | DOG2    | 1.00 | 1.34  | 1.38  | -1.07 |
| YGL106W | MLC1    | 1.00 | 1.17  | 1.12  | -1.07 |
| YMR297W | PRC1    | 1.00 | 1.15  | 1.27  | -1.07 |
| YNR009W |         | 1.00 | 1.13  | -1.08 | -1.07 |
| YMR029C |         | 1.00 | 1.12  | 1.19  | -1.07 |
| YFL053W | DAK2    | 1.00 | 1.11  | 1.03  | -1.07 |
| YDR074W | TPS2    | 1.00 | 1.09  | -1.06 | -1.07 |
| YOL043C | NTG2    | 1.00 | 1.08  | 1.11  | -1.07 |
| YMR063W | RIM9    | 1.00 | 1.07  | -1.16 | -1.07 |
| YDR379W | RGA2    | 1.00 | 1.05  | -1.13 | -1.07 |
| YEL024W | RIP1    | 1.00 | 1.05  | 1.17  | -1.07 |
| YBL042C | FUI1    | 1.00 | 1.04  | -1.16 | -1.07 |
| YDR514C |         | 1.00 | 1.04  | -1.14 | -1.07 |
| YLR414C |         | 1.00 | 1.04  | 1.16  | -1.07 |
| YBR129C | OPY1    | 1.00 | 1.02  | -1.06 | -1.07 |
| YGR153W | TOS10   | 1.00 | 1.02  | -1.05 | -1.07 |

|         |       |      |       |       |       |
|---------|-------|------|-------|-------|-------|
| YKL075C |       | 1.00 | 1.02  | 1.05  | -1.07 |
| YML068W |       | 1.00 | 1.02  | 1.10  | -1.07 |
| YGL046W |       | 1.00 | 1.01  | 1.09  | -1.07 |
| YJR119C |       | 1.00 | 1.01  | -1.10 | -1.07 |
| YNR041C | COQ2  | 1.00 | 1.01  | -1.14 | -1.07 |
| YJL106W | IME2  | 1.00 | 1.00  | -1.17 | -1.07 |
| YGR207C |       | 1.00 | -1.03 | 1.12  | -1.07 |
| YPR015C |       | 1.00 | -1.03 | -1.01 | -1.07 |
| YIR028W | DAL4  | 1.00 | -1.04 | -1.04 | -1.07 |
| YKL053W |       | 1.00 | -1.04 | -1.13 | -1.07 |
| YPL257W |       | 1.00 | -1.04 | 1.05  | -1.07 |
| YHR028C | DAP2  | 1.00 | -1.05 | -1.05 | -1.07 |
| YMR150C | IMP1  | 1.00 | -1.06 | -1.13 | -1.07 |
| YPR038W |       | 1.00 | -1.07 | 1.00  | -1.07 |
| YFL034W |       | 1.00 | -1.08 | 1.16  | -1.07 |
| YGR026W |       | 1.00 | -1.08 | 1.07  | -1.07 |
| YHR052W |       | 1.00 | -1.08 | -1.13 | -1.07 |
| YOR144C | EFD1  | 1.00 | -1.08 | -1.10 | -1.07 |
| YGL014W | PUF4  | 1.00 | -1.09 | -1.25 | -1.07 |
| YIL072W | HOP1  | 1.00 | -1.10 | -1.15 | -1.07 |
| YNL248C | RPA49 | 1.00 | -1.10 | -1.05 | -1.07 |
| YDR191W | HST4  | 1.00 | -1.11 | -1.08 | -1.07 |
| YNL309W | STB1  | 1.00 | -1.11 | -1.21 | -1.07 |
| YBR066C | NRG2  | 1.00 | -1.12 | -1.25 | -1.07 |
| YCR105W |       | 1.00 | -1.12 | -1.10 | -1.07 |
| YDR181C | SAS4  | 1.00 | -1.12 | 1.09  | -1.07 |
| YER097W |       | 1.00 | -1.12 | 1.04  | -1.07 |
| YGR033C |       | 1.00 | -1.13 | -1.13 | -1.07 |
| YOL084W | PHM7  | 1.00 | -1.13 | 1.05  | -1.07 |
| YOR100C | CRC1  | 1.00 | -1.13 | -1.07 | -1.07 |
| YFR056C |       | 1.00 | -1.14 | -1.08 | -1.07 |
| YGR163W | GTR2  | 1.00 | -1.14 | -1.10 | -1.07 |
| YJL053W | PEP8  | 1.00 | -1.15 | -1.10 | -1.07 |
| YNR011C | PRP2  | 1.00 | -1.16 | -1.20 | -1.07 |
| YBR285W |       | 1.00 | -1.18 | -1.21 | -1.07 |
| YHR156C |       | 1.00 | -1.18 | 1.03  | -1.07 |
| YLR126C |       | 1.00 | -1.20 | -1.15 | -1.07 |
| YNL170W |       | 1.00 | -1.20 | 1.14  | -1.07 |
| YNL236W | SIN4  | 1.00 | -1.20 | -1.20 | -1.07 |
| YDR199W |       | 1.00 | -1.21 | -1.14 | -1.07 |
| YNL247W |       | 1.00 | -1.22 | -1.11 | -1.07 |
| YER172C | BRR2  | 1.00 | -1.24 | -1.18 | -1.07 |
| YOR334W | MRS2  | 1.00 | -1.24 | -1.26 | -1.07 |
| YPR133C | IWS1  | 1.00 | -1.24 | -1.12 | -1.07 |
| YJL086C |       | 1.00 | -1.25 | -1.11 | -1.07 |
| YGL005C | COD5  | 1.00 | -1.28 | -1.12 | -1.07 |
| YGR133W | PEX4  | 1.00 | -1.31 | -1.27 | -1.07 |
| YLR071C | RGR1  | 1.00 | -1.31 | -1.16 | -1.07 |
| YDR159W | SAC3  | 1.00 | -1.35 | -1.35 | -1.07 |
| YEL063C | CAN1  | 1.00 | -1.35 | -1.17 | -1.07 |
| YGL086W | MAD1  | 1.00 | -1.36 | -1.17 | -1.07 |
| YOR114W |       | 1.00 | -1.36 | -1.19 | -1.07 |
| YJR059W | PTK2  | 1.00 | -1.39 | -1.15 | -1.07 |
| YDR228C | PCF11 | 1.00 | -1.41 | -1.14 | -1.07 |
| YDR302W | GPI11 | 1.00 | -1.45 | -1.02 | -1.07 |
| YLR143W |       | 1.00 | -1.48 | -1.38 | -1.07 |
| YGL217C |       | 1.00 | -1.50 | -1.15 | -1.07 |
| YJR017C | ESS1  | 1.00 | -1.50 | -1.09 | -1.07 |
| YEL036C | ANP1  | 1.00 | -1.51 | -1.01 | -1.07 |
| YLR266C |       | 1.00 | -1.55 | -1.26 | -1.07 |
| YOR143C | THI80 | 1.00 | -1.77 | -1.49 | -1.07 |

|         |        |      |       |       |       |
|---------|--------|------|-------|-------|-------|
| YGR225W | AMA1   | 1.00 | -2.35 | -1.55 | -1.07 |
| YKL099C |        | 1.00 | 1.38  | 1.08  | -1.08 |
| YPR028W | YIP2   | 1.00 | 1.29  | 1.39  | -1.08 |
| YDR532C | KRE28  | 1.00 | 1.23  | 1.07  | -1.08 |
| YBR122C | MRPL36 | 1.00 | 1.12  | -1.06 | -1.08 |
| YKR068C | BET3   | 1.00 | 1.11  | 1.02  | -1.08 |
| YMR232W | FUS2   | 1.00 | 1.10  | -1.01 | -1.08 |
| YDR007W | TRP1   | 1.00 | 1.09  | 1.03  | -1.08 |
| YBR014C |        | 1.00 | 1.06  | 1.00  | -1.08 |
| YMR151W | YIM2   | 1.00 | 1.06  | -1.19 | -1.08 |
| YDL090C | RAM1   | 1.00 | -1.01 | -1.04 | -1.08 |
| YDL092W | SRP14  | 1.00 | -1.01 | -1.03 | -1.08 |
| YDR278C |        | 1.00 | -1.01 | 1.01  | -1.08 |
| YER147C | SCC4   | 1.00 | -1.01 | -1.05 | -1.08 |
| YDR287W |        | 1.00 | -1.02 | -1.06 | -1.08 |
| YER116C | SLX8   | 1.00 | -1.02 | -1.03 | -1.08 |
| YMR224C | MRE11  | 1.00 | -1.02 | -1.15 | -1.08 |
| YNL312W | RFA2   | 1.00 | -1.02 | -1.07 | -1.08 |
| YPR054W | SMK1   | 1.00 | -1.02 | -1.09 | -1.08 |
| YCR007C |        | 1.00 | -1.03 | -1.05 | -1.08 |
| YDR460W | TFB3   | 1.00 | -1.04 | -1.02 | -1.08 |
| YDR542W |        | 1.00 | -1.04 | 1.09  | -1.08 |
| YIL096C |        | 1.00 | -1.04 | -1.28 | -1.08 |
| YNL231C | PDR16  | 1.00 | -1.04 | -1.05 | -1.08 |
| YPR116W |        | 1.00 | -1.04 | 1.04  | -1.08 |
| YMR234W | RNH1   | 1.00 | -1.05 | 1.06  | -1.08 |
| YPL073C |        | 1.00 | -1.05 | -1.14 | -1.08 |
| YBR058C | UBP14  | 1.00 | -1.07 | -1.06 | -1.08 |
| YMR095C | SNO1   | 1.00 | -1.07 | 1.13  | -1.08 |
| YKR017C |        | 1.00 | -1.08 | -1.19 | -1.08 |
| YOL054W |        | 1.00 | -1.09 | 1.00  | -1.08 |
| YBR173C | UMP1   | 1.00 | -1.10 | 1.07  | -1.08 |
| YER007W | PAC2   | 1.00 | -1.11 | -1.03 | -1.08 |
| YOR025W | HST3   | 1.00 | -1.11 | -1.06 | -1.08 |
| YGR093W |        | 1.00 | -1.12 | -1.06 | -1.08 |
| YIL105C |        | 1.00 | -1.12 | -1.06 | -1.08 |
| YNL334C | SNO2   | 1.00 | -1.12 | 1.08  | -1.08 |
| YDL026W |        | 1.00 | -1.13 | -1.21 | -1.08 |
| YDL180W |        | 1.00 | -1.13 | 1.02  | -1.08 |
| YGR009C | SEC9   | 1.00 | -1.15 | 1.00  | -1.08 |
| YNL293W | MSB3   | 1.00 | -1.16 | -1.10 | -1.08 |
| YPL144W |        | 1.00 | -1.16 | 1.02  | -1.08 |
| YHL013C |        | 1.00 | -1.17 | 1.17  | -1.08 |
| YIL147C | SLN1   | 1.00 | -1.17 | -1.20 | -1.08 |
| YLR031W |        | 1.00 | -1.17 | -1.05 | -1.08 |
| YOR386W | PHR1   | 1.00 | -1.17 | -1.02 | -1.08 |
| YGR200C | ELP2   | 1.00 | -1.18 | -1.14 | -1.08 |
| YHR120W | MSH1   | 1.00 | -1.18 | -1.17 | -1.08 |
| YOR003W | YSP3   | 1.00 | -1.18 | -1.19 | -1.08 |
| YKL187C |        | 1.00 | -1.19 | -1.11 | -1.08 |
| YLR124W |        | 1.00 | -1.21 | -1.09 | -1.08 |
| YDR141C | DOP1   | 1.00 | -1.22 | -1.19 | -1.08 |
| YGR134W | CAF130 | 1.00 | -1.22 | -1.38 | -1.08 |
| YLR421C | RPN13  | 1.00 | -1.24 | -1.01 | -1.08 |
| YJL087C | TRL1   | 1.00 | -1.25 | -1.17 | -1.08 |
| YHR088W | RPF1   | 1.00 | -1.26 | -1.16 | -1.08 |
| YGL214W |        | 1.00 | -1.27 | -1.25 | -1.08 |
| YIL024C |        | 1.00 | -1.28 | -1.05 | -1.08 |
| YIL171W | HXT12  | 1.00 | -1.28 | -1.24 | -1.08 |
| YER018C | SPC25  | 1.00 | -1.29 | -1.24 | -1.08 |
| YIL054W | FYV2   | 1.00 | -1.31 | -1.30 | -1.08 |

|         |        |      |       |       |       |
|---------|--------|------|-------|-------|-------|
| YJL127C | SPT10  | 1.00 | -1.31 | -1.14 | -1.08 |
| YOR006C |        | 1.00 | -1.35 | 1.02  | -1.08 |
| YOR094W | ARF3   | 1.00 | -1.40 | -1.30 | -1.08 |
| YGR067C |        | 1.00 | -1.45 | -1.19 | -1.08 |
| YMR017W | SPO20  | 1.00 | -1.46 | -1.07 | -1.08 |
| YDR531W |        | 1.00 | -1.48 | -1.25 | -1.08 |
| YDR041W | RSM10  | 1.00 | -1.49 | -1.07 | -1.08 |
| YEL019C | MMS21  | 1.00 | -1.50 | -1.24 | -1.08 |
| YLR094C | GIS3   | 1.00 | -1.52 | -1.28 | -1.08 |
| YLR123C |        | 1.00 | -1.53 | -1.07 | -1.08 |
| YLR278C |        | 1.00 | -1.62 | -1.39 | -1.08 |
| YDR119W |        | 1.00 | -1.63 | -1.17 | -1.08 |
| YNR048W |        | 1.00 | -1.78 | -1.76 | -1.08 |
| YPL283C | YRF1-7 | 1.00 | -1.81 | -1.11 | -1.08 |
| YLR118C |        | 1.00 | -2.15 | -1.31 | -1.08 |
| YPL230W | USV1   | 1.00 | 1.62  | 1.53  | -1.09 |
| YPR196W |        | 1.00 | 1.26  | 1.16  | -1.09 |
| YEL039C | CYC7   | 1.00 | 1.24  | 1.39  | -1.09 |
| YJL005W | CYR1   | 1.00 | 1.14  | -1.12 | -1.09 |
| YBL044W |        | 1.00 | 1.12  | -1.03 | -1.09 |
| YDR453C |        | 1.00 | 1.12  | 1.30  | -1.09 |
| YGL010W |        | 1.00 | 1.11  | -1.19 | -1.09 |
| YBR259W |        | 1.00 | 1.09  | -1.06 | -1.09 |
| YGR038W | ORM1   | 1.00 | 1.08  | 1.08  | -1.09 |
| YIL159W | BNR1   | 1.00 | 1.08  | -1.15 | -1.09 |
| YAL024C | LTE1   | 1.00 | 1.03  | -1.03 | -1.09 |
| YLR227C | ADY4   | 1.00 | 1.03  | -1.25 | -1.09 |
| YML062C | MFT1   | 1.00 | 1.02  | -1.09 | -1.09 |
| YPL140C | MKK2   | 1.00 | 1.02  | -1.03 | -1.09 |
| YHR177W |        | 1.00 | 1.01  | -1.15 | -1.09 |
| YJR068W | RFC2   | 1.00 | 1.01  | 1.07  | -1.09 |
| YPR146C |        | 1.00 | 1.01  | 1.03  | -1.09 |
| YDR180W | SCC2   | 1.00 | 1.00  | -1.03 | -1.09 |
| YIL073C | SPO22  | 1.00 | 1.00  | -1.13 | -1.09 |
| YBR016W |        | 1.00 | -1.01 | -1.04 | -1.09 |
| YNL224C |        | 1.00 | -1.02 | -1.18 | -1.09 |
| YPR117W |        | 1.00 | -1.02 | -1.14 | -1.09 |
| YPR126C |        | 1.00 | -1.02 | 1.01  | -1.09 |
| YDL114W |        | 1.00 | -1.04 | -1.02 | -1.09 |
| YJR128W |        | 1.00 | -1.04 | -1.17 | -1.09 |
| YLR189C | UGT51  | 1.00 | -1.05 | -1.11 | -1.09 |
| YKR106W |        | 1.00 | -1.06 | -1.02 | -1.09 |
| YLR042C |        | 1.00 | -1.06 | -1.09 | -1.09 |
| YOR077W | RTS2   | 1.00 | -1.06 | -1.10 | -1.09 |
| YBL007C | SLA1   | 1.00 | -1.07 | -1.18 | -1.09 |
| YJL103C |        | 1.00 | -1.07 | -1.03 | -1.09 |
| YMR103C |        | 1.00 | -1.07 | 1.00  | -1.09 |
| YOR170W |        | 1.00 | -1.07 | 1.01  | -1.09 |
| YOR174W | MED4   | 1.00 | -1.07 | -1.13 | -1.09 |
| YPL020C | ULP1   | 1.00 | -1.07 | -1.07 | -1.09 |
| YMR075W |        | 1.00 | -1.08 | -1.02 | -1.09 |
| YPL103C |        | 1.00 | -1.08 | -1.02 | -1.09 |
| YDR506C |        | 1.00 | -1.09 | 1.24  | -1.09 |
| YLR001C |        | 1.00 | -1.09 | -1.16 | -1.09 |
| YER051W |        | 1.00 | -1.10 | -1.23 | -1.09 |
| YGL060W |        | 1.00 | -1.10 | -1.13 | -1.09 |
| YBR102C | EXO84  | 1.00 | -1.12 | -1.03 | -1.09 |
| YGR059W | SPR3   | 1.00 | -1.12 | -1.13 | -1.09 |
| YNR050C | LYS9   | 1.00 | -1.12 | -1.16 | -1.09 |
| YDR116C |        | 1.00 | -1.14 | -1.19 | -1.09 |
| YDR189W | SLY1   | 1.00 | -1.14 | -1.06 | -1.09 |

|         |        |      |       |       |       |
|---------|--------|------|-------|-------|-------|
| YMR030W |        | 1.00 | -1.14 | 1.07  | -1.09 |
| YOL133W | HRT1   | 1.00 | -1.14 | -1.15 | -1.09 |
| YOR033C | EXO1   | 1.00 | -1.14 | -1.04 | -1.09 |
| YJL089W | SIP4   | 1.00 | -1.16 | -1.14 | -1.09 |
| YKL189W | HYM1   | 1.00 | -1.16 | -1.22 | -1.09 |
| YLR349W |        | 1.00 | -1.16 | -1.11 | -1.09 |
| YPL045W | VPS16  | 1.00 | -1.16 | -1.09 | -1.09 |
| YGL251C | HFM1   | 1.00 | -1.17 | -1.21 | -1.09 |
| YJR041C |        | 1.00 | -1.17 | -1.20 | -1.09 |
| YKL088W |        | 1.00 | -1.17 | -1.08 | -1.09 |
| YAL043C | PTA1   | 1.00 | -1.18 | -1.13 | -1.09 |
| YJL197W | UBP12  | 1.00 | -1.18 | -1.16 | -1.09 |
| YOL012C | HTZ1   | 1.00 | -1.18 | -1.21 | -1.09 |
| YBL008W | HIR1   | 1.00 | -1.19 | -1.14 | -1.09 |
| YDR080W | VPS41  | 1.00 | -1.20 | -1.14 | -1.09 |
| YNL092W |        | 1.00 | -1.20 | -1.12 | -1.09 |
| YCR073C | SSK22  | 1.00 | -1.21 | -1.24 | -1.09 |
| YDR305C | HNT2   | 1.00 | -1.21 | -1.35 | -1.09 |
| YNL108C |        | 1.00 | -1.21 | -1.37 | -1.09 |
| YKL031W |        | 1.00 | -1.22 | -1.27 | -1.09 |
| YGL024W |        | 1.00 | -1.23 | -1.13 | -1.09 |
| YPL174C | NIP100 | 1.00 | -1.23 | -1.13 | -1.09 |
| YEL028W |        | 1.00 | -1.27 | -1.35 | -1.09 |
| YIL164C | NIT1   | 1.00 | -1.29 | -1.21 | -1.09 |
| YBR180W | DTR1   | 1.00 | -1.30 | -1.43 | -1.09 |
| YOR066W |        | 1.00 | -1.31 | -1.25 | -1.09 |
| YIR032C | DAL3   | 1.00 | -1.32 | -1.27 | -1.09 |
| YDL116W | NUP84  | 1.00 | -1.38 | 1.10  | -1.09 |
| YDR364C | CDC40  | 1.00 | -1.44 | -1.18 | -1.09 |
| YLR318W | EST2   | 1.00 | -1.62 | -1.28 | -1.09 |
| YNL161W | CBK1   | 1.00 | -1.66 | -1.27 | -1.09 |
| YOR013W |        | 1.00 | -1.71 | -1.28 | -1.09 |
| YNL065W | AQR1   | 1.00 | -2.06 | -1.45 | -1.09 |
| YNL098C | RAS2   | 1.00 | 1.39  | 1.74  | -1.10 |
| YGL079W |        | 1.00 | 1.36  | -1.06 | -1.10 |
| YMR152W | YIM1   | 1.00 | 1.19  | 1.11  | -1.10 |
| YPL003W | ULA1   | 1.00 | 1.12  | -1.04 | -1.10 |
| YLR392C |        | 1.00 | 1.10  | 1.01  | -1.10 |
| YEL069C | HXT13  | 1.00 | 1.09  | 1.01  | -1.10 |
| YMR276W | DSK2   | 1.00 | 1.09  | 1.16  | -1.10 |
| YIL156W | UBP7   | 1.00 | 1.07  | -1.23 | -1.10 |
| YIL093C | RSM25  | 1.00 | 1.06  | -1.12 | -1.10 |
| YLR145W |        | 1.00 | 1.06  | -1.06 | -1.10 |
| YDR089W |        | 1.00 | 1.05  | -1.08 | -1.10 |
| YDR355C |        | 1.00 | 1.05  | -1.06 | -1.10 |
| YLR177W |        | 1.00 | 1.05  | 1.40  | -1.10 |
| YIR010W |        | 1.00 | 1.04  | 1.12  | -1.10 |
| YGL052W |        | 1.00 | 1.03  | -1.09 | -1.10 |
| YPL069C | BTS1   | 1.00 | 1.03  | -1.14 | -1.10 |
| YAL030W | SNC1   | 1.00 | 1.01  | 1.02  | -1.10 |
| YNR008W | LRO1   | 1.00 | 1.01  | -1.27 | -1.10 |
| YGL141W | HUL5   | 1.00 | 1.00  | -1.12 | -1.10 |
| YGR131W |        | 1.00 | 1.00  | -1.09 | -1.10 |
| YBR088C | POL30  | 1.00 | -1.02 | -1.13 | -1.10 |
| YKL091C |        | 1.00 | -1.02 | -1.09 | -1.10 |
| YDL129W |        | 1.00 | -1.03 | -1.15 | -1.10 |
| YLR449W | FPR4   | 1.00 | -1.03 | 1.11  | -1.10 |
| YKL005C |        | 1.00 | -1.04 | -1.22 | -1.10 |
| YNL317W | PFS2   | 1.00 | -1.04 | -1.08 | -1.10 |
| YLL025W |        | 1.00 | -1.05 | -1.10 | -1.10 |
| YOR076C | SKI7   | 1.00 | -1.06 | 1.03  | -1.10 |



|         |            |      |       |       |       |
|---------|------------|------|-------|-------|-------|
| YJL083W |            | 1.00 | -1.07 | -1.25 | -1.10 |
| YDR030C | RAD28      | 1.00 | -1.08 | -1.13 | -1.10 |
| YHR024C | MAS2       | 1.00 | -1.08 | -1.16 | -1.10 |
| YBR095C |            | 1.00 | -1.09 | 1.01  | -1.10 |
| YBL065W |            | 1.00 | -1.10 | -1.01 | -1.10 |
| YPL029W | SUV3       | 1.00 | -1.10 | -1.30 | -1.10 |
| YPR201W | ARR3       | 1.00 | -1.11 | -1.07 | -1.10 |
| YJR021C | REC107     | 1.00 | -1.12 | -1.17 | -1.10 |
| YPR194C | OPT2       | 1.00 | -1.12 | 1.05  | -1.10 |
| YAR060C |            | 1.00 | -1.13 | -1.03 | -1.10 |
| YKR008W | RSC4       | 1.00 | -1.13 | -1.16 | -1.10 |
| YAL001C | TFC3       | 1.00 | -1.15 | -1.20 | -1.10 |
| YDL159W | STE7       | 1.00 | -1.15 | 1.06  | -1.10 |
| YCR049C |            | 1.00 | -1.16 | -1.16 | -1.10 |
| YOR213C | SAS5       | 1.00 | -1.17 | -1.13 | -1.10 |
| YDL209C |            | 1.00 | -1.19 | -1.18 | -1.10 |
| YPL181W |            | 1.00 | -1.19 | -1.22 | -1.10 |
| YPR083W |            | 1.00 | -1.19 | 1.01  | -1.10 |
| YNR066C |            | 1.00 | -1.22 | -1.27 | -1.10 |
| YOL081W | IRA2       | 1.00 | -1.22 | -1.36 | -1.10 |
| YBR272C | HSM3       | 1.00 | -1.24 | -1.22 | -1.10 |
| YGL182C |            | 1.00 | -1.25 | -1.13 | -1.10 |
| YJL213W |            | 1.00 | -1.25 | -1.07 | -1.10 |
| YPL082C | MOT1       | 1.00 | -1.25 | -1.05 | -1.10 |
| YKL165C | MCD4       | 1.00 | -1.26 | -1.30 | -1.10 |
| YAR023C |            | 1.00 | -1.27 | -1.12 | -1.10 |
| YMR204C |            | 1.00 | -1.27 | -1.01 | -1.10 |
| YHR181W |            | 1.00 | -1.28 | -1.21 | -1.10 |
| YMR177W | MMT1       | 1.00 | -1.30 | -1.37 | -1.10 |
| YIL026C | IRR1       | 1.00 | -1.31 | -1.26 | -1.10 |
| YOR363C | PIP2       | 1.00 | -1.31 | -1.12 | -1.10 |
| YIL013C | PDR11      | 1.00 | -1.32 | 1.04  | -1.10 |
| YDR198C |            | 1.00 | -1.45 | -1.10 | -1.10 |
| YER024W | YAT2       | 1.00 | -1.48 | -1.55 | -1.10 |
| YDR413C |            | 1.00 | -1.52 | -1.19 | -1.10 |
| YHR204W | HTM1       | 1.00 | -1.53 | -1.30 | -1.10 |
| YDR292C | SRP101     | 1.00 | -1.91 | -1.52 | -1.10 |
| YDL102W | CDC2       | 1.00 | 1.27  | -1.12 | -1.11 |
| YDL033C |            | 1.00 | 1.20  | -1.22 | -1.11 |
| YPL024W | NCE4       | 1.00 | 1.20  | 1.12  | -1.11 |
| YCL038C |            | 1.00 | 1.17  | -1.11 | -1.11 |
| YDL218W |            | 1.00 | 1.12  | 1.16  | -1.11 |
| YDR424C | DYN2       | 1.00 | 1.12  | 1.01  | -1.11 |
| YNL005C | MRP7       | 1.00 | 1.11  | 1.04  | -1.11 |
| YGR289C | MAL11      | 1.00 | 1.09  | 1.13  | -1.11 |
| YPL010W | RET3       | 1.00 | 1.09  | 1.08  | -1.11 |
| YEL012W | UBC8       | 1.00 | 1.08  | -1.01 | -1.11 |
| YMR325W |            | 1.00 | 1.06  | -1.04 | -1.11 |
| YDR028C | REG1       | 1.00 | 1.04  | -1.01 | -1.11 |
| YGL085W |            | 1.00 | 1.04  | 1.06  | -1.11 |
| YIR005W | IST3       | 1.00 | 1.03  | 1.03  | -1.11 |
| YNL230C | ELA1       | 1.00 | 1.02  | 1.02  | -1.11 |
| YOR216C | RUD3       | 1.00 | 1.02  | -1.05 | -1.11 |
| YGL263W | COS12      | 1.00 | 1.01  | -1.12 | -1.11 |
| YNL116W |            | 1.00 | 1.01  | -1.13 | -1.11 |
| YBL010C |            | 1.00 | 1.00  | 1.08  | -1.11 |
| YDR323C | PEP7       | 1.00 | 1.00  | -1.04 | -1.11 |
| YHR012W | VPS29      | 1.00 | 1.00  | -1.11 | -1.11 |
| YBR164C | ARL1       | 1.00 | -1.01 | -1.03 | -1.11 |
| YLR165C | PUS5       | 1.00 | -1.01 | -1.10 | -1.11 |
| YPL187W | MF(ALPHA)1 | 1.00 | -1.01 | -1.33 | -1.11 |

|         |        |      |       |       |       |
|---------|--------|------|-------|-------|-------|
| YBL060W |        | 1.00 | -1.02 | -1.14 | -1.11 |
| YNL252C | MRPL17 | 1.00 | -1.02 | 1.09  | -1.11 |
| YMR054W | STV1   | 1.00 | -1.03 | -1.24 | -1.11 |
| YMR066W | SOV1   | 1.00 | -1.03 | -1.07 | -1.11 |
| YNL046W |        | 1.00 | -1.03 | 1.13  | -1.11 |
| YDL028C | MPS1   | 1.00 | -1.04 | -1.07 | -1.11 |
| YBR009C | HHF1   | 1.00 | -1.05 | 1.02  | -1.11 |
| YMR026C | PEX12  | 1.00 | -1.05 | 1.01  | -1.11 |
| YLR033W | RSC58  | 1.00 | -1.06 | 1.02  | -1.11 |
| YMR278W |        | 1.00 | -1.06 | -1.02 | -1.11 |
| YPR078C |        | 1.00 | -1.06 | -1.24 | -1.11 |
| YOL015W |        | 1.00 | -1.08 | -1.13 | -1.11 |
| YPL208W |        | 1.00 | -1.08 | 1.06  | -1.11 |
| YPR031W |        | 1.00 | -1.08 | -1.07 | -1.11 |
| YBL051C | PIN4   | 1.00 | -1.09 | -1.13 | -1.11 |
| YGR007W | MUQ1   | 1.00 | -1.09 | -1.11 | -1.11 |
| YHR153C | SPO16  | 1.00 | -1.10 | 1.15  | -1.11 |
| YKL168C | KKQ8   | 1.00 | -1.10 | -1.06 | -1.11 |
| YDR378C | LSM6   | 1.00 | -1.13 | -1.09 | -1.11 |
| YEL056W | HAT2   | 1.00 | -1.13 | -1.04 | -1.11 |
| YML070W | DAK1   | 1.00 | -1.13 | 1.16  | -1.11 |
| YLL017W |        | 1.00 | -1.14 | -1.16 | -1.11 |
| YBR244W | GPX2   | 1.00 | -1.16 | -1.05 | -1.11 |
| YDR048C |        | 1.00 | -1.16 | -1.19 | -1.11 |
| YLR350W |        | 1.00 | -1.16 | 1.21  | -1.11 |
| YBR270C |        | 1.00 | -1.18 | -1.14 | -1.11 |
| YNL081C |        | 1.00 | -1.18 | -1.08 | -1.11 |
| YER014W | HEM14  | 1.00 | -1.19 | -1.11 | -1.11 |
| YGR169C |        | 1.00 | -1.19 | -1.21 | -1.11 |
| YDR525W |        | 1.00 | -1.20 | -1.06 | -1.11 |
| YML078W | CPR3   | 1.00 | -1.21 | 1.07  | -1.11 |
| YMR299C |        | 1.00 | -1.22 | -1.15 | -1.11 |
| YOR106W | VAM3   | 1.00 | -1.23 | -1.05 | -1.11 |
| YNL090W | RHO2   | 1.00 | -1.24 | -1.28 | -1.11 |
| YLR380W | CSR1   | 1.00 | -1.26 | -1.29 | -1.11 |
| YPL128C | TBF1   | 1.00 | -1.27 | -1.11 | -1.11 |
| YDL008W | APC11  | 1.00 | -1.28 | -1.20 | -1.11 |
| YJR006W | HYS2   | 1.00 | -1.29 | -1.03 | -1.11 |
| YAR064W |        | 1.00 | -1.30 | -1.11 | -1.11 |
| YFL008W | SMC1   | 1.00 | -1.30 | -1.31 | -1.11 |
| YGR097W | ASK10  | 1.00 | -1.31 | -1.21 | -1.11 |
| YOL018C | TLG2   | 1.00 | -1.33 | -1.29 | -1.11 |
| YKL190W | CNB1   | 1.00 | -1.35 | -1.32 | -1.11 |
| YGR132C | PHB1   | 1.00 | -1.37 | -1.14 | -1.11 |
| YKL071W |        | 1.00 | -1.37 | -1.08 | -1.11 |
| YGL121C |        | 1.00 | -1.43 | -1.42 | -1.11 |
| YJR092W | BUD4   | 1.00 | -1.45 | -1.19 | -1.11 |
| YBL097W | BRN1   | 1.00 | -1.46 | -1.81 | -1.11 |
| YJR160C |        | 1.00 | -1.50 | -1.15 | -1.11 |
| YAL008W | FUN14  | 1.00 | -1.64 | -1.42 | -1.11 |
| YHR099W | TRA1   | 1.00 | -1.83 | -1.54 | -1.11 |
| YOR012W |        | 1.00 | -1.97 | -1.33 | -1.11 |
| YHR079C | IRE1   | 1.00 | -1.26 | -1.23 | -1.11 |
| YDR096W | GIS1   | 1.00 | 1.47  | 1.49  | -1.12 |
| YEL052W | AFG1   | 1.00 | 1.16  | 1.15  | -1.12 |
| YNR074C |        | 1.00 | 1.14  | 1.03  | -1.12 |
| YGL041C |        | 1.00 | 1.13  | 1.03  | -1.12 |
| YPR011C |        | 1.00 | 1.13  | -1.13 | -1.12 |
| YOL146W |        | 1.00 | 1.11  | -1.03 | -1.12 |
| YDL085W |        | 1.00 | 1.09  | -1.05 | -1.12 |
| YPL203W | TPK2   | 1.00 | 1.09  | 1.28  | -1.12 |

|         |       |      |       |       |       |
|---------|-------|------|-------|-------|-------|
| YJL150W |       | 1.00 | 1.06  | -1.24 | -1.12 |
| YHL003C | LAG1  | 1.00 | 1.05  | -1.13 | -1.12 |
| YLR085C | ARP6  | 1.00 | 1.04  | 1.03  | -1.12 |
| YNR071C |       | 1.00 | 1.04  | -1.05 | -1.12 |
| YAL066W |       | 1.00 | 1.02  | -1.12 | -1.12 |
| YOR073W |       | 1.00 | 1.02  | 1.11  | -1.12 |
| YGR222W | PET54 | 1.00 | 1.00  | -1.04 | -1.12 |
| YKL198C | PTK1  | 1.00 | -1.02 | -1.07 | -1.12 |
| YFL029C | CAK1  | 1.00 | -1.03 | -1.05 | -1.12 |
| YKL117W | SBA1  | 1.00 | -1.03 | 1.16  | -1.12 |
| YDL068W |       | 1.00 | -1.04 | -1.08 | -1.12 |
| YPL245W |       | 1.00 | -1.08 | -1.21 | -1.12 |
| YJL018W |       | 1.00 | -1.09 | -1.07 | -1.12 |
| YLR212C | TUB4  | 1.00 | -1.11 | -1.09 | -1.12 |
| YOL009C | MDM12 | 1.00 | -1.11 | 1.00  | -1.12 |
| YBL019W | APN2  | 1.00 | -1.13 | -1.15 | -1.12 |
| YOR288C | MPD1  | 1.00 | -1.13 | -1.03 | -1.12 |
| YOR385W |       | 1.00 | -1.13 | 1.21  | -1.12 |
| YDR358W | GGA1  | 1.00 | -1.14 | -1.16 | -1.12 |
| YIL003W | DRE3  | 1.00 | -1.14 | -1.06 | -1.12 |
| YOR381W | FRE3  | 1.00 | -1.14 | -1.12 | -1.12 |
| YPR064W |       | 1.00 | -1.14 | 1.02  | -1.12 |
| YPL055C |       | 1.00 | -1.15 | -1.06 | -1.12 |
| YOL157C |       | 1.00 | -1.16 | 1.03  | -1.12 |
| YGR145W |       | 1.00 | -1.17 | -1.29 | -1.12 |
| YKR075C |       | 1.00 | -1.17 | 1.22  | -1.12 |
| YOR364W |       | 1.00 | -1.17 | -1.05 | -1.12 |
| YFR027W | ECO1  | 1.00 | -1.18 | -1.21 | -1.12 |
| YER109C | FLO8  | 1.00 | -1.19 | -1.21 | -1.12 |
| YDR155C | CPH1  | 1.00 | -1.20 | -1.21 | -1.12 |
| YER032W | FIR1  | 1.00 | -1.20 | -1.04 | -1.12 |
| YDR485C |       | 1.00 | -1.21 | -1.16 | -1.12 |
| YGR047C | TFC4  | 1.00 | -1.23 | -1.23 | -1.12 |
| YNL321W |       | 1.00 | -1.23 | -1.27 | -1.12 |
| YDL142C | CRD1  | 1.00 | -1.25 | -1.09 | -1.12 |
| YOR067C | ALG8  | 1.00 | -1.26 | -1.11 | -1.12 |
| YBR190W |       | 1.00 | -1.28 | -1.21 | -1.12 |
| YLR181C |       | 1.00 | -1.28 | -1.20 | -1.12 |
| YNL022C |       | 1.00 | -1.28 | -1.06 | -1.12 |
| YNL216W | RAP1  | 1.00 | -1.29 | -1.36 | -1.12 |
| YEL077C |       | 1.00 | -1.30 | -1.03 | -1.12 |
| YHL029C |       | 1.00 | -1.30 | -1.23 | -1.12 |
| YNR068C |       | 1.00 | -1.31 | -1.36 | -1.12 |
| YLR053C |       | 1.00 | -1.33 | -1.23 | -1.12 |
| YAL064W |       | 1.00 | -1.34 | -1.25 | -1.12 |
| YLR397C | AFG2  | 1.00 | -1.34 | -1.40 | -1.12 |
| YJR154W |       | 1.00 | -1.36 | -1.36 | -1.12 |
| YHR138C |       | 1.00 | -1.37 | -1.27 | -1.12 |
| YHL031C | GOS1  | 1.00 | -1.39 | -1.12 | -1.12 |
| YMR106C | YKU80 | 1.00 | -1.39 | -1.16 | -1.12 |
| YKL011C | CCE1  | 1.00 | -1.42 | -1.09 | -1.12 |
| YFL003C | MSH4  | 1.00 | -1.44 | -1.36 | -1.12 |
| YLR308W | CDA2  | 1.00 | -1.45 | -1.12 | -1.12 |
| YLL001W | DNM1  | 1.00 | -1.46 | -1.30 | -1.12 |
| YCL045C |       | 1.00 | -1.50 | -1.24 | -1.12 |
| YFL038C | YPT1  | 1.00 | -1.50 | -1.13 | -1.12 |
| YGR263C |       | 1.00 | -1.50 | -1.30 | -1.12 |
| YAL020C | ATS1  | 1.00 | -1.51 | -1.41 | -1.12 |
| YDL141W | BPL1  | 1.00 | -1.51 | -1.15 | -1.12 |
| YHL007C | STE20 | 1.00 | -1.51 | -1.49 | -1.12 |
| YLR284C | ECI1  | 1.00 | -1.51 | -1.19 | -1.12 |

|         |       |      |       |       |       |
|---------|-------|------|-------|-------|-------|
| YDR461W | MFA1  | 1.00 | -1.69 | -1.92 | -1.12 |
| YOR284W |       | 1.00 | -1.70 | -1.35 | -1.12 |
| YLR446W |       | 1.00 | -1.77 | 1.27  | -1.12 |
| YBR126C | TPS1  | 1.00 | 1.64  | 1.42  | -1.13 |
| YFR015C | GSY1  | 1.00 | 1.46  | 2.26  | -1.13 |
| YKL109W | HAP4  | 1.00 | 1.21  | 1.29  | -1.13 |
| YBR284W |       | 1.00 | 1.09  | -1.04 | -1.13 |
| YFR044C |       | 1.00 | 1.07  | 1.06  | -1.13 |
| YAR047C |       | 1.00 | 1.05  | -1.20 | -1.13 |
| YLR314C | CDC3  | 1.00 | 1.03  | 1.06  | -1.13 |
| YKR037C | SPC34 | 1.00 | 1.02  | 1.14  | -1.13 |
| YDR522C | SPS2  | 1.00 | 1.01  | -1.06 | -1.13 |
| YDL029W | ARP2  | 1.00 | -1.01 | 1.23  | -1.13 |
| YDL199C |       | 1.00 | -1.01 | 1.06  | -1.13 |
| YML102W | CAC2  | 1.00 | -1.02 | 1.00  | -1.13 |
| YCR079W |       | 1.00 | -1.03 | -1.07 | -1.13 |
| YJR012C |       | 1.00 | -1.03 | -1.15 | -1.13 |
| YMR118C |       | 1.00 | -1.03 | -1.06 | -1.13 |
| YOL034W |       | 1.00 | -1.03 | -1.08 | -1.13 |
| YIL163C |       | 1.00 | -1.04 | -1.13 | -1.13 |
| YLR309C | IMH1  | 1.00 | -1.06 | 1.14  | -1.13 |
| YGR242W |       | 1.00 | -1.07 | -1.03 | -1.13 |
| YOL065C | INP54 | 1.00 | -1.07 | -1.01 | -1.13 |
| YOL125W |       | 1.00 | -1.07 | -1.22 | -1.13 |
| YMR203W | TOM40 | 1.00 | -1.09 | -1.02 | -1.13 |
| YER012W | PRE1  | 1.00 | -1.13 | -1.03 | -1.13 |
| YKL161C |       | 1.00 | -1.13 | -1.10 | -1.13 |
| YNR033W | ABZ1  | 1.00 | -1.13 | -1.10 | -1.13 |
| YBR163W | DEM1  | 1.00 | -1.14 | -1.06 | -1.13 |
| YPL172C | COX10 | 1.00 | -1.15 | -1.10 | -1.13 |
| YBR124W |       | 1.00 | -1.17 | -1.12 | -1.13 |
| YFL032W |       | 1.00 | -1.17 | -1.18 | -1.13 |
| YKL019W | RAM2  | 1.00 | -1.18 | -1.04 | -1.13 |
| YPR092W |       | 1.00 | -1.18 | -1.16 | -1.13 |
| YER149C | PEA2  | 1.00 | -1.20 | -1.03 | -1.13 |
| YOL132W |       | 1.00 | -1.21 | -1.29 | -1.13 |
| YOL100W | PKH2  | 1.00 | -1.22 | -1.01 | -1.13 |
| YNL026W |       | 1.00 | -1.25 | -1.10 | -1.13 |
| YMR089C | YTA12 | 1.00 | -1.27 | 1.22  | -1.13 |
| YHR213W |       | 1.00 | -1.28 | -1.19 | -1.13 |
| YPR153W |       | 1.00 | -1.30 | -1.10 | -1.13 |
| YFL057C |       | 1.00 | -1.32 | -1.15 | -1.13 |
| YNL068C | FKH2  | 1.00 | -1.36 | -1.25 | -1.13 |
| YDR020C |       | 1.00 | -1.38 | -1.25 | -1.13 |
| YPL217C | BMS1  | 1.00 | -1.40 | -1.25 | -1.13 |
| YGR006W | PRP18 | 1.00 | -1.44 | -1.35 | -1.13 |
| YOR009W | TIR4  | 1.00 | -1.45 | -1.33 | -1.13 |
| YDR101C |       | 1.00 | -1.46 | -1.53 | -1.13 |
| YDR128W |       | 1.00 | -1.48 | -1.24 | -1.13 |
| YBL107C |       | 1.00 | -1.49 | -1.43 | -1.13 |
| YJR123W | RPS5  | 1.00 | -1.55 | -1.39 | -1.13 |
| YLR087C | CSF1  | 1.00 | -1.57 | -1.31 | -1.13 |
| YKL169C |       | 1.00 | -1.59 | -1.46 | -1.13 |
| YGR186W | TFG1  | 1.00 | -1.67 | -1.07 | -1.13 |
| YDR513W | TTR1  | 1.00 | 1.37  | 1.16  | -1.14 |
| YJL074C | SMC3  | 1.00 | 1.34  | 1.54  | -1.14 |
| YMR173W | DDR48 | 1.00 | 1.32  | 1.12  | -1.14 |
| YNL304W | YPT11 | 1.00 | 1.24  | 1.03  | -1.14 |
| YOL048C |       | 1.00 | 1.21  | 1.27  | -1.14 |
| YGR082W | TOM20 | 1.00 | 1.15  | 1.07  | -1.14 |
| YIL068C | SEC6  | 1.00 | 1.15  | -1.05 | -1.14 |

|         |        |      |       |       |       |
|---------|--------|------|-------|-------|-------|
| YOR152C |        | 1.00 | 1.15  | -1.05 | -1.14 |
| YDR225W | HTA1   | 1.00 | 1.11  | 1.26  | -1.14 |
| YPL100W |        | 1.00 | 1.09  | 1.07  | -1.14 |
| YDR231C | COX20  | 1.00 | 1.06  | -1.10 | -1.14 |
| YLL029W |        | 1.00 | 1.05  | 1.03  | -1.14 |
| YDR426C |        | 1.00 | 1.04  | -1.12 | -1.14 |
| YCL057W | PRD1   | 1.00 | 1.03  | 1.02  | -1.14 |
| YKR032W |        | 1.00 | 1.01  | -1.01 | -1.14 |
| YAL039C | CYC3   | 1.00 | -1.01 | 1.10  | -1.14 |
| YOL003C |        | 1.00 | -1.01 | -1.08 | -1.14 |
| YDR285W | ZIP1   | 1.00 | -1.02 | -1.18 | -1.14 |
| YER167W | BCK2   | 1.00 | -1.02 | 1.01  | -1.14 |
| YNL272C | SEC2   | 1.00 | -1.02 | -1.10 | -1.14 |
| YPR134W | MSS18  | 1.00 | -1.02 | -1.06 | -1.14 |
| YJL113W |        | 1.00 | -1.04 | 1.10  | -1.14 |
| YNL265C | IST1   | 1.00 | -1.05 | -1.01 | -1.14 |
| YDL089W |        | 1.00 | -1.06 | -1.35 | -1.14 |
| YOR087W |        | 1.00 | -1.06 | 1.11  | -1.14 |
| YJR053W | BFA1   | 1.00 | -1.08 | 1.01  | -1.14 |
| YPR095C | SYT1   | 1.00 | -1.09 | -1.29 | -1.14 |
| YPR127W |        | 1.00 | -1.11 | 1.05  | -1.14 |
| YDR276C | PMP3   | 1.00 | -1.13 | -1.05 | -1.14 |
| YKR047W |        | 1.00 | -1.13 | -1.17 | -1.14 |
| YER104W | RTT105 | 1.00 | -1.15 | -1.22 | -1.14 |
| YLR176C | RFX1   | 1.00 | -1.15 | -1.27 | -1.14 |
| YLR195C | NMT1   | 1.00 | -1.16 | 1.04  | -1.14 |
| YPL051W | ARL3   | 1.00 | -1.16 | -1.14 | -1.14 |
| YPL224C | MMT2   | 1.00 | -1.16 | -1.02 | -1.14 |
| YKL195W |        | 1.00 | -1.17 | -1.22 | -1.14 |
| YNL323W | LEM3   | 1.00 | -1.17 | 1.16  | -1.14 |
| YDR372C |        | 1.00 | -1.18 | -1.23 | -1.14 |
| YJR014W |        | 1.00 | -1.18 | -1.09 | -1.14 |
| YPL168W |        | 1.00 | -1.18 | -1.17 | -1.14 |
| YKR091W | SRL3   | 1.00 | -1.20 | -1.05 | -1.14 |
| YKL191W | DPH2   | 1.00 | -1.21 | -1.18 | -1.14 |
| YNL311C |        | 1.00 | -1.21 | -1.24 | -1.14 |
| YKR019C | IRS4   | 1.00 | -1.24 | -1.13 | -1.14 |
| YJL079C | PRY1   | 1.00 | -1.25 | -1.12 | -1.14 |
| YIL056W |        | 1.00 | -1.26 | -1.13 | -1.14 |
| YDR085C | AFR1   | 1.00 | -1.28 | -1.08 | -1.14 |
| YDR395W | SXM1   | 1.00 | -1.28 | 1.04  | -1.14 |
| YGL194C | HOS2   | 1.00 | -1.34 | -1.26 | -1.14 |
| YDR068W | DOS2   | 1.00 | -1.36 | -1.06 | -1.14 |
| YPR055W | SEC8   | 1.00 | -1.37 | -1.23 | -1.14 |
| YIL059C |        | 1.00 | -1.38 | -1.32 | -1.14 |
| YKL166C | TPK3   | 1.00 | -1.40 | -1.45 | -1.14 |
| YLL062C | MHT1   | 1.00 | -1.40 | -1.08 | -1.14 |
| YJR058C | APS2   | 1.00 | -1.45 | -1.09 | -1.14 |
| YHR001W | OSH7   | 1.00 | -1.49 | -1.48 | -1.14 |
| YGL215W | CLG1   | 1.00 | -1.50 | -1.44 | -1.14 |
| YDL043C | PRP11  | 1.00 | -1.55 | 1.06  | -1.14 |
| YJR137C | ECM17  | 1.00 | -1.56 | -1.07 | -1.14 |
| YHR209W |        | 1.00 | -1.66 | -1.37 | -1.14 |
| YPR190C | RPC82  | 1.00 | -1.70 | -1.23 | -1.14 |
| YDL151C | FYV3   | 1.00 | 1.25  | 1.04  | -1.15 |
| YNR073C |        | 1.00 | 1.21  | 1.08  | -1.15 |
| YPL138C | SPP1   | 1.00 | 1.21  | 1.10  | -1.15 |
| YIL033C | BCY1   | 1.00 | 1.20  | 1.34  | -1.15 |
| YGL260W |        | 1.00 | 1.16  | 1.03  | -1.15 |
| YER125W | RSP5   | 1.00 | 1.13  | 1.01  | -1.15 |
| YLL005C | SPO75  | 1.00 | 1.13  | 1.03  | -1.15 |

|         |        |      |       |       |       |
|---------|--------|------|-------|-------|-------|
| YKL026C | GPX1   | 1.00 | 1.11  | -1.04 | -1.15 |
| YPR130C |        | 1.00 | 1.11  | -1.01 | -1.15 |
| YBR071W |        | 1.00 | 1.07  | 1.21  | -1.15 |
| YJL072C |        | 1.00 | 1.06  | -1.18 | -1.15 |
| YKL072W | STB6   | 1.00 | 1.03  | -1.02 | -1.15 |
| YBL040C | ERD2   | 1.00 | -1.01 | -1.11 | -1.15 |
| YNL040W |        | 1.00 | -1.01 | -1.04 | -1.15 |
| YNL198C |        | 1.00 | -1.01 | -1.03 | -1.15 |
| YER094C | PUP3   | 1.00 | -1.02 | -1.08 | -1.15 |
| YPR188C | MLC2   | 1.00 | -1.02 | -1.13 | -1.15 |
| YBR092C | PHO3   | 1.00 | -1.04 | -1.23 | -1.15 |
| YGL004C |        | 1.00 | -1.04 | -1.20 | -1.15 |
| YLR431C |        | 1.00 | -1.04 | -1.13 | -1.15 |
| YOR264W |        | 1.00 | -1.04 | 1.25  | -1.15 |
| YPL253C | VIK1   | 1.00 | -1.05 | 1.00  | -1.15 |
| YPL271W | ATP15  | 1.00 | -1.05 | 1.20  | -1.15 |
| YOL116W | MSN1   | 1.00 | -1.06 | -1.12 | -1.15 |
| YNL053W | MSG5   | 1.00 | -1.07 | -1.12 | -1.15 |
| YBL094C |        | 1.00 | -1.08 | -1.17 | -1.15 |
| YMR167W | MLH1   | 1.00 | -1.12 | -1.06 | -1.15 |
| YDR022C | CIS1   | 1.00 | -1.13 | -1.12 | -1.15 |
| YFL061W |        | 1.00 | -1.13 | -1.06 | -1.15 |
| YGL235W |        | 1.00 | -1.13 | -1.28 | -1.15 |
| YGR062C | COX18  | 1.00 | -1.13 | -1.22 | -1.15 |
| YLL007C |        | 1.00 | -1.13 | -1.21 | -1.15 |
| YPL115C | BEM3   | 1.00 | -1.13 | -1.16 | -1.15 |
| YDR230W |        | 1.00 | -1.14 | -1.19 | -1.15 |
| YJL154C | VPS35  | 1.00 | -1.14 | -1.05 | -1.15 |
| YDL010W |        | 1.00 | -1.15 | -1.19 | -1.15 |
| YIR025W | MND2   | 1.00 | -1.15 | -1.07 | -1.15 |
| YJR055W | HIT1   | 1.00 | -1.15 | -1.15 | -1.15 |
| YBL006C |        | 1.00 | -1.17 | -1.24 | -1.15 |
| YHL020C | OPI1   | 1.00 | -1.19 | -1.08 | -1.15 |
| YHR036W |        | 1.00 | -1.20 | -1.19 | -1.15 |
| YGL056C | SDS23  | 1.00 | -1.21 | 1.03  | -1.15 |
| YML072C |        | 1.00 | -1.22 | -1.31 | -1.15 |
| YOL057W |        | 1.00 | -1.22 | -1.09 | -1.15 |
| YDL154W | MSH5   | 1.00 | -1.23 | -1.29 | -1.15 |
| YOR238W |        | 1.00 | -1.24 | -1.27 | -1.15 |
| YBL033C | RIB1   | 1.00 | -1.26 | -1.15 | -1.15 |
| YER186C |        | 1.00 | -1.26 | 1.23  | -1.15 |
| YFR035C |        | 1.00 | -1.28 | -1.23 | -1.15 |
| YGR197C | SNG1   | 1.00 | -1.29 | -1.13 | -1.15 |
| YHR047C | AAP1'  | 1.00 | -1.29 | -1.17 | -1.15 |
| YHR140W |        | 1.00 | -1.30 | -1.25 | -1.15 |
| YNL056W |        | 1.00 | -1.35 | -1.14 | -1.15 |
| YLR188W | MDL1   | 1.00 | -1.38 | -1.22 | -1.15 |
| YER173W | RAD24  | 1.00 | -1.41 | -1.26 | -1.15 |
| YLR156W |        | 1.00 | -1.42 | -1.18 | -1.15 |
| YFR022W |        | 1.00 | -1.45 | -1.39 | -1.15 |
| YLR256W | HAP1   | 1.00 | -1.45 | -1.36 | -1.15 |
| YGR161C |        | 1.00 | -1.52 | -1.28 | -1.15 |
| YPR125W |        | 1.00 | -1.53 | -1.75 | -1.15 |
| YHR184W | SSP1   | 1.00 | -1.55 | -1.40 | -1.15 |
| YKL173W | SNU114 | 1.00 | -1.71 | -1.27 | -1.15 |
| YMR313C |        | 1.00 | -1.72 | -1.32 | -1.15 |
| YBR222C | FAT2   | 1.00 | -1.75 | -1.83 | -1.15 |
| YDR045C | RPC11  | 1.00 | -1.78 | -1.30 | -1.15 |
| YDL215C | GDH2   | 1.00 | -1.87 | -1.56 | -1.15 |
| YKL082C |        | 1.00 | -1.89 | -1.36 | -1.15 |
| YDR111C |        | 1.00 | -2.14 | -1.56 | -1.15 |



|         |        |      |       |       |       |
|---------|--------|------|-------|-------|-------|
| YHR070W | TRM5   | 1.00 | -2.34 | -1.24 | -1.15 |
| YOR302W |        | 1.00 | -2.58 | -1.74 | -1.15 |
| YMR170C | ALD2   | 1.00 | 3.83  | 2.23  | -1.16 |
| YER058W | PET117 | 1.00 | 1.21  | -1.09 | -1.16 |
| YGR010W |        | 1.00 | 1.17  | -1.12 | -1.16 |
| YLL006W | MMM1   | 1.00 | 1.11  | -1.04 | -1.16 |
| YKL127W | PGM1   | 1.00 | 1.09  | 1.29  | -1.16 |
| YJL152W |        | 1.00 | 1.07  | -1.09 | -1.16 |
| YOR249C | APC5   | 1.00 | 1.04  | 1.06  | -1.16 |
| YMR064W | AEP1   | 1.00 | 1.02  | 1.01  | -1.16 |
| YER079W |        | 1.00 | 1.00  | 1.21  | -1.16 |
| YBL102W | SFT2   | 1.00 | -1.01 | -1.16 | -1.16 |
| YGR084C | MRP13  | 1.00 | -1.01 | -1.32 | -1.16 |
| YHL004W | MRP4   | 1.00 | -1.01 | -1.16 | -1.16 |
| YNL292W | PUS4   | 1.00 | -1.01 | -1.12 | -1.16 |
| YNL033W |        | 1.00 | -1.03 | -1.12 | -1.16 |
| YGR073C |        | 1.00 | -1.04 | 1.03  | -1.16 |
| YIL009W | FAA3   | 1.00 | -1.04 | -1.08 | -1.16 |
| YCR066W | RAD18  | 1.00 | -1.07 | -1.14 | -1.16 |
| YLR103C | CDC45  | 1.00 | -1.07 | -1.18 | -1.16 |
| YBR112C | CYC8   | 1.00 | -1.08 | -1.11 | -1.16 |
| YOR366W |        | 1.00 | -1.08 | -1.17 | -1.16 |
| YGL152C |        | 1.00 | -1.09 | -1.14 | -1.16 |
| YPL132W | COX11  | 1.00 | -1.09 | -1.03 | -1.16 |
| YKL136W |        | 1.00 | -1.13 | -1.19 | -1.16 |
| YNL193W |        | 1.00 | -1.13 | -1.08 | -1.16 |
| YJL004C | SYS1   | 1.00 | -1.14 | -1.21 | -1.16 |
| YLR370C | ARC18  | 1.00 | -1.14 | -1.23 | -1.16 |
| YPL205C |        | 1.00 | -1.14 | -1.12 | -1.16 |
| YDR534C | FIT1   | 1.00 | -1.15 | -1.20 | -1.16 |
| YGL247W |        | 1.00 | -1.16 | -1.20 | -1.16 |
| YGR227W | DIE2   | 1.00 | -1.16 | -1.31 | -1.16 |
| YDL104C | QRI7   | 1.00 | -1.21 | -1.05 | -1.16 |
| YHL023C |        | 1.00 | -1.21 | -1.13 | -1.16 |
| YMR163C |        | 1.00 | -1.21 | -1.19 | -1.16 |
| YGR005C | TFG2   | 1.00 | -1.22 | -1.06 | -1.16 |
| YKL199C | YKT9   | 1.00 | -1.24 | -1.16 | -1.16 |
| YNL099C |        | 1.00 | -1.24 | -1.21 | -1.16 |
| YKL213C | DOA1   | 1.00 | -1.25 | -1.05 | -1.16 |
| YOR050C |        | 1.00 | -1.25 | -1.21 | -1.16 |
| YLR016C |        | 1.00 | -1.28 | -1.13 | -1.16 |
| YNR042W |        | 1.00 | -1.28 | -1.28 | -1.16 |
| YDR058C | TGL2   | 1.00 | -1.29 | -1.28 | -1.16 |
| YPR164W | KIM3   | 1.00 | -1.31 | -1.28 | -1.16 |
| YGR094W | VAS1   | 1.00 | -1.32 | -1.38 | -1.16 |
| YNL164C |        | 1.00 | -1.32 | -1.32 | -1.16 |
| YPR074C | TKL1   | 1.00 | -1.32 | -1.08 | -1.16 |
| YER143W | DDI1   | 1.00 | -1.33 | 1.06  | -1.16 |
| YPL105C |        | 1.00 | -1.35 | -1.11 | -1.16 |
| YML108W |        | 1.00 | -1.37 | -1.35 | -1.16 |
| YBL106C | SRO77  | 1.00 | -1.41 | -1.36 | -1.16 |
| YBR121C | GRS1   | 1.00 | -1.44 | -1.33 | -1.16 |
| YNL111C | CYB5   | 1.00 | -1.48 | -1.02 | -1.16 |
| YOL120C | RPL18A | 1.00 | -1.53 | -1.49 | -1.16 |
| YOL131W |        | 1.00 | -1.64 | -1.41 | -1.16 |
| YOR190W | SPR1   | 1.00 | -1.73 | -1.19 | -1.16 |
| YDR508C | GNP1   | 1.00 | -1.81 | -1.10 | -1.16 |
| YBR078W | ECM33  | 1.00 | -2.07 | -1.95 | -1.16 |
| YNL261W | ORC5   | 1.00 | -2.12 | -1.26 | -1.16 |
| YPR155C | NCA2   | 1.00 | 1.10  | 1.14  | -1.17 |
| YNL316C | PHA2   | 1.00 | 1.02  | -1.04 | -1.17 |

|         |        |      |       |       |       |
|---------|--------|------|-------|-------|-------|
| YMR283C | RIT1   | 1.00 | 1.00  | -1.16 | -1.17 |
| YMR304W | UBP15  | 1.00 | 1.00  | 1.09  | -1.17 |
| YHL006C | SHU1   | 1.00 | -1.02 | -1.32 | -1.17 |
| YBR027C |        | 1.00 | -1.03 | -1.23 | -1.17 |
| YGL153W | PEX14  | 1.00 | -1.03 | -1.23 | -1.17 |
| YCR084C | TUP1   | 1.00 | -1.04 | 1.33  | -1.17 |
| YHR145C |        | 1.00 | -1.05 | 1.17  | -1.17 |
| YPR166C | MRP2   | 1.00 | -1.05 | -1.15 | -1.17 |
| YHR191C | CTF8   | 1.00 | -1.07 | -1.25 | -1.17 |
| YLR445W |        | 1.00 | -1.07 | -1.21 | -1.17 |
| YNL329C | PEX6   | 1.00 | -1.08 | -1.07 | -1.17 |
| YBL091C | MAP2   | 1.00 | -1.09 | -1.22 | -1.17 |
| YNR072W | HXT17  | 1.00 | -1.09 | -1.16 | -1.17 |
| YOR336W | KRE5   | 1.00 | -1.09 | -1.16 | -1.17 |
| YBL061C | SKT5   | 1.00 | -1.11 | -1.19 | -1.17 |
| YHL022C | SPO11  | 1.00 | -1.11 | -1.07 | -1.17 |
| YMR003W |        | 1.00 | -1.11 | 1.08  | -1.17 |
| YGR209C | TRX2   | 1.00 | -1.13 | 1.04  | -1.17 |
| YOR020C | HSP10  | 1.00 | -1.13 | -1.16 | -1.17 |
| YCL036W |        | 1.00 | -1.14 | -1.16 | -1.17 |
| YCL065W |        | 1.00 | -1.14 | -1.19 | -1.17 |
| YGL199C |        | 1.00 | -1.14 | -1.27 | -1.17 |
| YOL056W | GPM3   | 1.00 | -1.15 | -1.32 | -1.17 |
| YOR263C |        | 1.00 | -1.15 | 1.32  | -1.17 |
| YGL066W |        | 1.00 | -1.17 | -1.19 | -1.17 |
| YJR022W | LSM8   | 1.00 | -1.18 | -1.22 | -1.17 |
| YMR040W |        | 1.00 | -1.18 | -1.02 | -1.17 |
| YPL204W | HRR25  | 1.00 | -1.18 | -1.19 | -1.17 |
| YPR076W |        | 1.00 | -1.20 | -1.09 | -1.17 |
| YGL238W | CSE1   | 1.00 | -1.22 | -1.41 | -1.17 |
| YGL116W | CDC20  | 1.00 | -1.24 | -1.23 | -1.17 |
| YKL139W | CTK1   | 1.00 | -1.25 | -1.29 | -1.17 |
| YMR018W |        | 1.00 | -1.25 | -1.12 | -1.17 |
| YBR068C | BAP2   | 1.00 | -1.26 | -1.13 | -1.17 |
| YKR082W | NUP133 | 1.00 | -1.26 | -1.11 | -1.17 |
| YOR252W |        | 1.00 | -1.26 | -1.24 | -1.17 |
| YDL030W | PRP9   | 1.00 | -1.27 | -1.23 | -1.17 |
| YHR075C | PPE1   | 1.00 | -1.27 | -1.16 | -1.17 |
| YER022W | SRB4   | 1.00 | -1.28 | -1.20 | -1.17 |
| YMR240C | CUS1   | 1.00 | -1.29 | -1.28 | -1.17 |
| YLR389C | STE23  | 1.00 | -1.31 | 1.08  | -1.17 |
| YBR125C | PTC4   | 1.00 | -1.33 | -1.42 | -1.17 |
| YHR168W |        | 1.00 | -1.33 | -1.35 | -1.17 |
| YOL154W |        | 1.00 | -1.33 | -1.06 | -1.17 |
| YBR073W | RDH54  | 1.00 | -1.35 | -1.42 | -1.17 |
| YDR092W | UBC13  | 1.00 | -1.35 | -1.28 | -1.17 |
| YHR095W |        | 1.00 | -1.35 | -1.38 | -1.17 |
| YCR068W | CVT17  | 1.00 | -1.36 | -1.21 | -1.17 |
| YJR030C |        | 1.00 | -1.37 | -1.21 | -1.17 |
| YPR008W | HAA1   | 1.00 | -1.37 | -1.17 | -1.17 |
| YBR110W | ALG1   | 1.00 | -1.41 | -1.48 | -1.17 |
| YGL211W |        | 1.00 | -1.42 | -1.21 | -1.17 |
| YDR347W | MRP1   | 1.00 | -1.52 | -1.54 | -1.17 |
| YKL034W |        | 1.00 | -1.53 | -1.25 | -1.17 |
| YJL157C | FAR1   | 1.00 | -1.71 | -1.40 | -1.17 |
| YGR283C |        | 1.00 | -1.72 | -1.34 | -1.17 |
| YKL201C | MNN4   | 1.00 | -1.81 | -1.56 | -1.17 |
| YBR165W | UBS1   | 1.00 | -2.10 | -2.13 | -1.17 |
| YDL021W | GPM2   | 1.00 | 1.08  | 1.22  | -1.18 |
| YJL057C | IKS1   | 1.00 | 1.03  | -1.05 | -1.18 |
| YKL111C |        | 1.00 | 1.02  | 1.08  | -1.18 |

|         |        |      |       |       |       |
|---------|--------|------|-------|-------|-------|
| YIL141W |        | 1.00 | 1.01  | -1.14 | -1.18 |
| YPL165C |        | 1.00 | 1.01  | -1.02 | -1.18 |
| YNR061C |        | 1.00 | 1.00  | -1.08 | -1.18 |
| YGL184C | STR3   | 1.00 | -1.01 | -1.24 | -1.18 |
| YLR348C | DIC1   | 1.00 | -1.03 | -1.01 | -1.18 |
| YKR034W | DAL80  | 1.00 | -1.04 | -1.13 | -1.18 |
| YPL258C | THI21  | 1.00 | -1.04 | -1.12 | -1.18 |
| YBR051W |        | 1.00 | -1.06 | 1.12  | -1.18 |
| YHR057C | CYP2   | 1.00 | -1.06 | -1.20 | -1.18 |
| YDL183C |        | 1.00 | -1.07 | -1.21 | -1.18 |
| YIL135C |        | 1.00 | -1.09 | -1.19 | -1.18 |
| YLR004C |        | 1.00 | -1.09 | -1.02 | -1.18 |
| YBR059C | AKL1   | 1.00 | -1.10 | -1.10 | -1.18 |
| YNR022C |        | 1.00 | -1.11 | -1.15 | -1.18 |
| YCR011C | ADP1   | 1.00 | -1.12 | -1.26 | -1.18 |
| YER042W | MXR1   | 1.00 | -1.13 | 1.05  | -1.18 |
| YML112W | CTK3   | 1.00 | -1.13 | -1.12 | -1.18 |
| YCR003W | MRPL32 | 1.00 | -1.14 | -1.11 | -1.18 |
| YKL097C |        | 1.00 | -1.14 | -1.08 | -1.18 |
| YGR295C | COS6   | 1.00 | -1.15 | 1.05  | -1.18 |
| YBL053W |        | 1.00 | -1.16 | -1.15 | -1.18 |
| YDL194W | SNF3   | 1.00 | -1.16 | -1.08 | -1.18 |
| YGL093W | SPC105 | 1.00 | -1.16 | -1.12 | -1.18 |
| YDR445C |        | 1.00 | -1.17 | -1.24 | -1.18 |
| YHR061C | GIC1   | 1.00 | -1.17 | -1.17 | -1.18 |
| YNR077C |        | 1.00 | -1.17 | -1.26 | -1.18 |
| YPL125W | KAP120 | 1.00 | -1.17 | -1.06 | -1.18 |
| YER013W | PRP22  | 1.00 | -1.18 | -1.31 | -1.18 |
| YBR020W | GAL1   | 1.00 | -1.20 | -1.15 | -1.18 |
| YPR027C |        | 1.00 | -1.20 | -1.09 | -1.18 |
| YJR001W |        | 1.00 | -1.22 | -1.11 | -1.18 |
| YIL058W |        | 1.00 | -1.23 | -1.23 | -1.18 |
| YML065W | ORC1   | 1.00 | -1.23 | -1.10 | -1.18 |
| YOR196C | LIP5   | 1.00 | -1.23 | -1.24 | -1.18 |
| YBR205W | KTR3   | 1.00 | -1.24 | -1.45 | -1.18 |
| YMR277W | FCP1   | 1.00 | -1.25 | 1.08  | -1.18 |
| YDR437W |        | 1.00 | -1.26 | -1.25 | -1.18 |
| YPR182W | SMX3   | 1.00 | -1.26 | -1.27 | -1.18 |
| YBR069C | TAT1   | 1.00 | -1.28 | -1.31 | -1.18 |
| YMR102C |        | 1.00 | -1.28 | -1.16 | -1.18 |
| YGR029W | ERV1   | 1.00 | -1.29 | -1.36 | -1.18 |
| YEL008W |        | 1.00 | -1.32 | -1.20 | -1.18 |
| YGR258C | RAD2   | 1.00 | -1.32 | -1.25 | -1.18 |
| YNL294C |        | 1.00 | -1.34 | -1.31 | -1.18 |
| YDL091C |        | 1.00 | -1.36 | -1.29 | -1.18 |
| YPR096C |        | 1.00 | -1.40 | -1.33 | -1.18 |
| YPL151C | PRP46  | 1.00 | -1.42 | -1.33 | -1.18 |
| YBR147W |        | 1.00 | -1.49 | -1.47 | -1.18 |
| YLL061W | MMP1   | 1.00 | -1.49 | -1.08 | -1.18 |
| YGL002W | ERP6   | 1.00 | -1.50 | -1.45 | -1.18 |
| YKR074W |        | 1.00 | -1.50 | -1.11 | -1.18 |
| YBR081C | SPT7   | 1.00 | -1.55 | -1.46 | -1.18 |
| YJL222W | VTH2   | 1.00 | -1.55 | -1.35 | -1.18 |
| YDR217C | RAD9   | 1.00 | -1.57 | -1.32 | -1.18 |
| YJL170C | ASG7   | 1.00 | -2.00 | -1.24 | -1.18 |
| YHR080C |        | 1.00 | -2.12 | -1.53 | -1.18 |
| YGR088W | CTT1   | 1.00 | 1.96  | 1.21  | -1.19 |
| YHR106W | TRR2   | 1.00 | 1.11  | 1.29  | -1.19 |
| YDL065C | PEX19  | 1.00 | 1.10  | 1.00  | -1.19 |
| YML004C | GLO1   | 1.00 | 1.09  | 1.14  | -1.19 |
| YGR232W | NAS6   | 1.00 | 1.06  | -1.26 | -1.19 |

|         |       |      |       |       |       |
|---------|-------|------|-------|-------|-------|
| YAL046C |       | 1.00 | 1.01  | -1.22 | -1.19 |
| YPL192C | PRM3  | 1.00 | 1.00  | -1.19 | -1.19 |
| YNL222W | SSU72 | 1.00 | -1.01 | 1.01  | -1.19 |
| YOR075W | UFE1  | 1.00 | -1.01 | 1.10  | -1.19 |
| YNL245C |       | 1.00 | -1.02 | -1.04 | -1.19 |
| YKR015C |       | 1.00 | -1.04 | -1.13 | -1.19 |
| YNL127W |       | 1.00 | -1.04 | 1.05  | -1.19 |
| YDL093W | PMT5  | 1.00 | -1.05 | -1.15 | -1.19 |
| YPL098C |       | 1.00 | -1.05 | -1.05 | -1.19 |
| YOR229W | WTM2  | 1.00 | -1.06 | -1.14 | -1.19 |
| YER111C | SWI4  | 1.00 | -1.09 | -1.16 | -1.19 |
| YLR362W | STE11 | 1.00 | -1.10 | -1.06 | -1.19 |
| YML114C | TAF65 | 1.00 | -1.13 | -1.17 | -1.19 |
| YER121W |       | 1.00 | -1.14 | -1.08 | -1.19 |
| YDR044W | HEM13 | 1.00 | -1.15 | 1.00  | -1.19 |
| YBR201W | DER1  | 1.00 | -1.18 | -1.21 | -1.19 |
| YBR297W | MAL33 | 1.00 | -1.18 | -1.11 | -1.19 |
| YHR130C |       | 1.00 | -1.19 | -1.15 | -1.19 |
| YNL021W | HDA1  | 1.00 | -1.19 | -1.27 | -1.19 |
| YAR044W | OSH1  | 1.00 | -1.20 | -1.26 | -1.19 |
| YBR056W |       | 1.00 | -1.20 | -1.18 | -1.19 |
| YCR054C | CTR86 | 1.00 | -1.21 | -1.25 | -1.19 |
| YLR036C |       | 1.00 | -1.21 | -1.15 | -1.19 |
| YBL022C | PIM1  | 1.00 | -1.22 | -1.23 | -1.19 |
| YML119W |       | 1.00 | -1.24 | -1.26 | -1.19 |
| YDL074C | BRE1  | 1.00 | -1.25 | -1.32 | -1.19 |
| YDL197C | ASF2  | 1.00 | -1.25 | -1.02 | -1.19 |
| YMR182C | RGM1  | 1.00 | -1.27 | -1.13 | -1.19 |
| YBR011C | IPP1  | 1.00 | -1.31 | -1.33 | -1.19 |
| YDR397C | NCB2  | 1.00 | -1.32 | -1.36 | -1.19 |
| YPL062W |       | 1.00 | -1.37 | -1.03 | -1.19 |
| YKL033W |       | 1.00 | -1.40 | -1.16 | -1.19 |
| YLR265C | NEJ1  | 1.00 | -1.40 | -1.41 | -1.19 |
| YBR001C | NTH2  | 1.00 | -1.43 | -1.28 | -1.19 |
| YJL208C | NUC1  | 1.00 | -1.43 | -1.12 | -1.19 |
| YJR155W | AAD10 | 1.00 | -1.47 | -1.29 | -1.19 |
| YOL152W | FRE7  | 1.00 | -1.49 | -1.17 | -1.19 |
| YOR300W |       | 1.00 | -1.51 | -1.23 | -1.19 |
| YOR043W | WHI2  | 1.00 | -1.53 | -1.22 | -1.19 |
| YLR098C | CHA4  | 1.00 | -1.54 | -1.32 | -1.19 |
| YHL018W |       | 1.00 | -1.60 | -1.51 | -1.19 |
| YHR091C | MSR1  | 1.00 | -1.67 | -1.44 | -1.19 |
| YHR201C | PPX1  | 1.00 | -1.77 | -1.47 | -1.19 |
| YOR161C |       | 1.00 | 2.00  | 1.17  | -1.20 |
| YKL193C | SDS22 | 1.00 | 1.40  | 1.09  | -1.20 |
| YDR533C |       | 1.00 | 1.22  | -1.21 | -1.20 |
| YGR089W |       | 1.00 | 1.17  | -1.18 | -1.20 |
| YER059W | PCL6  | 1.00 | 1.07  | -1.06 | -1.20 |
| YIL172C |       | 1.00 | 1.06  | -1.04 | -1.20 |
| YNL122C |       | 1.00 | 1.05  | -1.03 | -1.20 |
| YGR179C | OKP1  | 1.00 | 1.04  | -1.21 | -1.20 |
| YIL051C | MMF1  | 1.00 | 1.04  | -1.17 | -1.20 |
| YJL185C |       | 1.00 | 1.04  | -1.16 | -1.20 |
| YNL336W | COS1  | 1.00 | -1.01 | 1.00  | -1.20 |
| YJL195C |       | 1.00 | -1.02 | -1.23 | -1.20 |
| YPL056C |       | 1.00 | -1.02 | -1.11 | -1.20 |
| YBR299W | MAL32 | 1.00 | -1.05 | 1.06  | -1.20 |
| YJR057W | CDC8  | 1.00 | -1.06 | -1.08 | -1.20 |
| YKR063C | LAS1  | 1.00 | -1.07 | -1.09 | -1.20 |
| YIL001W |       | 1.00 | -1.11 | 1.06  | -1.20 |
| YLR383W | RHC18 | 1.00 | -1.12 | -1.24 | -1.20 |

|         |           |      |       |       |       |
|---------|-----------|------|-------|-------|-------|
| YNR014W |           | 1.00 | -1.12 | -1.18 | -1.20 |
| YDL057W |           | 1.00 | -1.13 | -1.31 | -1.20 |
| YOR135C |           | 1.00 | -1.13 | -1.03 | -1.20 |
| YGL107C |           | 1.00 | -1.14 | -1.33 | -1.20 |
| YKL132C | RMA1      | 1.00 | -1.14 | -1.08 | -1.20 |
| YNL246W |           | 1.00 | -1.15 | -1.10 | -1.20 |
| YEL062W | NPR2      | 1.00 | -1.16 | -1.01 | -1.20 |
| YGL084C | GUP1      | 1.00 | -1.16 | -1.02 | -1.20 |
| YOL024W |           | 1.00 | -1.16 | -1.13 | -1.20 |
| YHR165C | PRP8      | 1.00 | -1.17 | -1.10 | -1.20 |
| YOR172W |           | 1.00 | -1.17 | -1.12 | -1.20 |
| YPR107C | YTH1      | 1.00 | -1.17 | -1.07 | -1.20 |
| YLR461W | PAU4      | 1.00 | -1.18 | -1.12 | -1.20 |
| YNL041C | TFI2      | 1.00 | -1.18 | -1.14 | -1.20 |
| YMR114C |           | 1.00 | -1.19 | 1.02  | -1.20 |
| YIR029W | DAL2      | 1.00 | -1.22 | -1.14 | -1.20 |
| YBR091C | MRS5      | 1.00 | -1.23 | -1.22 | -1.20 |
| YJL030W | MAD2      | 1.00 | -1.25 | -1.31 | -1.20 |
| YGL226W |           | 1.00 | -1.28 | -1.41 | -1.20 |
| YML105C | SEC65     | 1.00 | -1.30 | -1.16 | -1.20 |
| YOR057W | SGT1      | 1.00 | -1.30 | -1.36 | -1.20 |
| YNL251C | NRD1      | 1.00 | -1.31 | -1.07 | -1.20 |
| YER066W |           | 1.00 | -1.32 | -1.19 | -1.20 |
| YKR020W |           | 1.00 | -1.32 | -1.23 | -1.20 |
| YLR237W | THI7      | 1.00 | -1.32 | -1.27 | -1.20 |
| YJL002C | OST1      | 1.00 | -1.36 | -1.25 | -1.20 |
| YLR277C | YSH1      | 1.00 | -1.36 | -1.37 | -1.20 |
| YHL017W |           | 1.00 | -1.38 | -1.43 | -1.20 |
| YBL009W |           | 1.00 | -1.44 | -1.29 | -1.20 |
| YMR119W | ASI1      | 1.00 | -1.48 | -1.10 | -1.20 |
| YLR117C | CLF1      | 1.00 | -1.55 | -1.49 | -1.20 |
| YKR073C |           | 1.00 | -1.60 | -1.15 | -1.20 |
| YFR051C | RET2      | 1.00 | -1.74 | 1.14  | -1.20 |
| YCR039C | MATALPHA2 | 1.00 | -1.79 | -2.16 | -1.20 |
| YBR197C |           | 1.00 | -1.92 | -2.04 | -1.20 |
| YBR130C | SHE3      | 1.00 | -2.15 | -2.02 | -1.20 |
| YIL101C | XBP1      | 1.00 | 1.17  | -1.01 | -1.21 |
| YAR069C |           | 1.00 | 1.06  | -1.14 | -1.21 |
| YER139C |           | 1.00 | 1.05  | -1.09 | -1.21 |
| YPR026W | ATH1      | 1.00 | 1.02  | -1.18 | -1.21 |
| YNR063W |           | 1.00 | 1.01  | -1.09 | -1.21 |
| YIL008W | URM1      | 1.00 | 1.00  | -1.19 | -1.21 |
| YDR124W |           | 1.00 | -1.03 | -1.11 | -1.21 |
| YDR273W |           | 1.00 | -1.04 | -1.17 | -1.21 |
| YER178W | PDA1      | 1.00 | -1.05 | 1.12  | -1.21 |
| YHR182W |           | 1.00 | -1.05 | -1.43 | -1.21 |
| YPL264C |           | 1.00 | -1.05 | -1.23 | -1.21 |
| YBR273C |           | 1.00 | -1.09 | -1.17 | -1.21 |
| YIL017C | VID28     | 1.00 | -1.09 | -1.14 | -1.21 |
| YLL013C | PUF3      | 1.00 | -1.09 | -1.22 | -1.21 |
| YOL162W |           | 1.00 | -1.11 | -1.12 | -1.21 |
| YER096W | SHC1      | 1.00 | -1.12 | -1.10 | -1.21 |
| YJL039C | NUP192    | 1.00 | -1.12 | -1.11 | -1.21 |
| YPR158W |           | 1.00 | -1.12 | -1.18 | -1.21 |
| YBR260C | RGD1      | 1.00 | -1.15 | -1.14 | -1.21 |
| YMR320W |           | 1.00 | -1.15 | -1.15 | -1.21 |
| YCR041W |           | 1.00 | -1.16 | -1.07 | -1.21 |
| YOR269W | PAC1      | 1.00 | -1.16 | -1.19 | -1.21 |
| YFR026C |           | 1.00 | -1.17 | -1.29 | -1.21 |
| YPL039W |           | 1.00 | -1.17 | -1.31 | -1.21 |
| YCR095C |           | 1.00 | -1.19 | -1.08 | -1.21 |

|         |        |      |       |       |       |
|---------|--------|------|-------|-------|-------|
| YER163C |        | 1.00 | -1.19 | -1.11 | -1.21 |
| YIR044C |        | 1.00 | -1.21 | -1.14 | -1.21 |
| YJL071W | ARG2   | 1.00 | -1.21 | -1.31 | -1.21 |
| YJL114W |        | 1.00 | -1.21 | -1.22 | -1.21 |
| YBR072W | HSP26  | 1.00 | -1.22 | -1.08 | -1.21 |
| YKL027W |        | 1.00 | -1.24 | -1.34 | -1.21 |
| YNL008C | ASI3   | 1.00 | -1.25 | -1.28 | -1.21 |
| YOR274W | MOD5   | 1.00 | -1.26 | -1.24 | -1.21 |
| YMR068W |        | 1.00 | -1.27 | 1.12  | -1.21 |
| YDR411C |        | 1.00 | -1.30 | 1.12  | -1.21 |
| YHR212C |        | 1.00 | -1.30 | -1.20 | -1.21 |
| YMR288W | HSH155 | 1.00 | -1.30 | -1.34 | -1.21 |
| YNL106C | INP52  | 1.00 | -1.30 | -1.14 | -1.21 |
| YDL243C | AAD4   | 1.00 | -1.31 | -1.29 | -1.21 |
| YDR182W | CDC1   | 1.00 | -1.31 | -1.08 | -1.21 |
| YLL020C |        | 1.00 | -1.31 | -1.11 | -1.21 |
| YHL030W | ECM29  | 1.00 | -1.33 | -1.40 | -1.21 |
| YLL060C | GTT2   | 1.00 | -1.33 | -1.21 | -1.21 |
| YLR210W | CLB4   | 1.00 | -1.33 | -1.26 | -1.21 |
| YDL059C | RAD59  | 1.00 | -1.34 | -1.25 | -1.21 |
| YIR023W | DAL81  | 1.00 | -1.34 | -1.22 | -1.21 |
| YIL028W |        | 1.00 | -1.35 | -1.28 | -1.21 |
| YDR288W |        | 1.00 | -1.36 | -1.12 | -1.21 |
| YKL210W | UBA1   | 1.00 | -1.40 | -1.05 | -1.21 |
| YER023W | PRO3   | 1.00 | -1.43 | -1.21 | -1.21 |
| YMR067C |        | 1.00 | -1.44 | 1.08  | -1.21 |
| YER063W | THO1   | 1.00 | -1.45 | -1.12 | -1.21 |
| YKL014C |        | 1.00 | -1.45 | -1.30 | -1.21 |
| YPR168W | NUT2   | 1.00 | -1.46 | -1.15 | -1.21 |
| YKL116C | PRR1   | 1.00 | -1.47 | -1.34 | -1.21 |
| YHR103W | SBE22  | 1.00 | -1.48 | -1.36 | -1.21 |
| YKL078W |        | 1.00 | -1.49 | -1.40 | -1.21 |
| YGL197W | MDS3   | 1.00 | -1.50 | -1.76 | -1.21 |
| YLR326W |        | 1.00 | -1.50 | -1.46 | -1.21 |
| YMR042W | ARG80  | 1.00 | -1.51 | -1.48 | -1.21 |
| YDR053W |        | 1.00 | -1.54 | -1.36 | -1.21 |
| YML089C |        | 1.00 | -1.58 | -1.16 | -1.21 |
| YOR164C |        | 1.00 | -1.61 | -1.09 | -1.21 |
| YLL012W |        | 1.00 | -1.66 | -1.46 | -1.21 |
| YGR035C |        | 1.00 | -1.76 | -1.38 | -1.21 |
| YDR112W |        | 1.00 | -2.33 | -1.74 | -1.21 |
| YDR205W | MSC2   | 1.00 | -2.36 | -1.69 | -1.21 |
| YIL045W | PIG2   | 1.00 | 1.17  | 1.27  | -1.22 |
| YOR052C |        | 1.00 | 1.12  | 1.12  | -1.22 |
| YGR167W | CLC1   | 1.00 | 1.01  | -1.04 | -1.22 |
| YMR326C |        | 1.00 | -1.04 | -1.03 | -1.22 |
| YPR131C | NAT3   | 1.00 | -1.04 | -1.07 | -1.22 |
| YDR436W | PPZ2   | 1.00 | -1.05 | -1.04 | -1.22 |
| YIL107C | PFK26  | 1.00 | -1.07 | -1.14 | -1.22 |
| YEL066W | HPA3   | 1.00 | -1.08 | -1.08 | -1.22 |
| YOL108C | INO4   | 1.00 | -1.09 | -1.08 | -1.22 |
| YLR132C |        | 1.00 | -1.10 | -1.11 | -1.22 |
| YMR115W |        | 1.00 | -1.10 | -1.11 | -1.22 |
| YPL213W | LEA1   | 1.00 | -1.11 | -1.16 | -1.22 |
| YDR250C |        | 1.00 | -1.12 | -1.02 | -1.22 |
| YJL075C |        | 1.00 | -1.12 | 1.11  | -1.22 |
| YML110C | COQ5   | 1.00 | -1.12 | 1.10  | -1.22 |
| YHR031C | RRM3   | 1.00 | -1.16 | -1.07 | -1.22 |
| YPL196W | OXR1   | 1.00 | -1.17 | 1.06  | -1.22 |
| YPR082C | DIB1   | 1.00 | -1.18 | -1.07 | -1.22 |
| YCR018C | SRD1   | 1.00 | -1.19 | -1.17 | -1.22 |



|         |        |      |       |       |       |
|---------|--------|------|-------|-------|-------|
| YNL260C |        | 1.00 | -1.20 | -1.27 | -1.22 |
| YKR058W | GLG1   | 1.00 | -1.21 | -1.23 | -1.22 |
| YBL014C | RRN6   | 1.00 | -1.22 | -1.58 | -1.22 |
| YGL032C | AGA2   | 1.00 | -1.22 | -1.18 | -1.22 |
| YDR057W |        | 1.00 | -1.25 | -1.17 | -1.22 |
| YNL029C | KTR5   | 1.00 | -1.25 | -1.41 | -1.22 |
| YIR007W |        | 1.00 | -1.26 | -1.15 | -1.22 |
| YLR133W | CKI1   | 1.00 | -1.32 | -1.02 | -1.22 |
| YBR010W | HHT1   | 1.00 | -1.33 | -1.31 | -1.22 |
| YDL137W | ARF2   | 1.00 | -1.34 | 1.19  | -1.22 |
| YDR415C |        | 1.00 | -1.37 | -1.18 | -1.22 |
| YLL010C | PSR1   | 1.00 | -1.42 | -1.39 | -1.22 |
| YAL009W | SPO7   | 1.00 | -1.46 | -1.52 | -1.22 |
| YOR326W | MYO2   | 1.00 | -1.48 | -1.11 | -1.22 |
| YHR136C | SPL2   | 1.00 | -1.50 | -1.36 | -1.22 |
| YJL036W | SNX4   | 1.00 | -1.53 | -1.21 | -1.22 |
| YLL036C | PRP19  | 1.00 | -1.56 | -1.60 | -1.22 |
| YDR151C | CTH1   | 1.00 | -1.66 | -1.40 | -1.22 |
| YMR028W | TAP42  | 1.00 | -1.66 | -1.42 | -1.22 |
| YKL012W | PRP40  | 1.00 | -1.72 | -1.13 | -1.22 |
| YPR057W | BRR1   | 1.00 | -1.74 | -1.16 | -1.22 |
| YPL180W | SHD7   | 1.00 | -1.82 | -1.40 | -1.22 |
| YOL140W | ARG8   | 1.00 | -2.01 | -1.25 | -1.22 |
| YDR459C |        | 1.00 | -2.06 | -1.41 | -1.22 |
| YGR102C |        | 1.00 | -3.34 | -1.41 | -1.22 |
| YCR097W | A1     | 1.00 | -1.04 | -1.16 | -1.23 |
| YHR157W | REC104 | 1.00 | 1.25  | 1.01  | -1.23 |
| YJL141C | YAK1   | 1.00 | 1.16  | 1.55  | -1.23 |
| YGL180W | APG1   | 1.00 | 1.01  | -1.33 | -1.23 |
| YDL076C |        | 1.00 | 1.00  | -1.02 | -1.23 |
| YDL214C | PRR2   | 1.00 | 1.00  | -1.27 | -1.23 |
| YGL249W | ZIP2   | 1.00 | 1.00  | -1.14 | -1.23 |
| YBR083W | TEC1   | 1.00 | -1.02 | -1.11 | -1.23 |
| YOL069W | NUF2   | 1.00 | -1.02 | -1.08 | -1.23 |
| YPL031C | PHO85  | 1.00 | -1.04 | 1.06  | -1.23 |
| YLL065W | GIN11  | 1.00 | -1.05 | -1.12 | -1.23 |
| YPL017C |        | 1.00 | -1.07 | -1.17 | -1.23 |
| YCR060W |        | 1.00 | -1.09 | -1.10 | -1.23 |
| YIL067C |        | 1.00 | -1.10 | -1.20 | -1.23 |
| YHR102W | KIC1   | 1.00 | -1.11 | -1.30 | -1.23 |
| YAR053W |        | 1.00 | -1.12 | -1.31 | -1.23 |
| YHL005C |        | 1.00 | -1.12 | -1.26 | -1.23 |
| YKL041W | VPS24  | 1.00 | -1.13 | -1.16 | -1.23 |
| YAR028W |        | 1.00 | -1.14 | -1.03 | -1.23 |
| YNR062C |        | 1.00 | -1.15 | -1.22 | -1.23 |
| YMR206W |        | 1.00 | -1.17 | -1.22 | -1.23 |
| YNL233W | BNI4   | 1.00 | -1.18 | -1.10 | -1.23 |
| YHL040C | ARN1   | 1.00 | -1.20 | -1.32 | -1.23 |
| YJL010C |        | 1.00 | -1.20 | -1.39 | -1.23 |
| YNL107W | YAF9   | 1.00 | -1.20 | -1.29 | -1.23 |
| YBR060C | ORC2   | 1.00 | -1.21 | -1.23 | -1.23 |
| YLR360W | VPS38  | 1.00 | -1.21 | -1.21 | -1.23 |
| YDR402C | DIT2   | 1.00 | -1.23 | -1.14 | -1.23 |
| YDR473C | PRP3   | 1.00 | -1.23 | -1.28 | -1.23 |
| YKL112W | ABF1   | 1.00 | -1.23 | -1.01 | -1.23 |
| YNR017W | MAS6   | 1.00 | -1.23 | -1.07 | -1.23 |
| YGR262C | BUD32  | 1.00 | -1.24 | -1.12 | -1.23 |
| YOR321W | PMT3   | 1.00 | -1.24 | -1.09 | -1.23 |
| YHR152W | SPO12  | 1.00 | -1.25 | -1.33 | -1.23 |
| YKL157W | APE2   | 1.00 | -1.26 | -1.19 | -1.23 |
| YJR003C |        | 1.00 | -1.27 | -1.25 | -1.23 |

|         |        |      |       |       |       |
|---------|--------|------|-------|-------|-------|
| YBR094W |        | 1.00 | -1.30 | -1.18 | -1.23 |
| YDR495C | VPS3   | 1.00 | -1.30 | -1.44 | -1.23 |
| YAL042W | ERV46  | 1.00 | -1.31 | -1.37 | -1.23 |
| YHR058C | MED6   | 1.00 | -1.31 | -1.13 | -1.23 |
| YNL148C | ALF1   | 1.00 | -1.31 | -1.20 | -1.23 |
| YJL186W | MNN5   | 1.00 | -1.32 | -1.30 | -1.23 |
| YLR027C | AAT2   | 1.00 | -1.33 | -1.16 | -1.23 |
| YEL007W | TOS9   | 1.00 | -1.34 | -1.34 | -1.23 |
| YNL290W | RFC3   | 1.00 | -1.35 | -1.38 | -1.23 |
| YDL053C |        | 1.00 | -1.37 | -1.41 | -1.23 |
| YMR080C | NAM7   | 1.00 | -1.37 | -1.21 | -1.23 |
| YMR247C |        | 1.00 | -1.37 | -1.33 | -1.23 |
| YGL224C |        | 1.00 | -1.41 | -1.30 | -1.23 |
| YBR200W | BEM1   | 1.00 | -1.42 | -1.12 | -1.23 |
| YER001W | MNN1   | 1.00 | -1.52 | -1.57 | -1.23 |
| YDR449C |        | 1.00 | -1.56 | -1.66 | -1.23 |
| YPL109C |        | 1.00 | -1.57 | -1.29 | -1.23 |
| YOR194C | TOA1   | 1.00 | -1.58 | -1.14 | -1.23 |
| YFL046W |        | 1.00 | -1.63 | -1.40 | -1.23 |
| YMR146C | TIF34  | 1.00 | -1.65 | -1.42 | -1.23 |
| YDR359C | VID21  | 1.00 | -1.77 | -1.64 | -1.23 |
| YOR225W |        | 1.00 | -1.98 | -1.52 | -1.23 |
| YAL045C |        | 1.00 | -2.15 | -1.68 | -1.23 |
| YHR096C | HXT5   | 1.00 | 1.47  | 1.46  | -1.24 |
| YDR464W | SPP41  | 1.00 | 1.12  | 1.16  | -1.24 |
| YMR165C | SMP2   | 1.00 | 1.08  | -1.08 | -1.24 |
| YOL151W | GRE2   | 1.00 | 1.06  | 1.02  | -1.24 |
| YMR189W | GCV2   | 1.00 | 1.03  | -1.19 | -1.24 |
| YOR382W | FIT2   | 1.00 | 1.02  | -1.07 | -1.24 |
| YOL147C | PEX11  | 1.00 | 1.01  | 1.02  | -1.24 |
| YPL206C |        | 1.00 | 1.01  | -1.13 | -1.24 |
| YFL016C | MDJ1   | 1.00 | 1.00  | 1.06  | -1.24 |
| YJL023C | PET130 | 1.00 | -1.01 | -1.11 | -1.24 |
| YOR192C |        | 1.00 | -1.02 | 1.13  | -1.24 |
| YCL056C |        | 1.00 | -1.04 | -1.47 | -1.24 |
| YNL330C | RPD3   | 1.00 | -1.05 | -1.06 | -1.24 |
| YBR282W | MRPL27 | 1.00 | -1.08 | -1.21 | -1.24 |
| YML084W |        | 1.00 | -1.08 | -1.19 | -1.24 |
| YDL211C |        | 1.00 | -1.09 | -1.19 | -1.24 |
| YGR220C | MRPL9  | 1.00 | -1.09 | -1.29 | -1.24 |
| YMR231W | PEP5   | 1.00 | -1.09 | 1.00  | -1.24 |
| YER183C | FAU1   | 1.00 | -1.12 | -1.20 | -1.24 |
| YJR020W |        | 1.00 | -1.15 | -1.24 | -1.24 |
| YLR209C | PNP1   | 1.00 | -1.15 | -1.04 | -1.24 |
| YJL101C | GSH1   | 1.00 | -1.16 | -1.34 | -1.24 |
| YOR275C |        | 1.00 | -1.16 | -1.18 | -1.24 |
| YIR014W |        | 1.00 | -1.17 | -1.09 | -1.24 |
| YJR149W |        | 1.00 | -1.18 | -1.24 | -1.24 |
| YDL163W |        | 1.00 | -1.19 | -1.01 | -1.24 |
| YIL115C | NUP159 | 1.00 | -1.19 | -1.21 | -1.24 |
| YML066C | SMA2   | 1.00 | -1.20 | -1.20 | -1.24 |
| YOL008W |        | 1.00 | -1.20 | -1.08 | -1.24 |
| YDR122W | KIN1   | 1.00 | -1.22 | -1.12 | -1.24 |
| YEL030W | ECM10  | 1.00 | -1.24 | -1.16 | -1.24 |
| YHR076W |        | 1.00 | -1.24 | -1.24 | -1.24 |
| YOR319W | HSH49  | 1.00 | -1.24 | -1.23 | -1.24 |
| YGR116W | SPT6   | 1.00 | -1.26 | -1.20 | -1.24 |
| YBL055C |        | 1.00 | -1.27 | -1.66 | -1.24 |
| YGL077C | HNM1   | 1.00 | -1.27 | -1.22 | -1.24 |
| YPR152C |        | 1.00 | -1.27 | -1.15 | -1.24 |
| YGL176C |        | 1.00 | -1.30 | -1.14 | -1.24 |

|         |       |      |       |       |       |
|---------|-------|------|-------|-------|-------|
| YLL066C |       | 1.00 | -1.30 | -1.37 | -1.24 |
| YDL232W | OST4  | 1.00 | -1.31 | -1.20 | -1.24 |
| YIL046W | MET30 | 1.00 | -1.32 | -1.27 | -1.24 |
| YLR294C |       | 1.00 | -1.35 | -1.15 | -1.24 |
| YGL130W | CEG1  | 1.00 | -1.37 | -1.40 | -1.24 |
| YIL122W |       | 1.00 | -1.40 | -1.33 | -1.24 |
| YGL083W | SCY1  | 1.00 | -1.41 | -1.17 | -1.24 |
| YGR215W | RSM27 | 1.00 | -1.41 | -1.31 | -1.24 |
| YGL096W | TOS8  | 1.00 | -1.49 | -1.46 | -1.24 |
| YKR096W |       | 1.00 | -1.52 | -1.41 | -1.24 |
| YFL007W | BLM3  | 1.00 | -1.53 | -1.44 | -1.24 |
| YNL070W | TOM7  | 1.00 | -1.64 | -1.13 | -1.24 |
| YBL058W | SHP1  | 1.00 | -2.15 | -1.98 | -1.24 |
| YKR025W | RPC37 | 1.00 | -2.18 | -1.23 | -1.24 |
| YPL111W | CAR1  | 1.00 | 1.20  | 1.30  | -1.25 |
| YHR051W | COX6  | 1.00 | 1.15  | 1.08  | -1.25 |
| YMR322C |       | 1.00 | 1.13  | -1.16 | -1.25 |
| YPR046W | MCM16 | 1.00 | 1.13  | -1.01 | -1.25 |
| YGL190C | CDC55 | 1.00 | 1.05  | -1.16 | -1.25 |
| YAL017W | FUN31 | 1.00 | 1.04  | -1.25 | -1.25 |
| YGL040C | HEM2  | 1.00 | 1.04  | 1.03  | -1.25 |
| YCR096C | A2    | 1.00 | 1.03  | -1.12 | -1.25 |
| YMR267W | PPA2  | 1.00 | 1.02  | -1.16 | -1.25 |
| YDR284C | DPP1  | 1.00 | 1.00  | -1.10 | -1.25 |
| YHR158C | KEL1  | 1.00 | -1.05 | -1.14 | -1.25 |
| YDR268W | MSW1  | 1.00 | -1.06 | -1.20 | -1.25 |
| YGR011W |       | 1.00 | -1.06 | -1.24 | -1.25 |
| YBR139W |       | 1.00 | -1.07 | -1.18 | -1.25 |
| YGR237C |       | 1.00 | -1.07 | 1.02  | -1.25 |
| YGL250W |       | 1.00 | -1.08 | -1.19 | -1.25 |
| YOL047C |       | 1.00 | -1.08 | -1.15 | -1.25 |
| YER095W | RAD51 | 1.00 | -1.10 | -1.18 | -1.25 |
| YGL262W |       | 1.00 | -1.10 | -1.30 | -1.25 |
| YBR269C |       | 1.00 | -1.12 | -1.16 | -1.25 |
| YPR195C |       | 1.00 | -1.12 | -1.10 | -1.25 |
| YIL120W | QDR1  | 1.00 | -1.14 | -1.30 | -1.25 |
| YOR134W | BAG7  | 1.00 | -1.14 | -1.22 | -1.25 |
| YDL069C | CBS1  | 1.00 | -1.16 | -1.39 | -1.25 |
| YPR032W | SRO7  | 1.00 | -1.16 | -1.24 | -1.25 |
| YBR186W | PCH2  | 1.00 | -1.17 | -1.33 | -1.25 |
| YDL077C | VAM6  | 1.00 | -1.18 | -1.25 | -1.25 |
| YDL200C | MGT1  | 1.00 | -1.18 | -1.18 | -1.25 |
| YLR119W | SRN2  | 1.00 | -1.21 | -1.14 | -1.25 |
| YBR024W | SCO2  | 1.00 | -1.22 | -1.23 | -1.25 |
| YPL033C |       | 1.00 | -1.22 | -1.22 | -1.25 |
| YBR233W | PBP2  | 1.00 | -1.27 | -1.27 | -1.25 |
| YAR010C |       | 1.00 | -1.31 | -1.38 | -1.25 |
| YDR490C | PKH1  | 1.00 | -1.34 | -1.31 | -1.25 |
| YPL266W | DIM1  | 1.00 | -1.34 | -1.24 | -1.25 |
| YPL225W |       | 1.00 | -1.36 | -1.17 | -1.25 |
| YOR058C | ASE1  | 1.00 | -1.37 | -1.40 | -1.25 |
| YBR185C | MBA1  | 1.00 | -1.40 | -1.51 | -1.25 |
| YDL138W | RGT2  | 1.00 | -1.43 | -1.54 | -1.25 |
| YKL107W |       | 1.00 | -1.52 | -1.22 | -1.25 |
| YGR072W | UPF3  | 1.00 | -1.54 | -1.53 | -1.25 |
| YAL022C | FUN26 | 1.00 | -1.57 | -1.45 | -1.25 |
| YDR209C |       | 1.00 | -1.62 | -1.37 | -1.25 |
| YOL161C |       | 1.00 | -1.70 | -1.39 | -1.25 |
| YGR018C |       | 1.00 | -2.00 | -1.27 | -1.25 |
| YKL151C |       | 1.00 | 1.29  | 1.31  | -1.26 |
| YDL079C | MRK1  | 1.00 | 1.28  | 1.52  | -1.26 |

|         |        |      |       |       |       |
|---------|--------|------|-------|-------|-------|
| YLR149C |        | 1.00 | 1.19  | 1.15  | -1.26 |
| YDL230W | PTP1   | 1.00 | 1.12  | -1.02 | -1.26 |
| YJR107W |        | 1.00 | 1.02  | 1.05  | -1.26 |
| YOL053W |        | 1.00 | 1.01  | 1.02  | -1.26 |
| YMR099C |        | 1.00 | 1.00  | -1.03 | -1.26 |
| YLL046C | RNP1   | 1.00 | -1.03 | -1.25 | -1.26 |
| YIL170W | HXT12  | 1.00 | -1.04 | -1.10 | -1.26 |
| YOL042W | NGL1   | 1.00 | -1.05 | -1.06 | -1.26 |
| YOR081C |        | 1.00 | -1.07 | -1.10 | -1.26 |
| YBR212W | NGR1   | 1.00 | -1.13 | -1.27 | -1.26 |
| YJR086W | STE18  | 1.00 | -1.14 | -1.22 | -1.26 |
| YGR100W | MDR1   | 1.00 | -1.15 | -1.19 | -1.26 |
| YIR004W | DJP1   | 1.00 | -1.17 | -1.18 | -1.26 |
| YGL173C | KEM1   | 1.00 | -1.18 | -1.29 | -1.26 |
| YHL019C | APM2   | 1.00 | -1.19 | -1.31 | -1.26 |
| YOR266W | PNT1   | 1.00 | -1.21 | -1.22 | -1.26 |
| YGR273C |        | 1.00 | -1.22 | -1.35 | -1.26 |
| YJR032W | CPR7   | 1.00 | -1.24 | -1.25 | -1.26 |
| YJR044C |        | 1.00 | -1.24 | -1.05 | -1.26 |
| YHR119W | SET1   | 1.00 | -1.26 | -1.17 | -1.26 |
| YMR323W |        | 1.00 | -1.28 | -1.08 | -1.26 |
| YLR108C |        | 1.00 | -1.29 | -1.09 | -1.26 |
| YDR200C |        | 1.00 | -1.30 | -1.18 | -1.26 |
| YER011W | TIR1   | 1.00 | -1.30 | -1.46 | -1.26 |
| YLR268W | SEC22  | 1.00 | -1.31 | -1.22 | -1.26 |
| YOR291W |        | 1.00 | -1.31 | -1.52 | -1.26 |
| YPL007C | TFC8   | 1.00 | -1.31 | -1.14 | -1.26 |
| YML041C |        | 1.00 | -1.32 | -1.15 | -1.26 |
| YDL009C |        | 1.00 | -1.33 | -1.29 | -1.26 |
| YDR170C | SEC7   | 1.00 | -1.34 | -1.58 | -1.26 |
| YFL063W |        | 1.00 | -1.36 | -1.22 | -1.26 |
| YFR019W | FAB1   | 1.00 | -1.36 | -1.34 | -1.26 |
| YOR084W |        | 1.00 | -1.40 | -1.04 | -1.26 |
| YDR021W | FAL1   | 1.00 | -1.41 | -1.24 | -1.26 |
| YGR184C | UBR1   | 1.00 | -1.41 | -1.41 | -1.26 |
| YGR296W | YRF1-3 | 1.00 | -1.42 | -1.54 | -1.26 |
| YMR302C | PRP12  | 1.00 | -1.43 | -1.18 | -1.26 |
| YML031W | NDC1   | 1.00 | -1.56 | -1.43 | -1.26 |
| YGL171W | ROK1   | 1.00 | -1.60 | -1.38 | -1.26 |
| YJL211C |        | 1.00 | -1.60 | -1.53 | -1.26 |
| YOR290C | SNF2   | 1.00 | -1.60 | -1.40 | -1.26 |
| YJL203W | PRP21  | 1.00 | -1.66 | -1.40 | -1.26 |
| YBR223C |        | 1.00 | -1.67 | -1.53 | -1.26 |
| YBR153W | RIB7   | 1.00 | -1.68 | -1.37 | -1.26 |
| YBR296C | PHO89  | 1.00 | -1.75 | 1.03  | -1.26 |
| YGR216C | GPI1   | 1.00 | -1.92 | -1.19 | -1.26 |
| YDR543C |        | 1.00 | -1.99 | -1.38 | -1.26 |
| YMR056C | AAC1   | 1.00 | 1.28  | 1.11  | -1.27 |
| YLR258W | GSY2   | 1.00 | 1.26  | 1.06  | -1.27 |
| YNL259C | ATX1   | 1.00 | 1.00  | -1.41 | -1.27 |
| YPL173W | MRPL40 | 1.00 | 1.00  | -1.20 | -1.27 |
| YPL148C | PPT2   | 1.00 | -1.01 | -1.03 | -1.27 |
| YMR098C |        | 1.00 | -1.02 | -1.01 | -1.27 |
| YBR219C |        | 1.00 | -1.04 | -1.30 | -1.27 |
| YBR268W | MRPL37 | 1.00 | -1.04 | -1.03 | -1.27 |
| YOL163W |        | 1.00 | -1.05 | -1.37 | -1.27 |
| YPL080C |        | 1.00 | -1.05 | -1.20 | -1.27 |
| YDL094C |        | 1.00 | -1.09 | -1.11 | -1.27 |
| YER184C |        | 1.00 | -1.11 | -1.12 | -1.27 |
| YGR164W |        | 1.00 | -1.13 | -1.25 | -1.27 |
| YJL221C | FSP2   | 1.00 | -1.14 | -1.21 | -1.27 |

|         |        |      |       |       |       |
|---------|--------|------|-------|-------|-------|
| YLR411W | CTR3   | 1.00 | -1.14 | -1.31 | -1.27 |
| YLR211C |        | 1.00 | -1.16 | -1.15 | -1.27 |
| YML006C | GIS4   | 1.00 | -1.17 | -1.27 | -1.27 |
| YDR340W |        | 1.00 | -1.18 | 1.19  | -1.27 |
| YIL112W |        | 1.00 | -1.18 | -1.03 | -1.27 |
| YIL131C | FKH1   | 1.00 | -1.20 | -1.60 | -1.27 |
| YLR025W | SNF7   | 1.00 | -1.21 | -1.12 | -1.27 |
| YGL119W | ABC1   | 1.00 | -1.22 | -1.23 | -1.27 |
| YPL133C |        | 1.00 | -1.26 | -1.31 | -1.27 |
| YIR001C | SGN1   | 1.00 | -1.29 | -1.44 | -1.27 |
| YKR079C |        | 1.00 | -1.31 | -1.20 | -1.27 |
| YPL276W |        | 1.00 | -1.32 | -1.51 | -1.27 |
| YLR396C | VPS33  | 1.00 | -1.33 | -1.41 | -1.27 |
| YNL152W |        | 1.00 | -1.33 | -1.37 | -1.27 |
| YJL028W |        | 1.00 | -1.36 | -1.46 | -1.27 |
| YDR482C |        | 1.00 | -1.37 | -1.46 | -1.27 |
| YDR330W |        | 1.00 | -1.38 | -1.07 | -1.27 |
| YDR507C | GIN4   | 1.00 | -1.38 | 1.04  | -1.27 |
| YMR244W |        | 1.00 | -1.39 | -1.24 | -1.27 |
| YPL057C | SUR1   | 1.00 | -1.39 | 1.33  | -1.27 |
| YGR120C | SEC35  | 1.00 | -1.40 | -1.25 | -1.27 |
| YDL118W |        | 1.00 | -1.41 | -1.34 | -1.27 |
| YDR010C |        | 1.00 | -1.41 | -1.34 | -1.27 |
| YOR217W | RFC1   | 1.00 | -1.41 | -1.12 | -1.27 |
| YJR061W |        | 1.00 | -1.43 | -1.33 | -1.27 |
| YKL105C |        | 1.00 | -1.43 | -1.42 | -1.27 |
| YLR456W |        | 1.00 | -1.45 | -1.55 | -1.27 |
| YMR144W |        | 1.00 | -1.48 | -1.36 | -1.27 |
| YHR202W |        | 1.00 | -1.49 | -1.47 | -1.27 |
| YJR040W | GEF1   | 1.00 | -1.60 | -1.08 | -1.27 |
| YDL115C | IWR1   | 1.00 | -1.66 | -1.25 | -1.27 |
| YPR104C | FHL1   | 1.00 | -1.70 | -1.37 | -1.27 |
| YLR416C |        | 1.00 | -1.75 | -1.66 | -1.27 |
| YLR011W | LOT6   | 1.00 | -1.76 | -1.72 | -1.27 |
| YPL167C | REV3   | 1.00 | -1.77 | -1.46 | -1.27 |
| YPL246C |        | 1.00 | -2.14 | -1.64 | -1.27 |
| YPR197C |        | 1.00 | -2.16 | -1.49 | -1.27 |
| YJL182C |        | 1.00 | -2.39 | -1.14 | -1.27 |
| YNL036W | NCE103 | 1.00 | 2.32  | 1.03  | -1.28 |
| YER144C | UBP5   | 1.00 | 1.77  | 1.95  | -1.28 |
| YMR193W | MRPL24 | 1.00 | 1.05  | -1.02 | -1.28 |
| YBL067C | UBP13  | 1.00 | 1.03  | -1.13 | -1.28 |
| YDR306C |        | 1.00 | 1.01  | -1.15 | -1.28 |
| YML020W |        | 1.00 | -1.02 | -1.15 | -1.28 |
| YAR070C |        | 1.00 | -1.04 | -1.29 | -1.28 |
| YNL146W |        | 1.00 | -1.05 | -1.18 | -1.28 |
| YPL130W | SPO19  | 1.00 | -1.06 | -1.07 | -1.28 |
| YBR018C | GAL7   | 1.00 | -1.10 | -1.18 | -1.28 |
| YDL113C |        | 1.00 | -1.10 | -1.16 | -1.28 |
| YJR025C | BNA1   | 1.00 | -1.14 | -1.04 | -1.28 |
| YKR054C | DYN1   | 1.00 | -1.14 | -1.25 | -1.28 |
| YLL067C |        | 1.00 | -1.16 | -1.29 | -1.28 |
| YPR065W | ROX1   | 1.00 | -1.17 | -1.27 | -1.28 |
| YPR109W |        | 1.00 | -1.18 | -1.18 | -1.28 |
| YPR039W |        | 1.00 | -1.19 | -1.18 | -1.28 |
| YGR212W |        | 1.00 | -1.20 | -1.42 | -1.28 |
| YOL111C |        | 1.00 | -1.21 | -1.16 | -1.28 |
| YIL011W | TIR3   | 1.00 | -1.22 | -1.31 | -1.28 |
| YPR017C | DSS4   | 1.00 | -1.22 | -1.37 | -1.28 |
| YHR022C |        | 1.00 | -1.23 | -1.35 | -1.28 |
| YGR108W | CLB1   | 1.00 | -1.26 | -1.51 | -1.28 |

|         |        |      |       |       |       |
|---------|--------|------|-------|-------|-------|
| YBR033W |        | 1.00 | -1.33 | -1.48 | -1.28 |
| YHR167W | THP2   | 1.00 | -1.33 | -1.29 | -1.28 |
| YBR216C |        | 1.00 | -1.34 | -1.60 | -1.28 |
| YOR010C | TIR2   | 1.00 | -1.34 | -1.24 | -1.28 |
| YER060W | FCY21  | 1.00 | -1.35 | 1.04  | -1.28 |
| YOR121C |        | 1.00 | -1.39 | -1.40 | -1.28 |
| YKL222C |        | 1.00 | -1.42 | -1.23 | -1.28 |
| YKL008C | LAC1   | 1.00 | -1.43 | -1.54 | -1.28 |
| YKL010C | UFD4   | 1.00 | -1.43 | -1.40 | -1.28 |
| YOL164W |        | 1.00 | -1.43 | -1.34 | -1.28 |
| YPR172W |        | 1.00 | -1.47 | -1.65 | -1.28 |
| YOR239W | ABP140 | 1.00 | -1.48 | 1.23  | -1.28 |
| YOR061W | CKA2   | 1.00 | -1.57 | -1.41 | -1.28 |
| YOR115C | TRS33  | 1.00 | -1.59 | -1.35 | -1.28 |
| YJR047C | ANB1   | 1.00 | -1.62 | -1.10 | -1.28 |
| YCR017C | CWH43  | 1.00 | -1.79 | -1.83 | -1.28 |
| YPL231W | FAS2   | 1.00 | -2.28 | -1.59 | -1.28 |
| YKL192C | ACP1   | 1.00 | 1.07  | -1.09 | -1.29 |
| YLR070C |        | 1.00 | 1.03  | -1.22 | -1.29 |
| YPR160W | GPH1   | 1.00 | 1.02  | -1.27 | -1.29 |
| YGR111W |        | 1.00 | 1.01  | -1.02 | -1.29 |
| YLR312C |        | 1.00 | 1.01  | -1.19 | -1.29 |
| YOR028C | CIN5   | 1.00 | -1.02 | -1.21 | -1.29 |
| YDR421W | ARO80  | 1.00 | -1.04 | 1.03  | -1.29 |
| YPR147C |        | 1.00 | -1.06 | -1.43 | -1.29 |
| YEL070W |        | 1.00 | -1.07 | -1.09 | -1.29 |
| YMR013C | SEC59  | 1.00 | -1.09 | -1.12 | -1.29 |
| YNL338W |        | 1.00 | -1.09 | -1.29 | -1.29 |
| YDL231C | BRE4   | 1.00 | -1.10 | -1.23 | -1.29 |
| YER010C |        | 1.00 | -1.10 | -1.24 | -1.29 |
| YPL152W | RRD2   | 1.00 | -1.10 | -1.14 | -1.29 |
| YML100W | TSL1   | 1.00 | -1.11 | -1.16 | -1.29 |
| YDR403W | DIT1   | 1.00 | -1.13 | -1.03 | -1.29 |
| YGR177C | ATF2   | 1.00 | -1.14 | -1.27 | -1.29 |
| YHR123W | EPT1   | 1.00 | -1.16 | -1.46 | -1.29 |
| YIL102C |        | 1.00 | -1.16 | -1.29 | -1.29 |
| YEL031W | SPF1   | 1.00 | -1.18 | -1.30 | -1.29 |
| YGL161C |        | 1.00 | -1.18 | -1.15 | -1.29 |
| YNL043C |        | 1.00 | -1.19 | -1.19 | -1.29 |
| YKL084W |        | 1.00 | -1.20 | -1.32 | -1.29 |
| YLR090W | XDJ1   | 1.00 | -1.21 | -1.36 | -1.29 |
| YDR213W | UPC2   | 1.00 | -1.23 | -1.40 | -1.29 |
| YJL104W | MIA1   | 1.00 | -1.23 | -1.32 | -1.29 |
| YJL139C | YUR1   | 1.00 | -1.23 | -1.23 | -1.29 |
| YKR104W |        | 1.00 | -1.24 | -1.26 | -1.29 |
| YOR024W |        | 1.00 | -1.26 | -1.26 | -1.29 |
| YOR158W | PET123 | 1.00 | -1.31 | -1.19 | -1.29 |
| YPL112C |        | 1.00 | -1.31 | -1.24 | -1.29 |
| YAL058W | CNE1   | 1.00 | -1.32 | -1.29 | -1.29 |
| YOL128C |        | 1.00 | -1.32 | -1.31 | -1.29 |
| YLR220W | CCC1   | 1.00 | -1.34 | -1.14 | -1.29 |
| YDL041W | KRE26  | 1.00 | -1.36 | -1.39 | -1.29 |
| YDR265W | PEX10  | 1.00 | -1.38 | -1.49 | -1.29 |
| YJL045W |        | 1.00 | -1.39 | -1.57 | -1.29 |
| YOL078W |        | 1.00 | -1.40 | -1.36 | -1.29 |
| YLR217W |        | 1.00 | -1.42 | -1.09 | -1.29 |
| YNL144C |        | 1.00 | -1.43 | 1.36  | -1.29 |
| YPR200C | ARR2   | 1.00 | -1.44 | -1.37 | -1.29 |
| YGR284C | ERV29  | 1.00 | -1.47 | -1.41 | -1.29 |
| YLR276C | DBP9   | 1.00 | -1.47 | -1.37 | -1.29 |
| YDL221W |        | 1.00 | -1.54 | -1.20 | -1.29 |



|         |       |      |       |       |       |
|---------|-------|------|-------|-------|-------|
| YNL094W |       | 1.00 | -1.58 | -1.18 | -1.29 |
| YOR218C |       | 1.00 | -1.63 | -1.20 | -1.29 |
| YHR002W |       | 1.00 | -1.65 | -1.25 | -1.29 |
| YHR122W |       | 1.00 | -1.65 | -1.51 | -1.29 |
| YJL225C |       | 1.00 | -1.82 | -1.19 | -1.29 |
| YMR008C | PLB1  | 1.00 | -1.82 | -1.66 | -1.29 |
| YKR024C | DBP7  | 1.00 | -1.87 | -1.46 | -1.29 |
| YOR049C |       | 1.00 | -1.89 | -1.44 | -1.29 |
| YBR090C |       | 1.00 | -1.38 | -1.35 | -1.29 |
| YDR070C |       | 1.00 | 1.07  | -1.04 | -1.30 |
| YOR347C | PYK2  | 1.00 | 1.07  | 1.28  | -1.30 |
| YGR165W |       | 1.00 | 1.06  | -1.23 | -1.30 |
| YPL166W |       | 1.00 | 1.04  | -1.12 | -1.30 |
| YKL039W | PTM1  | 1.00 | -1.09 | -1.37 | -1.30 |
| YLL003W | SFI1  | 1.00 | -1.09 | -1.12 | -1.30 |
| YMR228W | MTF1  | 1.00 | -1.09 | -1.33 | -1.30 |
| YLR282C |       | 1.00 | -1.10 | -1.37 | -1.30 |
| YIL010W | DOT5  | 1.00 | -1.11 | -1.19 | -1.30 |
| YER087W |       | 1.00 | -1.13 | -1.34 | -1.30 |
| YPR192W | AQY1  | 1.00 | -1.13 | -1.14 | -1.30 |
| YLR204W | QRI5  | 1.00 | -1.16 | -1.02 | -1.30 |
| YOR127W | RGA1  | 1.00 | -1.16 | -1.43 | -1.30 |
| YNL257C | SIP3  | 1.00 | -1.18 | -1.20 | -1.30 |
| YNL140C |       | 1.00 | -1.21 | -1.17 | -1.30 |
| YBR237W | PRP5  | 1.00 | -1.22 | -1.40 | -1.30 |
| YDR123C | INO2  | 1.00 | -1.23 | -1.13 | -1.30 |
| YDL052C | SLC1  | 1.00 | -1.25 | -1.40 | -1.30 |
| YLR442C | SIR3  | 1.00 | -1.25 | -1.31 | -1.30 |
| YLR095C | IOC2  | 1.00 | -1.26 | -1.39 | -1.30 |
| YDR521W |       | 1.00 | -1.27 | -1.19 | -1.30 |
| YDR391C |       | 1.00 | -1.28 | -1.38 | -1.30 |
| YIL020C | HIS6  | 1.00 | -1.32 | -1.26 | -1.30 |
| YDR029W |       | 1.00 | -1.33 | -1.34 | -1.30 |
| YNL143C |       | 1.00 | -1.34 | -1.09 | -1.30 |
| YNL337W |       | 1.00 | -1.35 | -1.33 | -1.30 |
| YBR211C | AME1  | 1.00 | -1.36 | -1.44 | -1.30 |
| YDR102C |       | 1.00 | -1.45 | -1.47 | -1.30 |
| YMR253C |       | 1.00 | -1.53 | -1.71 | -1.30 |
| YMR076C | PDS5  | 1.00 | -1.58 | -1.24 | -1.30 |
| YBR168W |       | 1.00 | -1.60 | -1.58 | -1.30 |
| YBR176W | ECM31 | 1.00 | -1.73 | -1.49 | -1.30 |
| YDR125C | ECM18 | 1.00 | -1.79 | -1.58 | -1.30 |
| YMR222C |       | 1.00 | -1.83 | -1.40 | -1.30 |
| YGL043W | DST1  | 1.00 | -1.94 | -1.64 | -1.30 |
| YDR131C |       | 1.00 | -2.08 | -1.83 | -1.30 |
| YNL195C |       | 1.00 | 1.45  | -1.09 | -1.31 |
| YKR077W |       | 1.00 | 1.14  | -1.02 | -1.31 |
| YOR320C |       | 1.00 | 1.10  | 1.08  | -1.31 |
| YOR053W |       | 1.00 | 1.06  | 1.28  | -1.31 |
| YJR079W |       | 1.00 | 1.03  | 1.00  | -1.31 |
| YOR175C |       | 1.00 | 1.02  | -1.12 | -1.31 |
| YEL050C | RML2  | 1.00 | 1.00  | -1.31 | -1.31 |
| YOR393W | ERR1  | 1.00 | -1.03 | 1.08  | -1.31 |
| YLR376C |       | 1.00 | -1.04 | -1.17 | -1.31 |
| YOL023W | IFM1  | 1.00 | -1.05 | -1.18 | -1.31 |
| YFL015C |       | 1.00 | -1.08 | -1.21 | -1.31 |
| YPL219W | PCL8  | 1.00 | -1.08 | -1.24 | -1.31 |
| YER170W | ADK2  | 1.00 | -1.12 | -1.22 | -1.31 |
| YDL186W |       | 1.00 | -1.13 | -1.49 | -1.31 |
| YLR316C | TAD3  | 1.00 | -1.13 | -1.14 | -1.31 |
| YGR269W |       | 1.00 | -1.16 | -1.06 | -1.31 |

|         |        |      |       |       |       |
|---------|--------|------|-------|-------|-------|
| YKL159C | RCN1   | 1.00 | -1.17 | -1.28 | -1.31 |
| YOL099C |        | 1.00 | -1.20 | -1.22 | -1.31 |
| YPL123C | RNY1   | 1.00 | -1.20 | -1.19 | -1.31 |
| YNL310C |        | 1.00 | -1.21 | -1.30 | -1.31 |
| YDR518W | EUG1   | 1.00 | -1.22 | -1.15 | -1.31 |
| YOR356W |        | 1.00 | -1.22 | -1.05 | -1.31 |
| YGL200C | EMP24  | 1.00 | -1.23 | -1.28 | -1.31 |
| YNR047W |        | 1.00 | -1.25 | -1.24 | -1.31 |
| YGL104C |        | 1.00 | -1.27 | -1.24 | -1.31 |
| YGL258W |        | 1.00 | -1.30 | -1.38 | -1.31 |
| YHR124W | NDT80  | 1.00 | -1.31 | -1.52 | -1.31 |
| YJL043W |        | 1.00 | -1.32 | -1.40 | -1.31 |
| YGR092W | DBF2   | 1.00 | -1.33 | -1.38 | -1.31 |
| YHL014C | YLF2   | 1.00 | -1.34 | -1.28 | -1.31 |
| YLL022C | HIF1   | 1.00 | -1.34 | -1.31 | -1.31 |
| YNL102W | POL1   | 1.00 | -1.34 | -1.31 | -1.31 |
| YOR002W | ALG6   | 1.00 | -1.35 | -1.28 | -1.31 |
| YNL218W | MGS1   | 1.00 | -1.38 | -1.65 | -1.31 |
| YGR226C |        | 1.00 | -1.39 | -1.51 | -1.31 |
| YHR135C | YCK1   | 1.00 | -1.43 | -1.28 | -1.31 |
| YDR452W | PHM5   | 1.00 | -1.44 | -1.29 | -1.31 |
| YIL129C | TAO3   | 1.00 | -1.48 | -1.36 | -1.31 |
| YER153C | PET122 | 1.00 | -1.49 | -1.36 | -1.31 |
| YBR113W |        | 1.00 | -1.53 | -1.24 | -1.31 |
| YBR291C | CTP1   | 1.00 | -1.62 | -1.54 | -1.31 |
| YGL067W | NPY1   | 1.00 | -1.62 | -1.43 | -1.31 |
| YKL023W |        | 1.00 | -1.65 | -1.40 | -1.31 |
| YKR084C | HBS1   | 1.00 | -1.77 | -1.55 | -1.31 |
| YKL129C | MYO3   | 1.00 | -1.94 | -1.51 | -1.31 |
| YOR340C | RPA43  | 1.00 | -2.21 | -2.02 | -1.31 |
| YBR037C | SCO1   | 1.00 | -2.39 | -2.10 | -1.31 |
| YMR081C | ISF1   | 1.00 | 1.38  | 2.37  | -1.32 |
| YHR008C | SOD2   | 1.00 | 1.14  | 1.08  | -1.32 |
| YKL205W | LOS1   | 1.00 | 1.07  | -1.14 | -1.32 |
| YLR109W | AHP1   | 1.00 | -1.03 | -1.09 | -1.32 |
| YMR077C | VPS20  | 1.00 | -1.04 | -1.22 | -1.32 |
| YDR304C | CYP5   | 1.00 | -1.05 | -1.04 | -1.32 |
| YFL036W | RPO41  | 1.00 | -1.09 | -1.25 | -1.32 |
| YAL028W |        | 1.00 | -1.12 | -1.34 | -1.32 |
| YMR258C |        | 1.00 | -1.12 | -1.21 | -1.32 |
| YHR171W | APG7   | 1.00 | -1.14 | -1.24 | -1.32 |
| YIL032C |        | 1.00 | -1.20 | -1.17 | -1.32 |
| YPR193C | HPA2   | 1.00 | -1.21 | -1.20 | -1.32 |
| YHR129C | ARP1   | 1.00 | -1.24 | -1.32 | -1.32 |
| YDR446W | ECM11  | 1.00 | -1.27 | -1.41 | -1.32 |
| YKL197C | PEX1   | 1.00 | -1.32 | -1.18 | -1.32 |
| YML005W |        | 1.00 | -1.33 | -1.35 | -1.32 |
| YMR065W | KAR5   | 1.00 | -1.33 | -1.39 | -1.32 |
| YGR107W |        | 1.00 | -1.34 | -1.34 | -1.32 |
| YPR115W |        | 1.00 | -1.34 | -1.30 | -1.32 |
| YDR472W | TRS31  | 1.00 | -1.39 | -1.64 | -1.32 |
| YHL008C |        | 1.00 | -1.39 | -1.26 | -1.32 |
| YHR100C |        | 1.00 | -1.41 | -1.52 | -1.32 |
| YKR052C | MRS4   | 1.00 | -1.43 | -1.28 | -1.32 |
| YOR231W | MKK1   | 1.00 | -1.44 | -1.25 | -1.32 |
| YGR032W | GSC2   | 1.00 | -1.47 | -1.56 | -1.32 |
| YOR062C |        | 1.00 | -1.50 | -1.24 | -1.32 |
| YMR237W |        | 1.00 | -1.51 | -1.30 | -1.32 |
| YKL020C | SPT23  | 1.00 | -1.55 | -1.33 | -1.32 |
| YML046W | PRP39  | 1.00 | -1.59 | -1.51 | -1.32 |
| YIL075C | RPN2   | 1.00 | -1.64 | -1.40 | -1.32 |

|         |       |      |       |       |       |
|---------|-------|------|-------|-------|-------|
| YCL035C | GRX1  | 1.00 | -1.67 | -1.28 | -1.32 |
| YLR104W |       | 1.00 | -1.83 | -1.40 | -1.32 |
| YHR173C |       | 1.00 | -1.85 | -1.69 | -1.32 |
| YBL001C | ECM15 | 1.00 | -1.95 | -1.40 | -1.32 |
| YGR228W |       | 1.00 | -2.01 | -1.31 | -1.32 |
| YNL305C |       | 1.00 | 1.24  | 1.19  | -1.33 |
| YHL035C |       | 1.00 | 1.06  | 1.08  | -1.33 |
| YLL004W | ORC3  | 1.00 | 1.00  | -1.22 | -1.33 |
| YKR065C |       | 1.00 | -1.01 | -1.28 | -1.33 |
| YNL258C |       | 1.00 | -1.10 | -1.15 | -1.33 |
| YCL044C |       | 1.00 | -1.15 | -1.31 | -1.33 |
| YCR036W | RBK1  | 1.00 | -1.15 | -1.38 | -1.33 |
| YMR196W |       | 1.00 | -1.15 | -1.25 | -1.33 |
| YKR018C |       | 1.00 | -1.17 | -1.27 | -1.33 |
| YOR392W |       | 1.00 | -1.17 | -1.30 | -1.33 |
| YGR219W |       | 1.00 | -1.18 | -1.26 | -1.33 |
| YGL131C |       | 1.00 | -1.20 | -1.29 | -1.33 |
| YHL041W |       | 1.00 | -1.22 | -1.34 | -1.33 |
| YBL021C | HAP3  | 1.00 | -1.30 | -1.40 | -1.33 |
| YJL199C |       | 1.00 | -1.33 | -1.56 | -1.33 |
| YJR129C |       | 1.00 | -1.33 | -1.28 | -1.33 |
| YNR006W | VPS27 | 1.00 | -1.34 | -1.39 | -1.33 |
| YOR032C | HMS1  | 1.00 | -1.34 | -1.21 | -1.33 |
| YDL005C | MED2  | 1.00 | -1.35 | -1.20 | -1.33 |
| YIL134W | FLX1  | 1.00 | -1.35 | -1.32 | -1.33 |
| YLL015W | BPT1  | 1.00 | -1.36 | -1.34 | -1.33 |
| YPL008W | CHL1  | 1.00 | -1.36 | -1.23 | -1.33 |
| YJL105W |       | 1.00 | -1.37 | -1.47 | -1.33 |
| YLL053C |       | 1.00 | -1.37 | -1.45 | -1.33 |
| YMR025W |       | 1.00 | -1.37 | -1.09 | -1.33 |
| YHR211W | FLO5  | 1.00 | -1.38 | -1.25 | -1.33 |
| YJL126W | NIT2  | 1.00 | -1.38 | -1.22 | -1.33 |
| YLR267W | BOP2  | 1.00 | -1.38 | -1.13 | -1.33 |
| YHR199C |       | 1.00 | -1.40 | -1.40 | -1.33 |
| YGR271W | SLH1  | 1.00 | -1.42 | -1.48 | -1.33 |
| YOR093C |       | 1.00 | -1.43 | -1.56 | -1.33 |
| YGR270W | YTA7  | 1.00 | -1.47 | -1.60 | -1.33 |
| YLR279W |       | 1.00 | -1.51 | -1.46 | -1.33 |
| YPL212C | PUS1  | 1.00 | -1.55 | -1.47 | -1.33 |
| YFL058W | THI5  | 1.00 | -1.75 | -1.37 | -1.33 |
| YLR434C |       | 1.00 | -1.86 | -1.07 | -1.33 |
| YDR043C | NRG1  | 1.00 | -2.12 | -1.19 | -1.33 |
| YJR023C |       | 1.00 | 1.04  | -1.27 | -1.34 |
| YMR140W |       | 1.00 | 1.04  | 1.06  | -1.34 |
| YLR050C |       | 1.00 | -1.03 | -1.36 | -1.34 |
| YOR232W | MGE1  | 1.00 | -1.03 | -1.26 | -1.34 |
| YKL219W | COS9  | 1.00 | -1.04 | -1.25 | -1.34 |
| YKR087C |       | 1.00 | -1.09 | -1.12 | -1.34 |
| YNL223W | AUT2  | 1.00 | -1.11 | -1.22 | -1.34 |
| YGR022C |       | 1.00 | -1.12 | -1.10 | -1.34 |
| YLR422W |       | 1.00 | -1.12 | -1.21 | -1.34 |
| YMR176W | ECM5  | 1.00 | -1.15 | -1.15 | -1.34 |
| YPL097W | MSY1  | 1.00 | -1.15 | -1.31 | -1.34 |
| YLR363C | NMD4  | 1.00 | -1.17 | -1.47 | -1.34 |
| YOL033W | MSE1  | 1.00 | -1.17 | -1.15 | -1.34 |
| YGL138C |       | 1.00 | -1.18 | -1.57 | -1.34 |
| YPL261C |       | 1.00 | -1.18 | -1.14 | -1.34 |
| YGR188C | BUB1  | 1.00 | -1.19 | -1.30 | -1.34 |
| YDR291W |       | 1.00 | -1.20 | -1.28 | -1.34 |
| YGL222C | EDC1  | 1.00 | -1.21 | -1.45 | -1.34 |
| YBR258C | SHG1  | 1.00 | -1.29 | -1.43 | -1.34 |

|         |        |      |       |       |       |
|---------|--------|------|-------|-------|-------|
| YDR374C |        | 1.00 | -1.31 | -1.52 | -1.34 |
| YKL022C | CDC16  | 1.00 | -1.33 | -1.37 | -1.34 |
| YJR077C | MIR1   | 1.00 | -1.34 | -1.24 | -1.34 |
| YOL027C |        | 1.00 | -1.34 | -1.34 | -1.34 |
| YPL113C |        | 1.00 | -1.34 | -1.33 | -1.34 |
| YMR285C | NGL2   | 1.00 | -1.35 | -1.31 | -1.34 |
| YMR159C | APG16  | 1.00 | -1.38 | -1.23 | -1.34 |
| YKL124W | SSH4   | 1.00 | -1.40 | -1.24 | -1.34 |
| YBL093C | ROX3   | 1.00 | -1.43 | -1.28 | -1.34 |
| YOR141C | ARP8   | 1.00 | -1.43 | -1.36 | -1.34 |
| YIL118W | RHO3   | 1.00 | -1.45 | -1.41 | -1.34 |
| YJR103W | URA8   | 1.00 | -1.48 | -1.50 | -1.34 |
| YCR046C | IMG1   | 1.00 | -1.49 | -1.51 | -1.34 |
| YMR161W | HLJ1   | 1.00 | -1.50 | -1.69 | -1.34 |
| YGL065C | ALG2   | 1.00 | -1.53 | -1.07 | -1.34 |
| YNL089C |        | 1.00 | -1.61 | -1.54 | -1.34 |
| YLR200W | YKE2   | 1.00 | -1.65 | -1.51 | -1.34 |
| YOR235W |        | 1.00 | -1.70 | -1.26 | -1.34 |
| YLR009W |        | 1.00 | -2.16 | -1.53 | -1.34 |
| YDR365C |        | 1.00 | -2.55 | -1.44 | -1.34 |
| YNL052W | COX5A  | 1.00 | 1.29  | 1.40  | -1.35 |
| YPL281C | ERR2   | 1.00 | 1.05  | 1.05  | -1.35 |
| YBR003W | COQ1   | 1.00 | -1.04 | -1.05 | -1.35 |
| YCR009C | RVS161 | 1.00 | -1.04 | -1.32 | -1.35 |
| YCR075C | ERS1   | 1.00 | -1.05 | -1.32 | -1.35 |
| YDL246C |        | 1.00 | -1.14 | -1.12 | -1.35 |
| YML030W |        | 1.00 | -1.14 | -1.19 | -1.35 |
| YLR283W |        | 1.00 | -1.16 | -1.28 | -1.35 |
| YPL104W | MSD1   | 1.00 | -1.16 | -1.25 | -1.35 |
| YJR080C |        | 1.00 | -1.17 | -1.11 | -1.35 |
| YBR120C | CBP6   | 1.00 | -1.19 | -1.37 | -1.35 |
| YKR101W | SIR1   | 1.00 | -1.19 | -1.25 | -1.35 |
| YJR033C | RAV1   | 1.00 | -1.21 | -1.48 | -1.35 |
| YNL017C |        | 1.00 | -1.22 | -1.38 | -1.35 |
| YJR010W | MET3   | 1.00 | -1.27 | -1.52 | -1.35 |
| YNR070W |        | 1.00 | -1.28 | -1.30 | -1.35 |
| YGR292W | MAL12  | 1.00 | -1.29 | -1.47 | -1.35 |
| YGL178W | MPT5   | 1.00 | -1.33 | -1.05 | -1.35 |
| YKL089W | MIF2   | 1.00 | -1.35 | -1.42 | -1.35 |
| YOR140W | SFL1   | 1.00 | -1.37 | -1.40 | -1.35 |
| YOR256C |        | 1.00 | -1.37 | -1.28 | -1.35 |
| YJL201W | ECM25  | 1.00 | -1.39 | -1.37 | -1.35 |
| YDL145C | COP1   | 1.00 | -1.40 | -1.51 | -1.35 |
| YDR440W | DOT1   | 1.00 | -1.44 | -1.17 | -1.35 |
| YJL183W | MNN11  | 1.00 | -1.44 | -1.22 | -1.35 |
| YLR105C | SEN2   | 1.00 | -1.45 | -1.51 | -1.35 |
| YPR135W | CTF4   | 1.00 | -1.45 | -1.38 | -1.35 |
| YDR329C | PEX3   | 1.00 | -1.54 | -1.03 | -1.35 |
| YCL050C | APA1   | 1.00 | -1.58 | -5.80 | -1.35 |
| YBR281C |        | 1.00 | -1.61 | -1.65 | -1.35 |
| YGR239C | PEX21  | 1.00 | -1.61 | -1.45 | -1.35 |
| YLR271W |        | 1.00 | -1.68 | -1.57 | -1.35 |
| YDR147W | EKI1   | 1.00 | -1.70 | -1.48 | -1.35 |
| YAL018C |        | 1.00 | -1.74 | -2.14 | -1.35 |
| YIL169C |        | 1.00 | -2.13 | -1.22 | -1.35 |
| YJL134W | LCB3   | 1.00 | -2.26 | -1.22 | -1.35 |
| YPL247C |        | 1.00 | 1.16  | -1.09 | -1.36 |
| YGL061C | DUO1   | 1.00 | 1.09  | 1.11  | -1.36 |
| YDR272W | GLO2   | 1.00 | 1.02  | -1.20 | -1.36 |
| YFR041C |        | 1.00 | 1.01  | 1.01  | -1.36 |
| YPL116W | HOS3   | 1.00 | -1.03 | -1.24 | -1.36 |

|         |        |      |       |       |       |
|---------|--------|------|-------|-------|-------|
| YKL170W | MRPL38 | 1.00 | -1.05 | -1.13 | -1.36 |
| YGL091C | NBP35  | 1.00 | -1.07 | -1.03 | -1.36 |
| YIR038C | GTT1   | 1.00 | -1.09 | -1.22 | -1.36 |
| YDR088C | SLU7   | 1.00 | -1.12 | -1.12 | -1.36 |
| YOR147W |        | 1.00 | -1.18 | 1.01  | -1.36 |
| YJL011C |        | 1.00 | -1.19 | -1.21 | -1.36 |
| YKR049C |        | 1.00 | -1.20 | -1.26 | -1.36 |
| YLL032C |        | 1.00 | -1.32 | -1.41 | -1.36 |
| YPL099C |        | 1.00 | -1.33 | -1.04 | -1.36 |
| YOR070C | GYP1   | 1.00 | -1.35 | -1.22 | -1.36 |
| YFR018C |        | 1.00 | -1.44 | -1.09 | -1.36 |
| YGR230W | BNS1   | 1.00 | -1.47 | -1.28 | -1.36 |
| YOL113W | SKM1   | 1.00 | -1.49 | -1.32 | -1.36 |
| YNL300W | TOS6   | 1.00 | -1.52 | -1.66 | -1.36 |
| YBR245C | ISW1   | 1.00 | -1.55 | -1.42 | -1.36 |
| YHL042W |        | 1.00 | -1.56 | -1.47 | -1.36 |
| YIL018W | RPL2B  | 1.00 | -1.61 | -1.47 | -1.36 |
| YKR044W |        | 1.00 | -1.85 | -1.60 | -1.36 |
| YOR113W | AZF1   | 1.00 | -2.09 | -1.31 | -1.36 |
| YOR242C | SSP2   | 1.00 | -1.03 | -1.29 | -1.37 |
| YNR045W | PET494 | 1.00 | -1.04 | -1.29 | -1.37 |
| YOR176W | HEM15  | 1.00 | -1.10 | -1.09 | -1.37 |
| YPL249C | GYP5   | 1.00 | -1.10 | -1.34 | -1.37 |
| YML118W | NGL3   | 1.00 | -1.14 | -1.08 | -1.37 |
| YPR106W | ISR1   | 1.00 | -1.17 | -1.03 | -1.37 |
| YMR135C |        | 1.00 | -1.20 | -1.20 | -1.37 |
| YPR005C | HAL1   | 1.00 | -1.20 | -1.22 | -1.37 |
| YOR040W | GLO4   | 1.00 | -1.21 | -1.28 | -1.37 |
| YOR314W |        | 1.00 | -1.22 | -1.34 | -1.37 |
| YIL006W |        | 1.00 | -1.24 | -1.31 | -1.37 |
| YJL216C |        | 1.00 | -1.25 | -1.23 | -1.37 |
| YHR118C | ORC6   | 1.00 | -1.26 | -1.18 | -1.37 |
| YJR082C |        | 1.00 | -1.29 | -1.27 | -1.37 |
| YBL029W |        | 1.00 | -1.33 | -1.46 | -1.37 |
| YCL073C |        | 1.00 | -1.33 | -1.30 | -1.37 |
| YJR153W | PGU1   | 1.00 | -1.33 | -1.29 | -1.37 |
| YDR282C |        | 1.00 | -1.36 | -1.32 | -1.37 |
| YDL058W | USO1   | 1.00 | -1.38 | -1.37 | -1.37 |
| YOR126C | IAH1   | 1.00 | -1.38 | -1.24 | -1.37 |
| YPL077C |        | 1.00 | -1.38 | -1.43 | -1.37 |
| YLR410W | VIP1   | 1.00 | -1.39 | -1.36 | -1.37 |
| YMR019W | STB4   | 1.00 | -1.39 | -1.33 | -1.37 |
| YIL071C | PCI8   | 1.00 | -1.40 | -1.29 | -1.37 |
| YER083C |        | 1.00 | -1.41 | -1.42 | -1.37 |
| YBL079W | NUP170 | 1.00 | -1.43 | -1.31 | -1.37 |
| YNL291C | MID1   | 1.00 | -1.44 | -1.31 | -1.37 |
| YHR112C |        | 1.00 | -1.45 | -1.41 | -1.37 |
| YDR511W | ACN9   | 1.00 | -1.46 | -1.61 | -1.37 |
| YGR020C | VMA7   | 1.00 | -1.46 | -1.56 | -1.37 |
| YOR185C | GSP2   | 1.00 | -1.48 | -1.28 | -1.37 |
| YAR050W | FLO1   | 1.00 | -1.49 | -1.13 | -1.37 |
| YER137C |        | 1.00 | -1.49 | -1.36 | -1.37 |
| YDR042C |        | 1.00 | -1.51 | -1.25 | -1.37 |
| YGL163C | RAD54  | 1.00 | -1.51 | -1.53 | -1.37 |
| YOR214C |        | 1.00 | -1.51 | -1.27 | -1.37 |
| YDR262W |        | 1.00 | -1.54 | -1.24 | -1.37 |
| YCR028C | FEN2   | 1.00 | -1.65 | -1.76 | -1.37 |
| YGL118C |        | 1.00 | -1.66 | -1.35 | -1.37 |
| YDR079W | PET100 | 1.00 | -1.74 | -1.32 | -1.37 |
| YKL225W |        | 1.00 | -1.84 | -1.69 | -1.37 |
| YDR398W |        | 1.00 | -1.89 | -1.78 | -1.37 |

|         |       |      |       |       |       |
|---------|-------|------|-------|-------|-------|
| YNL142W | MEP2  | 1.00 | -1.90 | -1.45 | -1.37 |
| YKL083W |       | 1.00 | -2.07 | -1.35 | -1.37 |
| YBL112C |       | 1.00 | -2.08 | -1.30 | -1.37 |
| YDL238C |       | 1.00 | -2.11 | -1.78 | -1.37 |
| YDL204W |       | 1.00 | 1.44  | 1.11  | -1.38 |
| YEL059W |       | 1.00 | 1.29  | 1.85  | -1.38 |
| YBL078C | AUT7  | 1.00 | 1.12  | -1.21 | -1.38 |
| YNR036C |       | 1.00 | 1.03  | 1.02  | -1.38 |
| YKL100C |       | 1.00 | -1.01 | -1.04 | -1.38 |
| YPR141C | KAR3  | 1.00 | -1.04 | -1.17 | -1.38 |
| YDL139C | SCM3  | 1.00 | -1.05 | -1.39 | -1.38 |
| YGR077C | PEX8  | 1.00 | -1.07 | -1.45 | -1.38 |
| YDR509W |       | 1.00 | -1.12 | 1.11  | -1.38 |
| YLR191W | PEX13 | 1.00 | -1.13 | -1.34 | -1.38 |
| YDL187C |       | 1.00 | -1.16 | -1.41 | -1.38 |
| YLR290C |       | 1.00 | -1.19 | -1.21 | -1.38 |
| YPR042C | PUF2  | 1.00 | -1.20 | -1.36 | -1.38 |
| YCR064C |       | 1.00 | -1.22 | -1.28 | -1.38 |
| YDR156W | RPA14 | 1.00 | -1.22 | -1.09 | -1.38 |
| YLL058W |       | 1.00 | -1.25 | -1.47 | -1.38 |
| YOR358W | HAP5  | 1.00 | -1.25 | -1.35 | -1.38 |
| YIL113W |       | 1.00 | -1.26 | -1.24 | -1.38 |
| YOL041C | NOP12 | 1.00 | -1.26 | -1.32 | -1.38 |
| YOR080W | DIA2  | 1.00 | -1.27 | -1.29 | -1.38 |
| YGL201C | MCM6  | 1.00 | -1.32 | -1.24 | -1.38 |
| YDL173W |       | 1.00 | -1.33 | -1.33 | -1.38 |
| YKL101W | HSL1  | 1.00 | -1.34 | -1.43 | -1.38 |
| YOR378W |       | 1.00 | -1.37 | -1.31 | -1.38 |
| YGR235C |       | 1.00 | -1.39 | -1.01 | -1.38 |
| YGR281W | YOR1  | 1.00 | -1.40 | -1.48 | -1.38 |
| YIL029C |       | 1.00 | -1.44 | -1.29 | -1.38 |
| YLR382C | NAM2  | 1.00 | -1.45 | -1.24 | -1.38 |
| YPL009C |       | 1.00 | -1.52 | -1.30 | -1.38 |
| YDR484W | SAC2  | 1.00 | -1.57 | -1.40 | -1.38 |
| YNL020C | ARK1  | 1.00 | -1.58 | -1.41 | -1.38 |
| YDR056C |       | 1.00 | -1.59 | -1.45 | -1.38 |
| YOR105W |       | 1.00 | -1.64 | -1.43 | -1.38 |
| YOR219C | STE13 | 1.00 | -1.68 | -1.26 | -1.38 |
| YLR323C |       | 1.00 | -1.73 | -1.58 | -1.38 |
| YLR140W |       | 1.00 | -1.77 | -1.61 | -1.38 |
| YDR433W | KRE22 | 1.00 | -1.79 | -1.66 | -1.38 |
| YDL140C | RPO21 | 1.00 | -1.83 | -1.70 | -1.38 |
| YMR110C |       | 1.00 | 1.17  | 1.07  | -1.39 |
| YPR148C |       | 1.00 | 1.14  | 1.20  | -1.39 |
| YGR087C | PDC6  | 1.00 | 1.07  | 1.38  | -1.39 |
| YOL150C |       | 1.00 | -1.03 | -1.24 | -1.39 |
| YDR368W | YPR1  | 1.00 | -1.07 | -1.13 | -1.39 |
| YNL125C | ESBP6 | 1.00 | -1.09 | -1.29 | -1.39 |
| YGR016W |       | 1.00 | -1.11 | -1.29 | -1.39 |
| YKR055W | RHO4  | 1.00 | -1.11 | -1.23 | -1.39 |
| YIL158W |       | 1.00 | -1.13 | -1.25 | -1.39 |
| YLR072W |       | 1.00 | -1.15 | -1.21 | -1.39 |
| YGR109C | CLB6  | 1.00 | -1.16 | -1.24 | -1.39 |
| YNL097C | PHO23 | 1.00 | -1.18 | -1.35 | -1.39 |
| YML097C | VPS9  | 1.00 | -1.21 | -1.28 | -1.39 |
| YBR294W | SUL1  | 1.00 | -1.23 | -1.21 | -1.39 |
| YKL185W | ASH1  | 1.00 | -1.30 | -1.23 | -1.39 |
| YER119C |       | 1.00 | -1.31 | -1.35 | -1.39 |
| YML012W | ERV25 | 1.00 | -1.32 | -1.30 | -1.39 |
| YGR053C |       | 1.00 | -1.37 | -1.30 | -1.39 |
| YNL324W |       | 1.00 | -1.37 | -1.45 | -1.39 |



|         |        |      |       |       |       |
|---------|--------|------|-------|-------|-------|
| YDR386W | MUS81  | 1.00 | -1.38 | -1.39 | -1.39 |
| YKL171W |        | 1.00 | -1.43 | -1.18 | -1.39 |
| YKL038W | RGT1   | 1.00 | -1.47 | -1.38 | -1.39 |
| YLR450W | HMG2   | 1.00 | -1.48 | -1.37 | -1.39 |
| YIL084C | SDS3   | 1.00 | -1.52 | -1.41 | -1.39 |
| YJL178C |        | 1.00 | -1.53 | -1.45 | -1.39 |
| YDL233W |        | 1.00 | -1.59 | -1.17 | -1.39 |
| YDR388W | RVS167 | 1.00 | -1.79 | -1.46 | -1.39 |
| YFL050C | ALR2   | 1.00 | -1.84 | -1.28 | -1.39 |
| YDR384C |        | 1.00 | -2.64 | -1.95 | -1.39 |
| YNL315C | ATP11  | 1.00 | -1.09 | -1.23 | -1.40 |
| YIL100W |        | 1.00 | -1.10 | -1.39 | -1.40 |
| YKL196C | YKT6   | 1.00 | -1.13 | -1.26 | -1.40 |
| YBR241C |        | 1.00 | -1.15 | -1.33 | -1.40 |
| YDR031W |        | 1.00 | -1.16 | -1.46 | -1.40 |
| YBR128C | APG14  | 1.00 | -1.23 | -1.32 | -1.40 |
| YLR288C | MEC3   | 1.00 | -1.25 | -1.25 | -1.40 |
| YDR113C | PDS1   | 1.00 | -1.29 | -1.28 | -1.40 |
| YIL019W |        | 1.00 | -1.29 | -1.25 | -1.40 |
| YMR268C | PRP24  | 1.00 | -1.33 | -1.25 | -1.40 |
| YPR122W | AXL1   | 1.00 | -1.34 | -1.37 | -1.40 |
| YDR493W |        | 1.00 | -1.40 | -1.47 | -1.40 |
| YIL167W |        | 1.00 | -1.40 | -1.42 | -1.40 |
| YCR098C | GIT1   | 1.00 | -1.42 | -1.68 | -1.40 |
| YLR026C | SED5   | 1.00 | -1.42 | -1.47 | -1.40 |
| YNL024C |        | 1.00 | -1.42 | -1.47 | -1.40 |
| YPR189W | SKI3   | 1.00 | -1.50 | -1.60 | -1.40 |
| YBR109C | CMD1   | 1.00 | -1.53 | -1.86 | -1.40 |
| YCR043C |        | 1.00 | -1.54 | -1.35 | -1.40 |
| YJL024C | APS3   | 1.00 | -1.64 | -1.42 | -1.40 |
| YPR068C | HOS1   | 1.00 | -1.68 | -1.58 | -1.40 |
| YBR207W | FTH1   | 1.00 | -1.69 | -1.74 | -1.40 |
| YNL120C |        | 1.00 | -1.69 | -1.63 | -1.40 |
| YKL054C | VID31  | 1.00 | -1.72 | -1.59 | -1.40 |
| YJR051W | OSM1   | 1.00 | -3.40 | -1.65 | -1.40 |
| YPR124W | CTR1   | 1.00 | 1.05  | -1.03 | -1.41 |
| YKL138C | MRPL31 | 1.00 | 1.02  | -1.10 | -1.41 |
| YOL082W | CVT19  | 1.00 | -1.01 | -1.16 | -1.41 |
| YBL054W |        | 1.00 | -1.03 | -1.26 | -1.41 |
| YLR270W |        | 1.00 | -1.07 | -1.30 | -1.41 |
| YPL110C |        | 1.00 | -1.08 | -1.16 | -1.41 |
| YJL164C | TPK1   | 1.00 | -1.11 | -1.09 | -1.41 |
| YBR028C |        | 1.00 | -1.18 | -1.45 | -1.41 |
| YJR034W | PET191 | 1.00 | -1.20 | -1.39 | -1.41 |
| YBR022W |        | 1.00 | -1.23 | -1.47 | -1.41 |
| YJL022W |        | 1.00 | -1.26 | -1.19 | -1.41 |
| YJL107C |        | 1.00 | -1.28 | -1.40 | -1.41 |
| YKR070W |        | 1.00 | -1.31 | -1.24 | -1.41 |
| YML055W | SPC2   | 1.00 | -1.31 | -1.20 | -1.41 |
| YIL022W | TIM44  | 1.00 | -1.33 | -1.27 | -1.41 |
| YDR494W | RCT1   | 1.00 | -1.37 | -1.34 | -1.41 |
| YGL071W | RCS1   | 1.00 | -1.40 | -1.37 | -1.41 |
| YER002W |        | 1.00 | -1.44 | -1.31 | -1.41 |
| YJL184W |        | 1.00 | -1.44 | -1.42 | -1.41 |
| YOR245C | DGA1   | 1.00 | -1.44 | -1.40 | -1.41 |
| YHR085W |        | 1.00 | -1.45 | -1.65 | -1.41 |
| YAR035W | YAT1   | 1.00 | -1.50 | -1.57 | -1.41 |
| YDR208W | MSS4   | 1.00 | -1.52 | -1.52 | -1.41 |
| YLR235C |        | 1.00 | -1.56 | -1.49 | -1.41 |
| YDR107C |        | 1.00 | -1.59 | -1.52 | -1.41 |
| YGR294W |        | 1.00 | -1.67 | -1.32 | -1.41 |

|         |        |      |       |       |       |
|---------|--------|------|-------|-------|-------|
| YDR194C | MSS116 | 1.00 | -1.68 | -1.71 | -1.41 |
| YJL025W | RRN7   | 1.00 | -1.70 | -1.63 | -1.41 |
| YGR250C |        | 1.00 | -1.99 | -1.45 | -1.41 |
| YBL070C |        | 1.00 | -2.36 | -2.24 | -1.41 |
| YBR184W |        | 1.00 | -3.16 | -2.25 | -1.41 |
| YPL004C |        | 1.00 | 1.70  | 1.94  | -1.42 |
| YGR236C | SPG1   | 1.00 | 1.48  | -1.02 | -1.42 |
| YPL193W | RSA1   | 1.00 | 1.16  | 1.00  | -1.42 |
| YPR052C | NHP6A  | 1.00 | 1.03  | 1.03  | -1.42 |
| YCL033C |        | 1.00 | -1.03 | -1.35 | -1.42 |
| YCR107W | AAD3   | 1.00 | -1.04 | -1.11 | -1.42 |
| YMR157C |        | 1.00 | -1.07 | -1.24 | -1.42 |
| YIL098C | FMC1   | 1.00 | -1.11 | -1.21 | -1.42 |
| YMR293C |        | 1.00 | -1.15 | -1.49 | -1.42 |
| YDR491C |        | 1.00 | -1.22 | -1.09 | -1.42 |
| YLR295C | ATP14  | 1.00 | -1.24 | -1.07 | -1.42 |
| YNL121C | TOM70  | 1.00 | -1.26 | -1.41 | -1.42 |
| YER099C | PRS2   | 1.00 | -1.28 | -1.76 | -1.42 |
| YLR020C |        | 1.00 | -1.29 | -1.54 | -1.42 |
| YDL032W |        | 1.00 | -1.33 | -1.57 | -1.42 |
| YKL092C | BUD2   | 1.00 | -1.37 | -1.38 | -1.42 |
| YDR060W |        | 1.00 | -1.40 | -1.35 | -1.42 |
| YJL058C |        | 1.00 | -1.41 | -1.31 | -1.42 |
| YHR195W | NVJ1   | 1.00 | -1.43 | -1.61 | -1.42 |
| YJR133W | XPT1   | 1.00 | -1.47 | -1.70 | -1.42 |
| YBR235W |        | 1.00 | -1.48 | -1.43 | -1.42 |
| YPR067W | ISA2   | 1.00 | -1.58 | -1.36 | -1.42 |
| YJR037W |        | 1.00 | -1.70 | -1.83 | -1.42 |
| YDR008C |        | 1.00 | -1.71 | -1.57 | -1.42 |
| YAL056W | GPE2   | 1.00 | -1.73 | -1.77 | -1.42 |
| YDR483W | KRE2   | 1.00 | -1.74 | -1.44 | -1.42 |
| YHR110W | ERP5   | 1.00 | -1.76 | -1.59 | -1.42 |
| YMR158W |        | 1.00 | -1.82 | -1.41 | -1.42 |
| YER105C | NUP157 | 1.00 | -1.99 | -1.47 | -1.42 |
| YOR237W | HES1   | 1.00 | -2.01 | -1.51 | -1.42 |
| YNL171C |        | 1.00 | -2.04 | -1.54 | -1.42 |
| YNL077W |        | 1.00 | -2.06 | -1.68 | -1.42 |
| YCL042W |        | 1.00 | 1.38  | -1.11 | -1.43 |
| YHR126C |        | 1.00 | 1.10  | -1.24 | -1.43 |
| YIL157C |        | 1.00 | -1.07 | -1.21 | -1.43 |
| YJR108W | ABM1   | 1.00 | -1.11 | -1.20 | -1.43 |
| YPL114W |        | 1.00 | -1.14 | -1.31 | -1.43 |
| YOL114C |        | 1.00 | -1.15 | -1.26 | -1.43 |
| YCR076C |        | 1.00 | -1.16 | -1.17 | -1.43 |
| YMR257C | PET111 | 1.00 | -1.17 | -1.44 | -1.43 |
| YER128W |        | 1.00 | -1.18 | -1.27 | -1.43 |
| YLR417W | VPS36  | 1.00 | -1.18 | -1.48 | -1.43 |
| YBR114W | RAD16  | 1.00 | -1.20 | -1.29 | -1.43 |
| YPL189W | GUP2   | 1.00 | -1.31 | -1.31 | -1.43 |
| YML090W |        | 1.00 | -1.38 | -1.51 | -1.43 |
| YER142C | MAG1   | 1.00 | -1.40 | -1.34 | -1.43 |
| YGR187C | HGH1   | 1.00 | -1.46 | -1.55 | -1.43 |
| YKL183W | LOT5   | 1.00 | -1.47 | -1.48 | -1.43 |
| YOR254C | SEC63  | 1.00 | -1.48 | -1.63 | -1.43 |
| YER053C |        | 1.00 | -1.50 | -1.54 | -1.43 |
| YPL027W | SMA1   | 1.00 | -1.54 | -1.30 | -1.43 |
| YOR102W |        | 1.00 | -1.90 | -1.70 | -1.43 |
| YGL047W |        | 1.00 | -1.91 | -1.55 | -1.43 |
| YJR099W | YUH1   | 1.00 | -2.16 | -1.54 | -1.43 |
| YER138C |        | 1.00 | -2.19 | -2.21 | -1.43 |
| YJL133W | MRS3   | 1.00 | -2.19 | -1.35 | -1.43 |

|         |       |      |       |       |       |
|---------|-------|------|-------|-------|-------|
| YEL048C |       | 1.00 | 1.08  | 1.32  | -1.44 |
| YHR198C |       | 1.00 | -1.04 | -1.24 | -1.44 |
| YNL200C |       | 1.00 | -1.04 | -1.09 | -1.44 |
| YMR281W | GPI12 | 1.00 | -1.13 | -1.18 | -1.44 |
| YJR118C | ILM1  | 1.00 | -1.14 | -1.34 | -1.44 |
| YCL024W | KCC4  | 1.00 | -1.17 | -1.20 | -1.44 |
| YOR343C |       | 1.00 | -1.21 | -1.32 | -1.44 |
| YIL146C | ECM37 | 1.00 | -1.25 | -1.28 | -1.44 |
| YLR084C | RAX2  | 1.00 | -1.25 | -1.34 | -1.44 |
| YPL150W |       | 1.00 | -1.25 | -1.36 | -1.44 |
| YBL066C | SEF1  | 1.00 | -1.32 | -1.44 | -1.44 |
| YJL132W |       | 1.00 | -1.34 | -1.36 | -1.44 |
| YLR430W | SEN1  | 1.00 | -1.34 | -1.36 | -1.44 |
| YOR258W | HNT3  | 1.00 | -1.35 | -1.15 | -1.44 |
| YLR234W | TOP3  | 1.00 | -1.36 | -1.39 | -1.44 |
| YBR045C | GIP1  | 1.00 | -1.40 | -1.50 | -1.44 |
| YJR083C |       | 1.00 | -1.48 | -1.35 | -1.44 |
| YJL007C |       | 1.00 | -1.55 | -1.47 | -1.44 |
| YOR086C |       | 1.00 | -1.57 | -1.28 | -1.44 |
| YDR295C | PLO2  | 1.00 | -1.62 | -1.77 | -1.44 |
| YNL196C | SLZ1  | 1.00 | -1.66 | -1.69 | -1.44 |
| YEL076C |       | 1.00 | -1.75 | -1.43 | -1.44 |
| YGR019W | UGA1  | 1.00 | -1.82 | -1.25 | -1.44 |
| YER067W |       | 1.00 | 1.76  | 2.80  | -1.45 |
| YGR248W | SOL4  | 1.00 | 1.58  | 1.02  | -1.45 |
| YBL090W | MRP21 | 1.00 | 1.03  | -1.11 | -1.45 |
| YKL194C | MST1  | 1.00 | -1.10 | -1.19 | -1.45 |
| YNL045W |       | 1.00 | -1.11 | -1.10 | -1.45 |
| YMR139W | RIM11 | 1.00 | -1.14 | -1.19 | -1.45 |
| YOR281C | PLP2  | 1.00 | -1.21 | -1.67 | -1.45 |
| YNL137C | NAM9  | 1.00 | -1.27 | -1.24 | -1.45 |
| YNL318C | HXT14 | 1.00 | -1.29 | -1.34 | -1.45 |
| YDR104C | SPO71 | 1.00 | -1.31 | -1.36 | -1.45 |
| YOR064C | YNG1  | 1.00 | -1.32 | -1.56 | -1.45 |
| YDL019C | OSH2  | 1.00 | -1.33 | -1.16 | -1.45 |
| YMR168C | CEP3  | 1.00 | -1.34 | -1.71 | -1.45 |
| YJL120W |       | 1.00 | -1.37 | -1.43 | -1.45 |
| YFR007W |       | 1.00 | -1.41 | -1.32 | -1.45 |
| YGR291C |       | 1.00 | -1.57 | -1.53 | -1.45 |
| YLR280C |       | 1.00 | -1.63 | -1.37 | -1.45 |
| YDL244W | THI13 | 1.00 | -1.81 | -1.35 | -1.45 |
| YCR038C | BUD5  | 1.00 | -1.88 | -1.71 | -1.45 |
| YJR005W | APL1  | 1.00 | -2.11 | -1.63 | -1.45 |
| YER118C | SHO1  | 1.00 | -2.12 | -1.54 | -1.45 |
| YDR414C | ERD1  | 1.00 | -2.38 | -1.50 | -1.45 |
| YJL142C |       | 1.00 | 1.10  | 1.12  | -1.46 |
| YIL055C |       | 1.00 | 1.03  | -1.21 | -1.46 |
| YPR056W | TFB4  | 1.00 | -1.05 | -1.18 | -1.46 |
| YHR097C |       | 1.00 | -1.06 | 1.08  | -1.46 |
| YLR203C | MSS51 | 1.00 | -1.07 | -1.26 | -1.46 |
| YOR054C |       | 1.00 | -1.09 | -1.16 | -1.46 |
| YOR328W | PDR10 | 1.00 | -1.10 | -1.32 | -1.46 |
| YGR290W |       | 1.00 | -1.24 | -1.22 | -1.46 |
| YER180C | ISC10 | 1.00 | -1.25 | -1.36 | -1.46 |
| YLR399C | BDF1  | 1.00 | -1.26 | -1.50 | -1.46 |
| YGR045C |       | 1.00 | -1.31 | -1.26 | -1.46 |
| YGL155W | CDC43 | 1.00 | -1.34 | -1.27 | -1.46 |
| YPR021C |       | 1.00 | -1.34 | -1.31 | -1.46 |
| YJR097W |       | 1.00 | -1.36 | -1.45 | -1.46 |
| YPL121C | MEI5  | 1.00 | -1.38 | -1.34 | -1.46 |
| YKR029C |       | 1.00 | -1.39 | -1.38 | -1.46 |

|         |        |      |       |       |       |
|---------|--------|------|-------|-------|-------|
| YBR208C | DUR1,2 | 1.00 | -1.42 | -1.90 | -1.46 |
| YIL065C | FIS1   | 1.00 | -1.42 | -1.40 | -1.46 |
| YHR056C | RSC30  | 1.00 | -1.43 | -1.29 | -1.46 |
| YNL011C |        | 1.00 | -1.43 | -1.37 | -1.46 |
| YKL119C | VPH2   | 1.00 | -1.47 | -1.51 | -1.46 |
| YKR041W |        | 1.00 | -1.50 | -1.45 | -1.46 |
| YIL031W | ULP2   | 1.00 | -1.51 | -1.34 | -1.46 |
| YLR047C |        | 1.00 | -1.52 | -1.65 | -1.46 |
| YDR327W |        | 1.00 | -1.79 | -1.13 | -1.46 |
| YER082C | KRE31  | 1.00 | -1.80 | -1.83 | -1.46 |
| YKL047W |        | 1.00 | -2.01 | -1.65 | -1.46 |
| YNL264C | PDR17  | 1.00 | -2.01 | -1.87 | -1.46 |
| YER040W | GLN3   | 1.00 | -2.08 | -1.90 | -1.46 |
| YLR395C | COX8   | 1.00 | -1.05 | -1.19 | -1.47 |
| YHR164C | DNA2   | 1.00 | -1.09 | -1.19 | -1.47 |
| YFL024C | EPL1   | 1.00 | -1.15 | -1.43 | -1.47 |
| YLR423C | APG17  | 1.00 | -1.15 | -1.20 | -1.47 |
| YKL137W |        | 1.00 | -1.18 | -1.25 | -1.47 |
| YAR019C | CDC15  | 1.00 | -1.24 | -1.32 | -1.47 |
| YHR137W | ARO9   | 1.00 | -1.34 | -1.31 | -1.47 |
| YOR124C | UBP2   | 1.00 | -1.37 | -1.42 | -1.47 |
| YDR316W |        | 1.00 | -1.49 | -1.48 | -1.47 |
| YOR138C |        | 1.00 | -1.54 | -1.34 | -1.47 |
| YBR293W |        | 1.00 | -1.76 | -2.24 | -1.47 |
| YKL178C | STE3   | 1.00 | -1.77 | -1.36 | -1.47 |
| YNL076W | MKS1   | 1.00 | -1.86 | -1.72 | -1.47 |
| YDR059C | UBC5   | 1.00 | -2.10 | -1.64 | -1.47 |
| YJR063W | RPA12  | 1.00 | -2.10 | -1.71 | -1.47 |
| YKL058W | TOA2   | 1.00 | -2.31 | -1.91 | -1.47 |
| YDR371W |        | 1.00 | -1.11 | 1.07  | -1.48 |
| YCL064C | CHA1   | 1.00 | -1.13 | -1.34 | -1.48 |
| YOR324C |        | 1.00 | -1.18 | -1.41 | -1.48 |
| YDR016C | DAD1   | 1.00 | -1.19 | -1.35 | -1.48 |
| YIL088C |        | 1.00 | -1.24 | -1.19 | -1.48 |
| YCR032W | BPH1   | 1.00 | -1.27 | -1.43 | -1.48 |
| YGL088W |        | 1.00 | -1.27 | -1.31 | -1.48 |
| YJL102W | MEF2   | 1.00 | -1.28 | -1.41 | -1.48 |
| YDR498C | SEC20  | 1.00 | -1.29 | -1.47 | -1.48 |
| YGR247W |        | 1.00 | -1.30 | -1.17 | -1.48 |
| YMR178W |        | 1.00 | -1.33 | -1.28 | -1.48 |
| YGR023W | MTL1   | 1.00 | -1.41 | -1.14 | -1.48 |
| YPR045C |        | 1.00 | -1.46 | -1.45 | -1.48 |
| YAR068W |        | 1.00 | -1.47 | -1.62 | -1.48 |
| YMR047C | NUP116 | 1.00 | -1.48 | -1.62 | -1.48 |
| YEL065W | SIT1   | 1.00 | -1.68 | -1.39 | -1.48 |
| YKL057C | NUP120 | 1.00 | -1.71 | -1.66 | -1.48 |
| YLR116W | MSL5   | 1.00 | -2.00 | -1.46 | -1.48 |
| YNL194C |        | 1.00 | 1.40  | 1.23  | -1.49 |
| YPR001W | CIT3   | 1.00 | -1.08 | -1.42 | -1.49 |
| YJL068C |        | 1.00 | -1.16 | -1.13 | -1.49 |
| YLL059C |        | 1.00 | -1.20 | -1.49 | -1.49 |
| YIL070C | MAM33  | 1.00 | -1.22 | -1.16 | -1.49 |
| YMR141C |        | 1.00 | -1.22 | -1.27 | -1.49 |
| YER030W |        | 1.00 | -1.27 | -1.05 | -1.49 |
| YGR238C | KEL2   | 1.00 | -1.30 | -1.29 | -1.49 |
| YJR045C | SSC1   | 1.00 | -1.30 | -1.23 | -1.49 |
| YPR003C |        | 1.00 | -1.32 | -1.34 | -1.49 |
| YDR214W |        | 1.00 | -1.33 | -1.44 | -1.49 |
| YIL007C |        | 1.00 | -1.35 | -1.52 | -1.49 |
| YER071C |        | 1.00 | -1.39 | -1.48 | -1.49 |
| YKL073W | LHS1   | 1.00 | -1.39 | -1.50 | -1.49 |

|         |        |      |       |       |       |
|---------|--------|------|-------|-------|-------|
| YLL002W | REM50  | 1.00 | -1.40 | -1.26 | -1.49 |
| YLR008C |        | 1.00 | -1.42 | -1.63 | -1.49 |
| YCR094W | CDC50  | 1.00 | -1.44 | -1.75 | -1.49 |
| YML092C | PRE8   | 1.00 | -1.47 | -1.79 | -1.49 |
| YDR283C | GCN2   | 1.00 | -1.50 | -1.77 | -1.49 |
| YIL174W |        | 1.00 | -1.53 | -1.36 | -1.49 |
| YDL149W | APG9   | 1.00 | -1.57 | -1.36 | -1.49 |
| YPL170W |        | 1.00 | -1.57 | -1.63 | -1.49 |
| YGR031W |        | 1.00 | -1.65 | -1.38 | -1.49 |
| YGR030C | POP6   | 1.00 | -1.71 | -1.76 | -1.49 |
| YGR017W |        | 1.00 | -1.72 | -1.44 | -1.49 |
| YGR198W |        | 1.00 | -1.81 | -1.27 | -1.49 |
| YNL012W | SPO1   | 1.00 | -1.88 | -1.60 | -1.49 |
| YNL172W | APC1   | 1.00 | -2.48 | -1.90 | -1.49 |
| YIL160C | POT1   | 1.00 | 1.15  | -1.23 | -1.50 |
| YKL163W | PIR3   | 1.00 | 1.10  | 1.30  | -1.50 |
| YCR071C | IMG2   | 1.00 | 1.02  | -1.04 | -1.50 |
| YIR037W | HYR1   | 1.00 | -1.06 | -1.20 | -1.50 |
| YJL070C |        | 1.00 | -1.10 | -1.24 | -1.50 |
| YJL095W | BCK1   | 1.00 | -1.12 | -1.46 | -1.50 |
| YMR162C |        | 1.00 | -1.19 | -1.49 | -1.50 |
| YOR373W | NUD1   | 1.00 | -1.20 | -1.44 | -1.50 |
| YIL066C | RNR3   | 1.00 | -1.30 | -1.54 | -1.50 |
| YBR023C | CHS3   | 1.00 | -1.36 | -1.67 | -1.50 |
| YPL005W |        | 1.00 | -1.39 | -1.56 | -1.50 |
| YJL156C | SSY5   | 1.00 | -1.42 | -1.63 | -1.50 |
| YKL203C | TOR2   | 1.00 | -1.46 | -1.38 | -1.50 |
| YKL007W | CAP1   | 1.00 | -1.48 | -1.29 | -1.50 |
| YLR451W | LEU3   | 1.00 | -1.50 | -1.86 | -1.50 |
| YIR002C | MPH1   | 1.00 | -1.54 | -1.30 | -1.50 |
| YDR435C | PPM1   | 1.00 | -1.61 | -1.40 | -1.50 |
| YLL037W |        | 1.00 | -1.85 | -1.67 | -1.50 |
| YKL202W |        | 1.00 | -1.93 | -1.78 | -1.50 |
| YDR425W |        | 1.00 | -2.02 | -1.60 | -1.50 |
| YEL014C |        | 1.00 | 1.08  | -1.07 | -1.51 |
| YER134C |        | 1.00 | 1.05  | 1.11  | -1.51 |
| YNL284C | MRPL10 | 1.00 | -1.01 | -1.31 | -1.51 |
| YOR055W |        | 1.00 | -1.13 | -1.17 | -1.51 |
| YAL049C |        | 1.00 | -1.17 | -1.13 | -1.51 |
| YOR394W |        | 1.00 | -1.21 | -1.17 | -1.51 |
| YPR140W |        | 1.00 | -1.21 | -1.12 | -1.51 |
| YJR067C | YAE1   | 1.00 | -1.23 | -1.45 | -1.51 |
| YER162C | RAD4   | 1.00 | -1.35 | -1.31 | -1.51 |
| YJR060W | CBF1   | 1.00 | -1.35 | -1.47 | -1.51 |
| YLR013W | GAT3   | 1.00 | -1.39 | -1.66 | -1.51 |
| YDR009W | GAL3   | 1.00 | -1.40 | -1.41 | -1.51 |
| YOR137C |        | 1.00 | -1.43 | -1.42 | -1.51 |
| YLR406C | RPL31B | 1.00 | -1.45 | -1.47 | -1.51 |
| YOL101C |        | 1.00 | -1.47 | -1.47 | -1.51 |
| YDR207C | UME6   | 1.00 | -1.55 | -1.77 | -1.51 |
| YLR141W | RRN5   | 1.00 | -1.57 | -1.55 | -1.51 |
| YGR199W | PMT6   | 1.00 | -1.62 | -1.96 | -1.51 |
| YFR047C |        | 1.00 | -1.63 | -1.59 | -1.51 |
| YLR107W | REX3   | 1.00 | -1.83 | -1.58 | -1.51 |
| YGR173W |        | 1.00 | -1.87 | -1.69 | -1.51 |
| YDR204W | COQ4   | 1.00 | -2.61 | -1.83 | -1.51 |
| YOR120W | GCY1   | 1.00 | 1.03  | -1.13 | -1.52 |
| YJL067W |        | 1.00 | -1.07 | -1.35 | -1.52 |
| YNL128W | TEP1   | 1.00 | -1.17 | -1.33 | -1.52 |
| YAL062W | GDH3   | 1.00 | -1.19 | -1.27 | -1.52 |
| YDL107W | MSS2   | 1.00 | -1.22 | -1.36 | -1.52 |

|         |           |      |       |       |       |
|---------|-----------|------|-------|-------|-------|
| YMR187C |           | 1.00 | -1.22 | -1.42 | -1.52 |
| YGL094C | PAN2      | 1.00 | -1.25 | -1.25 | -1.52 |
| YGL165C |           | 1.00 | -1.33 | -1.35 | -1.52 |
| YOR315W |           | 1.00 | -1.35 | -1.60 | -1.52 |
| YLR146C | SPE4      | 1.00 | -1.36 | -1.50 | -1.52 |
| YOR041C |           | 1.00 | -1.36 | -1.26 | -1.52 |
| YNL139C | RLR1      | 1.00 | -1.37 | -1.27 | -1.52 |
| YKL204W | EAP1      | 1.00 | -1.44 | -1.23 | -1.52 |
| YOR255W |           | 1.00 | -1.44 | -1.31 | -1.52 |
| YKL221W |           | 1.00 | -1.49 | -1.50 | -1.52 |
| YFL051C |           | 1.00 | -1.52 | -1.37 | -1.52 |
| YBL017C | PEP1      | 1.00 | -1.56 | -1.61 | -1.52 |
| YCR040W | MATALPHA1 | 1.00 | -1.56 | -1.78 | -1.52 |
| YOR180C | DCI1      | 1.00 | -1.56 | -1.38 | -1.52 |
| YCL074W |           | 1.00 | -1.59 | -1.38 | -1.52 |
| YAR009C |           | 1.00 | -1.60 | -1.15 | -1.52 |
| YDR154C |           | 1.00 | -1.60 | -1.56 | -1.52 |
| YLL019C | KNS1      | 1.00 | -1.60 | -1.12 | -1.52 |
| YDR195W | REF2      | 1.00 | -1.63 | -1.81 | -1.52 |
| YLR306W | UBC12     | 1.00 | -1.64 | -1.33 | -1.52 |
| YDR383C |           | 1.00 | -1.65 | -1.36 | -1.52 |
| YDR093W |           | 1.00 | -1.69 | -1.66 | -1.52 |
| YOL148C | SPT20     | 1.00 | -1.72 | -1.61 | -1.52 |
| YGR224W | AZR1      | 1.00 | -1.74 | -1.78 | -1.52 |
| YLR012C |           | 1.00 | -1.74 | -1.73 | -1.52 |
| YNL197C | WHI3      | 1.00 | -1.99 | -1.95 | -1.52 |
| YKR026C | GCN3      | 1.00 | -2.14 | -1.76 | -1.52 |
| YDR387C |           | 1.00 | -2.16 | -1.93 | -1.52 |
| YAL041W | CDC24     | 1.00 | -2.29 | -1.50 | -1.52 |
| YDR086C | SSS1      | 1.00 | 1.04  | -1.17 | -1.53 |
| YPL236C |           | 1.00 | -1.20 | -1.35 | -1.53 |
| YPL118W | MRP51     | 1.00 | -1.21 | -1.41 | -1.53 |
| YIL111W | COX5B     | 1.00 | -1.24 | -1.15 | -1.53 |
| YKL003C | MRP17     | 1.00 | -1.25 | -1.41 | -1.53 |
| YIL097W | FYV10     | 1.00 | -1.26 | -1.38 | -1.53 |
| YOR257W | CDC31     | 1.00 | -1.27 | -1.39 | -1.53 |
| YJL096W | MRPL49    | 1.00 | -1.32 | -1.40 | -1.53 |
| YMR287C | MSU1      | 1.00 | -1.33 | -1.19 | -1.53 |
| YCR087W |           | 1.00 | -1.43 | -1.64 | -1.53 |
| YMR057C |           | 1.00 | -1.43 | -1.60 | -1.53 |
| YNL199C | GCR2      | 1.00 | -1.45 | -1.46 | -1.53 |
| YDR308C | SRB7      | 1.00 | -1.47 | -1.78 | -1.53 |
| YIR015W | RPR2      | 1.00 | -1.48 | -1.52 | -1.53 |
| YKL123W |           | 1.00 | -1.50 | -1.45 | -1.53 |
| YMR052W | FAR3      | 1.00 | -1.54 | -1.37 | -1.53 |
| YMR190C | SGS1      | 1.00 | -1.60 | -1.53 | -1.53 |
| YDR117C |           | 1.00 | -1.63 | -1.48 | -1.53 |
| YOL134C |           | 1.00 | -1.63 | -1.62 | -1.53 |
| YDR127W | ARO1      | 1.00 | -1.75 | -1.89 | -1.53 |
| YKR093W | PTR2      | 1.00 | -1.88 | -2.01 | -1.53 |
| YPR184W | GDB1      | 1.00 | 1.71  | 1.21  | -1.54 |
| YBR117C | TKL2      | 1.00 | 1.30  | -1.37 | -1.54 |
| YDL004W | ATP16     | 1.00 | 1.21  | 1.01  | -1.54 |
| YLR202C |           | 1.00 | -1.16 | -1.43 | -1.54 |
| YPR070W | MED1      | 1.00 | -1.16 | -1.38 | -1.54 |
| YDL234C | GYP7      | 1.00 | -1.23 | -1.08 | -1.54 |
| YFR013W | IOC3      | 1.00 | -1.26 | -1.49 | -1.54 |
| YJL112W | MDV1      | 1.00 | -1.28 | -1.39 | -1.54 |
| YGR015C |           | 1.00 | -1.31 | -1.44 | -1.54 |
| YGR194C | XKS1      | 1.00 | -1.35 | -1.61 | -1.54 |
| YIL064W |           | 1.00 | -1.39 | -1.65 | -1.54 |



|         |        |      |       |       |       |
|---------|--------|------|-------|-------|-------|
| YLR142W | PUT1   | 1.00 | -1.47 | -1.38 | -1.54 |
| YNL028W |        | 1.00 | -1.61 | -1.55 | -1.54 |
| YJR093C | FIP1   | 1.00 | -1.66 | -1.64 | -1.54 |
| YOR282W |        | 1.00 | -1.81 | -1.64 | -1.54 |
| YDR215C |        | 1.00 | -2.49 | -2.23 | -1.54 |
| YDR510W | SMT3   | 1.00 | -2.64 | -1.59 | -1.54 |
| YEL011W | GLC3   | 1.00 | 1.52  | 2.17  | -1.55 |
| YPL061W | ALD6   | 1.00 | 1.46  | 2.22  | -1.55 |
| YGR183C | QCR9   | 1.00 | 1.05  | 1.21  | -1.55 |
| YKR076W | ECM4   | 1.00 | -1.13 | -1.11 | -1.55 |
| YER182W |        | 1.00 | -1.16 | -1.28 | -1.55 |
| YPL216W |        | 1.00 | -1.28 | -1.37 | -1.55 |
| YIL089W |        | 1.00 | -1.29 | -1.44 | -1.55 |
| YNL023C | FAP1   | 1.00 | -1.35 | -1.46 | -1.55 |
| YLR305C | STT4   | 1.00 | -1.49 | -1.44 | -1.55 |
| YBR151W | APD1   | 1.00 | -1.65 | -1.60 | -1.55 |
| YMR160W |        | 1.00 | -1.94 | -2.10 | -1.55 |
| YMR209C |        | 1.00 | -2.10 | -1.88 | -1.55 |
| YMR261C | TPS3   | 1.00 | -1.07 | -1.30 | -1.56 |
| YEL067C |        | 1.00 | -1.19 | -1.29 | -1.56 |
| YIR027C | DAL1   | 1.00 | -1.19 | -1.29 | -1.56 |
| YKL121W |        | 1.00 | -1.27 | -1.20 | -1.56 |
| YLR122C |        | 1.00 | -1.27 | -1.58 | -1.56 |
| YDR203W |        | 1.00 | -1.28 | -1.13 | -1.56 |
| YDR219C |        | 1.00 | -1.34 | -1.41 | -1.56 |
| YDR462W | MRPL28 | 1.00 | -1.35 | -1.30 | -1.56 |
| YKR062W | TFA2   | 1.00 | -1.35 | -1.32 | -1.56 |
| YLR206W | ENT2   | 1.00 | -1.37 | -1.22 | -1.56 |
| YGL075C | MPS2   | 1.00 | -1.46 | -1.40 | -1.56 |
| YOR285W |        | 1.00 | 1.23  | 1.10  | -1.57 |
| YBR026C | MRF1'  | 1.00 | 1.02  | -1.44 | -1.57 |
| YNL009W | IDP3   | 1.00 | -1.01 | -1.23 | -1.57 |
| YAL055W | PEX22  | 1.00 | -1.04 | -1.43 | -1.57 |
| YFL019C |        | 1.00 | -1.12 | -1.21 | -1.57 |
| YJR096W |        | 1.00 | -1.23 | -1.48 | -1.57 |
| YGL143C | MRF1   | 1.00 | -1.28 | -1.33 | -1.57 |
| YIR003W |        | 1.00 | -1.32 | -1.22 | -1.57 |
| YLR433C | CNA1   | 1.00 | -1.36 | -1.37 | -1.57 |
| YKR088C |        | 1.00 | -1.44 | -1.23 | -1.57 |
| YOL071W |        | 1.00 | -1.66 | -1.48 | -1.57 |
| YOR188W | MSB1   | 1.00 | -1.66 | -1.50 | -1.57 |
| YKR053C | YSR3   | 1.00 | -1.86 | -1.57 | -1.57 |
| YGR256W | GND2   | 1.00 | 1.23  | -1.10 | -1.58 |
| YCL028W | RNQ1   | 1.00 | 1.11  | -1.33 | -1.58 |
| YDL172C |        | 1.00 | -1.10 | -1.18 | -1.58 |
| YGR156W | PTI1   | 1.00 | -1.16 | -1.40 | -1.58 |
| YIL087C |        | 1.00 | -1.20 | -1.19 | -1.58 |
| YGL237C | HAP2   | 1.00 | -1.26 | -1.24 | -1.58 |
| YGR021W |        | 1.00 | -1.30 | -1.32 | -1.58 |
| YKL108W | SLD2   | 1.00 | -1.30 | -1.28 | -1.58 |
| YGR039W |        | 1.00 | -1.37 | -1.59 | -1.58 |
| YLR364W |        | 1.00 | -1.41 | -1.68 | -1.58 |
| YML043C | RRN11  | 1.00 | -1.47 | -1.11 | -1.58 |
| YKL102C |        | 1.00 | -1.50 | -1.61 | -1.58 |
| YLR092W | SUL2   | 1.00 | -1.55 | -1.69 | -1.58 |
| YJL153C | INO1   | 1.00 | -1.60 | -1.72 | -1.58 |
| YMR156C | TPP1   | 1.00 | -1.68 | -1.44 | -1.58 |
| YKL115C |        | 1.00 | -1.99 | -1.69 | -1.58 |
| YNL184C |        | 1.00 | -2.24 | -2.00 | -1.58 |
| YJR039W |        | 1.00 | -2.29 | -1.89 | -1.58 |
| YGR070W | ROM1   | 1.00 | -1.06 | -1.52 | -1.59 |

|         |        |      |       |       |       |
|---------|--------|------|-------|-------|-------|
| YMR284W | YKU70  | 1.00 | -1.22 | -1.44 | -1.59 |
| YJR074W | MOG1   | 1.00 | -1.25 | -1.58 | -1.59 |
| YOR163W | DDP1   | 1.00 | -1.26 | -1.26 | -1.59 |
| YOR333C |        | 1.00 | -1.26 | -1.57 | -1.59 |
| YLR097C |        | 1.00 | -1.28 | -1.47 | -1.59 |
| YDR136C |        | 1.00 | -1.30 | -1.46 | -1.59 |
| YLL027W | ISA1   | 1.00 | -1.30 | -1.40 | -1.59 |
| YMR048W | CSM3   | 1.00 | -1.38 | -1.46 | -1.59 |
| YMR282C | AEP2   | 1.00 | -1.43 | -1.40 | -1.59 |
| YMR071C |        | 1.00 | -1.70 | -1.38 | -1.59 |
| YHR034C |        | 1.00 | -1.84 | -1.74 | -1.59 |
| YLR426W |        | 1.00 | -1.85 | -1.71 | -1.59 |
| YFR033C | QCR6   | 1.00 | 1.28  | 1.12  | -1.60 |
| YKL016C | ATP7   | 1.00 | 1.22  | 1.16  | -1.60 |
| YNL211C |        | 1.00 | -1.13 | -1.22 | -1.60 |
| YGR004W |        | 1.00 | -1.24 | -1.12 | -1.60 |
| YJR132W | NMD5   | 1.00 | -1.26 | -1.19 | -1.60 |
| YKR010C | TOF2   | 1.00 | -1.27 | -1.67 | -1.60 |
| YJR151C | DAN4   | 1.00 | -1.33 | -1.62 | -1.60 |
| YOR125C | CAT5   | 1.00 | -1.35 | -1.39 | -1.60 |
| YOR150W | MRPL23 | 1.00 | -1.35 | -1.40 | -1.60 |
| YJL094C | KHA1   | 1.00 | -1.37 | -1.44 | -1.60 |
| YGR099W | TEL2   | 1.00 | -1.39 | -1.49 | -1.60 |
| YBR234C | ARC40  | 1.00 | -1.41 | -1.60 | -1.60 |
| YGR060W | ERG25  | 1.00 | -1.41 | -1.28 | -1.60 |
| YKL113C | RAD27  | 1.00 | -1.48 | -1.47 | -1.60 |
| YDR296W | MHR1   | 1.00 | -1.49 | -1.45 | -1.60 |
| YJL137C | GLG2   | 1.00 | -1.52 | -1.64 | -1.60 |
| YER152C |        | 1.00 | -1.55 | -1.18 | -1.60 |
| YDR054C | CDC34  | 1.00 | -1.70 | -1.39 | -1.60 |
| YJR159W | SOR1   | 1.00 | -1.80 | -1.76 | -1.60 |
| YGL257C | MNT2   | 1.00 | -1.81 | -1.97 | -1.60 |
| YBR067C | TIP1   | 1.00 | -2.15 | -1.94 | -1.60 |
| YKL224C |        | 1.00 | -2.47 | -2.00 | -1.60 |
| YNR016C | ACC1   | 1.00 | -3.04 | -1.83 | -1.60 |
| YER171W | RAD3   | 1.00 | -1.28 | -1.44 | -1.61 |
| YER141W | COX15  | 1.00 | -1.41 | -1.41 | -1.61 |
| YBR210W |        | 1.00 | -1.46 | -1.59 | -1.61 |
| YIL168W | SDL1   | 1.00 | -1.49 | -1.60 | -1.61 |
| YDR175C | RSM24  | 1.00 | -1.51 | -1.49 | -1.61 |
| YPR016C | TIF6   | 1.00 | -1.52 | -1.71 | -1.61 |
| YJR156C | THI11  | 1.00 | -1.55 | -1.60 | -1.61 |
| YIL126W | STH1   | 1.00 | -1.57 | -1.71 | -1.61 |
| YNL173C | MDG1   | 1.00 | -1.64 | -1.34 | -1.61 |
| YCL041C |        | 1.00 | -1.75 | -1.49 | -1.61 |
| YKR002W | PAP1   | 1.00 | -1.79 | -1.98 | -1.61 |
| YHR121W |        | 1.00 | -1.91 | -1.51 | -1.61 |
| YJL181W |        | 1.00 | -2.05 | -2.05 | -1.61 |
| YJR142W |        | 1.00 | -2.23 | -1.63 | -1.61 |
| YKL118W |        | 1.00 | -2.51 | -1.83 | -1.61 |
| YDL181W | INH1   | 1.00 | 1.04  | 1.01  | -1.62 |
| YDR196C |        | 1.00 | -1.13 | -1.18 | -1.62 |
| YDL016C |        | 1.00 | -1.30 | -1.49 | -1.62 |
| YER091C | MET6   | 1.00 | -1.31 | 1.14  | -1.62 |
| YBR209W |        | 1.00 | -1.32 | -1.67 | -1.62 |
| YMR266W | RSN1   | 1.00 | -1.34 | -1.62 | -1.62 |
| YJL176C | SWI3   | 1.00 | -1.35 | -1.67 | -1.62 |
| YJL081C | ARP4   | 1.00 | -1.36 | -1.38 | -1.62 |
| YPL200W | CSM4   | 1.00 | -1.39 | -1.64 | -1.62 |
| YER085C |        | 1.00 | -1.48 | -1.79 | -1.62 |
| YIR036C |        | 1.00 | -1.50 | -1.27 | -1.62 |

|         |        |      |       |       |       |
|---------|--------|------|-------|-------|-------|
| YFL056C | AAD6   | 1.00 | -1.60 | -1.26 | -1.62 |
| YML061C | PIF1   | 1.00 | -1.62 | -1.74 | -1.62 |
| YMR233W |        | 1.00 | -1.62 | -1.48 | -1.62 |
| YLR024C | UBR2   | 1.00 | -1.64 | -1.69 | -1.62 |
| YDL135C | RDI1   | 1.00 | -1.69 | -1.38 | -1.62 |
| YLR384C | IKI3   | 1.00 | -1.69 | -1.97 | -1.62 |
| YDR168W | CDC37  | 1.00 | -1.79 | -1.38 | -1.62 |
| YCL032W | STE50  | 1.00 | -1.90 | -1.89 | -1.62 |
| YOR339C | UBC11  | 1.00 | -2.03 | -2.00 | -1.62 |
| YHR109W | CTM1   | 1.00 | -2.30 | -1.60 | -1.62 |
| YJL145W |        | 1.00 | -2.45 | -1.73 | -1.62 |
| YPR149W | NCE102 | 1.00 | 1.27  | 1.03  | -1.63 |
| YDL044C | MTF2   | 1.00 | 1.26  | -1.39 | -1.63 |
| YAL063C | FLO9   | 1.00 | -1.06 | -1.15 | -1.63 |
| YPL153C | RAD53  | 1.00 | -1.16 | -1.44 | -1.63 |
| YNL133C | FYV6   | 1.00 | -1.17 | -1.55 | -1.63 |
| YOR142W | LSC1   | 1.00 | -1.38 | -1.40 | -1.63 |
| YJL202C |        | 1.00 | -1.40 | -1.53 | -1.63 |
| YJL215C |        | 1.00 | -1.48 | -1.65 | -1.63 |
| YJR087W |        | 1.00 | -1.51 | -1.58 | -1.63 |
| YOR038C | HIR2   | 1.00 | -1.55 | -1.71 | -1.63 |
| YDR095C |        | 1.00 | -1.62 | -1.51 | -1.63 |
| YOL110W | SHR5   | 1.00 | -1.72 | -1.69 | -1.63 |
| YLR289W | GUF1   | 1.00 | -1.73 | -1.47 | -1.63 |
| YKL087C | CYT2   | 1.00 | -1.77 | -1.56 | -1.63 |
| YML122C |        | 1.00 | -1.78 | -1.50 | -1.63 |
| YER054C | GIP2   | 1.00 | -2.00 | -1.73 | -1.63 |
| YKR040C |        | 1.00 | -2.27 | -1.85 | -1.63 |
| YKR067W | GPT2   | 1.00 | 1.03  | -1.27 | -1.64 |
| YJL163C |        | 1.00 | -1.30 | -1.44 | -1.64 |
| YKR090W |        | 1.00 | -1.40 | -1.51 | -1.64 |
| YPR047W | MSF1   | 1.00 | -1.40 | -1.36 | -1.64 |
| YIL099W | SGA1   | 1.00 | -1.51 | -1.61 | -1.64 |
| YOR359W |        | 1.00 | -1.59 | -1.61 | -1.64 |
| YPR097W |        | 1.00 | -1.67 | -1.68 | -1.64 |
| YDR103W | STE5   | 1.00 | -1.70 | -1.90 | -1.64 |
| YMR070W | MOT3   | 1.00 | -1.72 | -1.75 | -1.64 |
| YKR012C |        | 1.00 | -1.78 | -1.68 | -1.64 |
| YLR400W |        | 1.00 | -1.79 | -1.44 | -1.64 |
| YER033C | ZRG8   | 1.00 | -1.81 | -1.89 | -1.64 |
| YDR150W | NUM1   | 1.00 | -2.02 | -1.78 | -1.64 |
| YHR038W | FIL1   | 1.00 | -2.05 | -1.54 | -1.64 |
| YNL130C | CPT1   | 1.00 | 1.06  | -1.21 | -1.65 |
| YMR083W | ADH3   | 1.00 | -1.15 | -1.15 | -1.65 |
| YLR315W |        | 1.00 | -1.29 | -1.65 | -1.65 |
| YJL214W | HXT8   | 1.00 | -1.32 | -1.37 | -1.65 |
| YML034W | SRC1   | 1.00 | -1.41 | -1.41 | -1.65 |
| YKL220C | FRE2   | 1.00 | -1.56 | -1.54 | -1.65 |
| YML027W | YOX1   | 1.00 | -1.58 | -1.66 | -1.65 |
| YBR280C |        | 1.00 | -1.61 | -1.97 | -1.65 |
| YOR029W |        | 1.00 | -1.74 | -1.61 | -1.65 |
| YGR068C |        | 1.00 | -1.75 | -1.68 | -1.65 |
| YLR046C |        | 1.00 | -1.78 | -1.79 | -1.65 |
| YOR233W | KIN4   | 1.00 | -1.80 | -1.77 | -1.65 |
| YLR322W |        | 1.00 | -1.81 | -2.03 | -1.65 |
| YLR037C | DAN2   | 1.00 | -1.85 | -1.63 | -1.65 |
| YEL044W | IES6   | 1.00 | -2.44 | -2.06 | -1.65 |
| YFR016C |        | 1.00 | 1.00  | -1.26 | -1.66 |
| YNL055C | POR1   | 1.00 | -1.10 | -1.18 | -1.66 |
| YNL274C |        | 1.00 | -1.11 | -1.35 | -1.66 |
| YPL222W |        | 1.00 | -1.24 | -1.35 | -1.66 |

|         |       |      |       |       |       |
|---------|-------|------|-------|-------|-------|
| YOR082C |       | 1.00 | -1.50 | -1.56 | -1.66 |
| YBR132C | AGP2  | 1.00 | -1.51 | -1.53 | -1.66 |
| YFR048W |       | 1.00 | -1.56 | -1.70 | -1.66 |
| YGR293C |       | 1.00 | -1.56 | -1.57 | -1.66 |
| YHR098C | SFB3  | 1.00 | -1.74 | -1.91 | -1.66 |
| YGR181W | TIM13 | 1.00 | -2.06 | -1.77 | -1.66 |
| YCR004C | YCP4  | 1.00 | 1.31  | 1.02  | -1.67 |
| YLR049C |       | 1.00 | 1.31  | 1.42  | -1.67 |
| YFR017C |       | 1.00 | 1.13  | 1.14  | -1.67 |
| YPL209C | IPL1  | 1.00 | -1.10 | -1.54 | -1.67 |
| YCR010C | ADY2  | 1.00 | -1.14 | -1.55 | -1.67 |
| YER026C | CHO1  | 1.00 | -1.14 | -1.24 | -1.67 |
| YDR019C | GCV1  | 1.00 | -1.25 | -1.58 | -1.67 |
| YPR202W |       | 1.00 | -1.38 | -1.39 | -1.67 |
| YER179W | DMC1  | 1.00 | -1.40 | -1.41 | -1.67 |
| YML116W | ATR1  | 1.00 | -1.48 | -1.34 | -1.67 |
| YJR157W |       | 1.00 | -1.49 | -1.47 | -1.67 |
| YKR080W | MTD1  | 1.00 | -1.50 | -1.73 | -1.67 |
| YLR415C |       | 1.00 | -1.57 | -1.71 | -1.67 |
| YDR470C | UGO1  | 1.00 | -1.91 | -1.81 | -1.67 |
| YEL010W |       | 1.00 | -1.91 | -1.82 | -1.67 |
| YKL049C | CSE4  | 1.00 | -1.91 | -1.53 | -1.67 |
| YJR104C | SOD1  | 1.00 | 1.20  | 1.34  | -1.68 |
| YFL040W |       | 1.00 | -1.01 | 1.47  | -1.68 |
| YPR020W | ATP20 | 1.00 | -1.18 | -1.38 | -1.68 |
| YML037C |       | 1.00 | -1.34 | -1.89 | -1.68 |
| YMR149W | SWP1  | 1.00 | -1.38 | -1.39 | -1.68 |
| YJL168C | SET2  | 1.00 | -1.55 | -1.93 | -1.68 |
| YKR031C | SPO14 | 1.00 | -1.55 | -1.57 | -1.68 |
| YMR074C |       | 1.00 | -1.56 | -1.60 | -1.68 |
| YDR153C |       | 1.00 | -1.61 | -1.29 | -1.68 |
| YMR058W | FET3  | 1.00 | -1.66 | -1.90 | -1.68 |
| YBR220C |       | 1.00 | -1.78 | -1.65 | -1.68 |
| YLR324W |       | 1.00 | -1.86 | -1.53 | -1.68 |
| YDR078C |       | 1.00 | -1.93 | -1.87 | -1.68 |
| YMR250W | GAD1  | 1.00 | 1.48  | 1.02  | -1.69 |
| YNL242W | APG2  | 1.00 | 1.09  | -1.28 | -1.69 |
| YGR174C | CBP4  | 1.00 | -1.03 | -1.26 | -1.69 |
| YPL127C | HHO1  | 1.00 | -1.16 | -1.41 | -1.69 |
| YBR149W | ARA1  | 1.00 | -1.21 | -1.41 | -1.69 |
| YLL016W | SDC25 | 1.00 | -1.21 | -1.57 | -1.69 |
| YKL002W | DID4  | 1.00 | -1.38 | -1.50 | -1.69 |
| YJR094C | IME1  | 1.00 | -1.41 | -1.68 | -1.69 |
| YLR112W |       | 1.00 | -1.42 | -1.45 | -1.69 |
| YCL075W |       | 1.00 | -1.52 | -1.68 | -1.69 |
| YAL021C | CCR4  | 1.00 | -1.78 | -1.95 | -1.69 |
| YLR106C |       | 1.00 | -1.86 | -1.88 | -1.69 |
| YML002W |       | 1.00 | -1.86 | -1.51 | -1.69 |
| YKL080W | VMA5  | 1.00 | -1.93 | -1.98 | -1.69 |
| YGR014W | MSB2  | 1.00 | -2.11 | -1.77 | -1.69 |
| YKL128C | PMU1  | 1.00 | -2.24 | -2.24 | -1.69 |
| YHR087W |       | 1.00 | 1.82  | 1.44  | -1.70 |
| YAL061W |       | 1.00 | 1.07  | -1.31 | -1.70 |
| YDL078C | MDH3  | 1.00 | -1.02 | -1.23 | -1.70 |
| YPL147W | PXA1  | 1.00 | -1.07 | -1.39 | -1.70 |
| YMR181C |       | 1.00 | -1.08 | -1.36 | -1.70 |
| YPR123C |       | 1.00 | -1.23 | -1.29 | -1.70 |
| YPL006W | NCR1  | 1.00 | -1.27 | -1.82 | -1.70 |
| YJR150C | DAN1  | 1.00 | -1.31 | -1.65 | -1.70 |
| YGL236C | MTO1  | 1.00 | -1.37 | -1.69 | -1.70 |
| YDL101C | DUN1  | 1.00 | -1.40 | -1.40 | -1.70 |

|         |        |      |       |       |       |
|---------|--------|------|-------|-------|-------|
| YDR149C |        | 1.00 | -1.52 | -1.29 | -1.70 |
| YIL076W | SEC28  | 1.00 | -1.58 | -1.24 | -1.70 |
| YLR405W |        | 1.00 | -1.61 | -1.91 | -1.70 |
| YMR306W | FKS3   | 1.00 | -1.80 | -1.93 | -1.70 |
| YDR183W | PLP1   | 1.00 | -1.85 | -1.76 | -1.70 |
| YFR038W |        | 1.00 | -2.29 | -1.79 | -1.70 |
| YCR027C | RSG1   | 1.00 | -3.12 | -2.46 | -1.70 |
| YML054C | CYB2   | 1.00 | 1.10  | 1.19  | -1.71 |
| YOR065W | CYT1   | 1.00 | 1.01  | 1.36  | -1.71 |
| YJL173C | RFA3   | 1.00 | -1.19 | -1.25 | -1.71 |
| YHR147C | MRPL6  | 1.00 | -1.22 | -1.55 | -1.71 |
| YIR024C | GIF1   | 1.00 | -1.53 | -1.64 | -1.71 |
| YKR100C |        | 1.00 | -1.57 | -1.49 | -1.71 |
| YLR247C |        | 1.00 | -1.59 | -1.71 | -1.71 |
| YCL005W |        | 1.00 | -1.67 | -1.74 | -1.71 |
| YLR437C |        | 1.00 | -1.73 | -1.76 | -1.71 |
| YLR365W |        | 1.00 | -1.82 | -1.95 | -1.71 |
| YKL094W | YJU3   | 1.00 | -2.79 | -1.96 | -1.71 |
| YNL115C |        | 1.00 | -1.06 | -1.39 | -1.72 |
| YDR530C | APA2   | 1.00 | -1.21 | -1.20 | -1.72 |
| YNL306W | MRPS18 | 1.00 | -1.26 | -1.52 | -1.72 |
| YDR376W | ARH1   | 1.00 | -1.29 | -1.48 | -1.72 |
| YPL186C |        | 1.00 | -1.29 | 1.03  | -1.72 |
| YLR292C | SEC72  | 1.00 | -1.53 | -1.84 | -1.72 |
| YKR069W | MET1   | 1.00 | -1.60 | -1.76 | -1.72 |
| YDL042C | SIR2   | 1.00 | -1.71 | -1.70 | -1.72 |
| YMR007W |        | 1.00 | -1.78 | -1.74 | -1.72 |
| YJR015W |        | 1.00 | -2.08 | -1.72 | -1.72 |
| YDR401W |        | 1.00 | -2.53 | -1.86 | -1.72 |
| YBR116C |        | 1.00 | 1.96  | -1.29 | -1.73 |
| YIR016W |        | 1.00 | -1.04 | -1.14 | -1.73 |
| YER114C | BOI2   | 1.00 | -1.21 | -1.53 | -1.73 |
| YMR072W | ABF2   | 1.00 | -1.34 | -1.44 | -1.73 |
| YGR075C | PRP38  | 1.00 | -1.46 | -1.54 | -1.73 |
| YJL119C |        | 1.00 | -1.78 | -1.85 | -1.73 |
| YJL019W |        | 1.00 | -1.91 | -1.54 | -1.73 |
| YKL154W | SRP102 | 1.00 | -2.80 | -2.00 | -1.73 |
| YGR243W |        | 1.00 | 1.66  | 1.52  | -1.74 |
| YMR188C |        | 1.00 | -1.15 | -1.38 | -1.74 |
| YER146W | LSM5   | 1.00 | -1.17 | -1.04 | -1.74 |
| YKR016W |        | 1.00 | -1.21 | -1.07 | -1.74 |
| YPR014C |        | 1.00 | -1.37 | -1.67 | -1.74 |
| YOR228C |        | 1.00 | -1.43 | -1.67 | -1.74 |
| YKL208W | CBT1   | 1.00 | -1.53 | -1.62 | -1.74 |
| YJL020C | BBC1   | 1.00 | -1.54 | -1.61 | -1.74 |
| YDR375C | BCS1   | 1.00 | -1.59 | -1.82 | -1.74 |
| YMR069W |        | 1.00 | -1.59 | -1.48 | -1.74 |
| YCL068C |        | 1.00 | -1.63 | -1.88 | -1.74 |
| YLR059C | REX2   | 1.00 | -1.64 | -1.86 | -1.74 |
| YJR152W | DAL5   | 1.00 | -1.68 | -1.54 | -1.74 |
| YNL039W | TFC5   | 1.00 | -1.71 | -1.98 | -1.74 |
| YBR279W | PAF1   | 1.00 | -2.90 | -2.67 | -1.74 |
| YGR086C |        | 1.00 | 1.21  | 1.29  | -1.75 |
| YDR298C | ATP5   | 1.00 | -1.03 | 1.04  | -1.75 |
| YGR008C | STF2   | 1.00 | -1.30 | -1.21 | -1.75 |
| YJL115W | ASF1   | 1.00 | -1.37 | -1.38 | -1.75 |
| YNL138W | SRV2   | 1.00 | -1.37 | -1.44 | -1.75 |
| YJL118W |        | 1.00 | -1.39 | -1.65 | -1.75 |
| YMR059W | SEN15  | 1.00 | -1.44 | -2.00 | -1.75 |
| YDL162C |        | 1.00 | -1.49 | -1.61 | -1.75 |
| YFL025C | BST1   | 1.00 | -1.49 | -1.81 | -1.75 |

|         |            |      |       |       |       |
|---------|------------|------|-------|-------|-------|
| YLR418C | CDC73      | 1.00 | -1.59 | -1.70 | -1.75 |
| YOR030W | DFG16      | 1.00 | -1.78 | -1.71 | -1.75 |
| YKR004C | ECM9       | 1.00 | -1.92 | -1.65 | -1.75 |
| YOL122C | SMF1       | 1.00 | -2.06 | -1.88 | -1.75 |
| YDR032C | PST2       | 1.00 | 1.11  | -1.17 | -1.76 |
| YPR030W | CSR2       | 1.00 | -1.08 | -1.03 | -1.76 |
| YDR218C | SPR28      | 1.00 | -1.34 | -1.23 | -1.76 |
| YLR419W |            | 1.00 | -1.45 | -1.37 | -1.76 |
| YGR104C | SRB5       | 1.00 | -1.50 | -2.04 | -1.76 |
| YJL093C | TOK1       | 1.00 | -1.50 | -1.68 | -1.76 |
| YPL171C | OYE3       | 1.00 | -1.70 | -1.88 | -1.76 |
| YML104C | MDM1       | 1.00 | -1.73 | -1.35 | -1.76 |
| YOR350C | MNE1       | 1.00 | -2.01 | -1.34 | -1.76 |
| YOL098C |            | 1.00 | -2.02 | -2.13 | -1.76 |
| YBL018C | POP8       | 1.00 | -2.19 | -1.85 | -1.76 |
| YGL170C | SPO74      | 1.00 | -2.41 | -1.98 | -1.76 |
| YGL081W |            | 1.00 | -1.31 | -1.42 | -1.77 |
| YHR125W |            | 1.00 | -1.49 | -1.88 | -1.77 |
| YMR164C | MSS11      | 1.00 | -1.52 | -1.45 | -1.77 |
| YLR404W |            | 1.00 | -1.59 | -1.55 | -1.77 |
| YMR082C |            | 1.00 | -1.65 | -1.95 | -1.77 |
| YLR058C | SHM2       | 1.00 | -2.22 | -2.56 | -1.77 |
| YDR520C |            | 1.00 | -2.29 | -1.89 | -1.77 |
| YDL067C | COX9       | 1.00 | -1.14 | -1.39 | -1.78 |
| YKL162C |            | 1.00 | -1.20 | -1.54 | -1.78 |
| YPL016W | SW11       | 1.00 | -1.26 | -1.74 | -1.78 |
| YOR230W | WTM1       | 1.00 | -1.44 | -1.20 | -1.78 |
| YLR408C |            | 1.00 | -1.57 | -1.92 | -1.78 |
| YNR059W | MNT4       | 1.00 | -1.77 | -2.26 | -1.78 |
| YNL051W | COD4       | 1.00 | -2.09 | -1.65 | -1.78 |
| YKL070W |            | 1.00 | -2.76 | -2.19 | -1.78 |
| YJL210W | PEX2       | 1.00 | 1.13  | 1.02  | -1.79 |
| YJL131C |            | 1.00 | -1.23 | -1.46 | -1.79 |
| YER080W |            | 1.00 | -1.27 | -1.11 | -1.79 |
| YGL156W | AMS1       | 1.00 | -1.28 | -1.69 | -1.79 |
| YLR438W | CAR2       | 1.00 | -1.33 | -1.44 | -1.79 |
| YMR294W | JNM1       | 1.00 | -1.33 | -1.61 | -1.79 |
| YPL054W | LEE1       | 1.00 | 1.03  | -1.21 | -1.80 |
| YLL028W | TPO1       | 1.00 | -1.30 | -1.67 | -1.80 |
| YKR006C | MRPL13     | 1.00 | -1.48 | -1.84 | -1.80 |
| YGL089C | MF(ALPHA)2 | 1.00 | -1.54 | -1.50 | -1.80 |
| YLR375W | STP3       | 1.00 | -1.55 | -1.86 | -1.80 |
| YML013W |            | 1.00 | -1.58 | -2.03 | -1.80 |
| YOL102C | TPT1       | 1.00 | -1.62 | -1.70 | -1.80 |
| YLR443W | ECM7       | 1.00 | -1.88 | -1.52 | -1.80 |
| YJR135C | MCM22      | 1.00 | -2.17 | -2.02 | -1.80 |
| YPR069C | SPE3       | 1.00 | -2.43 | -2.21 | -1.80 |
| YGR061C | ADE6       | 1.00 | -2.66 | -3.54 | -1.80 |
| YCL040W | GLK1       | 1.00 | 1.63  | 1.04  | -1.81 |
| YKL103C | LAP4       | 1.00 | 1.05  | -1.09 | -1.81 |
| YGL080W |            | 1.00 | -1.09 | 1.00  | -1.81 |
| YGL068W |            | 1.00 | -1.10 | -1.51 | -1.81 |
| YJR085C |            | 1.00 | -1.31 | -1.32 | -1.81 |
| YBR021W | FUR4       | 1.00 | -1.39 | -1.93 | -1.81 |
| YKL086W |            | 1.00 | -1.43 | -1.68 | -1.81 |
| YMR280C | CAT8       | 1.00 | -1.45 | -1.14 | -1.81 |
| YOR215C |            | 1.00 | -1.50 | -1.48 | -1.81 |
| YLR386W |            | 1.00 | -1.66 | -1.57 | -1.81 |
| YLR186W | EMG1       | 1.00 | -1.72 | -2.04 | -1.81 |
| YMR002W |            | 1.00 | -1.78 | -1.72 | -1.81 |
| YFR003C |            | 1.00 | -1.11 | -1.07 | -1.82 |



|         |        |      |       |       |       |
|---------|--------|------|-------|-------|-------|
| YML091C | RPM2   | 1.00 | -1.24 | -1.22 | -1.82 |
| YDL056W | MBP1   | 1.00 | -1.30 | -1.64 | -1.82 |
| YER129W | PAK1   | 1.00 | -1.38 | -1.90 | -1.82 |
| YLR436C | ECM30  | 1.00 | -1.57 | -1.30 | -1.82 |
| YML120C | NDI1   | 1.00 | -1.66 | -1.02 | -1.82 |
| YJL092W | HPR5   | 1.00 | -1.69 | -1.73 | -1.82 |
| YER084W |        | 1.00 | -2.10 | -2.16 | -1.82 |
| YGL181W | GTS1   | 1.00 | -3.37 | -2.11 | -1.82 |
| YOR045W | TOM6   | 1.00 | 1.05  | -1.15 | -1.83 |
| YMR053C | STB2   | 1.00 | -1.54 | -1.60 | -1.83 |
| YKL090W |        | 1.00 | -1.72 | -1.82 | -1.83 |
| YGL175C | SAE2   | 1.00 | -2.06 | -2.00 | -1.83 |
| YDR271C |        | 1.00 | -2.16 | -2.14 | -1.83 |
| YKL045W | PRI2   | 1.00 | -2.18 | -1.81 | -1.83 |
| YNL134C |        | 1.00 | 1.00  | -1.07 | -1.84 |
| YER093C |        | 1.00 | -1.42 | -1.81 | -1.84 |
| YOR139C |        | 1.00 | -1.52 | -1.82 | -1.84 |
| YCR082W |        | 1.00 | -1.72 | -1.74 | -1.84 |
| YGL162W | SUT1   | 1.00 | -1.79 | -1.83 | -1.84 |
| YJL129C | TRK1   | 1.00 | -2.13 | -2.08 | -1.84 |
| YJR112W | NNF1   | 1.00 | -2.44 | -1.86 | -1.84 |
| YGL069C |        | 1.00 | -1.18 | -1.57 | -1.85 |
| YGL090W | LIF1   | 1.00 | -1.43 | -1.58 | -1.85 |
| YDR115W |        | 1.00 | -1.56 | -1.70 | -1.85 |
| YOL112W | MSB4   | 1.00 | -1.67 | -1.60 | -1.85 |
| YMR207C | HFA1   | 1.00 | -2.25 | -2.27 | -1.85 |
| YMR271C | URA10  | 1.00 | -2.81 | -2.06 | -1.85 |
| YDR197W | CBS2   | 1.00 | -1.31 | -1.55 | -1.86 |
| YKL013C | ARC19  | 1.00 | -1.42 | -1.45 | -1.86 |
| YJR162C |        | 1.00 | -2.04 | -1.79 | -1.86 |
| YMR198W | CIK1   | 1.00 | -2.51 | -1.91 | -1.86 |
| YPL078C | ATP4   | 1.00 | -1.01 | -1.07 | -1.87 |
| YGR110W |        | 1.00 | -1.08 | -1.38 | -1.87 |
| YOR349W | CIN1   | 1.00 | -1.34 | -1.25 | -1.87 |
| YBR230C |        | 1.00 | -1.39 | -1.60 | -1.87 |
| YJL091C |        | 1.00 | -1.63 | -1.98 | -1.87 |
| YPR128C | ANT1   | 1.00 | -1.73 | -1.99 | -1.87 |
| YGL188C |        | 1.00 | -1.76 | -1.75 | -1.87 |
| YIL039W |        | 1.00 | -1.88 | -2.00 | -1.87 |
| YPL058C | PDR12  | 1.00 | -1.91 | -2.00 | -1.87 |
| YOR391C |        | 1.00 | -1.40 | -1.51 | -1.88 |
| YGL092W | NUP145 | 1.00 | -1.43 | -1.32 | -1.88 |
| YKR001C | VPS1   | 1.00 | -2.03 | -1.68 | -1.88 |
| YEL068C |        | 1.00 | -2.37 | -2.63 | -1.88 |
| YGL187C | COX4   | 1.00 | 1.06  | -1.02 | -1.89 |
| YML050W |        | 1.00 | -1.45 | -1.84 | -1.89 |
| YML029W |        | 1.00 | -1.52 | -1.76 | -1.89 |
| YBL043W | ECM13  | 1.00 | -1.67 | -2.06 | -1.89 |
| YJL160C |        | 1.00 | -1.81 | -1.93 | -1.89 |
| YJR056C |        | 1.00 | -2.10 | -1.87 | -1.89 |
| YFR011C |        | 1.00 | -1.20 | -1.29 | -1.90 |
| YLR038C | COX12  | 1.00 | -1.38 | -1.30 | -1.90 |
| YJR098C |        | 1.00 | -1.73 | -1.97 | -1.90 |
| YAL067C | SEO1   | 1.00 | -1.76 | -1.88 | -1.90 |
| YIL124W | AYR1   | 1.00 | -1.14 | -1.22 | -1.91 |
| YLR269C |        | 1.00 | -1.51 | -1.73 | -1.91 |
| YML096W |        | 1.00 | -1.91 | -1.62 | -1.91 |
| YLR429W | CRN1   | 1.00 | -1.47 | -1.41 | -1.92 |
| YML095C | RAD10  | 1.00 | -1.53 | -1.72 | -1.92 |
| YLR425W | TUS1   | 1.00 | -1.89 | -1.81 | -1.92 |
| YLR045C | STU2   | 1.00 | -2.31 | -2.19 | -1.92 |

|         |        |      |       |       |       |
|---------|--------|------|-------|-------|-------|
| YJL169W |        | 1.00 | -2.63 | -2.58 | -1.92 |
| YOR042W |        | 1.00 | -1.36 | -1.26 | -1.93 |
| YIL077C |        | 1.00 | -1.45 | -1.46 | -1.93 |
| YML015C | TAF40  | 1.00 | -1.53 | -1.95 | -1.93 |
| YLR281C |        | 1.00 | -1.72 | -2.03 | -1.93 |
| YML111W | BUL2   | 1.00 | -1.98 | -1.93 | -1.93 |
| YLL023C |        | 1.00 | -2.40 | -2.24 | -1.93 |
| YDR114C |        | 1.00 | -2.84 | -2.37 | -1.93 |
| YER181C |        | 1.00 | -1.30 | -1.43 | -1.94 |
| YDL220C | CDC13  | 1.00 | -1.40 | -2.10 | -1.94 |
| YLR259C | HSP60  | 1.00 | -1.44 | -1.41 | -1.94 |
| YMR087W |        | 1.00 | -1.53 | -1.76 | -1.94 |
| YPL047W |        | 1.00 | -1.56 | -1.32 | -1.94 |
| YAR061W |        | 1.00 | -1.61 | -2.04 | -1.94 |
| YBL064C |        | 1.00 | -1.66 | -1.96 | -1.94 |
| YLL035W | GRC3   | 1.00 | -1.78 | -1.85 | -1.94 |
| YJL175W |        | 1.00 | -1.80 | -1.83 | -1.94 |
| YNL100W |        | 1.00 | -1.85 | -1.61 | -1.94 |
| YPL035C |        | 1.00 | -2.66 | -2.37 | -1.94 |
| YML131W |        | 1.00 | -1.28 | -1.37 | -1.95 |
| YMR107W |        | 1.00 | 1.59  | 1.70  | -1.96 |
| YKR005C |        | 1.00 | -1.33 | -1.62 | -1.96 |
| YLR163C | MAS1   | 1.00 | -1.65 | -2.36 | -1.96 |
| YGR002C |        | 1.00 | -1.92 | -2.04 | -1.96 |
| YML016C | PPZ1   | 1.00 | -2.00 | -1.86 | -1.96 |
| YJR038C |        | 1.00 | -2.05 | -2.36 | -1.96 |
| YJL192C |        | 1.00 | -2.07 | -2.03 | -1.96 |
| YGR095C | RRP46  | 1.00 | -3.43 | -2.24 | -1.96 |
| YPR191W | QCR2   | 1.00 | -1.24 | -1.30 | -1.97 |
| YOR187W | TUF1   | 1.00 | -1.33 | -1.32 | -1.97 |
| YMR184W |        | 1.00 | -1.38 | -1.41 | -1.97 |
| YPR098C |        | 1.00 | -1.47 | -1.67 | -1.97 |
| YDR310C | SUM1   | 1.00 | -1.70 | -1.82 | -1.97 |
| YLL052C | AQY2   | 1.00 | -1.72 | -1.81 | -1.97 |
| YIL086C |        | 1.00 | -1.89 | -1.78 | -1.97 |
| YKR083C | DAD2   | 1.00 | -2.06 | -2.21 | -1.97 |
| YML028W | TSA1   | 1.00 | -1.26 | -1.21 | -1.98 |
| YBL100C |        | 1.00 | -1.47 | -1.29 | -1.98 |
| YCR088W | ABP1   | 1.00 | -1.51 | -1.57 | -1.98 |
| YOR079C | ATX2   | 1.00 | -2.12 | -2.04 | -1.98 |
| YFR049W | YMR31  | 1.00 | -1.06 | -1.17 | -1.99 |
| YFR012W |        | 1.00 | -1.62 | -1.98 | -1.99 |
| YLR444C |        | 1.00 | -1.68 | -1.71 | -1.99 |
| YPL185W |        | 1.00 | -1.89 | -1.78 | -1.99 |
| YNL054W | VAC7   | 1.00 | -2.54 | -2.45 | -1.99 |
| YKR009C | FOX2   | 1.00 | 1.25  | -1.67 | -2.00 |
| YER166W |        | 1.00 | 1.01  | -1.05 | -2.00 |
| YGR201C |        | 1.00 | -1.46 | -1.69 | -2.00 |
| YJL207C |        | 1.00 | -1.84 | -1.90 | -2.00 |
| YDL174C | DLD1   | 1.00 | -1.98 | -2.56 | -2.00 |
| YHR059W | FYV4   | 1.00 | -2.23 | -1.97 | -2.00 |
| YOL083W |        | 1.00 | -3.41 | -2.00 | -2.00 |
| YJL193W |        | 1.00 | -2.30 | -2.08 | -2.01 |
| YJR144W | MGM101 | 1.00 | -2.36 | -2.30 | -2.01 |
| YLR352W |        | 1.00 | -1.52 | -1.70 | -2.02 |
| YML018C |        | 1.00 | -1.90 | -2.43 | -2.02 |
| YJR110W |        | 1.00 | -2.05 | -2.01 | -2.02 |
| YAL044C | GCV3   | 1.00 | -1.48 | -2.04 | -2.03 |
| YDR389W | SAC7   | 1.00 | -1.62 | -1.74 | -2.03 |
| YBR221C | PDB1   | 1.00 | -1.96 | -2.63 | -2.03 |
| YKR085C | MRPL20 | 1.00 | -2.00 | -2.04 | -2.03 |

|         |        |      |       |       |       |
|---------|--------|------|-------|-------|-------|
| YMR061W | RNA14  | 1.00 | -2.02 | -1.89 | -2.03 |
| YLR154C |        | 1.00 | -2.03 | -2.20 | -2.03 |
| YBL099W | ATP1   | 1.00 | -3.33 | -4.00 | -2.03 |
| YPR151C |        | 1.00 | -1.11 | 1.00  | -2.04 |
| YIR006C | PAN1   | 1.00 | -1.80 | -1.96 | -2.04 |
| YBR262C |        | 1.00 | -2.61 | -2.26 | -2.04 |
| YLR010C | TEN1   | 1.00 | -2.01 | -1.90 | -2.05 |
| YKR035C |        | 1.00 | -1.27 | -1.33 | -2.06 |
| YPL154C | PEP4   | 1.00 | -1.30 | -1.46 | -2.06 |
| YMR090W |        | 1.00 | -1.63 | -1.25 | -2.06 |
| YDR216W | ADR1   | 1.00 | -1.72 | -1.68 | -2.06 |
| YPR150W |        | 1.00 | -1.96 | -1.49 | -2.06 |
| YLR335W | NUP2   | 1.00 | -2.26 | -2.72 | -2.06 |
| YNL149C |        | 1.00 | -4.44 | -2.09 | -2.06 |
| YNL150W |        | 1.00 | -1.42 | -1.52 | -2.07 |
| YLR407W |        | 1.00 | -1.94 | -2.12 | -2.07 |
| YLR302C |        | 1.00 | -1.96 | -1.96 | -2.07 |
| YKL018W | SWD2   | 1.00 | -2.22 | -1.86 | -2.07 |
| YGR003W |        | 1.00 | -1.28 | -1.33 | -2.08 |
| YDR286C |        | 1.00 | -1.79 | -1.73 | -2.08 |
| YJR134C | SGM1   | 1.00 | -1.98 | -2.51 | -2.08 |
| YKL079W | SMY1   | 1.00 | -2.43 | -2.25 | -2.08 |
| YDR377W | ATP17  | 1.00 | -1.15 | -1.09 | -2.09 |
| YPL059W | GRX5   | 1.00 | -1.42 | -1.68 | -2.09 |
| YGL183C | MND1   | 1.00 | -1.97 | -2.45 | -2.09 |
| YPL094C | SEC62  | 1.00 | -2.08 | -1.79 | -2.09 |
| YDL223C |        | 1.00 | 1.62  | -1.44 | -2.10 |
| YGR202C | PCT1   | 1.00 | -1.47 | -1.52 | -2.10 |
| YKL122C | SRP21  | 1.00 | -1.58 | -1.71 | -2.10 |
| YML129C | COX14  | 1.00 | -1.60 | -1.61 | -2.10 |
| YLR439W | MRPL4  | 1.00 | -1.74 | -2.07 | -2.10 |
| YLR409C |        | 1.00 | -2.18 | -2.10 | -2.10 |
| YLR459W | CDC91  | 1.00 | -1.26 | -1.23 | -2.11 |
| YML042W | CAT2   | 1.00 | -1.28 | -1.77 | -2.11 |
| YPR099C |        | 1.00 | -1.53 | -1.80 | -2.11 |
| YBR218C | PYC2   | 1.00 | -2.35 | -2.39 | -2.11 |
| YLR153C | ACS2   | 1.00 | -2.85 | -2.56 | -2.11 |
| YOR268C |        | 1.00 | -1.71 | -2.09 | -2.12 |
| YJR158W | HXT16  | 1.00 | -1.87 | -2.08 | -2.12 |
| YOR031W | CRS5   | 1.00 | -2.01 | -1.96 | -2.12 |
| YDL228C |        | 1.00 | -2.04 | -6.79 | -2.12 |
| YML060W | OGG1   | 1.00 | -2.06 | -2.00 | -2.12 |
| YML103C | NUP188 | 1.00 | -2.15 | -2.08 | -2.12 |
| YDL222C |        | 1.00 | 2.20  | 1.50  | -2.13 |
| YFL018C | LPD1   | 1.00 | -1.85 | -2.10 | -2.13 |
| YMR252C |        | 1.00 | -2.06 | -1.88 | -2.13 |
| YAL032C | PRP45  | 1.00 | -1.76 | -2.22 | -2.14 |
| YMR086W |        | 1.00 | -1.02 | -1.49 | -2.15 |
| YGL166W | CUP2   | 1.00 | -1.22 | -1.47 | -2.15 |
| YKL148C | SDH1   | 1.00 | -1.32 | -1.52 | -2.15 |
| YGR074W | SMD1   | 1.00 | -1.49 | -1.72 | -2.15 |
| YKR011C | TOS5   | 1.00 | -1.57 | -1.90 | -2.15 |
| YLR428C |        | 1.00 | -1.93 | -2.04 | -2.15 |
| YML035C | AMD1   | 1.00 | -2.04 | -2.12 | -2.15 |
| YDR260C | SWM1   | 1.00 | -2.42 | -2.11 | -2.15 |
| YGL174W | BUD13  | 1.00 | -2.73 | -2.47 | -2.15 |
| YJR042W | NUP85  | 1.00 | -1.86 | -2.21 | -2.16 |
| YLR162W |        | 1.00 | -1.48 | -4.26 | -2.17 |
| YKR033C |        | 1.00 | -1.66 | -1.62 | -2.17 |
| YGR182C |        | 1.00 | -1.30 | -1.52 | -2.18 |
| YKL067W | YNK1   | 1.00 | -1.42 | -1.53 | -2.18 |

|         |        |      |       |       |       |
|---------|--------|------|-------|-------|-------|
| YDL158C |        | 1.00 | -1.32 | -1.54 | -2.19 |
| YKL160W |        | 1.00 | -1.51 | -1.71 | -2.19 |
| YPR100W |        | 1.00 | -2.33 | -1.75 | -2.19 |
| YGL057C |        | 1.00 | -1.85 | -2.08 | -2.20 |
| YDR178W | SDH4   | 1.00 | -1.54 | -1.24 | -2.21 |
| YLL009C | COX17  | 1.00 | -1.93 | -2.19 | -2.21 |
| YLL057C |        | 1.00 | -1.49 | -1.78 | -2.22 |
| YKL135C | APL2   | 1.00 | -1.70 | -1.56 | -2.22 |
| YLR178C | TFS1   | 1.00 | 1.10  | -1.24 | -2.23 |
| YNL131W | TOM22  | 1.00 | -1.32 | -1.72 | -2.23 |
| YKL134C | 01-Oct | 1.00 | -1.65 | -1.76 | -2.23 |
| YJR050W | ISY1   | 1.00 | -1.89 | -2.33 | -2.23 |
| YMR199W | CLN1   | 1.00 | -2.36 | -2.78 | -2.23 |
| YFR014C | CMK1   | 1.00 | -1.29 | -1.14 | -2.24 |
| YKR095W | MLP1   | 1.00 | -1.66 | -2.07 | -2.24 |
| YJR054W |        | 1.00 | -1.68 | -1.86 | -2.24 |
| YOR162C | YRR1   | 1.00 | -2.09 | -2.30 | -2.24 |
| YNL271C | BNI1   | 1.00 | -2.74 | -2.51 | -2.24 |
| YER041W | YEN1   | 1.00 | -1.33 | -1.04 | -2.25 |
| YPL262W | FUM1   | 1.00 | -1.54 | -1.64 | -2.25 |
| YLR213C | CRR1   | 1.00 | -2.26 | -2.25 | -2.26 |
| YLR385C |        | 1.00 | -2.17 | -2.24 | -2.27 |
| YLR427W |        | 1.00 | -2.29 | -2.64 | -2.27 |
| YJR048W | CYC1   | 1.00 | -1.51 | -1.52 | -2.28 |
| YLR233C | EST1   | 1.00 | -2.52 | -2.89 | -2.28 |
| YJL155C | FBP26  | 1.00 | -1.85 | -2.09 | -2.29 |
| YJR004C | SAG1   | 1.00 | -2.61 | -2.29 | -2.30 |
| YOR136W | IDH2   | 1.00 | -1.63 | -1.58 | -2.31 |
| YJR141W |        | 1.00 | -1.80 | -1.90 | -2.31 |
| YJL180C | ATP12  | 1.00 | -1.96 | -2.51 | -2.31 |
| YJR127C | ZMS1   | 1.00 | -1.96 | -2.21 | -2.31 |
| YNL015W | PBI2   | 1.00 | -1.20 | -1.72 | -2.33 |
| YFL033C | RIM15  | 1.00 | -2.25 | -2.52 | -2.33 |
| YOR207C | RET1   | 1.00 | -2.73 | -2.57 | -2.34 |
| YGL191W | COX13  | 1.00 | -1.18 | -1.50 | -2.35 |
| YLL042C | APG10  | 1.00 | -1.71 | -2.05 | -2.35 |
| YJR138W | IML1   | 1.00 | -2.05 | -2.11 | -2.35 |
| YLR398C | SKI2   | 1.00 | -1.97 | -1.90 | -2.36 |
| YJL078C | PRY3   | 1.00 | -2.79 | -2.85 | -2.37 |
| YLR460C |        | 1.00 | -1.35 | -1.43 | -2.38 |
| YFL059W | SNZ3   | 1.00 | -1.69 | -2.19 | -2.39 |
| YBL045C | COR1   | 1.00 | -1.82 | -1.94 | -2.39 |
| YLR455W |        | 1.00 | -1.47 | -2.26 | -2.40 |
| YHL032C | GUT1   | 1.00 | -1.88 | -2.34 | -2.40 |
| YKL140W | TGL1   | 1.00 | -1.48 | -1.88 | -2.41 |
| YKL076C |        | 1.00 | -2.04 | -2.20 | -2.41 |
| YNL208W |        | 1.00 | -1.17 | -1.51 | -2.42 |
| YNL151C | RPC31  | 1.00 | -1.56 | -1.83 | -2.42 |
| YGL062W | PYC1   | 1.00 | -1.67 | -1.73 | -2.42 |
| YNL034W |        | 1.00 | -1.88 | -1.97 | -2.42 |
| YJR073C | OPI3   | 1.00 | -1.89 | -1.78 | -2.44 |
| YFL055W | AGP3   | 1.00 | -1.48 | -1.76 | -2.46 |
| YER106W | MAM1   | 1.00 | -1.52 | -1.99 | -2.46 |
| YKL141W | SDH3   | 1.00 | -1.51 | -1.59 | -2.47 |
| YML128C | MSC1   | 1.00 | 1.73  | 1.01  | -2.48 |
| YJL166W | QCR8   | 1.00 | -1.50 | -1.35 | -2.48 |
| YCR093W | CDC39  | 1.00 | -2.04 | -3.16 | -2.48 |
| YBR032W |        | 1.00 | -2.11 | -2.33 | -2.48 |
| YEL057C |        | 1.00 | -2.29 | -2.54 | -2.48 |
| YKL044W |        | 1.00 | -2.29 | -2.61 | -2.48 |
| YLR152C |        | 1.00 | -2.50 | -3.03 | -2.48 |

|         |        |      |       |       |       |
|---------|--------|------|-------|-------|-------|
| YBR301W | DAN3   | 1.00 | -1.29 | -2.27 | -2.50 |
| YKL066W |        | 1.00 | -1.93 | -2.40 | -2.50 |
| YKL069W |        | 1.00 | -2.32 | -2.41 | -2.51 |
| YOL055C | THI20  | 1.00 | -3.05 | -2.01 | -2.53 |
| YPL223C | GRE1   | 1.00 | -1.14 | -2.03 | -2.54 |
| YLR215C | CDC123 | 1.00 | -2.14 | -2.43 | -2.54 |
| YMR097C |        | 1.00 | -2.85 | -2.22 | -2.54 |
| YLR069C | MEF1   | 1.00 | -2.26 | -5.68 | -2.56 |
| YHR180W |        | 1.00 | -2.33 | -2.24 | -2.56 |
| YER160C |        | 1.00 | -2.86 | -3.66 | -2.56 |
| YDR529C | QCR7   | 1.00 | -1.02 | 1.10  | -2.57 |
| YKL133C |        | 1.00 | -1.66 | -1.70 | -2.57 |
| YPR004C |        | 1.00 | -2.20 | -2.71 | -2.57 |
| YGL177W |        | 1.00 | -1.50 | -1.62 | -2.58 |
| YJL035C | TAD2   | 1.00 | -2.21 | -2.17 | -2.58 |
| YKL093W | MBR1   | 1.00 | -2.31 | -2.23 | -2.58 |
| YKR102W | FLO10  | 1.00 | -1.62 | -2.10 | -2.61 |
| YML007W | YAP1   | 1.00 | -2.05 | -2.14 | -2.61 |
| YNL025C | SSN8   | 1.00 | -3.73 | -2.66 | -2.62 |
| YJR035W | RAD26  | 1.00 | -1.82 | -1.95 | -2.64 |
| YGR098C | ESP1   | 1.00 | -2.03 | -2.72 | -2.64 |
| YLR454W |        | 1.00 | 1.11  | -1.83 | -2.66 |
| YGR244C | LSC2   | 1.00 | 1.06  | -1.28 | -2.66 |
| YJL172W | CPS1   | 1.00 | -1.82 | -1.86 | -2.66 |
| YPR002W | PDH1   | 1.00 | -1.84 | -2.38 | -2.66 |
| YML049C | RSE1   | 1.00 | -2.43 | -3.13 | -2.66 |
| YLR334C |        | 1.00 | -2.57 | -4.48 | -2.67 |
| YLR121C | YPS3   | 1.00 | -2.59 | -2.27 | -2.67 |
| YPL040C | ISM1   | 1.00 | -2.60 | -2.78 | -2.68 |
| YDR148C | KGD2   | 1.00 | -1.89 | -1.63 | -2.69 |
| YLL055W |        | 1.00 | -2.00 | -2.12 | -2.70 |
| YIL034C | CAP2   | 1.00 | -2.21 | -2.24 | -2.70 |
| YLL041C | SDH2   | 1.00 | -1.10 | -1.31 | -2.71 |
| YPL134C | ODC1   | 1.00 | -1.55 | -1.60 | -2.71 |
| YER161C | SPT2   | 1.00 | -2.60 | -2.42 | -2.71 |
| YJR121W | ATP2   | 1.00 | -1.44 | -1.41 | -2.73 |
| YLL040C | VPS13  | 1.00 | -2.20 | -2.49 | -2.75 |
| YOR348C | PUT4   | 1.00 | -1.39 | -1.57 | -2.76 |
| YKL130C | SHE2   | 1.00 | -2.95 | -2.38 | -2.76 |
| YPL074W | YTA6   | 1.00 | -2.31 | -2.62 | -2.83 |
| YLL050C | COF1   | 1.00 | -2.33 | -2.52 | -2.87 |
| YLR057W |        | 1.00 | -2.44 | -5.86 | -2.87 |
| YKL142W | MRP8   | 1.00 | -2.38 | -1.82 | -2.89 |
| YLR201C |        | 1.00 | -2.76 | -2.60 | -2.89 |
| YNL037C | IDH1   | 1.00 | -1.27 | -1.73 | -2.90 |
| YOR362C | PRE10  | 1.00 | -1.84 | -1.99 | -2.90 |
| YML107C |        | 1.00 | -2.63 | -4.07 | -2.90 |
| YCR050C |        | 1.00 | -3.65 | -3.23 | -2.91 |
| YJR036C | HUL4   | 1.00 | -1.76 | -1.93 | -2.92 |
| YBR115C | LYS2   | 1.00 | -3.11 | -5.29 | -2.92 |
| YIR039C | YPS6   | 1.00 | -1.81 | -2.07 | -2.93 |
| YDR536W | STL1   | 1.00 | -1.44 | -2.33 | -2.95 |
| YGR176W |        | 1.00 | -1.28 | -1.54 | -2.97 |
| YKL085W | MDH1   | 1.00 | -1.34 | -1.49 | -3.05 |
| YLR346C |        | 1.00 | -2.74 | -7.08 | -3.06 |
| YFL060C | SNO3   | 1.00 | -2.75 | -2.53 | -3.06 |
| YDL229W | SSB1   | 1.00 | -3.37 | -6.47 | -3.06 |
| YJR066W | TOR1   | 1.00 | -1.74 | -2.88 | -3.10 |
| YLR214W | FRE1   | 1.00 | -2.21 | -2.93 | -3.11 |
| YPL248C | GAL4   | 1.00 | -2.22 | -2.62 | -3.15 |
| YIL166C |        | 1.00 | -2.85 | -2.79 | -3.15 |

|           |        |      |       |       |       |
|-----------|--------|------|-------|-------|-------|
| YKR103W   |        | 1.00 | -1.42 | -1.80 | -3.16 |
| YLR358C   |        | 1.00 | -3.10 | -3.23 | -3.16 |
| YFL030W   |        | 1.00 | -1.52 | -1.41 | -3.17 |
| YPL070W   |        | 1.00 | -1.44 | -2.42 | -3.18 |
| YLR245C   | CDD1   | 1.00 | -2.68 | -7.36 | -3.20 |
| YLR377C   | FBP1   | 1.00 | -3.19 | -3.81 | -3.28 |
| YNL117W   | MLS1   | 1.00 | -3.68 | -3.79 | -3.29 |
| YML003W   |        | 1.00 | -3.40 | -3.09 | -3.30 |
| YGL019W   | CKB1   | 1.00 | -1.26 | -1.95 | -3.31 |
| YKR086W   | PRP16  | 1.00 | -3.05 | -2.83 | -3.38 |
| YDR356W   | NUF1   | 1.00 | -3.61 | -4.20 | -3.38 |
| YOR019W   |        | 1.00 | -2.90 | -2.75 | -3.42 |
| YFL005W   | SEC4   | 1.00 | -1.71 | -2.15 | -3.50 |
| YPR071W   |        | 1.00 | -1.82 | -2.81 | -3.53 |
| YIL125W   | KGD1   | 1.00 | -2.46 | -2.06 | -3.55 |
| YOL046C   |        | 1.00 | -2.52 | -2.94 | -3.56 |
| YLR327C   |        | 1.00 | 2.03  | 2.26  | -3.59 |
| YJL144W   |        | 1.00 | -2.86 | -3.39 | -3.63 |
| YAL054C   | ACS1   | 1.00 | -3.36 | -3.54 | -3.69 |
| YBR103W   | SIF2   | 1.00 | -1.95 | -2.99 | -3.70 |
| YHR033W   |        | 1.00 | -2.92 | -3.93 | -3.75 |
| YKL055C   | OAR1   | 1.00 | -2.56 | -2.80 | -3.78 |
| YGL007W   |        | 1.00 | -1.68 | -2.28 | -3.89 |
| YLL049W   |        | 1.00 | -3.21 | -2.69 | -3.99 |
| YGR076C   | MRPL25 | 1.00 | -2.97 | -5.75 | -4.03 |
| YJR120W   |        | 1.00 | -2.06 | -2.10 | -4.04 |
| YNR002C   | FUN34  | 1.00 | -1.42 | -2.33 | -4.05 |
| YJL066C   | MPM1   | 1.00 | -2.17 | -3.10 | -4.18 |
| YBL030C   | PET9   | 1.00 | -2.05 | -2.74 | -4.38 |
| YKL217W   | JEN1   | 1.00 | -1.60 | -1.72 | -4.48 |
| YOL126C   | MDH2   | 1.00 | -2.52 | -2.75 | -4.48 |
| YLR120C   | YPS1   | 1.00 | -3.24 | -3.64 | -4.58 |
| YER065C   | ICL1   | 1.00 | -4.38 | -5.31 | -4.82 |
| YJR095W   | SFC1   | 1.00 | -4.30 | -4.56 | -4.90 |
| YGR166W   | KRE11  | 1.00 | -3.62 | -7.44 | -5.07 |
| YIL155C   | GUT2   | 1.00 | -1.79 | -2.82 | -5.09 |
| YBL015W   | ACH1   | 1.00 | -3.40 | -3.86 | -5.13 |
| YLR303W   | MET17  | 1.00 | -3.21 | -3.62 | -5.30 |
| YNR001C   | CIT1   | 1.00 | -1.99 | -2.43 | -5.77 |
| YKR097W   | PCK1   | 1.00 | -7.98 | -4.80 | -5.98 |
| YIL136W   | OM45   | 1.00 | -1.62 | -2.37 | -6.32 |
| YLR174W   | IDP2   | 1.00 | -4.51 | -7.46 | -7.84 |
| YLR304C   | ACO1   | 1.00 | -2.82 | -3.76 | -8.85 |
| YFL014W   | HSP12  | 1.00 | -1.26 | -2.07 | -9.47 |
| YOR374W   | ALD4   | 1.00 | 1.34  | -1.80 | -9.91 |
| YAL034W-A | MTW1   |      |       |       |       |
| YAL035C-A |        |      |       |       |       |
| YAL043C-A | KRE23  |      |       |       |       |
| YAL044W-A |        |      |       |       |       |
| YAL058C-A | KRE20  |      |       |       |       |
| YAL064C-A |        |      |       |       |       |
| YAL064W-B |        |      |       |       |       |
| YAL068C   |        |      |       |       |       |
| YAL069W   |        |      |       |       |       |
| YAR002C-A | ERP1   |      |       |       |       |
| YAR066W   |        |      |       |       |       |
| YAR075W   |        |      |       |       |       |
| YBL005W-A |        |      |       |       |       |
| YBL005W-B |        |      |       |       |       |
| YBL029C-A |        |      |       |       |       |
| YBL059C-A |        |      |       |       |       |



|           |        |
|-----------|--------|
| YBL071W-A |        |
| YBL091C-A |        |
| YBL101W-A |        |
| YBL101W-B |        |
| YBL107W-A |        |
| YBL108C-A |        |
| YBR012W-A |        |
| YBR012W-B |        |
| YBR058C-A | TSC3   |
| YBR084C-A | RPL19A |
| YBR085C-A |        |
| YBR089C-A | NHP6B  |
| YBR103C-A |        |
| YBR162W-A | YSY6   |
| YBR191W-A |        |
| YBR233W-A |        |
| YBR255C-A |        |
| YCL001W-A |        |
| YCL001W-B |        |
| YCL021W-A |        |
| YCL026C-A | FRM2   |
| YCL027C-A |        |
| YCL057C-A |        |
| YCR018C-A |        |
| YCR020C-A | MAK31  |
| YCR020W-B | HTL1   |
| YCR024C-A | PMP1   |
| YCR028C-A | RIM1   |
| YCR038W-A |        |
| YCR073W-A | SOL2   |
| YCR087C-A |        |
| YCR097W-A |        |
| YCR102W-A |        |
| YDL045W-A | MRP10  |
| YDL085C-A |        |
| YDL114W-A |        |
| YDL130W-A | STF1   |
| YDL133C-A | RPL41B |
| YDL159W-A |        |
| YDL185C-A |        |
| YDL240C-A |        |
| YDL247W-A |        |
| YDR034C-A |        |
| YDR034C-C |        |
| YDR034C-D |        |
| YDR034W-B |        |
| YDR079C-A |        |
| YDR098C-A |        |
| YDR098C-B |        |
| YDR170W-A |        |
| YDR179W-A |        |
| YDR210W-A |        |
| YDR210W-B |        |
| YDR210W-C |        |
| YDR210W-D |        |
| YDR235W   | PRP42  |
| YDR236C   | FMN1   |
| YDR237W   | MRPL7  |
| YDR238C   | SEC26  |
| YDR239C   |        |
| YDR240C   | SNU56  |

|           |        |
|-----------|--------|
| YDR241W   | BUD26  |
| YDR242W   | AMD2   |
| YDR243C   | PRP28  |
| YDR244W   | PEX5   |
| YDR245W   | MNN10  |
| YDR246W   | TRS23  |
| YDR247W   |        |
| YDR248C   |        |
| YDR261C-C |        |
| YDR261C-D |        |
| YDR261W-A |        |
| YDR261W-B |        |
| YDR316W-A |        |
| YDR316W-B |        |
| YDR320C-A |        |
| YDR322C-A | TIM11  |
| YDR363W-A | SEM1   |
| YDR365W-A |        |
| YDR365W-B |        |
| YDR379C-A |        |
| YDR381C-A |        |
| YDR525W-A | SNA2   |
| YEL017C-A | PMP2   |
| YEL020W-A | TIM9   |
| YEL059C-A | SOM1   |
| YEL076C-A |        |
| YEL076W-C |        |
| YER007C-A |        |
| YER014C-A | BUD25  |
| YER019C-A | SBH2   |
| YER039C-A |        |
| YER044C-A | MEI4   |
| YER048W-A |        |
| YER053C-A |        |
| YER056C-A | RPL34A |
| YER060W-A | FCY22  |
| YER066C-A |        |
| YER074W-A |        |
| YER087C-A | SBH1   |
| YER091C-A |        |
| YER093C-A |        |
| YER119C-A |        |
| YER137C-A |        |
| YER138W-A |        |
| YER159C-A |        |
| YER187W-A | KHS1   |
| YFL002W-A |        |
| YFL002W-B |        |
| YFL010W-A | AUA1   |
| YFL013W-A |        |
| YFL017W-A | SMX2   |
| YFL034C-A | RPL22B |
| YFL034C-B | MOB2   |
| YFR012W-A |        |
| YFR024C-A | LSB3   |
| YFR031C-A | RPL2A  |
| YFR032C-A | RPL29  |
| YGL226C-A | OST5   |
| YGL258W-A |        |
| YGR027W-A |        |
| YGR027W-B |        |

|           |        |
|-----------|--------|
| YGR038C-A |        |
| YGR038C-B |        |
| YGR109W-A |        |
| YGR109W-B |        |
| YGR122C-A |        |
| YGR161C-C |        |
| YGR161C-D |        |
| YGR161W-A |        |
| YGR161W-B |        |
| YGR271C-A |        |
| YHL009W-A |        |
| YHL009W-B |        |
| YHR001W-A | QCR10  |
| YHR005C-A | MRS11  |
| YHR021W-A | ECM12  |
| YHR039C-A | VMA10  |
| YHR049C-A |        |
| YHR072W-A | NOP10  |
| YHR079C-A | SAE3   |
| YHR132W-A |        |
| YHR139C-A |        |
| YHR143W-A | RPC10  |
| YHR214C-B |        |
| YHR214C-C |        |
| YHR214W-A |        |
| YIL009C-A | EST3   |
| YIL015C-A |        |
| YIL082W-A |        |
| YIR020W-B |        |
| YJL012C-A |        |
| YJL052C-A |        |
| YJL062W-A |        |
| YJL127W-A |        |
| YJL156W-A |        |
| YJL205C-A | NCE101 |
| YJR010C-A | SPC1   |
| YJR094W-A | RPL43B |
| YJR135W-A | TIM8   |
| YKL003W-A |        |
| YKL006C-A | SFT1   |
| YKL018C-A |        |
| YKL033W-A |        |
| YKL053C-A |        |
| YKL096W-A | CWP2   |
| YKL106C-A |        |
| YKL162C-A |        |
| YKL165C-A |        |
| YKR035W-A | DID2   |
| YLL018C-A | COX19  |
| YLR035C-A |        |
| YLR099W-A |        |
| YLR149C-A |        |
| YLR157C-A |        |
| YLR157C-B |        |
| YLR227W-A |        |
| YLR227W-B |        |
| YLR256W-A |        |
| YLR262C-A |        |
| YLR287C-A | RPS30A |
| YLR312W-A | MRPL15 |
| YLR363W-A |        |

|           |        |
|-----------|--------|
| YLR390W-A | CCW14  |
| YLR410W-A |        |
| YLR410W-B |        |
| YLR438C-A | LSM3   |
| YML007C-A |        |
| YML009C   | MRPL39 |
| YML010C-B |        |
| YML010W-A |        |
| YML013C-A |        |
| YML017W   | PSP2   |
| YML024W   | RPS17A |
| YML025C   |        |
| YML026C   | RPS18B |
| YML035C-A |        |
| YML036W   |        |
| YML039W   |        |
| YML045W-A |        |
| YML048W-A |        |
| YML052W   | SUR7   |
| YML056C   | IMD4   |
| YML058C-A |        |
| YML058W-A | HUG1   |
| YML067C   | ERV41  |
| YML073C   | RPL6A  |
| YML081C-A | ATP18  |
| YML085C   | TUB1   |
| YML086C   | ALO1   |
| YML094W   | GIM5   |
| YML095C-A |        |
| YML100W-A |        |
| YML102C-A |        |
| YML117W-A |        |
| YML124C   | TUB3   |
| YML133C   |        |
| YMR006C   | PLB2   |
| YMR013W-A |        |
| YMR031W-A |        |
| YMR033W   | ARP9   |
| YMR045C   |        |
| YMR046W-A |        |
| YMR050C   |        |
| YMR052C-A |        |
| YMR060C   | TOM37  |
| YMR062C   | ECM40  |
| YMR075C-A |        |
| YMR079W   | SEC14  |
| YMR084W   |        |
| YMR085W   |        |
| YMR086C-A |        |
| YMR116C   | ASC1   |
| YMR117C   | SPC24  |
| YMR119W-A |        |
| YMR120C   | ADE17  |
| YMR122W-A |        |
| YMR135W-A |        |
| YMR142C   | RPL13B |
| YMR143W   | RPS16A |
| YMR153C-A |        |
| YMR158C-B |        |
| YMR158W-A |        |
| YMR166C   |        |

|           |        |
|-----------|--------|
| YMR169C   | ALD3   |
| YMR172C-A |        |
| YMR173W-A |        |
| YMR174C   | PAI3   |
| YMR175W   | SIP18  |
| YMR193C-A |        |
| YMR194C-A |        |
| YMR194W   | RPL36A |
| YMR201C   | RAD14  |
| YMR225C   | MRPL44 |
| YMR230W   | RPS10B |
| YMR244C-A |        |
| YMR251W-A | HOR7   |
| YMR254C   |        |
| YMR256C   | COX7   |
| YMR273C   | ZDS1   |
| YMR286W   | MRPL33 |
| YMR290W-A |        |
| YMR292W   | GOT1   |
| YMR294W-A |        |
| YMR304C-A |        |
| YMR306C-A |        |
| YMR316C-A |        |
| YMR316C-B |        |
| YMR324C   |        |
| YNL054W-A |        |
| YNL054W-B |        |
| YNL067W-A |        |
| YNL162W-A |        |
| YNL284C-A |        |
| YNL284C-B |        |
| YNR001W-A |        |
| YNR032C-A | HUB1   |
| YNR034W-A |        |
| YOL013W-A |        |
| YOL052C-A | DDR2   |
| YOL077W-A | ATP19  |
| YOL086W-A |        |
| YOL103W-A |        |
| YOL103W-B |        |
| YOL159C-A |        |
| YOR008C-A | KIM1   |
| YOR008W-B |        |
| YOR142W-A |        |
| YOR142W-B |        |
| YOR192C-A |        |
| YOR192C-B |        |
| YOR298C-A | MBF1   |
| YOR304C-A |        |
| YOR314W-A |        |
| YOR343C-A |        |
| YOR343C-B |        |
| YOR396W   |        |
| YPL060C-A |        |
| YPL183W-A |        |
| YPL249C-A | RPL36B |
| YPL257W-A |        |
| YPL257W-B |        |
| YPR002C-A |        |
| YPR016W-A |        |
| YPR074W-A |        |

YPR133W-A      TOM5  
YPR137C-A  
YPR137C-B  
YPR158C-C  
YPR158C-D  
YPR158W-A  
YPR158W-B



Comparison of *C. albicans* and *S. cerevisiae* homologues

| <b>Candida dataset</b>  |                     |               | <b>Expression Ratio</b>          |             |            |          | <b>Saccharomyces dataset</b>     |               | <b>Expression Ratio</b>          |            |            |            | <b>Description</b>                                                         |
|-------------------------|---------------------|---------------|----------------------------------|-------------|------------|----------|----------------------------------|---------------|----------------------------------|------------|------------|------------|----------------------------------------------------------------------------|
| <b>C. albicans gene</b> |                     |               | <b>Glucose Concentration (%)</b> |             |            |          | <b>S. cerevisiae gene homolo</b> |               | <b>Glucose Concentration (%)</b> |            |            |            |                                                                            |
| <b>Systematic</b>       | <b>orf19 Number</b> | <b>Common</b> | <b>0</b>                         | <b>0.01</b> | <b>0.1</b> | <b>1</b> | <b>Systematic</b>                | <b>Common</b> | <b>0.0</b>                       | <b>0.0</b> | <b>0.1</b> | <b>1.0</b> |                                                                            |
| CA0002                  | orf19.12523         | DOC1          | -1.0                             | -1.1        | -1.0       | -1.1     | YGL240W                          | DOC1          | 1.0                              | -1.2       | 1.1        | 1.2        | component of the anaphase promoting complex (by homology)                  |
| CA0005                  | orf19.2414          | IPF14994      | -1.0                             | 1.2         | 1.2        | 1.2      | YJL066C                          | MPM1          | 1.0                              | -2.2       | -3.1       | -4.2       | unknown function                                                           |
| CA0006                  | orf19.11561         | IPF2072       | 1.0                              | 1.0         | -1.0       | -1.0     | YDR279W                          |               | 1.0                              | 1.4        | 1.4        | -1.0       | unknown function                                                           |
| CA0010                  | orf19.7790          | IPF16036      | 1.1                              | 1.2         | 1.3        | 1.2      | YJL143W                          | TIM17         | 1.0                              | -1.3       | -1.3       | 1.0        | similar to Saccharomyces cerevisiae Tim17p mitochondrial inner membr       |
| CA0011                  | orf19.73            | IPF17430      | -1.0                             | -1.0        | -1.2       | -1.1     | YIL137C                          |               | 1.0                              | -1.2       | -1.0       | -1.0       | possible zinc protease (by homology)                                       |
| CA0012                  | orf19.13439         | IPF19448      | -1.2                             | -1.2        | -1.2       | -1.3     | YNR008W                          | LRO1          | 1.0                              | 1.0        | -1.3       | -1.1       | similar to Saccharomyces cerevisiae Lro1p lecithin cholesterol acyltransf  |
| CA0013                  | orf19.4548          | MAK32         | 1.1                              | 1.1         | 1.1        | 1.0      | YCR019W                          | MAK32         | 1.0                              | -1.1       | -1.1       | 1.1        | sugar kinase (by homology)                                                 |
| CA0019                  |                     | IPF17799      | -1.0                             | -1.0        | -1.0       | -1.0     | YBR151W                          | APD1          | 1.0                              | -1.7       | -1.6       | -1.6       | unknown function                                                           |
| CA0020                  | orf19.124           | IPF7046       | 1.1                              | 1.0         | -1.0       | -1.0     | YHR052W                          |               | 1.0                              | -1.1       | -1.1       | -1.1       | unknown function                                                           |
| CA0026                  |                     | IPF16843      | -1.1                             | -1.1        | 1.1        | -1.1     | YGR127W                          |               | 1.0                              | -1.0       | -1.1       | 1.0        | unknown function                                                           |
| CA0027                  | orf19.1886          | RCL1          | -1.1                             | -1.1        | -1.1       | -1.1     | YOL010W                          | RCL1          | 1.0                              | 1.3        | 1.1        | 1.1        | RNA 3'-terminal phosphate cyclase (by homology)                            |
| CA0029                  | orf19.182           | PET56         | -1.0                             | 1.0         | -1.1       | -1.1     | YOR201C                          | PET56         | 1.0                              | -1.7       | -1.1       | 1.2        | ribosomal RNA methylase (by homology)                                      |
| CA0030                  | orf19.7710          | IPF17790      | -1.5                             | -1.4        | -1.8       | -1.6     | YML091C                          | RPM2          | 1.0                              | -1.2       | -1.2       | -1.8       | unknown function                                                           |
| CA0031                  | orf19.227           | COX7          | 1.0                              | -1.0        | 1.0        | 1.1      | YMR256C                          | COX7          |                                  |            |            |            | Subunit VII of cytochrome c oxidase (by homology)                          |
| CA0032                  | orf19.229           | IPF15248      | -1.0                             | 1.0         | 1.0        | 1.0      | YOL054W                          |               | 1.0                              | -1.1       | 1.0        | -1.1       | zinc finger protein (by homology)                                          |
| CA0035                  | orf19.10011         | PRC3          | -1.1                             | -1.1        | -1.0       | -1.1     | YBR139W                          |               | 1.0                              | -1.1       | -1.2       | -1.3       | Carboxypeptidase Y precursor (by homology)                                 |
| CA0038                  | orf19.1770          | CYC1          | 1.2                              | 1.2         | 1.3        | 1.4      | YJR048W                          | CYC1          | 1.0                              | -1.5       | -1.5       | -2.3       | cytochrome-c isoform 1                                                     |
| CA0041                  | orf19.3804          | IPF10360      | 1.1                              | 1.3         | 1.3        | 1.1      | YMR134W                          |               | 1.0                              | 1.2        | 1.2        | -1.0       | unknown function                                                           |
| CA0043                  | orf19.719           | HRD1          | -1.3                             | 1.0         | -1.1       | 1.0      | YOL013C                          | HRD1          | 1.0                              | 1.1        | 1.3        | 1.2        | Involved in degradation of Hmg2p                                           |
| CA0047                  | orf19.2538          | PTC2          | -1.1                             | -1.0        | 1.0        | -1.0     | YER089C                          | PTC2          | 1.0                              | -1.4       | -1.1       | -1.0       | Protein phosphatase type 2C (by homology)                                  |
| CA0048                  | orf19.3599          | TIF4631       | 1.0                              | -1.2        | -1.5       | -1.4     | YGR162W                          | TIF4631       | 1.0                              | -1.4       | 1.1        | 1.1        | mRNA cap-binding protein (by homology)                                     |
| CA0049                  | orf19.757           | IPF3908       | -1.2                             | -1.0        | -1.2       | -1.0     | YPR090W                          |               | 1.0                              | -1.0       | 1.2        | 1.1        | unknown function                                                           |
| CA0052                  | orf19.379           | IPF19567      | 1.0                              | -1.2        | -1.1       | -1.1     | YHR085W                          |               | 1.0                              | -1.4       | -1.7       | -1.4       | Unknown function                                                           |
| CA0054                  |                     | RIB4.3        | 1.2                              | -1.0        | -1.0       | -1.1     | YOL143C                          | RIB4          | 1.0                              | 1.2        | 1.4        | 1.2        | 6,7-dimethyl-8-ribityllumazine synthase, 3-prime end (by homology)         |
| CA0055                  | orf19.10917         | IPF12442      | 1.1                              | 1.2         | 1.3        | 1.1      | YML052W                          | SUR7          |                                  |            |            |            | unknown function                                                           |
| CA0057                  |                     | IPF3767       | 1.1                              | -1.2        | -1.2       | -1.0     | YPR143W                          |               | 1.0                              | 1.2        | 1.6        | 1.6        | unknown function                                                           |
| CA0060                  | orf19.1699          | IPF13661      | 1.0                              | -1.1        | -1.1       | 1.0      | YHR114W                          | BZZ1          | 1.0                              | 1.1        | 1.2        | 1.1        | unknown function                                                           |
| CA0068                  | orf19.121           | ARC18         | 1.2                              | 1.1         | 1.1        | 1.1      | YLR370C                          | ARC18         | 1.0                              | -1.1       | -1.2       | -1.2       | subunit of the Arp2/3 complex involved in the control of actin polymerizat |
| CA0079                  | orf19.4730          | IPF14323      | 1.0                              | -1.0        | 1.0        | -1.0     | YNL050C                          |               | 1.0                              | 1.1        | 1.1        | 1.1        | unknown function                                                           |
| CA0084                  | orf19.12976         | NAB3          | -1.1                             | -1.1        | -1.2       | -1.1     | YPL190C                          | NAB3          | 1.0                              | 1.1        | 1.7        | 1.7        | polyadenylated RNA-binding protein (by homology)                           |
| CA0086                  | orf19.7781          | IPF16598      | -1.0                             | 1.4         | 1.3        | 1.5      | YBR042C                          |               | 1.0                              | 1.2        | 1.3        | 1.3        | unknown function                                                           |
| CA0088                  | orf19.579           | IPF7349       | -1.3                             | -1.2        | -1.6       | -1.3     | YNL256W                          | FOL1          | 1.0                              | 1.0        | 1.2        | 1.2        | similar to Saccharomyces cerevisiae Fol1p dihydroneopterin aldolase, di    |
| CA0089                  | orf19.5064          | MRPL3         | -1.0                             | -1.2        | -1.0       | -1.1     | YMR024W                          | MRPL3         | 1.0                              | 1.1        | 1.1        | 1.0        | ribosomal protein of the large subunit, mitochondrial (by homology)        |
| CA0090                  | orf19.2026          | UBP13         | -1.1                             | 1.0         | -1.1       | -1.0     | YER098W                          | UBP9          | 1.0                              | -1.4       | -1.3       | -1.0       | ubiquitin carboxyl-terminal hydrolase (by homology)                        |
| CA0094                  | orf19.3213          | IPF12819      | 1.0                              | 1.0         | 1.0        | -1.0     | YDR474C                          |               | 1.0                              | 1.1        | 1.2        | 1.3        | unknown function                                                           |
| CA0095                  | orf19.3468          | ALG11         | -1.1                             | -1.4        | -1.4       | -1.3     | YNL048W                          | ALG11         | 1.0                              | -1.2       | 1.1        | 1.1        | required for asparagine-linked oligosaccharide assembly (by homology)      |
| CA0096                  | orf19.751           | IPF13409      | -1.0                             | 1.0         | 1.0        | 1.0      | YJL149W                          |               | 1.0                              | 1.1        | 1.0        | 1.2        | unknown function                                                           |
| CA0098                  | orf19.2319          | IPF16479      | -1.2                             | -2.1        | -2.3       | -2.1     | YDR365C                          |               | 1.0                              | -2.5       | -1.4       | -1.3       | unknown function                                                           |
| CA0101                  | orf19.232           | IPF10105      | 1.1                              | 1.0         | 1.1        | -1.0     | YOL135C                          | MED7          | 1.0                              | 1.0        | 1.1        | 1.1        | RNA polymerase-like (by homology)                                          |
| CA0102                  | orf19.736           | IPF16695      | -1.3                             | -1.1        | -1.5       | -1.3     | YCR081W                          | SRB8          | 1.0                              | 1.0        | 1.0        | 1.1        | unknown function                                                           |
| CA0107                  | orf19.5183          | POL3.5EOC     | -1.2                             | -1.4        | -2.7       | -1.7     | YDL102W                          | CDC2          | 1.0                              | 1.3        | -1.1       | -1.1       | DNA Polymerase III, 5-prime end                                            |
| CA0111                  | orf19.4151          | IPF16830      | -1.0                             | 1.0         | 1.0        | 1.0      | YNL012W                          | SPO1          | 1.0                              | -1.9       | -1.6       | -1.5       | similar to Saccharomyces cerevisiae Spo1p transcriptional regulator invo   |
| CA0112                  | orf19.5754          | IPF17358      | -1.0                             | 1.2         | 1.5        | 1.3      | YLR023C                          |               | 1.0                              | 1.1        | 1.4        | 1.4        | unknown function                                                           |
| CA0113                  | orf19.9938          | AUT2          | 1.0                              | 1.1         | 1.1        | 1.0      | YNL223W                          | AUT2          | 1.0                              | -1.1       | -1.2       | -1.3       | anchor protein mediateing attachment of autophagosomes to microtubule      |
| CA0114                  | orf19.9939          | SSU72         | -1.0                             | 1.0         | -1.0       | 1.0      | YNL222W                          | SSU72         | 1.0                              | -1.0       | 1.0        | -1.2       | suppressor of cs mutant of sua7 (by homology)                              |
| CA0117                  | orf19.916           | IPF19231      | 1.2                              | 1.1         | 1.4        | 1.5      | YNL305C                          |               | 1.0                              | 1.2        | 1.2        | -1.3       | unknown function                                                           |
| CA0118                  |                     | IPF16430.3    | 1.1                              | -1.1        | -1.0       | 1.1      | YFR033C                          | QCR6          | 1.0                              | 1.3        | 1.1        | -1.6       | similar to Saccharomyces cerevisiae Qcr6p ubiquinol-cytochrome-c redu      |
| CA0119                  | orf19.920           | RMT2          | -1.1                             | -1.0        | -1.2       | -1.2     | YDR465C                          | RMT2          | 1.0                              | -1.0       | 1.0        | 1.2        | N-delta-arginine methyltransferase (by homology)                           |
| CA0120                  |                     | IPF19593      | -1.1                             | -1.2        | -1.2       | -1.1     | YPL020C                          | ULP1          | 1.0                              | -1.1       | -1.1       | -1.1       | similar to Saccharomyces cerevisiae Ulp1p Smt3-processing enzyme (by       |
| CA0121                  | orf19.983           | IPF17048      | -1.0                             | -1.0        | -1.1       | -1.0     | YOR322C                          |               | 1.0                              | 1.0        | 1.1        | 1.2        | unknown function                                                           |
| CA0122                  | orf19.13191         | SNF4          | -1.0                             | 1.3         | 1.3        | 1.4      | YGL115W                          | SNF4          | 1.0                              | 1.1        | -1.1       | -1.1       | Nuclear regulatory protein (by homology).                                  |
| CA0123                  | orf19.9576          | MXR1          | 1.0                              | 1.2         | 1.2        | 1.2      | YER042W                          | MXR1          | 1.0                              | -1.1       | 1.1        | -1.2       | methionine sulfoxide reductase                                             |
| CA0124                  | orf19.9577          | RFC5          | -1.0                             | 1.1         | 1.0        | 1.1      | YBR087W                          | RFC5          | 1.0                              | 1.1        | 1.1        | 1.1        | DNA replication factor C (by homology)                                     |
| CA0126                  | orf19.8177          | IPF4284       | 1.1                              | 1.1         | 1.2        | 1.1      | YOL026C                          |               | 1.0                              | -1.1       | 1.0        | 1.0        | unknown function                                                           |
| CA0127                  | orf19.8176          | HXK2.3F       | -1.1                             | 9.5         | 9.7        | 7.9      | YGL253W                          | HXK2          | 1.0                              | -1.1       | 1.4        | 1.4        | hexokinase II, 3-prime end (by homology)                                   |

|        |                |              |      |      |      |      |         |     |      |      |      |                                                                                  |
|--------|----------------|--------------|------|------|------|------|---------|-----|------|------|------|----------------------------------------------------------------------------------|
| CA0129 | orf19.246      | IPF10495     | 1.1  | -1.0 | -1.0 | 1.1  | YIL108W | 1.0 | 1.1  | 1.1  | 1.3  | unknown function                                                                 |
| CA0130 | orf19.3533     | IPF4470      | 1.1  | 1.0  | 1.1  | 1.0  | YDR512C | 1.0 | -1.0 | 1.1  | 1.0  | unknown function                                                                 |
| CA0131 | orf19.36       | IPF13402     | 1.0  | -1.0 | 1.0  | -1.0 | YML071C | 1.0 | -1.3 | 1.1  | 1.2  | unknown function                                                                 |
| CA0132 | orf19.2361     | SPT10        | -1.1 | -1.0 | 1.1  | -1.0 | YJL127C | 1.0 | -1.3 | -1.1 | -1.1 | Transcription regulatory protein (by homology)                                   |
| CA0133 | orf19.1007     | IPF3746      | 1.0  | 1.0  | 1.0  | 1.0  | YDR017C | 1.0 | 1.0  | 1.0  | 1.2  | unknown function                                                                 |
| CA0139 | orf19.14182    | RUD3         | -1.1 | -1.3 | -1.5 | -1.2 | YOR216C | 1.0 | 1.0  | -1.1 | -1.1 | Suppressor of uso1-1 transport defect (by homology)                              |
| CA0140 | orf19.10097    | MDM1.3       | -1.2 | -1.3 | -1.4 | -1.3 | YML104C | 1.0 | -1.7 | -1.4 | -1.8 | intermediate filament protein, 3-prime end (by homology)                         |
| CA0142 | orf19.1026     | CSL4         | 1.1  | 1.0  | 1.1  | 1.0  | YNL232W | 1.0 | 1.0  | 1.3  | 1.1  | Involved in kinetochore-related function (by homology)                           |
| CA0144 | orf19.151      | IPF19195.3F  | -1.0 | 1.0  | 1.0  | 1.0  | YKL174C | 1.0 | -1.2 | -1.1 | -1.0 | putative amino acid or GABA permease, 3-prime end (by homology)                  |
| CA0147 | orf19.11133    | IPF9690      | 1.1  | 1.1  | 1.1  | 1.1  | YBR101C | 1.0 | -1.3 | -1.0 | 1.1  | unknown function                                                                 |
| CA0148 | orf19.2404     | POP1         | -1.0 | -1.0 | -1.0 | 1.0  | YNL221C | 1.0 | 1.0  | 1.0  | 1.6  | protein component of ribonuclease P and ribonuclease MRP (by homology)           |
| CA0149 | orf19.6243     | VPS34        | -1.1 | -1.0 | -1.1 | -1.0 | YLR240W | 1.0 | -1.5 | -1.2 | -1.0 | 1-phosphatidylinositol 3-kinase                                                  |
| CA0150 | orf19.10236    | CDC123       | -1.1 | 1.1  | 1.3  | 1.0  | YLR215C | 1.0 | -2.1 | -2.4 | -2.5 | similar to Saccharomyces cerevisiae Cdc123p cell cycle regulator (by homology)   |
| CA0154 | orf19.4433     | CPH1         | 1.0  | 1.1  | -1.1 | -1.1 | YHR084W | 1.0 | 1.3  | 1.1  | 1.5  | Transcription factor                                                             |
| CA0155 | orf19.11075    | RPT6         | -1.1 | 1.0  | -1.1 | -1.0 | YGL048C | 1.0 | -1.5 | -1.1 | 1.1  | 26S proteasome regulatory subunit (by homology)                                  |
| CA0156 | orf19.9345     | SCW4         | 1.5  | 1.3  | 1.3  | 1.4  | YGR279C | 1.0 | 1.2  | 1.6  | 1.8  | glucanase (by homology)                                                          |
| CA0161 | orf19.10177    | RMS1         | -1.0 | 1.2  | 1.4  | 1.2  | YDR257C | 1.0 | -1.0 | -1.2 | 1.1  | (putative) transcriptional regulator (by homology)                               |
| CA0164 | orf19.4335     | IPF11694     | 1.0  | 1.0  | -1.0 | -1.0 | YGR260W | 1.0 | 1.1  | 1.2  | 2.9  | similar to Saccharomyces cerevisiae Tna1p high affinity nicotinic acid pla       |
| CA0174 | orf19.1182.3EO | IPF11182.3EO | -1.2 | -1.0 | -1.3 | -1.1 | YLR106C | 1.0 | -1.9 | -1.9 | -1.7 | unknown function, 3-prime end                                                    |
| CA0175 | orf19.9970     | NPL4         | -1.4 | 1.1  | 1.1  | -1.0 | YBR170C | 1.0 | -1.2 | -1.2 | -1.0 | nuclear protein localization factor and ER translocation component (by homology) |
| CA0176 | orf19.8267     | IPF11388     | -1.1 | -1.0 | -1.1 | -1.1 | YER041W | 1.0 | -1.3 | -1.0 | -2.3 | unknown function                                                                 |
| CA0178 | orf19.12707    | CDC6         | -1.0 | 1.0  | 1.1  | 1.1  | YJL194W | 1.0 | -1.3 | -1.0 | 1.1  | Cell division control protein                                                    |
| CA0179 | orf19.423      | DCP1         | 1.0  | 1.0  | 1.1  | 1.0  | YOL149W | 1.0 | 1.1  | -1.0 | -1.1 | mRNA decapping enzyme (by homology)                                              |
| CA0180 | orf19.422      | SPT20        | 1.0  | -1.0 | -1.0 | -1.1 | YOL148C | 1.0 | -1.7 | -1.6 | -1.5 | transcription factor, member of the histone acetyltransferase SAGA               |
| CA0183 | orf19.9191     | CAP1         | -1.0 | 1.8  | 2.2  | 1.9  | YML007W | 1.0 | -2.1 | -2.1 | -2.6 | transcriptional activator (by homology)                                          |
| CA0188 | orf19.9467     | IPF15442     | 1.1  | 1.4  | 1.7  | 1.3  | YJL171C | 1.0 | -1.1 | 1.2  | 1.4  | unknown function                                                                 |
| CA0190 | orf19.11070    | IPF14773     | -1.1 | 1.0  | -1.0 | -1.0 | YBR005W | 1.0 | 1.3  | 1.2  | 1.5  | unknown function                                                                 |
| CA0191 | orf19.89       | PEX7         | 1.0  | 1.1  | 1.0  | 1.0  | YDR142C | 1.0 | -1.0 | -1.1 | 1.2  | peroxisomal import protein (by homology)                                         |
| CA0192 | orf19.1177     | IPF15134     | -1.1 | -1.0 | -1.0 | 1.0  | YNL206C | 1.0 | 1.1  | 1.1  | 1.1  | Unknown function                                                                 |
| CA0194 | orf19.11404    | IPF16228     | 1.1  | -1.0 | 1.1  | 1.0  | YGL224C | 1.0 | -1.4 | -1.3 | -1.2 | unknown function                                                                 |
| CA0195 | orf19.11403    | IPF12688     | 1.2  | 1.0  | 1.1  | -1.0 | YOR280C | 1.0 | -1.3 | -1.2 | -1.0 | unknown function                                                                 |
| CA0197 | orf19.1934     | IPF9787      | -1.3 | -1.6 | -1.9 | -1.4 | YOR025W | 1.0 | -1.1 | -1.1 | -1.1 | similar to Saccharomyces cerevisiae Hst3p silencing protein (by homology)        |
| CA0198 | orf19.9227     | IPF19685     | -1.4 | -1.5 | -1.2 | -1.1 | YHR097C | 1.0 | -1.1 | 1.1  | -1.5 | unknown function                                                                 |
| CA0199 | orf19.3556     | KAP104       | -1.1 | -1.1 | -1.0 | -1.1 | YBR017C | 1.0 | 1.1  | 1.1  | 1.0  | karyopherin-beta protein (by homology)                                           |
| CA0200 | orf19.9109     | IPF15119     | 1.1  | 1.1  | 1.4  | 1.2  | YKL175W | 1.0 | 1.2  | 1.2  | 1.2  | unknown function                                                                 |
| CA0201 | orf19.9108     | IPF15116     | -1.3 | -1.4 | -1.3 | -1.1 | YKL077W | 1.0 | -1.2 | 1.1  | 1.2  | Unknown function                                                                 |
| CA0202 | orf19.1210     | IPF19126     | 1.2  | 1.5  | 1.8  | 1.6  | YER119C | 1.0 | -1.3 | -1.4 | -1.4 | putative amino acid transporter (by homology)                                    |
| CA0203 | orf19.10724    | MID1         | -1.1 | -1.1 | -1.1 | -1.0 | YNL291C | 1.0 | -1.4 | -1.3 | -1.4 | involved in Ca2+ influx during mating (by homology)                              |
| CA0204 | orf19.1222     | IKI3         | -1.2 | -1.3 | -1.7 | -1.4 | YLR384C | 1.0 | -1.7 | -2.0 | -1.6 | killer toxin insensitive protein 3 (by homology)                                 |
| CA0205 | orf19.1223     | DBF2         | -1.1 | -1.1 | -1.2 | -1.0 | YGR092W | 1.0 | -1.3 | -1.4 | -1.3 | putative ser/thr protein kinase (by homology)                                    |
| CA0209 | orf19.1228     | HAP2         | 1.0  | 1.1  | 1.0  | -1.0 | YGL237C | 1.0 | -1.3 | -1.2 | -1.6 | CCAAT-binding factor subunit (by homology)                                       |
| CA0210 | orf19.12971    | IPF4328      | 1.1  | -1.2 | -1.1 | -1.0 | YMR315W | 1.0 | -1.1 | 1.2  | 1.1  | unknown function                                                                 |
| CA0213 | orf19.1279     | CDS1         | 1.0  | -1.1 | -1.1 | -1.1 | YBR029C | 1.0 | 1.1  | 1.0  | 1.1  | CDP-diacylglycerol synthase (by homology)                                        |
| CA0214 | orf19.1289     | SCT11        | 1.0  | 1.1  | 1.1  | 1.0  | YBL011W | 1.0 | 1.1  | 1.3  | 1.4  | Suppresses a choline-transport mutant                                            |
| CA0215 | orf19.2745     | IPF15350     | 1.1  | 1.0  | 1.0  | 1.0  | YDR207C | 1.0 | -1.6 | -1.8 | -1.5 | putative zinc finger transcription factor (by homology)                          |
| CA0217 | orf19.849      | MNN4         | 1.1  | -1.0 | 1.1  | 1.0  | YKL201C | 1.0 | -1.8 | -1.6 | -1.2 | regulates the mannosylphosphorylation (by homology)                              |
| CA0219 | orf19.3193     | YAP3         | 1.0  | 1.0  | 1.2  | 1.1  | YHL009C | 1.0 | -1.2 | -1.0 | 1.2  | transcription factor of a fungal-specific family of bzip proteins (by homology)  |
| CA0220 | orf19.1291     | ABZ1         | 1.0  | -1.1 | -1.0 | 1.0  | YNR033W | 1.0 | -1.1 | -1.1 | -1.1 | para-aminobenzoate synthase (by homology)                                        |
| CA0221 | orf19.9509     | PUS4         | 1.0  | -1.0 | -1.0 | 1.0  | YNL292W | 1.0 | -1.0 | -1.1 | -1.2 | pseudouridine synthase (by homology)                                             |
| CA0223 | orf19.1295     | VAS1         | -1.6 | -1.5 | -1.8 | -1.5 | YGR094W | 1.0 | -1.3 | -1.4 | -1.2 | valyl-tRNA synthetase (by homology)                                              |
| CA0224 | orf19.1296     | PRP31        | -1.1 | -1.1 | 1.0  | -1.1 | YGR091W | 1.0 | -1.3 | 1.1  | 1.3  | pre-mRNA splicing protein (by homology)                                          |
| CA0225 | orf19.1298     | NUP84        | -1.3 | -1.3 | -1.3 | -1.3 | YDL116W | 1.0 | -1.4 | 1.1  | -1.1 | nuclear pore protein (by homology)                                               |
| CA0227 | orf19.9328     | PHO23        | -1.1 | -1.1 | -1.0 | 1.1  | YNL097C | 1.0 | -1.2 | -1.4 | -1.4 | Involved in transcriptional regulation of PHO5 (by homology)                     |
| CA0228 | orf19.12233    | IPT1         | 1.0  | 1.1  | 1.0  | 1.0  | YDR072C | 1.0 | 1.5  | 2.0  | 2.1  | Mannosyl diphosphorylinositol ceramide (by homology)                             |
| CA0231 | orf19.1494     | RAD23        | -1.2 | -1.2 | -1.3 | 1.0  | YEL037C | 1.0 | 1.4  | 1.6  | 2.4  | nucleotide excision repair protein(ubiquitin-like protein) (by homology)         |
| CA0233 | orf19.7794     | URE2         | 1.0  | 1.0  | 1.0  | 1.0  | YNL229C | 1.0 | -1.1 | -1.1 | 1.0  | Nitrogen catabolite repression regulator (by homology)                           |
| CA0234 | orf19.7793     | IFA3         | -1.1 | -1.1 | -1.1 | -1.1 | YKR060W | 1.0 | -1.1 | -1.2 | 1.0  | unknown function                                                                 |
| CA0235 | orf19.7813     | HIS3         | 1.0  | 1.0  | 1.1  | 1.0  | YOR202W | 1.0 | -1.3 | -1.2 | 1.1  | imidazole glycerol phosphate dehydratase                                         |
| CA0236 | orf19.7814     | MDM10        | 1.0  | -1.0 | -1.0 | -1.0 | YAL010C | 1.0 | 1.0  | 1.0  | 1.0  | Involved in mitochondrial morphology and inheritance (by homology)               |
| CA0237 | orf19.7818     | IPF13416     | -1.0 | -1.1 | -1.2 | -1.0 | YAL011W | 1.0 | -1.2 | -1.1 | -1.0 | Unknown function                                                                 |
| CA0238 | orf19.7864     | PHA2.3       | 1.1  | 1.0  | 1.1  | 1.0  | YNL316C | 1.0 | 1.0  | -1.0 | -1.2 | prephenate dehydratase, 3-prime end (by homology)                                |

|        |             |                    |      |      |      |      |         |               |     |      |      |      |       |                                                                          |
|--------|-------------|--------------------|------|------|------|------|---------|---------------|-----|------|------|------|-------|--------------------------------------------------------------------------|
| CA0239 | orf19.236   | <i>RPL9B</i>       | 1.4  | -1.3 | 1.1  | 1.0  | YNL067W | <i>RPL9B</i>  | 1.0 | 1.5  | 2.4  | 2.4  | RPL9B | ribosomal protein L9 by homology                                         |
| CA0241 | orf19.3470  | <i>IPF15630</i>    | -1.1 | -1.1 | -1.2 | -1.1 | YPL207W |               | 1.0 | -1.2 | 1.2  | 1.1  |       | unknown function                                                         |
| CA0243 | orf19.5869  | <i>BSD2</i>        | -1.1 | -1.1 | -1.1 | -1.0 | YBR290W | <i>BSD2</i>   | 1.0 | -1.1 | -1.1 | -1.0 |       | Metal homeostasis protein (by homology)                                  |
| CA0245 | orf19.13042 | <i>POL5</i>        | -1.6 | -1.5 | -2.0 | -1.5 | YEL055C | <i>POL5</i>   | 1.0 | -1.8 | -1.1 | 1.1  |       | DNA polymerase V (by homology)                                           |
| CA0253 | orf19.477   | <i>FIL1</i>        | 1.0  | 1.0  | -1.0 | -1.0 | YHR038W | <i>FIL1</i>   | 1.0 | -2.1 | -1.5 | -1.6 |       | Putative mitochondrial ribosome recycling factor (by homology)           |
| CA0256 | orf19.2278  | <i>IPF10309</i>    | -1.2 | 1.2  | 1.1  | 1.3  | YKL206C |               | 1.0 | 1.0  | 1.2  | 1.0  |       | unknown function                                                         |
| CA0258 | orf19.1356  | <i>IPF17112</i>    | -1.1 | -1.1 | -1.2 | -1.1 | YOR251C |               | 1.0 | 1.1  | 1.2  | 1.3  |       | thiosulfate sulfurtransferase (by homology)                              |
| CA0259 | orf19.1355  | <i>SOL1</i>        | -1.2 | -1.0 | -1.0 | 1.1  | YNR034W | <i>SOL1</i>   | 1.0 | 1.3  | 1.4  | 1.1  |       | multicopy suppressor of los1-1                                           |
| CA0261 | orf19.8394  | <i>LYS22</i>       | -1.0 | 1.3  | 1.5  | 1.1  | YDL131W | <i>LYS21</i>  | 1.0 | 1.2  | 2.1  | 4.8  |       | Homocitrate synthase (by homology)                                       |
| CA0262 | orf19.1407  | <i>IPF20054</i>    | -1.0 | 1.2  | 1.7  | 1.2  | YBR287W |               | 1.0 | 1.3  | 1.3  | 1.5  |       | unknown function                                                         |
| CA0263 | orf19.1408  | <i>GLK1</i>        | -1.2 | 1.0  | 1.0  | 1.1  | YCL040W | <i>GLK1</i>   | 1.0 | 1.6  | 1.0  | -1.8 |       | aldohexose specific glucokinase (by homology)                            |
| CA0265 | orf19.10702 | <i>STI1</i>        | -1.6 | -1.4 | -1.6 | -1.5 | YOR027W | <i>STI1</i>   | 1.0 | -1.1 | 1.5  | 1.3  |       | stress-induced protein (by homology)                                     |
| CA0268 | orf19.4262  | <i>UZF2.EXON2</i>  | -1.3 | -1.1 | -1.1 | -1.2 | YJR091C | <i>JSN1</i>   | 1.0 | -1.1 | -1.1 | -1.0 |       | RNA-binding protein, exon 2 (by homology)                                |
| CA0272 | orf19.1434  | <i>DPB11</i>       | -1.1 | -1.3 | -1.4 | -1.1 | YJL090C | <i>DPB11</i>  | 1.0 | 1.0  | -1.2 | 1.0  |       | DNA polymerase II complex (by homology)                                  |
| CA0275 | orf19.8470  | <i>NTA1</i>        | 1.0  | 1.0  | 1.1  | -1.0 | YJR062C | <i>NTA1</i>   | 1.0 | -1.1 | -1.0 | -1.1 |       | Amino-terminal amidase (by homology)                                     |
| CA0280 | orf19.1439  | <i>IPF10566</i>    | -1.1 | -1.0 | 1.1  | -1.1 | YDR315C | <i>IPK1</i>   | 1.0 | 1.0  | 1.2  | 1.2  |       | unknown function                                                         |
| CA0290 | orf19.1591  | <i>POT14</i>       | -1.2 | -3.4 | -2.9 | -3.2 | YPL028W | <i>ERG10</i>  | 1.0 | 1.5  | 2.5  | 2.0  |       | acetyl-CoA acetyltransferase (by homology)                               |
| CA0291 | orf19.1592  | <i>IPF13328</i>    | 1.0  | -1.1 | 1.0  | 1.1  | YPL041C |               | 1.0 | -1.6 | -1.1 | -1.0 |       | unknown function                                                         |
| CA0293 | orf19.6489  | <i>IPF6624</i>     | 1.0  | 1.1  | 1.1  | 1.1  | YDL222C |               | 1.0 | 2.2  | 1.5  | -2.1 |       | unknown function                                                         |
| CA0294 | orf19.9322  | <i>IPF16061</i>    | -1.0 | -1.1 | -1.0 | -1.1 | YOR243C |               | 1.0 | -1.0 | 1.1  | 1.8  |       | unknown function                                                         |
| CA0295 | orf19.1595  | <i>IPF15033</i>    | 1.0  | 1.0  | 1.1  | 1.0  | YDL091C |               | 1.0 | -1.4 | -1.3 | -1.2 |       | unknown function                                                         |
| CA0297 | orf19.1674  | <i>CDC53</i>       | -1.3 | -1.2 | -1.3 | 1.1  | YDL132W | <i>CDC53</i>  | 1.0 | -1.2 | 1.1  | 1.5  |       | Cell division control protein (by homology)                              |
| CA0298 | orf19.1673  | <i>PPT1</i>        | -1.1 | -1.0 | -1.0 | -1.0 | YGR123C | <i>PPT1</i>   | 1.0 | 1.0  | 1.2  | 1.8  |       | Protein ser/thr phosphatase                                              |
| CA0299 | orf19.1597  | <i>IPF3765</i>     | -1.1 | -1.3 | -1.1 | -1.1 | YGR106C |               | 1.0 | 1.5  | 1.4  | 1.2  |       | unknown function                                                         |
| CA0300 | orf19.1598  | <i>ERG24</i>       | 1.1  | -1.3 | -1.3 | -1.3 | YNL280C | <i>ERG24</i>  | 1.0 | -1.2 | 1.1  | 1.1  |       | C-14 sterol reductase (by homology)                                      |
| CA0302 | orf19.9181  | <i>MEP3</i>        | -1.0 | 3.0  | 4.3  | 4.0  | YPR138C | <i>MEP3</i>   | 1.0 | -1.1 | 1.2  | 1.1  |       | low affinity high capacity ammonium permease (by homology)               |
| CA0304 | orf19.8340  | <i>IPF12829</i>    | -1.0 | -1.1 | -1.1 | -1.1 | YLL035W | <i>GRC3</i>   | 1.0 | -1.8 | -1.9 | -1.9 |       | unknown function                                                         |
| CA0305 | orf19.1734  | <i>INO80</i>       | -1.1 | -1.0 | -1.1 | 1.1  | YGL150C | <i>INO80</i>  | 1.0 | 1.2  | 1.3  | 1.4  |       | DNA helicase (by homology)                                               |
| CA0306 | orf19.1742  | <i>HEM3</i>        | 1.3  | 1.2  | 1.5  | 1.3  | YDL205C | <i>HEM3</i>   | 1.0 | 1.3  | 1.1  | 1.2  |       | porphobilinogen deaminase                                                |
| CA0307 | orf19.3736  | <i>IPF4719</i>     | 1.0  | 1.0  | 1.1  | 1.0  | YCL055W | <i>KAR4</i>   | 1.0 | -1.1 | -1.1 | 1.1  |       | similar to Saccharomyces cerevisiae Kar4p regulatory protein required fo |
| CA0308 | orf19.8693  | <i>RHK1</i>        | 1.0  | -1.0 | 1.0  | 1.1  | YBL082C | <i>RHK1</i>   | 1.0 | -1.0 | -1.1 | 1.0  |       | Mannosyltransferase (by homology)                                        |
| CA0309 | orf19.1091  | <i>IPF16935</i>    | -1.0 | 1.0  | -1.0 | 1.0  | YOL144W | <i>NOP8</i>   | 1.0 | 1.0  | 1.5  | 1.3  |       | unknown function                                                         |
| CA0310 | orf19.8690  | <i>PEX11</i>       | 1.6  | -2.2 | -2.0 | -2.5 | YOL147C | <i>PEX11</i>  | 1.0 | 1.0  | 1.0  | -1.2 |       | peroxisomal membrane protein - peroxin by homology                       |
| CA0312 | orf19.8211  | <i>IPF6396</i>     | 1.2  | -1.0 | 1.1  | -1.0 | YNL254C |               | 1.0 | -1.1 | -1.0 | -1.0 |       | unknown function                                                         |
| CA0317 | orf19.3959  | <i>SSD1</i>        | 1.1  | 1.2  | 1.5  | 1.3  | YDR293C | <i>SSD1</i>   | 1.0 | -1.7 | -1.3 | 1.1  |       | Protein phosphatase (by homology)                                        |
| CA0318 | orf19.3957  | <i>FOL2</i>        | -1.0 | -1.0 | -1.1 | -1.1 | YGR267C | <i>FOL2</i>   | 1.0 | -1.1 | -1.0 | 1.1  |       | GTP cyclohydrolase (by homology)                                         |
| CA0321 | orf19.7861  | <i>APL2</i>        | -1.2 | -1.1 | 1.0  | 1.0  | YKL135C | <i>APL2</i>   | 1.0 | -1.7 | -1.6 | -2.2 |       | AP-1 complex subunit, beta1-adaptin (by homology)                        |
| CA0322 | orf19.8459  | <i>RPS9B</i>       | 1.4  | 1.1  | 1.1  | 1.2  | YPL081W | <i>RPS9A</i>  | 1.0 | 1.5  | 1.9  | 2.1  |       | Ribosomal protein                                                        |
| CA0323 | orf19.9378  | <i>CDC95</i>       | 1.1  | 1.6  | 1.6  | 1.4  | YPR016C | <i>TIF6</i>   | 1.0 | -1.5 | -1.7 | -1.6 |       | translation initiation factor 6 (eIF6) (by homology)                     |
| CA0324 | orf19.9377  | <i>STT4</i>        | -1.0 | -1.1 | -1.0 | -1.1 | YLR305C | <i>STT4</i>   | 1.0 | -1.5 | -1.4 | -1.6 |       | Phosphatidylinositol-4-kinase (by homology)                              |
| CA0328 | orf19.3778  | <i>IPF15217.3F</i> | -1.1 | -1.0 | 1.1  | -1.0 | YCR072C |               | 1.0 | 1.1  | 1.0  | 1.5  |       | WD-repeat protein, 3-prime end (by homology)                             |
| CA0329 | orf19.3777  | <i>IMG2</i>        | -1.0 | 1.0  | -1.1 | -1.0 | YCR071C | <i>IMG2</i>   | 1.0 | 1.0  | -1.0 | -1.5 |       | Required for Integrity of Mitochondrial Genome (by homology)             |
| CA0330 | orf19.797   | <i>BAT21</i>       | -1.1 | -1.1 | 1.1  | 1.0  | YJR148W | <i>BAT2</i>   | 1.0 | -1.7 | -1.0 | -1.0 |       | branched-chain amino acid transaminase (by homology)                     |
| CA0331 | orf19.798   | <i>ANC1</i>        | 1.1  | 1.0  | 1.0  | -1.0 | YPL129W | <i>ANC1</i>   | 1.0 | 1.1  | 1.3  | 1.2  |       | TFIIIF subunit, transcription initiation factor (by homology)            |
| CA0332 | orf19.12981 | <i>FEN2</i>        | 1.1  | -1.2 | -1.1 | -1.0 | YCR028C | <i>FEN2</i>   | 1.0 | -1.7 | -1.8 | -1.4 |       | allantoate permease transporter (by homology)                            |
| CA0341 | orf19.1788  | <i>XKS1</i>        | -1.1 | -1.3 | -1.4 | -1.2 | YGR194C | <i>XKS1</i>   | 1.0 | -1.4 | -1.6 | -1.5 |       | xylulokinase (by homology)                                               |
| CA0342 | orf19.1789  | <i>IPF10470</i>    | -1.1 | -1.0 | 1.0  | 1.0  | YJR003C |               | 1.0 | -1.3 | -1.3 | -1.2 |       | unknown function                                                         |
| CA0343 |             | <i>LYS1.5EOC</i>   | -1.1 | -1.3 | -1.3 | -1.4 | YIR034C | <i>LYS1</i>   | 1.0 | 1.1  | 1.1  | 1.6  |       | saccharopine dehydrogenase, 5-prime end (by homology)                    |
| CA0345 | orf19.10681 | <i>ACH1</i>        | 1.7  | -4.0 | -3.1 | -5.5 | YBL015W | <i>ACH1</i>   | 1.0 | -3.4 | -3.9 | -5.1 |       | acetyl-coenzyme-A hydrolase (by homology)                                |
| CA0346 | orf19.10341 | <i>ROX1</i>        | 1.1  | 1.0  | -1.0 | 1.0  | YPR065W | <i>ROX1</i>   | 1.0 | -1.2 | -1.3 | -1.3 |       | Possible heme-dependent transcriptional repressor (by homology)          |
| CA0349 | orf19.1813  | <i>IPF19026</i>    | 1.2  | 1.3  | 1.5  | 1.3  | YAL053W |               | 1.0 | 1.0  | 1.0  | 1.2  |       | unknown function                                                         |
| CA0350 | orf19.7784  | <i>SNU114</i>      | -1.0 | -1.0 | -1.0 | -1.0 | YKL173W | <i>SNU114</i> | 1.0 | -1.7 | -1.3 | -1.1 |       | snRNP-specific protein (by homology)                                     |
| CA0351 | orf19.145   | <i>RPB4.3F</i>     | -1.1 | -1.0 | -1.1 | -1.0 | YJL140W | <i>RPB4</i>   | 1.0 | 1.2  | 1.1  | -1.0 |       | DNA-directed RNA polymerase II, 32 kDa subunit, 3-prime end (by homo     |
| CA0353 | orf19.147   | <i>YAK1.3F</i>     | 1.0  | -1.0 | 1.0  | 1.0  | YJL141C | <i>YAK1</i>   | 1.0 | 1.2  | 1.6  | -1.2 |       | serine/threonine protein kinase, 3-prime end (by homology)               |
| CA0356 | orf19.13952 | <i>IPF2532</i>     | -1.0 | 1.1  | 1.0  | -1.0 | YLR104W |               | 1.0 | -1.8 | -1.4 | -1.3 |       | unknown function                                                         |
| CA0357 | orf19.333   | <i>FCY22</i>       | 1.0  | 1.1  | 1.3  | 1.1  | YER060W | <i>FCY21</i>  | 1.0 | -1.4 | 1.0  | -1.3 |       | purine-cytosine permease (by homology)                                   |
| CA0362 | orf19.9009  | <i>TEF1</i>        | 1.6  | 1.5  | 1.1  | 1.2  | YPR080W | <i>TEF1</i>   | 1.0 | 1.7  | 2.9  | 3.7  |       | translation elongation factor eEF1 alpha-A chain                         |
| CA0364 | orf19.1525  | <i>IPF15983</i>    | -1.1 | -1.1 | -1.1 | -1.0 | YLR363C | <i>NMD4</i>   | 1.0 | -1.2 | -1.5 | -1.3 |       | unknown function                                                         |
| CA0367 | orf19.1352  | <i>TIM22</i>       | -1.1 | 1.5  | 1.7  | 1.4  | YDL217C | <i>TIM22</i>  | 1.0 | 1.1  | 1.1  | 1.2  |       | Mitochondrial import inner membrane translocase subunit (by homology)    |
| CA0370 |             | <i>IPF13678</i>    | 1.1  | 1.2  | 1.6  | 1.3  | YDR276C | <i>PMP3</i>   | 1.0 | -1.1 | -1.1 | -1.1 |       | unknown function                                                         |
| CA0372 | orf19.1086  | <i>IPF10062</i>    | 1.1  | 1.0  | -1.0 | 1.0  | YNR051C | <i>BRE5</i>   | 1.0 | -1.1 | 1.1  | 1.8  |       | unknown function                                                         |

|        |             |                    |      |      |      |      |         |               |     |      |      |      |                                                                                  |
|--------|-------------|--------------------|------|------|------|------|---------|---------------|-----|------|------|------|----------------------------------------------------------------------------------|
| CA0375 | orf19.2706  | <i>CRH11</i>       | 1.1  | 1.2  | 1.5  | 1.2  | YGR189C | <i>CRH1</i>   | 1.0 | -1.0 | -1.1 | 1.0  | Probable membrane protein (by homology)                                          |
| CA0376 |             | <i>QCR9</i>        | 1.1  | -1.0 | 1.1  | 1.2  | YGR183C | <i>QCR9</i>   | 1.0 | 1.1  | 1.2  | -1.6 | ubiquinol--cytochrome-c reductase subunit 9(by homology)                         |
| CA0377 | orf19.2708  | <i>IPF14356</i>    | 1.0  | 1.0  | 1.0  | -1.0 | YLR022C |               | 1.0 | -1.4 | -1.1 | 1.1  | unknown function                                                                 |
| CA0378 | orf19.3170  | <i>IPF3178</i>     | -1.1 | -1.2 | -1.3 | -1.1 | YFL023W | <i>FYV11</i>  | 1.0 | -1.6 | -1.2 | 1.0  | Unknown function                                                                 |
| CA0379 | orf19.3173  | <i>SSP120</i>      | 1.0  | 1.0  | -1.0 | 1.0  | YLR250W | <i>SSP120</i> | 1.0 | 1.4  | 2.0  | 2.2  | secretory protein (by homology)                                                  |
| CA0381 | orf19.2825  | <i>IPF16047</i>    | 1.0  | 1.0  | 1.1  | 1.0  | YKR071C | <i>DRE2</i>   | 1.0 | -1.1 | 1.1  | 1.1  | unknown function                                                                 |
| CA0382 | orf19.1842  | <i>IPF16030</i>    | -1.2 | -1.1 | -1.1 | -1.1 | YCR038C | <i>BUD5</i>   | 1.0 | -1.9 | -1.7 | -1.4 | similar to <i>Saccharomyces cerevisiae</i> Bud5p GDP/GTP exchange factor f       |
| CA0384 | orf19.10172 | <i>PCL1</i>        | 1.0  | -1.1 | -1.1 | -1.1 | YNL289W | <i>PCL1</i>   | 1.0 | -1.0 | 1.1  | 1.0  | cyclin, G1/S-specific (by homology)                                              |
| CA0386 | orf19.1862  | <i>IPF4065</i>     | 1.0  | 1.2  | 1.3  | 1.2  | YHR087W |               | 1.0 | 1.8  | 1.4  | -1.7 | unknown function                                                                 |
| CA0388 | orf19.1907  | <i>IPF14468</i>    | -1.0 | 1.0  | 1.2  | -1.0 | YGR089W |               | 1.0 | 1.2  | -1.2 | -1.2 | unknown function                                                                 |
| CA0390 | orf19.244   | <i>DCG1</i>        | -1.0 | -1.0 | -1.1 | 1.0  | YIR030C | <i>DCG1</i>   | 1.0 | -1.1 | 1.1  | 1.5  | involved in nitrogen-catabolite metabolism (by homology)                         |
| CA0391 | orf19.7875  | <i>DDC1</i>        | 1.0  | 1.0  | 1.0  | 1.1  | YPL194W | <i>DDC1</i>   | 1.0 | 1.0  | 1.1  | 1.0  | DNA damage checkpoint protein, delays the cell cycle at the G1/S bound           |
| CA0397 | orf19.1930  | <i>FRE31</i>       | 1.0  | -1.0 | -1.0 | 1.0  | YNR060W | <i>FRE4</i>   | 1.0 | 1.3  | 1.0  | 1.0  | Ferric reductase (by homology)                                                   |
| CA0398 | orf19.1986  | <i>ARO2</i>        | -1.1 | -1.2 | -1.1 | -1.2 | YGL148W | <i>ARO2</i>   | 1.0 | 1.6  | 1.8  | 2.8  | chorismate synthase (by homology)                                                |
| CA0399 | orf19.1988  | <i>GDC45</i>       | -1.1 | -1.0 | 1.0  | -1.0 | YLR103C | <i>GDC45</i>  | 1.0 | -1.1 | -1.2 | -1.2 | Chromosomal DNA replication initiation protein (by homology)                     |
| CA0402 | orf19.1990  | <i>IPF15225</i>    | 1.0  | 1.1  | 1.1  | 1.0  | YJL036W | <i>SNX4</i>   | 1.0 | -1.5 | -1.2 | -1.2 | Sorting nexin-like protein (by homology)                                         |
| CA0403 | orf19.1989  | <i>IPF15224</i>    | -1.0 | 1.2  | 1.4  | 1.2  | YKL046C |               | 1.0 | -1.0 | 1.0  | 1.2  | unknown function                                                                 |
| CA0404 | orf19.5548  | <i>LYS14</i>       | -1.0 | -1.0 | -1.0 | -1.0 | YDR034C | <i>LYS14</i>  | 1.0 | -1.1 | -1.0 | 1.0  | transcription factor involved in lysine biosynthesis (by homology)               |
| CA0408 | orf19.5544  | <i>SAC6.5F</i>     | -1.4 | -1.1 | -1.2 | -1.1 | YDR129C | <i>SAC6</i>   | 1.0 | 1.0  | 1.5  | 1.0  | actin filament bundling protein, fimbrin, 5-prime end (by homology)              |
| CA0409 | orf19.5755  | <i>PHO80</i>       | -1.0 | -1.0 | -1.1 | -1.0 | YOL001W | <i>PHO80</i>  | 1.0 | 1.1  | 1.4  | 1.2  | Cyclin (by homology)                                                             |
| CA0410 | orf19.13180 | <i>IPF15065</i>    | 1.2  | 1.1  | 1.1  | 1.1  | YMR178W |               | 1.0 | -1.3 | -1.3 | -1.5 | unknown function                                                                 |
| CA0411 | orf19.1507  | <i>IPF17676</i>    | 1.0  | 1.1  | 1.1  | -1.0 | YBR158W | <i>CST13</i>  | 1.0 | -1.1 | -1.0 | 1.1  | similar to <i>Saccharomyces cerevisiae</i> Cst13p involved in chromosome sta     |
| CA0415 | orf19.1224  | <i>FRP3</i>        | 1.4  | -1.5 | -1.6 | -1.7 | YCR010C | <i>ADY2</i>   | 1.0 | -1.1 | -1.6 | -1.7 | member of the FRP family of proteins related to <i>Yarrowia lipolytica</i> glyox |
| CA0417 | orf19.2225  | <i>UBC13</i>       | 1.2  | 1.1  | 1.1  | 1.1  | YDR092W | <i>UBC13</i>  | 1.0 | -1.4 | -1.3 | -1.2 | E2 ubiquitin-conjugating enzyme (by homology)                                    |
| CA0419 | orf19.2228  | <i>IPF19864</i>    | -1.0 | -1.1 | -1.1 | 1.1  | YGR080W | <i>TWF1</i>   | 1.0 | -1.0 | -1.1 | 1.1  | unknown function                                                                 |
| CA0420 | orf19.2229  | <i>IPF9048</i>     | 1.0  | 1.0  | 1.2  | -1.1 | YPR093C |               | 1.0 | 1.1  | 1.1  | 1.0  | unknown function                                                                 |
| CA0421 | orf19.2230  | <i>IPF9047</i>     | -1.0 | 1.1  | -1.0 | 1.0  | YPR094W |               | 1.0 | -1.0 | -1.0 | -1.0 | unknown function                                                                 |
| CA0425 | orf19.9252  | <i>PPH21</i>       | 1.2  | 1.3  | 1.7  | 1.6  | YDL188C | <i>PPH22</i>  | 1.0 | 1.3  | 1.2  | 1.3  | protein ser/thr phosphatase PP2A-1 (by homology)                                 |
| CA0426 | orf19.2760  | <i>CFT1</i>        | -1.1 | -1.0 | -1.0 | 1.0  | YDR301W | <i>CFT1</i>   | 1.0 | -1.1 | 1.1  | 1.5  | pre-mRNA 3'-end processing factor CF II (by homology)                            |
| CA0427 | orf19.2761  | <i>IPF11995</i>    | -1.0 | -1.0 | 1.2  | -1.0 | YDR302W | <i>GPI11</i>  | 1.0 | -1.4 | -1.0 | -1.1 | unknown function                                                                 |
| CA0428 | orf19.1613  | <i>ILV2</i>        | -1.5 | -2.0 | -2.5 | -2.0 | YMR108W | <i>ILV2</i>   | 1.0 | 1.4  | 2.5  | 3.1  | acetolactate synthase (by homology)                                              |
| CA0430 | orf19.1339  | <i>PRC1</i>        | -1.0 | -1.0 | -1.0 | -1.0 | YMR297W | <i>PRC1</i>   | 1.0 | 1.2  | 1.3  | -1.1 | Carboxypeptidase Y precursor                                                     |
| CA0431 | orf19.1340  | <i>IPF7927</i>     | -1.0 | -1.0 | -1.0 | 1.8  | YDL124W |               | 1.0 | 1.5  | 1.6  | 1.4  | putative aldose reductase (by homology)                                          |
| CA0433 | orf19.1342  | <i>SHM1</i>        | -1.3 | -1.4 | -1.6 | -1.4 | YBR263W | <i>SHM1</i>   | 1.0 | -1.1 | 1.3  | 1.5  | Serine hydroxymethyltransferase precursor, mitochondrial (by homology)           |
| CA0435 | orf19.9305  | <i>UGP1</i>        | -1.3 | 1.1  | 1.3  | 1.1  | YKL035W | <i>UGP1</i>   | 1.0 | 2.1  | 2.3  | 1.8  | UTP--glucose-1-phosphate uridylyltransferase (by homology)                       |
| CA0436 |             | <i>RBL2</i>        | 1.0  | 1.1  | 1.1  | 1.1  | YOR265W | <i>RBL2</i>   | 1.0 | 1.0  | 1.1  | -1.0 | Beta-tubulin binding protein (by homology)                                       |
| CA0437 | orf19.9308  | <i>DIT1</i>        | 1.1  | 1.0  | 1.1  | 1.0  | YDR403W | <i>DIT1</i>   | 1.0 | -1.1 | -1.0 | -1.3 | Spore wall maturation protein (by homology)                                      |
| CA0438 | orf19.8419  | <i>STE4.5EOC</i>   | -1.0 | 1.1  | 1.0  | 1.1  | YOR212W | <i>STE4</i>   | 1.0 | -1.2 | 1.0  | 1.1  | GTP-binding protein beta subunit of the pheromone pathway, 5-prime en            |
| CA0439 | orf19.13015 | <i>IPF12478</i>    | -1.1 | -1.0 | -1.1 | -1.0 | YML034W | <i>SRC1</i>   | 1.0 | -1.4 | -1.4 | -1.7 | unknown function                                                                 |
| CA0443 | orf19.7727  | <i>SPB1</i>        | 1.1  | -1.2 | -1.2 | -1.1 | YCL054W | <i>SPB1</i>   | 1.0 | -1.4 | -1.2 | 1.1  | Putative methyltransferase by homology                                           |
| CA0444 | orf19.75    | <i>IPF17429.3F</i> | -1.1 | -1.1 | -1.2 | 1.0  | YDR166C | <i>SEC5</i>   | 1.0 | 1.9  | 1.6  | 2.1  | similar to <i>Saccharomyces cerevisiae</i> Sec5p required for exocytosis, 3-pri  |
| CA0447 | orf19.2297  | <i>IPF14275</i>    | -1.1 | 1.0  | 1.0  | 1.1  | YPL051W | <i>ARL3</i>   | 1.0 | -1.2 | -1.1 | -1.1 | Probable ADP-ribosylation factors (by homology)                                  |
| CA0449 | orf19.2379  | <i>MOT2.3</i>      | 1.1  | -1.0 | -1.0 | -1.1 | YER068W | <i>MOT2</i>   | 1.0 | 1.1  | 1.2  | 1.2  | transcriptional repressor, 3-prime end (by homology)                             |
| CA0450 | orf19.2378  | <i>IPF9353</i>     | -1.0 | -1.1 | -1.0 | -1.0 | YMR123W | <i>PKR1</i>   | 1.0 | -1.3 | -1.1 | 1.4  | unknown function                                                                 |
| CA0453 | orf19.8880  | <i>IPF13552</i>    | -1.1 | -1.1 | -1.1 | -1.1 | YDR316W |               | 1.0 | -1.5 | -1.5 | -1.5 | putative methyltransferase (by homology)                                         |
| CA0454 | orf19.8879  | <i>RPN6</i>        | -1.0 | -1.1 | -1.1 | 1.1  | YDL097C | <i>RPN6</i>   | 1.0 | 1.3  | 1.7  | 2.5  | subunit of the regulatory particle of the proteasome (by homology)               |
| CA0457 | orf19.2432  | <i>IPF15604</i>    | -1.2 | 1.1  | 1.0  | 1.1  | YFL031W | <i>HAC1</i>   | 1.0 | 1.3  | 3.0  | 2.3  | transcription factor (by homology)                                               |
| CA0460 | orf19.2518  | <i>SEC17</i>       | -1.0 | -1.0 | 1.0  | -1.1 | YBL050W | <i>SEC17</i>  | 1.0 | 1.2  | 1.3  | 1.2  | transport vesicle fusion protein (by homology)                                   |
| CA0461 | orf19.2519  | <i>IPF4972</i>     | 1.0  | -1.0 | 1.1  | -1.0 | YJR112W | <i>NNF1</i>   | 1.0 | -2.4 | -1.9 | -1.8 | unknown function                                                                 |
| CA0462 | orf19.2520  | <i>MRPS28</i>      | 1.0  | -1.1 | -1.1 | -1.1 | YDR337W | <i>MRPS28</i> | 1.0 | -1.0 | -1.1 | 1.1  | ribosomal protein (by homology)                                                  |
| CA0464 | orf19.7798  | <i>IPF14116</i>    | 1.1  | -1.5 | -1.3 | -1.2 | YOR084W |               | 1.0 | -1.4 | -1.0 | -1.3 | unknown function                                                                 |
| CA0465 | orf19.7800  | <i>IPF14113</i>    | -1.3 | -1.0 | -1.1 | -1.0 | YIL130W |               | 1.0 | -1.1 | 1.1  | 1.1  | unknown function                                                                 |
| CA0466 | orf19.1977  | <i>URA4</i>        | 1.1  | 1.1  | 1.1  | 1.1  | YLR420W | <i>URA4</i>   | 1.0 | -1.2 | -1.1 | -1.1 | dihydroorotase (by homology)                                                     |
| CA0468 | orf19.9531  | <i>DIB1</i>        | 1.0  | 1.0  | 1.1  | 1.1  | YPR082C | <i>DIB1</i>   | 1.0 | -1.2 | -1.1 | -1.2 | Component of the U4/U6.U5 snRNP (by homology)                                    |
| CA0469 | orf19.2621  | <i>IPF18977</i>    | 1.0  | -1.0 | -1.0 | 1.0  | YER029C | <i>SMB1</i>   | 1.0 | 1.6  | 2.2  | 1.7  | similar to <i>Saccharomyces cerevisiae</i> Smb1p associated with U1 snRNP :      |
| CA0470 | orf19.2622  | <i>YPT32</i>       | -1.1 | -1.4 | -1.6 | -1.3 | YER031C | <i>YPT31</i>  | 1.0 | -1.1 | 1.1  | 1.2  | small GTP-binding protein essential for Golgi function (by homology)             |
| CA0472 | orf19.13176 | <i>STL1</i>        | 1.3  | -3.9 | -3.9 | -4.3 | YDR536W | <i>STL1</i>   | 1.0 | -1.4 | -2.3 | -3.0 | sugar transporter (by homology)                                                  |
| CA0475 | orf19.8085  | <i>IPF2580</i>     | -1.0 | -1.1 | -1.2 | -1.0 | YOR140W | <i>SFL1</i>   | 1.0 | -1.4 | -1.4 | -1.4 | unknown function                                                                 |
| CA0476 | orf19.8088  | <i>UBP2</i>        | -1.1 | 1.1  | -1.0 | -1.0 | YOR124C | <i>UBP2</i>   | 1.0 | -1.4 | -1.4 | -1.5 | Ubiquitin-specific proteinase (by homology)                                      |
| CA0478 | orf19.13437 | <i>YAE8</i>        | -1.0 | 1.0  | -1.1 | 1.0  | YAL048C |               | 1.0 | 1.1  | -1.0 | 1.1  | GTP-binding protein (by homology)                                                |
| CA0479 | orf19.2630  | <i>IPF16191</i>    | -1.0 | -1.0 | -1.0 | -1.0 | YDL059C | <i>RAD59</i>  | 1.0 | -1.3 | -1.3 | -1.2 | similar to <i>Saccharomyces cerevisiae</i> Rad59p recombination and DNA rep      |



|        |             |            |      |      |      |      |         |        |     |      |      |      |                                                                           |
|--------|-------------|------------|------|------|------|------|---------|--------|-----|------|------|------|---------------------------------------------------------------------------|
| CA0481 | orf19.7766  | STE14      | -1.0 | 1.0  | -1.0 | -1.1 | YDR410C | STE14  | 1.0 | -1.4 | 1.0  | 1.0  | farnesyl cystein carboxyl-methyltransferase (by homology)                 |
| CA0483 | orf19.7764  | SEC9       | 1.0  | 1.1  | 1.1  | 1.0  | YGR009C | SEC9   | 1.0 | -1.1 | 1.0  | -1.1 | transport protein (by homology)                                           |
| CA0485 | orf19.11038 | IPF17574   | -1.1 | -1.1 | -1.2 | -1.1 | YAR014C | BUD14  | 1.0 | -1.1 | 1.2  | 1.1  | Unknown function                                                          |
| CA0488 | orf19.261   | SEC59      | -1.1 | -1.1 | 1.0  | -1.1 | YMR013C | SEC59  | 1.0 | -1.1 | -1.1 | -1.3 | Dolichol kinase (by homology)                                             |
| CA0492 | orf19.9068  | SNU71      | 1.0  | -1.1 | -1.1 | -1.0 | YGR013W | SNU71  | 1.0 | -1.4 | -1.1 | 1.0  | Associated with U1 snRNP (by homology)                                    |
| CA0493 | orf19.1492  | PRP39.3    | 1.0  | -1.0 | 1.1  | -1.0 | YML046W | PRP39  | 1.0 | -1.6 | -1.5 | -1.3 | pre-mRNA splicing factor, 3-prime end (by homology)                       |
| CA0494 | orf19.9070  | RAD7       | 1.0  | 1.2  | 1.2  | -1.0 | YJR052W | RAD7   | 1.0 | -1.4 | 1.1  | -1.0 | nucleotide excision repair protein (by homology)                          |
| CA0495 | orf19.2659  | IPF20056   | -1.0 | 12.8 | 8.1  | 13.5 | YER067W |        | 1.0 | 1.8  | 2.8  | -1.4 | unknown function                                                          |
| CA0496 | orf19.2660  | IPF11644   | -1.0 | -1.0 | 1.0  | -1.0 | YPR023C | EAFF3  | 1.0 | 1.1  | 1.2  | 1.1  | unknown function                                                          |
| CA0500 | orf19.4793  | IPF20058   | -1.1 | -1.1 | -1.0 | -1.0 | YOR252W |        | 1.0 | -1.3 | -1.2 | -1.2 | unknown function                                                          |
| CA0502 | orf19.2664  | IPF16761   | 1.0  | 1.0  | 1.0  | -1.0 | YNL085W | MKT1   | 1.0 | 1.1  | 1.6  | 1.7  | unknown function                                                          |
| CA0504 | orf19.2778  | IPF16466   | -1.2 | -1.1 | -1.5 | -1.3 | YKL014C |        | 1.0 | -1.4 | -1.3 | -1.2 | unknown function                                                          |
| CA0506 | orf19.3626  | IPF11988   | 1.0  | 1.0  | -1.1 | -1.0 | YML096W |        | 1.0 | -1.9 | -1.6 | -1.9 | unknown function                                                          |
| CA0508 | orf19.11107 | IPF11991   | -1.1 | -1.1 | -1.4 | -1.1 | YMR287C | MSU1   | 1.0 | -1.3 | -1.2 | -1.5 | similar to Saccharomyces cerevisiae Msu1p 3-5 exonuclease for RNA 3       |
| CA0509 | orf19.10684 | CDC24      | -1.1 | 1.2  | -1.0 | 1.0  | YAL041W | CDC24  | 1.0 | -2.3 | -1.5 | -1.5 | GTP/GDP exchange factor for Cdc42p (by homology)                          |
| CA0510 | orf19.10685 | ETF1       | -1.3 | -1.1 | -1.1 | 1.0  | YOR356W |        | 1.0 | -1.2 | -1.1 | -1.3 | ETF-UBIQUINONE OXIDOREDUCTASE (by homology)                               |
| CA0511 | orf19.4953  | IPF13975   | -1.1 | 1.1  | 1.0  | -1.0 | YCL047C |        | 1.0 | -1.4 | 1.1  | -1.0 | unknown function                                                          |
| CA0512 | orf19.4954  | VMA16      | 1.3  | -1.0 | 1.4  | 1.2  | YHR026W | PPA1   | 1.0 | 1.3  | 1.6  | 1.8  | H+-ATPase 23 KD subunit, vacuolar (by homology)                           |
| CA0513 | orf19.4955  | IPF13972   | -1.0 | 1.0  | -1.0 | -1.0 | YCL048W |        | 1.0 | -1.3 | -1.1 | 1.0  | unknown function                                                          |
| CA0514 | orf19.4645  | BEM1       | 1.0  | 1.1  | 1.1  | 1.0  | YBR200W | BEM1   | 1.0 | -1.4 | -1.1 | -1.2 | bud emergence mediator (by homology)                                      |
| CA0517 | orf19.2803  | HEM13      | 1.1  | -1.0 | 1.0  | 1.1  | YDR044W | HEM13  | 1.0 | -1.1 | 1.0  | -1.2 | by homology S. cerev.: coproporphyrinogen III oxidase                     |
| CA0519 | orf19.11016 | MRPL10.3   | 1.0  | -1.0 | 1.0  | 1.0  | YNL284C | MRPL10 | 1.0 | -1.0 | -1.3 | -1.5 | ribosomal protein, 3-prime end (by homology)                              |
| CA0521 | orf19.3530  | CKA2       | 1.0  | -1.0 | 1.1  | -1.0 | YOR061W | CKA2   | 1.0 | -1.6 | -1.4 | -1.3 | casein kinase II alpha chain (by homology)                                |
| CA0523 | orf19.11012 | IPF4459    | 1.1  | 1.0  | 1.1  | 1.1  | YKR074W |        | 1.0 | -1.5 | -1.1 | -1.2 | unknown function                                                          |
| CA0525 | orf19.8726  | MSB1       | -1.0 | 1.0  | 1.1  | -1.1 | YOR188W | MSB1   | 1.0 | -1.7 | -1.5 | -1.6 | Morphogenesis-related protein (by homology)                               |
| CA0526 | orf19.2655  | BUB3       | 1.0  | 1.3  | 2.0  | 1.5  | YOR026W | BUB3   | 1.0 | 1.2  | 1.3  | 1.1  | cell cycle arrest protein (by homology)                                   |
| CA0528 | orf19.3622  | ANP1       | -1.2 | -1.1 | -1.4 | -1.1 | YEL036C | ANP1   | 1.0 | -1.5 | -1.0 | -1.1 | Golgi mannosyltransferase (by homology)                                   |
| CA0529 | orf19.3623  | SMC2       | -1.0 | 1.0  | -1.0 | -1.0 | YFR031C | SMC2   | 1.0 | 1.5  | 2.1  | 3.0  | chromosome segregation protein (by homology)                              |
| CA0530 | orf19.8685  | F19633.3EO | 1.0  | 1.2  | 1.1  | 1.1  | YCR093W | CDC39  | 1.0 | -2.0 | -3.2 | -2.5 | similar to Saccharomyces cerevisiae Cdc39p nuclear protein involved in    |
| CA0531 | orf19.8686  | UBC1       | 1.2  | 1.0  | 1.4  | 1.2  | YDR177W | UBC1   | 1.0 | -1.2 | 1.1  | 1.1  | ubiquitin-conjugating enzyme by homology                                  |
| CA0532 | orf19.5068  | IRE1       | -1.1 | -1.0 | -1.0 | -1.2 | YHR079C | IRE1   | 1.0 | -1.3 | -1.2 | -1.1 | protein kinase (by homology)                                              |
| CA0533 | orf19.5067  | IPF19872   | 1.0  | -1.0 | 1.0  | -1.0 | YHR081W |        | 1.0 | -1.5 | 1.0  | 1.3  | unknown function                                                          |
| CA0534 | orf19.5066  | IPF15607   | 1.1  | 1.1  | 1.1  | 1.0  | YDR412W |        | 1.0 | -1.1 | 1.1  | 1.3  | unknown function                                                          |
| CA0535 | orf19.5065  | IPF15606   | 1.1  | 1.1  | 1.2  | 1.1  | YDR414C | ERD1   | 1.0 | -2.4 | -1.5 | -1.4 | similar to Saccharomyces cerevisiae Erd1p required for retention of lumir |
| CA0536 | orf19.2815  | PANC.3     | 1.0  | -1.0 | 1.0  | 1.0  | YIL145C | PAN6   | 1.0 | 1.0  | 1.1  | 1.4  | pantothenate synthetase, 3-prime end (by homology)                        |
| CA0537 | orf19.2818  | PRP16      | -1.1 | -1.1 | -1.3 | -1.1 | YKR086W | PRP16  | 1.0 | -3.0 | -2.8 | -3.4 | RNA-dependent ATPase (by homology)                                        |
| CA0539 | orf19.2820  | NUP57      | 1.0  | -1.0 | 1.1  | -1.0 | YGR119C | NUP57  | 1.0 | -1.1 | -1.0 | 1.1  | nuclear pore protein (by homology)                                        |
| CA0541 | orf19.1083  | IPF14574   | 1.1  | 1.1  | 1.2  | 1.1  | YMR132C |        | 1.0 | 1.1  | 1.1  | 1.1  | unknown function                                                          |
| CA0543 | orf19.2867  | IPF3255    | -1.1 | -1.1 | -1.1 | -1.1 | YOR069W | VPS5   | 1.0 | -1.1 | -1.0 | 1.1  | similar to Saccharomyces cerevisiae Vps5p involved in Golgi retention ar  |
| CA0548 | orf19.2454  | PHO87      | -1.1 | -1.0 | 1.1  | 1.0  | YCR037C | PHO87  | 1.0 | 1.1  | 1.0  | 1.1  | Member of the phosphate permease family (by homology)                     |
| CA0551 | orf19.5531  | CDC37      | -1.0 | -1.2 | -1.3 | -1.1 | YDR168W | CDC37  | 1.0 | -1.8 | -1.4 | -1.6 | Cell division control protein (by homology)                               |
| CA0552 | orf19.5533  | IPF4343    | -1.0 | -1.0 | 1.0  | -1.0 | YML097C | VPS9   | 1.0 | -1.2 | -1.3 | -1.4 | similar to Saccharomyces cerevisiae Vps9pvacuolar sorting protein         |
| CA0553 | orf19.5534  | IPF16653   | 1.0  | 1.3  | 1.5  | 1.4  | YKR088C |        | 1.0 | -1.4 | -1.2 | -1.6 | unknown function                                                          |
| CA0554 | orf19.11444 | HAS1       | -1.2 | -1.0 | -1.1 | -1.1 | YMR290C | HAS1   | 1.0 | 1.3  | 1.9  | 2.1  | ATP-DEPENDENT RNA HELICASE (by homology)                                  |
| CA0555 | orf19.3960  | HYS2       | -1.0 | -1.1 | -1.0 | -1.1 | YJR006W | HYS2   | 1.0 | -1.3 | -1.0 | -1.1 | DNA-directed DNA polymerase delta (by homology)                           |
| CA0559 | orf19.86    | GPX1       | 1.0  | 1.5  | 1.6  | 1.3  | YIR037W | HYR1   | 1.0 | -1.1 | -1.2 | -1.5 | glutathione peroxidase (by homology)                                      |
| CA0561 | orf19.2925  | CIN4       | -1.0 | 1.0  | 1.0  | 1.0  | YMR138W | CIN4   | 1.0 | -1.0 | 1.0  | -1.0 | GTP-binding protein                                                       |
| CA0562 | orf19.2926  | PSO2       | -1.1 | -1.1 | -1.2 | -1.2 | YMR137C | PSO2   | 1.0 | -1.1 | -1.1 | -1.0 | Interstrand crosslink repair protein (by homology)                        |
| CA0563 | orf19.2927  | MNN11      | -1.0 | -1.1 | -1.1 | 1.0  | YJL183W | MNN11  | 1.0 | -1.4 | -1.2 | -1.4 | Mannosyltransferase complex component (by homology)                       |
| CA0565 | orf19.6250  | IPF13526   | -1.0 | -1.1 | -1.1 | -1.1 | YPR129W | SCD6   | 1.0 | 1.0  | 1.1  | 1.0  | unknown function                                                          |
| CA0566 | orf19.6252  | IPF13522   | 1.0  | -1.1 | -1.1 | -1.1 | YPR133C | IWS1   | 1.0 | -1.2 | -1.1 | -1.1 | unknown function                                                          |
| CA0567 | orf19.13632 | RPS23      | 1.0  | -1.1 | -1.0 | 1.1  | YPR132W | RPS23B | 1.0 | 2.1  | 2.8  | 3.5  | Ribosomal protein S23 (by homology)                                       |
| CA0568 | orf19.8729  | APS2       | -1.1 | 1.0  | 1.1  | 1.1  | YJR058C | APS2   | 1.0 | -1.4 | -1.1 | -1.1 | AP-2 complex subunit, sigma2 subunit (by homology)                        |
| CA0569 | orf19.8730  | CDC8       | 1.1  | 1.1  | 1.2  | 1.1  | YJR057W | CDC8   | 1.0 | -1.1 | -1.1 | -1.2 | dTMP kinase (by homology)                                                 |
| CA0570 | orf19.8732  | SVL3       | 1.1  | 1.1  | 1.1  | 1.1  | YPL032C | SVL3   | 1.0 | -1.1 | 1.0  | -1.1 | Involved in vacuole function (by homology)                                |
| CA0571 | orf19.9369  | CDC43      | -1.0 | -1.1 | -1.0 | 1.0  | YGL155W | CDC43  | 1.0 | -1.3 | -1.3 | -1.5 | geranylgeranyltransferase I                                               |
| CA0572 | orf19.9370  | IPF14864   | -1.2 | -1.1 | -1.2 | -1.0 | YDL119C |        | 1.0 | -1.3 | -1.2 | 1.4  | unknown function                                                          |
| CA0573 | orf19.9371  | PEX14      | -1.2 | -1.2 | -1.4 | -1.2 | YGL153W | PEX14  | 1.0 | -1.0 | -1.2 | -1.2 | peroxisomal protein (by homology)                                         |
| CA0576 | orf19.6232  | NPR1       | 1.1  | 2.0  | 2.7  | 2.2  | YNL183C | NPR1   | 1.0 | -1.3 | 1.1  | 1.2  | nitrogen permease reactivator protein (by homology)                       |
| CA0578 | orf19.3071  | IPF9605    | -1.1 | 1.1  | 1.0  | 1.1  | YMR036C | MIH1   | 1.0 | 1.1  | 1.1  | 1.3  | similar to Saccharomyces cerevisiae Mih1p M-phase inducing protein tyr    |
| CA0580 | orf19.3559  | F3184.EXON | 1.1  | 1.0  | -1.1 | 1.0  | YGR165W |        | 1.0 | 1.1  | -1.2 | -1.3 | unknown function, exon 2                                                  |

|        |             |                    |      |      |      |      |         |               |     |      |      |      |                                                                                  |
|--------|-------------|--------------------|------|------|------|------|---------|---------------|-----|------|------|------|----------------------------------------------------------------------------------|
| CA0581 | orf19.3558  | <i>IPF3181</i>     | 1.3  | 1.3  | 1.4  | 1.3  | YDL018C | <i>ERP3</i>   | 1.0 | -1.1 | 1.0  | 1.1  | similar to <i>Saccharomyces cerevisiae</i> Erp3p p24 protein involved in mem     |
| CA0582 | orf19.11041 | <i>IPF3180</i>     | 1.1  | -1.0 | -1.0 | -1.0 | YDR437W |               | 1.0 | -1.3 | -1.3 | -1.2 | unknown function                                                                 |
| CA0583 | orf19.12526 | <i>3SH1.EXON2</i>  | -1.2 | -1.1 | -1.2 | -1.1 | YJL101C | <i>GSH1</i>   | 1.0 | -1.2 | -1.3 | -1.2 | gamma-glutamylcysteine synthetase, exon 2 (by homology)                          |
| CA0585 | orf19.12528 | <i>ADE5,7</i>      | 1.0  | -1.0 | -1.0 | -1.1 | YGL234W | <i>ADE5,7</i> | 1.0 | 1.2  | 1.5  | 2.7  | phosphoribosylamine-glycine ligase and phosphoribosylformylglycinamid            |
| CA0587 | orf19.8753  | <i>SPO14.5EOC</i>  | -1.1 | 1.0  | -1.5 | -1.1 | YKR031C | <i>SPO14</i>  | 1.0 | -1.6 | -1.6 | -1.7 | phospholipase D, 5-prime end                                                     |
| CA0590 | orf19.8756  | <i>IPF13079</i>    | -1.1 | -1.0 | -1.0 | -1.0 | YDR336W |               | 1.0 | 1.1  | 1.3  | 1.1  | unknown function                                                                 |
| CA0591 | orf19.1816  | <i>ALS3.5EOC</i>   | 1.1  | 1.0  | 1.0  | -1.0 | YJR004C | <i>SAG1</i>   | 1.0 | -2.6 | -2.3 | -2.3 | agglutinin-like protein, 5-prime end                                             |
| CA0593 | orf19.4904  | <i>ARP6</i>        | 1.0  | -1.0 | 1.2  | 1.0  | YLR085C | <i>ARP6</i>   | 1.0 | 1.0  | 1.0  | -1.1 | actin-related protein (by homology)                                              |
| CA0594 | orf19.12368 | <i>IPF8860</i>     | 1.0  | -1.0 | -1.0 | 1.0  | YMR281W | <i>GPI12</i>  | 1.0 | -1.1 | -1.2 | -1.4 | similar to <i>Saccharomyces cerevisiae</i> Gpi12p N-acetylglucosaminyl phos      |
| CA0596 | orf19.12346 | <i>IPF9706</i>     | -1.0 | -1.3 | -1.5 | -1.3 | YBR203W |               | 1.0 | 1.3  | 1.2  | 1.3  | unknown function                                                                 |
| CA0597 | orf19.12345 | <i>IPF9704</i>     | 1.1  | -1.0 | 1.0  | 1.1  | YKR062W | <i>TFA2</i>   | 1.0 | -1.4 | -1.3 | -1.6 | similar to <i>Saccharomyces cerevisiae</i> Tfa2p TFIIE subunit (transcription ir |
| CA0599 | orf19.10184 | <i>IPF12428</i>    | 1.1  | -1.2 | -1.1 | -1.0 | YHR088W | <i>RPF1</i>   | 1.0 | -1.3 | -1.2 | -1.1 | unknown function                                                                 |
| CA0600 | orf19.2666  | <i>MSN5.5F</i>     | -1.1 | 1.4  | 1.4  | 1.1  | YDR335W | <i>MSN5</i>   | 1.0 | 1.1  | 1.3  | 1.5  | Importin-beta family member required for nuclear export of Pho4p and in          |
| CA0603 | orf19.3076  | <i>IPF1709</i>     | 1.1  | 1.0  | 1.4  | 1.2  | YDR100W |               | 1.0 | 1.2  | 1.1  | -1.0 | unknown function                                                                 |
| CA0604 | orf19.3077  | <i>VID21</i>       | -1.0 | -1.0 | -1.0 | 1.1  | YDR359C | <i>VID21</i>  | 1.0 | -1.8 | -1.6 | -1.2 | unknown function                                                                 |
| CA0605 | orf19.9240  | <i>UTR2</i>        | -1.1 | 1.0  | -1.0 | 1.2  | YEL040W | <i>UTR2</i>   | 1.0 | -1.2 | -1.1 | 2.1  | 1,3-1,4-beta-glucanase (by homology)                                             |
| CA0606 | orf19.9241  | <i>COP1</i>        | -1.2 | -1.2 | -1.3 | -1.2 | YDL145C | <i>COP1</i>   | 1.0 | -1.4 | -1.5 | -1.4 | coatomer complex alpha chain of secretory pathway vesicles (by homolo            |
| CA0615 | orf19.1601  | <i>RPL3</i>        | -1.2 | -1.3 | -1.5 | -1.4 | YOR063W | <i>RPL3</i>   | 1.0 | 1.8  | 2.9  | 3.0  | 60S large subunit ribosomal protein L3.e (by homology)                           |
| CA0616 | orf19.2619  | <i>PHO11</i>       | 1.0  | 2.0  | 2.9  | 1.7  | YBR092C | <i>PHO3</i>   | 1.0 | -1.0 | -1.2 | -1.1 | Secreted acid phosphatase                                                        |
| CA0617 | orf19.2618  | <i>MET2</i>        | -1.0 | -1.3 | -1.3 | -1.2 | YNL277W | <i>MET2</i>   | 1.0 | 1.1  | -1.1 | 1.0  | Homoserine O-acetyltransferase                                                   |
| CA0618 | orf19.2616  | <i>UGT51</i>       | -1.0 | 1.0  | 1.0  | -1.0 | YLR189C | <i>UGT51</i>  | 1.0 | -1.1 | -1.1 | -1.1 | UDP-glucose:sterol glucosyltransferase                                           |
| CA0622 | orf19.3149  | <i>IPF14171</i>    | 1.2  | 1.1  | 1.2  | 1.4  | YGR086C |               | 1.0 | 1.2  | 1.3  | -1.7 | unknown function                                                                 |
| CA0623 | orf19.3153  | <i>MSS4.3</i>      | -1.1 | -1.1 | 1.1  | 1.1  | YDR208W | <i>MSS4</i>   | 1.0 | -1.5 | -1.5 | -1.4 | phosphatidylinositol-4-phosphate 5-kinase, 3-prime end (by homology)             |
| CA0624 | orf19.3154  | <i>IPF312</i>      | -1.1 | -1.1 | -1.1 | -1.0 | YJR080C |               | 1.0 | -1.2 | -1.1 | -1.4 | unknown function                                                                 |
| CA0626 | orf19.3161  | <i>IPF3161</i>     | 1.1  | -1.1 | -1.2 | -1.1 | YNR054C |               | 1.0 | -1.2 | 1.0  | 1.2  | Unknown function                                                                 |
| CA0627 | orf19.3160  | <i>HSP12</i>       | 1.5  | -1.6 | -1.8 | -1.3 | YFL014W | <i>HSP12</i>  | 1.0 | -1.3 | -2.1 | -9.5 | Heat shock protein (by homology)                                                 |
| CA0628 | orf19.773   | <i>IPF3878</i>     | -1.0 | -1.0 | 1.0  | -1.0 | YLR221C | <i>RSA3</i>   | 1.0 | 1.1  | 1.2  | 1.2  | unknown function                                                                 |
| CA0631 | orf19.11813 | <i>IPF11698</i>    | 1.0  | 1.1  | 1.3  | 1.1  | YNL125C | <i>ESBP6</i>  | 1.0 | -1.1 | -1.3 | -1.4 | similar to <i>Saccharomyces cerevisiae</i> Esbp6p probable monocarboxylate       |
| CA0632 | orf19.11812 | <i>RPS5</i>        | 1.2  | -1.2 | -1.2 | -1.1 | YJR123W | <i>RPS5</i>   | 1.0 | -1.6 | -1.4 | -1.1 | ribosomal protein S5.e (by homology)                                             |
| CA0633 | orf19.9340  | <i>IPF16269</i>    | 1.0  | -1.0 | 1.0  | 1.0  | YGR278W |               | 1.0 | 1.2  | 1.1  | 1.0  | unknown function                                                                 |
| CA0634 | orf19.1772  | <i>IPF16267</i>    | 1.0  | -1.1 | -1.1 | -1.0 | YER077C |               | 1.0 | 1.1  | 1.2  | 1.2  | unknown function                                                                 |
| CA0635 | orf19.9342  | <i>IPF9036</i>     | 1.0  | 1.0  | 1.1  | -1.0 | YNL216W | <i>RAP1</i>   | 1.0 | -1.3 | -1.4 | -1.1 | similar to <i>Saccharomyces cerevisiae</i> Rap1p DNA-binding protein with re     |
| CA0642 | orf19.3732  | <i>ERG25</i>       | 1.5  | -1.1 | 1.1  | -1.0 | YGR060W | <i>ERG25</i>  | 1.0 | -1.4 | -1.3 | -1.6 | C-4 sterol methyl oxidase                                                        |
| CA0643 | orf19.3733  | <i>IDP2</i>        | -1.1 | -3.6 | -4.8 | -3.1 | YLR174W | <i>IDP2</i>   | 1.0 | -4.5 | -7.5 | -7.8 | isocitrate dehydrogenase, cytosolic (by homology)                                |
| CA0649 | orf19.3211  | <i>RFC3</i>        | 1.1  | 1.0  | 1.0  | -1.0 | YNL290W | <i>RFC3</i>   | 1.0 | -1.4 | -1.4 | -1.2 | DNA replication factor C, 40 kDa subunit (by homology)                           |
| CA0652 | orf19.10082 | <i>SHP1</i>        | -1.1 | -1.1 | -1.2 | 1.0  | YBL058W | <i>SHP1</i>   | 1.0 | -2.1 | -2.0 | -1.2 | potential regulatory subunit for Glc7p (by homology)                             |
| CA0653 | orf19.10083 | <i>MET6</i>        | 1.1  | -1.3 | -1.3 | -1.1 | YER091C | <i>MET6</i>   | 1.0 | -1.3 | 1.1  | -1.6 | BY HOMOLOGY TO S.CEREV.: 5-methyltetrahydropteroyltrimethylglutamate-h           |
| CA0657 | orf19.5574  | <i>IPF19877</i>    | 1.0  | 1.1  | 1.0  | 1.1  | YGR012W |               | 1.0 | -1.1 | -1.1 | 1.1  | putative cysteine synthase (by homology)                                         |
| CA0658 | orf19.5575  | <i>IPF16505</i>    | 1.1  | -1.1 | -1.1 | -1.1 | YPL112C |               | 1.0 | -1.3 | -1.2 | -1.3 | Unknown function                                                                 |
| CA0660 | orf19.5577  | <i>IPF16189.5F</i> | -1.1 | -1.4 | -2.0 | -1.4 | YDR531W |               | 1.0 | -1.5 | -1.3 | -1.1 | panthotenate kinase, 5-prime end (by homology)                                   |
| CA0661 | orf19.8326  | <i>APG7</i>        | -1.0 | 1.0  | 1.0  | -1.0 | YHR171W | <i>APG7</i>   | 1.0 | -1.1 | -1.2 | -1.3 | component of the autophagic system (by homology)                                 |
| CA0662 | orf19.708   | <i>SPC97</i>       | -1.0 | -1.1 | 1.1  | -1.0 | YHR172W | <i>SPC97</i>  | 1.0 | -1.6 | -1.3 | 1.1  | spindle pole body component (by homology)                                        |
| CA0663 | orf19.709   | <i>PUP2</i>        | 1.2  | 1.3  | 1.3  | 1.1  | YGR253C | <i>PUP2</i>   | 1.0 | -1.7 | -1.1 | 1.3  | 20S proteasome subunit(alpha5) (by homology)                                     |
| CA0664 | orf19.710   | <i>1.SC2.3EOC1</i> | 1.0  | -2.7 | -2.9 | -2.7 | YGR244C | <i>LSC2</i>   | 1.0 | 1.1  | -1.3 | -2.7 | succinate-CoA ligase beta subunit, 3-prime end (by homology)                     |
| CA0665 | orf19.11733 | <i>INT1</i>        | -1.2 | -1.0 | -1.2 | -1.2 | YJR092W | <i>BUD4</i>   | 1.0 | -1.4 | -1.2 | -1.1 | integrin-like protein alpha chain                                                |
| CA0666 | orf19.11734 | <i>FIP1</i>        | 1.0  | 1.0  | -1.0 | -1.0 | YJR093C | <i>FIP1</i>   | 1.0 | -1.7 | -1.6 | -1.5 | Component of pre-mRNA polyadenylation factor PF (by homology)                    |
| CA0667 | orf19.11737 | <i>TIF5</i>        | -1.2 | -1.4 | -1.3 | -1.3 | YPR041W | <i>TIF5</i>   | 1.0 | 1.3  | 1.3  | 1.6  | Translation initiation factor eIF5 (by homology)                                 |
| CA0669 | orf19.448   | <i>IPF5918</i>     | -1.1 | -1.1 | -1.1 | -1.0 | YOR042W |               | 1.0 | -1.4 | -1.3 | -1.9 | unknown function                                                                 |
| CA0670 | orf19.449   | <i>IPF5915</i>     | -1.2 | 1.1  | -1.1 | -1.1 | YKR070W |               | 1.0 | -1.3 | -1.2 | -1.4 | phosphatidyl synthase (by homology)                                              |
| CA0675 | orf19.8771  | <i>IPF13098</i>    | -1.1 | -1.1 | -1.1 | -1.0 | YER152C |               | 1.0 | -1.6 | -1.2 | -1.6 | unknown function                                                                 |
| CA0677 | orf19.8773  | <i>IPF13095</i>    | -1.1 | -1.1 | -1.1 | 1.1  | YGL212W | <i>VAM7</i>   | 1.0 | -1.1 | -1.1 | -1.0 | unknown function                                                                 |
| CA0678 | orf19.8774  | <i>IPF13094</i>    | -1.2 | -1.2 | 1.0  | -1.1 | YNL115C |               | 1.0 | -1.1 | -1.4 | -1.7 | unknown function                                                                 |
| CA0680 | orf19.12169 | <i>IPF14511.5F</i> | -1.0 | 1.0  | -1.0 | 1.0  | YMR313C |               | 1.0 | -1.7 | -1.3 | -1.1 | unknown function, 5-prime end                                                    |
| CA0682 | orf19.12171 | <i>IPF14514</i>    | 1.0  | 1.0  | -1.0 | 1.0  | YMR312W | <i>TOT6</i>   | 1.0 | -1.4 | -1.0 | 1.0  | unknown function                                                                 |
| CA0685 | orf19.13037 | <i>ADO1</i>        | 1.1  | -1.0 | 1.0  | -1.1 | YJR105W | <i>ADO1</i>   | 1.0 | 1.2  | 1.8  | 2.1  | adenosine kinase (by homology)                                                   |
| CA0686 | orf19.3222  | <i>IPF162</i>      | -1.2 | -1.1 | 1.0  | 1.0  | YGR125W |               | 1.0 | -1.1 | 1.1  | 1.2  | sulphate transporter (by homology)                                               |
| CA0687 | orf19.3221  | <i>CPA2</i>        | -1.0 | 1.2  | 1.3  | 1.2  | YJR109C | <i>CPA2</i>   | 1.0 | 1.3  | 1.4  | 3.8  | arginine-specific carbamoylphosphate (by homology)                               |
| CA0692 | orf19.10359 | <i>PGM2</i>        | -1.2 | 1.3  | 1.5  | 1.5  | YMR105C | <i>PGM2</i>   | 1.0 | 3.1  | 3.3  | 1.0  | Phosphoglucosmutase (by homology)                                                |
| CA0693 | orf19.3288  | <i>F12606.5EO</i>  | -1.1 | -1.1 | -1.2 | -1.1 | YNL123W |               | 1.0 | -1.2 | -1.0 | 1.0  | unknown function, 5-prime end                                                    |
| CA0696 | orf19.3291  | <i>HMT1</i>        | 1.0  | 1.1  | 1.1  | 1.0  | YBR034C | <i>HMT1</i>   | 1.0 | -1.0 | -1.3 | 1.0  | hnRNP methyltransferase (by homology)                                            |
| CA0697 | orf19.3363  | <i>VTC4</i>        | -1.0 | 1.4  | 1.9  | 1.5  | YJL012C | <i>VTC4</i>   | 1.0 | -1.2 | 1.1  | 1.7  | putative polyphosphate synthetase (by homology)                                  |



|        |             |             |      |      |      |      |         |        |     |      |      |      |                                                                            |
|--------|-------------|-------------|------|------|------|------|---------|--------|-----|------|------|------|----------------------------------------------------------------------------|
| CA0700 | orf19.3366  | SHR3        | 1.2  | 1.0  | 1.1  | 1.2  | YDL212W | SHR3   | 1.0 | 1.5  | 1.5  | 1.6  | endoplasmatic reticulum membrane protein (by homology)                     |
| CA0702 | orf19.10430 | IPF11812    | -1.1 | -1.2 | -1.3 | -1.1 | YER008C | SEC3   | 1.0 | -1.3 | -1.1 | -1.1 | unknown function                                                           |
| CA0704 | orf19.2915  | IPF11806    | -1.1 | -1.0 | 1.1  | -1.0 | YER005W | YND1   | 1.0 | 1.0  | 1.6  | 1.1  | similar to Saccharomyces cerevisiae Ynd1p nucleoside diphosphatase (t      |
| CA0711 | orf19.9712  | VMA5        | -1.4 | 1.1  | -1.1 | 1.1  | YKL080W | VMA5   | 1.0 | -1.9 | -2.0 | -1.7 | H+-ATPase V1 domain 42 KD subunit (by homology)                            |
| CA0712 | orf19.2167  | IPF13717    | 1.0  | -1.1 | -1.2 | -1.1 | YKL082C |        | 1.0 | -1.9 | -1.4 | -1.1 | unknown function                                                           |
| CA0713 | orf19.2168  | IFJ2        | 1.1  | -1.1 | -1.1 | -1.0 | YGR263C |        | 1.0 | -1.5 | -1.3 | -1.1 | Unknown function                                                           |
| CA0715 | orf19.3393  | DBP9        | -1.1 | -1.2 | -1.2 | -1.1 | YLR276C | DBP9   | 1.0 | -1.5 | -1.4 | -1.3 | dead box helicase                                                          |
| CA0716 | orf19.3392  | DOG2        | -1.0 | 1.2  | 1.1  | 1.1  | YHR044C | DOG1   | 1.0 | 1.2  | 1.4  | 1.0  | 2-deoxyglucose-6-phosphate phosphatase (by homology)                       |
| CA0718 | orf19.3455  | IPF9782     | -1.0 | -1.1 | 1.0  | 1.0  | YPL060W | LPE10  | 1.0 | -1.1 | 1.1  | 1.0  | unknown function                                                           |
| CA0720 | orf19.3457  | IPF17932    | 1.1  | -1.2 | -1.0 | 1.0  | YBR175W | SWD3   | 1.0 | -1.3 | -1.2 | 1.1  | unknown function                                                           |
| CA0721 | orf19.10405 | IPF10429    | 1.1  | 1.0  | 1.2  | 1.1  | YMR295C |        | 1.0 | -1.2 | 1.0  | 1.3  | unknown function                                                           |
| CA0722 | orf19.10404 | ERK1        | -1.0 | 1.2  | 1.5  | 1.4  | YGR040W | KSS1   | 1.0 | -1.0 | -1.0 | 1.0  | mitogen-activated protein kinase (FUS3 homolog)                            |
| CA0723 | orf19.2885  | PR12        | -1.1 | -1.1 | -1.0 | 1.0  | YKL045W | PR12   | 1.0 | -2.2 | -1.8 | -1.8 | DNA-directed DNA polymerase alpha , 58 KD subunit (DNA primase) (by        |
| CA0727 | orf19.11214 | IPF7347     | 1.1  | 1.1  | 1.0  | -1.0 | YIL027C | KRE27  | 1.0 | -1.1 | 1.1  | 1.0  | unknown function                                                           |
| CA0728 | orf19.11212 | IPF7345     | -1.2 | -1.0 | -1.2 | -1.2 | YAL031C | FUN21  | 1.0 | 1.0  | 1.1  | -1.0 | unknown function                                                           |
| CA0730 | orf19.11208 | IPF7334     | 1.0  | -1.0 | -1.1 | -1.0 | YOR004W |        | 1.0 | -1.7 | -1.4 | -1.1 | unknown function                                                           |
| CA0731 | orf19.11206 | IPF7333     | -1.0 | 1.1  | 1.1  | 1.0  | YNL023C | FAP1   | 1.0 | -1.4 | -1.5 | -1.6 | unknown function                                                           |
| CA0733 | orf19.4635  | NIP1        | -1.1 | -1.1 | -1.2 | -1.1 | YMR309C | NIP1   | 1.0 | 1.2  | 1.7  | 2.1  | translation initiation factor subunit                                      |
| CA0734 | orf19.4634  | IPF8996     | 1.1  | -1.0 | 1.0  | -1.0 | YGL211W |        | 1.0 | -1.4 | -1.2 | -1.2 | unknown function                                                           |
| CA0735 | orf19.4633  | IPF8995     | 1.1  | -1.1 | 1.1  | 1.0  | YMR226C |        | 1.0 | 1.1  | 1.3  | 1.5  | unknown function                                                           |
| CA0736 | orf19.4632  | RPL20B      | 1.3  | -1.1 | 1.2  | 1.3  | YOR312C | RPL20B | 1.0 | 1.8  | 2.1  | 2.2  | ribosomal protein (by homology)                                            |
| CA0739 | orf19.11816 | IPF18885    | 1.0  | -1.0 | 1.1  | 1.0  | YLR459W | CDC91  | 1.0 | -1.3 | -1.2 | -2.1 | similar to Saccharomyces cerevisiae Cdc91p cell division control protein   |
| CA0740 |             | IPF3262.3   | 1.4  | 1.3  | 1.1  | 1.3  | YBR173C | UMP1   | 1.0 | -1.1 | 1.1  | -1.1 | unknown function, 3-prime end                                              |
| CA0741 | orf19.3141  | IPF3261     | -1.1 | -1.2 | -1.4 | -1.4 | YPL105C |        | 1.0 | -1.4 | -1.1 | -1.2 | unknown function                                                           |
| CA0743 |             | RNA14.3EOC  | -1.1 | -1.0 | -1.1 | -1.1 | YMR061W | RNA14  | 1.0 | -2.0 | -1.9 | -2.0 | component of pre-mRNA 3'-end processing factor CF I, 3-prime end (by I     |
| CA0745 | orf19.9104  | MTF1        | -1.1 | -1.1 | -1.0 | 1.1  | YMR228W | MTF1   | 1.0 | -1.1 | -1.3 | -1.3 | RNA polymerase specific factor, mitochondrial (by homology)                |
| CA0747 | orf19.9102  | SNF2        | -1.3 | -1.3 | -1.8 | -1.5 | YOR290C | SNF2   | 1.0 | -1.6 | -1.4 | -1.3 | component of SWI/SNF global transcription activator complex (by homolc     |
| CA0748 | orf19.1974  | TFS1        | 1.1  | -1.2 | -1.3 | -1.2 | YLR178C | TFS1   | 1.0 | 1.1  | -1.2 | -2.2 | cdc25-dependent nutrient- and ammonia-response cell-cycle regulator (b     |
| CA0749 | orf19.1973  | HAP5        | -1.0 | -1.0 | -1.0 | -1.0 | YOR358W | HAP5   | 1.0 | -1.3 | -1.4 | -1.4 | CCAAT-binding factor subunit (by homology)                                 |
| CA0750 | orf19.1972  | IPF6284     | 1.0  | -1.1 | -1.1 | -1.1 | YHR207C |        | 1.0 | 1.1  | 1.2  | 1.0  | unknown function                                                           |
| CA0753 | orf19.11287 | IPF10359    | -1.0 | -1.0 | -1.0 | 1.0  | YMR135C |        | 1.0 | -1.2 | -1.2 | -1.4 | unknown function                                                           |
| CA0758 | orf19.3197  | PAP11       | -1.1 | -1.0 | -1.0 | -1.0 | YKR002W | PAP1   | 1.0 | -1.8 | -2.0 | -1.6 | poly(A) polymerase by homology to S. cerevisiae                            |
| CA0759 | orf19.3198  | IPF11167    | -1.1 | -1.1 | -1.2 | -1.1 | YKR003W | OSH6   | 1.0 | 1.1  | 1.3  | -1.0 | unknown function                                                           |
| CA0760 | orf19.3201  | IPF11161.3  | 1.0  | 1.1  | -1.0 | 1.0  | YCR097W | A1     | 1.0 | -1.0 | -1.2 | -1.2 | unknown function, 3-prime end                                              |
| CA0761 | orf19.9146  | IPF8267     | -1.1 | 1.1  | -1.1 | -1.0 | YOR291W |        | 1.0 | -1.3 | -1.5 | -1.3 | P-type ATPase                                                              |
| CA0762 | orf19.9147  | TAF67       | -1.0 | -1.0 | -1.0 | 1.0  | YMR227C | TAF67  | 1.0 | -1.1 | 1.1  | 1.3  | TFIID subunit (by homology)                                                |
| CA0763 | orf19.2232  | RPL11       | 1.4  | 1.0  | -1.1 | 1.1  | YPR102C | RPL11A | 1.0 | 1.4  | 1.7  | 1.8  | 60S ribosomal protein (by homology)                                        |
| CA0764 | orf19.2233  | PRE2        | -1.0 | -1.0 | -1.1 | 1.0  | YPR103W | PRE2   | 1.0 | 1.1  | 1.0  | 1.1  | 20S proteasome subunit (beta5)                                             |
| CA0765 | orf19.9778  | PF9040.3EOC | 1.1  | -1.1 | -1.1 | -1.1 | YPR104C | FHL1   | 1.0 | -1.7 | -1.4 | -1.3 | similar to Saccharomyces cerevisiae Fhl1p transcriptional activator of the |
| CA0767 | orf19.12434 | KEM1.3      | -1.1 | -1.0 | -1.1 | 1.0  | YGL173C | KEM1   | 1.0 | -1.2 | -1.3 | -1.3 | multifunctional nuclease, 3-prime end (by homology)                        |
| CA0770 | orf19.10345 | IPF10963    | -1.2 | -1.0 | -1.2 | 1.0  | YIL144W | TID3   | 1.0 | 1.2  | 1.1  | 1.4  | similar to Saccharomyces cerevisiae Tid3p intercatcing Dcm1p (by homolc    |
| CA0773 | orf19.854   | GA11.EXON   | -1.0 | -1.3 | -1.3 | -1.2 | YGR019W | UGA1   | 1.0 | -1.8 | -1.3 | -1.4 | 4-aminobutyrate aminotransferase, exon 1 (by homology)                     |
| CA0778 | orf19.4779  | IPF12884    | 1.0  | 1.3  | 1.3  | 1.0  | YKR105C |        | 1.0 | 1.0  | 1.1  | 1.3  | unknown function                                                           |
| CA0779 | orf19.3491  | IPF20065    | -1.0 | 1.0  | -1.0 | -1.0 | YMR284W | YKU70  | 1.0 | -1.2 | -1.4 | -1.6 | similar to Saccharomyces cerevisiae Yku70p high-affinity DNA-binding pi    |
| CA0783 | orf19.3931  | ACR1        | 1.1  | -3.3 | -3.5 | -2.3 | YJR095W | SFC1   | 1.0 | -4.3 | -4.6 | -4.9 | Succinate-fumarate transporter (by homology)                               |
| CA0785 | orf19.11411 | IPF14603    | 1.1  | 1.2  | 1.3  | 1.3  | YJR100C |        | 1.0 | -1.1 | 1.8  | 1.9  | unknown function                                                           |
| CA0786 | orf19.2446  | IPF7473     | -1.2 | -1.4 | -1.4 | -1.2 | YDL144C |        | 1.0 | -1.2 | -1.2 | 1.0  | unknown function                                                           |
| CA0787 | orf19.2447  | IPF7472     | -1.2 | -1.4 | -1.2 | -1.1 | YJL100W | LSB6   | 1.0 | 1.0  | 1.1  | 1.0  | unknown function                                                           |
| CA0789 | orf19.3356  | ESP1        | -1.0 | 1.0  | 1.1  | 1.0  | YGR098C | ESP1   | 1.0 | -2.0 | -2.7 | -2.6 | Required for sister chromatid separation (by homology)                     |
| CA0790 | orf19.3357  | IPF14193    | 1.2  | 1.0  | 1.1  | 1.0  | YHR059W | FYV4   | 1.0 | -2.2 | -2.0 | -2.0 | unknown function                                                           |
| CA0791 | orf19.3358  | LSC1        | 1.1  | -1.9 | -1.8 | -1.7 | YOR142W | LSC1   | 1.0 | -1.4 | -1.4 | -1.6 | succinate-CoA ligase / synthetase (by homology)                            |
| CA0792 | orf19.554   | DIT2        | 1.1  | 1.1  | 1.1  | 1.1  | YDR402C | DIT2   | 1.0 | -1.2 | -1.1 | -1.2 | putative cytochrome P450                                                   |
| CA0793 | orf19.553   | IPF16273    | 1.0  | -1.0 | -1.0 | -1.0 | YBR180W | DTR1   | 1.0 | -1.3 | -1.4 | -1.1 | similar to Saccharomyces cerevisiae Dtr1p dityrosine transporter (by hon   |
| CA0794 | orf19.552   | IPF15639    | 1.0  | -1.0 | 1.0  | 1.1  | YCL038C |        | 1.0 | 1.2  | -1.1 | -1.1 | unknown function                                                           |
| CA0796 | orf19.9175  | ALR1        | 1.0  | -1.0 | 1.0  | 1.1  | YOL130W | ALR1   | 1.0 | 1.1  | 1.5  | 2.5  | divalent cation transporter (by homology)                                  |
| CA0798 | orf19.9177  | IPF13565    | -1.0 | 1.0  | -1.0 | 1.1  | YNL308C | KRI1   | 1.0 | 1.4  | 1.9  | 2.0  | unknown function                                                           |
| CA0800 | orf19.3494  | IPF14064    | -1.1 | -1.1 | 1.1  | -1.0 | YDR318W | MCM21  | 1.0 | -1.1 | 1.1  | 1.1  | similar to Saccharomyces cerevisiae Mcm21p involved in minichromosor       |
| CA0801 | orf19.3496  | CHC1        | 1.4  | 1.1  | 1.1  | -1.0 | YGL206C | CHC1   | 1.0 | 1.1  | 1.1  | 1.2  | clathrin heavy chain (by homology)                                         |
| CA0804 | orf19.3515  | BNA1        | 1.0  | 1.1  | 1.1  | 1.1  | YJR025C | BNA1   | 1.0 | -1.1 | -1.0 | -1.3 | 3-hydroxyanthranilic acid dioxygenase (by homology)                        |
| CA0806 | orf19.3517  | IPF12567    | 1.0  | 1.0  | 1.0  | 1.0  | YOR223W |        | 1.0 | -1.1 | 1.4  | 1.2  | unknown function                                                           |
| CA0807 | orf19.3518  | IPF12564    | -1.3 | -3.5 | -3.4 | -3.0 | YPL134C | ODC1   | 1.0 | -1.6 | -1.6 | -2.7 | ADP/ATP carrier proteins (by homology)                                     |

|        |             |                    |      |      |      |      |         |               |     |      |      |      |                                                                            |
|--------|-------------|--------------------|------|------|------|------|---------|---------------|-----|------|------|------|----------------------------------------------------------------------------|
| CA0810 | orf19.1923  | <i>RRN3</i>        | 1.2  | -1.1 | -1.2 | -1.2 | YKL125W | <i>RRN3</i>   | 1.0 | -1.2 | -1.1 | -1.1 | RNA polymerase I specific transcription factor (by homology)               |
| CA0813 | orf19.1915  | <i>MPP10</i>       | 1.0  | -1.3 | -1.3 | -1.1 | YJR002W | <i>MPP10</i>  | 1.0 | -1.3 | 1.1  | 1.0  | component of the U3 small nucleolar ribonucleoprotein (by homology)        |
| CA0819 | orf19.1949  | <i>VPS1</i>        | -1.2 | -1.1 | -1.2 | -1.1 | YKR001C | <i>VPS1</i>   | 1.0 | -2.0 | -1.7 | -1.9 | member of the dynamin family of GTPases (by homology)                      |
| CA0820 | orf19.1950  | <i>IPF12138</i>    | -1.0 | -1.2 | -1.0 | 1.0  | YBR022W |               | 1.0 | -1.2 | -1.5 | -1.4 | unknown function                                                           |
| CA0821 | orf19.2989  | <i>IPF16795</i>    | -1.0 | 1.0  | 1.1  | 1.0  | YNL274C |               | 1.0 | -1.1 | -1.4 | -1.7 | glycerate/formate-dehydrogenase (by homology)                              |
| CA0822 | orf19.2990  | <i>EXG1</i>        | -1.0 | 1.1  | 1.2  | 1.1  | YLR300W | <i>EXG1</i>   | 1.0 | 1.4  | 1.8  | 4.0  | glucan 1,3-beta-glucosidase                                                |
| CA0827 | orf19.7884  | <i>IPF18859</i>    | 1.0  | -1.3 | -1.2 | -1.2 | YGL080W |               | 1.0 | -1.1 | 1.0  | -1.8 | unknown function                                                           |
| CA0828 | orf19.7882  | <i>IPF17186</i>    | 1.3  | 1.2  | 1.1  | 1.4  | YDR533C |               | 1.0 | 1.2  | -1.2 | -1.2 | unknown function                                                           |
| CA0829 | orf19.250   | <i>SLC1</i>        | 1.2  | 1.1  | 1.3  | 1.1  | YDL052C | <i>SLC1</i>   | 1.0 | -1.3 | -1.4 | -1.3 | fatty acyltransferase (by homology)                                        |
| CA0830 | orf19.7879  | <i>APL5</i>        | -1.0 | -1.0 | -1.0 | -1.0 | YPL195W | <i>APL5</i>   | 1.0 | 1.0  | 1.1  | 1.0  | AP-3 complex subunit, gamma-adaptin (by homology)                          |
| CA0832 | orf19.9244  | <i>IPF14225</i>    | -1.1 | -1.6 | -1.5 | -1.4 | YDL133W |               | 1.0 | 1.0  | -1.1 | -1.0 | unknown function                                                           |
| CA0833 | orf19.9245  | <i>IPF12501</i>    | -1.1 | -1.1 | -1.0 | -1.1 | YDL183C |               | 1.0 | -1.1 | -1.2 | -1.2 | unknown function                                                           |
| CA0838 | orf19.9249  | <i>TFP1</i>        | -1.3 | -1.1 | 1.1  | 1.0  | YDL185W | <i>TFP1</i>   | 1.0 | -1.0 | 1.1  | -1.1 | vacuolar ATPase subunit (by homology)                                      |
| CA0842 | orf19.1053  | <i>IPF15633</i>    | -1.1 | 1.0  | -1.0 | 1.1  | YFL025C | <i>BST1</i>   | 1.0 | -1.5 | -1.8 | -1.7 | similar to Saccharomyces cerevisiae Bst1p egative regulator of COPII ve    |
| CA0843 | orf19.8656  | <i>IPF18853</i>    | -1.0 | -1.1 | -1.2 | -1.1 | YLL023C |               | 1.0 | -2.4 | -2.2 | -1.9 | unknown function                                                           |
| CA0844 | orf19.8657  | <i>CDC3</i>        | -1.0 | -1.1 | -1.1 | 1.0  | YLR314C | <i>CDC3</i>   | 1.0 | 1.0  | 1.1  | -1.1 | Cell division control protein                                              |
| CA0846 | orf19.7895  | <i>SMC3</i>        | -1.1 | 1.0  | -1.1 | -1.1 | YJL074C | <i>SMC3</i>   | 1.0 | 1.3  | 1.5  | -1.1 | required for structural maintenance of chromosomes (by homology)           |
| CA0848 | orf19.1743  | <i>ACS1</i>        | -1.0 | -2.1 | -2.0 | -1.8 | YAL054C | <i>ACS1</i>   | 1.0 | -3.4 | -3.5 | -3.7 | acetyl-coenzyme-A synthetase (by homology)                                 |
| CA0849 | orf19.9311  | <i>HEM4</i>        | -1.0 | 1.0  | 1.1  | -1.1 | YOR278W | <i>HEM4</i>   | 1.0 | -1.0 | 1.1  | 1.0  | uroporphyrinogen III synthase                                              |
| CA0851 | orf19.9313  | <i>IPF16670</i>    | -1.0 | 1.1  | 1.2  | 1.1  | YOR242C | <i>SSP2</i>   | 1.0 | -1.0 | -1.3 | -1.4 | unknown function                                                           |
| CA0852 | orf19.9315  | <i>KIP2</i>        | -1.0 | -1.1 | -1.1 | -1.0 | YPL155C | <i>KIP2</i>   | 1.0 | -1.4 | 1.1  | -1.0 | Kinesin-related protein required for nuclear migration (by homology)       |
| CA0854 | orf19.4900  | <i>IPF8854</i>     | -1.3 | -1.2 | -1.3 | -1.1 | YER001W | <i>MNN1</i>   | 1.0 | -1.5 | -1.6 | -1.2 | similar to Saccharomyces cerevisiae Mnn1p alpha-1,3-mannosyltransferase    |
| CA0859 | orf19.11946 | <i>IPF14495.3</i>  | -1.0 | -1.0 | -1.0 | 1.0  | YLR246W | <i>ERF2</i>   | 1.0 | 1.0  | 1.1  | 1.2  | similar to Saccharomyces cerevisiae Erf2p involved in palmitoylation and   |
| CA0862 | orf19.3524  | <i>CRK1.5F</i>     | -1.1 | -1.1 | -1.7 | -1.3 | YPR161C | <i>SGV1</i>   | 1.0 | -1.0 | 1.0  | 1.1  | Protein kinase, 5-prime end                                                |
| CA0863 | orf19.3526  | <i>ITR2</i>        | 1.1  | 1.3  | 2.3  | 1.5  | YOL103W | <i>ITR2</i>   | 1.0 | -1.1 | 1.1  | 1.1  | Myo-inositol transporter (by homology)                                     |
| CA0864 | orf19.3527  | <i>CYT1</i>        | -1.3 | -1.5 | -1.4 | -1.3 | YOR065W | <i>CYT1</i>   | 1.0 | 1.0  | 1.4  | -1.7 | cytochrome-c1 (by homology)                                                |
| CA0866 | orf19.3585  | <i>IPF14775</i>    | 1.0  | 1.0  | -1.0 | 1.1  | YNR046W |               | 1.0 | 1.1  | 1.1  | 1.3  | unknown function                                                           |
| CA0869 | orf19.3589  | <i>IPF14772</i>    | -1.1 | -1.0 | 1.0  | -1.0 | YHL022C | <i>SPO11</i>  | 1.0 | -1.1 | -1.1 | -1.2 | unknown function                                                           |
| CA0870 | orf19.3590  | <i>IPP1</i>        | 1.4  | -1.1 | -1.0 | -1.3 | YBR011C | <i>IPP1</i>   | 1.0 | -1.3 | -1.3 | -1.2 | inorganic pyrophosphatase (by homology)                                    |
| CA0871 | orf19.3591  | <i>APE3</i>        | 1.1  | 1.1  | 1.0  | 1.1  | YBR286W | <i>APE3</i>   | 1.0 | 1.4  | 1.8  | 1.6  | aminopeptidase (by homology)                                               |
| CA0872 | orf19.3592  | <i>IPF13100</i>    | -1.0 | 1.0  | 1.0  | -1.0 | YJL073W | <i>JEM1</i>   | 1.0 | -1.0 | 1.0  | 1.3  | unknown function                                                           |
| CA0873 | orf19.12099 | <i>BUL1</i>        | -1.3 | -1.0 | -1.2 | 1.1  | YMR275C | <i>BUL1</i>   | 1.0 | 1.1  | 1.2  | 1.5  | Ubiquitin ligase binding protein                                           |
| CA0874 | orf19.12100 | <i>CPA1</i>        | -1.0 | 1.1  | 1.0  | 1.0  | YOR303W | <i>CPA1</i>   | 1.0 | -1.4 | -1.3 | 1.3  | Arginine-specific carbamoylphosphate synthase, small chain                 |
| CA0876 | orf19.7996  | <i>VMA6</i>        | 1.1  | 1.0  | -1.0 | 1.0  | YLR447C | <i>VMA6</i>   | 1.0 | 1.1  | 1.3  | 1.6  | H+-ATPase V0 domain 36 KD subunit,vacuolar (by homology)                   |
| CA0877 | orf19.8000  | <i>CNH1.5F</i>     | -1.1 | 1.0  | -1.1 | -1.1 | YLR138W | <i>NHA1</i>   | 1.0 | -1.2 | 1.0  | 1.2  | Na+/H+ antiporter, 5-prime end (by homology)                               |
| CA0880 | orf19.372   | <i>IPF19542.3F</i> | 1.2  | 1.1  | 1.3  | -1.0 | YER163C |               | 1.0 | -1.2 | -1.1 | -1.2 | unknown function, 3-prime end                                              |
| CA0881 | orf19.8006  | <i>IPF16965</i>    | -1.0 | 1.3  | 1.3  | 1.2  | YOR256C |               | 1.0 | -1.4 | -1.3 | -1.4 | unknown function                                                           |
| CA0882 | orf19.8010  | <i>PHR3</i>        | 1.1  | 1.0  | 1.1  | 1.1  | YOL132W |               | 1.0 | -1.2 | -1.3 | -1.1 | surface glycoprotein (by homology)                                         |
| CA0883 | orf19.3642  | <i>SUN41</i>       | 1.4  | 1.3  | 1.5  | 1.3  | YIL123W | <i>SIM1</i>   | 1.0 | 1.1  | 1.5  | 1.6  | Putative cell wall beta-glucosidase (by homology)                          |
| CA0885 | orf19.1389  | <i>IPF12381</i>    | 1.2  | -1.3 | -1.2 | -1.1 | YIR001C | <i>SGN1</i>   | 1.0 | -1.3 | -1.4 | -1.3 | unknown function                                                           |
| CA0886 | orf19.1388  | <i>IPF12382</i>    | 1.2  | 1.0  | -1.0 | -1.1 | YER002W |               | 1.0 | -1.4 | -1.3 | -1.4 | unknown function                                                           |
| CA0887 | orf19.1387  | <i>IPF12383</i>    | 1.1  | 2.3  | 2.3  | 2.3  | YIL003W | <i>DRE3</i>   | 1.0 | -1.1 | -1.1 | -1.1 | unknown function                                                           |
| CA0888 | orf19.1386  | <i>BET1</i>        | 1.1  | 1.1  | 1.1  | 1.0  | YIL004C | <i>BET1</i>   | 1.0 | 1.3  | 1.1  | 1.1  | involved in ER-Golgi transport (by homology)                               |
| CA0891 | orf19.4735  | <i>IPF11764</i>    | 1.0  | -1.2 | -1.3 | -1.1 | YGL159W |               | 1.0 | 1.2  | 1.3  | 1.4  | unknown function                                                           |
| CA0892 | orf19.4736  | <i>PHO8.5</i>      | -1.1 | 1.3  | 1.6  | 1.5  | YDR481C | <i>PHO8</i>   | 1.0 | -1.0 | 1.1  | 1.3  | repressible alkaline phosphatase, 5-prime end (by homology)                |
| CA0893 | orf19.5752  | <i>IPF13517</i>    | -1.1 | -1.0 | -1.0 | -1.0 | YBR280C |               | 1.0 | -1.6 | -2.0 | -1.7 | unknown function                                                           |
| CA0894 | orf19.5751  | <i>ORM1</i>        | -1.1 | -1.0 | 1.1  | 1.0  | YGR038W | <i>ORM1</i>   | 1.0 | 1.1  | 1.1  | -1.1 | unknown function                                                           |
| CA0895 | orf19.5750  | <i>SHM2</i>        | -1.2 | -1.5 | -1.5 | -1.4 | YLR058C | <i>SHM2</i>   | 1.0 | -2.2 | -2.6 | -1.8 | Serine hydroxymethyltransferase precursor,                                 |
| CA0896 | orf19.5749  | <i>SBA1</i>        | 1.2  | 1.3  | 1.3  | 1.2  | YKL117W | <i>SBA1</i>   | 1.0 | -1.0 | 1.2  | -1.1 | Hsp90 (Ninety) Associated Co-chaperone (by homology)                       |
| CA0898 | orf19.412   | <i>SSH1.3</i>      | 1.1  | -1.1 | 1.3  | 1.2  | YBR283C | <i>SSH1</i>   | 1.0 | -1.4 | -1.3 | -1.0 | involved in co-translational pathway of protein transport, 3-prime end (by |
| CA0900 | orf19.3411  | <i>IPF12031</i>    | 1.1  | 1.2  | 1.2  | 1.1  | YNR027W | <i>BUD17</i>  | 1.0 | -1.1 | -1.1 | 1.1  | unknown function                                                           |
| CA0901 | orf19.3412  | <i>IPF12033</i>    | -1.0 | 1.1  | 1.0  | 1.0  | YCR068W | <i>CVT17</i>  | 1.0 | -1.4 | -1.2 | -1.2 | unknown function                                                           |
| CA0903 | orf19.1480  | <i>IPF4401</i>     | 1.5  | -1.0 | -1.0 | 1.0  | YMR118C |               | 1.0 | -1.0 | -1.1 | -1.1 | putative succinate dehydrogenase (by homology)                             |
| CA0906 | orf19.1483  | <i>IPF4406</i>     | 1.0  | 1.0  | 1.0  | 1.0  | YKL137W |               | 1.0 | -1.2 | -1.3 | -1.5 | unknown function                                                           |
| CA0908 | orf19.1485  | <i>MRPL31</i>      | 1.3  | 1.1  | 1.2  | 1.1  | YKL138C | <i>MRPL31</i> | 1.0 | 1.0  | -1.1 | -1.4 | Mitochondrial ribosomal protein                                            |
| CA0910 | orf19.9569  | <i>MRPL16</i>      | 1.3  | -1.0 | -1.1 | 1.1  | YBL038W | <i>MRPL16</i> | 1.0 | -1.6 | -1.7 | 1.1  | ribosomal protein                                                          |
| CA0911 | orf19.9568  | <i>IPF14814</i>    | 1.0  | -1.0 | 1.0  | 1.0  | YJR097W |               | 1.0 | -1.4 | -1.4 | -1.5 | unknown function                                                           |
| CA0912 | orf19.9567  | <i>RPA49</i>       | 1.0  | 1.0  | 1.0  | -1.0 | YNL248C | <i>RPA49</i>  | 1.0 | -1.1 | -1.1 | -1.1 | DNA-directed RNA polymerase A (by homology)                                |
| CA0913 | orf19.9566  | <i>IPF14810</i>    | 1.2  | 1.1  | 1.3  | 1.2  | YER044C | <i>ERG28</i>  | 1.0 | 1.4  | 1.4  | 1.1  | unknown function                                                           |
| CA0914 | orf19.9565  | <i>SRA1</i>        | -1.7 | -1.4 | -1.6 | -1.4 | YIL033C | <i>BCY1</i>   | 1.0 | 1.2  | 1.3  | -1.1 | cAMP dependent protein kinase, regulatory subunit (by homology)            |
| CA0915 | orf19.9564  | <i>KAR2</i>        | -1.2 | 1.3  | 1.1  | 1.2  | YJL034W | <i>KAR2</i>   | 1.0 | -1.1 | 1.1  | 1.3  | dnak-type molecular chaperone (by homology)                                |

|        |             |             |      |      |      |      |         |        |     |      |      |      |                                                                                             |
|--------|-------------|-------------|------|------|------|------|---------|--------|-----|------|------|------|---------------------------------------------------------------------------------------------|
| CA0916 | orf19.2970  | LYS2        | 1.1  | 1.1  | -1.0 | -1.1 | YBR115C | LYS2   | 1.0 | -3.1 | -5.3 | -2.9 | L-aminoadipate-semialdehyde dehydrogenase, large subunit                                    |
| CA0917 | orf19.2969  | RAD16       | -1.0 | 1.1  | 1.3  | 1.1  | YBR114W | RAD16  | 1.0 | -1.2 | -1.3 | -1.4 | nucleotide excision repair protein (by homology)                                            |
| CA0918 | orf19.1041  | IPF17881    | -1.0 | -1.0 | 1.1  | -1.0 | YJL006C | CTK2   | 1.0 | -1.0 | -1.1 | -1.1 | cyclin (by homology)                                                                        |
| CA0919 | orf19.1042  | POR1        | 1.6  | -1.4 | -1.3 | -1.3 | YNL055C | POR1   | 1.0 | -1.1 | -1.2 | -1.7 | mitochondrial outer membrane porin (by homology)                                            |
| CA0921 | orf19.1043  | IPF12992    | 1.1  | 1.1  | 1.2  | 1.0  | YPR139C |        | 1.0 | 1.0  | 1.0  | 1.0  | unknown function                                                                            |
| CA0922 | orf19.1045  | IPF12991    | 1.0  | -1.1 | -1.1 | -1.0 | YIR005W | IST3   | 1.0 | 1.0  | 1.0  | -1.1 | unknown function                                                                            |
| CA0923 | orf19.1047  | IPF12987    | -1.0 | -1.0 | 1.0  | 1.0  | YMR049C | ERB1   | 1.0 | -1.1 | 1.1  | 1.4  | unknown function                                                                            |
| CA0926 | orf19.3663  | IPF11335    | -1.1 | -1.0 | 1.3  | 1.1  | YNR013C | PHO91  | 1.0 | -1.0 | 1.1  | 1.2  | Member of the phosphate permease family (by homology)                                       |
| CA0927 | orf19.3661  | IPF11332    | -1.2 | -1.0 | -1.2 | 1.0  | YPL072W | UBP16  | 1.0 | -1.4 | -1.1 | -1.0 | unknown function                                                                            |
| CA0929 | orf19.558   | GUT1        | -1.0 | -1.7 | -1.9 | -1.9 | YHL032C | GUT1   | 1.0 | -1.9 | -2.3 | -2.4 | Glycerol kinase (by homology)                                                               |
| CA0932 | orf19.3695  | EPT1        | 1.4  | 1.1  | 1.3  | 1.1  | YHR123W | EPT1   | 1.0 | -1.2 | -1.5 | -1.3 | alcohol phosphatidyl transferase (by homology)                                              |
| CA0933 | orf19.8678  | ATM1        | -1.1 | -1.0 | -1.2 | -1.1 | YMR301C | ATM1   | 1.0 | 1.1  | 1.3  | 1.0  | ATP-binding cassette transporter (by homology)                                              |
| CA0935 | orf19.1079  | IPF14203.5F | 1.0  | 1.0  | -1.0 | 1.0  | YFL030W |        | 1.0 | -1.5 | -1.4 | -3.2 | similarity to several transaminases, 5-prime end (by homology)                              |
| CA0938 |             | COX12       | 1.4  | 1.2  | 1.5  | 1.6  | YLR038C | COX12  | 1.0 | -1.4 | -1.3 | -1.9 | cytochrome-c oxidase, subunit VIB (by homology)                                             |
| CA0939 | orf19.3704  | DBP6        | -1.0 | -1.1 | -1.2 | -1.1 | YNR038W | DBP6   | 1.0 | 1.0  | 1.0  | 1.1  | RNA helicase required for 60S ribosomal subunit assembly (by homology)                      |
| CA0940 |             | IPF8616     | 1.1  | 1.0  | 1.0  | -1.0 | YNR037C | RSM19  | 1.0 | -1.1 | 1.0  | 1.1  | similar to Saccharomyces cerevisiae Rsm19p ribosomal protein (by homology)                  |
| CA0941 | orf19.3705  | IPF8617     | -1.1 | 1.0  | -1.0 | 1.0  | YCR079W |        | 1.0 | -1.0 | -1.1 | -1.1 | unknown function                                                                            |
| CA0943 | orf19.3707  | YHB1        | -1.1 | 4.4  | 5.1  | 6.2  | YGR234W | YHB1   | 1.0 | 1.4  | 1.9  | 1.9  | flavo-hemoglobin (by homology)                                                              |
| CA0945 | orf19.8853  | IPF10278    | -1.2 | -1.2 | -1.5 | -1.2 | YER048C | CAJ1   | 1.0 | 1.3  | 1.2  | 1.1  | DNA-J - like protein (by homology)                                                          |
| CA0948 | orf19.1272  | IPF10270    | -1.2 | -1.2 | -1.1 | -1.0 | YGR111W |        | 1.0 | 1.0  | -1.0 | -1.3 | unknown function                                                                            |
| CA0949 | orf19.8859  | IPF10269    | 1.1  | 1.1  | 1.1  | 1.1  | YNL153C | GIM3   | 1.0 | -1.1 | 1.3  | 1.5  | Gim complex component-like by homology                                                      |
| CA0950 | orf19.1012  | IPF3737     | 1.4  | 1.4  | 2.0  | 1.6  | YLR170C | APS1   | 1.0 | 1.0  | 1.2  | 1.2  | similar to Saccharomyces cerevisiae Aps1p AP-1 complex subunit, signal transduction         |
| CA0951 | orf19.1011  | MNN6        | -1.3 | 1.2  | 1.1  | 1.1  | YBR015C | MNN2   | 1.0 | 1.0  | -1.2 | 1.2  | putative golgi alpha-1,2-mannosyltransferase (by homology)                                  |
| CA0954 | orf19.1142  | IPF13162    | 1.1  | 1.1  | 1.3  | 1.2  | YNL101W |        | 1.0 | 1.0  | 1.2  | 1.1  | unknown function                                                                            |
| CA0956 | orf19.12191 | IPF14914    | -1.1 | -1.1 | -1.2 | -1.1 | YIL112W |        | 1.0 | -1.2 | -1.0 | -1.3 | putative ankyrin (by homology)                                                              |
| CA0957 |             | IPF14322    | 1.0  | 1.0  | -1.0 | 1.0  | YNL051W | COD4   | 1.0 | -2.1 | -1.7 | -1.8 | unknown function                                                                            |
| CA0958 | orf19.12194 | SEC24       | 1.0  | 1.6  | 1.5  | 1.5  | YIL109C | SEC24  | 1.0 | 1.1  | 1.5  | 1.2  | component of COPII coat of ER-Golgi vesicles (by homology)                                  |
| CA0959 | orf19.657   | SAM2        | 1.0  | -1.0 | -1.1 | -1.1 | YDR502C | SAM2   | 1.0 | 1.8  | 2.3  | 2.9  | S-adenosylmethionine synthetase 2                                                           |
| CA0963 | orf19.6246  | IPF9143     | 1.0  | 1.1  | 1.1  | 1.1  | YPR131C | NAT3   | 1.0 | -1.0 | -1.1 | -1.2 | similar to Saccharomyces cerevisiae Nat3p N-acetyltransferase (by homology)                 |
| CA0964 | orf19.6247  | IPF9141     | -1.1 | 1.0  | -1.0 | -1.0 | YPR135W | CTF4   | 1.0 | -1.4 | -1.4 | -1.4 | similar to Saccharomyces cerevisiae Ctf4p DNA-directed DNA polymerase                       |
| CA0969 | orf19.12987 | IPF9132     | 1.4  | 1.5  | 1.6  | 1.3  | YPL184C |        | 1.0 | -1.1 | 1.1  | 1.3  | unknown function                                                                            |
| CA0970 | orf19.10340 | IPF10894    | 1.1  | 1.0  | 1.0  | -1.1 | YGR120C | SEC35  | 1.0 | -1.4 | -1.3 | -1.3 | unknown function                                                                            |
| CA0972 | orf19.6472  | CYP1        | 1.1  | 1.2  | 1.1  | 1.1  | YDR155C | CPH1   | 1.0 | -1.2 | -1.2 | -1.1 | cyclophilin (peptidylprolyl isomerase), mitochondrial (by homology)                         |
| CA0977 | orf19.11087 | IPF18810    | -1.0 | 1.3  | 1.3  | 1.2  | YNL215W | IES2   | 1.0 | 1.2  | -1.1 | -1.0 | unknown function                                                                            |
| CA0978 | orf19.3603  | IPF16222    | 1.0  | 1.0  | 1.0  | -1.1 | YDL233W |        | 1.0 | -1.6 | -1.2 | -1.4 | unknown function                                                                            |
| CA0982 | orf19.1800  | IPF7397     | 1.1  | 1.6  | 2.0  | 1.5  | YGR141W |        | 1.0 | 1.2  | 1.1  | 1.0  | unknown function                                                                            |
| CA0983 | orf19.1801  | CBR1        | 1.0  | -1.1 | -1.0 | -1.1 | YIL043C | CBR1   | 1.0 | 1.1  | 1.3  | 1.4  | Cytochrome-b5 reductase (by homology)                                                       |
| CA0984 | orf19.1802  | IPF7400     | -1.0 | 1.1  | 1.0  | 1.1  | YER049W |        | 1.0 | 1.0  | 1.3  | 2.2  | unknown function                                                                            |
| CA0986 | orf19.3350  | IPF4814     | -1.0 | -1.0 | -1.1 | -1.1 | YDR405W | MRP20  | 1.0 | -1.1 | -1.0 | 1.1  | similar to Saccharomyces cerevisiae MRP20p ribosomal protein of the large ribosomal subunit |
| CA0987 | orf19.3349  | RPB140      | -1.2 | -1.2 | -1.9 | -1.4 | YOR151C | RPB2   | 1.0 | -1.4 | 1.0  | 1.0  | DNA-dependent RNA polymerase II RPB140                                                      |
| CA0988 | orf19.8968  | PMI40       | -1.0 | 1.4  | 1.9  | 1.6  | YER003C | PMI40  | 1.0 | -1.1 | 1.3  | 1.1  | mannose-6-phosphate isomerase (PHOSPHOMANNANOSE ISOMERASE)                                  |
| CA0990 | orf19.1392  | IPF11068    | -1.3 | -1.1 | -1.1 | -1.1 | YIL005W |        | 1.0 | 1.2  | 1.1  | 1.2  | unknown function                                                                            |
| CA0991 | orf19.8971  | IPF11065    | -1.0 | -1.1 | 1.0  | -1.0 | YIL006W |        | 1.0 | -1.2 | -1.3 | -1.4 | unknown function                                                                            |
| CA0992 | orf19.8972  | IPF11063    | 1.1  | -1.0 | 1.0  | 1.0  | YCR090C |        | 1.0 | -1.2 | -1.2 | -1.0 | unknown function                                                                            |
| CA1002 | orf19.3756  | ROK1.3      | -1.0 | 1.0  | 1.1  | -1.0 | YGL171W | ROK1   | 1.0 | -1.6 | -1.4 | -1.3 | RNA helicase, 3-prime end                                                                   |
| CA1003 | orf19.3757  | ATP20       | 1.4  | -1.0 | 1.2  | 1.0  | YPR020W | ATP20  | 1.0 | -1.2 | -1.4 | -1.7 | F1FO-ATPase complex, G subunit (by homology)                                                |
| CA1004 | orf19.3758  | IPF8901     | -1.1 | -1.1 | 1.2  | 1.0  | YDR105C |        | 1.0 | 1.2  | 1.4  | 1.3  | unknown function                                                                            |
| CA1005 | orf19.3759  | LPG7        | -1.0 | -1.0 | -1.1 | -1.1 | YPL101W | TOT7   | 1.0 | 1.0  | 1.2  | 1.2  | probable membrane protein (by homology)                                                     |
| CA1007 | orf19.3760  | DLH1.3F     | -1.0 | 1.0  | 1.1  | 1.1  | YER179W | DMG1   | 1.0 | -1.4 | -1.4 | -1.7 | meiotic recombination protein, 3-prime end                                                  |
| CA1008 | orf19.6254  | IPF14083    | -1.1 | -1.1 | -1.1 | -1.0 | YPR128C | ANT1   | 1.0 | -1.7 | -2.0 | -1.9 | similarity to Saccharomyces cerevisiae carrier protein Flx1p (by homology)                  |
| CA1009 | orf19.6255  | IPF14084    | 1.0  | -1.3 | -1.2 | -1.1 | YGR117C |        | 1.0 | 1.5  | 1.5  | 1.7  | unknown function                                                                            |
| CA1010 | orf19.6257  | GLT1.3EOC   | -1.0 | -1.1 | -1.1 | 1.1  | YDL171C | GLT1   | 1.0 | -1.1 | -1.1 | -1.0 | glutamate synthase (NAPDPH), 3-prime end (by homology)                                      |
| CA1011 | orf19.11434 | SRP101      | -1.2 | 1.1  | -1.2 | -1.2 | YDR292C | SRP101 | 1.0 | -1.9 | -1.5 | -1.1 | signal recognition particle receptor, alpha chain (by homology)                             |
| CA1012 | orf19.11436 | PSD2.5F     | 1.0  | 1.1  | 1.1  | 1.1  | YGR170W | PSD2   | 1.0 | 1.0  | 1.0  | -1.1 | phosphatidylserine decarboxylase 2, 5-prime end (by homology)                               |
| CA1014 | orf19.11437 | MES1        | -1.1 | 1.0  | 1.1  | 1.0  | YGR264C | MES1   | 1.0 | -1.2 | 1.5  | 2.2  | methionyl-tRNA synthetase (by homology)                                                     |
| CA1015 | orf19.11438 | IPF15547    | 1.0  | 1.0  | 1.1  | -1.0 | YMR293C |        | 1.0 | -1.1 | -1.5 | -1.4 | putative glutamyl-tRNA amidotransferase subunit A (by homology)                             |
| CA1016 | orf19.473   | IPF11142    | -1.0 | 1.1  | 1.3  | 1.3  | YOR273C | TPO4   | 1.0 | -1.0 | 1.1  | -1.0 | unknown function                                                                            |
| CA1017 | orf19.8105  | IPF11144    | 1.0  | -1.0 | 1.1  | -1.0 | YHR036W |        | 1.0 | -1.2 | -1.2 | -1.1 | unknown function                                                                            |
| CA1019 | orf19.3769  | IPF13485    | -1.1 | -1.0 | 1.1  | 1.0  | YNR039C | ZRG17  | 1.0 | -1.1 | -1.1 | 1.1  | unknown function                                                                            |
| CA1020 | orf19.10863 | IPF4824     | -1.1 | 1.3  | 1.3  | 1.2  | YOR155C |        | 1.0 | 1.4  | 1.6  | 1.1  | unknown function                                                                            |
| CA1024 | orf19.3934  | CAR1        | 1.0  | -1.7 | -2.0 | -1.6 | YPL111W | CAR1   | 1.0 | 1.2  | 1.3  | -1.3 | arginase by homology                                                                        |

|        |             |                      |      |      |      |      |         |              |     |      |      |      |                                                                                    |
|--------|-------------|----------------------|------|------|------|------|---------|--------------|-----|------|------|------|------------------------------------------------------------------------------------|
| CA1025 | orf19.3936  | <i>IPF10184</i>      | 1.1  | 1.0  | -1.1 | -1.0 | YPL110C |              | 1.0 | -1.1 | -1.2 | -1.4 | unknown function                                                                   |
| CA1027 |             | <i>IPF19645.EXO1</i> | 1.0  | -1.1 | -1.1 | -1.1 | YPR040W | <i>SDF1</i>  | 1.0 | -1.2 | 1.1  | -1.0 | unknown function, exon 2                                                           |
| CA1029 | orf19.9112  | <i>TLG2</i>          | 1.1  | 1.1  | -1.0 | 1.1  | YOL018C | <i>TLG2</i>  | 1.0 | -1.3 | -1.3 | -1.1 | Syntaxin family of t-SNAREs (by homology)                                          |
| CA1030 | orf19.9111  | <i>ZRC1</i>          | -1.0 | -1.0 | 1.2  | 1.0  | YMR243C | <i>ZRC1</i>  | 1.0 | 1.5  | 1.4  | 1.7  | Zinc and cadmium resistance protein (by homology)                                  |
| CA1033 | orf19.8642  | <i>MAD2</i>          | -1.0 | -1.0 | -1.1 | 1.0  | YJL030W | <i>MAD2</i>  | 1.0 | -1.3 | -1.3 | -1.2 | spindle checkpoint complex subunit (by homology)                                   |
| CA1034 | orf19.8641  | <i>3ET4.EXON2</i>    | -1.0 | -1.0 | -1.0 | -1.0 | YJL031C | <i>BET4</i>  | 1.0 | 1.0  | 1.1  | 1.0  | alpha subunit of geranylgeranyl transferase type 2, exon 2                         |
| CA1037 | orf19.8638  | <i>MNS1</i>          | -1.1 | -1.1 | 1.0  | -1.1 | YJR131W | <i>MNS1</i>  | 1.0 | -1.1 | -1.1 | -1.0 | Alpha1,2-mannosidase (by homology)                                                 |
| CA1038 | orf19.8637  | <i>IPF6159</i>       | -1.1 | -1.1 | -1.1 | 1.0  | YML076C |              | 1.0 | -1.1 | 1.2  | 1.4  | unknown function                                                                   |
| CA1039 | orf19.2501  | <i>IPF4012</i>       | 1.2  | -1.1 | 1.0  | -1.0 | YPL221W | <i>BOP1</i>  | 1.0 | -1.3 | -1.2 | 1.0  | Unknown Function                                                                   |
| CA1041 | orf19.2504  | <i>BMS1</i>          | -1.2 | -1.3 | -1.3 | -1.1 | YPL217C | <i>BMS1</i>  | 1.0 | -1.4 | -1.3 | -1.1 | probable membrane protein involved in bud site selection (by homology)             |
| CA1043 | orf19.9219  | <i>TOM6</i>          | 1.0  | -1.1 | 1.1  | -1.1 | YOR045W | <i>TOM6</i>  | 1.0 | 1.1  | -1.1 | -1.8 | mitochondrial outer membrane import receptor subunit (by homology)                 |
| CA1044 | orf19.9218  | <i>RNA1</i>          | -1.2 | -1.4 | -1.4 | -1.3 | YMR235C | <i>RNA1</i>  | 1.0 | 1.2  | 1.2  | 1.6  | GTPase activating protein (by homology)                                            |
| CA1045 | orf19.1648  | <i>IPF11620</i>      | -1.1 | -1.1 | 1.0  | -1.0 | YNL250W | <i>RAD50</i> | 1.0 | 1.1  | 1.3  | 1.3  | similar to <i>Saccharomyces cerevisiae</i> Rad50p DNA repair protein (by homology) |
| CA1046 | orf19.1647  | <i>IPF11617</i>      | -1.0 | 1.0  | -1.0 | -1.0 | YOR298W |              | 1.0 | -1.5 | 1.3  | 1.5  | unknown function                                                                   |
| CA1047 | orf19.9215  | <i>IPF11615</i>      | -1.1 | -1.0 | -1.1 | -1.1 | YPR112C | <i>MRD1</i>  | 1.0 | -1.2 | 1.0  | 1.2  | RNA-binding proteins (by homology)                                                 |
| CA1048 | orf19.3899  | <i>IPF15394</i>      | 1.1  | -1.0 | 1.0  | 1.1  | YDR469W | <i>SDC1</i>  | 1.0 | -1.3 | -1.2 | 1.0  | unknown function                                                                   |
| CA1049 | orf19.3898  | <i>TLG1</i>          | 1.0  | 1.1  | 1.0  | 1.0  | YDR468C | <i>TLG1</i>  | 1.0 | 1.3  | 1.2  | 1.1  | tSNARE that affects a Late Golgi compartment (by homology)                         |
| CA1053 | orf19.3893  | <i>SCW11.3.EOC</i>   | 1.1  | 1.2  | 1.3  | -1.0 | YGL028C | <i>SCW11</i> | 1.0 | 1.0  | 1.2  | 1.7  | glucanase gene family member, 3-prime end (by homology)                            |
| CA1054 | orf19.2540  | <i>SAS3</i>          | 1.1  | 1.1  | 1.2  | 1.1  | YBL052C | <i>SAS3</i>  | 1.0 | 1.1  | 1.0  | 1.0  | silencing protein (by homology)                                                    |
| CA1055 | orf19.2541  | <i>IPF17504</i>      | -1.1 | -1.1 | -1.1 | 1.0  | YBL055C |              | 1.0 | -1.3 | -1.7 | -1.2 | unknown function                                                                   |
| CA1057 | orf19.2544  | <i>IPF17031</i>      | 1.0  | -1.0 | -1.1 | -1.0 | YBL057C |              | 1.0 | -1.1 | -1.1 | -1.0 | unknown function                                                                   |
| CA1058 | orf19.2545  | <i>DOT6</i>          | 1.1  | -1.1 | -1.0 | 1.0  | YER088C | <i>DOT6</i>  | 1.0 | 1.1  | 1.6  | 1.3  | involved in derepression of telomeric silencing (by homology)                      |
| CA1059 | orf19.10080 | <i>TRP2</i>          | -1.1 | -1.0 | -1.1 | -1.0 | YER090W | <i>TRP2</i>  | 1.0 | 1.2  | 1.6  | 1.7  | anthranilate synthase component I (by homology)                                    |
| CA1060 | orf19.267   | <i>IPF11460</i>      | 1.0  | 1.1  | -1.1 | 1.0  | YJL076W | <i>NET1</i>  | 1.0 | 1.1  | 1.1  | 1.3  | unknown function                                                                   |
| CA1063 | orf19.4641  | <i>NMT1</i>          | -1.1 | -1.2 | -1.2 | -1.2 | YLR195C | <i>NMT1</i>  | 1.0 | -1.2 | 1.0  | -1.1 | N-myristoyltransferase                                                             |
| CA1064 | orf19.12110 | <i>PWP1</i>          | -1.0 | -1.2 | -1.3 | -1.1 | YLR196W | <i>PWP1</i>  | 1.0 | 1.1  | 1.4  | 1.9  | beta-transducin superfamily (by homology)                                          |
| CA1066 | orf19.12107 | <i>IPF9001</i>       | -1.0 | -1.0 | 1.1  | -1.0 | YLR097C |              | 1.0 | -1.3 | -1.5 | -1.6 | unknown function                                                                   |
| CA1067 | orf19.2023  | <i>HXT62</i>         | 1.3  | 45.4 | 34.6 | 42.5 | YDR345C | <i>HXT3</i>  | 1.0 | 8.7  | 11.4 | 9.1  | sugar transporter                                                                  |
| CA1070 | orf19.2020  | <i>HXT61</i>         | 1.2  | 4.6  | 8.0  | 3.9  | YDR343C | <i>HXT6</i>  | 1.0 | 7.1  | 10.3 | 3.3  | sugar transporter                                                                  |
| CA1071 | orf19.2534  | <i>IPF16624</i>      | 1.1  | 1.1  | 1.0  | -1.0 | YBL051C | <i>PIN4</i>  | 1.0 | -1.1 | -1.1 | -1.1 | unknown function                                                                   |
| CA1073 | orf19.2533  | <i>PRORS.3F</i>      | -1.1 | -1.2 | -1.3 | -1.2 | YER087W |              | 1.0 | -1.1 | -1.3 | -1.3 | prolyl-tRNA synthetase, 3-prime end                                                |
| CA1076 | orf19.2239  | <i>IPF19721</i>      | 1.0  | 1.0  | 1.0  | -1.0 | YAL024C | <i>LTE1</i>  | 1.0 | 1.0  | -1.0 | -1.1 | similar to <i>Saccharomyces cerevisiae</i> Lte1p GDP/GTP exchange factor           |
| CA1080 | orf19.4820  | <i>IPF14710</i>      | -1.0 | -1.1 | 1.0  | 1.0  | YKL162C |              | 1.0 | -1.2 | -1.5 | -1.8 | unknown function                                                                   |
| CA1087 | orf19.8357  | <i>MYO5</i>          | 1.1  | 1.1  | 1.1  | -1.0 | YMR109W | <i>MYO5</i>  | 1.0 | -1.3 | -1.2 | -1.0 | Myosin I (by homology)                                                             |
| CA1089 | orf19.3945  | <i>IPF13799</i>      | -1.1 | -1.1 | -1.1 | -1.0 | YJR084W |              | 1.0 | -1.0 | -1.1 | -1.1 | unknown function                                                                   |
| CA1090 | orf19.3946  | <i>COX18</i>         | -1.0 | 1.0  | 1.3  | 1.1  | YGR062C | <i>COX18</i> | 1.0 | -1.1 | -1.2 | -1.1 | protein required for activity of mitochondrial cytochrome oxidase (by homology)    |
| CA1091 | orf19.3947  | <i>SPT4</i>          | 1.1  | -1.0 | 1.1  | 1.1  | YGR063C | <i>SPT4</i>  | 1.0 | 1.2  | -1.1 | 1.1  | transcription elongation protein (by homology)                                     |
| CA1092 | orf19.3949  | <i>YTA7</i>          | -1.1 | -1.0 | -1.2 | -1.1 | YGR270W | <i>YTA7</i>  | 1.0 | -1.5 | -1.6 | -1.3 | 26S proteasome subunit (by homology)                                               |
| CA1093 | orf19.3950  | <i>MSM1</i>          | 1.0  | 1.0  | -1.0 | -1.0 | YGR171C | <i>MSM1</i>  | 1.0 | 1.0  | -1.0 | -1.0 | mitochondrial methionyl-tRNA synthetase                                            |
| CA1094 | orf19.3951  | <i>YIP1</i>          | 1.2  | 1.2  | 1.4  | 1.3  | YGR172C | <i>YIP1</i>  | 1.0 | 1.1  | 1.0  | -1.1 | golgi membrane protein (by homology)                                               |
| CA1095 | orf19.4367  | <i>SMC1</i>          | -1.2 | -1.1 | -1.3 | -1.1 | YFL008W | <i>SMC1</i>  | 1.0 | -1.3 | -1.3 | -1.1 | Chromosomal ATPase family member (by homology)                                     |
| CA1102 | orf19.4950  | <i>AKR1</i>          | 1.1  | 1.3  | 1.6  | 1.5  | YDR264C | <i>AKR1</i>  | 1.0 | -1.1 | -1.0 | 1.1  | ankyrin repeat-containing protein by homology                                      |
| CA1103 | orf19.12413 | <i>IPF5673</i>       | 1.0  | 1.1  | -1.0 | 1.0  | YLR107W | <i>REX3</i>  | 1.0 | -1.8 | -1.6 | -1.5 | similar to <i>Saccharomyces cerevisiae</i> Rex3p RNA exonuclease (by homology)     |
| CA1104 |             | <i>IPF18761</i>      | 1.2  | 1.3  | 1.6  | 1.4  | YPR098C |              | 1.0 | -1.5 | -1.7 | -2.0 | unknown function                                                                   |
| CA1106 | orf19.12697 | <i>IPF11270</i>      | 1.1  | 1.0  | 1.0  | -1.0 | YOL077C | <i>BRX1</i>  | 1.0 | 1.7  | 2.2  | 2.3  | unknown function                                                                   |
| CA1109 | orf19.5230  | <i>MRPS9</i>         | 1.1  | -1.0 | -1.0 | 1.0  | YBR146W | <i>MRPS9</i> | 1.0 | 1.2  | 1.4  | 1.2  | ribosomal protein S9 small subunit precursor                                       |
| CA1110 | orf19.5229  | <i>DIS3</i>          | -1.3 | -1.1 | -1.2 | -1.2 | YOL021C | <i>DIS3</i>  | 1.0 | 1.2  | 1.3  | 1.8  | 3-5 exoribonuclease required for 3' end formation of 5.8S rRNA (by homology)       |
| CA1111 | orf19.12693 | <i>RIB3</i>          | 1.1  | 1.3  | 1.4  | 1.1  | YDR487C | <i>RIB3</i>  | 1.0 | 1.3  | 1.3  | 1.6  | 3,4-dihydroxy-2-butanone 4-phosphate synthase (by homology)                        |
| CA1114 | orf19.2286  | <i>IPF9995</i>       | 1.0  | 1.1  | 1.2  | 1.0  | YJR070C |              | 1.0 | 1.2  | 1.4  | 1.6  | unknown function                                                                   |
| CA1115 | orf19.2287  | <i>RPA12</i>         | 1.0  | -1.0 | -1.0 | -1.0 | YJR063W | <i>RPA12</i> | 1.0 | -2.1 | -1.7 | -1.5 | DNA-directed RNA polymerase I (by homology)                                        |
| CA1116 | orf19.2288  | <i>CCT5</i>          | -1.3 | -1.0 | -1.1 | 1.0  | YJR064W | <i>CCT5</i>  | 1.0 | 1.1  | 1.7  | 2.3  | T-complex protein 1, epsilon subunit (by homology)                                 |
| CA1117 | orf19.2289  | <i>ARP3</i>          | -1.1 | 1.2  | 1.1  | 1.1  | YJR065C | <i>ARP3</i>  | 1.0 | -1.2 | 1.0  | 1.2  | actin related protein (by homology)                                                |
| CA1121 | orf19.1604  | <i>IPF6730</i>       | -1.2 | 1.0  | -1.1 | -1.0 | YLR368W |              | 1.0 | 1.3  | 1.3  | 1.1  | Unknown function                                                                   |
| CA1122 | orf19.1605  | <i>PMS1.3</i>        | -1.0 | -1.1 | -1.1 | 1.0  | YNL082W | <i>PMS1</i>  | 1.0 | -2.2 | 1.2  | 1.4  | DNA mismatch repair protein, 3-prime end (by homology)                             |
| CA1123 | orf19.6261  | <i>IPF19723</i>      | -1.2 | -1.1 | -1.3 | -1.0 | YCR032W | <i>BPH1</i>  | 1.0 | -1.3 | -1.4 | -1.5 | similar to <i>Saccharomyces cerevisiae</i> Bph1p involved in acetic acid export    |
| CA1124 | orf19.6260  | <i>UBP12</i>         | -1.1 | -1.1 | -1.3 | -1.1 | YJL197W | <i>UBP12</i> | 1.0 | -1.2 | -1.2 | -1.1 | ubiquitin C-terminal hydrolase (by homology)                                       |
| CA1125 | orf19.6259  | <i>RRP43</i>         | -1.0 | -1.1 | -1.1 | -1.1 | YCR035C | <i>RRP43</i> | 1.0 | 1.2  | 1.1  | 1.2  | rRNA processing protein (by homology)                                              |
| CA1127 | orf19.3608  | <i>MSH3</i>          | -1.5 | -1.5 | -1.5 | -1.4 | YCR092C | <i>MSH3</i>  | 1.0 | 1.2  | 1.5  | 1.5  | DNA mismatch repair by homology                                                    |
| CA1128 | orf19.3609  | <i>IPF5198</i>       | -1.1 | -1.2 | -1.1 | -1.1 | YMR093W |              | 1.0 | -1.1 | -1.1 | 1.2  | unknown function                                                                   |
| CA1134 | orf19.2163  | <i>IPF2702</i>       | 1.0  | -1.0 | 1.1  | -1.0 | YBR074W |              | 1.0 | 1.4  | 1.9  | 1.5  | unknown function                                                                   |
| CA1135 | orf19.1981  | <i>IMP2</i>          | -1.0 | 1.0  | -1.0 | 1.0  | YMR035W | <i>IMP2</i>  | 1.0 | -1.1 | -1.1 | -1.0 | mitochondrial inner membrane protease subunit (by homology)                        |



|        |             |                   |      |      |      |      |         |               |     |      |      |      |                                                                                 |
|--------|-------------|-------------------|------|------|------|------|---------|---------------|-----|------|------|------|---------------------------------------------------------------------------------|
| CA1144 | orf19.11168 | <i>SPS19</i>      | 1.1  | -2.6 | -3.6 | -2.6 | YNL202W | <i>SPS19</i>  | 1.0 | 1.2  | 1.2  | -1.0 | peroxisomal 2,4-dienoyl-CoA reductase (by homology)                             |
| CA1145 | orf19.11167 | <i>GCS1</i>       | -1.1 | -1.0 | -1.1 | -1.1 | YDL226C | <i>GCS1</i>   | 1.0 | 1.1  | 1.3  | 2.0  | ADP-ribosylation factor GTPase-activating protein (ARF-GAP) (by homol           |
| CA1146 | orf19.3682  | <i>CWH8</i>       | 1.5  | -1.9 | -1.6 | -1.8 | YGR036C | <i>CAX4</i>   | 1.0 | -1.1 | 1.1  | 1.3  | putative required protein for full levels of dolichol-linked oligosaccharides   |
| CA1147 | orf19.11165 | <i>KAP95</i>      | 1.1  | -1.0 | 1.2  | 1.0  | YLR347C | <i>KAP95</i>  | 1.0 | -1.1 | 1.1  | 1.3  | karyopherin-beta protein (by homology)                                          |
| CA1154 | orf19.105   | <i>MET221</i>     | 1.0  | -1.0 | -1.0 | 1.0  | YOL064C | <i>MET22</i>  | 1.0 | 1.1  | 1.2  | 1.6  | protein ser/thr phosphatase (by homology)                                       |
| CA1155 | orf19.107   | <i>JA2</i>        | -1.1 | -1.3 | -1.2 | -1.1 | YKL078W |               | 1.0 | -1.5 | -1.4 | -1.2 | ATP-dependent RNA helicases-like (by homology)                                  |
| CA1156 | orf19.4123  | <i>RLR1</i>       | -1.2 | -1.2 | -1.5 | -1.3 | YNL139C | <i>RLR1</i>   | 1.0 | -1.4 | -1.3 | -1.5 | hypothetical regulatory protein (by homology)                                   |
| CA1157 | orf19.4125  | <i>PZF1</i>       | 1.0  | -1.0 | 1.0  | 1.0  | YPR186C | <i>PZF1</i>   | 1.0 | -1.2 | -1.0 | 1.0  | TFIIIA (transcription initiation factor) (by homology)                          |
| CA1158 | orf19.4127  | <i>IPF13275</i>   | -1.2 | 1.1  | 1.0  | 1.1  | YHR016C | <i>YSC84</i>  | 1.0 | 1.3  | 1.1  | -1.0 | unknown function                                                                |
| CA1160 | orf19.2726  | <i>IPF10262</i>   | -1.0 | 1.1  | 1.0  | 1.1  | YKL051W |               | 1.0 | 1.3  | 1.2  | 2.0  | unknown function                                                                |
| CA1161 | orf19.2727  | <i>GRX3</i>       | 1.1  | 1.0  | 1.2  | 1.1  | YDR098C | <i>GRX3</i>   | 1.0 | -1.1 | -1.1 | -1.0 | glutaredoxin-like protein                                                       |
| CA1162 | orf19.2728  | <i>IPF10258</i>   | -1.0 | -1.0 | -1.0 | 1.0  | YER173W | <i>RAD24</i>  | 1.0 | -1.4 | -1.3 | -1.1 | similar to <i>Saccharomyces cerevisiae</i> Rad24p cell cycle checkpoint protei  |
| CA1163 | orf19.2730  | <i>IPF15357</i>   | -1.1 | 1.1  | 1.0  | 1.0  | YER169W | <i>RPH1</i>   | 1.0 | 1.0  | 1.0  | 1.2  | unknown function                                                                |
| CA1164 | orf19.10867 | <i>ARP8</i>       | -1.2 | -1.1 | -1.2 | -1.1 | YOR141C | <i>ARP8</i>   | 1.0 | -1.4 | -1.4 | -1.3 | actin-related protein (by homology)                                             |
| CA1167 | orf19.1782  | <i>IPF16646</i>   | 1.2  | 1.4  | 1.5  | 1.6  | YEL001C |               | 1.0 | -1.1 | -1.0 | 1.4  | unknown function                                                                |
| CA1170 | orf19.2749  | <i>IPF13268</i>   | -1.1 | -1.0 | -1.1 | -1.0 | YDR132C |               | 1.0 | -1.2 | -1.0 | -1.0 | unknown function                                                                |
| CA1172 | orf19.2747  | <i>RGT1</i>       | -1.3 | -1.4 | -1.3 | -1.3 | YKL038W | <i>RGT1</i>   | 1.0 | -1.5 | -1.4 | -1.4 | Regulator of glucose-induced genes (by homology)                                |
| CA1175 | orf19.4766  | <i>ARG81</i>      | -1.1 | -1.1 | -1.2 | -1.1 | YML099C | <i>ARG81</i>  | 1.0 | -1.0 | 1.3  | 1.4  | transcription factor possibly involved in arginine metabolism, 3-prime end      |
| CA1176 | orf19.807   | <i>CHS5</i>       | -1.0 | -1.1 | -1.3 | -1.1 | YLR330W | <i>CHS5</i>   | 1.0 | 1.1  | 1.2  | 1.3  | Chitin biosynthesis protein                                                     |
| CA1177 | orf19.806   | <i>VMA7</i>       | 1.1  | 1.0  | 1.1  | 1.1  | YGR020C | <i>VMA7</i>   | 1.0 | -1.5 | -1.6 | -1.4 | vacuolar ATPase (by homology)                                                   |
| CA1178 | orf19.805   | <i>IPF5062</i>    | 1.0  | 1.0  | -1.0 | 1.0  | YGR021W |               | 1.0 | -1.3 | -1.3 | -1.6 | unknown function                                                                |
| CA1179 | orf19.804   | <i>IPF5064</i>    | -1.0 | -1.5 | -1.6 | -1.2 | YPR011C |               | 1.0 | 1.1  | -1.1 | -1.1 | ADP/ATP carrier protein (by homology)                                           |
| CA1182 | orf19.801   | <i>IPF19724</i>   | -1.1 | -1.1 | -1.1 | -1.1 | YPL128C | <i>TBF1</i>   | 1.0 | -1.3 | -1.1 | -1.1 | similar to <i>Saccharomyces cerevisiae</i> Tbf1ptelomere repeat-binding factor  |
| CA1183 | orf19.11263 | <i>IPF14805</i>   | 1.1  | -1.0 | 1.1  | 1.1  | YBR220C |               | 1.0 | -1.8 | -1.7 | -1.7 | acetyl-coenzyme A transporter (by homology)                                     |
| CA1187 | orf19.11267 | <i>QRI7</i>       | 1.0  | 1.1  | 1.1  | 1.1  | YKR038C |               | 1.0 | 1.1  | 1.3  | 1.4  | putative glycoprotease (by homology)                                            |
| CA1188 |             | <i>RPL30.3</i>    | 1.9  | 1.3  | 1.4  | 1.4  | YGL030W |               | 1.0 | 1.4  | 2.4  | 2.5  | RNA binding, 3-prime end (by homology)                                          |
| CA1189 | orf19.11269 | <i>RPL24A</i>     | 1.1  | -1.3 | -1.4 | -1.1 | YGL031C | <i>RPL24A</i> | 1.0 | 1.4  | 1.6  | 1.7  | ribosomal protein L24 (by homology)                                             |
| CA1191 | orf19.111   | <i>CAN2</i>       | -1.0 | -1.3 | -1.5 | -1.1 | YEL063C | <i>CAN1</i>   | 1.0 | -1.4 | -1.2 | -1.1 | amino acid permease (by homology)                                               |
| CA1193 | orf19.7756  | <i>MSY1</i>       | 1.0  | -1.1 | 1.1  | -1.0 | YPL097W | <i>MSY1</i>   | 1.0 | -1.1 | -1.3 | -1.3 | tyrosyl-tRNA synthetase 8by homology                                            |
| CA1195 | orf19.7750  | <i>KAR5</i>       | -1.0 | -1.0 | -1.1 | 1.0  | YMR065W | <i>KAR5</i>   | 1.0 | -1.3 | -1.4 | -1.3 | nuclear fusion protein-like (by homology)                                       |
| CA1198 | orf19.10875 | <i>IPF10399</i>   | 1.1  | -1.2 | -1.1 | -1.1 | YNL177C |               | 1.0 | -1.4 | 1.0  | 1.2  | unknown function                                                                |
| CA1199 | orf19.10876 | <i>IPF10404</i>   | 1.0  | 3.4  | 5.8  | 2.7  | YBL049W |               | 1.0 | 1.3  | 1.5  | 1.2  | unknown function                                                                |
| CA1200 | orf19.12331 | <i>IPF10223</i>   | 1.0  | 1.1  | 1.1  | -1.0 | YJL187C | <i>SWE1</i>   | 1.0 | -1.1 | -1.1 | -1.0 | putative serine/threonine kinase                                                |
| CA1202 | orf19.12334 | <i>DBP3</i>       | 1.0  | -1.1 | -1.1 | -1.0 | YGL078C | <i>DBP3</i>   | 1.0 | -1.0 | 1.5  | 2.4  | ATP-dependent RNA helicase (HELICASE CA3) by homology                           |
| CA1204 | orf19.8486  | <i>IPF14524</i>   | -1.1 | 1.1  | 1.3  | 1.2  | YGL160W |               | 1.0 | 1.1  | 1.0  | 1.7  | unknown function                                                                |
| CA1205 | orf19.11257 | <i>SSK2</i>       | 1.1  | 1.1  | 1.0  | 1.0  | YNR031C | <i>SSK2</i>   | 1.0 | -1.4 | -1.1 | 1.2  | MAP kinase kinase kinase of the high osmolarity                                 |
| CA1207 | orf19.11256 | <i>PPG1</i>       | -1.1 | 1.2  | -1.0 | -1.0 | YNR032W | <i>PPG1</i>   | 1.0 | -1.0 | -1.1 | 1.0  | Phosphoprotein phosphatase PPG catalytic chain (by homology)                    |
| CA1209 | orf19.11254 | <i>ARG8</i>       | -1.0 | -1.0 | -1.1 | -1.1 | YOL140W | <i>ARG8</i>   | 1.0 | -2.0 | -1.3 | -1.2 | acetylmethionine aminotransferase (by homology)                                 |
| CA1210 | orf19.7778  | <i>IPF7030</i>    | -1.0 | 1.1  | -1.0 | -1.0 | YBR103W | <i>SIF2</i>   | 1.0 | -2.0 | -3.0 | -3.7 | unknown function                                                                |
| CA1211 |             | <i>IPF7031.3</i>  | 1.2  | 1.0  | 1.3  | 1.2  | YPR063C |               | 1.0 | -1.0 | 1.4  | 1.3  | unknown function, 3-prime end                                                   |
| CA1212 | orf19.7777  | <i>IPF7033</i>    | -1.1 | 1.0  | -1.0 | -1.1 | YPR057W | <i>BRR1</i>   | 1.0 | -1.7 | -1.2 | -1.2 | unknown function                                                                |
| CA1213 | orf19.7776  | <i>VPS15.5F</i>   | 1.0  | 1.0  | -1.0 | 1.1  | YBR097W | <i>VPS15</i>  | 1.0 | 1.1  | -1.0 | 1.1  | serine/threonine protein kinase, 5-prime end (by homology)                      |
| CA1218 | orf19.7769  | <i>CDC20</i>      | -1.0 | 1.1  | -1.2 | -1.1 | YGL116W | <i>CDC20</i>  | 1.0 | -1.2 | -1.2 | -1.2 | anaphase promoting complex subunit (by homology)                                |
| CA1220 | orf19.4134  | <i>IPF14985</i>   | -1.0 | -1.1 | 1.0  | 1.0  | YDR459C |               | 1.0 | -2.1 | -1.4 | -1.2 | unknown function                                                                |
| CA1221 | orf19.4133  | <i>IPF14872</i>   | 1.0  | -1.1 | -1.2 | -1.1 | YDR527W |               | 1.0 | -1.1 | -1.1 | 1.2  | unknown function                                                                |
| CA1223 | orf19.4131  | <i>IPF14870</i>   | 1.1  | 1.0  | 1.3  | 1.1  | YCL045C |               | 1.0 | -1.5 | -1.2 | -1.1 | unknown function                                                                |
| CA1226 | orf19.4159  | <i>IPF15660</i>   | 1.1  | -1.0 | 1.0  | -1.0 | YMR166C |               |     |      |      |      | putative mitochondrial carrier (by homology)                                    |
| CA1227 | orf19.4160  | <i>IPF16082</i>   | 1.1  | -1.2 | -1.1 | -1.2 | YDL104C | <i>QRI7</i>   | 1.0 | -1.2 | -1.1 | -1.2 | unknown function                                                                |
| CA1228 | orf19.4161  | <i>IPF16081</i>   | -1.0 | -1.1 | -1.0 | -1.0 | YDL105W | <i>QRI2</i>   | 1.0 | -1.1 | -1.0 | 1.1  | unknown function                                                                |
| CA1229 | orf19.4162  | <i>MLH1</i>       | -1.0 | 1.0  | -1.0 | 1.0  | YMR167W | <i>MLH1</i>   | 1.0 | -1.1 | -1.1 | -1.1 | DNA mismatch repair protein (by homology)                                       |
| CA1230 | orf19.4980  | <i>SSA4</i>       | -1.1 | 1.5  | 1.6  | 1.5  | YER103W | <i>SSA4</i>   | 1.0 | -1.5 | -1.1 | 1.4  | cahsp70 mRNA for heat shock                                                     |
| CA1231 | orf19.4981  | <i>IPF11817</i>   | -1.1 | -1.0 | 1.0  | 1.0  | YDL206W |               | 1.0 | 1.0  | -1.1 | -1.0 | unknown function                                                                |
| CA1235 | orf19.8332  | <i>IPF20079</i>   | 1.1  | 1.0  | 1.1  | 1.1  | YMR074C |               | 1.0 | -1.6 | -1.6 | -1.7 | unknown function                                                                |
| CA1236 | orf19.8333  | <i>YPT6</i>       | -1.1 | -1.0 | -1.1 | -1.0 | YLR262C | <i>YPT6</i>   | 1.0 | 1.3  | 1.2  | 1.4  | GTP-binding protein of the rab family (by homology)                             |
| CA1239 | orf19.717   | <i>HSP60</i>      | -1.2 | -1.3 | -1.3 | -1.3 | YLR259C | <i>HSP60</i>  | 1.0 | -1.4 | -1.4 | -1.9 | Heat Shock Protein 60 (HSP60)                                                   |
| CA1240 | orf19.8337  | <i>IPF14026</i>   | 1.1  | -1.1 | -1.0 | 1.0  | YML043C | <i>RRN11</i>  | 1.0 | -1.5 | -1.1 | -1.6 | similar to <i>Saccharomyces cerevisiae</i> Rrn11p involved in RNA polymeras     |
| CA1243 | orf19.8923  | <i>IPF7922</i>    | -1.0 | -1.0 | -1.0 | -1.0 | YNL236W | <i>SIN4</i>   | 1.0 | -1.2 | -1.2 | -1.1 | unknown function                                                                |
| CA1245 | orf19.7689  | <i>IMH3.EXON2</i> | 1.0  | -1.1 | 1.1  | 1.0  | YLR432W | <i>IMD3</i>   | 1.0 | 1.5  | 2.1  | 3.0  | IMP dehydrogenase, exon 2                                                       |
| CA1247 | orf19.20    | <i>IPF3870</i>    | -1.5 | 1.0  | -1.6 | -1.2 | YOR014W | <i>RTS1</i>   | 1.0 | -1.2 | 1.1  | 1.3  | similar to <i>Saccharomyces cerevisiae</i> Rts1p potential regulatory subunit o |
| CA1248 | orf19.7692  | <i>IPF3866</i>    | 1.0  | 1.1  | 1.0  | 1.0  | YLR251W |               | 1.0 | 1.1  | 1.2  | 1.0  | unknown function                                                                |
| CA1249 | orf19.4960  | <i>SPE4</i>       | 1.1  | -1.0 | -1.1 | -1.0 | YLR146C | <i>SPE4</i>   | 1.0 | -1.4 | -1.5 | -1.5 | spermine synthase (by homology)                                                 |

|        |             |                     |      |      |      |      |         |              |     |      |      |      |                                                                                  |
|--------|-------------|---------------------|------|------|------|------|---------|--------------|-----|------|------|------|----------------------------------------------------------------------------------|
| CA1251 | orf19.12423 | <i>IPF9624</i>      | 1.1  | -1.0 | 1.0  | 1.0  | YJL201W | <i>ECM25</i> | 1.0 | -1.4 | -1.4 | -1.4 | similar to <i>Saccharomyces cerevisiae</i> Ecm25p involved in cell wall biogen   |
| CA1252 | orf19.12421 | <i>RPN1</i>         | -1.1 | 1.1  | 1.1  | 1.1  | YHR027C | <i>RPN1</i>  | 1.0 | -1.0 | 1.4  | 1.3  | 26S proteasome regulatory subunit (by homology)                                  |
| CA1255 | orf19.1776  | <i>IPF9030</i>      | -1.0 | -1.0 | -1.0 | 1.0  | YGR277C |              | 1.0 | -1.2 | 1.1  | 1.1  | unknown function                                                                 |
| CA1256 | orf19.1777  | <i>UBP15</i>        | -1.5 | -1.3 | -1.4 | -1.2 | YMR304W | <i>UBP15</i> | 1.0 | 1.0  | 1.1  | -1.2 | ubiquitin-specific protease (by homology)                                        |
| CA1257 | orf19.10678 | <i>IPF18725</i>     | -1.1 | 1.1  | 1.1  | 1.0  | YOR262W |              | 1.0 | -1.0 | 1.3  | -1.0 | unknown function                                                                 |
| CA1258 | orf19.10677 | <i>RPN8</i>         | -1.2 | -1.0 | -1.1 | 1.0  | YOR261C | <i>RPN8</i>  | 1.0 | 1.3  | 1.8  | 1.4  | 26S proteasome regulatory subunit (by homology)                                  |
| CA1259 | orf19.10676 | <i>IPF3174</i>      | -1.1 | -1.0 | -1.0 | 1.0  | YPL172C | <i>COX10</i> | 1.0 | -1.1 | -1.1 | -1.1 | Farnesyl transferase (by homology)                                               |
| CA1260 | orf19.3166  | <i>IPF3170</i>      | 1.2  | 1.6  | 1.6  | 1.3  | YDR141C | <i>DOP1</i>  | 1.0 | -1.2 | -1.2 | -1.1 | unknown function                                                                 |
| CA1261 | orf19.1240  | <i>PF9887.3EOC</i>  | -1.4 | 1.1  | -1.5 | -1.2 | YPR117W |              | 1.0 | -1.0 | -1.1 | -1.1 | unknown function, 3-prime end                                                    |
| CA1262 | orf19.1244  | <i>MDR1</i>         | -1.0 | -1.1 | -1.0 | -1.1 | YGR100W | <i>MDR1</i>  | 1.0 | -1.1 | -1.2 | -1.3 | Mac1p interacting protein (by homology)                                          |
| CA1264 | orf19.239   | <i>STH1</i>         | 1.0  | -1.0 | -1.2 | -1.2 | YIL126W | <i>STH1</i>  | 1.0 | -1.6 | -1.7 | -1.6 | helicase related protein by homology                                             |
| CA1265 | orf19.240   | <i>IPF10510</i>     | -1.1 | -1.2 | -1.0 | -1.0 | YKR065C |              | 1.0 | -1.0 | -1.3 | -1.3 | unknown function                                                                 |
| CA1268 | orf19.3159  | <i>IPF14693</i>     | -1.1 | -1.0 | -1.3 | -1.1 | YBL004W |              | 1.0 | -1.7 | -1.6 | -1.1 | unknown function                                                                 |
| CA1269 | orf19.10667 | <i>IPF19726</i>     | -1.2 | -1.1 | -1.0 | -1.0 | YDL001W |              | 1.0 | -1.0 | 1.1  | 1.4  | unknown function                                                                 |
| CA1271 | orf19.2723  | <i>HIT1</i>         | -1.1 | -1.1 | -1.0 | -1.2 | YJR055W | <i>HIT1</i>  | 1.0 | -1.1 | -1.1 | -1.1 | required for growth at high temperature (by homology)                            |
| CA1272 | orf19.2722  | <i>CGR1</i>         | -1.1 | -1.1 | -1.1 | -1.1 | YBR053C |              | 1.0 | 1.3  | 1.1  | 1.0  | Cell growth protein (by homology)                                                |
| CA1273 | orf19.2720  | <i>CCT4</i>         | 1.0  | -1.1 | -1.2 | -1.1 | YDL143W | <i>CCT4</i>  | 1.0 | 1.3  | 1.6  | 2.3  | Component of chaperonin-containing T-complex                                     |
| CA1274 | orf19.2717  | <i>SAS10</i>        | -1.0 | -1.0 | -1.0 | 1.0  | YDL153C | <i>SAS10</i> | 1.0 | 1.7  | 2.0  | 2.1  | Involved in silencing (by homology)                                              |
| CA1275 | orf19.2715  | <i>RPC53</i>        | 1.0  | -1.3 | -1.3 | -1.2 | YDL150W | <i>RPC53</i> | 1.0 | -1.3 | 1.1  | 1.3  | DNA-directed RNA polymerase III (by homology)                                    |
| CA1277 | orf19.3630  | <i>IPF10837</i>     | -1.0 | -1.0 | -1.0 | -1.0 | YDR083W | <i>RRP8</i>  | 1.0 | -1.1 | 1.1  | 1.0  | unknown function                                                                 |
| CA1278 | orf19.3629  | <i>IPF10835</i>     | 1.0  | 1.1  | 1.1  | 1.0  | YER124C |              | 1.0 | 1.2  | 1.4  | 1.5  | unknown function                                                                 |
| CA1279 | orf19.3628  | <i>RSP5</i>         | -1.0 | 1.1  | 1.2  | 1.2  | YER125W | <i>RSP5</i>  | 1.0 | 1.1  | 1.0  | -1.1 | ubiquitin-protein ligase (by homology)                                           |
| CA1284 | orf19.8257  | <i>IPF10168.3</i>   | 1.0  | 1.0  | 1.0  | -1.0 | YJR089W | <i>BIR1</i>  | 1.0 | -1.6 | -1.0 | -1.0 | unknown function, 3-prime end                                                    |
| CA1285 | orf19.11905 | <i>SKP1</i>         | 1.4  | 1.1  | 1.1  | 1.3  | YDR328C | <i>SKP1</i>  | 1.0 | 1.1  | 1.4  | -1.0 | kinetochore protein complex CBF3 by homology                                     |
| CA1287 | orf19.4430  | <i>IPF5545</i>      | -1.1 | -1.1 | -1.3 | -1.1 | YDR330W |              | 1.0 | -1.4 | -1.1 | -1.3 | unknown function                                                                 |
| CA1288 | orf19.4432  | <i>KSP1</i>         | 1.2  | 1.3  | 1.6  | 1.4  | YHR082C | <i>KSP1</i>  | 1.0 | 1.7  | 2.2  | 3.5  | SERINE/THREONINE-PROTEIN KINASE by homology                                      |
| CA1289 | orf19.10224 | <i>ZUO1</i>         | -1.0 | 1.0  | -1.0 | -1.1 | YGR285C | <i>ZUO1</i>  | 1.0 | 1.4  | 1.5  | 1.9  | Zuotin, a putative Z-DNA binding (by homology)                                   |
| CA1290 | orf19.2710  | <i>IPF16212</i>     | -1.0 | 1.1  | 1.1  | 1.0  | YMR311C | <i>GLC8</i>  | 1.0 | 1.0  | 1.5  | 1.5  | unknown function                                                                 |
| CA1291 | orf19.2711  | <i>IPF16752</i>     | -1.5 | -1.2 | -1.4 | -1.3 | YGR200C | <i>ELP2</i>  | 1.0 | -1.2 | -1.1 | -1.1 | unknown function                                                                 |
| CA1292 |             | <i>SRB2.3</i>       | 1.0  | -1.0 | 1.1  | -1.0 | YHR041C | <i>SRB2</i>  | 1.0 | 1.1  | 1.1  | 1.2  | DNA-directed RNA polymerase II holoenzyme and Kornberg's mediator (              |
| CA1293 | orf19.2712  | <i>HCA4</i>         | -1.1 | -1.2 | -1.3 | -1.1 | YJL033W | <i>HCA4</i>  | 1.0 | -1.1 | 1.1  | -1.0 | Can suppress the U14 snoRNA rRNA processing function                             |
| CA1294 | orf19.10228 | <i>MSH5.3F</i>      | 1.0  | -1.0 | 1.0  | -1.0 | YDL154W | <i>MSH5</i>  | 1.0 | -1.2 | -1.3 | -1.1 | Meiosis-specific protein, 3-prime end (by homology)                              |
| CA1297 | orf19.3417  | <i>ACF2</i>         | 1.0  | -1.0 | -1.1 | 1.0  | YLR144C | <i>ACF2</i>  | 1.0 | -1.1 | -1.0 | 1.4  | endo-1,3-beta-glucanase                                                          |
| CA1298 |             | <i>RPL32</i>        | 1.5  | 1.2  | 1.2  | 1.3  | YBL092W | <i>RPL32</i> | 1.0 | -1.2 | -1.5 | 1.1  | ribosomal protein L32                                                            |
| CA1299 | orf19.3415  | <i>PTK2</i>         | 1.0  | -1.0 | -1.0 | -1.0 | YJR059W | <i>PTK2</i>  | 1.0 | -1.4 | -1.1 | -1.1 | serine /threonine protein kinase involved in polyamine uptake (by homol          |
| CA1300 | orf19.4199  | <i>SLY41</i>        | 1.0  | -1.0 | 1.1  | 1.1  | YOR307C | <i>SLY41</i> | 1.0 | 1.0  | 1.1  | 1.2  | vesicular transport (by homology)                                                |
| CA1301 | orf19.4197  | <i>YHM2</i>         | -1.4 | -3.6 | -4.4 | -2.7 | YMR241W | <i>YHM2</i>  | 1.0 | 1.0  | -1.0 | 1.2  | mtDNA stabilizing protein (by homology)                                          |
| CA1302 |             | <i>FCA1.3</i>       | 1.1  | 1.0  | 1.1  | 1.1  | YPR062W | <i>FCY1</i>  | 1.0 | 1.1  | 1.4  | 1.6  | cytosine deaminase, 3-prime end                                                  |
| CA1303 | orf19.4194  | <i>TFB4</i>         | -1.1 | -1.1 | -1.1 | -1.1 | YPR056W | <i>TFB4</i>  | 1.0 | -1.1 | -1.2 | -1.5 | component of RNA polymerase transcription initiation TFIIF factor (by ho         |
| CA1304 |             | <i>RPS13.3</i>      | 1.5  | 1.3  | 1.3  | 1.4  | YDR064W | <i>RPS13</i> | 1.0 | 1.3  | 1.1  | 1.9  | ribosomal protein, 3-prime end (by homology)                                     |
| CA1305 | orf19.4193  | <i>IPF13508</i>     | -1.0 | -1.0 | -1.1 | -1.1 | YDR063W |              | 1.0 | 1.4  | 1.2  | 1.2  | unknown function                                                                 |
| CA1306 | orf19.4192  | <i>CDC14.3</i>      | -1.1 | -1.1 | -1.1 | -1.0 | YFR028C | <i>CDC14</i> | 1.0 | -1.2 | -1.0 | 1.0  | protein phosphatase, 3-prime end                                                 |
| CA1314 | orf19.3639  | <i>MAG1</i>         | -1.0 | 1.0  | 1.1  | 1.0  | YER142C | <i>MAG1</i>  | 1.0 | -1.4 | -1.3 | -1.4 | 3-methyladenine DNA glycosylase (by homology)                                    |
| CA1315 | orf19.9896  | <i>URA2.5EOC</i>    | -1.0 | 2.6  | 3.2  | 2.5  | YJL130C | <i>URA2</i>  | 1.0 | -1.0 | 1.3  | 1.4  | multifunctional pyrimidine biosynthesis protein, 5-prime end (by homolog         |
| CA1318 | orf19.4219  | <i>IPF3147</i>      | -1.0 | -1.1 | -1.1 | -1.0 | YLL034C |              | 1.0 | 1.0  | 1.2  | 1.1  | Nuclear valosin-containing protein-like (by homology)                            |
| CA1319 | orf19.4220  | <i>IPF3144</i>      | 1.0  | 1.1  | 1.1  | 1.0  | YPR172W |              | 1.0 | -1.5 | -1.7 | -1.3 | unknown function                                                                 |
| CA1320 | orf19.4221  | <i>IPF3143</i>      | -1.0 | -1.1 | -1.1 | -1.1 | YPR162C | <i>ORC4</i>  | 1.0 | -1.0 | 1.2  | 1.2  | similar to <i>Saccharomyces cerevisiae</i> Orc4p subunit of origin recognition ( |
| CA1321 | orf19.4222  | <i>IPF3141</i>      | -1.0 | 1.0  | 1.0  | -1.1 | YLR452C | <i>SST2</i>  | 1.0 | -1.0 | -1.0 | 1.3  | similar to <i>Saccharomyces cerevisiae</i> Sst2p involved in desensitization to  |
| CA1322 | orf19.4223  | <i>GCD11</i>        | -1.0 | 1.1  | -1.1 | -1.1 | YER025W | <i>GCD11</i> | 1.0 | 1.2  | 1.8  | 2.5  | Translation initiation factor eIF2 (by homology)                                 |
| CA1324 | orf19.1308  | <i>IPF6676</i>      | 1.4  | -1.4 | -1.2 | -1.3 | YBR293W |              | 1.0 | -1.8 | -2.2 | -1.5 | polytopic membrane protein involved in drug transport (by homology)              |
| CA1327 | orf19.1305  | <i>IPF6680</i>      | 1.0  | -1.1 | 1.0  | 1.0  | YHR070W | <i>TRM5</i>  | 1.0 | -2.3 | -1.2 | -1.1 | unknown function                                                                 |
| CA1329 | orf19.1303  | <i>MRF2</i>         | -1.1 | -1.4 | -1.4 | -1.2 | YGL143C | <i>MRF1</i>  | 1.0 | -1.3 | -1.3 | -1.6 | peptide chain release factor, mitochondrial (by homology)                        |
| CA1335 | orf19.3451  | <i>TRA1</i>         | -1.1 | 1.2  | -1.1 | -1.0 | YHR099W | <i>TRA1</i>  | 1.0 | -1.8 | -1.5 | -1.1 | phosphatidylinositol kinase by homology                                          |
| CA1336 |             | <i>IPF5334.EXON</i> | 1.1  | 1.0  | -1.0 | 1.0  | YHR100C |              | 1.0 | -1.4 | -1.5 | -1.3 | unknown function, exon 2                                                         |
| CA1338 | orf19.10953 | <i>IPF5333</i>      | 1.0  | 1.0  | 1.0  | 1.1  | YDR266C |              | 1.0 | -1.3 | -1.1 | 1.1  | unknown function                                                                 |
| CA1340 | orf19.4339  | <i>VPS4</i>         | -1.1 | -1.0 | -1.1 | -1.0 | YPR173C | <i>VPS4</i>  | 1.0 | -1.2 | -1.1 | 1.1  | vacuolar sorting protein by homology to <i>S. cerevisiae</i>                     |
| CA1344 | orf19.4342  | <i>IPF14623</i>     | 1.1  | -1.6 | -1.8 | -1.6 | YPR009W |              | 1.0 | -1.3 | -1.0 | -1.0 | unknown function                                                                 |
| CA1345 | orf19.1490  | <i>IPF6003</i>      | -1.3 | 1.0  | 1.1  | -1.0 | YGR014W | <i>MSB2</i>  | 1.0 | -2.1 | -1.8 | -1.7 | similar to <i>Saccharomyces cerevisiae</i> Msb2p multicopy suppressor of a C     |
| CA1349 | orf19.4351  | <i>PRP12</i>        | -1.2 | 1.1  | -1.0 | -1.2 | YMR302C | <i>PRP12</i> | 1.0 | -1.4 | -1.2 | -1.3 | involved in early maturation of pre-rRNA (by homology)                           |
| CA1350 | orf19.4354  | <i>MCM2</i>         | -1.0 | -1.0 | -1.1 | 1.0  | YBL023C | <i>MCM2</i>  | 1.0 | 1.1  | -1.1 | 1.2  | replication licensing factor (by homology)                                       |
| CA1351 | orf19.403   | <i>PCL2</i>         | 1.0  | -1.1 | 1.0  | 1.0  | YDL127W | <i>PCL2</i>  | 1.0 | 1.1  | 1.1  | 1.1  | G1/S specific cyclin                                                             |



|        |             |             |      |      |      |      |         |        |     |      |      |      |                                                                          |
|--------|-------------|-------------|------|------|------|------|---------|--------|-----|------|------|------|--------------------------------------------------------------------------|
| CA1352 | orf19.405   | VCX1        | 1.1  | -1.1 | 1.1  | -1.0 | YDL128W | VCX1   | 1.0 | -1.1 | 1.0  | 1.1  | Ca2+-transport by homology                                               |
| CA1353 | orf19.406   | ERG1        | 1.2  | 1.6  | 2.4  | 2.0  | YGR175C | ERG1   | 1.0 | 1.0  | 1.5  | 3.5  | squalene epoxidase                                                       |
| CA1354 | orf19.407   | GCD6        | -1.0 | -1.1 | -1.2 | -1.1 | YDR211W | GCD6   | 1.0 | 1.2  | 1.4  | 1.4  | translation initiation factor- like protein                              |
| CA1356 | orf19.409   | IPF10138.5F | 1.1  | 2.4  | 2.1  | 2.0  | YNR018W |        | 1.0 | 1.1  | 1.2  | 1.5  | unknown function, 5-prime end                                            |
| CA1357 | orf19.410   | ARH1        | -1.1 | -1.2 | -1.4 | -1.0 | YDR376W | ARH1   | 1.0 | -1.3 | -1.5 | -1.7 | adrenodoxin reductase and ferredoxin-NADP+ reductase (by homology)       |
| CA1358 | orf19.4406  | NIF3        | -1.0 | -1.1 | -1.1 | -1.0 | YGL221C | NIF3   | 1.0 | -1.1 | -1.0 | -1.1 | Ngg1p-interacting factor 3 (by homology)                                 |
| CA1361 | orf19.4403  | PEP5        | -1.0 | -1.0 | -1.0 | -1.0 | YMR231W | PEP5   | 1.0 | -1.1 | 1.0  | -1.2 | vacuolar biogenesis protein (by homology)                                |
| CA1362 | orf19.4426  | PEX3        | -1.0 | -1.2 | -1.4 | -1.2 | YDR329C | PEX3   | 1.0 | -1.5 | -1.0 | -1.4 | PEROXISOMAL MEMBRANE PROTEIN by homology                                 |
| CA1365 | orf19.4459  | IPF11849    | 1.0  | 1.1  | 1.0  | 1.1  | YNL234W |        | 1.0 | -1.1 | 1.1  | 1.1  | unknown function                                                         |
| CA1366 | orf19.4457  | IPF11847    | 1.0  | 1.0  | 1.1  | -1.0 | YNL233W | BNI4   | 1.0 | -1.2 | -1.1 | -1.2 | unknown function                                                         |
| CA1367 | orf19.4966  | IPF16755    | -1.2 | -2.1 | -2.4 | -1.8 | YPR021C |        | 1.0 | -1.3 | -1.3 | -1.5 | unknown function                                                         |
| CA1369 | orf19.4964  | IPF15968    | -1.0 | -1.0 | 1.0  | 1.0  | YGL174W | BUD13  | 1.0 | -2.7 | -2.5 | -2.1 | unknown function                                                         |
| CA1370 | orf19.4963  | TCI1        | -1.2 | -1.2 | -1.2 | -1.1 | YDR161W | TCI1   | 1.0 | -1.2 | 1.2  | 1.2  | protein phosphatase Two C-Interacting protein (by homology)              |
| CA1371 | orf19.4962  | IPF19731    | 1.1  | 1.0  | 1.0  | -1.0 | YLR145W |        | 1.0 | 1.1  | -1.1 | -1.1 | unknown function                                                         |
| CA1372 | orf19.4961  | IPF15844    | 1.0  | 1.0  | 1.1  | 1.1  | YHR006W | STP2   | 1.0 | -1.0 | -1.0 | 1.1  | similar to Saccharomyces cerevisiae Stp2p involved in pre-tRNA splicing  |
| CA1373 | orf19.8784  | AGP1        | 1.4  | 1.7  | 1.2  | 1.5  | YDR508C | GNP1   | 1.0 | -1.8 | -1.1 | -1.2 | asparagine and glutamine permease (by homology)                          |
| CA1374 | orf19.1195  | MIP1        | -1.2 | 1.0  | 1.1  | -1.1 | YKL134C | 01-Oct | 1.0 | -1.7 | -1.8 | -2.2 | Mitochondrial intermediate peptidase (by homology)                       |
| CA1375 | orf19.8787  | IPF7158     | 1.0  | 1.1  | -1.0 | -1.0 | YDR466W |        | 1.0 | 1.2  | 1.2  | 1.1  | putative serine/threonine kinase                                         |
| CA1376 | orf19.8789  | IPF7159     | 1.1  | 1.1  | 1.0  | 1.0  | YBL107C |        | 1.0 | -1.5 | -1.4 | -1.1 | unknown function                                                         |
| CA1380 | orf19.458   | BCS1        | -1.0 | -1.1 | -1.1 | -1.0 | YDR375C | BCS1   | 1.0 | -1.6 | -1.8 | -1.7 | mitochondrial protein of the CDC48/PAS1/SEC18 (AAA) family of ATPas      |
| CA1383 | orf19.927   | IPF8422     | -1.1 | -1.0 | 1.0  | 1.0  | YML036W |        |     |      |      |      | unknown function                                                         |
| CA1384 | orf19.926   | IPF8423     | -1.0 | -1.1 | -1.3 | -1.1 | YOR033C | EXO1   | 1.0 | -1.1 | -1.0 | -1.1 | similar to Saccharomyces cerevisiae Dhs1p exonuclease (by homology)      |
| CA1386 | orf19.923   | THR1        | 1.1  | 1.5  | 1.5  | 1.4  | YHR025W | THR1   | 1.0 | -1.2 | 1.2  | 1.9  | homoserine kinase                                                        |
| CA1387 | orf19.922   | ERG16       | 1.2  | -1.2 | -1.0 | -1.0 | YHR007C | ERG11  | 1.0 | 1.3  | 1.5  | 2.0  | cytochrome P450 lanosterol 14a-demethylase                               |
| CA1389 | orf19.9338  | PLP2        | -1.1 | -1.1 | 1.2  | 1.1  | YOR281C | PLP2   | 1.0 | -1.2 | -1.7 | -1.4 | Might regulate Ste4p in pheromone response (by homology)                 |
| CA1392 | orf19.1767  | IPF6149     | -1.1 | -1.1 | -1.1 | -1.2 | YMR223W | UBP8   | 1.0 | -1.1 | 1.0  | 1.1  | similar to Saccharomyces cerevisiae Ubp8p deubiquinating enzyme (by t    |
| CA1396 | orf19.3701  | IPF8075     | -1.1 | 1.1  | -1.1 | -1.1 | YLR392C |        | 1.0 | 1.1  | 1.0  | -1.1 | unknown function                                                         |
| CA1397 | orf19.3700  | TOM72       | -1.9 | -1.9 | -2.4 | -2.0 | YNL121C | TOM70  | 1.0 | -1.3 | -1.4 | -1.4 | mitochondrial import receptor (by homology)                              |
| CA1398 | orf19.3699  | IPF19913    | -1.1 | -1.1 | -1.0 | -1.1 | YNL128W | TEP1   | 1.0 | -1.2 | -1.3 | -1.5 | unknown function                                                         |
| CA1399 | orf19.3698  | IPF8069     | 1.0  | 1.1  | 1.0  | -1.0 | YHR121W |        | 1.0 | -1.9 | -1.5 | -1.6 | unknown function                                                         |
| CA1400 | orf19.3697  | IPF8067     | 1.0  | -1.0 | -1.0 | -1.0 | YNL127W |        | 1.0 | -1.0 | 1.1  | -1.2 | unknown function                                                         |
| CA1401 | orf19.3696  | TOM22       | 1.0  | -1.0 | 1.0  | 1.0  | YNL131W | TOM22  | 1.0 | -1.3 | -1.7 | -2.2 | mitochondrial outer membrane import receptor complex subunit (by hom     |
| CA1403 | orf19.3373  | IPF14155    | 1.2  | 1.3  | 1.1  | 1.1  | YHL024W | RIM4   | 1.0 | 1.1  | 1.1  | 1.1  | similar to Saccharomyces cerevisiae Rim4p involved in sporulation (by h  |
| CA1404 | orf19.3372  | IPF19554.5F | -1.1 | -1.2 | -1.4 | -1.2 | YDL216C | RRI1   | 1.0 | -1.1 | -1.1 | 1.2  | unknown function, 5-prime end                                            |
| CA1406 | orf19.3370  | DOT4        | 1.1  | -1.2 | -1.2 | -1.1 | YNL186W | UBP10  | 1.0 | -1.1 | 1.4  | 1.8  | derepression of telomeric silencing (by homology)                        |
| CA1409 | orf19.2884  | SPT16       | -1.0 | 1.0  | 1.0  | -1.0 | YGL207W | SPT16  | 1.0 | -1.1 | 1.0  | 1.1  | general chromatin factor (by homology)                                   |
| CA1410 | orf19.1275  | GAT1        | -1.0 | 1.2  | 1.1  | 1.2  | YFL021W | GAT1   | 1.0 | 1.1  | 1.3  | 1.4  | nitrogen regulation (by homology)                                        |
| CA1413 | orf19.168   | MTR3        | -1.1 | -1.1 | -1.0 | -1.0 | YGR158C | MTR3   | 1.0 | 1.2  | 1.1  | 1.3  | Involved in mRNA transport (by homology)                                 |
| CA1414 | orf19.169   | CHO2        | -1.7 | -2.4 | -2.8 | -2.8 | YGR157W | CHO2   | 1.0 | 1.0  | 1.1  | 1.2  | phosphatidylethanolamine N-methyltransferase (by homology)               |
| CA1416 | orf19.171   | DBP2.EXON1  | 1.0  | 1.3  | 1.4  | 1.1  | YNL112W | DBP2   | 1.0 | 1.2  | 1.1  | 2.0  | ATP-dependent RNA helicase of DEAD box family, exon 1 (by homology)      |
| CA1417 | orf19.172   | IPF16126    | 1.2  | 1.1  | 1.4  | 1.1  | YNL113W | RPC19  | 1.0 | 1.1  | 1.0  | 1.3  | similar to Saccharomyces cerevisiae Rpc19p DNA-directed RNA polyme       |
| CA1418 | orf19.173   | IPF16124    | 1.1  | 1.1  | 1.4  | 1.1  | YOR113W | AZF1   | 1.0 | -2.1 | -1.3 | -1.4 | zinc-finger containing protein (by homology)                             |
| CA1420 | orf19.11277 | RNT1        | -1.1 | -1.1 | -1.1 | -1.0 | YMR239C | RNT1   | 1.0 | -1.1 | 1.1  | -1.0 | Ribonuclease III (by homology)                                           |
| CA1421 | orf19.11278 | MRPL11      | 1.1  | -1.3 | -1.2 | -1.1 | YDL202W | MRPL11 | 1.0 | 1.2  | 1.2  | -1.0 | Mitochondrial ribosomal protein (by komology)                            |
| CA1422 | orf19.3798  | IPF14248    | 1.0  | -1.1 | -1.1 | -1.0 | YDL201W |        | 1.0 | 1.0  | 1.0  | 1.3  | putative methyltransferase (by homology)                                 |
| CA1423 | orf19.3799  | IPF14247    | 1.3  | 1.5  | 1.6  | 1.6  | YDR233C |        | 1.0 | 1.7  | 2.6  | 3.2  | unknown function                                                         |
| CA1427 | orf19.5746  | IPF9914     | -1.0 | 1.0  | -1.1 | -1.1 | YOR335C | ALA1   | 1.0 | 1.3  | 1.9  | 2.1  | alanyl-tRNA synthetase (by homology)                                     |
| CA1428 | orf19.13170 | MRP4        | -1.3 | -1.5 | -1.4 | -1.3 | YHL004W | MRP4   | 1.0 | -1.0 | -1.2 | -1.2 | Ribosomal protein of the small subunit mitochondrial (by homology)       |
| CA1432 | orf19.1204  | APM3        | 1.0  | 1.1  | -1.0 | 1.0  | YBR288C | APM3   | 1.0 | 1.1  | -1.0 | 1.0  | AP-3 complex subunit, mu3 subunit (by homology)                          |
| CA1434 | orf19.1203  | SNI2        | -1.1 | -1.0 | -1.2 | -1.2 | YBL106C | SRO77  | 1.0 | -1.4 | -1.4 | -1.2 | Sec9 interacting protein (by homology)                                   |
| CA1436 | orf19.1201  | IPF7165     | -1.1 | -1.0 | -1.1 | -1.0 | YHR011W | DIA4   | 1.0 | -1.1 | -1.1 | -1.1 | similar to Saccharomyces cerevisiae Dia4p seryl-tRNA synthetase (by hc   |
| CA1438 | orf19.1199  | NOP58       | -1.3 | -1.3 | -1.7 | -1.6 | YOR310C | NOP58  | 1.0 | 1.7  | 2.3  | 3.1  | nucleolar protein required for pre-18S rRNA processing                   |
| CA1439 | orf19.4488  | IPF19602    | -1.6 | -1.6 | -1.9 | -1.6 | YJL176C | SWI3   | 1.0 | -1.4 | -1.7 | -1.6 | similar to Saccharomyces cerevisiae Swi3p transcription regulatory prote |
| CA1440 | orf19.4490  | RPL17B      | 1.0  | -1.3 | -1.1 | 1.0  | YJL177W | RPL17B | 1.0 | -1.0 | 1.5  | 1.6  | RPL17B ribosomal protein L17.e                                           |
| CA1441 |             | QCR8        | 1.5  | 1.0  | 1.1  | 1.1  | YJL166W | QCR8   | 1.0 | -1.5 | -1.4 | -2.5 | ubiquinol-cytochrome-c reductase chain VIII (by homology)                |
| CA1442 | orf19.4491  | ERG20       | -1.0 | -1.1 | -1.2 | -1.1 | YJL167W | ERG20  | 1.0 | -1.1 | 1.0  | -1.0 | farnesyl-pyrophosphate synthetase                                        |
| CA1443 | orf19.4492  | IPF4776     | -1.1 | -1.2 | -1.1 | 1.0  | YKL172W | EBP2   | 1.0 | -1.5 | -1.2 | 1.4  | unknown Function                                                         |
| CA1444 | orf19.4494  | KTR2        | -1.0 | 1.1  | 1.2  | -1.0 | YKR061W | KTR2   | 1.0 | -1.1 | 1.0  | 1.2  | mannosyltransferase (by homology)                                        |
| CA1445 | orf19.185   | MRP51       | 1.1  | -1.0 | -1.0 | 1.0  | YPL118W | MRP51  | 1.0 | -1.2 | -1.4 | -1.5 | Mitochondrial ribosomal protein of the small subunit (by homology)       |
| CA1447 | orf19.191   | NRK1        | 1.3  | -1.0 | -1.1 | -1.0 | YHR102W | KIC1   | 1.0 | -1.1 | -1.3 | -1.2 | Cdc31p-interacting ser/thr protein kinase (by homology)                  |
| CA1452 | orf19.4412  | REV1        | -1.1 | 1.0  | -1.1 | -1.1 | YOR346W | REV1   | 1.0 | 1.2  | 1.6  | 1.4  | DNA repair protein (by homology)                                         |

|        |             |                    |      |      |      |      |         |               |     |      |      |      |                                                                                 |
|--------|-------------|--------------------|------|------|------|------|---------|---------------|-----|------|------|------|---------------------------------------------------------------------------------|
| CA1453 | orf19.4411  | <i>HOS1</i>        | -1.1 | -1.1 | -1.0 | 1.0  | YPR068C | <i>HOS1</i>   | 1.0 | -1.7 | -1.6 | -1.4 | Putative histon deacetylase (by homology)                                       |
| CA1454 | orf19.4410  | <i>ALG1</i>        | -1.0 | -1.1 | -1.1 | 1.0  | YBR110W | <i>ALG1</i>   | 1.0 | -1.4 | -1.5 | -1.2 | beta-1,4-mannosyltransferase (by homology)                                      |
| CA1455 | orf19.4409  | <i>IPF15081</i>    | -1.0 | 1.0  | -1.0 | -1.0 | YCR026C |               | 1.0 | 1.1  | -1.0 | -1.0 | phosphodiesterase (by homology)                                                 |
| CA1457 | orf19.612   | <i>IPF8287</i>     | 1.1  | -1.0 | -1.0 | 1.0  | YML050W |               | 1.0 | -1.4 | -1.8 | -1.9 | unknown function                                                                |
| CA1460 | orf19.1108  | <i>HAM1</i>        | 1.0  | 1.0  | 1.1  | 1.1  | YJR069C | <i>HAM1</i>   | 1.0 | -1.0 | -1.1 | 1.1  | Controls 6-N-hydroxylaminopurine sensitivity and mutagenesis (by homo           |
| CA1462 | orf19.8707  | <i>THI80</i>       | 1.1  | -1.0 | 1.0  | 1.0  | YOR143C | <i>THI80</i>  | 1.0 | -1.8 | -1.5 | -1.1 | Thiamin pyrophosphokinase (by homology)                                         |
| CA1464 | orf19.789   | <i>PYC2.EXON2</i>  | -1.2 | 5.4  | 6.4  | 4.6  | YBR218C | <i>PYC2</i>   | 1.0 | -2.4 | -2.4 | -2.1 | Pyruvate carboxylase 2 (by homology)                                            |
| CA1467 | orf19.8412  | <i>IPF5082</i>     | 1.0  | 1.2  | 1.2  | 1.1  | YFL029C | <i>CAK1</i>   | 1.0 | -1.0 | -1.1 | -1.1 | similar to <i>Saccharomyces cerevisiae</i> Cak1p cdk-activating protein kinase  |
| CA1468 | orf19.794   | <i>SRB10</i>       | -1.0 | 1.0  | 1.0  | -1.1 | YPL042C | <i>SSN3</i>   | 1.0 | 1.0  | -1.0 | -1.0 | cyclin-dependent kinase by homology                                             |
| CA1469 | orf19.8414  | <i>IPF5078</i>     | -1.1 | 1.0  | 1.1  | 1.0  | YLR417W | <i>VPS36</i>  | 1.0 | -1.2 | -1.5 | -1.4 | unknown function                                                                |
| CA1470 | orf19.8415  | <i>IPF17942</i>    | 1.1  | 1.6  | 1.5  | 1.5  | YKL189W | <i>HYM1</i>   | 1.0 | -1.2 | -1.2 | -1.1 | unknown function                                                                |
| CA1475 | orf19.1095  | <i>GLE2</i>        | -1.0 | 1.1  | 1.1  | 1.0  | YER107C | <i>GLE2</i>   | 1.0 | -1.5 | -1.2 | -1.1 | nuclear pore complex structure and function-like protein (by homology)          |
| CA1477 | orf19.1252  | <i>YME1</i>        | -1.2 | -1.3 | -1.3 | -1.2 | YPR024W | <i>YME1</i>   | 1.0 | -1.1 | 1.5  | 1.2  | family of ATPases                                                               |
| CA1478 | orf19.1251  | <i>IPF16426</i>    | -1.0 | -1.1 | -1.1 | -1.1 | YBL097W | <i>BRN1</i>   | 1.0 | -1.5 | -1.8 | -1.1 | similar to human BRRN1 (by homology)                                            |
| CA1479 | orf19.1250  | <i>IPF16428</i>    | 1.1  | -1.1 | -1.2 | -1.1 | YIL019W |               | 1.0 | -1.3 | -1.3 | -1.4 | unknown function                                                                |
| CA1480 | orf19.1249  | <i>HIS6</i>        | 1.1  | 1.0  | -1.1 | -1.0 | YIL020C | <i>HIS6</i>   | 1.0 | -1.3 | -1.3 | -1.3 | 5 Pro-FAR isomerase                                                             |
| CA1481 | orf19.8832  | <i>RPB3</i>        | -1.0 | 1.1  | 1.1  | 1.0  | YIL021W | <i>RPB3</i>   | 1.0 | -1.1 | 1.0  | 1.0  | DNA-directed RNA-polymerase II (by homology)                                    |
| CA1483 | orf19.4059  | <i>YHC3</i>        | -1.1 | 1.1  | 1.1  | 1.1  | YJL059W | <i>YHC3</i>   | 1.0 | 1.2  | 1.0  | 1.2  | involved in cellular pH homeostasis (by homology)                               |
| CA1484 | orf19.4060  | <i>ARO4</i>        | -1.1 | 1.2  | 1.3  | 1.2  | YBR249C | <i>ARO4</i>   | 1.0 | 1.7  | 2.4  | 3.1  | 3-dehydro-deoxyphosphoheptonate aldolase, tyrosine-inhibited (by homc           |
| CA1485 | orf19.4061  | <i>IPF20082</i>    | 1.0  | 1.0  | -1.0 | -1.0 | YOR238W |               | 1.0 | -1.2 | -1.3 | -1.1 | unknown function                                                                |
| CA1488 | orf19.4064  | <i>IPF17402</i>    | 1.4  | 1.1  | 1.4  | 1.1  | YJL062W | <i>LAS21</i>  | 1.0 | -1.4 | 1.1  | 1.1  | unknown function                                                                |
| CA1489 | orf19.10734 | <i>ATP3.3</i>      | 1.2  | -1.4 | -1.2 | -1.2 | YBR039W | <i>ATP3</i>   | 1.0 | 1.0  | -1.3 | -1.0 | F1FO-ATPase complex, F1 gamma subunit, 3-prime end (by homology)                |
| CA1491 | orf19.3225  | <i>IPF166</i>      | -1.0 | -1.1 | -1.1 | -1.1 | YCR017C | <i>CWH43</i>  | 1.0 | -1.8 | -1.8 | -1.3 | unknown function                                                                |
| CA1492 | orf19.3226  | <i>IPF168</i>      | 1.1  | -1.0 | 1.1  | 1.0  | YDL046W |               | 1.0 | 1.0  | 1.1  | 1.1  | unknown function                                                                |
| CA1494 | orf19.3228  | <i>IPF171</i>      | -1.0 | -1.0 | 1.2  | 1.1  | YER113C |               | 1.0 | 1.1  | 1.1  | 1.4  | unknown function                                                                |
| CA1495 | orf19.3647  | <i>IPF9686</i>     | -1.1 | 1.0  | -1.0 | 1.0  | YPR055W | <i>SEC8</i>   | 1.0 | -1.4 | -1.2 | -1.1 | similar to <i>Saccharomyces cerevisiae</i> Sec8p Golgi - plasma membrane pr     |
| CA1496 | orf19.3646  | <i>CTR1</i>        | -1.1 | -2.1 | -2.2 | -3.4 | YPR124W | <i>CTR1</i>   | 1.0 | 1.1  | -1.0 | -1.4 | copper transport protein                                                        |
| CA1500 | orf19.1697  | <i>IPF13221</i>    | -1.0 | -1.0 | -1.1 | -1.0 | YOR091W |               | 1.0 | -1.2 | 1.0  | 1.0  | unknown function                                                                |
| CA1501 | orf19.9265  | <i>IPF13217</i>    | -1.0 | -1.2 | -1.3 | -1.2 | YNL094W |               | 1.0 | -1.6 | -1.2 | -1.3 | unknown function                                                                |
| CA1502 | orf19.9267  | <i>RPS7A</i>       | -1.1 | -1.1 | -1.0 | 1.1  | YOR096W | <i>RPS7A</i>  | 1.0 | 1.8  | 2.5  | 3.2  | ribosomal protein (by homology)                                                 |
| CA1503 | orf19.9268  | <i>RK11</i>        | 1.1  | -1.6 | -1.4 | -1.3 | YOR095C | <i>RK11</i>   | 1.0 | -1.4 | -1.1 | 1.1  | D-ribose-5-phosphate ketol-isomerase (by homology)                              |
| CA1506 | orf19.4527  | <i>HGT11</i>       | 1.5  | -2.3 | -4.2 | -3.6 | YFL040W |               | 1.0 | -1.0 | 1.5  | -1.7 | hexose transporter                                                              |
| CA1507 | orf19.4526  | <i>HSP30</i>       | 1.0  | -1.0 | 1.0  | 1.0  | YCR021C | <i>HSP30</i>  | 1.0 | -1.1 | 1.5  | 1.8  | heat shock protein (by homology)                                                |
| CA1508 | orf19.4525  | <i>IPF9977</i>     | 1.4  | 1.3  | 2.0  | 1.4  | YLR064W |               | 1.0 | -1.3 | 1.1  | 1.2  | unknown function                                                                |
| CA1510 | orf19.4523  | <i>IPF9973</i>     | 1.1  | -1.0 | 1.1  | 1.1  | YER183C | <i>FAU1</i>   | 1.0 | -1.1 | -1.2 | -1.2 | similar to <i>Saccharomyces cerevisiae</i> Fau1p 5,10-methenyltetrahydrofolat   |
| CA1511 | orf19.4522  | <i>PF9972.3EOO</i> | 1.0  | 1.1  | 1.2  | 1.1  | YMR073C |               | 1.0 | 1.0  | 1.1  | 1.1  | unknown function, 3-prime end                                                   |
| CA1512 | orf19.4884  | <i>IPF15255</i>    | 1.1  | 1.1  | 1.0  | 1.1  | YEL007W | <i>TOS9</i>   | 1.0 | -1.3 | -1.3 | -1.2 | unknown function                                                                |
| CA1513 | orf19.4885  | <i>MIR1</i>        | -1.0 | -1.0 | -1.0 | -1.1 | YJR077C | <i>MIR1</i>   | 1.0 | -1.3 | -1.2 | -1.3 | phosphate transport protein, mitochondrial (MCF) (by homology)                  |
| CA1515 | orf19.12351 | <i>ECM21.3</i>     | -1.1 | 1.2  | 1.1  | 1.2  | YBL101C | <i>ECM21</i>  | 1.0 | -1.1 | 1.1  | 1.1  | Involved in cell wall biogenesis and architecture (by homology)                 |
| CA1517 | orf19.4798  | <i>IPF11045</i>    | 1.1  | 1.0  | 1.1  | -1.0 | YMR212C | <i>EFR3</i>   | 1.0 | -1.1 | 1.5  | 1.8  | unknown function                                                                |
| CA1518 | orf19.4799  | <i>IPF11040</i>    | 1.1  | -1.0 | -1.0 | -1.0 | YMR213W | <i>CEF1</i>   | 1.0 | -1.1 | 1.1  | 1.2  | similar to <i>Schizosaccharomyces pombe</i> cdc5 myb-related protein require    |
| CA1519 | orf19.4800  | <i>RIM20</i>       | -1.1 | -1.0 | -1.0 | 1.0  | YOR275C |               | 1.0 | -1.2 | -1.2 | -1.2 | Rim101 activating protein                                                       |
| CA1520 | orf19.4801  | <i>IPF11035</i>    | 1.0  | 1.0  | -1.1 | -1.0 | YOR274W | <i>MOD5</i>   | 1.0 | -1.3 | -1.2 | -1.2 | similar to <i>Saccharomyces cerevisiae</i> Mod5p tRNA isopentenyltransferas     |
| CA1521 | orf19.4802  | <i>FTH1</i>        | 1.0  | 1.0  | -1.0 | 1.0  | YBR207W | <i>FTH1</i>   | 1.0 | -1.7 | -1.7 | -1.4 | iron transporter                                                                |
| CA1523 | orf19.3792  | <i>PAT1</i>        | -1.1 | 1.1  | 1.1  | 1.1  | YCR077C | <i>PAT1</i>   | 1.0 | -1.0 | -1.1 | 1.2  | Topoisomerase II-associated protein (by homology)                               |
| CA1524 | orf19.3794  | <i>SUR1</i>        | 1.0  | -1.0 | -1.0 | -1.1 | YJL056C | <i>ZAP1</i>   | 1.0 | -1.3 | -1.4 | -1.1 | Suppressor of ROK1                                                              |
| CA1525 | orf19.3795  | <i>AGP3</i>        | 1.0  | 1.7  | 2.8  | 2.0  | YFL055W | <i>AGP3</i>   | 1.0 | -1.5 | -1.8 | -2.5 | amino acid-permease (by homology)                                               |
| CA1529 | orf19.4557  | <i>SPC105</i>      | -1.1 | -1.0 | -1.1 | -1.0 | YGL093W | <i>SPC105</i> | 1.0 | -1.2 | -1.1 | -1.2 | Spindle pole body protein (by homology)                                         |
| CA1530 | orf19.1221  | <i>ALG2.5</i>      | -1.0 | 1.0  | 1.2  | 1.1  | YGL065C | <i>ALG2</i>   | 1.0 | -1.5 | -1.1 | -1.3 | mannosyltransferase, 5-prime end (by homology)                                  |
| CA1531 | orf19.1220  | <i>RVS167</i>      | 1.0  | -1.0 | 1.0  | 1.0  | YDR388W | <i>RVS167</i> | 1.0 | -1.8 | -1.5 | -1.4 | (putative) cytoskeletal protein (by homology)                                   |
| CA1532 | orf19.8806  | <i>IPF9507</i>     | -1.2 | -1.1 | -1.4 | -1.2 | YMR247C |               | 1.0 | -1.4 | -1.3 | -1.2 | unknown function                                                                |
| CA1534 | orf19.1214  | <i>MAP2</i>        | -1.1 | -1.0 | 1.1  | 1.0  | YBL091C | <i>MAP2</i>   | 1.0 | -1.1 | -1.2 | -1.2 | methionine aminopeptidase (by homology)                                         |
| CA1535 | orf19.8800  | <i>IPF9515</i>     | 1.2  | 1.0  | 1.2  | 1.0  | YER120W | <i>SCS2</i>   | 1.0 | 1.2  | 1.8  | 2.1  | similar to <i>Saccharomyces cerevisiae</i> Scs2p required for inositol metaboli |
| CA1536 | orf19.451   | <i>SOK1</i>        | 1.1  | 1.1  | 1.4  | 1.3  | YDR006C | <i>SOK1</i>   | 1.0 | 1.3  | 1.3  | 1.2  | high copy suppressor of a cyclic AMP-dependent protein kinase r                 |
| CA1539 | orf19.4560  | <i>BFR1</i>        | -1.5 | -1.7 | -2.1 | -1.7 | YOR198C | <i>BFR1</i>   | 1.0 | -1.2 | 1.0  | 1.1  | Similar to <i>Saccharomyces cerevisiae</i> Bfr1p involved in the maintenance r  |
| CA1540 | orf19.4563  | <i>IPF1047</i>     | 1.0  | -1.0 | 1.0  | -1.0 | YMR310C |               | 1.0 | -1.1 | 1.2  | 1.4  | unknown function                                                                |
| CA1541 | orf19.4565  | <i>BGL21</i>       | 1.3  | 1.0  | 1.2  | 1.1  | YGR282C | <i>BGL2</i>   | 1.0 | 1.1  | 1.3  | 1.8  | endo-beta-1,3-glucanase (by homology)                                           |
| CA1546 | orf19.8891  | <i>IPF6671</i>     | -1.0 | 1.0  | -1.0 | 1.0  | YLL005C | <i>SPO75</i>  | 1.0 | 1.1  | 1.0  | -1.1 | unknown function                                                                |
| CA1549 | orf19.4278  | <i>IPF8744</i>     | -1.2 | 1.1  | 1.1  | 1.0  | YKL005C |               | 1.0 | -1.0 | -1.2 | -1.1 | unknown function                                                                |
| CA1551 | orf19.4275  | <i>IPF8741.3F</i>  | -1.0 | -1.1 | -1.2 | -1.0 | YDR217C | <i>RAD9</i>   | 1.0 | -1.6 | -1.3 | -1.2 | unknown function, 3-prime end                                                   |
| CA1552 | orf19.4274  | <i>PUT1</i>        | -1.4 | -4.0 | -5.4 | -3.7 | YLR142W | <i>PUT1</i>   | 1.0 | -1.5 | -1.4 | -1.5 | proline oxidase (by homology)                                                   |

|        |             |                   |      |      |       |      |         |               |     |      |      |      |                                                                                    |
|--------|-------------|-------------------|------|------|-------|------|---------|---------------|-----|------|------|------|------------------------------------------------------------------------------------|
| CA1554 | orf19.1713  | <i>GEA2.3F</i>    | -1.8 | -1.2 | -1.6  | -1.2 | YEL022W | <i>GEA2</i>   | 1.0 | 1.0  | 1.1  | 1.1  | GTP/GDP exchange factor, 3-prime end (by homology)                                 |
| CA1556 | orf19.1711  | <i>END3</i>       | -1.1 | -1.1 | -1.0  | -1.0 | YNL084C | <i>END3</i>   | 1.0 | -1.1 | 1.4  | 1.5  | required for endocytosis and cytoskeletal organization (by homology)               |
| CA1560 | orf19.1706  | <i>MET18</i>      | -1.0 | -1.2 | -1.2  | -1.1 | YIL128W | <i>MET18</i>  | 1.0 | -1.0 | 1.3  | 1.4  | Involved in NER repair and RNA polymerase II transcription (by homology)           |
| CA1564 | orf19.1153  | <i>GAD1</i>       | 1.0  | 2.8  | 3.4   | 3.4  | YMR250W | <i>GAD1</i>   | 1.0 | 1.5  | 1.0  | -1.7 | Glutamate decarboxylase (by homology)                                              |
| CA1565 | orf19.1154  | <i>EGD1</i>       | 1.1  | -1.1 | -1.3  | -1.0 | YPL037C | <i>EGD1</i>   | 1.0 | 1.3  | 1.5  | 1.9  | GAL4 DNA-binding enhancer protein (by homology)                                    |
| CA1570 | orf19.1160  | <i>IPF7617</i>    | 1.4  | 1.7  | 1.9   | 1.9  | YHR181W |               | 1.0 | -1.3 | -1.2 | -1.1 | unknown function                                                                   |
| CA1572 | orf19.9221  | <i>POX4</i>       | -1.0 | -8.4 | -11.0 | -8.2 | YGL205W | <i>POX1</i>   | 1.0 | 1.0  | 1.1  | 1.1  | peroxisomal fatty acyl-CoA oxidase (by homology)                                   |
| CA1577 | orf19.12446 | <i>KNS1</i>       | 1.0  | 1.1  | 1.0   | -1.0 | YLL019C | <i>KNS1</i>   | 1.0 | -1.6 | -1.1 | -1.5 | Ser/thr protein kinase (by homology)                                               |
| CA1578 | orf19.4715  | <i>NUM11</i>      | -1.0 | 1.1  | -1.4  | -1.2 | YDR150W | <i>NUM1</i>   | 1.0 | -2.0 | -1.8 | -1.6 | nuclear migration protein (by homology)                                            |
| CA1579 | orf19.4716  | <i>GDH3</i>       | 1.0  | 6.8  | 11.1  | 7.4  | YOR375C | <i>GDH1</i>   | 1.0 | 1.4  | 2.5  | 1.9  | NADP-glutamate dehydrogenase (by homology)                                         |
| CA1580 | orf19.4718  | <i>TRP5</i>       | -1.0 | -1.0 | -1.1  | -1.1 | YGL026C | <i>TRP5</i>   | 1.0 | 1.1  | 1.9  | 2.6  | tryptophan synthase (by homology)                                                  |
| CA1581 | orf19.4719  | <i>WH41.3E0C</i>  | -1.1 | -1.1 | 1.0   | 1.0  | YGL027C | <i>CWH41</i>  | 1.0 | 1.1  | 1.2  | 1.1  | ER glucosidase I, 3-prime end (by homology)                                        |
| CA1582 | orf19.6028  | <i>CLN21</i>      | -1.0 | -1.0 | -1.1  | -1.0 | YMR199W | <i>CLN1</i>   | 1.0 | -2.4 | -2.8 | -2.2 | G1 cyclin (by homology)                                                            |
| CA1583 | orf19.6029  | <i>ROT1</i>       | -1.1 | -1.1 | 1.0   | -1.1 | YMR200W | <i>ROT1</i>   | 1.0 | 1.1  | 1.3  | 1.5  | Suppressor of TOR2 mutations (by homology)                                         |
| CA1585 | orf19.6031  | <i>VPS27</i>      | -1.1 | -1.0 | 1.1   | -1.0 | YNR006W | <i>VPS27</i>  | 1.0 | -1.3 | -1.4 | -1.3 | Vacuolar protein sorting (by homology)                                             |
| CA1586 | orf19.6032  | <i>ODC1</i>       | 1.1  | 1.1  | 1.2   | 1.1  | YKL184W | <i>SPE1</i>   | 1.0 | -1.1 | 1.1  | 1.3  | Ornithine decarboxylase                                                            |
| CA1587 | orf19.6033  | <i>CMP2</i>       | -1.2 | -1.2 | -1.5  | -1.3 | YML057W | <i>CMP2</i>   | 1.0 | 1.0  | 1.1  | 1.0  | Calcineurin B, catalytic subunit (by homology)                                     |
| CA1588 | orf19.11787 | <i>SPT8</i>       | -1.1 | -1.3 | -1.4  | -1.2 | YLR055C | <i>SPT8</i>   | 1.0 | -1.3 | 1.1  | 1.1  | transcriptional adaptor or co-activator (by homology)                              |
| CA1590 | orf19.11790 | <i>IPF14665</i>   | -1.0 | 1.1  | 1.0   | -1.0 | YFL027C | <i>GYP8</i>   | 1.0 | 1.1  | 1.3  | 1.3  | unknown function                                                                   |
| CA1592 | orf19.4317  | <i>IPF14662</i>   | 1.6  | -1.7 | -1.4  | -1.4 | YHR104W | <i>GRE3</i>   | 1.0 | 1.4  | 1.6  | 1.3  | D-xylose reductase (by homology)                                                   |
| CA1593 | orf19.4318  | <i>MIG1</i>       | -1.0 | 1.3  | 1.1   | 1.1  | YGL035C | <i>MIG1</i>   | 1.0 | -1.3 | 1.4  | 1.1  | transcriptional regulator                                                          |
| CA1595 | orf19.7905  | <i>IPF9544</i>    | 1.2  | 1.0  | 1.2   | 1.1  | YNL156C |               | 1.0 | 1.2  | 1.7  | 1.2  | unknown function                                                                   |
| CA1596 | orf19.272   | <i>FAA21</i>      | -1.2 | -3.0 | -3.8  | -2.7 | YER015W | <i>FAA2</i>   | 1.0 | 1.1  | 1.1  | 1.4  | long-chain-fatty-acid-CoA ligase (by homology)                                     |
| CA1598 | orf19.7901  | <i>SES1</i>       | -1.5 | -1.4 | -1.4  | -1.2 | YDR023W | <i>SES1</i>   | 1.0 | 1.2  | 1.4  | 1.4  | seryl-tRNA synthetase (by homology)                                                |
| CA1599 | orf19.7900  | <i>IPF11452</i>   | 1.0  | 1.0  | 1.0   | 1.0  | YDR030C | <i>RAD28</i>  | 1.0 | -1.1 | -1.1 | -1.1 | unknown function                                                                   |
| CA1600 | orf19.4720  | <i>CTR2</i>       | 1.1  | 1.2  | 1.2   | 1.1  | YHR175W | <i>CTR2</i>   | 1.0 | 1.1  | 1.3  | 1.3  | copper transport protein (by homology)                                             |
| CA1602 | orf19.4722  | <i>RTG1</i>       | 1.1  | 1.1  | 1.1   | 1.1  | YOL067C | <i>RTG1</i>   | 1.0 | -1.0 | 1.2  | 1.3  | basic helix-loop-helix transcription factor that regulates C1T2 gene               |
| CA1603 | orf19.4723  | <i>FAD1</i>       | 1.1  | 1.1  | 1.1   | 1.1  | YDL045C | <i>FAD1</i>   | 1.0 | 1.1  | -1.1 | -1.1 | flavin adenine dinucleotide (FAD) synthetase (by homology)                         |
| CA1604 | orf19.4724  | <i>IPF13653</i>   | -1.0 | 1.1  | -1.0  | -1.0 | YDL043C | <i>PRP11</i>  | 1.0 | -1.6 | 1.1  | -1.1 | unknown function                                                                   |
| CA1605 | orf19.4725  | <i>SWI6</i>       | -1.5 | -1.6 | -2.0  | -1.7 | YLR182W | <i>SWI6</i>   | 1.0 | -1.2 | 1.6  | 1.5  | Transcription factor (by homology)                                                 |
| CA1606 | orf19.4726  | <i>NCS1</i>       | 1.1  | 1.1  | 1.0   | 1.2  | YDR373W | <i>FRQ1</i>   | 1.0 | -1.0 | 1.3  | 1.2  | Calcium binding protein (by homology)                                              |
| CA1607 | orf19.4727  | <i>IPF14916</i>   | 1.2  | 1.1  | 1.1   | 1.1  | YOL071W |               | 1.0 | -1.7 | -1.5 | -1.6 | unknown function                                                                   |
| CA1608 | orf19.4122  | <i>TES12</i>      | 1.1  | -1.1 | -1.0  | -1.1 | YJR019C | <i>TES1</i>   | 1.0 | 1.2  | 1.0  | 1.1  | Thiosterase (by homology)                                                          |
| CA1610 | orf19.4120  | <i>LAS1</i>       | 1.0  | 1.1  | 1.1   | 1.0  | YKR063C | <i>LAS1</i>   | 1.0 | -1.1 | -1.1 | -1.2 | cell morphogenesis, cytoskeletal regulation and bud formation (by homology)        |
| CA1611 | orf19.4119  | <i>SPO72</i>      | 1.0  | 1.1  | -1.0  | 1.0  | YNL242W | <i>APG2</i>   | 1.0 | 1.1  | -1.3 | -1.7 | required for sporulation (by homology)                                             |
| CA1615 | orf19.3218  | <i>IPF14540</i>   | 1.0  | -1.0 | 1.0   | -1.0 | YJR124C |               | 1.0 | -2.3 | -1.0 | 1.1  | putative multidrug protein (by homology)                                           |
| CA1617 | orf19.3220  | <i>IPF14536</i>   | 1.0  | -1.0 | -1.0  | -1.1 | YDR339C |               | 1.0 | 1.4  | 1.5  | 1.7  | unknown function                                                                   |
| CA1618 | orf19.11559 | <i>RRP45</i>      | -1.0 | -1.2 | -1.0  | -1.0 | YDR280W | <i>RRP45</i>  | 1.0 | -1.2 | 1.1  | 1.0  | Protein component of the exosome 3-5 exoribonuclease complex (by homology)         |
| CA1619 | orf19.11558 | <i>IPF2067</i>    | 1.1  | -1.0 | 1.2   | 1.1  | YPL057C | <i>SUR1</i>   | 1.0 | -1.4 | 1.3  | -1.3 | Required for mannosylation of sphingolipids (by homology)                          |
| CA1620 | orf19.4076  | <i>MET10</i>      | -1.3 | -1.6 | -1.9  | -1.5 | YFR030W | <i>MET10</i>  | 1.0 | -1.1 | 1.2  | 1.1  | Sulfite reductase flavin-binding subunit (by homology)                             |
| CA1622 | orf19.470   | <i>IPF10045</i>   | -1.0 | -1.0 | -1.0  | -1.0 | YDR145W | <i>TAF61</i>  | 1.0 | 1.2  | 1.5  | 1.5  | similar to Saccharomyces cerevisiae Taf61p TFIID and SAGA subunit (by homology)    |
| CA1623 | orf19.469   | <i>STE7</i>       | -1.0 | -1.0 | -1.0  | -1.1 | YDL159W | <i>STE7</i>   | 1.0 | -1.1 | 1.1  | -1.1 | MAP Kinase Kinase                                                                  |
| CA1626 | orf19.1033  | <i>STR2</i>       | -1.1 | -1.0 | 1.1   | -1.0 | YJR130C | <i>STR2</i>   | 1.0 | -1.0 | -1.0 | 1.2  | O-succinylhomoserine (thiol)-lyase (by homology)                                   |
| CA1627 | orf19.1032  | <i>SKO1.3</i>     | 1.0  | -1.1 | -1.1  | -1.2 | YNL167C | <i>SKO1</i>   | 1.0 | -1.1 | 1.5  | 1.9  | Cre-binding bzip protein, 3-prime end (by homology)                                |
| CA1628 | orf19.1031  | <i>HMG1</i>       | 1.0  | -1.1 | -1.0  | -1.0 | YLR450W | <i>HMG2</i>   | 1.0 | -1.5 | -1.4 | -1.4 | 3-hydroxy-3-methylglutaryl-coenzyme A reductase 1 (by homology)                    |
| CA1629 | orf19.1030  | <i>NPI46</i>      | 1.1  | 1.2  | 1.2   | 1.1  | YLR449W | <i>FPR4</i>   | 1.0 | -1.0 | 1.1  | -1.1 | proline cis-trans isomerase (by homology)                                          |
| CA1630 | orf19.1029  | <i>RPP1</i>       | 1.1  | -1.0 | -1.0  | 1.0  | YHR062C | <i>RPP1</i>   | 1.0 | -1.2 | 1.2  | 1.1  | required for processing of tRNA and 35S rRNA (by homology)                         |
| CA1631 | orf19.1028  | <i>IPF19582</i>   | 1.0  | 1.0  | -1.0  | -1.0 | YNL230C | <i>ELA1</i>   | 1.0 | 1.0  | 1.0  | -1.1 | unknown function                                                                   |
| CA1632 | orf19.11420 | <i>IPF10181</i>   | 1.1  | 1.0  | 1.0   | 1.1  | YJR101W | <i>RSM26</i>  | 1.0 | 1.5  | -1.0 | 1.1  | similar to Saccharomyces cerevisiae Rsm26p protein of the small subunit            |
| CA1634 | orf19.11421 | <i>IPF10179</i>   | 1.1  | 1.0  | 1.0   | 1.1  | YJR088C |               | 1.0 | -1.2 | -1.0 | -1.0 | unknown function                                                                   |
| CA1635 | orf19.3941  | <i>URA7</i>       | -1.1 | 1.3  | 1.5   | 1.2  | YBL039C | <i>URA7</i>   | 1.0 | 1.4  | 2.2  | 2.7  | CTP synthase 1 (by homology)                                                       |
| CA1636 | orf19.3942  | <i>IPF20086</i>   | 1.0  | 1.1  | 1.1   | 1.0  | YJR102C | <i>VPS25</i>  | 1.0 | 1.1  | 1.3  | 1.1  | unknown function                                                                   |
| CA1637 |             | <i>RPL43A.3</i>   | 1.5  | 1.1  | 1.4   | 1.3  | YPR043W | <i>RPL43A</i> | 1.0 | 2.2  | 2.4  | 1.8  | ribosomal protein, 3-prime end (by homology)                                       |
| CA1638 | orf19.3944  | <i>GRR1</i>       | 1.0  | 1.2  | 1.2   | 1.1  | YJR090C | <i>GRR1</i>   | 1.0 | 1.2  | 1.4  | 1.9  | Required for glucose repression and for glucose and cation transport (by homology) |
| CA1641 | orf19.1731  | <i>NHP10.3F</i>   | 1.1  | 1.0  | -1.0  | 1.0  | YDL002C | <i>NHP10</i>  | 1.0 | 1.4  | 1.3  | 1.5  | unknown function, 3-prime end                                                      |
| CA1645 | orf19.1727  | <i>PMC1</i>       | -1.1 | -1.0 | -1.0  | -1.0 | YGL006W | <i>PMC1</i>   | 1.0 | -1.4 | -1.1 | 1.1  | Ca <sup>2+</sup> -transporting P-type ATPase (by homology)                         |
| CA1647 | orf19.5568  | <i>IPF16663</i>   | -1.1 | -1.1 | -1.1  | -1.1 | YKR020W |               | 1.0 | -1.3 | -1.2 | -1.2 | unknown function                                                                   |
| CA1648 | orf19.5567  | <i>IPF16662</i>   | 1.0  | 1.0  | 1.0   | 1.0  | YBR257W | <i>POP4</i>   | 1.0 | 1.1  | 1.2  | 1.0  | unknown function                                                                   |
| CA1649 | orf19.5566  | <i>LAB1</i>       | 1.0  | -1.1 | -1.0  | -1.0 | YJL046W |               | 1.0 | 1.0  | -1.1 | -1.1 | Lipoate biosynthesis by homology                                                   |
| CA1652 | orf19.5563  | <i>RNH1.EXON1</i> | 1.2  | -1.0 | -1.0  | -1.0 | YMR234W | <i>RNH1</i>   | 1.0 | -1.1 | 1.1  | -1.1 | Ribonuclease H, exon 1 (by homology)                                               |
| CA1653 | orf19.5561  | <i>STE23</i>      | -1.4 | 1.0  | -1.2  | 1.1  | YLR389C | <i>STE23</i>  | 1.0 | -1.3 | 1.1  | -1.2 | protease involved in a-factor processing by homology                               |

|        |             |                   |      |      |      |      |         |              |     |      |      |      |                                                                                 |
|--------|-------------|-------------------|------|------|------|------|---------|--------------|-----|------|------|------|---------------------------------------------------------------------------------|
| CA1654 | orf19.5559  | <i>IPF19660</i>   | -1.1 | 1.1  | 1.3  | 1.1  | YDR202C | <i>RAV2</i>  | 1.0 | 1.2  | 1.3  | 1.3  | unknown function                                                                |
| CA1655 | orf19.4328  | <i>CCC2</i>       | -1.1 | -1.2 | -1.2 | -1.1 | YDR270W | <i>CCC2</i>  | 1.0 | -1.2 | -1.1 | -1.0 | putative copper-transporting ATPase (by homology)                               |
| CA1656 | orf19.4326  | <i>IPF16019</i>   | 1.1  | 1.0  | -1.0 | 1.0  | YOR308C | <i>SNU66</i> | 1.0 | 1.0  | 1.0  | 1.0  | unknown function                                                                |
| CA1659 | orf19.4323  | <i>IPF11054</i>   | 1.0  | 1.0  | 1.1  | 1.0  | YHR105W |              | 1.0 | -1.4 | -1.1 | 1.0  | unknown function                                                                |
| CA1660 | orf19.4322  | <i>DAP2</i>       | -1.0 | -1.0 | 1.1  | 1.1  | YHR028C | <i>DAP2</i>  | 1.0 | -1.1 | -1.1 | -1.1 | dipeptidyl aminopeptidase B (by homology)                                       |
| CA1662 |             | <i>RPL28.3F</i>   | 1.3  | -1.0 | 1.1  | 1.2  | YGL103W | <i>RPL28</i> | 1.0 | 1.8  | 1.8  | 2.2  | Ribosomal protein, 3-prime end (by homology)                                    |
| CA1663 | orf19.2864  | <i>IPF7309</i>    | -1.1 | -1.0 | 1.0  | 1.0  | YGL101W |              | 1.0 | 1.1  | 1.1  | 1.3  | unknown function                                                                |
| CA1664 |             | <i>ERV1.3</i>     | 1.1  | 1.1  | 1.0  | 1.0  | YGR029W | <i>ERV1</i>  | 1.0 | -1.3 | -1.4 | -1.2 | Mitochondrial biogenesis and regulation of cell cycle, 3-prime end (by hom)     |
| CA1665 | orf19.2862  | <i>RIB1</i>       | 1.2  | -1.0 | 1.0  | -1.1 | YBL033C | <i>RIB1</i>  | 1.0 | -1.3 | -1.1 | -1.1 | GTP cyclohydrolase II by homology to <i>S.cerevisiae</i>                        |
| CA1666 | orf19.2859  | <i>SRP40</i>      | -1.2 | -1.3 | -1.2 | -1.1 | YKR092C | <i>SRP40</i> | 1.0 | 1.0  | 1.3  | 1.2  | RNA I and II supressor (by homology)                                            |
| CA1667 | orf19.2857  | <i>SSL2</i>       | -1.2 | -1.1 | -1.3 | -1.1 | YIL143C | <i>SSL2</i>  | 1.0 | 1.2  | 1.1  | 1.4  | by homology to <i>S. cerevisiae</i> : DNA helicase                              |
| CA1669 | orf19.2852  | <i>IPF11393</i>   | 1.3  | -1.0 | -1.2 | 1.1  | YBL090W | <i>MRP21</i> | 1.0 | 1.0  | -1.1 | -1.4 | unknown function                                                                |
| CA1673 | orf19.3612  | <i>PST2</i>       | 1.1  | 1.3  | 1.4  | 1.3  | YDR032C | <i>PST2</i>  | 1.0 | 1.1  | -1.2 | -1.8 | 1,4-benzoquinone reductase by homology                                          |
| CA1674 | orf19.3613  | <i>PAF1</i>       | -1.2 | -1.2 | -1.2 | -1.0 | YBR279W | <i>PAF1</i>  | 1.0 | -2.9 | -2.7 | -1.7 | DNA-directed RNA polymerase II regulator by homology                            |
| CA1675 | orf19.3615  | <i>IPF5192</i>    | 1.0  | 1.0  | 1.0  | 1.0  | YPL191C |              | 1.0 | -1.6 | 1.1  | 1.0  | unknown function                                                                |
| CA1676 | orf19.3616  | <i>ERG9</i>       | -1.4 | 1.0  | -1.0 | -1.1 | YHR190W | <i>ERG9</i>  | 1.0 | -1.1 | -1.0 | -1.0 | farnesyl-diphosphate farnesyltransferase                                        |
| CA1677 | orf19.3617  | <i>GTR1</i>       | 1.0  | 1.0  | 1.0  | 1.1  | YML121W | <i>GTR1</i>  | 1.0 | -1.1 | 1.1  | 1.1  | GTP-binding protein by homology                                                 |
| CA1678 | orf19.3618  | <i>IPF5185</i>    | 1.6  | 4.2  | 5.6  | 3.9  | YAR050W | <i>FLO1</i>  | 1.0 | -1.5 | -1.1 | -1.4 | putative cell wall protein (by homology)                                        |
| CA1680 | orf19.4913  | <i>IPF15649</i>   | -1.0 | -1.0 | -1.0 | -1.0 | YOL087C |              | 1.0 | -1.1 | 1.1  | 1.1  | unknown function                                                                |
| CA1686 | orf19.3659  | <i>IPF12272</i>   | -1.1 | 1.1  | 1.0  | -1.0 | YER139C |              | 1.0 | 1.1  | -1.1 | -1.2 | unknown function                                                                |
| CA1687 | orf19.3658  | <i>IPF12275</i>   | -1.1 | 1.1  | 1.2  | 1.1  | YER140W |              | 1.0 | -1.1 | -1.0 | -1.0 | unknown function                                                                |
| CA1688 | orf19.3656  | <i>COX15</i>      | -1.1 | 2.0  | 2.6  | 2.5  | YER141W | <i>COX15</i> | 1.0 | -1.4 | -1.4 | -1.6 | cytochrome oxidase assembly factor (by homology)                                |
| CA1690 | orf19.3653  | <i>FAT1</i>       | -1.1 | -1.0 | -1.1 | 1.0  | YBR041W | <i>FAT1</i>  | 1.0 | 1.3  | 1.2  | 1.2  | very long-chain fatty acyl-CoA synthetase (by homology)                         |
| CA1691 | orf19.3651  | <i>PGK1</i>       | 1.0  | 2.5  | 2.4  | 2.5  | YCR012W | <i>PGK1</i>  | 1.0 | 2.0  | 2.9  | 3.5  | Phosphoglycerate kinase                                                         |
| CA1692 | orf19.5036  | <i>F17055.3EO</i> | 1.1  | 1.0  | 1.0  | 1.0  | YDR425W |              | 1.0 | -2.0 | -1.6 | -1.5 | unknown function, 3-prime end                                                   |
| CA1694 | orf19.5038  | <i>TRM3</i>       | -1.1 | -1.2 | -1.2 | -1.1 | YDL112W | <i>TRM3</i>  | 1.0 | 1.3  | 1.0  | 1.2  | 2'-O-ribose methyltransferase (by homology)                                     |
| CA1695 | orf19.5039  | <i>RRP42</i>      | 1.0  | -1.1 | -1.1 | -1.0 | YDL111C | <i>RRP42</i> | 1.0 | 1.4  | 1.3  | 1.9  | rRNA processing protein (by homology)                                           |
| CA1696 | orf19.5040  | <i>ASM4</i>       | -1.1 | -1.1 | -1.1 | -1.0 | YDL088C | <i>ASM4</i>  | 1.0 | 1.2  | 1.3  | 1.2  | similar to <i>Saccharomyces cerevisiae</i> Asm4p suppressor of temperature-s    |
| CA1700 | orf19.5046  | <i>RAM1.5F</i>    | -1.1 | -1.1 | -1.2 | -1.1 | YDL090C | <i>RAM1</i>  | 1.0 | -1.0 | -1.0 | -1.1 | protein farnesyltransferase, beta subunit, 5-prime end (by homology)            |
| CA1702 | orf19.702   | <i>HEL1</i>       | -1.4 | -1.3 | -1.4 | -1.4 | YER176W | <i>ECM32</i> | 1.0 | 1.0  | 1.2  | 1.3  | DNA helicase I (by homology)                                                    |
| CA1703 | orf19.703   | <i>IPF7987</i>    | 1.0  | -1.1 | 1.0  | -1.0 | YGR247W |              | 1.0 | -1.3 | -1.2 | -1.5 | unknown function                                                                |
| CA1704 | orf19.704   | <i>SOL3</i>       | 1.1  | -1.2 | -1.3 | -1.0 | YHR163W | <i>SOL3</i>  | 1.0 | -1.4 | -1.2 | 1.1  | weak multicopy suppressor of <i>los1-1</i> (by homology)                        |
| CA1705 | orf19.705   | <i>GCN5</i>       | 1.1  | -1.1 | 1.0  | -1.3 | YGR252W | <i>GCN5</i>  | 1.0 | -1.8 | -1.1 | 1.0  | Histone acetyltransferase (by homology)                                         |
| CA1706 | orf19.706   | <i>NMD3</i>       | -1.0 | -1.0 | 1.1  | -1.1 | YHR170W | <i>NMD3</i>  | 1.0 | 1.1  | 1.3  | 1.7  | RNA binding (by homology)                                                       |
| CA1709 | orf19.4889  | <i>HOL2</i>       | 1.1  | -1.0 | 1.0  | 1.1  | YNR055C | <i>HOL1</i>  | 1.0 | 1.2  | 1.2  | 1.5  | Multidrug-resistance protein subfamily 1 (by homology)                          |
| CA1710 | orf19.4890  | <i>CLA4</i>       | -1.1 | -1.1 | -1.1 | -1.2 | YNL298W | <i>CLA4</i>  | 1.0 | 1.3  | 1.4  | 1.5  | protein kinase homologue (by homology)                                          |
| CA1712 | orf19.10842 | <i>ABC1</i>       | -1.1 | 1.0  | 1.1  | -1.1 | YGL119W | <i>ABC1</i>  | 1.0 | -1.2 | -1.2 | -1.3 | ubiquinol-cytochrome-c reductase (by homology)                                  |
| CA1713 | orf19.3332  | <i>IPF19743</i>   | 1.0  | -1.0 | 1.0  | -1.0 | YDL231C | <i>BRE4</i>  | 1.0 | -1.1 | -1.2 | -1.3 | unknown function                                                                |
| CA1714 | orf19.3333  | <i>NAB2</i>       | -1.2 | -1.1 | -1.2 | -1.1 | YGL122C | <i>NAB2</i>  | 1.0 | -1.1 | 1.1  | 1.6  | Nuclear poly(A)-RNA-binding protein (by homology)                               |
| CA1715 | orf19.3334  | <i>RPS21</i>      | 1.0  | 1.0  | -1.1 | 1.0  | YGL123W | <i>RPS2</i>  | 1.0 | 1.2  | 1.4  | 2.2  | ribosomal protein (by homology)                                                 |
| CA1719 | orf19.12119 | <i>ILV6</i>       | 1.1  | 1.0  | 1.1  | 1.1  | YCL009C | <i>ILV6</i>  | 1.0 | 1.1  | 1.4  | 2.1  | acetolactate synthase, regulatory subunit (by homology)                         |
| CA1723 | orf19.2651  | <i>TEF4</i>       | 1.0  | 1.1  | 1.1  | -1.0 | YPL048W | <i>CAM1</i>  | 1.0 | -1.1 | 1.1  | 1.0  | translation elongation factor eEF1 (by homology)                                |
| CA1728 | orf19.6494  | <i>WHI3</i>       | 1.1  | 1.1  | 1.2  | 1.1  | YNL197C | <i>WHI3</i>  | 1.0 | -2.0 | -2.0 | -1.5 | Putative RNA binding protein (by homology)                                      |
| CA1729 | orf19.6496  | <i>IPF8440</i>    | -1.0 | 1.1  | 1.0  | 1.1  | YOR115C | <i>TRS33</i> | 1.0 | -1.6 | -1.4 | -1.3 | similar to <i>Saccharomyces cerevisiae</i> Trs33p TRAPP subunit of 33 kDa in    |
| CA1730 | orf19.6498  | <i>IPF8439</i>    | 1.0  | 1.1  | 1.0  | 1.0  | YDL115C | <i>IWR1</i>  | 1.0 | -1.7 | -1.3 | -1.3 | unknown function                                                                |
| CA1732 | orf19.6500  | <i>ECM42</i>      | 1.0  | 1.0  | 1.1  | 1.0  | YMR062C | <i>ECM40</i> |     |      |      |      | Acetylmethionine acetyltransferase (by homology)                                |
| CA1735 | orf19.2528  | <i>IPF4986</i>    | -1.1 | -1.1 | -1.1 | -1.1 | YNL039W | <i>TFC5</i>  | 1.0 | -1.7 | -2.0 | -1.7 | similar to <i>Saccharomyces cerevisiae</i> Tfc5p TFIIB subunit, 90 kD (by hon   |
| CA1736 | orf19.2527  | <i>IPF4983</i>    | 1.0  | 1.0  | -1.1 | 1.0  | YNL035C |              | 1.0 | 1.0  | -1.0 | -1.0 | unknown function                                                                |
| CA1737 | orf19.2525  | <i>LYS12</i>      | -1.1 | 1.2  | 1.5  | 1.2  | YIL094C | <i>LYS12</i> | 1.0 | 1.4  | 1.9  | 1.9  | homo-isocitrate dehydrogenase (by homology)                                     |
| CA1738 | orf19.2524  | <i>MGE1</i>       | 1.1  | 1.0  | 1.1  | -1.0 | YOR232W | <i>MGE1</i>  | 1.0 | -1.0 | -1.3 | -1.3 | heat shock protein (by homology)                                                |
| CA1740 | orf19.5058  | <i>SMI1</i>       | -1.2 | -1.1 | -1.2 | -1.1 | YGR229C | <i>SMI1</i>  | 1.0 | -1.1 | 1.4  | 1.4  | beta-1,3-glucan synthesis protein (by homology)                                 |
| CA1742 | orf19.5054  | <i>IPF12210</i>   | -1.1 | -1.4 | -1.3 | -1.2 | YFR047C |              | 1.0 | -1.6 | -1.6 | -1.5 | quinolinate phosphoribosyltransferase (by homology)                             |
| CA1743 | orf19.5053  | <i>IPF12209</i>   | 1.0  | 1.1  | 1.0  | 1.1  | YFR027W | <i>ECO1</i>  | 1.0 | -1.2 | -1.2 | -1.1 | similar to <i>Saccharomyces cerevisiae</i> Eco1p involved in sister chromatid c |
| CA1744 | orf19.5052  | <i>IPF10889</i>   | 1.1  | 1.0  | 1.0  | -1.0 | YFR045W |              | 1.0 | 1.2  | 1.0  | -1.1 | unknown function                                                                |
| CA1746 | orf19.5050  | <i>IPF10886</i>   | -1.1 | -1.1 | -1.2 | -1.1 | YGL236C | <i>MTO1</i>  | 1.0 | -1.4 | -1.7 | -1.7 | unknown function                                                                |
| CA1747 | orf19.5049  | <i>IPF10884</i>   | -1.0 | -1.0 | 1.0  | 1.0  | YLR003C |              | 1.0 | -1.1 | 1.0  | 1.1  | unknown function                                                                |
| CA1751 | orf19.1517  | <i>ARO3.EXON2</i> | -1.1 | 1.1  | -1.0 | 1.0  | YDR035W | <i>ARO3</i>  | 1.0 | 1.4  | 1.9  | 2.9  | 3-deoxy-D-arabinoheptulosonate-7-phosphate synthase, exon 2 (by hom             |
| CA1752 | orf19.1516  | <i>UBP14</i>      | -1.2 | 1.1  | -1.0 | 1.1  | YBR058C | <i>UBP14</i> | 1.0 | -1.1 | -1.1 | -1.1 | Ubiquitin-specific protease (by homology)                                       |
| CA1753 | orf19.1515  | <i>IPF8245</i>    | -1.0 | 1.1  | 1.1  | 1.1  | YDR371W |              | 1.0 | -1.1 | 1.1  | -1.5 | putative chitinase                                                              |
| CA1754 | orf19.5131  | <i>IPF16320</i>   | -1.3 | -1.1 | -1.2 | -1.1 | YCL039W |              | 1.0 | -1.1 | -1.3 | -1.1 | Unknown function                                                                |
| CA1755 | orf19.5130  | <i>PDI1</i>       | -1.1 | -1.2 | -1.7 | -1.3 | YCL043C | <i>PDI1</i>  | 1.0 | -1.8 | -1.1 | 1.2  | protein disulfide-isomerase precursor (by homology)                             |



|        |            |             |      |      |      |      |         |        |     |      |      |      |                                                                           |
|--------|------------|-------------|------|------|------|------|---------|--------|-----|------|------|------|---------------------------------------------------------------------------|
| CA1758 | orf19.5126 | IPF14559.3F | -1.0 | -1.4 | -1.4 | -1.4 | YCL037C | SRO9   | 1.0 | 1.2  | 1.3  | 1.9  | unknown function, 3-prime end                                             |
| CA1759 | orf19.5125 | IPF14744    | -1.2 | -1.5 | -1.5 | -1.3 | YLR149C |        | 1.0 | 1.2  | 1.2  | -1.3 | unknown function                                                          |
| CA1762 |            | IPF20014    | 1.0  | -1.0 | -1.0 | -1.0 | YIR035C |        | 1.0 | -1.3 | 1.2  | 1.7  | oxidoreductase by homology                                                |
| CA1763 | orf19.5195 | URA6        | 1.1  | -1.2 | -1.3 | -1.2 | YKL024C | URA6   | 1.0 | 1.2  | 1.4  | 1.9  | Uridine-monophosphate kinase(by homology)                                 |
| CA1764 | orf19.5196 | IPF7596     | 1.2  | 1.2  | 1.1  | 1.2  | YJR017C | ESS1   | 1.0 | -1.5 | -1.1 | -1.1 | similar to Saccharomyces cerevisiae Ess1p peptidyl-prolyl cis/trans isom  |
| CA1765 | orf19.5197 | APE2        | -1.3 | -1.4 | -2.0 | -2.0 | YKL157W | APE2   | 1.0 | -1.3 | -1.2 | -1.2 | aminopeptidase yscII                                                      |
| CA1766 | orf19.5198 | NOP4        | -1.1 | -1.3 | -1.5 | -1.4 | YPL043W | NOP4   | 1.0 | 1.2  | 1.7  | 2.0  | Nucleolar protein                                                         |
| CA1767 | orf19.5200 | SIT4        | 1.1  | 1.3  | 1.6  | 1.4  | YDL047W | SIT4   | 1.0 | -1.0 | 1.1  | 1.2  | Ser/thr protein phosphatase                                               |
| CA1768 | orf19.5201 | IPF7585     | 1.1  | 1.0  | 1.0  | 1.1  | YER050C | RSM18  | 1.0 | 1.1  | 1.2  | 1.0  | unknown function                                                          |
| CA1770 | orf19.2185 | IPF12457    | 1.1  | -1.2 | 1.0  | -1.1 | YGL111W |        | 1.0 | 1.1  | 1.2  | 1.4  | unknown function                                                          |
| CA1771 | orf19.2186 | SEH1        | 1.0  | 1.0  | 1.1  | 1.1  | YGL100W | SEH1   | 1.0 | 1.1  | -1.1 | 1.1  | nuclear pore protein (by homology)                                        |
| CA1772 | orf19.2187 | ALG7        | 1.3  | 1.5  | 2.1  | 1.6  | YBR243C | ALG7   | 1.0 | 1.1  | 1.2  | 1.1  | UDP-N-acetylglucosamine-1-phosphate transferase (by homology)             |
| CA1773 | orf19.2190 | VRP1        | 1.1  | 1.2  | 1.3  | 1.1  | YLR337C | VRP1   | 1.0 | -1.1 | -1.1 | -1.0 | verprolin (by homology)                                                   |
| CA1774 | orf19.2191 | IPF7498     | 1.1  | -1.0 | -1.0 | 1.0  | YBR246W |        | 1.0 | -1.2 | -1.2 | -1.1 | unknown function                                                          |
| CA1775 | orf19.9738 | GDH2        | 1.1  | -2.9 | -3.1 | -2.8 | YDL215C | GDH2   | 1.0 | -1.9 | -1.6 | -1.1 | NAD-specific glutamate dehydrogenase (NAD) (by homology)                  |
| CA1779 | orf19.1826 | IPF14510    | -1.0 | -1.2 | -1.1 | -1.1 | YGL219C | MMM2   | 1.0 | 1.1  | 1.2  | 1.1  | unknown function                                                          |
| CA1781 | orf19.1828 | IPF14508    | 1.0  | -1.0 | -1.0 | -1.0 | YEL029C | BUD16  | 1.0 | -1.1 | -1.1 | 1.1  | unknown function                                                          |
| CA1782 | orf19.1172 | PHO84.3E0C  | -1.1 | 1.4  | 1.4  | 1.7  | YML123C | PHO84  | 1.0 | -1.1 | 1.7  | 3.0  | Inorganic phosphate transport protein, 3-prime end (by homology)          |
| CA1784 | orf19.1170 | ARO7        | -1.0 | -1.2 | -1.1 | -1.1 | YPR060C | ARO7   | 1.0 | -1.4 | -1.1 | -1.0 | chorismate mutase (by homology)                                           |
| CA1785 | orf19.1169 | IPF7631     | 1.1  | 1.0  | 1.0  | 1.0  | YPR061C |        | 1.0 | -1.0 | 1.1  | 1.3  | unknown function                                                          |
| CA1787 | orf19.1167 | IFH3        | 1.0  | -1.0 | -1.0 | -1.0 | YLL057C |        | 1.0 | -1.5 | -1.8 | -2.2 | Dioxygenase (by homology)                                                 |
| CA1788 | orf19.1166 | USO1.3      | 1.2  | 1.2  | 1.1  | -1.0 | YBL047C | EDE1   | 1.0 | 1.4  | 1.3  | 1.2  | Cytoskeletal-related transport protein, Ca++ binding, 3-prime end (by ho  |
| CA1789 | orf19.1164 | GAR1        | 1.3  | 1.5  | 1.4  | 1.5  | YHR089C | GAR1   | 1.0 | -1.1 | 1.1  | 1.3  | Nucleolar rRNA processing protein (by homology)                           |
| CA1790 | orf19.5204 | IPF13971    | 1.1  | 1.2  | 1.6  | 1.2  | YNL042W | BOP3   | 1.0 | -1.1 | -1.1 | 1.0  | unknown function                                                          |
| CA1792 | orf19.5206 | IPF13966    | -1.1 | -1.2 | -1.1 | -1.1 | YIL104C |        | 1.0 | -1.2 | 1.3  | 1.2  | unknown function                                                          |
| CA1794 | orf19.5208 | IPF18608.3F | -1.0 | -1.0 | -1.0 | -1.0 | YIL103W |        | 1.0 | 1.0  | 1.2  | 1.1  | unknown function, 3-prime end                                             |
| CA1795 | orf19.5209 | IPF11261    | -1.1 | -1.0 | 1.0  | 1.0  | YNL041C | TFI2   | 1.0 | -1.2 | -1.1 | -1.2 | unknown function                                                          |
| CA1796 | orf19.5210 | IPF11259    | -1.0 | -1.0 | 1.0  | -1.1 | YIL101C | XBP1   | 1.0 | 1.2  | -1.0 | -1.2 | unknown function                                                          |
| CA1800 | orf19.2921 | IPF11445    | -1.0 | 1.0  | -1.0 | 1.0  | YER007W | PAC2   | 1.0 | -1.1 | -1.0 | -1.1 | similar to Saccharomyces cerevisiae Pac2p involved in the stabilization c |
| CA1802 | orf19.2919 | IPF11443    | -1.0 | 1.0  | -1.0 | 1.2  | YIR002C | MPH1   | 1.0 | -1.5 | -1.3 | -1.5 | unknown function                                                          |
| CA1803 | orf19.2917 | IPF16748    | -1.1 | -1.1 | -1.2 | -1.2 | YER006W |        | 1.0 | 1.6  | 2.5  | 3.4  | unknown function                                                          |
| CA1804 | orf19.1111 | TAF17       | 1.1  | 1.0  | -1.0 | -1.0 | YMR236W | TAF17  | 1.0 | -1.2 | -1.0 | -1.0 | TFIID and SAGA subunit (by homology)                                      |
| CA1805 | orf19.1112 | IPF6332     | -1.2 | -1.1 | -1.1 | -1.1 | YOR299W | BUD7   | 1.0 | -1.7 | -1.3 | 1.2  | similar to Saccharomyces cerevisiae Bud7p chitin biosynthesis protein in  |
| CA1807 | orf19.1114 | IPF6328     | 1.1  | 1.0  | -1.0 | 1.0  | YML030W |        | 1.0 | -1.1 | -1.2 | -1.4 | unknown function                                                          |
| CA1808 | orf19.1115 | GUK1        | -1.1 | -1.1 | -1.0 | -1.0 | YDR454C | GUK1   | 1.0 | 1.7  | 2.0  | 2.6  | Guanylate kinase (by homology)                                            |
| CA1811 | orf19.1119 | MTR10       | 1.0  | -1.0 | -1.1 | -1.0 | YOR160W | MTR10  | 1.0 | 1.0  | 1.2  | 1.5  | Involved in nuclear protein import                                        |
| CA1815 | orf19.138  | IPF18606    | -1.0 | 1.1  | 1.1  | 1.1  | YBR040W | FIG1   | 1.0 | 1.1  | 1.1  | 1.1  | unknown function                                                          |
| CA1816 | orf19.136  | IPF7020     | 1.0  | 1.1  | 1.3  | 1.1  | YBR043C |        | 1.0 | 1.2  | 1.2  | 1.2  | unknown function                                                          |
| CA1817 | orf19.135  | IPF7021     | -1.2 | -1.1 | -1.2 | -1.0 | YBR102C | EXO84  | 1.0 | -1.1 | -1.0 | -1.1 | similar to Saccharomyces cerevisiae Exo84p exocyst protein essential fo   |
| CA1819 | orf19.4273 | IPF16549    | -1.0 | -1.0 | 1.0  | -1.0 | YLR139C | SLS1   | 1.0 | -1.3 | -1.0 | 1.1  | Unknown function                                                          |
| CA1822 | orf19.4268 | IPF9525     | -1.3 | -1.4 | -1.5 | -1.2 | YLR222C |        | 1.0 | 1.2  | 1.2  | 1.6  | unknown function                                                          |
| CA1826 | orf19.4265 | UAP1        | -1.2 | -1.0 | -1.1 | 1.0  | YDL103C | QRI1   | 1.0 | -1.1 | 1.0  | 1.1  | UDP-N-acetylglucosamine pyrophosphorylase                                 |
| CA1829 | orf19.5184 | IPF17177.3F | 1.1  | 1.1  | 1.1  | 1.0  | YGL097W | SRM1   | 1.0 | -1.8 | -1.1 | 1.1  | similar to Saccharomyces cerevisiae Srm1p regulator of chromosome co      |
| CA1831 | orf19.5188 | CHS1        | 1.0  | 1.0  | 1.2  | 1.0  | YBR038W | CHS2   | 1.0 | 1.1  | 1.1  | 1.2  | Chitin synthase (by homology)                                             |
| CA1834 | orf19.3967 | PFK1        | -1.2 | 6.9  | 6.1  | 6.6  | YGR240C | PFK1   | 1.0 | -1.9 | -1.1 | 1.5  | 6-phosphofructokinase, alpha subunit                                      |
| CA1837 | orf19.3964 | IPF5776     | 1.1  | 1.2  | 1.3  | 1.2  | YLR015W | BRE2   | 1.0 | 1.0  | -1.1 | 1.1  | ash2-trithorax family protein (by homology)                               |
| CA1838 | orf19.3963 | IPF5777     | 1.1  | 1.1  | 1.1  | -1.0 | YER182W |        | 1.0 | -1.2 | -1.3 | -1.6 | unknown function                                                          |
| CA1839 | orf19.4711 | IPF4435     | -1.2 | -1.2 | -1.1 | -1.1 | YGR196C | FYV8   | 1.0 | -1.0 | -1.1 | -1.0 | unknown function                                                          |
| CA1841 | orf19.4705 | CCA1        | -1.0 | 1.0  | 1.1  | 1.0  | YER168C | CCA1   | 1.0 | 1.1  | 1.3  | 1.2  | tRNA nucleotidyltransferase (by homology)                                 |
| CA1842 | orf19.4704 | ARO1        | 1.1  | -1.1 | -1.0 | -1.2 | YDR127W | ARO1   | 1.0 | -1.7 | -1.9 | -1.5 | arom pentafunctional enzyme (by homology)                                 |
| CA1845 | orf19.637  | IPF11123    | 1.1  | -1.1 | -1.1 | -1.1 | YLL041C | SDH2   | 1.0 | -1.1 | -1.3 | -2.7 | similar to Saccharomyces cerevisiae Sdh2p succinate dehydrogenase irc     |
| CA1846 | orf19.638  | FDH12       | -1.1 | -1.2 | -1.5 | -1.2 | YOR388C | FDH1   | 1.0 | -1.1 | -1.1 | 1.1  | Formate dehydrogenase (by homology)                                       |
| CA1848 |            | IPF11128    | 1.0  | 1.0  | 1.0  | -1.0 | YMR225C | MRPL44 |     |      |      |      | unknown function                                                          |
| CA1850 | orf19.641  | IPF14630    | 1.0  | -1.0 | -1.1 | -1.0 | YFR041C |        | 1.0 | 1.0  | 1.0  | -1.4 | unknown function                                                          |
| CA1854 | orf19.649  | IPF12611    | -1.0 | 1.0  | 1.0  | -1.1 | YGL228W | SHE10  | 1.0 | -1.2 | 1.2  | 1.4  | unknown function                                                          |
| CA1855 | orf19.646  | GLN1        | -1.5 | 1.7  | 1.5  | 1.8  | YPR035W | GLN1   | 1.0 | 1.1  | 1.6  | 4.3  | glutamate-ammonia ligase (by homology)                                    |
| CA1860 | orf19.9072 | UTR4        | -1.0 | 1.0  | 1.1  | 1.1  | YEL038W | UTR4   | 1.0 | 1.4  | 1.5  | 1.3  | unknown function                                                          |
| CA1861 | orf19.866  | RAD32       | 1.0  | 1.2  | 1.2  | 1.2  | YDR419W | RAD30  | 1.0 | -1.0 | -1.2 | 1.0  | DNA repair protein (by homology)                                          |
| CA1862 | orf19.864  | NMD2        | -1.0 | 1.0  | -1.1 | -1.0 | YHR077C | NMD2   | 1.0 | -1.2 | -1.2 | 1.1  | Nonsense-mediated mRNA decay protein 2 (by homology)                      |
| CA1863 | orf19.863  | MRPL35      | -1.2 | -1.3 | -1.4 | -1.1 | YDR322W | MRPL35 | 1.0 | -1.1 | -1.1 | 1.1  | Ribosomal protein of the large subunit, mitochondrial (by homology)       |
| CA1868 | orf19.9992 | F14501.3E0  | -1.0 | 1.0  | -1.1 | 1.1  | YBR281C |        | 1.0 | -1.6 | -1.7 | -1.4 | putative G-protein, -transducin type, 3-prime end (by homology)           |

|        |             |             |      |      |      |      |         |        |     |      |      |      |                                                                            |
|--------|-------------|-------------|------|------|------|------|---------|--------|-----|------|------|------|----------------------------------------------------------------------------|
| CA1871 | orf19.9995  | F16981.EXO1 | -1.2 | -1.2 | -1.3 | -1.1 | YMR140W |        | 1.0 | 1.0  | 1.1  | -1.3 | unknown function, exon 1                                                   |
| CA1874 | orf19.2277  | TPK2        | 1.1  | 1.5  | 1.7  | 1.5  | YPL203W | TPK2   | 1.0 | 1.1  | 1.3  | -1.1 | cAMP-dependent protein kinase 2 (by homology)                              |
| CA1875 | orf19.2276  | RPB9        | 1.1  | 1.1  | 1.4  | 1.1  | YGL070C | RPB9   | 1.0 | 1.0  | 1.1  | 1.2  | DNA-directed RNA polymerase II (by homology)                               |
| CA1876 | orf19.2275  | IPF10301    | -1.1 | -1.2 | -1.2 | 1.0  | YGL068W |        | 1.0 | -1.1 | -1.5 | -1.8 | putative 60S ribosomal protein L7/L12 homolog, mitochondrial precursor     |
| CA1878 | orf19.2272  | IPF10298    | -1.1 | 1.1  | -1.1 | -1.0 | YPL202C | AFT2   | 1.0 | -1.0 | 1.3  | 1.3  | unknown function                                                           |
| CA1879 | orf19.2270  | SMF12       | -1.1 | -1.5 | -1.5 | -1.4 | YOL122C | SMF1   | 1.0 | -2.1 | -1.9 | -1.7 | manganese transporter (by homology)                                        |
| CA1880 | orf19.2269  | IPF13316    | 1.1  | 1.3  | 1.4  | 1.2  | YNL010W |        | 1.0 | 1.3  | 1.1  | 1.9  | unknown function                                                           |
| CA1881 | orf19.9808  | RCK2        | -1.1 | -1.1 | -1.1 | -1.0 | YLR248W | RCK2   | 1.0 | 1.0  | 1.4  | 1.1  | Ca/calmodulin-dependent ser/thr protein kinase (by homology)               |
| CA1883 | orf19.2209  | IPF5479     | -1.0 | 1.2  | 1.4  | 1.3  | YOR088W |        | 1.0 | 1.5  | 1.4  | 1.5  | unknown function                                                           |
| CA1887 | orf19.2204  | IPF5496     | 1.2  | 1.1  | 1.3  | 1.1  | YPL264C |        | 1.0 | -1.1 | -1.2 | -1.2 | unknown function                                                           |
| CA1889 |             | CBP6        | 1.1  | 1.1  | 1.1  | 1.1  | YBR120C | CBP6   | 1.0 | -1.2 | -1.4 | -1.4 | Apo-cytochrome B pre-mRNA processing protein (by homology)                 |
| CA1891 | orf19.2752  | IPF10196    | -1.3 | -2.4 | -2.7 | -2.2 | YDR216W | ADR1   | 1.0 | -1.7 | -1.7 | -2.1 | unknown function                                                           |
| CA1893 | orf19.2754  | TIM13       | 1.0  | 1.1  | 1.1  | 1.1  | YGR181W | TIM13  | 1.0 | -2.1 | -1.8 | -1.7 | subunit of mitochondrial protein import machinery-like by homology         |
| CA1894 | orf19.2755  | PRE7.EXON1  | 1.0  | 1.1  | 1.2  | 1.1  | YBL041W | PRE7   | 1.0 | 1.0  | 1.1  | 1.1  | putative subunit of 20S proteasome, exon 1 (by homology)                   |
| CA1896 | orf19.2756  | ERD2        | 1.1  | 1.3  | 1.4  | 1.3  | YBL040C | ERD2   | 1.0 | -1.0 | -1.1 | -1.1 | ER lumen protein retaining receptor (by homology)                          |
| CA1899 | orf19.2606  | HDA1        | -1.1 | -1.0 | -1.2 | -1.1 | YNL021W | HDA1   | 1.0 | -1.2 | -1.3 | -1.2 | Histone deacetylase (by homology)                                          |
| CA1901 | orf19.2604  | IPF14135    | -1.0 | -1.0 | -1.1 | -1.0 | YNL022C |        | 1.0 | -1.3 | -1.1 | -1.1 | unknown function                                                           |
| CA1902 | orf19.2602  | OPT1        | -1.0 | 1.1  | 1.1  | 1.1  | YJL212C | OPT1   | 1.0 | -1.1 | 1.0  | 1.2  | oligopeptide transporter                                                   |
| CA1904 | orf19.10298 | GRX5        | 1.2  | -1.0 | 1.0  | 1.2  | YPL059W | GRX5   | 1.0 | -1.4 | -1.7 | -2.1 | Glutaredoxin                                                               |
| CA1907 | orf19.2785  | ATP7        | 1.2  | -1.1 | 1.1  | 1.2  | YKL016C | ATP7   | 1.0 | 1.2  | 1.2  | -1.6 | F1F0-ATPase complex, FO D subunit (by homology)                            |
| CA1908 | orf19.2786  | APL3        | -1.2 | -1.1 | -1.1 | 1.0  | YBL037W | APL3   | 1.0 | 1.5  | 1.5  | 1.5  | AP-2 complex subunit, alpha-adaptin (by homology)                          |
| CA1910 | orf19.10306 | IPF7260     | -1.1 | -1.1 | -1.1 | -1.1 | YKL018W | SWD2   | 1.0 | -2.2 | -1.9 | -2.1 | unknown function                                                           |
| CA1911 | orf19.2435  | SSE1        | -1.5 | -1.5 | -1.7 | -1.5 | YPL106C | SSE1   | 1.0 | 1.2  | 2.0  | 2.8  | heat shock protein of HSP70 family (by homology)                           |
| CA1912 | orf19.2436  | SKY1        | -1.1 | -1.2 | -1.1 | -1.1 | YMR216C | SKY1   | 1.0 | -1.0 | 1.7  | 1.7  | SRPK1 like protein kinase (by homology)                                    |
| CA1913 | orf19.2437  | ARC35       | -1.2 | -1.0 | -1.1 | 1.1  | YNR035C | ARC35  | 1.0 | -1.0 | 1.1  | 1.1  | subunit of the Arp2/3 complex involved in the control of actin polymerizat |
| CA1914 | orf19.2438  | IPF16564    | 1.4  | 1.4  | 1.3  | 1.4  | YNR036C |        | 1.0 | 1.0  | 1.0  | -1.4 | putative mitochondrial ribosomal protein S12                               |
| CA1916 |             | IPF16566.3  | 1.1  | 1.0  | 1.0  | 1.0  | YHR001W | OSH7   | 1.0 | -1.5 | -1.5 | -1.1 | unknown function, 3-prime end                                              |
| CA1920 | orf19.2443  | IPF7476     | -1.2 | -1.2 | 1.1  | 1.0  | YBR260C | RGD1   | 1.0 | -1.1 | -1.1 | -1.2 | similar to Saccharomyces cerevisiae Rgd1p putative GTPase activating p     |
| CA1921 | orf19.2444  | IPF7475     | 1.2  | -1.0 | 1.2  | -1.1 | YHR142W | CHS7   | 1.0 | 1.0  | 1.2  | 1.1  | similar to Saccharomyces cerevisiae Chs7p involved in control of protein   |
| CA1924 | orf19.5537  | IPF9126     | 1.2  | 1.1  | 1.1  | -1.0 | YOL105C | WSC3   | 1.0 | 1.3  | 1.6  | 2.0  | unknown function                                                           |
| CA1927 | orf19.754   | YBN5        | -1.0 | -1.1 | -1.1 | -1.1 | YBR025C |        | 1.0 | -1.3 | 1.4  | 1.5  | Putative purine nucleotide-binding protein (by homology)                   |
| CA1928 | orf19.755   | MRPL37      | 1.0  | 1.0  | 1.0  | 1.0  | YBR268W | MRPL37 | 1.0 | -1.0 | -1.0 | -1.3 | Mitochondrial ribosomal protein YmL37 (by homology)                        |
| CA1930 | orf19.758   | IPF3906.3   | -1.0 | 1.0  | 1.0  | 1.0  | YPR079W | MRL1   | 1.0 | -1.1 | -1.1 | 1.0  | unknown function, 3-prime end                                              |
| CA1931 | orf19.759   | IPF3905     | -1.3 | 1.0  | -1.2 | -1.0 | YNL287W | SEC21  | 1.0 | -1.1 | 1.2  | 1.1  | similar to Saccharomyces cerevisiae Sec21p coatomer complex gamma          |
| CA1935 | orf19.4185  | IPF19936    | 1.0  | 1.2  | 1.3  | 1.2  | YGR203W |        | 1.0 | -1.2 | 1.0  | -1.0 | unknown function                                                           |
| CA1936 | orf19.4186  | PCT1        | -1.2 | 1.0  | -1.0 | 1.0  | YGR202C | PCT1   | 1.0 | -1.5 | -1.5 | -2.1 | cholinephosphate cytidyltransferase (by homology)                          |
| CA1937 | orf19.4187  | MMM1        | 1.0  | -1.0 | -1.1 | -1.0 | YLL006W | MMM1   | 1.0 | 1.1  | -1.0 | -1.2 | mitochondrial outer membrane protein (by homology)                         |
| CA1938 | orf19.4188  | NMD5        | -1.5 | -1.3 | -1.3 | -1.3 | YJR132W | NMD5   | 1.0 | -1.3 | -1.2 | -1.6 | putative Nam7p/Upf1p-interacting protein (by homology)                     |
| CA1940 | orf19.4190  | IPF7999     | 1.2  | 1.1  | 1.3  | 1.0  | YLR008C |        | 1.0 | -1.4 | -1.6 | -1.5 | unknown function                                                           |
| CA1941 | orf19.4191  | IPF7998     | -1.0 | -1.0 | -1.0 | 1.0  | YLR009W |        | 1.0 | -2.2 | -1.5 | -1.3 | Ribosomal protein L24 (by homology)                                        |
| CA1944 | orf19.4738  | IPF10645    | 1.2  | 1.1  | 1.1  | 1.1  | YPR154W |        | 1.0 | 1.3  | 1.9  | 1.5  | unknown function                                                           |
| CA1945 | orf19.4739  | MSS116      | -1.0 | -1.1 | -1.0 | -1.0 | YDR194C | MSS116 | 1.0 | -1.7 | -1.7 | -1.4 | RNA helicase of the DEAD box family (by homology)                          |
| CA1946 | orf19.4740  | IPF19937    | -1.1 | 1.0  | -1.0 | -1.0 | YHR189W |        | 1.0 | 1.1  | 1.0  | 1.1  | putative peptidyl-tRNA hydrolases (by homology)                            |
| CA1949 | orf19.12206 | IPF14021    | 1.0  | 1.0  | -1.0 | 1.0  | YJR110W |        | 1.0 | -2.1 | -2.0 | -2.0 | dual specificity phosphatase (PTP/DSP) (by homology)                       |
| CA1950 | orf19.12208 | IPF14019    | 1.0  | -1.3 | -1.3 | -1.1 | YPR169W |        | 1.0 | -1.1 | 1.3  | 1.4  | unknown function                                                           |
| CA1951 | orf19.12209 | HEM14       | 1.1  | -1.0 | 1.0  | 1.0  | YER014W | HEM14  | 1.0 | -1.2 | -1.1 | -1.1 | Mitochondrial protoporphyrinogen oxidase (by                               |
| CA1953 | orf19.763   | IPF3899     | 1.1  | 1.0  | 1.0  | 1.0  | YPL178W | CBC2   | 1.0 | 1.1  | 1.1  | 1.1  | similar to Saccharomyces cerevisiae Cbc2p small subunit of the nuclear     |
| CA1954 | orf19.764   | IPF3897.5F  | -1.3 | -1.1 | -1.7 | -1.4 | YGL083W | SCY1   | 1.0 | -1.4 | -1.2 | -1.2 | unknown function, 5-prime end                                              |
| CA1956 | orf19.767   | ERG3        | 1.4  | 1.4  | 1.6  | 1.5  | YLR056W | ERG3   | 1.0 | -1.1 | 1.8  | 2.0  | C5,6 desaturase                                                            |
| CA1957 | orf19.768   | IPF3887     | 1.0  | 1.4  | 2.4  | 1.6  | YIL047C | SYG1   | 1.0 | -1.1 | -1.0 | 1.6  | similar to Saccharomyces cerevisiae Syg1p plasma membrane protein of       |
| CA1958 | orf19.769   | IFE1        | 1.0  | 1.1  | -1.0 | 1.0  | YAL061W |        | 1.0 | 1.1  | -1.3 | -1.7 | Unknown function                                                           |
| CA1959 | orf19.771   | IFD2        | 1.0  | 1.1  | 1.1  | 1.0  | YPL088W |        | 1.0 | 1.2  | 1.3  | 1.3  | putative oxidoreductase (by homology)                                      |
| CA1960 | orf19.2400  | IPF15232    | 1.0  | 1.0  | -1.0 | 1.0  | YNL224C |        | 1.0 | -1.0 | -1.2 | -1.1 | unknown function                                                           |
| CA1961 | orf19.2399  | IPF14284    | -1.1 | -1.1 | -1.1 | -1.1 | YNL227C |        | 1.0 | 1.3  | 1.3  | 1.2  | putative dnaJ-like protein (by homology)                                   |
| CA1965 | orf19.2395  | IPF14035    | -1.1 | 1.0  | -1.0 | 1.0  | YJL106W | IME2   | 1.0 | 1.0  | -1.2 | -1.1 | Similar to serine/threonine protein kinase (by homology)                   |
| CA1966 | orf19.2394  | IFR4        | 1.0  | 1.0  | 1.1  | 1.0  | YNL134C |        | 1.0 | 1.0  | -1.1 | -1.8 | unknown function                                                           |
| CA1967 | orf19.5219  | IPF10866    | 1.0  | 1.1  | 1.2  | -1.0 | YOL081W | IRA2   | 1.0 | -1.2 | -1.4 | -1.1 | similar to Saccharomyces cerevisiae Ira2p GTPase-activating protein for    |
| CA1968 | orf19.5220  | IPF10864    | -1.1 | 1.0  | 1.1  | -1.0 | YOL080C | REX4   | 1.0 | 1.2  | 1.0  | 1.3  | similar to Saccharomyces cerevisiae REX4p member of the 3-prime to 5-pr    |
| CA1969 | orf19.5221  | IPF18579.3F | -1.0 | 1.0  | -1.0 | -1.2 | YOL078W |        | 1.0 | -1.4 | -1.4 | -1.3 | unknown function, 3-prime end                                              |
| CA1971 | orf19.5224  | PKH2        | 1.0  | 1.0  | -1.0 | -1.1 | YOL100W | PKH2   | 1.0 | -1.2 | -1.0 | -1.1 | Ser/Thr protein kinase (by homology)                                       |
| CA1972 |             | RPL27A      | 1.6  | 1.2  | 1.2  | 1.2  | YHR010W | RPL27A | 1.0 | 1.6  | 1.9  | 2.1  | ribosomal protein L27                                                      |



|        |             |          |      |      |      |      |          |        |     |      |      |      |                                                                          |
|--------|-------------|----------|------|------|------|------|----------|--------|-----|------|------|------|--------------------------------------------------------------------------|
| CA1973 | orf19.5226  | WRS1     | -1.2 | -1.3 | -1.5 | -1.3 | YOL097C  | WRS1   | 1.0 | -1.1 | 1.1  | 1.5  | tryptophan--tRNA ligase                                                  |
| CA1974 | orf19.5227  | IPF10410 | 1.2  | 2.1  | 2.7  | 1.9  | YLR021W  |        | 1.0 | -1.1 | 1.1  | 1.1  | unknown function                                                         |
| CA1976 | orf19.688   | IPF9582  | 1.1  | -1.1 | -1.2 | -1.0 | YNL306W  | MRPS18 | 1.0 | -1.3 | -1.5 | -1.7 | similar to Saccharomyces cerevisiae Mrps18p ribosomal protein of the sr  |
| CA1977 |             | RPL25.3  | 1.6  | 1.2  | 1.2  | 1.3  | YOL127W  | RPL25  | 1.0 | 1.4  | 1.5  | 1.9  | ribosomal protein L23a, 3-prime end (by homology)                        |
| CA1979 | orf19.686   | IPF9577  | -1.0 | 1.0  | -1.0 | 1.0  | YNL193W  |        | 1.0 | -1.1 | -1.1 | -1.2 | unknown function                                                         |
| CA1980 | orf19.685   | YHM1     | 1.1  | 1.2  | 1.2  | 1.2  | YDL198C  | YHM1   | 1.0 | -1.0 | -1.1 | 1.5  | member of the mitochondrial carrier family (MCF) (by homology)           |
| CA1981 | orf19.684   | IPF9470  | -1.1 | -1.0 | -1.1 | -1.0 | YDR228C  | PCF11  | 1.0 | -1.4 | -1.1 | -1.1 | similar to Saccharomyces cerevisiae Pcf11p component of pre-mRNA 3'      |
| CA1982 | orf19.683   | ADK1     | -1.0 | -1.4 | -1.7 | -1.5 | YDR226W  | ADK1   | 1.0 | 1.2  | 1.4  | 1.2  | adenylate kinase, cytosolic (by homology)                                |
| CA1983 | orf19.7733  | ILV5     | -1.4 | 1.1  | -1.1 | -1.0 | YLR355C  | ILV5   | 1.0 | -1.1 | 1.1  | 2.1  | ketol-acid reducto-isomerase (by homology)                               |
| CA1984 | orf19.7736  | IPF9592  | -1.1 | -1.1 | -1.1 | -1.1 | YFL042C  |        | 1.0 | -1.1 | 1.1  | 1.3  | unknown function                                                         |
| CA1985 | orf19.91    | IPF9591  | 1.0  | -1.0 | 1.0  | -1.0 | YGR053C  |        | 1.0 | -1.4 | -1.3 | -1.4 | unknown function                                                         |
| CA1986 | orf19.92    | IPF14899 | -1.1 | -1.2 | -1.4 | -1.2 | YFR016C  |        | 1.0 | 1.0  | -1.3 | -1.7 | unknown function                                                         |
| CA1987 | orf19.7739  | IPF14895 | 1.3  | -1.1 | -1.2 | -1.1 | YMR002W  |        | 1.0 | -1.8 | -1.7 | -1.8 | unknown function                                                         |
| CA1990 | orf19.7742  | TOP1     | 1.0  | -1.1 | -1.1 | -1.1 | YOL006C  | TOP1   | 1.0 | 1.2  | 1.2  | 1.5  | CANAL DNA TOPOISOMERASE I                                                |
| CA1994 | orf19.6481  | IPF6613  | -1.2 | -1.1 | -1.1 | -1.1 | YDR349C  | YPS7   | 1.0 | 1.1  | 1.2  | 1.4  | unknown function                                                         |
| CA1995 | orf19.6480  | IPF6612  | -1.2 | 1.0  | 1.1  | 1.0  | YML038C  | YMD8   | 1.0 | 1.0  | 1.0  | 1.1  | unknown function                                                         |
| CA1996 | orf19.6479  | SEC1     | 1.1  | 1.1  | 1.0  | 1.0  | YDR164C  | SEC1   | 1.0 | 1.0  | 1.3  | 1.1  | transport protein                                                        |
| CA1997 | orf19.6478  | YCF1     | -1.2 | 1.1  | 1.2  | 1.2  | YDR135C  | YCF1   | 1.0 | -1.3 | -1.1 | 1.0  | Glutathione S-conjugate transporter (by homology)                        |
| CA1998 | orf19.6477  | IPF6605  | -1.0 | -1.0 | -1.0 | -1.0 | YDR165W  |        | 1.0 | 1.1  | 1.6  | 1.6  | unknown function                                                         |
| CA1999 | orf19.13830 | IPF19513 | -1.1 | -1.1 | -1.0 | -1.1 | YLR114C  | EFR4   | 1.0 | 1.0  | 1.3  | 1.4  | unknown function                                                         |
| CA2001 | orf19.2792  | IPF17074 | -1.0 | 1.3  | 1.4  | 1.3  | YBR086C  | IST2   | 1.0 | 1.2  | 1.0  | -1.0 | unknown function                                                         |
| CA2002 | orf19.2794  | IPF16470 | 1.0  | 1.1  | 1.2  | 1.1  | YBL036C  |        | 1.0 | 1.3  | 1.4  | 1.8  | unknown function                                                         |
| CA2003 | orf19.2795  | IPF16471 | -1.2 | -1.4 | -1.5 | -1.2 | YDL051W  | LHP1   | 1.0 | 1.6  | 2.1  | 2.6  | unknown function                                                         |
| CA2004 | orf19.2796  | POL12    | -1.0 | -1.1 | -1.0 | -1.1 | YBL035C  | POL12  | 1.0 | 1.2  | 1.0  | -1.0 | DNA-directed DNA polymerase alpha (by homology)                          |
| CA2006 | orf19.2798  | IPF11801 | -1.2 | -1.1 | -1.2 | -1.0 | YDR332W  |        | 1.0 | -1.1 | 1.1  | 1.0  | unknown function                                                         |
| CA2007 | orf19.2799  | GPI8     | -1.1 | 1.1  | 1.1  | 1.2  | YDR331W  | GPI8   | 1.0 | -1.2 | 1.0  | 1.3  | essential for GPI anchor attachment (by homology)                        |
| CA2009 | orf19.3089  | IPF1732  | 1.3  | -1.4 | -1.4 | -1.5 | YLR168C  | MSF1'  | 1.0 | 1.5  | 1.7  | 1.8  | intramitochondrial protein sorting (by homology)                         |
| CA2010 | orf19.3088  | IPF1731  | 1.2  | 1.0  | 1.0  | -1.0 | YDR184C  | ATC1   | 1.0 | -1.0 | -1.1 | 1.2  | unknown function                                                         |
| CA2011 | orf19.3087  | RPS31    | 1.2  | 1.1  | -1.0 | 1.1  | YLR167W  | RPS31  | 1.0 | 2.1  | 2.4  | 2.3  | Ubiquitin fusion protein                                                 |
| CA2012 | orf19.3086  | SEC10    | -1.1 | -1.1 | -1.0 | -1.1 | YLR166C  | SEC10  | 1.0 | 1.0  | 1.0  | -1.0 | Required for exocytosis (by homology)                                    |
| CA2013 | orf19.3083  | CDC1     | -1.1 | 1.2  | 1.1  | 1.1  | YDR182W  | CDC1   | 1.0 | -1.3 | -1.1 | -1.2 | Cell division control protein (by homology)                              |
| CA2014 | orf19.10592 | IPF1717  | 1.0  | 1.1  | 1.1  | 1.0  | YDR180W  | SCC2   | 1.0 | 1.0  | -1.0 | -1.1 | similar to Saccharomyces cerevisiae Scc2p involved in sister chromatid c |
| CA2016 | orf19.8467  | IPF3415  | 1.0  | 1.9  | 2.6  | 1.6  | YMR152W  | YIM1   | 1.0 | 1.2  | 1.1  | -1.1 | similar to Saccharomyces cerevisiae Yim1p mitochondrial inner membran    |
| CA2017 | orf19.846   | IPF3414  | -1.2 | 1.0  | -1.1 | 1.0  | YKL171W  |        | 1.0 | -1.4 | -1.2 | -1.4 | putative serine/threonine protein kinase                                 |
| CA2018 | orf19.844   | STE11    | -1.2 | -1.1 | -1.2 | -1.2 | YLR362W  | STE11  | 1.0 | -1.1 | -1.1 | -1.2 | ser/thr protein kinase of the MEKK family (by homology)                  |
| CA2019 | orf19.8463  | IPF3409  | -1.1 | -1.1 | -1.1 | -1.0 | YLR361C  |        | 1.0 | -1.0 | 1.3  | -1.0 | unknown function                                                         |
| CA2021 | orf19.4907  | IPF17283 | 1.1  | 2.8  | 2.3  | 2.9  | YCR061W  |        | 1.0 | 1.2  | 1.3  | 1.2  | unknown function                                                         |
| CA2022 | orf19.4909  | CBK1     | 1.0  | 1.2  | -1.0 | -1.0 | YNL161W  | CBK1   | 1.0 | -1.7 | -1.3 | -1.1 | serine/threonine protein kinase (by homology)                            |
| CA2023 |             | RPL42.3  | 1.9  | 1.1  | 1.1  | 1.4  | YNL162W  | RPL42A | 1.0 | 2.5  | 2.6  | 3.2  | ribosomal protein L36a, 3-prime end (by homology)                        |
| CA2026 | orf19.10962 | IPF9777  | 1.3  | 1.1  | 1.4  | 1.1  | YOL129W  |        | 1.0 | -1.2 | 1.1  | 1.1  | unknown function                                                         |
| CA2027 | orf19.10963 | MCK1     | 1.1  | 1.1  | 1.5  | 1.1  | YLR1307C | MCK1   | 1.0 | 1.1  | 1.3  | 1.3  | ser/thr/tyr protein kinase (by homology)                                 |
| CA2029 | orf19.10966 | SAR1.3   | 1.2  | 1.0  | 1.1  | 1.1  | YPL218W  | SAR1   | 1.0 | 1.1  | 1.3  | 1.1  | GTP-binding protein of the ARF family, 3-prime end (by homology)         |
| CA2030 | orf19.3463  | IPF13116 | -1.1 | -1.3 | -1.3 | -1.3 | YGL099W  | KRE35  | 1.0 | 1.1  | 1.1  | 1.5  | unknown function                                                         |
| CA2031 | orf19.3465  | RPL10A   | 1.2  | -1.0 | 1.1  | 1.2  | YPL220W  | RPL1A  | 1.0 | 2.8  | 4.2  | 4.3  | L10A ribosomal protein                                                   |
| CA2033 | orf19.10971 | SEC27    | -1.5 | -1.3 | -1.7 | -1.4 | YGL137W  | SEC27  | 1.0 | 1.2  | 1.5  | 1.3  | coatomer complex beta chain (beta-cop) of secretory pathway vesicles     |
| CA2035 | orf19.11841 | SGD1.5F  | -1.2 | -1.3 | -1.4 | -1.3 | YLR336C  | SGD1   | 1.0 | -1.2 | 1.0  | 1.1  | Involved in HOG pathway, 5-prime end                                     |
| CA2036 | orf19.4362  | MSP1     | 1.0  | -1.0 | 1.0  | 1.0  | YGR028W  | MSP1   | 1.0 | -1.1 | -1.0 | -1.0 | 40 kDa putative membrane-spanning ATPase                                 |
| CA2038 | orf19.11836 | IPF17510 | -1.0 | 1.0  | 1.1  | 1.2  | YDL157C  |        | 1.0 | -1.1 | -1.2 | -1.1 | unknown function                                                         |
| CA2039 | orf19.11835 | IPF12947 | -1.0 | -1.1 | -1.0 | -1.0 | YMR115W  |        | 1.0 | -1.1 | -1.1 | -1.2 | unknown function                                                         |
| CA2040 | orf19.4356  | IPF12946 | 1.1  | -1.0 | 1.2  | 1.0  | YDL199C  |        | 1.0 | -1.0 | 1.1  | -1.1 | unknown function                                                         |
| CA2042 | orf19.10445 | IPF14219 | 1.0  | -1.0 | 1.1  | 1.1  | YOL107W  |        | 1.0 | -1.0 | 1.7  | 2.2  | probable membrane protein (by homology)                                  |
| CA2043 | orf19.2929  | GSL21    | 1.1  | 1.4  | 1.6  | 1.6  | YLR342W  | FKS1   | 1.0 | -1.1 | 1.6  | 2.3  | 1,3-beta-D-glucan synthase subunit                                       |
| CA2044 | orf19.10447 | IPF10668 | 1.0  | 1.0  | -1.0 | 1.1  | YGR054W  |        | 1.0 | -1.3 | 1.5  | 1.8  | unknown function                                                         |
| CA2045 | orf19.10450 | IPF8107  | 1.1  | -1.0 | -1.0 | 1.0  | YFL044C  |        | 1.0 | 1.0  | 1.2  | 1.1  | unknown function                                                         |
| CA2046 | orf19.10451 | IPF8108  | -1.1 | -1.1 | -1.2 | -1.1 | YLR074C  | BUD20  | 1.0 | 1.4  | 1.7  | 1.6  | unknown function                                                         |
| CA2047 | orf19.10452 | RPL10    | 1.0  | -1.3 | -1.4 | -1.1 | YLR075W  | RPL10  | 1.0 | 2.0  | 2.6  | 3.2  | Ribosomal protein L10 (by homology)                                      |
| CA2052 | orf19.5722  | IPF11027 | -1.0 | -1.0 | -1.1 | -1.0 | YDR026C  |        | 1.0 | -1.3 | -1.3 | -1.1 | unknown function                                                         |
| CA2056 | orf19.2555  | URA5     | 1.2  | 1.5  | 1.5  | 1.6  | YML106W  | URA5   | 1.0 | 1.4  | 1.7  | 1.9  | Orotate phosphoribosyltransferase (by homology)                          |
| CA2057 | orf19.2557  | SEC65    | 1.1  | -1.1 | -1.1 | -1.0 | YML105C  | SEC65  | 1.0 | -1.3 | -1.2 | -1.2 | Recognition particle subunit (by homology)                               |
| CA2059 | orf19.2559  | CDC4     | 1.1  | 1.3  | 1.2  | 1.1  | YFL009W  | CDC4   | 1.0 | -1.4 | 1.1  | 1.3  | CANAL CELL DIVISION CONTROL PROTEIN 4                                    |
| CA2061 | orf19.2562  | CDC61.5F | -1.3 | -1.3 | -2.1 | -1.9 | YPL160W  | CDC60  | 1.0 | -1.5 | -1.1 | 1.4  | Cytosolic leucyl-tRNA synthetase, 5-prime end                            |

|        |             |                    |      |      |      |      |         |               |     |      |      |      |                                                                                     |
|--------|-------------|--------------------|------|------|------|------|---------|---------------|-----|------|------|------|-------------------------------------------------------------------------------------|
| CA2062 | orf19.2563  | <i>IPF7858</i>     | 1.0  | -1.1 | -1.2 | -1.1 | YMR268C | <i>PRP24</i>  | 1.0 | -1.3 | -1.3 | -1.4 | similar to <i>Saccharomyces cerevisiae</i> Prp24p U4/U6 splicing factor (by ho      |
| CA2065 | orf19.2644  | <i>QCR2</i>        | 1.0  | -1.2 | -1.2 | -1.0 | YPR191W | <i>QCR2</i>   | 1.0 | -1.2 | -1.3 | -2.0 | Ubiquinol--cytochrome-c reductase 40KD chain II (by homology)                       |
| CA2066 | orf19.2643  | <i>RPO26</i>       | 1.2  | 1.1  | 1.0  | -1.0 | YPR187W | <i>RPO26</i>  | 1.0 | 1.3  | 1.1  | 1.8  | DNA-directed RNA polymerase I, II, III 18 KD subunit (by homology)                  |
| CA2068 | orf19.2641  | <i>ARP1</i>        | 1.1  | 1.0  | 1.1  | 1.1  | YHR129C | <i>ARP1</i>   | 1.0 | -1.2 | -1.3 | -1.3 | centractin (by homology)                                                            |
| CA2069 | orf19.2640  | <i>FUR1</i>        | 1.0  | 1.1  | 1.1  | 1.0  | YHR128W | <i>FUR1</i>   | 1.0 | -1.3 | 1.2  | 1.4  | Uracil phosphoribosyltransferase (by homology)                                      |
| CA2071 |             | <i>IPF6971.53</i>  | 1.0  | 1.0  | 1.1  | 1.0  | YNL147W | <i>LSM7</i>   | 1.0 | 1.3  | 1.2  | 1.0  | unknown function, internal fragment                                                 |
| CA2072 | orf19.2639  | <i>IPF6970</i>     | 1.0  | 1.0  | 1.0  | 1.0  | YKR085C | <i>MRPL20</i> | 1.0 | -2.0 | -2.0 | -2.0 | unknown function                                                                    |
| CA2076 | orf19.4871  | <i>ERO1</i>        | -1.0 | 1.6  | 2.1  | 1.5  | YML130C | <i>ERO1</i>   | 1.0 | -1.2 | -1.1 | -1.0 | Required for protein disulfide bond formation in the ER (by homology)               |
| CA2080 | orf19.4875  | <i>IPF9693</i>     | 1.0  | 1.1  | 1.1  | 1.0  | YDR482C |               | 1.0 | -1.4 | -1.5 | -1.3 | unknown function                                                                    |
| CA2081 | orf19.4878  | <i>IPF9699</i>     | 1.0  | -1.0 | -1.0 | 1.1  | YIR003W |               | 1.0 | -1.3 | -1.2 | -1.6 | unknown function                                                                    |
| CA2082 |             | <i>NTF2</i>        | 1.8  | 1.3  | 1.7  | 1.5  | YER009W | <i>NTF2</i>   | 1.0 | 1.0  | -1.1 | 1.2  | nuclear transport factor (by homology)                                              |
| CA2083 | orf19.832   | <i>IPF3384.5F</i>  | 1.2  | 1.2  | 1.3  | 1.1  | YLL031C | <i>GPI13</i>  | 1.0 | -1.1 | -1.0 | 1.0  | similar to <i>Saccharomyces cerevisiae</i> Gpi13p phosphoryltransferase that :      |
| CA2085 | orf19.834   | <i>IPF3388</i>     | -1.0 | 1.1  | 1.1  | 1.0  | YHR204W | <i>HTM1</i>   | 1.0 | -1.5 | -1.3 | -1.1 | unknown function                                                                    |
| CA2086 | orf19.835   | <i>IPF3392</i>     | -1.1 | 1.1  | 1.1  | -1.0 | YFL013C | <i>IES1</i>   | 1.0 | -1.2 | -1.0 | 1.0  | unknown function                                                                    |
| CA2089 | orf19.837   | <i>GNA1</i>        | -1.1 | -1.0 | 1.0  | 1.1  | YFL017C | <i>GNA1</i>   | 1.0 | 1.0  | 1.1  | 1.1  | Acetyltransferase                                                                   |
| CA2091 | orf19.839   | <i>IPF3401</i>     | -1.0 | 1.1  | 1.2  | 1.1  | YLR143W |               | 1.0 | -1.5 | -1.4 | -1.1 | unknown function                                                                    |
| CA2092 | orf19.840   | <i>RPL21A.3</i>    | 1.1  | -1.1 | -1.1 | 1.1  | YBR191W | <i>RPL21A</i> | 1.0 | 1.1  | 1.2  | 2.3  | Ribosomal protein, 3-prime end (by homology)                                        |
| CA2093 | orf19.841   | <i>IPF3406</i>     | -1.2 | -1.2 | -1.4 | -1.4 | YKL179C |               | 1.0 | -1.2 | 1.1  | -1.0 | unknown function                                                                    |
| CA2096 | orf19.2391  | <i>IPF11491</i>    | 1.1  | -1.0 | -1.2 | -1.1 | YKR023W |               | 1.0 | 1.1  | 1.3  | 1.4  | unknown function                                                                    |
| CA2097 | orf19.2389  | <i>IPF11489</i>    | 1.1  | 1.1  | 1.0  | 1.1  | YKL108W | <i>SLD2</i>   | 1.0 | -1.3 | -1.3 | -1.6 | unknown function                                                                    |
| CA2098 | orf19.2387  | <i>IPF11487</i>    | -1.0 | -1.1 | -1.1 | -1.0 | YMR098C |               | 1.0 | -1.0 | -1.0 | -1.3 | unknown function                                                                    |
| CA2099 | orf19.2386  | <i>IPF11484</i>    | 1.0  | -1.1 | -1.2 | -1.1 | YKL099C |               | 1.0 | 1.4  | 1.1  | -1.1 | unknown function                                                                    |
| CA2100 | orf19.2385  | <i>KTI12</i>       | -1.0 | -1.1 | -1.2 | -1.0 | YKL110C | <i>KTI12</i>  | 1.0 | 1.2  | 1.0  | 1.2  | involved in resistance to <i>K.lactis</i> killer toxin (by homology)                |
| CA2101 | orf19.2384  | <i>IPF9364</i>     | -1.0 | -1.1 | -1.1 | 1.0  | YMR097C |               | 1.0 | -2.8 | -2.2 | -2.5 | unknown function                                                                    |
| CA2102 | orf19.2383  | <i>IPF9363</i>     | -1.0 | 1.1  | 1.0  | 1.1  | YMR106C | <i>YKU80</i>  | 1.0 | -1.4 | -1.2 | -1.1 | similar to <i>Saccharomyces cerevisiae</i> Yku80p component of DNA end-join         |
| CA2103 | orf19.9918  | <i>ISM1</i>        | -1.1 | -1.1 | -1.3 | -1.1 | YPL040C | <i>ISM1</i>   | 1.0 | -2.6 | -2.8 | -2.7 | isoleucyl-tRNA synthetase (by homology)                                             |
| CA2106 | orf19.3693  | <i>IPF10714</i>    | -1.0 | -1.1 | -1.1 | -1.0 | YLR343W |               | 1.0 | 1.0  | 1.2  | 1.2  | similar to pH-regulated (PHR) proteins                                              |
| CA2107 | orf19.3691  | <i>IPF10716</i>    | 1.1  | -1.1 | -1.0 | -1.1 | YGR033C |               | 1.0 | -1.1 | -1.1 | -1.1 | unknown function                                                                    |
| CA2108 |             | <i>RPL26A.3</i>    | 1.1  | -1.1 | 1.2  | 1.2  | YLR344W | <i>RPL26A</i> | 1.0 | 1.8  | 2.1  | 2.3  | ribosomal protein, 3-prime end (by homology)                                        |
| CA2109 | orf19.3690  | <i>IPF13749.5F</i> | -1.1 | -1.4 | -1.3 | -1.4 | YLR345W |               | 1.0 | 1.0  | 1.3  | 1.5  | unknown function, 5-prime end                                                       |
| CA2111 | orf19.3688  | <i>IPF13748</i>    | 1.1  | 1.1  | 1.2  | 1.0  | YJL184W |               | 1.0 | -1.4 | -1.4 | -1.4 | Unknown function                                                                    |
| CA2112 | orf19.3687  | <i>PFD1</i>        | 1.0  | 1.1  | -1.0 | -1.0 | YJL179W | <i>PFD1</i>   | 1.0 | -1.3 | -1.5 | 1.0  | Prefoldin subunit 1 (by homology)                                                   |
| CA2113 | orf19.3686  | <i>ATP12</i>       | -1.1 | -1.1 | -1.0 | -1.0 | YJL180C | <i>ATP12</i>  | 1.0 | -2.0 | -2.5 | -2.3 | F1F0-ATPase complex assembly protein (by homology)                                  |
| CA2114 | orf19.3685  | <i>IPF13744</i>    | 1.0  | -1.0 | -1.1 | -1.1 | YNL201C |               | 1.0 | 1.1  | 1.2  | 1.6  | protein involved in regulation of carbon metabolism (by homology)                   |
| CA2115 | orf19.8911  | <i>IPF8030</i>     | 1.2  | 1.3  | 1.4  | 1.2  | YBR272C | <i>HSM3</i>   | 1.0 | -1.2 | -1.2 | -1.1 | unknown function                                                                    |
| CA2119 | orf19.8915  | <i>MTR4</i>        | -1.2 | -1.3 | -1.5 | -1.2 | YJL050W | <i>MTR4</i>   | 1.0 | -1.1 | 1.1  | 1.4  | RNA Helicase (by homology)                                                          |
| CA2120 |             | <i>PUP3</i>        | 1.0  | 1.1  | 1.2  | 1.1  | YER094C | <i>PUP3</i>   | 1.0 | -1.0 | -1.1 | -1.1 | PRCT yeast proteasome component (by homology)                                       |
| CA2121 | orf19.8918  | <i>IPF7930</i>     | -1.2 | -1.2 | -1.2 | -1.1 | YJL123C |               | 1.0 | 1.0  | 1.5  | 1.3  | unknown function                                                                    |
| CA2125 | orf19.418   | <i>IPF4893</i>     | -1.1 | 1.0  | -1.1 | -1.1 | YHR186C |               | 1.0 | 1.2  | 1.9  | 2.6  | unknown function                                                                    |
| CA2126 | orf19.417   | <i>IPF4896</i>     | 1.0  | -1.0 | -1.1 | -1.1 | YGR257C |               | 1.0 | 1.2  | 1.1  | 1.1  | unknown function                                                                    |
| CA2128 | orf19.415   | <i>IPF4898</i>     | -1.1 | 1.0  | -1.0 | 1.1  | YGR235C |               | 1.0 | -1.4 | -1.0 | -1.4 | unknown function                                                                    |
| CA2129 | orf19.414   | <i>IPF4899</i>     | -1.0 | -1.1 | -1.1 | 1.0  | YKL155C | <i>RSM22</i>  | 1.0 | -1.2 | -1.1 | 1.0  | unknown function                                                                    |
| CA2132 | orf19.5212  | <i>IPF5865</i>     | -1.0 | 1.0  | 1.0  | -1.0 | YLR394W | <i>CST9</i>   | 1.0 | 1.2  | -1.0 | -1.0 | unknown function                                                                    |
| CA2134 | orf19.5213  | <i>COX8</i>        | 1.5  | 1.3  | 1.4  | 1.5  | YLR395C | <i>COX8</i>   | 1.0 | -1.1 | -1.2 | -1.5 | CYTOCHROME C OXIDASE (by homology)                                                  |
| CA2135 |             | <i>COX9</i>        | 1.4  | 1.1  | 1.4  | 1.2  | YDL067C | <i>COX9</i>   | 1.0 | -1.1 | -1.4 | -1.8 | CYTOCHROME C OXIDASE (by homology)                                                  |
| CA2136 | orf19.5214  | <i>VPS33</i>       | 1.0  | -1.0 | -1.0 | 1.0  | YLR396C | <i>VPS33</i>  | 1.0 | -1.3 | -1.4 | -1.3 | VACUOLAR PROTEIN SORTING (by homology)                                              |
| CA2137 | orf19.2507  | <i>ARP9</i>        | -1.1 | -1.1 | -1.1 | -1.1 | YMR033W | <i>ARP9</i>   |     |      |      |      | actin-related protein (by homology)                                                 |
| CA2140 | orf19.10046 | <i>IPF19665</i>    | -1.5 | -1.3 | -1.2 | -1.0 | YOR349W | <i>CIN1</i>   | 1.0 | -1.3 | -1.3 | -1.9 | unknown function                                                                    |
| CA2142 |             | <i>MRPL33</i>      | 1.0  | 1.1  | 1.0  | 1.0  | YMR286W | <i>MRPL33</i> |     |      |      |      | ribosomal protein of the large subunit, mitochondrial (by homology)                 |
| CA2148 | orf19.6020  | <i>AUT1</i>        | -1.0 | 1.0  | 1.0  | 1.0  | YNR007C | <i>AUT1</i>   | 1.0 | -1.2 | 1.2  | 1.0  | similar to <i>Saccharomyces cerevisiae</i> Aut1p essential for autophagocytosi      |
| CA2153 | orf19.6025  | <i>IPF7900</i>     | -1.1 | 1.0  | 1.0  | -1.0 | YGL047W |               | 1.0 | -1.9 | -1.6 | -1.4 | unknown function                                                                    |
| CA2154 | orf19.6026  | <i>ERG2</i>        | 1.0  | -1.3 | -1.3 | -1.2 | YMR202W | <i>ERG2</i>   | 1.0 | -1.8 | 1.2  | 1.9  | C-8 sterol isomerase                                                                |
| CA2155 | orf19.6027  | <i>IPF7903</i>     | -1.0 | -1.0 | -1.0 | -1.0 | YPL255W | <i>BBP1</i>   | 1.0 | -1.1 | -1.1 | -1.0 | unknown function                                                                    |
| CA2157 | orf19.5300  | <i>IPF8537</i>     | -1.1 | -1.1 | -1.1 | -1.1 | YAL058W | <i>CNE1</i>   | 1.0 | -1.3 | -1.3 | -1.3 | similar to <i>Saccharomyces cerevisiae</i> Cne1p calnexin, involved in regulati     |
| CA2158 | orf19.5299  | <i>ECM1</i>        | -1.0 | -1.0 | -1.1 | 1.0  | YAL059W | <i>ECM1</i>   | 1.0 | -1.5 | -1.3 | -1.0 | involved in cell wall biosynthesis (by homology)                                    |
| CA2159 | orf19.5297  | <i>IPF19753</i>    | -1.1 | -1.0 | -1.1 | -1.1 | YDR311W | <i>TFB1</i>   | 1.0 | 1.1  | 1.0  | 1.1  | similar to <i>Saccharomyces cerevisiae</i> Tfb1p transcription initiation factor (l |
| CA2160 | orf19.5296  | <i>IPF15664</i>    | 1.1  | -1.0 | 1.0  | 1.0  | YIL157C |               | 1.0 | -1.1 | -1.2 | -1.4 | unknown function                                                                    |
| CA2162 | orf19.5294  | <i>PDB1</i>        | -1.2 | -1.8 | -1.4 | -1.4 | YBR221C | <i>PDB1</i>   | 1.0 | -2.0 | -2.6 | -2.0 | pyruvate dehydrogenase (by homology)                                                |
| CA2164 | orf19.5292  | <i>AXL2</i>        | 1.2  | 1.1  | 1.2  | 1.2  | YIL140W | <i>AXL2</i>   | 1.0 | 1.3  | 1.5  | 1.4  | similar to <i>saccharomyces cerevisiae</i> Axl2p required for axial pattern of bt   |
| CA2165 | orf19.5291  | <i>IPF17024</i>    | -1.0 | -1.0 | -1.1 | -1.0 | YGL126W | <i>SCS3</i>   | 1.0 | -1.1 | -1.2 | -1.1 | unknown function                                                                    |
| CA2167 | orf19.909   | <i>IPF4553</i>     | -1.1 | 1.1  | -1.0 | 1.0  | YDL048C | <i>STP4</i>   | 1.0 | 1.1  | 1.4  | 3.7  | unknown function                                                                    |

|        |             |                    |      |      |      |      |         |              |     |      |      |      |                                                                                          |
|--------|-------------|--------------------|------|------|------|------|---------|--------------|-----|------|------|------|------------------------------------------------------------------------------------------|
| CA2168 | orf19.910   | <i>IPF4558</i>     | 1.0  | 1.1  | -1.0 | 1.0  | YDR473C | <i>PRP3</i>  | 1.0 | -1.2 | -1.3 | -1.2 | similar to <i>Saccharomyces cerevisiae</i> Prp3p splicing factor (by homology)           |
| CA2171 | orf19.3767  | <i>PEP1.3</i>      | -1.6 | -1.1 | -1.5 | -1.2 | YBL017C | <i>PEP1</i>  | 1.0 | -1.6 | -1.6 | -1.5 | Vacuolar protein sorting/targeting protein, 3-prime end (by homology)                    |
| CA2172 | orf19.3765  | <i>IPF15377</i>    | -1.0 | 1.1  | 1.2  | 1.1  | YLR084C | <i>RAX2</i>  | 1.0 | -1.3 | -1.3 | -1.4 | probable membrane protein involved in bipolar budding (by homology)                      |
| CA2173 | orf19.3764  | <i>IPF18527</i>    | -1.1 | -1.2 | -1.2 | -1.0 | YDR108W | <i>GSG1</i>  | 1.0 | 1.0  | 1.1  | 1.1  | unknown function                                                                         |
| CA2176 | orf19.11245 | <i>CDC54</i>       | -1.1 | -1.0 | -1.1 | -1.1 | YPR019W | <i>CDC54</i> | 1.0 | -1.0 | -1.1 | -1.1 | cell division control protein (by homology)                                              |
| CA2177 | orf19.9084  | <i>ROD1</i>        | 1.1  | 1.1  | 1.1  | 1.0  | YFR022W |              | 1.0 | -1.4 | -1.4 | -1.1 | O-dinitrobenzene,calcium and zinc resistance protein (by homology)                       |
| CA2178 | orf19.1510  | <i>IPF9282</i>     | 1.1  | 1.3  | 1.5  | 1.2  | YOL019W | <i>TOS7</i>  | 1.0 | -1.1 | 1.0  | 1.4  | unknown function                                                                         |
| CA2179 | orf19.9088  | <i>FAB1</i>        | -1.1 | 1.0  | -1.3 | -1.0 | YFR019W | <i>FAB1</i>  | 1.0 | -1.4 | -1.3 | -1.3 | phosphatidylinositol 3-phosphate 5-kinase (by homology)                                  |
| CA2181 | orf19.4255  | <i>ECM331</i>      | 1.1  | 2.5  | 2.8  | 2.4  | YDR055W | <i>PST1</i>  | 1.0 | 1.1  | 2.1  | 1.9  | Involved in cell wall biogenesis and architecture (by homology)                          |
| CA2183 | orf19.4252  | <i>IPF6872</i>     | 1.0  | -1.0 | 1.0  | -1.0 | YGR262C | <i>BUD32</i> | 1.0 | -1.2 | -1.1 | -1.2 | serine/threonine protein kinase (by homology)                                            |
| CA2188 | orf19.4772  | <i>SSU81</i>       | 1.2  | 1.2  | 1.4  | 1.2  | YER118C | <i>SHO1</i>  | 1.0 | -2.1 | -1.5 | -1.4 | protein involved in the HOG1 high-osmolarity signal transduction pathway                 |
| CA2191 | orf19.4775  | <i>IPF9417</i>     | -1.0 | -1.0 | -1.0 | 1.0  | YGL073W | <i>HSF1</i>  | 1.0 | 1.1  | 1.3  | 1.2  | similar to <i>Saccharomyces cerevisiae</i> Hsf1p heat shock transcription factor         |
| CA2193 | orf19.11824 | <i>IPF14273</i>    | -1.0 | -1.0 | 1.1  | 1.0  | YKL116C | <i>PRR1</i>  | 1.0 | -1.5 | -1.3 | -1.2 | Probable ser/thr protein kinase (by homology)                                            |
| CA2194 | orf19.11825 | <i>RGR1</i>        | -1.3 | -1.1 | -1.3 | -1.1 | YLR071C | <i>RGR1</i>  | 1.0 | -1.3 | -1.2 | -1.1 | DNA-directed RNA polymerase II (by homology)                                             |
| CA2195 | orf19.11826 | <i>IPF18517.3F</i> | -1.4 | -1.2 | -1.4 | -1.3 | YOL070C |              | 1.0 | 1.1  | 1.2  | 1.3  | unknown function, 3-prime end                                                            |
| CA2198 | orf19.2937  | <i>PMM1</i>        | 1.2  | 1.5  | 1.4  | 1.3  | YFL045C | <i>SEC53</i> | 1.0 | -1.4 | 1.7  | 1.8  | phosphomannomutase                                                                       |
| CA2199 | orf19.2938  | <i>IPF8113</i>     | -1.3 | -1.1 | -1.1 | -1.0 | YLR077W |              | 1.0 | 1.0  | -1.1 | 1.0  | unknown function                                                                         |
| CA2200 | orf19.2939  | <i>IPF8114</i>     | -1.0 | -1.0 | 1.0  | 1.1  | YFL046W |              | 1.0 | -1.6 | -1.4 | -1.2 | unknown function                                                                         |
| CA2201 | orf19.2940  | <i>BOS1</i>        | 1.0  | -1.0 | -1.0 | 1.0  | YLR078C | <i>BOS1</i>  | 1.0 | 1.1  | 1.2  | 1.3  | ER-to-Golgi v-SNARE (by homology)                                                        |
| CA2203 | orf19.2942  | <i>DIP51.3F</i>    | 1.0  | -2.4 | -2.7 | -2.6 | YPL265W | <i>DIP5</i>  | 1.0 | -1.7 | -1.3 | 1.0  | dicarboxylic amino acid permease, 3-prime end (by homology)                              |
| CA2205 | orf19.8319  | <i>SEO2</i>        | 1.0  | 1.0  | 1.0  | 1.1  | YAL067C | <i>SEO1</i>  | 1.0 | -1.8 | -1.9 | -1.9 | suppressor of sulfoxide ethionine resistance                                             |
| CA2206 | orf19.698   | <i>IPF12173</i>    | 1.0  | -1.1 | 1.0  | -1.1 | YIL090W |              | 1.0 | -1.1 | -1.2 | -1.0 | unknown function                                                                         |
| CA2207 | orf19.8316  | <i>IPF12169</i>    | 1.0  | -1.0 | -1.0 | -1.1 | YHR017W | <i>YSC83</i> | 1.0 | -1.1 | -1.1 | -1.0 | unknown function                                                                         |
| CA2208 | orf19.696   | <i>IPF17255</i>    | 1.1  | 1.0  | 1.1  | -1.0 | YFL026W | <i>STE2</i>  | 1.0 | 1.1  | 1.5  | 2.9  | similar to <i>Saccharomyces cerevisiae</i> Ste2p pheromone alpha-factor receptor         |
| CA2209 | orf19.695   | <i>IPF18512</i>    | -1.0 | -1.1 | -1.1 | -1.1 | YOR107W | <i>RGS2</i>  | 1.0 | -2.0 | 1.1  | 1.4  | unknown function                                                                         |
| CA2210 | orf19.4748  | <i>MSL1</i>        | -1.0 | 1.0  | 1.2  | 1.1  | YIR009W | <i>MSL1</i>  | 1.0 | -1.2 | -1.1 | -1.1 | U2 snRNA-associated protein (by homology)                                                |
| CA2213 | orf19.4751  | <i>IPF16405</i>    | -1.0 | -1.3 | -1.1 | 1.1  | YIL093C | <i>RSM25</i> | 1.0 | 1.1  | -1.1 | -1.1 | similar to <i>saccharomyces cerevisiae</i> Rsm25p protein of the small subunit           |
| CA2214 | orf19.4752  | <i>IPF9939</i>     | 1.1  | 2.8  | 4.2  | 2.5  | YKL062W | <i>MSN4</i>  | 1.0 | -1.0 | 1.2  | 1.3  | similar to <i>Saccharomyces cerevisiae</i> Msn4p transcriptional activator (by homology) |
| CA2215 | orf19.4753  | <i>PFK26</i>       | -1.1 | 1.2  | -1.1 | 1.2  | YIL107C | <i>PFK26</i> | 1.0 | -1.1 | -1.1 | -1.2 | 6-phosphofructose-2-kinase (by homology)                                                 |
| CA2219 | orf19.12563 | <i>CAT8</i>        | 1.0  | -1.0 | -1.1 | -1.1 | YMR280C | <i>CAT8</i>  | 1.0 | -1.4 | -1.1 | -1.8 | transcription factor involved in gluconeogenesis (by homology)                           |
| CA2220 | orf19.5098  | <i>NTG1</i>        | 1.0  | -1.1 | 1.1  | 1.0  | YOL043C | <i>NTG2</i>  | 1.0 | 1.1  | 1.1  | -1.1 | endonuclease III-like glycosylase (by homology)                                          |
| CA2222 | orf19.5101  | <i>CCR4</i>        | -1.0 | 1.0  | -1.0 | -1.0 | YAL021C | <i>CCR4</i>  | 1.0 | -1.8 | -2.0 | -1.7 | glucose-repressible alcohol dehydrogenase transcriptional eff                            |
| CA2225 | orf19.5818  | <i>SUR2</i>        | 1.0  | 3.3  | 4.8  | 3.8  | YDR297W | <i>SUR2</i>  | 1.0 | -1.5 | -1.1 | 1.2  | Hydroxylation of C-4 of the sphingoid moiety of ceramide by homology                     |
| CA2226 | orf19.5817  | <i>3ET3.EXON2</i>  | 1.2  | 1.2  | 1.3  | 1.2  | YKR068C | <i>BET3</i>  | 1.0 | 1.1  | 1.0  | -1.1 | targeting and fusion of ER to Golgi transport vesicles, exon 2 (by homology)             |
| CA2231 | orf19.3926  | <i>IPF10934</i>    | 1.0  | 1.0  | 1.0  | -1.0 | YPL123C | <i>RNY1</i>  | 1.0 | -1.2 | -1.2 | -1.3 | similar to <i>Saccharomyces cerevisiae</i> Rny1 ribonuclease from the T2 family          |
| CA2235 | orf19.3920  | <i>MPD1</i>        | 1.1  | 1.0  | 1.0  | 1.0  | YOR288C | <i>MPD1</i>  | 1.0 | -1.1 | -1.0 | -1.1 | disulfide isomerase related protein (by homology)                                        |
| CA2238 | orf19.3916  | <i>IPF10032.5F</i> | -1.1 | -1.1 | -1.1 | -1.1 | YJR011C |              | 1.0 | 1.2  | 1.1  | 1.0  | unknown function, 5-prime end                                                            |
| CA2249 | orf19.2365  | <i>POL2</i>        | -1.1 | -1.1 | -1.2 | -1.1 | YNL262W | <i>POL2</i>  | 1.0 | -1.4 | 1.1  | -1.1 | DNA-directed DNA polymerase epsilon, catalytic subunit A (by homology)                   |
| CA2250 | orf19.2364  | <i>MIS11</i>       | -1.0 | -1.3 | -1.3 | -1.3 | YBR084W | <i>MIS1</i>  | 1.0 | -1.6 | -1.3 | 1.3  | mitochondrial C1-tetrahydrofolate synthase precursor (by homology)                       |
| CA2251 | orf19.2363  | <i>IPF12845</i>    | 1.2  | 1.2  | 1.4  | 1.2  | YOR286W |              | 1.0 | 1.0  | -1.1 | -1.1 | unknown function                                                                         |
| CA2252 | orf19.9898  | <i>IPF12844</i>    | -1.0 | -1.0 | -1.0 | -1.0 | YOR287C |              | 1.0 | -1.1 | 1.0  | 1.2  | unknown function                                                                         |
| CA2253 | orf19.1959  | <i>IPF15485</i>    | -1.0 | -1.1 | -1.1 | -1.0 | YHL013C |              | 1.0 | -1.2 | 1.2  | -1.1 | unknown function                                                                         |
| CA2255 | orf19.1957  | <i>CYC3</i>        | 1.0  | -1.1 | 1.0  | -1.0 | YAL039C | <i>CYC3</i>  | 1.0 | -1.0 | 1.1  | -1.1 | cytochrome C heme lyase                                                                  |
| CA2256 | orf19.1956  | <i>IPF14757</i>    | -1.1 | -1.2 | -1.3 | -1.2 | YOR354C | <i>MSC6</i>  | 1.0 | -1.1 | 1.2  | 1.1  | unknown function                                                                         |
| CA2257 | orf19.1955  | <i>SHR5</i>        | 1.0  | 1.0  | -1.0 | -1.0 | YOL110W | <i>SHR5</i>  | 1.0 | -1.7 | -1.7 | -1.6 | RAS suppressor (by homology)                                                             |
| CA2259 | orf19.1762  | <i>IPF6845</i>     | 1.0  | 1.0  | -1.0 | -1.0 | YNL099C |              | 1.0 | -1.2 | -1.2 | -1.2 | unknown function                                                                         |
| CA2260 | orf19.1761  | <i>OST2</i>        | 1.1  | 1.1  | 1.4  | 1.2  | YOR103C | <i>OST2</i>  | 1.0 | 1.2  | 1.1  | 1.2  | Oligosaccharyltransferase epsilon subunit                                                |
| CA2261 | orf19.1760  | <i>RAS1</i>        | -1.0 | 1.1  | 1.1  | 1.0  | YNL098C | <i>RAS2</i>  | 1.0 | 1.4  | 1.7  | -1.1 | GTP-binding protein (by homology)                                                        |
| CA2262 | orf19.1757  | <i>IPF6857</i>     | 1.0  | 1.1  | 1.0  | 1.0  | YDR253C | <i>MET32</i> | 1.0 | -2.0 | 1.2  | 1.5  | putative transcriptional regulator (unknown function)                                    |
| CA2263 | orf19.1756  | <i>GPD1</i>        | -1.0 | 1.3  | 1.8  | 1.8  | YOL059W | <i>GPD2</i>  | 1.0 | 1.7  | 3.0  | 6.5  | Glycerol-3-phosphate dehydrogenase (by homology)                                         |
| CA2265 | orf19.1754  | <i>CMK2</i>        | -1.1 | -1.1 | -1.1 | 1.0  | YOL016C | <i>CMK2</i>  | 1.0 | -1.1 | 1.2  | 1.1  | Ca2+/calmodulin-dependent ser/thr protein kinase, type II (by homology)                  |
| CA2266 | orf19.10132 | <i>HEM1</i>        | -1.0 | 1.1  | 1.0  | 1.1  | YDR232W | <i>HEM1</i>  | 1.0 | 1.2  | 1.3  | 2.0  | 5-aminolevulinic acid synthase                                                           |
| CA2267 | orf19.2600  | <i>IFU1.5F</i>     | -1.1 | -1.1 | -1.1 | 1.0  | YNL126W | <i>SPC98</i> | 1.0 | 1.1  | 1.1  | -1.1 | Unknown function, 5-prime end                                                            |
| CA2269 | orf19.2599  | <i>YOR100</i>      | 1.2  | -1.8 | -2.0 | -1.6 | YOR100C | <i>CRC1</i>  | 1.0 | -1.1 | -1.1 | -1.1 | Putative mitochondrial carrier protein                                                   |
| CA2270 | orf19.2598  | <i>VMA4</i>        | 1.0  | -1.2 | -1.1 | 1.0  | YOR332W | <i>VMA4</i>  | 1.0 | 1.3  | 1.6  | 1.6  | H+-transporting ATPase E chain                                                           |
| CA2271 | orf19.2597  | <i>MRS2</i>        | -1.0 | 1.0  | -1.0 | 1.0  | YOR334W | <i>MRS2</i>  | 1.0 | -1.2 | -1.3 | -1.1 | Mitochondrial RNA splicing protein (by homology)                                         |
| CA2272 | orf19.2594  | <i>RPA43</i>       | 1.1  | -1.0 | -1.1 | -1.0 | YOR340C | <i>RPA43</i> | 1.0 | -2.2 | -2.0 | -1.3 | DNA-directed RNA polymerase I, 36 KD subunit (by homology)                               |
| CA2273 | orf19.2593  | <i>BIO2</i>        | -1.1 | -1.1 | -1.1 | -1.1 | YGR286C | <i>BIO2</i>  | 1.0 | -1.1 | -1.1 | 1.0  | biotin synthetase (by homology)                                                          |
| CA2274 | orf19.2591  | <i>BIO3</i>        | 1.0  | 1.0  | 1.0  | -1.0 | YNR058W | <i>BIO3</i>  | 1.0 | -1.1 | -1.2 | -1.0 | DAPA aminotransferase (by homology)                                                      |
| CA2275 | orf19.2590  | <i>BIO4</i>        | 1.1  | 1.1  | -1.0 | 1.1  | YNR057C | <i>BIO4</i>  | 1.0 | -1.0 | 1.0  | -1.0 | dethiobiotin synthetase (by homology)                                                    |
| CA2277 | orf19.783   | <i>DRS21</i>       | 1.1  | 1.1  | 1.1  | 1.1  | YIL048W | <i>NEO1</i>  | 1.0 | 1.1  | 1.3  | 1.6  | Membrane-spanning Ca-ATPase (by homology)                                                |

|        |             |             |      |      |      |      |         |        |     |      |      |      |                                                                         |
|--------|-------------|-------------|------|------|------|------|---------|--------|-----|------|------|------|-------------------------------------------------------------------------|
| CA2278 | orf19.782   | IPF10806    | -1.1 | -1.2 | -1.1 | -1.1 | YBR204C |        | 1.0 | -1.0 | -1.1 | 1.1  | unknown function                                                        |
| CA2279 | orf19.781   | DUR31       | -1.0 | 1.0  | 1.0  | 1.0  | YHL016C | DUR3   | 1.0 | 1.2  | 1.8  | 1.3  | Urea transport protein (by homology)                                    |
| CA2280 | orf19.780   | DUR1,2      | -1.0 | 1.2  | 1.2  | 1.5  | YBR208C | DUR1,2 | 1.0 | -1.4 | -1.9 | -1.5 | urea amidolyase (by homology)                                           |
| CA2281 | orf19.779   | HAT1        | -1.0 | 1.0  | -1.1 | -1.0 | YPL001W | HAT1   | 1.0 | -1.1 | 1.2  | 1.3  | histone acetyltransferase (by homology)                                 |
| CA2283 | orf19.12996 | MRT4        | -1.0 | 1.1  | 1.1  | 1.1  | YKL009W | MRT4   | 1.0 | 1.4  | 1.3  | 1.8  | required for mRNA decay (by homology)                                   |
| CA2284 | orf19.5551  | MIF2        | -1.0 | 1.0  | -1.1 | -1.1 | YKL089W | MIF2   | 1.0 | -1.4 | -1.4 | -1.4 | required for normal chromosome segregation and spindle integrity (by ho |
| CA2285 | orf19.5552  | IPF12629    | -1.1 | 1.1  | 1.4  | 1.1  | YOL063C |        | 1.0 | 1.1  | 1.2  | 1.2  | unknown function                                                        |
| CA2286 | orf19.5553  | IPF5369     | 1.1  | 1.1  | -1.0 | 1.2  | YKL069W |        | 1.0 | -2.3 | -2.4 | -2.5 | unknown function                                                        |
| CA2291 | orf19.744   | IPF9740     | -1.2 | -1.4 | -1.6 | -1.3 | YPR184W | GDB1   | 1.0 | 1.7  | 1.2  | -1.5 | oligo-1,4 -1,4-glucontransferase / amylo-1,6-glicosidase (by homology)  |
| CA2292 | orf19.745   | VAC8        | -1.1 | 1.2  | 1.0  | 1.1  | YEL013W | VAC8   | 1.0 | -1.1 | 1.2  | 1.4  | required for vacuole inheritance and protein targeting from the cyt     |
| CA2293 | orf19.746   | IPF9748     | 1.0  | 1.0  | -1.0 | -1.0 | YJL049W |        | 1.0 | -1.1 | 1.0  | 1.1  | unknown function                                                        |
| CA2294 | orf19.747   | IPF19946    | -1.1 | 1.2  | 1.1  | 1.1  | YGL091C | NBP35  | 1.0 | -1.1 | -1.0 | -1.4 | similar to Saccharomyces cerevisiae Nbp35p nucleotide-binding protein   |
| CA2295 | orf19.5377  | HOS2        | -1.1 | 1.0  | -1.0 | 1.0  | YGL194C | HOS2   | 1.0 | -1.3 | -1.3 | -1.1 | putative histone deacetylase (by homology)                              |
| CA2296 | orf19.5378  | SCL1        | 1.2  | 1.0  | 1.0  | 1.1  | YGL011C | SCL1   | 1.0 | -1.5 | 1.2  | 1.4  | Proteasome subunit YC7alpha (by homology)                               |
| CA2297 | orf19.5379  | ERG4        | 1.5  | -1.7 | -1.2 | -1.4 | YGL012W | ERG4   | 1.0 | 1.1  | 1.1  | 1.5  | sterol C-24 reductase (by homology)                                     |
| CA2299 | orf19.5381  | IPF8222     | -1.0 | -1.0 | 1.0  | -1.0 | YGL014W | PUF4   | 1.0 | -1.1 | -1.3 | -1.1 | unknown function                                                        |
| CA2300 | orf19.5383  | PMA1        | 1.6  | 1.4  | 1.2  | -1.1 | YGL008C | PMA1   | 1.0 | -2.3 | -1.5 | 2.0  | plasma membrane H <sup>+</sup> -transporting ATPase 1                   |
| CA2303 | orf19.1690  | TOS1        | 1.3  | 1.1  | 1.3  | 1.1  | YBR162C | TOS1   | 1.0 | -1.1 | -1.4 | 1.2  | putative Anchor subunit of a-agglutinin (by homology)                   |
| CA2304 | orf19.1687  | PRP43       | -1.0 | -1.0 | -1.1 | -1.0 | YGL120C | PRP43  | 1.0 | 1.2  | 1.3  | 1.9  | RNA-dependent ATPase (by homology)                                      |
| CA2305 | orf19.1686  | MPA43       | -1.1 | -1.0 | -1.1 | -1.0 | YNL249C | MPA43  | 1.0 | -1.2 | 1.1  | 1.0  | Unknown function                                                        |
| CA2308 | orf19.8953  | IPF9874.3   | 1.1  | -1.0 | 1.1  | -1.1 | YIL002C | INP51  | 1.0 | 1.0  | -1.0 | 1.0  | similar to Saccharomyces cerevisiae Inp51p phosphatidylinositol phosph  |
| CA2311 | orf19.1376  | SSO2        | 1.3  | 1.2  | 1.5  | 1.4  | YMR183C | SSO2   | 1.0 | 1.1  | 1.3  | 1.1  | syntxin (by homology)                                                   |
| CA2312 | orf19.1377  | IPF16498    | -1.1 | -1.0 | -1.0 | -1.0 | YDR173C | ARG82  | 1.0 | 1.5  | 1.1  | 1.1  | similar to Saccharomyces cerevisiae Arg82p arginine metabolism transcr  |
| CA2313 | orf19.1378  | ERF3        | -1.0 | -1.0 | -1.1 | -1.1 | YDR172W | SUP35  | 1.0 | -1.8 | -1.1 | 1.1  | translation release factor 3                                            |
| CA2314 | orf19.1381  | IPF14545    | 1.0  | 1.3  | 1.4  | 1.4  | YCL034W | LSB5   | 1.0 | 1.3  | 1.3  | 1.5  | unknown function                                                        |
| CA2315 | orf19.8962  | YEA4        | 1.0  | 1.2  | 1.2  | 1.2  | YEL004W | YEA4   | 1.0 | -1.2 | -1.2 | 1.2  | Golgi uridine diphosphate-N-acetylglucosamine transporter (by homology) |
| CA2318 | orf19.5480  | ILV1        | -1.1 | 1.2  | 1.3  | 1.2  | YER086W | ILV1   | 1.0 | -1.2 | -1.2 | 1.3  | Threonine dehydratase (by homology)                                     |
| CA2319 | orf19.5483  | GUF1        | -1.2 | -1.3 | -1.3 | -1.3 | YLR289W | GUF1   | 1.0 | -1.7 | -1.5 | -1.6 | GTP-binding protein (by homology)                                       |
| CA2320 | orf19.5484  | SER1        | -1.1 | -1.3 | -1.3 | -1.3 | YOR184W | SER1   | 1.0 | 1.0  | 1.3  | 1.7  | phosphoserine transaminase (by homology)                                |
| CA2321 | orf19.5485  | MEC3        | -1.0 | 1.0  | -1.0 | 1.0  | YLR288C | MEC3   | 1.0 | -1.3 | -1.3 | -1.4 | G2-specific checkpoint protein (by homology)                            |
| CA2322 | orf19.5486  | YSH1        | -1.3 | -1.1 | -1.3 | -1.2 | YLR277C | YSH1   | 1.0 | -1.4 | -1.4 | -1.2 | component of pre-mRNA polyadenylation factor PF I (by homology)         |
| CA2323 |             | SMD2        | -1.0 | 1.0  | 1.0  | -1.0 | YLR275W | SMD2   | 1.0 | 1.1  | -1.0 | 1.1  | U1 snRNP protein of the Sm class protein (by homology)                  |
| CA2324 | orf19.5487  | CDC46       | 1.0  | 1.0  | 1.0  | -1.0 | YLR274W | CDC46  | 1.0 | -1.1 | 1.1  | 1.2  | cell division control protein (by homology)                             |
| CA2325 | orf19.5488  | IPF10977    | 1.0  | -1.1 | -1.0 | -1.0 | YLR281C |        | 1.0 | -1.7 | -2.0 | -1.9 | unknown function                                                        |
| CA2327 | orf19.11972 | IPF4782     | 1.0  | 1.4  | 2.2  | 1.7  | YBR187W |        | 1.0 | -1.4 | -1.3 | 1.0  | probable membrane protein (by homology)                                 |
| CA2328 | orf19.11973 | MED8        | -1.1 | -1.1 | 1.1  | -1.0 | YBR193C | MED8   | 1.0 | -1.2 | -1.4 | -1.1 | transcriptional regulation mediator (by homology)                       |
| CA2330 | orf19.4499  | RIM2        | -1.0 | -1.1 | 1.2  | 1.1  | YBR192W | RIM2   | 1.0 | 1.0  | -1.1 | 1.0  | mitochondrial carrier protein (by homology)                             |
| CA2331 | orf19.4502  | MOT1        | -1.1 | 1.1  | -1.3 | -1.1 | YPL082C | MOT1   | 1.0 | -1.3 | -1.1 | -1.1 | transcriptional accessory protein                                       |
| CA2336 | orf19.2353  | F13383.53EC | -1.1 | -1.1 | -1.2 | -1.1 | YOR086C |        | 1.0 | -1.6 | -1.3 | -1.4 | unknown function, internal fragment                                     |
| CA2337 | orf19.2352  | IPF13379    | -1.0 | -1.0 | 1.0  | 1.1  | YGR031W |        | 1.0 | -1.7 | -1.4 | -1.5 | unknown function                                                        |
| CA2338 | orf19.2351  | NIT3        | 1.1  | -1.1 | -1.0 | -1.0 | YLR351C | NIT3   | 1.0 | 1.2  | 1.2  | 1.2  | nitrilase (by homology)                                                 |
| CA2341 | orf19.2346  | IPF13838    | -1.1 | 1.0  | 1.0  | -1.0 | YPL222W |        | 1.0 | -1.2 | -1.4 | -1.7 | unknown function                                                        |
| CA2343 | orf19.2343  | IPF8671     | -1.0 | 1.0  | 1.0  | -1.0 | YCL008C | STP22  | 1.0 | -1.1 | 1.0  | 1.1  | unknown function                                                        |
| CA2344 | orf19.2342  | SFT2        | 1.2  | 1.2  | 1.7  | 1.4  | YBL102W | SFT2   | 1.0 | -1.0 | -1.2 | -1.2 | similar to Saccharomyces cerevisiae Sft2p suppressor of SED5 thermos    |
| CA2345 | orf19.2341  | HNT1        | 1.3  | 1.2  | 1.2  | 1.1  | YDL125C | HNT1   | 1.0 | 1.2  | 1.3  | 1.1  | similarity to protein kinase C inhibitor-I (by homology)                |
| CA2346 | orf19.3753  | SEF1        | 1.1  | 1.0  | 1.0  | 1.0  | YBL066C | SEF1   | 1.0 | -1.3 | -1.4 | -1.4 | Putative transcription factor1                                          |
| CA2347 | orf19.3752  | RAD51       | 1.1  | 1.2  | 1.3  | 1.0  | YER095W | RAD51  | 1.0 | -1.1 | -1.2 | -1.3 | DNA repair protein by homology                                          |
| CA2348 | orf19.3751  | IPF12811    | 1.1  | -1.1 | -1.1 | -1.0 | YOR233W | KIN4   | 1.0 | -1.8 | -1.8 | -1.7 | putative serine/threonine kinase                                        |
| CA2349 | orf19.3749  | IFC3        | 1.0  | 1.1  | 1.0  | 1.0  | YPR194C | OPT2   | 1.0 | -1.1 | 1.1  | -1.1 | Unknown function                                                        |
| CA2351 | orf19.4420  | IPF19947    | 1.1  | 1.0  | 1.2  | 1.0  | YBL014C | RRN6   | 1.0 | -1.2 | -1.6 | -1.2 | unknown function                                                        |
| CA2352 | orf19.4418  | FMT1        | -1.0 | 1.0  | 1.1  | 1.0  | YBL013W | FMT1   | 1.0 | 1.1  | 1.0  | 1.1  | Methionyl-tRNA Transformylase (by homology)                             |
| CA2353 | orf19.4416  | VPS13       | 1.1  | 1.0  | 1.0  | -1.0 | YLL040C | VPS13  | 1.0 | -2.2 | -2.5 | -2.7 | involved in regulating membrane traffic (by homology)                   |
| CA2357 | orf19.4894  | IPF8957     | -1.1 | -1.0 | -1.1 | -1.1 | YER010C |        | 1.0 | -1.1 | -1.2 | -1.3 | unknown function                                                        |
| CA2359 | orf19.4896  | IPF8952     | -1.1 | -1.1 | -1.1 | -1.0 | YJL148W | RPA34  | 1.0 | 1.4  | 1.5  | 2.1  | similar to Saccharomyces cerevisiae Rpa34p nonessential component of    |
| CA2360 | orf19.4897  | IPF8951     | 1.0  | 1.0  | 1.0  | -1.0 | YJL145W |        | 1.0 | -2.5 | -1.7 | -1.6 | unknown function                                                        |
| CA2361 | orf19.12363 | IPF8950     | -1.0 | 1.1  | 1.1  | 1.1  | YER004W |        | 1.0 | 1.2  | 1.2  | 1.2  | unknown function                                                        |
| CA2363 | orf19.1285  | IPF10590    | 1.0  | 1.1  | -1.0 | 1.1  | YPR091C |        | 1.0 | -1.2 | 1.1  | -1.1 | unknown function                                                        |
| CA2364 | orf19.8870  | MEC1        | -1.2 | -1.0 | -1.2 | -1.2 | YBR136W | MEC1   | 1.0 | 1.2  | 1.1  | 1.0  | cell cycle checkpoint protein (by homology)                             |
| CA2365 | orf19.1282  | CKS1        | 1.1  | -1.0 | 1.0  | -1.0 | YBR135W | CKS1   | 1.0 | 1.1  | 1.2  | 1.3  | cyclin-dependent kinases regulatory subunit (by homology)               |
| CA2366 | orf19.1281  | IPF10373    | 1.0  | -1.0 | 1.0  | -1.0 | YNL245C |        | 1.0 | -1.0 | -1.0 | -1.2 | unknown function                                                        |
| CA2367 | orf19.8867  | SUI1        | 1.1  | 1.1  | 1.3  | 1.2  | YNL244C | SUI1   | 1.0 | 1.2  | 1.1  | 1.4  | translation initiation factor 3 (eIF3) (by homology)                    |



|        |             |                    |      |      |      |      |         |               |     |      |      |      |                                                                                      |
|--------|-------------|--------------------|------|------|------|------|---------|---------------|-----|------|------|------|--------------------------------------------------------------------------------------|
| CA2368 | orf19.1839  | <i>RPA190</i>      | -1.2 | 1.1  | -1.1 | -1.0 | YOR341W | <i>RPA190</i> | 1.0 | -1.5 | 1.4  | 2.0  | DNA-directed RNA polymerase I (by homology)                                          |
| CA2369 | orf19.1837  | <i>TBP1</i>        | 1.1  | 1.2  | 1.1  | 1.1  | YER148W | <i>SPT15</i>  | 1.0 | 1.3  | 1.7  | 1.9  | TATA-binding protein (by homology)                                                   |
| CA2370 | orf19.1836  | <i>APN2</i>        | -1.0 | -1.0 | -1.1 | 1.0  | YBL019W | <i>APN2</i>   | 1.0 | -1.1 | -1.1 | -1.1 | AP endonuclease, exonuclease III homologue (by homology)                             |
| CA2371 | orf19.1835  | <i>IPF10333</i>    | -1.0 | -1.0 | -1.1 | -1.1 | YER149C | <i>PEA2</i>   | 1.0 | -1.2 | -1.0 | -1.1 | unknown function                                                                     |
| CA2373 | orf19.1833  | <i>CBF5</i>        | -1.2 | -1.1 | 1.1  | 1.1  | YLR175W | <i>CBF5</i>   | 1.0 | 1.2  | 1.4  | 2.0  | centromere/ microtubule binding protein                                              |
| CA2374 | orf19.9390  | <i>FCY23</i>       | 1.1  | -1.0 | 1.1  | 1.0  | YGL186C |               | 1.0 | -1.4 | -1.2 | -1.0 | Putative purine-cytosine transport protein                                           |
| CA2375 | orf19.2211  | <i>IPF15504</i>    | -1.0 | -1.0 | -1.1 | 1.2  | YGL138C |               | 1.0 | -1.2 | -1.6 | -1.3 | unknown function                                                                     |
| CA2376 | orf19.2213  | <i>IPF15506</i>    | -1.1 | -1.1 | -1.1 | 1.0  | YGR042W |               | 1.0 | -1.7 | -1.0 | 1.1  | unknown function                                                                     |
| CA2377 | orf19.2214  | <i>MRPL7</i>       | 1.0  | 1.0  | -1.1 | -1.0 | YDR237W | <i>MRPL7</i>  |     |      |      |      | Ribosomal protein of the large subunit, mitochondrial (by homology)                  |
| CA2378 | orf19.2215  | <i>GLE1</i>        | -1.1 | -1.1 | -1.1 | -1.1 | YDL207W | <i>GLE1</i>   | 1.0 | 1.2  | 1.4  | 1.4  | RNA export mediator (by homology)                                                    |
| CA2379 | orf19.2216  | <i>IPF4073</i>     | -1.1 | 1.0  | -1.2 | -1.0 | YMR076C | <i>PDS5</i>   | 1.0 | -1.6 | -1.2 | -1.3 | similar to <i>Saccharomyces cerevisiae</i> CaPds5p regulation of dissociation        |
| CA2384 | orf19.2615  | <i>MDL1</i>        | -1.1 | -1.1 | -1.1 | -1.1 | YLR188W | <i>MDL1</i>   | 1.0 | -1.4 | -1.2 | -1.1 | ATP-DEPENDENT PERMEASE                                                               |
| CA2385 | orf19.2614  | <i>RSR1.3</i>      | -1.0 | -1.1 | -1.1 | -1.0 | YGR152C | <i>RSR1</i>   | 1.0 | 1.1  | 1.1  | -1.0 | GTP-binding protein, 3-prime end                                                     |
| CA2386 | orf19.2613  | <i>ECM41.3</i>     | -1.1 | -1.2 | -1.2 | -1.2 | YKR076W | <i>ECM4</i>   | 1.0 | -1.1 | -1.1 | -1.6 | involved in cell wall biogenesis and architecture, 3-prime end (by homology)         |
| CA2388 | orf19.2611  | <i>MCM6</i>        | -1.3 | -1.1 | -1.3 | -1.2 | YGL201C | <i>MCM6</i>   | 1.0 | -1.3 | -1.2 | -1.4 | component of MCM initiator complex involved in DNA replication (by homology)         |
| CA2390 | orf19.2609  | <i>CET1</i>        | -1.0 | -1.0 | -1.0 | -1.0 | YPL228W | <i>CET1</i>   | 1.0 | 1.1  | 1.1  | 1.2  | mRNA 5'-triphosphatase (capping enzyme, beta subunit)                                |
| CA2393 | orf19.11018 | <i>RHO3</i>        | 1.3  | 1.4  | 1.7  | 1.5  | YIL118W | <i>RHO3</i>   | 1.0 | -1.4 | -1.4 | -1.3 | GTP-binding protein of the rho family                                                |
| CA2395 | orf19.3536  | <i>IPF6425</i>     | 1.0  | -1.0 | -1.0 | 1.0  | YOR320C |               | 1.0 | 1.1  | 1.1  | -1.3 | unknown function                                                                     |
| CA2396 | orf19.3537  | <i>IPF6428</i>     | -1.0 | 1.0  | -1.0 | -1.0 | YKL086W |               | 1.0 | -1.4 | -1.7 | -1.8 | unknown function                                                                     |
| CA2398 | orf19.3539  | <i>IPF6431</i>     | 1.1  | 1.0  | -1.0 | -1.0 | YBR141C |               | 1.0 | -1.2 | -1.1 | 1.3  | unknown function                                                                     |
| CA2399 | orf19.3540  | <i>MAK5</i>        | -1.1 | -1.2 | -1.2 | -1.2 | YBR142W | <i>MAK5</i>   | 1.0 | -1.1 | 1.1  | 1.3  | ATP-dependent RNA helicase (by homology)                                             |
| CA2400 | orf19.3541  | <i>SUP45</i>       | -1.3 | -1.2 | -1.0 | -1.1 | YBR143C | <i>SUP45</i>  | 1.0 | -1.5 | -1.1 | 1.1  | Translational release factor (by homology)                                           |
| CA2401 | orf19.3542  | <i>LEM3</i>        | -1.1 | -1.1 | -1.2 | -1.1 | YNL323W | <i>LEM3</i>   | 1.0 | -1.2 | 1.2  | -1.1 | cell division cycle mutant (by homology)                                             |
| CA2403 | orf19.3544  | <i>IPF6438</i>     | 1.0  | -1.3 | -1.3 | -1.2 | YML131W |               | 1.0 | -1.3 | -1.4 | -2.0 | unknown function                                                                     |
| CA2406 | orf19.300   | <i>AIP2</i>        | -1.2 | -1.2 | -1.3 | -1.3 | YDL178W | <i>AIP2</i>   | 1.0 | 1.2  | 1.4  | 1.1  | actin interacting protein 2 (by homology)                                            |
| CA2407 | orf19.299   | <i>ECM14</i>       | -1.1 | 1.1  | 1.1  | 1.0  | YHR132C | <i>ECM14</i>  | 1.0 | 1.0  | 1.1  | 1.0  | carboxypeptidase involved in cell wall biogenesis and architecture (by homology)     |
| CA2409 | orf19.291   | <i>IPF19948</i>    | 1.2  | -1.0 | -1.0 | 1.0  | YHR134W | <i>WSS1</i>   | 1.0 | -1.2 | 1.0  | -1.1 | unknown function                                                                     |
| CA2414 | orf19.4479  | <i>IPF13756.3F</i> | -1.5 | -1.5 | -1.5 | -1.4 | YJL010C |               | 1.0 | -1.2 | -1.4 | -1.2 | unknown function, 3-prime end                                                        |
| CA2415 | orf19.4478  | <i>MSD1</i>        | -1.4 | -1.2 | -1.5 | -1.3 | YPL104W | <i>MSD1</i>   | 1.0 | -1.2 | -1.3 | -1.4 | Aspartyl-tRNA synthetase, mitochondrial.                                             |
| CA2418 | orf19.4475  | <i>MNT4</i>        | -1.0 | 1.0  | -1.0 | 1.0  | YBR199W | <i>KTR4</i>   | 1.0 | 1.2  | 1.1  | 1.0  | putative mannosyltransferase                                                         |
| CA2419 | orf19.4474  | <i>IPF14379</i>    | -1.0 | 1.1  | -1.0 | -1.0 | YNL155W |               | 1.0 | 1.2  | 1.6  | 1.5  | unknown function                                                                     |
| CA2420 | orf19.4473  | <i>SPC19</i>       | 1.0  | 1.0  | -1.0 | 1.0  | YDR201W | <i>SPC19</i>  | 1.0 | 1.2  | 1.1  | 1.1  | spindle pole body protein (by homology)                                              |
| CA2421 | orf19.4471  | <i>IPF14998</i>    | 1.0  | 1.1  | 1.1  | 1.0  | YDR200C |               | 1.0 | -1.3 | -1.2 | -1.3 | unknown function                                                                     |
| CA2423 | orf19.11949 | <i>SDH41</i>       | -1.0 | -1.5 | -1.3 | -1.2 | YDR178W | <i>SDH4</i>   | 1.0 | -1.5 | -1.2 | -2.2 | succinate dehydrogenase membrane anchor subunit for <i>sdh2p</i> (by homology)       |
| CA2425 | orf19.10912 | <i>IPF9907</i>     | 1.1  | 1.1  | 1.5  | 1.1  | YCR067C | <i>SED4</i>   | 1.0 | -1.1 | 1.0  | 1.1  | similar to <i>Saccharomyces cerevisiae</i> Sed4 protein of the endoplasmic reticulum |
| CA2426 | orf19.3407  | <i>IPF9901</i>     | -1.1 | 1.0  | -1.0 | -1.0 | YCR066W | <i>RAD18</i>  | 1.0 | -1.1 | -1.1 | -1.2 | similar to <i>Saccharomyces cerevisiae</i> rad18p DNA repair protein (by homology)   |
| CA2427 | orf19.3406  | <i>IPF9898</i>     | -1.0 | 1.0  | 1.0  | -1.0 | YHL008C |               | 1.0 | -1.4 | -1.3 | -1.3 | probable formate dehydrogenase (by homology)                                         |
| CA2431 | orf19.3401  | <i>IPF12951</i>    | -1.0 | 1.1  | 1.0  | 1.0  | YDR486C | <i>VPS60</i>  | 1.0 | -1.1 | -1.1 | -1.0 | unknown function                                                                     |
| CA2432 | orf19.3400  | <i>COQ3</i>        | 1.1  | 1.0  | 1.1  | -1.0 | YOL096C | <i>COQ3</i>   | 1.0 | 1.2  | 1.1  | 1.0  | 3,4-dihydroxy-5-hexaprenylbenzoate methyltransferase                                 |
| CA2433 | orf19.3399  | <i>IPF12959</i>    | 1.0  | 1.1  | -1.0 | -1.0 | YDR485C |               | 1.0 | -1.2 | -1.2 | -1.1 | unknown function                                                                     |
| CA2435 | orf19.10898 | <i>IPF9483</i>     | 1.1  | 1.1  | 1.2  | 1.1  | YHR048W |               | 1.0 | -1.1 | 1.1  | 1.1  | probable permease (by homology)                                                      |
| CA2436 | orf19.2200  | <i>IPF5500</i>     | -1.1 | -1.1 | -1.1 | -1.1 | YKR044W |               | 1.0 | -1.9 | -1.6 | -1.4 | unknown function                                                                     |
| CA2437 | orf19.2199  | <i>PHO86</i>       | -1.0 | -1.1 | -1.1 | -1.1 | YJL117W | <i>PHO86</i>  | 1.0 | -1.1 | -1.1 | 1.0  | inorganic phosphate transporter by homology                                          |
| CA2440 | orf19.2196  | <i>IPF7513</i>     | -1.0 | -1.0 | -1.0 | 1.0  | YGL110C |               | 1.0 | 1.0  | 1.1  | 1.4  | unknown function                                                                     |
| CA2441 | orf19.2194  | <i>APM4</i>        | 1.0  | -1.0 | 1.1  | -1.0 | YOL062C | <i>APM4</i>   | 1.0 | 1.1  | 1.1  | 1.1  | AP-2 complex subunit, mu2 subunit (by homology)                                      |
| CA2442 | orf19.2193  | <i>PRS5</i>        | -1.1 | -1.3 | -1.3 | -1.4 | YOL061W | <i>PRS5</i>   | 1.0 | 1.0  | 1.2  | 1.7  | Phosphoribosylpyrophosphate synthetase (ribose-phosphate pyrophosphorylation)        |
| CA2446 | orf19.5504  | <i>IPF2582</i>     | -1.0 | 1.0  | 1.0  | 1.0  | YKL098W |               | 1.0 | 1.2  | -1.0 | -1.0 | unknown function                                                                     |
| CA2447 | orf19.5505  | <i>HIS7</i>        | -1.4 | -1.6 | -2.0 | -1.5 | YBR248C | <i>HIS7</i>   | 1.0 | -1.2 | -1.2 | 1.2  | Histidine biosynthesis                                                               |
| CA2448 | orf19.5506  | <i>PLC1</i>        | -1.1 | -1.1 | -1.1 | -1.1 | YPL268W | <i>PLC1</i>   | 1.0 | 1.0  | 1.2  | 1.2  | 1-phosphatidylinositol-4,5-bisphosphate phosphodiesterase                            |
| CA2449 | orf19.5507  | <i>ENP1</i>        | 1.0  | -1.1 | -1.1 | -1.1 | YBR247C | <i>ENP1</i>   | 1.0 | -1.1 | -1.1 | 1.1  | Essential nuclear protein (by homology)                                              |
| CA2453 | orf19.10995 | <i>IPF9950</i>     | 1.0  | -1.1 | -1.3 | -1.2 | YKR090W |               | 1.0 | -1.4 | -1.5 | -1.6 | unknown function                                                                     |
| CA2454 | orf19.3504  | <i>RPL23B.3</i>    | 1.4  | -1.0 | 1.1  | 1.4  | YER117W | <i>RPL23B</i> | 1.0 | 1.9  | 2.0  | 2.5  | ribosomal protein L23.e, 3-prime end (by homology)                                   |
| CA2455 | orf19.3505  | <i>IPF12228</i>    | -1.2 | 1.1  | -1.2 | 1.0  | YNL047C |               | 1.0 | -1.1 | 1.5  | 1.6  | unknown function                                                                     |
| CA2456 | orf19.3506  | <i>DBR1</i>        | -1.1 | -1.0 | -1.0 | -1.0 | YKL149C | <i>DBR1</i>   | 1.0 | 1.5  | 1.3  | 1.6  | lariat-debranching enzyme (by homology)                                              |
| CA2457 | orf19.3507  | <i>MCR1</i>        | -1.1 | -1.6 | -1.5 | -1.2 | YKL150W | <i>MCR1</i>   | 1.0 | 1.3  | 1.3  | 1.2  | NADH-cytochrome-b5 reductase (by homology)                                           |
| CA2458 | orf19.3508  | <i>IPF12233</i>    | 1.0  | -1.1 | -1.0 | -1.0 | YKL151C |               | 1.0 | 1.3  | 1.3  | -1.3 | unknown function                                                                     |
| CA2461 | orf19.1791  | <i>MAK11</i>       | -1.0 | -1.1 | -1.1 | 1.0  | YKL021C | <i>MAK11</i>  | 1.0 | -1.1 | 1.1  | 1.1  | involved in cell growth and replication of M1 dsRNA virus (by homology)              |
| CA2462 | orf19.1792  | <i>CDC16</i>       | 1.2  | 1.1  | 1.2  | 1.2  | YKL022C | <i>CDC16</i>  | 1.0 | -1.3 | -1.4 | -1.3 | subunit of anaphase-promoting complex (by homology)                                  |
| CA2463 | orf19.1793  | <i>IPF8730</i>     | -1.0 | 1.0  | -1.0 | -1.0 | YGR223C |               | 1.0 | -1.1 | 1.5  | 1.0  | unknown function                                                                     |
| CA2465 | orf19.1795  | <i>IPF8726</i>     | 1.0  | -1.1 | 1.2  | 1.0  | YLL013C | <i>PUF3</i>   | 1.0 | -1.1 | -1.2 | -1.2 | unknown function                                                                     |
| CA2467 | orf19.1796  | <i>IPF8724</i>     | 1.0  | -1.0 | -1.0 | -1.1 | YPL113C |               | 1.0 | -1.3 | -1.3 | -1.3 | unknown function                                                                     |

|        |             |            |      |      |      |      |         |           |     |      |      |      |                                                                             |
|--------|-------------|------------|------|------|------|------|---------|-----------|-----|------|------|------|-----------------------------------------------------------------------------|
| CA2471 | orf19.2873  | TOP2       | -1.1 | -1.1 | -1.2 | -1.1 | YNL088W | TOP2      | 1.0 | -1.5 | -1.1 | 1.1  | Topoisomerase II                                                            |
| CA2473 | orf19.2876  | CBF1       | -1.2 | 1.4  | 1.2  | 1.2  | YJR060W | CBF1      | 1.0 | -1.4 | -1.5 | -1.5 | putative centromere binding factor 1                                        |
| CA2474 | orf19.2877  | PDC11      | -1.1 | 9.2  | 6.4  | 9.7  | YLR044C | PDC1      | 1.0 | 1.9  | 3.7  | 4.9  | Pyruvate decarboxylase (by homology)                                        |
| CA2480 | orf19.10718 | CCT7       | -1.2 | -1.1 | -1.2 | -1.2 | YJL111W | CCT7      | 1.0 | -1.1 | 1.5  | 1.5  | component of chaperonin-containing T-complex (by homology)                  |
| CA2481 | orf19.3205  | MRPL36     | -1.0 | -1.2 | -1.2 | -1.1 | YBR122C | MRPL36    | 1.0 | 1.1  | -1.1 | -1.1 | ribosomal protein YmL36 precursor, mitochondrial (by homology)              |
| CA2483 | orf19.3203  | IPF19758   | -1.2 | -1.3 | -1.2 | -1.1 | YJL204C |           | 1.0 | -1.4 | -1.1 | -1.1 | unknown function                                                            |
| CA2486 | orf19.10712 | IPF9851    | -1.1 | -1.1 | -1.1 | -1.1 | YCR040W | MATALPHA1 | 1.0 | -1.6 | -1.8 | -1.5 | unknown function                                                            |
| CA2487 | orf19.10711 | PIK1       | -1.0 | 1.0  | -1.0 | -1.0 | YNL267W | PIK1      | 1.0 | 1.1  | -1.1 | 1.1  | phosphatidylinositol 4-kinase                                               |
| CA2490 | orf19.4044  | MUM2       | -1.0 | 1.4  | 1.8  | 1.4  | YBR057C | MUM2      | 1.0 | -1.1 | -1.1 | -1.1 | ubiquitin C-terminal hydrolase (by homology)                                |
| CA2492 | orf19.4045  | IPF7224    | -1.0 | 1.1  | 1.1  | -1.0 | YDR206W | EBS1      | 1.0 | -1.2 | -1.2 | -1.1 | putative telomere elongation protein (by homology)                          |
| CA2494 | orf19.4051  | HTS1       | -1.1 | -1.0 | 1.1  | -1.0 | YPR033C | HTS1      | 1.0 | 1.2  | 1.7  | 1.9  | histidine tRNA synthetase (by homology)                                     |
| CA2497 | orf19.5580  | TEL1.3EOC  | 1.0  | -1.1 | -1.3 | -1.2 | YBL088C | TEL1      | 1.0 | 1.3  | 1.4  | 1.2  | Putative phosphatidylinositol kinase involved in controlling telomere lengt |
| CA2498 | orf19.5584  | VPS181     | -1.1 | -1.1 | -1.1 | -1.0 | YLR148W | PEP3      | 1.0 | -1.4 | -1.1 | -1.0 | vacuolar membrane protein                                                   |
| CA2500 | orf19.5586  | FIG4       | -1.0 | -1.0 | -1.0 | -1.0 | YNL325C | FIG4      | 1.0 | 1.0  | 1.2  | 1.0  | suppressor of sac1 mutation (by homology)                                   |
| CA2501 | orf19.5587  | IPF6812    | 1.0  | -1.0 | -1.0 | -1.0 | YLR224W |           | 1.0 | -1.0 | -1.1 | 1.1  | unknown function                                                            |
| CA2503 | orf19.5592  | IPF6803.5F | -1.0 | 1.0  | 1.0  | -1.0 | YAL045C |           | 1.0 | -2.1 | -1.7 | -1.2 | unknown function, 5-prime end                                               |
| CA2505 | orf19.5595  | IPF6796    | -1.3 | -1.2 | -1.6 | -1.2 | YBR130C | SHE3      | 1.0 | -2.1 | -2.0 | -1.2 | unknown function                                                            |
| CA2508 | orf19.302   | BET5       | -1.0 | 1.0  | 1.2  | 1.1  | YML077W | BET5      | 1.0 | -1.1 | 1.0  | 1.1  | targeting and fusion of ER to Golgi transport vesicles (by homology)        |
| CA2509 | orf19.304   | IPF1471    | 1.1  | 1.0  | 1.1  | 1.1  | YOR378W |           | 1.0 | -1.4 | -1.3 | -1.4 | aminotriazole resistance protein (by homology)                              |
| CA2512 | orf19.307   | HFI1       | -1.0 | -1.0 | -1.1 | -1.0 | YPL254W | HFI1      | 1.0 | -1.1 | -1.1 | 1.1  | Putative transcriptional coactivator (by homology)                          |
| CA2513 | orf19.308   | SNG1       | 1.0  | 1.0  | 1.0  | -1.0 | YGR197C | SNG1      | 1.0 | -1.3 | -1.1 | -1.1 | Involved in nitroguanidine resistance (by homology)                         |
| CA2514 | orf19.313   | FUR4       | 1.0  | 1.1  | 1.1  | 1.0  | YIR028W | DAL4      | 1.0 | -1.0 | -1.0 | -1.1 | Probable uracile or allantoin permease (by homology)                        |
| CA2515 | orf19.5510  | IPF19759   | 1.0  | -1.1 | -1.1 | -1.1 | YGL133W | ITC1      | 1.0 | -1.5 | 1.4  | 1.7  | Unknown Function                                                            |
| CA2516 | orf19.5513  | IPF4301    | 1.0  | 1.0  | 1.1  | 1.0  | YAL032C | PRP45     | 1.0 | -1.8 | -2.2 | -2.1 | unknown function                                                            |
| CA2518 | orf19.5515  | CBP3       | -1.0 | 1.0  | -1.0 | -1.0 | YPL215W | CBP3      | 1.0 | 1.1  | 1.1  | -1.0 | involved in cytochrome-c reductase assembly (by homology)                   |
| CA2519 | orf19.5516  | SRP72      | -1.1 | -1.1 | -1.1 | -1.0 | YPL210C | SRP72     | 1.0 | 1.0  | 1.1  | -1.0 | signal recognition particle protein SRP72 (by homology)                     |
| CA2520 | orf19.5517  | IPF20104   | 1.2  | 2.7  | 3.9  | 2.7  | YMR318C |           | 1.0 | 1.4  | 1.8  | 1.8  | alcohol dehydrogenase (by homology)                                         |
| CA2522 | orf19.5519  | GCV1       | -1.1 | -2.0 | -2.0 | -1.6 | YDR019C | GCV1      | 1.0 | -1.3 | -1.6 | -1.7 | glycine cleavage T protein (by homology)                                    |
| CA2524 | orf19.5521  | IPF4322    | 1.1  | -1.2 | -1.2 | -1.2 | YLL027W | ISA1      | 1.0 | -1.3 | -1.4 | -1.6 | unknown function                                                            |
| CA2526 | orf19.5526  | SEC20      | -1.0 | 1.1  | 1.1  | 1.1  | YDR498C | SEC20     | 1.0 | -1.3 | -1.5 | -1.5 | secretory pathway protein                                                   |
| CA2527 | orf19.5527  | IPF4331    | -1.0 | 1.1  | -1.0 | 1.0  | YMR285C | NGL2      | 1.0 | -1.4 | -1.3 | -1.3 | unknown function                                                            |
| CA2528 | orf19.5528  | MOB1       | 1.0  | 1.0  | -1.0 | 1.0  | YIL106W | MOB1      | 1.0 | 1.0  | 1.1  | -1.0 | required for completion of mitosis                                          |
| CA2530 | orf19.3176  | IPF12782   | -1.1 | 1.0  | -1.0 | 1.0  | YNL294C |           | 1.0 | -1.3 | -1.3 | -1.2 | unknown function                                                            |
| CA2531 | orf19.3177  | RIB2       | -1.2 | -1.2 | -1.2 | -1.1 | YOL066C | RIB2      | 1.0 | -1.3 | -1.2 | 1.0  | DRAP deaminase (by homology)                                                |
| CA2532 | orf19.3178  | PRP9       | -1.1 | -1.0 | -1.1 | -1.0 | YDL030W | PRP9      | 1.0 | -1.3 | -1.2 | -1.2 | pre-mRNA splicing factor (snRNA-associated protein) (by hon                 |
| CA2533 | orf19.3180  | IPF12790   | -1.1 | -1.1 | -1.0 | 1.1  | YOL065C | INP54     | 1.0 | -1.1 | -1.0 | -1.1 | inositol polyphosphate 5-phosphatase (by homology)                          |
| CA2534 | orf19.3182  | IPF12793   | 1.1  | 1.2  | 1.5  | 1.4  | YNL255C | GIS2      | 1.0 | 1.3  | 1.8  | 1.7  | similar to Saccharomyces cerevisiae Gis2p containing seven zinc finger i    |
| CA2536 | orf19.3183  | IPF20107   | 1.1  | -1.0 | 1.0  | 1.0  | YOL111C |           | 1.0 | -1.2 | -1.2 | -1.3 | unknown function                                                            |
| CA2538 | orf19.3185  | NAT1       | -1.6 | -1.4 | -1.8 | -1.6 | YDL040C | NAT1      | 1.0 | 1.1  | 1.2  | 1.3  | Protein N-acetyltransferase subunit (by homology)                           |
| CA2542 | orf19.3190  | IPF16067   | 1.1  | 1.1  | 1.1  | -1.0 | YOL089C | HAL9      | 1.0 | 1.1  | 1.1  | 1.1  | unknown function                                                            |
| CA2543 | orf19.2828  | IPF16925   | 1.0  | 1.0  | 1.1  | 1.1  | YNL148C | ALF1      | 1.0 | -1.3 | -1.2 | -1.2 | unknown function                                                            |
| CA2544 | orf19.2829  | IPF16924   | 1.0  | 1.1  | 1.1  | 1.0  | YNL149C |           | 1.0 | -4.4 | -2.1 | -2.1 | unknown function                                                            |
| CA2545 | orf19.2830  | RRP9       | -1.1 | -1.1 | 1.0  | 1.8  | YPR137W | RRP9      | 1.0 | 1.1  | -1.0 | 1.4  | U3 small nucleolar ribonucleoprotein-associated protein involved in pre-ri  |
| CA2546 | orf19.2831  | RPC31      | 1.0  | -1.0 | 1.1  | 1.1  | YNL151C | RPC31     | 1.0 | -1.6 | -1.8 | -2.4 | DNA-directed RNA polymerase III (by homology)                               |
| CA2547 | orf19.2832  | IPF14911   | -1.2 | -1.1 | -1.2 | -1.1 | YNL152W |           | 1.0 | -1.3 | -1.4 | -1.3 | unknown function                                                            |
| CA2550 | orf19.2835  | IPF9099    | -1.0 | 1.2  | 1.1  | 1.2  | YPR180W | AOS1      | 1.0 | -1.0 | 1.2  | 1.1  | similar to Saccharomyces cerevisiae Aos1p activating enzyme for Smt3 (      |
| CA2552 | orf19.2837  | ALG5       | -1.0 | -1.1 | -1.1 | -1.0 | YPL227C | ALG5      | 1.0 | -1.0 | 1.1  | 1.1  | dolichol-P-glucose synthetase (by homology)                                 |
| CA2559 | orf19.5639  | HIS4       | -1.3 | -1.2 | -1.3 | -1.3 | YCL030C | HIS4      | 1.0 | 1.6  | 2.9  | 6.8  | Histidine biosynthesis trifunctional protein (phosphoribosyl-AMP cyclohyc   |
| CA2560 | orf19.5640  | PEX5       | -1.1 | -1.2 | -1.2 | -1.2 | YDR244W | PEX5      |     |      |      |      | peroxisomal targeting signal receptor                                       |
| CA2561 | orf19.5641  | CAR2       | -1.2 | -4.7 | -4.7 | -3.8 | YLR438W | CAR2      | 1.0 | -1.3 | -1.4 | -1.8 | ornithine aminotransferase (by homology)                                    |
| CA2563 | orf19.5643  | ECM7       | 1.0  | 1.2  | 1.4  | 1.1  | YLR443W | ECM7      | 1.0 | -1.9 | -1.5 | -1.8 | cell wall biogenesis and architecture (by homology)                         |
| CA2564 | orf19.5644  | IPF12127   | -1.0 | 1.3  | 1.6  | 1.3  | YML066C | SMA2      | 1.0 | -1.2 | -1.2 | -1.2 | unknown function                                                            |
| CA2565 | orf19.5645  | MET15      | 1.1  | 1.4  | 1.6  | 1.2  | YLR303W | MET17     | 1.0 | -3.2 | -3.6 | -5.3 | O-acetylhomoserine O-acetylserine sulphhydrylase                            |
| CA2566 | orf19.5646  | IPF12122   | -1.1 | 1.0  | 1.0  | -1.0 | YPL034W |           | 1.0 | 1.2  | 1.0  | 1.1  | unknown function                                                            |
| CA2567 | orf19.5647  | SUB2.3F    | -1.1 | -1.1 | 1.0  | -1.0 | YDL084W | SUB2      | 1.0 | -1.0 | 1.2  | 1.3  | Involved in pre-mRNA splicing, 3-prime end (by homology)                    |
| CA2570 | orf19.5650  | PRO3       | 1.1  | -1.4 | -1.6 | -1.2 | YER023W | PRO3      | 1.0 | -1.4 | -1.2 | -1.2 | delta 1-pyrroline-5-carboxylate reductase (by homology)                     |
| CA2571 | orf19.13590 | IPF13769   | 1.1  | -1.2 | -1.0 | -1.2 | YKL221W |           | 1.0 | -1.5 | -1.5 | -1.5 | unknown function                                                            |
| CA2573 | orf19.6213  | SUI2       | 1.1  | -1.1 | -1.2 | -1.1 | YJR007W | SUI2      | 1.0 | 1.2  | 1.6  | 1.9  | translation initiation factor eIF2, alpha chain (by homology)               |
| CA2574 | orf19.6214  | ATH1       | -1.0 | -1.1 | -1.2 | -1.1 | YPR026W | ATH1      | 1.0 | 1.0  | -1.2 | -1.2 | acid trehalase, vacuolar                                                    |
| CA2575 | orf19.6217  | SEC31      | 1.0  | 1.2  | -1.0 | -1.0 | YDL195W | SEC31     | 1.0 | -1.4 | -1.1 | 1.1  | Component of the COPII coat of ER-golgi vesicles (by homology).             |
| CA2577 | orf19.6220  | IPF7430    | -1.1 | -1.1 | -1.3 | -1.3 | YGR134W | CAF130    | 1.0 | -1.2 | -1.4 | -1.1 | unknown function                                                            |



|        |             |                     |      |      |      |      |         |               |     |      |      |      |                                                                                        |
|--------|-------------|---------------------|------|------|------|------|---------|---------------|-----|------|------|------|----------------------------------------------------------------------------------------|
| CA2578 |             | <i>MMD1.3</i>       | 1.6  | -1.1 | -1.2 | 1.1  | YIL051C | <i>MMF1</i>   | 1.0 | 1.0  | -1.2 | -1.2 | Maintenance of mitochondrial DNA, 3-prime end (by homology)                            |
| CA2579 |             | <i>RPL34B.3</i>     | 1.8  | 1.3  | 1.2  | 1.4  | YIL052C | <i>RPL34B</i> | 1.0 | 2.0  | 2.2  | 2.6  | Ribosomal protein L34.e, 3-prime end (by homology)                                     |
| CA2582 | orf19.4371  | <i>TAL1</i>         | -1.2 | -1.8 | -2.0 | -1.8 | YLR354C | <i>TAL1</i>   | 1.0 | 1.2  | 1.2  | 1.4  | transaldolase (by homology)                                                            |
| CA2584 | orf19.4373  | <i>IPF9440</i>      | 1.2  | 1.1  | -1.0 | 1.1  | YDR236C | <i>FMN1</i>   |     |      |      |      | similar to <i>Saccharomyces cerevisiae</i> Fmn1p riboflavin kinase (by homology)       |
| CA2585 | orf19.4374  | <i>IPF9438</i>      | -1.0 | -1.0 | -1.0 | 1.0  | YDR235W | <i>PRP42</i>  |     |      |      |      | similar to <i>Saccharomyces cerevisiae</i> Prp42p U1 snRNP associated protein          |
| CA2586 | orf19.4375  | <i>IPF9435</i>      | 1.0  | -1.1 | -1.0 | -1.0 | YLR285W |               | 1.0 | -1.3 | 1.1  | 1.3  | unknown function                                                                       |
| CA2587 |             | <i>RPS30.3</i>      | 1.2  | 1.1  | 1.1  | 1.1  | YOR182C | <i>RPS30B</i> | 1.0 | 1.4  | 1.8  | 1.8  | 40S ribosomal protein S30, 3-prime end (by homology)                                   |
| CA2592 | orf19.59    | <i>IPF18447</i>     | 1.1  | 1.0  | -1.0 | 1.0  | YBR267W |               | 1.0 | -1.5 | -1.3 | 1.0  | putative zinc-finger protein (by homology)                                             |
| CA2593 | orf19.58    | <i>RRP6</i>         | -1.1 | -1.2 | -1.4 | -1.1 | YOR001W | <i>RRP6</i>   | 1.0 | 1.2  | 1.8  | 2.1  | involved in 5.8S rRNA processing (by homology)                                         |
| CA2594 | orf19.57    | <i>IPF12824</i>     | -1.0 | 1.0  | 1.0  | 1.1  | YJL072C |               | 1.0 | 1.1  | -1.2 | -1.1 | unknown function                                                                       |
| CA2595 | orf19.56    | <i>ARG2</i>         | -1.0 | -1.0 | -1.0 | -1.0 | YJL071W | <i>ARG2</i>   | 1.0 | -1.2 | -1.3 | -1.2 | acetylglutamate synthase (by homology)                                                 |
| CA2596 | orf19.55    | <i>IPF19546</i>     | 1.4  | -1.4 | -1.0 | 1.1  | YOL002C |               | 1.0 | -1.2 | -1.1 | -1.0 | unknown function                                                                       |
| CA2599 | orf19.52    | <i>IPF11176</i>     | -1.0 | -1.0 | 1.2  | 1.1  | YPL224C | <i>MMT2</i>   | 1.0 | -1.2 | -1.0 | -1.1 | similar to <i>Saccharomyces cerevisiae</i> Mmt2p mitochondrial iron transport          |
| CA2600 | orf19.51    | <i>IPF11177</i>     | -1.3 | -1.2 | -1.4 | -1.0 | YMR012W | <i>CLU1</i>   | 1.0 | -1.1 | 1.1  | -1.1 | similar to <i>Saccharomyces cerevisiae</i> Clu1p translation initiation factor eIF     |
| CA2601 | orf19.50    | <i>IPF11181</i>     | -1.1 | -1.0 | -1.0 | 1.0  | YML088W | <i>UFO1</i>   | 1.0 | 1.2  | 1.3  | 1.4  | unknown function                                                                       |
| CA2605 | orf19.5682  | <i>SRP1</i>         | -1.0 | 1.0  | 1.2  | -1.1 | YNL189W | <i>SRP1</i>   | 1.0 | -1.2 | 1.1  | 1.4  | alpha importin by homology                                                             |
| CA2606 | orf19.5683  | <i>IPF5466</i>      | -1.0 | 1.0  | 1.0  | 1.0  | YHR140W |               | 1.0 | -1.3 | -1.3 | -1.1 | unknown function                                                                       |
| CA2607 | orf19.5684  | <i>MRPL38</i>       | 1.3  | 1.3  | 1.3  | 1.2  | YKL170W | <i>MRPL38</i> | 1.0 | -1.1 | -1.1 | -1.4 | ribosomal protein of the large subunit(L14), mitochondrial, by homology                |
| CA2608 | orf19.5685  | <i>THS1</i>         | -1.7 | -1.3 | -1.4 | -1.5 | YIL078W | <i>THS1</i>   | 1.0 | 1.3  | 1.6  | 1.7  | threonyl tRNA synthetase by homology                                                   |
| CA2609 | orf19.5689  | <i>IPF5457</i>      | 1.2  | 1.1  | 1.3  | 1.2  | YIL076W | <i>SEC28</i>  | 1.0 | -1.6 | -1.2 | -1.7 | similar to <i>Saccharomyces cerevisiae</i> sec28p epsilon-COP coatomer subunit         |
| CA2610 | orf19.5691  | <i>CDC11</i>        | -1.0 | -1.0 | 1.0  | 1.0  | YJR076C | <i>CDC11</i>  | 1.0 | -2.0 | 1.1  | 1.1  | septin by homology                                                                     |
| CA2612 | orf19.5693  | <i>GAA1</i>         | 1.1  | 1.2  | 1.4  | 1.4  | YLR088W | <i>GAA1</i>   | 1.0 | -1.4 | -1.1 | 1.0  | required for attachment of GPI anchor onto proteins by homology                        |
| CA2613 | orf19.5698  | <i>IPF5446</i>      | 1.2  | 1.0  | 1.1  | -1.0 | YDR116C |               | 1.0 | -1.1 | -1.2 | -1.1 | putative ribosomal protein (by homology)                                               |
| CA2620 | orf19.2809  | <i>IPF9496</i>      | 1.0  | -1.1 | -1.0 | -1.0 | YER024W | <i>YAT2</i>   | 1.0 | -1.5 | -1.6 | -1.1 | carnitine O-acetyltransferase (by homology)                                            |
| CA2625 | orf19.12229 | <i>IPF10919</i>     | 1.4  | 1.6  | 1.8  | 1.6  | YLR110C | <i>CCW12</i>  | 1.0 | 1.7  | 2.0  | 2.0  | Similar to Flo1p (by homology)                                                         |
| CA2626 | orf19.4764  | <i>PAN2</i>         | -1.0 | 1.0  | 1.0  | -1.0 | YGL094C | <i>PAN2</i>   | 1.0 | -1.3 | -1.3 | -1.5 | component of Pab1p-stimulated poly(A)(by homology)                                     |
| CA2627 | orf19.4763  | <i>IPF10916</i>     | 1.1  | -1.0 | 1.0  | -1.1 | YAL008W | <i>FUN14</i>  | 1.0 | -1.6 | -1.4 | -1.1 | unknown function                                                                       |
| CA2628 | orf19.12225 | <i>SIR22</i>        | 1.0  | -1.0 | 1.0  | 1.1  | YOL068C | <i>HST1</i>   | 1.0 | -1.1 | 1.1  | 1.4  | canal regulatory protein (by homology)                                                 |
| CA2629 | orf19.12224 | <i>IPF10911</i>     | 1.1  | -1.1 | -1.1 | -1.1 | YIL110W |               | 1.0 | -1.1 | 1.1  | 1.1  | unknown function                                                                       |
| CA2630 | orf19.12223 | <i>COX5A</i>        | 1.3  | -1.1 | 1.4  | 1.1  | YNL052W | <i>COX5A</i>  | 1.0 | 1.3  | 1.4  | -1.4 | cytochrome-c oxidase chain V.A precursor (by homology)                                 |
| CA2632 | orf19.4757  | <i>NAR1</i>         | 1.1  | -1.0 | -1.0 | -1.1 | YNL240C | <i>NAR1</i>   | 1.0 | 1.2  | 1.2  | 1.1  | Yeast nuclear architecture related protein (by homology)                               |
| CA2633 | orf19.4755  | <i>KEX2</i>         | -1.3 | -1.1 | -1.4 | -1.1 | YNL238W | <i>KEX2</i>   | 1.0 | 1.0  | 1.1  | 1.5  | Kexin precursor (KEX2 protease)                                                        |
| CA2634 | orf19.12218 | <i>ZWF1</i>         | -1.6 | -1.2 | -1.2 | -1.1 | YNL241C | <i>ZWF1</i>   | 1.0 | 1.5  | 1.6  | -1.0 | glucose-6-phosphate dehydrogenase (by homology)                                        |
| CA2635 | orf19.4297  | <i>CKB22</i>        | 1.0  | 1.1  | 1.1  | 1.1  | YOR039W | <i>CKB2</i>   | 1.0 | -1.2 | -1.1 | -1.1 | Casein kinase II, beta subunit (by homology)                                           |
| CA2636 | orf19.4299  | <i>MSW1</i>         | -1.0 | -1.0 | 1.0  | -1.0 | YDR268W | <i>MSW1</i>   | 1.0 | -1.1 | -1.2 | -1.3 | Mitochondrial tryptophanyl-tRNA synthetase (by homology)                               |
| CA2641 | orf19.4306  | <i>IPF2929</i>      | 1.1  | 1.1  | 1.0  | -1.0 | YJR024C |               | 1.0 | 1.1  | 1.2  | 1.2  | unknown function                                                                       |
| CA2643 | orf19.4308  | <i>HSL1</i>         | 1.0  | 1.0  | -1.1 | -1.0 | YKL101W | <i>HSL1</i>   | 1.0 | -1.3 | -1.4 | -1.4 | Ser/thr protein kinase that interacts genetically with histone mutations (by homology) |
| CA2645 | orf19.4311  | <i>YNK1</i>         | 1.4  | 1.0  | 1.1  | 1.2  | YKL067W | <i>YNK1</i>   | 1.0 | -1.4 | -1.5 | -2.2 | Nucleoside diphosphate kinase (by homology)                                            |
| CA2646 | orf19.1185  | <i>IPF13089</i>     | 1.2  | 1.0  | 1.1  | 1.0  | YNL116W |               | 1.0 | 1.0  | -1.1 | -1.1 | unknown function                                                                       |
| CA2648 | orf19.1187  | <i>IPF9062</i>      | -1.2 | 1.5  | 1.3  | 1.4  | YOR032C | <i>HMS1</i>   | 1.0 | -1.3 | -1.2 | -1.3 | unknown function                                                                       |
| CA2651 | orf19.1191  | <i>HRD3</i>         | -1.2 | -1.2 | -1.2 | -1.2 | YLR207W | <i>HRD3</i>   | 1.0 | 1.2  | 1.5  | 1.5  | involved in HMG-CoA reductase degradation (by homology)                                |
| CA2652 | orf19.1192  | <i>DNA2</i>         | -1.0 | 1.0  | -1.1 | -1.0 | YHR164C | <i>DNA2</i>   | 1.0 | -1.1 | -1.2 | -1.5 | DNA helicase (by homology)                                                             |
| CA2653 | orf19.5701  | <i>PF8472.3E0C</i>  | 1.1  | -1.0 | 1.1  | 1.0  | YLR381W |               | 1.0 | 1.0  | 1.3  | 1.4  | unknown function, 3-prime end                                                          |
| CA2654 | orf19.5702  | <i>IPF8474</i>      | 1.1  | 1.1  | 1.1  | 1.0  | YOR093C |               | 1.0 | -1.4 | -1.6 | -1.3 | unknown function                                                                       |
| CA2655 | orf19.5704  | <i>IPF8477</i>      | 1.1  | -1.1 | -1.0 | -1.0 | YGR150C |               | 1.0 | 1.1  | 1.2  | 1.3  | unknown function                                                                       |
| CA2656 | orf19.5705  | <i>NAM2</i>         | -1.1 | -1.3 | -1.5 | -1.3 | YLR382C | <i>NAM2</i>   | 1.0 | -1.4 | -1.2 | -1.4 | mitochondrial leucine--tRNA ligase (by homology)                                       |
| CA2658 | orf19.5711  | <i>IPF8105</i>      | -1.0 | -1.2 | -1.2 | -1.2 | YLR380W | <i>CSR1</i>   | 1.0 | -1.3 | -1.3 | -1.1 | unknown function                                                                       |
| CA2662 | orf19.3553  | <i>IPF17139</i>     | -1.0 | 1.1  | 1.1  | -1.0 | YKR081C |               | 1.0 | 1.3  | 1.4  | 2.1  | unknown function                                                                       |
| CA2663 | orf19.3552  | <i>NUP133</i>       | -1.7 | -1.5 | -2.1 | -1.7 | YKR082W | <i>NUP133</i> | 1.0 | -1.3 | -1.1 | -1.2 | nuclear pore protein (by homology)                                                     |
| CA2664 | orf19.3551  | <i>IPF13370</i>     | -1.1 | -1.0 | -1.0 | -1.0 | YKR083C | <i>DAD2</i>   | 1.0 | -2.1 | -2.2 | -2.0 | unknown function                                                                       |
| CA2665 | orf19.3549  | <i>CDC21</i>        | 1.0  | -1.1 | 1.0  | 1.0  | YOR074C | <i>CDC21</i>  | 1.0 | -1.3 | 1.6  | 1.2  | thymidylate synthase (by homology)                                                     |
| CA2666 | orf19.3548  | <i>IPF16995</i>     | 1.3  | 1.0  | -1.0 | 1.1  | YBL095W |               | 1.0 | 1.3  | 1.2  | 1.2  | unknown function                                                                       |
| CA2667 | orf19.3547  | <i>IPF16996</i>     | -1.2 | -1.1 | -1.1 | -1.0 | YDR496C | <i>PUF6</i>   | 1.0 | -1.2 | -1.1 | 1.1  | unknown function                                                                       |
| CA2668 | orf19.3546  | <i>IPF17553</i>     | -1.2 | -1.4 | -1.5 | -1.3 | YJL210W | <i>PEX2</i>   | 1.0 | 1.1  | 1.0  | -1.8 | similar to <i>Saccharomyces cerevisiae</i> Pex2p peroxisomal protein (by homology)     |
| CA2670 | orf19.5500  | <i>MAK16</i>        | 1.0  | -1.1 | -1.0 | 1.0  | YAL025C | <i>MAK16</i>  | 1.0 | -1.1 | 1.0  | 1.2  | nuclear viral propagation protein (by homology)                                        |
| CA2675 | orf19.5493  | <i>GSP1</i>         | -1.2 | -1.3 | -1.3 | -1.2 | YLR293C | <i>GSP1</i>   | 1.0 | 1.2  | 1.7  | 2.3  | GTP-binding protein (by homology)                                                      |
| CA2676 | orf19.5492  | <i>YHC1</i>         | -1.0 | -1.0 | 1.0  | 1.1  | YLR298C | <i>YHC1</i>   | 1.0 | -1.0 | 1.2  | 1.1  | SMALL NUCLEAR RIBONUCLEOPROTEIN C (by homology)                                        |
| CA2677 |             | <i>ATP14.EXON.2</i> | 1.3  | -1.0 | -1.0 | 1.1  | YLR295C | <i>ATP14</i>  | 1.0 | -1.2 | -1.1 | -1.4 | F1FO-ATPase complex, subunit h, exon 2 (by homology)                                   |
| CA2679 | orf19.2568  | <i>IFU5</i>         | 1.1  | 1.0  | 1.1  | -1.1 | YFL010C |               | 1.0 | 1.1  | 1.2  | 1.2  | Unknown function                                                                       |
| CA2681 | orf19.2571  | <i>SEC4</i>         | -1.0 | 1.0  | 1.3  | 1.0  | YFL005W | <i>SEC4</i>   | 1.0 | -1.7 | -2.1 | -3.5 | GTP-binding protein                                                                    |
| CA2682 | orf19.2573  | <i>FRS1</i>         | -1.3 | -1.3 | -1.4 | -1.3 | YLR060W | <i>FRS1</i>   | 1.0 | 1.2  | 1.7  | 1.8  | Phenylalanyl-tRNA synthetase                                                           |

|        |             |                   |      |      |      |      |         |               |     |      |      |      |                                                                                 |
|--------|-------------|-------------------|------|------|------|------|---------|---------------|-----|------|------|------|---------------------------------------------------------------------------------|
| CA2683 | orf19.2574  | <i>IFU4</i>       | -1.2 | -1.0 | -1.2 | -1.1 | YFL034W |               | 1.0 | -1.1 | 1.2  | -1.1 | Unknown function                                                                |
| CA2684 | orf19.2575  | <i>IFU3</i>       | -1.0 | 1.0  | 1.0  | -1.0 | YLR063W |               | 1.0 | -1.0 | 1.1  | 1.3  | Unknown function                                                                |
| CA2685 | orf19.2579  | <i>MSH4</i>       | -1.0 | 1.0  | -1.1 | -1.0 | YFL003C | <i>MSH4</i>   | 1.0 | -1.4 | -1.4 | -1.1 | DNA mismatch repair protein                                                     |
| CA2686 | orf19.2580  | <i>HST2</i>       | -1.1 | 1.0  | -1.1 | 1.0  | YPL015C | <i>HST2</i>   | 1.0 | 1.2  | 1.6  | 1.2  | Transcription regulatory protein                                                |
| CA2689 | orf19.2582  | <i>IFU2</i>       | -1.1 | -1.0 | -1.2 | -1.1 | YPL009C |               | 1.0 | -1.5 | -1.3 | -1.4 | Unknown function                                                                |
| CA2693 | orf19.10247 | <i>IPF9173.5F</i> | 1.0  | 1.0  | 1.1  | 1.1  | YPL120W | <i>VPS30</i>  | 1.0 | 1.1  | 1.3  | 1.2  | similar to <i>Saccharomyces cerevisiae</i> Vps30p involved in vacuolar protein  |
| CA2695 | orf19.2735  | <i>IPF9070</i>    | 1.0  | -1.0 | 1.0  | 1.0  | YLR105C | <i>SEN2</i>   | 1.0 | -1.4 | -1.5 | -1.4 | similar to <i>Saccharomyces cerevisiae</i> Sen2p tRNA splicing endonuclease     |
| CA2696 | orf19.2736  | <i>IPF9169</i>    | 1.0  | 1.3  | 1.9  | 1.5  | YER159C | <i>BUR6</i>   | 1.0 | 1.2  | 1.1  | 1.3  | similar to <i>Saccharomyces cerevisiae</i> Bur6p functional homolog of human    |
| CA2697 | orf19.2737  | <i>IPF9167</i>    | -1.3 | -1.2 | -1.3 | -1.3 | YDR109C |               | 1.0 | 1.1  | 1.2  | 1.3  | unknown function                                                                |
| CA2698 | orf19.10252 | <i>SUL1</i>       | -1.1 | 1.0  | 1.1  | 1.0  | YLR092W | <i>SUL2</i>   | 1.0 | -1.6 | -1.7 | -1.6 | High-affinity sulfate transport protein (by homology)                           |
| CA2699 | orf19.10253 | <i>RLF2</i>       | 1.0  | -1.0 | -1.0 | -1.1 | YPR018W | <i>RLF2</i>   | 1.0 | -1.0 | -1.0 | 1.1  | chromatin assembly complex, subunit p90 (by homology)                           |
| CA2702 | orf19.10260 | <i>EMP70</i>      | 1.2  | 1.2  | 1.5  | 1.2  | YLR083C | <i>EMP70</i>  | 1.0 | -1.1 | -1.0 | 1.3  | Endosomal protein (by homology)                                                 |
| CA2705 | orf19.4657  | <i>NEM1</i>       | 1.1  | -1.1 | -1.0 | 1.0  | YHR004C | <i>NEM1</i>   | 1.0 | 1.1  | 1.3  | 1.5  | required for nuclear morphology (by homology)                                   |
| CA2707 | orf19.4659  | <i>IPF11003</i>   | -1.0 | -1.1 | -1.1 | -1.0 | YJL203W | <i>PRP21</i>  | 1.0 | -1.7 | -1.4 | -1.3 | by homology pre-mrna splicing factor                                            |
| CA2708 | orf19.4660  | <i>RPS6A</i>      | -1.2 | -1.5 | -1.7 | -1.3 | YPL090C | <i>RPS6A</i>  | 1.0 | 1.9  | 2.3  | 3.4  | ribosomal protein S6 (by homology)                                              |
| CA2709 | orf19.4662  | <i>IPF4828</i>    | 1.1  | 1.0  | 1.0  | -1.0 | YPL089C | <i>RLM1</i>   | 1.0 | -1.0 | 1.2  | 1.2  | by homology to <i>S. cerevisiae</i> YEAST TRANSCRIPTION FACTOR RLM1             |
| CA2710 | orf19.4664  | <i>IPF7403</i>    | 1.1  | 1.1  | 1.2  | 1.1  | YMR069W |               | 1.0 | -1.6 | -1.5 | -1.7 | unknown function                                                                |
| CA2711 | orf19.8198  | <i>TFB3</i>       | 1.0  | -1.0 | -1.0 | -1.0 | YDR460W | <i>TFB3</i>   | 1.0 | -1.0 | -1.0 | -1.1 | Transcription/repair factor (by homology)                                       |
| CA2712 | orf19.8199  | <i>SPE2</i>       | 1.0  | -1.2 | -1.1 | -1.3 | YOL052C | <i>SPE2</i>   | 1.0 | 1.1  | 1.6  | 1.2  | by homology to <i>S. cerevisiae</i> adenosylmethionine decarboxylase precurs    |
| CA2715 | orf19.576   | <i>CTF8</i>       | 1.0  | 1.0  | -1.0 | -1.0 | YHR191C | <i>CTF8</i>   | 1.0 | -1.1 | -1.3 | -1.2 | putative) kinetochore protein (by homology)                                     |
| CA2716 | orf19.577   | <i>IPF7353</i>    | -1.1 | -1.3 | -1.4 | -1.2 | YDL057W |               | 1.0 | -1.1 | -1.3 | -1.2 | unknown function                                                                |
| CA2717 | orf19.8209  | <i>MSB3</i>       | 1.0  | 1.1  | 1.0  | -1.0 | YNL293W | <i>MSB3</i>   | 1.0 | -1.2 | -1.1 | -1.1 | GTPase-activating protein for Sec4p (by homology)                               |
| CA2719 | orf19.3340  | <i>SOD2</i>       | 1.2  | -1.2 | -1.3 | -1.2 | YHR008C | <i>SOD2</i>   | 1.0 | 1.1  | 1.1  | -1.3 | Manganese-superoxide dismutase                                                  |
| CA2720 | orf19.3341  | <i>IPF7366</i>    | -1.3 | -1.2 | -1.2 | -1.3 | YDR341C |               | 1.0 | 1.3  | 1.8  | 2.7  | Arginyl-tRNA synthetase                                                         |
| CA2721 | orf19.3342  | <i>IPF4799</i>    | -1.1 | -1.0 | 1.0  | -1.0 | YOR138C |               | 1.0 | -1.5 | -1.3 | -1.5 | unknown Function                                                                |
| CA2722 | orf19.3344  | <i>IPF4801</i>    | -1.1 | -1.1 | -1.1 | -1.0 | YOR132W | <i>VPS17</i>  | 1.0 | 1.2  | 1.4  | 1.5  | similar to <i>Saccharomyces cerevisiae</i> Vps17p vacuolar sorting protein (by  |
| CA2723 | orf19.3345  | <i>IPF4805</i>    | -1.1 | -1.1 | -1.1 | -1.0 | YDR409W | <i>SIZ1</i>   | 1.0 | -1.1 | -1.1 | 1.1  | unknown Function                                                                |
| CA2724 | orf19.10855 | <i>RPB7</i>       | 1.3  | 1.1  | 1.2  | 1.1  | YDR404C | <i>RPB7</i>   | 1.0 | 1.1  | 1.0  | 1.5  | DNA-directed RNA polymerase II,19KD subunit (by homology)                       |
| CA2725 | orf19.10856 | <i>MRPL23A</i>    | 1.0  | -1.0 | 1.0  | 1.0  | YOR150W | <i>MRPL23</i> | 1.0 | -1.4 | -1.4 | -1.6 | mitochondrial ribosomal protein L23 (by homology)                               |
| CA2727 | orf19.2119  | <i>IPF10318</i>   | 1.1  | -1.0 | -1.1 | -1.1 | YHR124W | <i>NDT80</i>  | 1.0 | -1.3 | -1.5 | -1.3 | similar to <i>Saccharomyces cerevisiae</i> Ndt80p meiosis-specific protein (by  |
| CA2728 | orf19.9665  | <i>IPF10322</i>   | 1.0  | -1.5 | -1.5 | -1.3 | YHR002W |               | 1.0 | -1.7 | -1.3 | -1.3 | putative mitochondrial carrier protein (by homology)                            |
| CA2729 | orf19.9664  | <i>NAT2</i>       | 1.1  | -1.2 | -1.2 | -1.2 | YGR147C | <i>NAT2</i>   | 1.0 | -1.2 | -1.2 | 1.0  | N-acetyltransferase for N-terminal methionine (by homology)                     |
| CA2730 | orf19.9663  | <i>IPF10325</i>   | 1.0  | -1.0 | -1.1 | 1.0  | YKL027W |               | 1.0 | -1.2 | -1.3 | -1.2 | molybdopterin-converting factor by homology                                     |
| CA2732 | orf19.2113  | <i>IPF10327</i>   | -1.0 | -1.1 | -1.0 | -1.1 | YLR324W |               | 1.0 | -1.9 | -1.5 | -1.7 | unknown function                                                                |
| CA2733 | orf19.2112  | <i>PRP18</i>      | -1.0 | -1.1 | -1.2 | -1.1 | YGR006W | <i>PRP18</i>  | 1.0 | -1.4 | -1.4 | -1.1 | U5 snRNA-associated protein (by homology)                                       |
| CA2734 |             | <i>RPL38</i>      | 1.5  | 1.4  | 1.4  | 1.3  | YLR325C | <i>RPL38</i>  | 1.0 | 1.1  | 1.3  | 1.6  | ribosomal protein L38 (by homology)                                             |
| CA2735 | orf19.2111  | <i>TFG2</i>       | 1.1  | -1.0 | -1.1 | -1.0 | YGR005C | <i>TFG2</i>   | 1.0 | -1.2 | -1.1 | -1.2 | transcription initiation factor TFIIIF middle subunit (by homology)             |
| CA2736 | orf19.2110  | <i>ATE1</i>       | -1.1 | 1.1  | 1.2  | 1.2  | YGL017W | <i>ATE1</i>   | 1.0 | 1.2  | 1.1  | 1.2  | arginyl tRNA transferase (by homology)                                          |
| CA2738 |             | <i>STF2</i>       | 1.1  | 1.2  | 1.3  | 1.4  | YLR327C |               | 1.0 | 2.0  | 2.3  | -3.6 | ATP synthase regulatory factor (by homology)                                    |
| CA2739 | orf19.2107  | <i>MUQ1</i>       | 1.2  | 1.1  | 1.2  | 1.2  | YGR007W | <i>MUQ1</i>   | 1.0 | -1.1 | -1.1 | -1.1 | choline phosphate cytidylyltransferase (by homology)                            |
| CA2740 | orf19.2106  | <i>IPF10633</i>   | 1.1  | 1.0  | 1.1  | -1.0 | YLR326W |               | 1.0 | -1.5 | -1.5 | -1.2 | unknown function                                                                |
| CA2741 | orf19.2105  | <i>IPF10632</i>   | 1.0  | 1.2  | 1.2  | 1.1  | YLR323C |               | 1.0 | -1.7 | -1.6 | -1.4 | unknown function                                                                |
| CA2742 | orf19.2104  | <i>JAC1</i>       | -1.0 | 1.1  | 1.0  | -1.1 | YGL018C | <i>JAC1</i>   | 1.0 | -1.1 | 1.2  | 1.1  | molecular chaperone (by homology)                                               |
| CA2743 | orf19.2102  | <i>CKB2.1</i>     | 1.0  | 1.1  | 1.2  | -1.0 | YGL019W | <i>CKB1</i>   | 1.0 | -1.3 | -2.0 | -3.3 | Casein kinase II, beta subunit (by homology)                                    |
| CA2744 | orf19.2101  | <i>IPF10626</i>   | 1.1  | 1.0  | 1.1  | 1.1  | YGL020C |               | 1.0 | -1.3 | -1.1 | -1.0 | unknown function                                                                |
| CA2745 | orf19.9647  | <i>HIR1</i>       | -1.0 | 1.0  | 1.1  | 1.0  | YBL008W | <i>HIR1</i>   | 1.0 | -1.2 | -1.1 | -1.1 | Histone transcription regulator (by homology)                                   |
| CA2747 | orf19.2367  | <i>IPF11467</i>   | -1.0 | 1.0  | 1.0  | 1.0  | YNL260C |               | 1.0 | -1.2 | -1.3 | -1.2 | unknown function                                                                |
| CA2748 | orf19.2368  | <i>IPF11466</i>   | -1.0 | -1.0 | -1.1 | -1.1 | YHR156C |               | 1.0 | -1.2 | 1.0  | -1.1 | unknown function                                                                |
| CA2749 | orf19.2369  | <i>IPF11465</i>   | -1.0 | -1.1 | -1.0 | 1.1  | YNL261W | <i>ORC5</i>   | 1.0 | -2.1 | -1.3 | -1.2 | unknown function                                                                |
| CA2750 |             | <i>ATX1</i>       | 1.1  | 1.0  | 1.1  | 1.0  | YNL259C | <i>ATX1</i>   | 1.0 | 1.0  | -1.4 | -1.3 | antioxidant protein and metal homeostasis factor (by homology to <i>S. cere</i> |
| CA2751 | orf19.2370  | <i>IPF19558</i>   | -1.2 | -1.0 | -1.1 | -1.1 | YNL258C |               | 1.0 | -1.1 | -1.1 | -1.3 | unknown function                                                                |
| CA2753 | orf19.13062 | <i>IPF16806</i>   | -1.1 | -1.0 | -1.1 | -1.0 | YPL181W |               | 1.0 | -1.2 | -1.2 | -1.1 | unknown function                                                                |
| CA2754 | orf19.13063 | <i>VPS45</i>      | -1.0 | 1.1  | 1.0  | -1.1 | YGL095C | <i>VPS45</i>  | 1.0 | 1.0  | 1.2  | 1.0  | vacuolar protein sorting-associated protein (by homology)                       |
| CA2756 | orf19.13065 | <i>IPF18418</i>   | -1.1 | 1.0  | 1.1  | 1.2  | YHR029C |               | 1.0 | -1.2 | -1.1 | 1.0  | unknown function                                                                |
| CA2757 | orf19.13066 | <i>IPF19767</i>   | 1.0  | -1.0 | 1.0  | -1.0 | YPR097W |               | 1.0 | -1.7 | -1.7 | -1.6 | unknown function                                                                |
| CA2758 | orf19.13067 | <i>GLC3</i>       | -1.2 | -1.0 | 1.2  | 1.4  | YEL011W | <i>GLC3</i>   | 1.0 | 1.5  | 2.2  | -1.6 | 1,4-glucan branching enzyme (by homology)                                       |
| CA2759 | orf19.13069 | <i>ARP4</i>       | 1.1  | -1.0 | 1.1  | 1.0  | YJL081C | <i>ARP4</i>   | 1.0 | -1.4 | -1.4 | -1.6 | actin-related protein (by homology)                                             |
| CA2762 | orf19.13072 | <i>IPF15012</i>   | 1.0  | 1.0  | -1.0 | -1.0 | YBL032W |               | 1.0 | 1.2  | 1.2  | 1.1  | pre mRNA splicing factor (by homology)                                          |
| CA2763 | orf19.5628  | <i>DIC1.3</i>     | 1.0  | -1.1 | -1.1 | 1.0  | YLR348C | <i>DIC1</i>   | 1.0 | -1.0 | -1.0 | -1.2 | dicarboxylate carrier protein, 3-prime end (by homology)                        |
| CA2764 | orf19.5629  | <i>QCR7</i>       | 1.1  | -1.3 | -1.3 | -1.0 | YDR529C | <i>QCR7</i>   | 1.0 | -1.0 | 1.1  | -2.6 | ubiquinol--cytochrome-c reductase subunit 7 (by homology)                       |
| CA2765 | orf19.13075 | <i>APA2</i>       | 1.1  | 1.3  | 1.9  | 1.6  | YDR530C | <i>APA2</i>   | 1.0 | -1.2 | -1.2 | -1.7 | ATP adenylyltransferase II (by homology)                                        |

|        |             |             |      |      |      |      |         |        |     |      |      |      |                                                                           |
|--------|-------------|-------------|------|------|------|------|---------|--------|-----|------|------|------|---------------------------------------------------------------------------|
| CA2767 | orf19.2682  | TOA1        | -1.1 | -1.1 | -1.1 | -1.0 | YOR194C | TOA1   | 1.0 | -1.6 | -1.1 | -1.2 | transcription initiation factor IIA (by homology)                         |
| CA2768 | orf19.2684  | IPF17011    | 1.0  | 1.0  | -1.0 | -1.0 | YOR195W | SLK19  | 1.0 | -1.3 | -1.1 | 1.0  | similar to Saccharomyces cerevisiae Slk19p involved in control of spindle |
| CA2770 | orf19.2686  | CPS1        | 1.1  | -1.1 | -1.1 | -1.1 | YJL172W | CPS1   | 1.0 | -1.8 | -1.9 | -2.7 | Carboxypeptidase YSCS precursor, second fragment (by homology)            |
| CA2771 |             | RPB10       | 1.1  | 1.1  | 1.2  | 1.1  | YOR210W | RPB10  | 1.0 | 1.0  | 1.1  | 1.3  | DNA-directed RNA polymerase II (by homology)                              |
| CA2772 | orf19.2688  | IPF20112    | -1.1 | -1.2 | -1.4 | -1.2 | YPL126W | NAN1   | 1.0 | 1.0  | 1.1  | 1.3  | unknown function                                                          |
| CA2773 | orf19.2690  | MGM1        | -1.1 | -1.2 | -1.1 | -1.1 | YOR211C | MGM1   | 1.0 | -1.2 | 1.1  | 1.1  | GTPase                                                                    |
| CA2774 | orf19.274   | TFC4        | 1.0  | 1.0  | 1.1  | 1.0  | YGR047C | TFC4   | 1.0 | -1.2 | -1.2 | -1.1 | transcription factor IIIC chain TFC4- like by homology                    |
| CA2775 | orf19.275   | POP5        | 1.0  | -1.0 | 1.0  | 1.0  | YAL033W | POP5   | 1.0 | -1.0 | 1.1  | 1.1  | subunit of RNase P- like by homology                                      |
| CA2776 | orf19.276   | IPF10124    | 1.0  | 1.0  | 1.0  | 1.0  | YGR212W |        | 1.0 | -1.2 | -1.4 | -1.3 | Alcohol acetyltransferase (by homology)                                   |
| CA2777 | orf19.277   | THI6        | 1.0  | 1.1  | 1.0  | 1.1  | YPL214C | THI6   | 1.0 | -1.4 | -1.0 | 1.2  | thiamin-phosphate pyrophosphorylase and hydroxyethylthiazole kinase-li    |
| CA2779 | orf19.279   | IPF3836     | 1.1  | -1.1 | -1.2 | -1.1 | YDL219W |        | 1.0 | 1.1  | -1.0 | -1.0 | unknown function                                                          |
| CA2782 | orf19.285   | IPF3806     | 1.0  | 1.6  | 2.1  | 2.0  | YNL157W |        | 1.0 | 1.2  | 1.2  | 1.2  | unknown function                                                          |
| CA2783 | orf19.286   | IPF3808     | -1.0 | -1.0 | -1.0 | 1.0  | YLL042C | APG10  | 1.0 | -1.7 | -2.1 | -2.4 | unknown function                                                          |
| CA2785 | orf19.288   | MET13       | -1.0 | -1.0 | 1.0  | -1.0 | YGL125W | MET13  | 1.0 | 1.2  | 1.3  | 1.1  | Methylene tetrahydrofolate reductase (by homology)                        |
| CA2786 | orf19.290   | KRE5.3EOC   | -1.1 | -1.0 | -1.1 | -1.0 | YOR336W | KRE5   | 1.0 | -1.1 | -1.2 | -1.2 | UDP-glucose:glycoprotein glucosyltransferase, 3-prime end (by homolog     |
| CA2787 | orf19.8243  | EFG1        | 1.1  | 1.1  | 1.1  | 1.0  | YMR016C | SOK2   | 1.0 | 1.1  | 1.3  | 1.2  | Enhanced filamentous growth factor                                        |
| CA2788 | orf19.8240  | RAD26       | 1.1  | -1.0 | -1.2 | -1.1 | YJR035W | RAD26  | 1.0 | -1.8 | -2.0 | -2.6 | DNA repair and recombination protein (by homology)                        |
| CA2789 | orf19.606   | IPF3567     | -1.0 | -1.1 | -1.2 | -1.0 | YLR352W |        | 1.0 | -1.5 | -1.7 | -2.0 | unknown function                                                          |
| CA2791 | orf19.603   | IMP4        | 1.0  | 1.0  | 1.0  | 1.0  | YNL075W | IMP4   | 1.0 | 1.5  | 1.5  | 2.0  | Ribonucleoprotein (by homology)                                           |
| CA2793 | orf19.8233  | TRK1.5F     | 1.0  | 1.1  | 1.1  | -1.0 | YKR050W | TRK2   | 1.0 | -1.4 | -1.1 | -1.0 | Potassium transporter, 5-prime end                                        |
| CA2795 | orf19.1723  | IPF8407     | -1.0 | 1.2  | 1.2  | 1.1  | YJL055W |        | 1.0 | 1.2  | 1.2  | 1.3  | unknown function                                                          |
| CA2796 | orf19.1721  | IPF8405     | 1.3  | -1.4 | -1.4 | -1.4 | YNL036W | NCE103 | 1.0 | 2.3  | 1.0  | -1.3 | similar to Saccharomyces cerevisiae Nce103p involved in non-classical p   |
| CA2797 | orf19.1720  | IPF8404     | 1.0  | 1.0  | -1.0 | 1.0  | YFR038W |        | 1.0 | -2.3 | -1.8 | -1.7 | putative helicase (by homology)                                           |
| CA2798 | orf19.1719  | IPF8402     | -1.3 | -1.4 | -1.4 | -1.2 | YIL099W | SGA1   | 1.0 | -1.5 | -1.6 | -1.6 | similar to Saccharomyces cerevisiae Sga1p glucan 1,4-alpha-glucosidas     |
| CA2801 | orf19.1716  | URA3        | 1.0  | 1.0  | 1.0  | 1.0  | YEL021W | URA3   | 1.0 | -1.3 | -1.4 | -1.1 | orotidine-5 -monophosphate decarboxylase [Candida albicans]               |
| CA2803 | orf19.5776  | IPF11711    | -1.1 | 1.3  | 1.3  | 1.3  | YDR457W | TOM1   | 1.0 | 1.2  | 1.1  | 1.1  | ubiquitin-protein ligase (by homology)                                    |
| CA2804 | orf19.5777  | IPF19961    | 1.1  | 1.3  | 1.2  | 1.1  | YBR096W |        | 1.0 | -1.0 | 1.1  | 1.0  | unknown function                                                          |
| CA2805 | orf19.5779  | RNR1        | 1.1  | 1.6  | 2.0  | 1.5  | YER070W | RNR1   | 1.0 | -2.2 | -1.2 | 1.2  | ribonucleoside-diphosphate reductase (by homology)                        |
| CA2806 | orf19.5780  | IPF11702    | 1.0  | -1.0 | 1.1  | 1.1  | YIL067C |        | 1.0 | -1.1 | -1.2 | -1.2 | unknown function                                                          |
| CA2807 | orf19.5782  | IPF11965    | -1.2 | 1.3  | 1.1  | 1.1  | YOR022C |        | 1.0 | 1.1  | 1.1  | 1.4  | unknown function                                                          |
| CA2808 | orf19.5783  | IPF11966    | 1.3  | 1.1  | 1.1  | 1.1  | YOR021C |        | 1.0 | -1.2 | -1.0 | 1.1  | unknown function                                                          |
| CA2810 | orf19.5788  | EFT2        | -1.1 | -1.0 | -1.2 | -1.2 | YOR133W | EFT1   | 1.0 | 1.2  | 2.5  | 3.6  | translation elongation factor 2                                           |
| CA2811 | orf19.10520 | RPS10       | -1.2 | -1.3 | -1.4 | -1.2 | YML063W | RPS1B  | 1.0 | 1.7  | 1.8  | 3.0  | Ribosomal protein 10                                                      |
| CA2812 | orf19.10519 | TEM1        | 1.0  | 1.0  | 1.1  | 1.1  | YML064C | TEM1   | 1.0 | -1.1 | 1.7  | 1.2  | GTP-binding protein of the RAS superfamily                                |
| CA2813 | orf19.10518 | ORC1        | -1.1 | -1.2 | -1.6 | -1.3 | YML065W | ORC1   | 1.0 | -1.2 | -1.1 | -1.2 | Origin recognition complex protein 1                                      |
| CA2814 | orf19.2998  | IPF5607     | 1.1  | -1.0 | -1.0 | 1.0  | YLR435W |        | 1.0 | 1.2  | 1.2  | 1.4  | unknown function                                                          |
| CA2815 | orf19.2996  | IPF5604     | -1.0 | 1.0  | -1.0 | 1.0  | YLR436C | ECM30  | 1.0 | -1.6 | -1.3 | -1.8 | unknown function                                                          |
| CA2816 | orf19.2995  | IPF5601     | -1.1 | -1.0 | -1.1 | -1.0 | YKL183W | LOT5   | 1.0 | -1.5 | -1.5 | -1.4 | unknown function                                                          |
| CA2817 |             | RPS16.3     | 1.2  | 1.1  | 1.1  | 1.1  | YMR143W | RPS16A |     |      |      |      | ribosomal protein, 3-prime end                                            |
| CA2818 | orf19.2994  | RPL13       | 1.3  | -1.1 | -1.2 | 1.0  | YDL082W | RPL13A | 1.0 | 1.4  | 1.6  | 1.8  | Ribosomal protein                                                         |
| CA2819 | orf19.2992  | RPA1        | -1.0 | 1.0  | -1.0 | 1.0  | YDL081C | RPP1A  | 1.0 | 2.4  | 2.7  | 2.7  | 60S ribosomal protein                                                     |
| CA2823 | orf19.1317  | IPF14554    | -1.3 | -1.5 | -1.8 | -1.6 | YHR073W | OSH3   | 1.0 | 1.2  | 1.3  | 1.2  | similar to Saccharomyces cerevisiae Osh3p oxysterol-binding protein (by   |
| CA2824 | orf19.1318  | IPF17888    | -1.0 | -1.3 | -1.3 | -1.2 | YOR385W |        | 1.0 | -1.1 | 1.2  | -1.1 | unknown function                                                          |
| CA2826 | orf19.1323  | APL6        | -1.0 | 1.0  | 1.1  | 1.0  | YGR261C | APL6   | 1.0 | 1.1  | 1.0  | 1.1  | AP-3 complex subunit, beta3-adaptin (by homology)                         |
| CA2827 | orf19.1324  | RAD2        | -1.0 | -1.1 | -1.3 | -1.2 | YGR258C | RAD2   | 1.0 | -1.3 | -1.3 | -1.2 | structure-specific nuclease of the nucleotide excision repairo:           |
| CA2833 | orf19.4785  | PTC1        | 1.0  | 1.5  | 1.9  | 1.3  | YDL006W | PTC1   | 1.0 | 1.1  | 1.2  | 1.3  | protein serine/threonine phosphatase 2c (by homology)                     |
| CA2836 | orf19.4788  | ARG5.6      | 1.0  | 1.1  | 1.2  | 1.1  | YER069W | ARG5.6 | 1.0 | -1.1 | -1.1 | 1.5  | acetylglutamate kinase and acetylglutamyl-phosphate reductase             |
| CA2845 | orf19.5730  | IPF10782    | -1.1 | 1.1  | 1.2  | 1.0  | YDR539W |        | 1.0 | 1.1  | 1.1  | 1.5  | unknown function                                                          |
| CA2846 | orf19.5731  | PAD1        | 1.0  | -1.0 | -1.0 | 1.0  | YDR538W | PAD1   | 1.0 | 1.3  | 1.2  | 1.2  | phenylacrylic acid decarboxylase (by homology)                            |
| CA2847 | orf19.5732  | =10785.EXO1 | -1.1 | -1.3 | -1.3 | -1.2 | YNR053C |        | 1.0 | 1.3  | 1.6  | 2.5  | unknown function, exon 1                                                  |
| CA2849 | orf19.5734  | POP2        | -1.0 | 1.0  | 1.0  | 1.0  | YNR052C | POP2   | 1.0 | 1.1  | 1.3  | 1.6  | required for glucose derepression (by homology)                           |
| CA2850 | orf19.5735  | CDC50       | -1.0 | -1.0 | -1.0 | 1.0  | YCR094W | CDC50  | 1.0 | -1.4 | -1.7 | -1.5 | cell division cycle mutant (by homology)                                  |
| CA2853 | orf19.1070  | IPF17057    | 1.3  | 1.6  | 1.8  | 1.9  | YMR010W |        | 1.0 | -1.2 | -1.1 | 1.2  | unknown function                                                          |
| CA2854 | orf19.1069  | RPN4        | 1.0  | 1.3  | 1.4  | 1.2  | YDL020C | RPN4   | 1.0 | -1.1 | 1.1  | 1.0  | 26S proteasome subunit (by homology)                                      |
| CA2856 | orf19.1066  | IPF7062     | -1.0 | -1.0 | 1.0  | -1.0 | YPL067C |        | 1.0 | -1.2 | -1.0 | 1.2  | unknown function                                                          |
| CA2858 | orf19.1064  | ACS2        | -1.2 | -1.8 | -1.7 | -1.8 | YLR153C | ACS2   | 1.0 | -2.8 | -2.6 | -2.1 | acetyl-coenzyme-A synthetase (by homology)                                |
| CA2859 | orf19.1063  | IPF7056     | 1.1  | 1.3  | 1.9  | 1.3  | YBR004C |        | 1.0 | -1.1 | -1.1 | 1.1  | unknown function                                                          |
| CA2861 | orf19.1061  | HHT21       | 1.4  | 1.4  | 1.5  | 1.5  | YNL031C | HHT2   | 1.0 | 2.3  | 2.3  | 2.0  | Histone H3                                                                |
| CA2862 | orf19.1059  | HHF21       | 1.2  | 1.2  | 1.2  | 1.4  | YNL030W | HHF2   | 1.0 | 1.5  | 1.5  | 1.1  | histone H4                                                                |
| CA2863 | orf19.1058  | IPF20117    | 1.0  | 1.0  | 1.0  | 1.0  | YLR421C | RPN13  | 1.0 | -1.2 | -1.0 | -1.1 | unknown function                                                          |
| CA2866 | orf19.2843  | RHO1        | 1.2  | 1.1  | 1.4  | 1.2  | YPR165W | RHO1   | 1.0 | 1.5  | 1.6  | 1.6  | GTP-binding protein of the rho subfamily of ras-like proteins (by homolog |

|        |             |                   |      |      |      |      |         |               |     |      |      |      |                                                                                    |
|--------|-------------|-------------------|------|------|------|------|---------|---------------|-----|------|------|------|------------------------------------------------------------------------------------|
| CA2867 | orf19.2844  | <i>IPF11688</i>   | -1.1 | 1.2  | 1.1  | 1.1  | YPR029C | <i>APL4</i>   | 1.0 | 1.0  | 1.1  | 1.1  | similar to <i>Saccharomyces cerevisiae</i> Apl4p AP-1 complex subunit, gamr        |
| CA2869 | orf19.2847  | <i>RPC82</i>      | -1.0 | -1.1 | -1.2 | -1.1 | YPR190C | <i>RPC82</i>  | 1.0 | -1.7 | -1.2 | -1.1 | DNA-directed RNA polymerase III, 82 KD subunit (by homology)                       |
| CA2872 | orf19.2848  | <i>APG13</i>      | -1.0 | 1.0  | 1.0  | 1.0  | YPR185W | <i>APG13</i>  | 1.0 | 1.1  | 1.2  | 1.1  | probable component of the autophagic system (by homology)                          |
| CA2873 | orf19.2849  | <i>AQY1</i>       | 1.0  | 1.1  | 1.3  | 1.1  | YPR192W | <i>AQY1</i>   | 1.0 | -1.1 | -1.1 | -1.3 | similarity to plasma membrane and water channel proteins (aquaporin-like)          |
| CA2875 | orf19.5844  | <i>MEI5</i>       | 1.0  | 1.0  | 1.1  | -1.0 | YPL121C | <i>MEI5</i>   | 1.0 | -1.4 | -1.3 | -1.5 | meiotic protein (by homology)                                                      |
| CA2877 | orf19.5846  | <i>TFB2</i>       | -1.0 | 1.1  | 1.1  | 1.1  | YPL122C | <i>TFB2</i>   | 1.0 | 1.2  | 1.2  | 1.3  | Transcription/repair factor (by homology)                                          |
| CA2878 | orf19.5847  | <i>RET1</i>       | 1.0  | 1.0  | 1.0  | -1.0 | YOR207C | <i>RET1</i>   | 1.0 | -2.7 | -2.6 | -2.3 | DNA-directed RNA polymerase III (by homology)                                      |
| CA2880 | orf19.5849  | <i>IPF3781</i>    | -1.1 | -1.0 | 1.0  | -1.0 | YPL133C |               | 1.0 | -1.3 | -1.3 | -1.3 | unknown function                                                                   |
| CA2881 | orf19.5850  | <i>RAD4</i>       | -1.1 | -1.2 | -1.3 | -1.3 | YOR206W | <i>NOC2</i>   | 1.0 | -1.4 | 1.2  | 1.6  | Excision repair protein (by homology)                                              |
| CA2882 | orf19.5851  | <i>STE13</i>      | -1.0 | -1.1 | -1.1 | 1.0  | YOR219C | <i>STE13</i>  | 1.0 | -1.7 | -1.3 | -1.4 | type IV dipeptidyl aminopeptidase (by homology)                                    |
| CA2884 | orf19.2476  | <i>IPF7201</i>    | -1.4 | -1.2 | -1.9 | -1.4 | YMR176W | <i>ECM5</i>   | 1.0 | -1.1 | -1.1 | -1.3 | similar to <i>Saccharomyces cerevisiae</i> Ecm5p involved in cell wall biogene     |
| CA2886 | orf19.2473  | <i>IPF7207</i>    | -1.1 | -1.0 | -1.0 | -1.0 | YML127W | <i>RSC9</i>   | 1.0 | -1.1 | 1.3  | 1.5  | unknown function                                                                   |
| CA2888 | orf19.2471  | <i>GIM5</i>       | 1.1  | 1.2  | 1.2  | 1.2  | YML094W | <i>GIM5</i>   |     |      |      |      | Gim complex component (by homology)                                                |
| CA2889 | orf19.2469  | <i>IPF13628</i>   | -1.0 | -1.0 | -1.1 | -1.1 | YML095C | <i>RAD10</i>  | 1.0 | -1.5 | -1.7 | -1.9 | putative DNA repair protein (by homology)                                          |
| CA2890 | orf19.2468  | <i>IPF13626</i>   | 1.1  | -1.0 | 1.0  | -1.0 | YER175C | <i>TMT1</i>   | 1.0 | 1.3  | 1.5  | 1.2  | Putative methyltransferase (by homology)                                           |
| CA2896 | orf19.3483  | <i>IPF14981</i>   | -1.2 | -1.4 | -1.5 | -1.2 | YPL206C |               | 1.0 | 1.0  | -1.1 | -1.2 | unknown function                                                                   |
| CA2897 | orf19.3482  | <i>IPF14979</i>   | -1.2 | -1.0 | -1.0 | 1.1  | YGL067W | <i>NPY1</i>   | 1.0 | -1.6 | -1.4 | -1.3 | similar to <i>Saccharomyces cerevisiae</i> Npy1p NADH pyrophosphatase (by          |
| CA2898 | orf19.3481  | <i>IPF15646</i>   | 1.0  | 1.0  | 1.1  | 1.0  | YGL064C |               | 1.0 | 1.2  | -1.0 | 1.0  | putative ATP-dependent RNA helicase (by homology)                                  |
| CA2899 | orf19.3480  | <i>IPF17681</i>   | -1.3 | -1.5 | -1.7 | -1.5 | YGL129C | <i>RSM23</i>  | 1.0 | -1.1 | -1.1 | 1.2  | similar to <i>Saccharomyces cerevisiae</i> Rsm23p involved in mitochondrial ft     |
| CA2900 | orf19.3478  | <i>NIP7</i>       | 1.2  | 1.1  | 1.0  | 1.0  | YPL211W | <i>NIP7</i>   | 1.0 | 1.1  | -1.1 | 1.1  | required for efficient 60S ribosome subunit biogenesis (by homology)               |
| CA2901 | orf19.3477  | <i>PUS1</i>       | 1.1  | -1.1 | -1.0 | -1.0 | YPL212C | <i>PUS1</i>   | 1.0 | -1.6 | -1.5 | -1.3 | pseudouridine synthase 1 (by homology)                                             |
| CA2902 | orf19.3476  | <i>HRR25</i>      | 1.1  | 1.0  | 1.1  | 1.1  | YPL204W | <i>HRR25</i>  | 1.0 | -1.2 | -1.2 | -1.2 | casein kinase I (by homology)                                                      |
| CA2904 | orf19.3474  | <i>IPL1</i>       | -1.1 | -1.0 | -1.1 | 1.2  | YPL209C | <i>IPL1</i>   | 1.0 | -1.1 | -1.5 | -1.7 | Ser/thr protein kinase (by homology)                                               |
| CA2905 | orf19.10977 | <i>IPF12049</i>   | -1.2 | -1.1 | -1.1 | -1.1 | YGL066W |               | 1.0 | -1.2 | -1.2 | -1.2 | unknown function                                                                   |
| CA2906 | orf19.4521  | <i>IPF15523</i>   | 1.2  | 1.3  | 1.7  | 1.8  | YOR246C |               | 1.0 | -1.0 | -1.1 | 1.0  | unknown function                                                                   |
| CA2907 | orf19.4520  | <i>IPF15525</i>   | 1.0  | -1.0 | -1.1 | -1.1 | YDR248C |               |     |      |      |      | putative gluconokinase (by homology)                                               |
| CA2908 | orf19.4519  | <i>SUV3</i>       | -1.1 | -1.1 | -1.0 | -1.0 | YPL029W | <i>SUV3</i>   | 1.0 | -1.1 | -1.3 | -1.1 | ATP-dependent RNA helicase, mitochondrial (by homology)                            |
| CA2909 | orf19.4518  | <i>IPF11424</i>   | -1.1 | -1.1 | -1.1 | 1.1  | YPL150W |               | 1.0 | -1.3 | -1.4 | -1.4 | unknown function                                                                   |
| CA2911 | orf19.4516  | <i>MET7</i>       | -1.1 | -1.1 | -1.1 | -1.1 | YOR241W | <i>MET7</i>   | 1.0 | 1.0  | -1.0 | 1.1  | folypolyglutamate synthetase [ <i>Candida albicans</i> ]                           |
| CA2924 | orf19.11687 | <i>FET33</i>      | 1.0  | -1.1 | -1.0 | -1.1 | YMR058W | <i>FET3</i>   | 1.0 | -1.7 | -1.9 | -1.7 | cell surface ferroxidase (by homology)                                             |
| CA2925 | orf19.4210  | <i>IPF7827</i>    | 1.0  | -1.0 | 1.0  | -1.1 | YGR110W |               | 1.0 | -1.1 | -1.4 | -1.9 | unknown function                                                                   |
| CA2926 | orf19.4209  | <i>UBA3</i>       | 1.1  | -1.0 | 1.0  | -1.1 | YPR066W | <i>UBA3</i>   | 1.0 | -1.1 | 1.3  | 1.4  | Ubiquitin-like protein activating enzyme                                           |
| CA2927 | orf19.4208  | <i>RAD52</i>      | 1.0  | -1.0 | 1.0  | -1.0 | YML032C | <i>RAD52</i>  | 1.0 | -1.1 | -1.1 | -1.1 | Nuclear ribonucleoprotein E                                                        |
| CA2928 |             | <i>SME1</i>       | 1.0  | 1.1  | -1.0 | 1.0  | YOR159C | <i>SME1</i>   | 1.0 | 1.3  | 1.1  | 1.2  | Nuclear ribonucleoprotein E                                                        |
| CA2929 | orf19.4206  | <i>IPF7838</i>    | 1.0  | 1.0  | 1.1  | 1.0  | YDR386W | <i>MUS81</i>  | 1.0 | -1.4 | -1.4 | -1.4 | similar to <i>Saccharomyces cerevisiae</i> Mus81p involved in DNA repair, inte     |
| CA2930 | orf19.4204  | <i>IPF7840</i>    | 1.0  | -1.1 | -1.1 | -1.0 | YOR158W | <i>PET123</i> | 1.0 | -1.3 | -1.2 | -1.3 | similar to <i>Saccharomyces cerevisiae</i> Pet123p ribosomal protein, mitoch       |
| CA2931 | orf19.4203  | <i>IPF7841</i>    | -1.1 | 1.2  | 1.1  | 1.2  | YML031W | <i>NDC1</i>   | 1.0 | -1.6 | -1.4 | -1.3 | similar to <i>Saccharomyces cerevisiae</i> Ndc1p nuclear envelope protein (by      |
| CA2932 | orf19.11677 | <i>NHX1</i>       | 1.2  | 1.5  | 1.5  | 1.5  | YDR456W | <i>NHX1</i>   | 1.0 | -1.0 | 1.1  | -1.0 | NA <sup>+</sup> -H <sup>+</sup> antiporter                                         |
| CA2934 | orf19.3329  | <i>IPF11515</i>   | 1.0  | -1.0 | -1.0 | 1.0  | YJL134W | <i>LCB3</i>   | 1.0 | -2.3 | -1.2 | -1.4 | similar to <i>Saccharomyces cerevisiae</i> Lcb3p sphingoid base-phosphate pl       |
| CA2935 | orf19.3328  | <i>IPF11521</i>   | 1.0  | -1.2 | -1.2 | -1.0 | YMR172W | <i>HOT1</i>   | 1.0 | -1.1 | -1.1 | -1.0 | unknown function                                                                   |
| CA2936 | orf19.3327  | <i>IPF8326</i>    | 1.0  | -1.0 | 1.0  | -1.0 | YKR056W | <i>RNC1</i>   | 1.0 | -1.2 | -1.2 | -1.1 | similar to <i>Saccharomyces cerevisiae</i> Rnc1p endo-exonuclease (by homo         |
| CA2937 |             | <i>RPS21B.3</i>   | 1.9  | 1.3  | 1.4  | 1.4  | YJL136C | <i>RPS21B</i> | 1.0 | 2.4  | 2.4  | 2.5  | ribosomal protein S21, 3-prime end                                                 |
| CA2938 | orf19.3325  | <i>IPF8321</i>    | -1.0 | 2.4  | 3.1  | 3.0  | YJL137C | <i>GLG2</i>   | 1.0 | -1.5 | -1.6 | -1.6 | similar to <i>Saccharomyces cerevisiae</i> Glg2p self-glucosylating initiator of c |
| CA2939 | orf19.3324  | <i>TIF1</i>       | 1.2  | 1.2  | 1.4  | 1.3  | YKR059W | <i>TIF1</i>   | 1.0 | 1.2  | 1.7  | 2.4  | translation initiation factor                                                      |
| CA2945 | orf19.1967  | <i>IMG1</i>       | 1.1  | 1.1  | 1.0  | -1.0 | YCR046C | <i>IMG1</i>   | 1.0 | -1.5 | -1.5 | -1.3 | Ribosomal protein, mitochondrial (by homology)                                     |
| CA2946 | orf19.1966  | <i>IPF6296</i>    | 1.0  | 1.1  | 1.0  | 1.0  | YCR047C | <i>BUD23</i>  | 1.0 | 1.2  | 1.3  | 1.6  | putative methyltransferase (by homology)                                           |
| CA2948 | orf19.1963  | <i>GDS1</i>       | -1.1 | -1.1 | -1.1 | -1.0 | YOR355W | <i>GDS1</i>   | 1.0 | 1.0  | 1.7  | 1.3  | nam9-1 suppressor (by homology)                                                    |
| CA2950 | orf19.9515  | <i>CLN2</i>       | 1.1  | -1.1 | 1.0  | 1.0  | YAL040C | <i>CLN3</i>   | 1.0 | 1.2  | 1.2  | 1.5  | G1/S-SPECIFIC CYCLIN CLN2                                                          |
| CA2951 | orf19.5854  | <i>SBP1</i>       | -1.0 | 1.1  | 1.2  | 1.2  | YHL034C | <i>SBP1</i>   | 1.0 | 1.3  | 1.3  | -1.0 | RNA binding protein-like (by homology)                                             |
| CA2953 | orf19.5855  | <i>MBP1</i>       | -1.1 | -1.1 | -1.1 | -1.0 | YDL056W | <i>MBP1</i>   | 1.0 | -1.3 | -1.6 | -1.8 | transcription factor (by homology)                                                 |
| CA2956 | orf19.5858  | <i>EGD2</i>       | 1.2  | 1.1  | -1.0 | -1.0 | YHR193C | <i>EGD2</i>   | 1.0 | 1.1  | 1.4  | 1.6  | Nascent polypeptide associated complex protein alpha subunit (by homo              |
| CA2958 | orf19.5861  | <i>KRE9</i>       | 1.0  | 1.1  | 1.3  | 1.2  | YJL174W | <i>KRE9</i>   | 1.0 | 1.3  | 1.2  | 1.4  | cell wall synthesis protein                                                        |
| CA2961 | orf19.5864  | <i>URK1</i>       | 1.0  | 1.1  | 1.1  | -1.0 | YNR012W | <i>URK1</i>   | 1.0 | 1.0  | 1.2  | 1.3  | uridine kinase (by homology)                                                       |
| CA2962 | orf19.5865  | <i>PRP2</i>       | -1.1 | -1.1 | -1.1 | -1.1 | YNR011C | <i>PRP2</i>   | 1.0 | -1.2 | -1.2 | -1.1 | RNA-dependent ATPase (by homology)                                                 |
| CA2963 | orf19.5611  | <i>GRP3</i>       | 1.0  | -1.0 | 1.0  | 1.0  | YOL151W | <i>GRE2</i>   | 1.0 | 1.1  | 1.0  | -1.2 | dihydroflavonol-4-reductases (by homology)                                         |
| CA2964 | orf19.5610  | <i>IPF13176.3</i> | 1.1  | 1.0  | 1.0  | 1.1  | YJL088W | <i>ARG3</i>   | 1.0 | -1.0 | 1.1  | 1.3  | ornithine carbamoyltransferase, 3-prime end (by homology)                          |
| CA2966 | orf19.5608  | <i>RPC34</i>      | 1.1  | 1.0  | -1.0 | -1.0 | YNR003C | <i>RPC34</i>  | 1.0 | -1.2 | -1.1 | 1.1  | DNA-directed RNA polymerase III (by homology)                                      |
| CA2967 | orf19.5605  | <i>IPF12513</i>   | -1.0 | -1.1 | -1.2 | -1.0 | YJL084C |               | 1.0 | -1.1 | -1.2 | 1.0  | unknown function                                                                   |
| CA2968 | orf19.5604  | <i>BMR1</i>       | 1.0  | 1.1  | 1.0  | 1.0  | YBR008C | <i>FLR1</i>   | 1.0 | -1.1 | -1.1 | -1.1 | benomyl/methothrexate resistance protein (by homology)                             |
| CA2975 | orf19.8822  | <i>ARO9</i>       | 1.0  | 1.1  | 1.1  | 1.0  | YHR137W | <i>ARO9</i>   | 1.0 | -1.3 | -1.3 | -1.5 | aromatic amino acid aminotransferase II (by homology)                              |
| CA2976 | orf19.8821  | <i>IPF14676</i>   | -1.2 | -1.2 | -1.1 | -1.0 | YIL041W |               | 1.0 | 1.6  | 1.6  | 2.5  | unknown function                                                                   |



|        |             |            |      |      |      |      |         |        |     |      |      |      |                                                                           |
|--------|-------------|------------|------|------|------|------|---------|--------|-----|------|------|------|---------------------------------------------------------------------------|
| CA2977 | orf19.1235  | HOM3       | -1.1 | 1.0  | 1.2  | 1.1  | YER052C | HOM3   | 1.0 | -1.2 | 1.4  | 2.4  | Aspartokinase (by homology)                                               |
| CA2979 | orf19.1233  | ADE4       | -1.3 | -1.3 | -1.2 | -1.1 | YMR300C | ADE4   | 1.0 | 1.1  | 1.1  | 2.4  | amidophosphoribosyltransferase (by homology)                              |
| CA2980 | orf19.1232  | GOG5       | 1.1  | 1.1  | 1.4  | 1.3  | YGL225W | GOG5   | 1.0 | 1.1  | -1.0 | 1.5  | GDP-mannose transporter (by homology)                                     |
| CA2981 | orf19.1231  | CSE1.5F    | -1.4 | -1.2 | -1.3 | -1.1 | YGL238W | CSE1   | 1.0 | -1.2 | -1.4 | -1.2 | Importin-beta-like protein, 5-prime end (by homology)                     |
| CA2985 | orf19.6009  | SET1       | -1.1 | -1.1 | -1.4 | -1.2 | YHR119W | SET1   | 1.0 | -1.3 | -1.2 | -1.3 | Chromatin regulatory protein (by homology)                                |
| CA2986 | orf19.6010  | CDC5       | -1.0 | 1.1  | 1.0  | -1.0 | YMR001C | CDC5   | 1.0 | 1.1  | 1.2  | 1.1  | Cell-cycle protein kinase (by homology)                                   |
| CA2987 |             | RPB11.3    | 1.0  | -1.0 | 1.0  | -1.0 | YOL005C | RPB11  | 1.0 | 1.0  | -1.1 | 1.2  | DNA-directed RNA polymerase II subunit, 3-prime end (by homology)         |
| CA2989 | orf19.6011  | SIN3.EXON3 | -1.2 | 1.0  | -1.1 | 1.0  | YOL004W | SIN3   | 1.0 | -1.3 | -1.1 | -1.0 | Histone deacetylase by homology                                           |
| CA2990 | orf19.6012  | IPF5092    | -1.1 | -1.1 | -1.2 | -1.1 | YOR296W |        | 1.0 | -1.7 | 1.0  | 1.1  | unknown function                                                          |
| CA2991 | orf19.6013  | IPF5088.3  | 1.0  | 1.0  | 1.0  | -1.1 | YMR233W |        | 1.0 | -1.6 | -1.5 | -1.6 | unknown function, 3-prime end                                             |
| CA2992 | orf19.6014  | RRS1       | 1.0  | 1.1  | 1.0  | 1.1  | YOR294W | RRS1   | 1.0 | -1.2 | 1.0  | 1.3  | Regulator for ribosome synthesis (by homology)                            |
| CA2993 | orf19.6118  | IPF9118    | 1.0  | -1.0 | -1.0 | -1.0 | YPR017C | DSS4   | 1.0 | -1.2 | -1.4 | -1.3 | unknown function                                                          |
| CA2995 | orf19.6121  | IPF9113    | 1.0  | 1.1  | 1.1  | 1.0  | YER130C |        | 1.0 | 1.1  | -1.1 | 2.0  | unknown function                                                          |
| CA2996 | orf19.6124  | IPF9108    | 1.1  | 1.0  | 1.2  | -1.1 | YLR131C | ACE2   | 1.0 | -1.4 | -1.3 | -1.0 | similar to Saccharomyces cerevisiae Ace2p transcription factor (by homo   |
| CA2997 | orf19.6126  | KGD2       | -1.4 | -2.7 | -3.2 | -2.6 | YDR148C | KGD2   | 1.0 | -1.9 | -1.6 | -2.7 | 2-oxoglutarate dehydrogenase complex E2 component (by homology)           |
| CA2998 | orf19.6127  | LPD1       | -1.3 | -1.9 | -2.6 | -2.0 | YFL018C | LPD1   | 1.0 | -1.9 | -2.1 | -2.1 | dihydroliipoamide dehydrogenase (by homology)                             |
| CA2999 | orf19.6129  | MRPL8      | 1.0  | 1.2  | 1.2  | 1.1  | YJL063C | MRPL8  | 1.0 | 1.0  | 1.3  | 1.2  | mitochondrial 60s ribosomal subunit (by homology)                         |
| CA3000 | orf19.6131  | TSC1.5     | 1.1  | 1.1  | 1.1  | 1.1  | YBR265W | TSC10  | 1.0 | 1.1  | -1.0 | 1.2  | 3-ketosphinganine reductase, 5-prime end (by homology)                    |
| CA3001 | orf19.6132  | IPF8841    | 1.4  | 1.2  | 1.3  | 1.1  | YBR262C |        | 1.0 | -2.6 | -2.3 | -2.0 | unknown function                                                          |
| CA3002 | orf19.6133  | PIF1       | -1.0 | -1.1 | -1.1 | -1.1 | YML061C | PIF1   | 1.0 | -1.6 | -1.7 | -1.6 | mitochondrial DNA helicase (by homology)                                  |
| CA3003 | orf19.13620 | IPF15741   | -1.2 | 1.0  | -1.0 | -1.0 | YDL117W | CYK3   | 1.0 | -1.1 | 1.2  | 1.3  | similar to Saccharomyces cerevisiae Cyk3p possibly involved in cytokine   |
| CA3004 | orf19.13619 | KIN28      | 1.0  | 1.1  | 1.0  | -1.1 | YDL108W | KIN28  | 1.0 | 1.2  | 1.3  | 1.2  | cyclin-dependent ser/thr protein kinase (by homology)                     |
| CA3006 | orf19.13616 | IPF12152   | 1.1  | -1.0 | 1.0  | -1.0 | YDL213C | FYV14  | 1.0 | 1.1  | 1.6  | 2.3  | Unknown function                                                          |
| CA3007 | orf19.13614 | IPF12148   | -1.1 | -1.3 | -1.2 | -1.2 | YNL182C |        | 1.0 | 1.1  | 1.3  | 1.8  | Unknown function                                                          |
| CA3008 | orf19.13613 | IPF12147   | -1.1 | -1.2 | -1.0 | -1.2 | YNL181W |        | 1.0 | -1.1 | 1.2  | 1.2  | unknown function                                                          |
| CA3009 | orf19.13611 | MRPL19     | -1.0 | -1.0 | -1.1 | -1.1 | YNL185C | MRPL19 | 1.0 | -1.2 | 1.0  | -1.1 | Ribosomal protein (by homology)                                           |
| CA3010 | orf19.13610 | IPF14568   | 1.1  | -1.1 | -1.0 | -1.1 | YGL246C | RAI1   | 1.0 | -1.3 | -1.1 | 1.0  | unknown function                                                          |
| CA3011 | orf19.6229  | CTA1       | 1.0  | -9.1 | -7.2 | -8.5 | YDR256C | CTA1   | 1.0 | -1.3 | -1.1 | 1.0  | catalase A, peroxisomal(by homology)                                      |
| CA3013 |             | PET117     | 1.0  | 1.0  | 1.1  | 1.1  | YER058W | PET117 | 1.0 | 1.2  | -1.1 | -1.2 | cytochrome c oxidase assembly factor (by homology)                        |
| CA3014 | orf19.13605 | IPF11915   | 1.1  | 1.4  | 1.4  | 1.2  | YIL050W | PCL7   | 1.0 | 1.0  | 1.2  | -1.0 | similar to Saccharomyces cerevisiae Pcl7p cyclin like protein interacting |
| CA3015 | orf19.11397 | IPF10029   | -1.4 | -1.8 | -1.8 | -1.6 | YFR044C |        | 1.0 | 1.1  | 1.1  | -1.1 | unknown function                                                          |
| CA3017 | orf19.11393 | IPF10021   | -1.3 | -2.0 | -2.3 | -1.9 | YER040W | GLN3   | 1.0 | -2.1 | -1.9 | -1.5 | unknown function                                                          |
| CA3018 | orf19.3911  | SAH1       | 1.4  | 1.1  | 1.2  | 1.2  | YER043C | SAH1   | 1.0 | -1.1 | 1.4  | 1.8  | S-adenosyl-L-homocysteine hydrolase by homology                           |
| CA3027 | orf19.11381 | IPF20126   | -1.0 | -1.0 | 1.1  | -1.0 | YDR470C | UGO1   | 1.0 | -1.9 | -1.8 | -1.7 | putative chromosome segregation protein (by homology)                     |
| CA3029 | orf19.223   | IPF13825   | -1.3 | 1.0  | -1.1 | -1.0 | YNR047W |        | 1.0 | -1.3 | -1.2 | -1.3 | similarity to serine/threonine protein kinases (by homology)              |
| CA3030 | orf19.220   | IPF19968   | 1.1  | 2.1  | 2.5  | 2.4  | YKL164C | PIR1   | 1.0 | 1.1  | 1.2  | 1.1  | putative cell wall protein of the PIR family                              |
| CA3031 | orf19.217   | IPF12324   | 1.0  | 1.0  | -1.1 | -1.0 | YPR013C |        | 1.0 | -1.1 | 1.0  | 1.1  | unknown function                                                          |
| CA3033 | orf19.215   | IPF13202   | -1.1 | -1.1 | -1.2 | -1.2 | YMR068W |        | 1.0 | -1.3 | 1.1  | -1.2 | unknown function                                                          |
| CA3034 | orf19.213   | RPN12      | 1.2  | 1.3  | 1.5  | 1.7  | YFR052W | RPN12  | 1.0 | -1.4 | 1.1  | 1.2  | 26S proteasome regulatory subunit (by homology)                           |
| CA3035 | orf19.212   | VPS28      | 1.0  | 1.2  | 1.3  | 1.2  | YPL065W | VPS28  | 1.0 | 1.2  | 1.3  | 1.4  | involved in vacuolar traffic (by homology)                                |
| CA3037 | orf19.210   | IPF13442   | -1.0 | 1.0  | 1.1  | 1.1  | YPL066W |        | 1.0 | -1.1 | 1.2  | 1.2  | unknown function                                                          |
| CA3038 | orf19.209   | IPF13438   | 1.1  | 1.1  | 1.2  | 1.0  | YIL049W | DFG10  | 1.0 | 1.1  | 1.2  | 1.1  | unknown function                                                          |
| CA3040 | orf19.2425  | IPF7306    | 1.0  | 1.1  | 1.1  | 1.0  | YBR241C |        | 1.0 | -1.1 | -1.3 | -1.4 | putative permease (by homology)                                           |
| CA3041 | orf19.2423  | IPF7303    | -1.0 | 1.0  | -1.1 | 1.0  | YBR239C |        | 1.0 | -1.0 | 1.2  | 1.3  | unknown function                                                          |
| CA3042 | orf19.2422  | ARC1       | -1.1 | -1.4 | -1.6 | -1.3 | YGL105W | ARC1   | 1.0 | 1.1  | 1.6  | 1.6  | G4 nucleic acid binding protein (by homology)                             |
| CA3043 | orf19.2419  | DOM34      | -1.0 | -1.0 | -1.1 | 1.0  | YNL001W | DOM34  | 1.0 | -1.2 | 1.3  | 1.4  | probable involvement in meiotic and mitotic divisions (by homolog         |
| CA3045 |             | IPF7297.3  | 1.2  | 1.0  | 1.1  | 1.1  | YGL106W | MLC1   | 1.0 | 1.2  | 1.1  | -1.1 | similar to Saccharomyces cerevisiae Mlc1p myosin ((Myo2p) light chain,    |
| CA3046 | orf19.2417  | IPF7295    | -1.2 | -1.2 | -1.4 | -1.2 | YOL034W |        | 1.0 | -1.0 | -1.1 | -1.1 | unknown function                                                          |
| CA3047 | orf19.9953  | MSE1       | -1.0 | -1.0 | -1.1 | -1.0 | YOL033W | MSE1   | 1.0 | -1.2 | -1.1 | -1.3 | Mitochondrial glutamyl-tRNA synthetase (by homology)                      |
| CA3048 | orf19.9950  | IPF14991   | 1.1  | 1.0  | 1.1  | 1.0  | YJR044C |        | 1.0 | -1.2 | -1.1 | -1.3 | unknown function                                                          |
| CA3049 | orf19.9949  | IPF14990   | 1.1  | 1.1  | 1.0  | 1.0  | YAL014C |        | 1.0 | 1.2  | 1.3  | 1.3  | unknown function                                                          |
| CA3050 | orf19.9948  | IPF13042   | -1.1 | -1.1 | -1.1 | -1.0 | YLR309C | IMH1   | 1.0 | -1.1 | 1.1  | -1.1 | similar to Saccharomyces cerevisiaeImh1p involved in vesicular transpor   |
| CA3051 | orf19.2408  | IPF13043   | 1.0  | -1.0 | 1.1  | 1.1  | YGL050W |        | 1.0 | -1.0 | -1.0 | 1.1  | unknown function                                                          |
| CA3052 | orf19.9945  | DPS1       | -1.3 | -1.2 | -1.2 | -1.2 | YLL018C | DPS1   | 1.0 | 1.1  | 1.7  | 1.8  | aspartyl-tRNA synthetase (by homology)                                    |
| CA3053 | orf19.9944  | GTR2       | -1.0 | 1.0  | 1.1  | 1.0  | YGR163W | GTR2   | 1.0 | -1.1 | -1.1 | -1.1 | GTP-binding protein (by homology)                                         |
| CA3055 | orf19.11771 | HIR2       | -1.2 | -1.1 | -1.1 | -1.1 | YOR038C | HIR2   | 1.0 | -1.6 | -1.7 | -1.6 | Histone transcription regulator (by homology)                             |
| CA3056 | orf19.4294  | IPF2953    | -1.1 | -1.1 | -1.1 | -1.1 | YOR037W | CYC2   | 1.0 | -1.2 | -1.0 | -1.0 | similar to Saccharomyces cerevisiae Cyc2p cytochrome-c mitochondrial i    |
| CA3057 | orf19.4293  | IPF2954    | -1.0 | -1.1 | -1.0 | -1.1 | YDR267C |        | 1.0 | -1.0 | 1.2  | 1.1  | unknown function                                                          |
| CA3059 | orf19.11766 | TRR1       | -1.0 | 1.2  | 1.1  | 1.2  | YDR353W | TRR1   | 1.0 | -1.8 | 1.2  | 1.2  | Thioredoxin reductase (by homology)                                       |
| CA3063 | orf19.4284  | IPF2971    | -1.1 | -1.1 | -1.1 | -1.0 | YLR226W | BUR2   | 1.0 | -1.1 | -1.3 | -1.0 | unknown function                                                          |
| CA3066 | orf19.4281  | IPF15813   | -1.0 | -1.2 | 1.0  | -1.0 | YLR223C | IFH1   | 1.0 | -1.5 | -1.2 | 1.1  | unknown function                                                          |

|        |             |                   |      |      |      |      |         |               |     |      |      |      |                                                                                   |
|--------|-------------|-------------------|------|------|------|------|---------|---------------|-----|------|------|------|-----------------------------------------------------------------------------------|
| CA3069 | orf19.4805  | <i>IPF6117</i>    | -1.0 | 1.1  | 1.2  | 1.1  | YMR266W | <i>RSN1</i>   | 1.0 | -1.3 | -1.6 | -1.6 | unknown function                                                                  |
| CA3070 | orf19.4807  | <i>PPA2</i>       | -1.1 | -1.2 | -1.2 | -1.2 | YMR267W | <i>PPA2</i>   | 1.0 | 1.0  | -1.2 | -1.3 | Mitochondrial inorganic pyrophosphatase                                           |
| CA3071 | orf19.4808  | <i>NUP188</i>     | 1.0  | 1.0  | 1.1  | -1.0 | YML103C | <i>NUP188</i> | 1.0 | -2.1 | -2.1 | -2.1 | Nucleoporin                                                                       |
| CA3072 | orf19.4809  | <i>ERG12</i>      | -1.0 | 1.2  | 1.2  | 1.1  | YMR208W | <i>ERG12</i>  | 1.0 | 1.4  | 1.6  | 1.9  | Mevalonate kinase (by homology)                                                   |
| CA3073 | orf19.4811  | <i>IPF6108</i>    | -1.1 | -1.2 | -1.2 | -1.2 | YOR271C |               | 1.0 | -1.3 | 1.2  | 1.9  | putative tricarboxylate carrier (by homology)                                     |
| CA3075 | orf19.4813  | <i>IPF6105</i>    | 1.1  | 1.2  | 1.6  | 1.2  | YMR217W | <i>GUA1</i>   | 1.0 | 1.9  | 3.2  | 4.6  | similar to <i>Saccharomyces cerevisiae</i> Gua1p GMP synthase (glutamine-h        |
| CA3078 | orf19.4816  | <i>IPF19970</i>   | 1.1  | 1.1  | 1.2  | 1.1  | YMR209C |               | 1.0 | -2.1 | -1.9 | -1.6 | unknown function                                                                  |
| CA3079 | orf19.4817  | <i>RAM2</i>       | 1.0  | -1.0 | 1.0  | 1.0  | YKL019W | <i>RAM2</i>   | 1.0 | -1.2 | -1.0 | -1.1 | geranylgeranyltransferase type I alpha subunit                                    |
| CA3080 | orf19.4153  | <i>IPF14634</i>   | -1.0 | -1.0 | -1.1 | -1.0 | YPL003W | <i>ULA1</i>   | 1.0 | 1.1  | -1.0 | -1.1 | APP-binding protein 1 (by homology)                                               |
| CA3081 | orf19.11629 | <i>EFT3</i>       | -1.1 | 1.1  | -1.1 | -1.1 | YNL014W | <i>HEF3</i>   | 1.0 | -1.0 | 1.9  | 1.2  | translation elongation factor 3                                                   |
| CA3083 | orf19.11626 | <i>IPF11262</i>   | -1.0 | -1.1 | -1.1 | -1.0 | YDL010W |               | 1.0 | -1.1 | -1.2 | -1.1 | unknown function                                                                  |
| CA3086 | orf19.11623 | <i>GLR1</i>       | -1.2 | -1.0 | 1.0  | -1.0 | YPL091W | <i>GLR1</i>   | 1.0 | 1.2  | 1.5  | 1.4  | by similarity to <i>S. cerev.</i> and <i>C. albicans</i> :glutathione reductase   |
| CA3087 | orf19.11622 | <i>SMD3</i>       | 1.0  | -1.0 | 1.0  | 1.1  | YLR147C | <i>SMD3</i>   | 1.0 | 1.2  | 1.3  | 1.7  | core snRNP protein (by homology)                                                  |
| CA3088 | orf19.11621 | <i>IPF9826</i>    | -1.2 | -1.1 | 1.1  | 1.1  | YLR256W | <i>HAP1</i>   | 1.0 | -1.4 | -1.4 | -1.1 | unknown function                                                                  |
| CA3089 |             | <i>IPF9825</i>    | -1.0 | 1.1  | 1.1  | 1.1  | YLR253W |               | 1.0 | -1.1 | 1.0  | 1.1  | unknown function                                                                  |
| CA3090 | orf19.11619 | <i>IPF18385</i>   | -1.0 | -1.1 | -1.1 | 1.0  | YLR068W | <i>FYV7</i>   | 1.0 | -1.5 | -1.2 | 1.1  | unknown function                                                                  |
| CA3092 | orf19.11617 | <i>IPF9821.3F</i> | 1.0  | -1.1 | -1.1 | -1.1 | YEL064C |               | 1.0 | 1.0  | -1.0 | 1.1  | unknown function, 3-prime end                                                     |
| CA3093 | orf19.11613 | <i>TOF1</i>       | -1.1 | -1.0 | -1.1 | -1.0 | YNL273W | <i>TOF1</i>   | 1.0 | 1.0  | -1.0 | 1.1  | Topoisomerase I interacting factor 1 (by homology)                                |
| CA3094 | orf19.11335 | <i>IPF11548</i>   | -1.3 | -1.2 | -1.1 | -1.1 | YCR008W | <i>SAT4</i>   | 1.0 | 1.0  | 1.2  | 1.1  | serine/threonine protein kinase (by homology)                                     |
| CA3095 | orf19.3856  | <i>CDC28</i>      | -1.1 | 1.0  | 1.1  | 1.1  | YBR160W | <i>CDC28</i>  | 1.0 | 1.2  | 1.3  | 1.2  | CELL DIVISION CONTROL PROTEIN 28 -protein kinase                                  |
| CA3097 | orf19.3859  | <i>IPF6600</i>    | 1.1  | 1.4  | 1.4  | 1.3  | YBR159W |               | 1.0 | -1.1 | -1.1 | 1.0  | unknown function                                                                  |
| CA3098 | orf19.3861  | <i>SIS1</i>       | -1.1 | 1.0  | -1.1 | 1.0  | YNL007C | <i>SIS1</i>   | 1.0 | 1.3  | 1.2  | 1.9  | heat shock protein (by homology)                                                  |
| CA3099 | orf19.3862  | <i>LST8</i>       | 1.1  | 1.0  | 1.1  | -1.0 | YNL006W | <i>LST8</i>   | 1.0 | 1.2  | 1.1  | 1.0  | required for transport of permeases from the golgi to the plasma m                |
| CA3101 | orf19.3865  | <i>IPF6593</i>    | -1.0 | -1.2 | -1.3 | -1.1 | YLR176C | <i>RFX1</i>   | 1.0 | -1.1 | -1.3 | -1.1 | similar to <i>Saccharomyces cerevisiae</i> Rfx1p DNA-binding protein (by hom      |
| CA3102 | orf19.3867  | <i>RLP7</i>       | 1.0  | 1.0  | 1.0  | -1.0 | YNL002C | <i>RLP7</i>   | 1.0 | 1.1  | 1.9  | 2.2  | ribosomal-like proteins                                                           |
| CA3103 | orf19.13908 | <i>IPF12086</i>   | 1.0  | -1.0 | 1.0  | 1.0  | YKL084W |               | 1.0 | -1.2 | -1.3 | -1.3 | unknown function                                                                  |
| CA3104 | orf19.13907 | <i>IPF12084</i>   | 1.0  | 1.0  | 1.0  | -1.1 | YOR220W |               | 1.0 | 1.3  | 1.5  | 1.1  | unknown function                                                                  |
| CA3106 | orf19.6552  | <i>IPF11821</i>   | 1.1  | 1.0  | 1.1  | 1.0  | YPR037C | <i>ERV2</i>   | 1.0 | 1.2  | 1.3  | 1.4  | unknown function                                                                  |
| CA3107 | orf19.6551  | <i>GOS1</i>       | -1.0 | 1.0  | 1.0  | -1.0 | YHL031C | <i>GOS1</i>   | 1.0 | -1.4 | -1.1 | -1.1 | SNARE protein of Golgi compartment (by homology)                                  |
| CA3108 | orf19.6550  | <i>IPF11826</i>   | 1.1  | 1.1  | 1.1  | 1.1  | YOR228C |               | 1.0 | -1.4 | -1.7 | -1.7 | unknown function                                                                  |
| CA3109 | orf19.6548  | <i>IPF11829</i>   | 1.2  | -1.0 | -1.1 | -1.1 | YPL135W | <i>ISU1</i>   | 1.0 | 1.0  | 1.1  | 1.1  | unknown function                                                                  |
| CA3110 | orf19.6544  | <i>LPJ9</i>       | -1.0 | 1.3  | 1.1  | 1.1  | YOR227W |               | 1.0 | -1.3 | 1.2  | 1.1  | Microtubule-associated protein (by homology)                                      |
| CA3111 | orf19.6541  | <i>RPL5</i>       | -1.1 | -1.1 | -1.1 | -1.1 | YPL131W | <i>RPL5</i>   | 1.0 | 1.5  | 3.2  | 4.2  | ribosomal protein (by homology)                                                   |
| CA3112 | orf19.6540  | <i>PFK2</i>       | -1.0 | 9.6  | 8.3  | 8.5  | YMR205C | <i>PFK2</i>   | 1.0 | 1.2  | 2.1  | 2.7  | 6-phosphofructokinase, beta subunit                                               |
| CA3113 | orf19.13892 | <i>IPF15737</i>   | -1.1 | -1.0 | -1.1 | -1.1 | YPL235W | <i>RVB2</i>   | 1.0 | 1.0  | 1.1  | 1.1  | similar to <i>Saccharomyces cerevisiae</i> Rvb2p RuvB-like protein (by homo       |
| CA3115 |             | <i>ECM33.3</i>    | 1.0  | 1.1  | 1.1  | 1.0  | YBR078W | <i>ECM33</i>  | 1.0 | -2.1 | -2.0 | -1.2 | cell wall biogenesis, 3-prime end (by homology)                                   |
| CA3116 | orf19.3010  | <i>LAB2</i>       | -1.0 | -1.0 | 1.1  | 1.0  | YLR239C | <i>LIP2</i>   | 1.0 | -1.1 | -1.1 | -1.0 | LIPOATE BIOSYNTHESIS PROTEIN by homology                                          |
| CA3118 | orf19.3008  | <i>COQ4</i>       | -1.2 | -1.2 | -1.1 | -1.1 | YDR204W | <i>COQ4</i>   | 1.0 | -2.6 | -1.8 | -1.5 | ubiquinone biosynthesis                                                           |
| CA3120 | orf19.3007  | <i>IPF5358</i>    | 1.0  | 1.0  | 1.2  | 1.1  | YDR357C |               | 1.0 | -1.0 | 1.4  | 1.3  | unknown function                                                                  |
| CA3121 | orf19.3006  | <i>GGA1</i>       | -1.4 | -1.3 | -1.5 | -1.4 | YHR108W | <i>GGA2</i>   | 1.0 | -1.1 | 1.3  | 1.3  | Arf-binding protein                                                               |
| CA3122 | orf19.3004  | <i>IPF5356</i>    | 1.0  | 1.1  | 1.3  | 1.2  | YDR262W |               | 1.0 | -1.5 | -1.2 | -1.4 | unknown function                                                                  |
| CA3123 |             | <i>RPL6.3</i>     | 1.4  | 1.1  | 1.0  | 1.1  | YLR448W | <i>RPL6B</i>  | 1.0 | 1.6  | 2.4  | 2.3  | ribosomal protein, 3-prime end                                                    |
| CA3124 | orf19.3003  | <i>IPF5353.3</i>  | -1.1 | 1.2  | -1.3 | -1.0 | YML072C |               | 1.0 | -1.2 | -1.3 | -1.1 | unknown function, 3-prime end                                                     |
| CA3126 | orf19.1358  | <i>GCN4</i>       | -1.3 | -1.1 | -1.1 | 1.1  | YEL009C | <i>GCN4</i>   | 1.0 | 1.2  | 2.0  | 2.2  | transcriptional activator                                                         |
| CA3127 | orf19.1359  | <i>IPF8915</i>    | 1.0  | 1.0  | -1.0 | -1.0 | YMR067C |               | 1.0 | -1.4 | 1.1  | -1.2 | unknown function                                                                  |
| CA3128 | orf19.1360  | <i>IPF8914</i>    | 1.0  | 1.1  | 1.0  | 1.0  | YNL213C |               | 1.0 | -1.1 | 1.1  | 1.1  | unknown function                                                                  |
| CA3130 | orf19.1361  | <i>TIM23</i>      | 1.1  | -1.0 | 1.0  | 1.0  | YNR017W | <i>MAS6</i>   | 1.0 | -1.2 | -1.1 | -1.2 | mitochondrial inner membrane import translocase subunit (by homology)             |
| CA3131 | orf19.1362  | <i>IPF8910</i>    | 1.1  | -1.0 | -1.1 | -1.1 | YNR015W | <i>SMM1</i>   | 1.0 | -1.0 | 1.3  | 1.4  | unknown function                                                                  |
| CA3132 | orf19.1363  | <i>IPF8904</i>    | 1.0  | 1.0  | -1.0 | -1.1 | YOR338W |               | 1.0 | -1.1 | 1.0  | 1.6  | unknown function                                                                  |
| CA3144 | orf19.3715  | <i>ASF1</i>       | 1.1  | 1.1  | 1.0  | 1.0  | YJL115W | <i>ASF1</i>   | 1.0 | -1.4 | -1.4 | -1.7 | anti-silencing protein (by homology)                                              |
| CA3145 | orf19.6155  | <i>CDC9</i>       | -1.1 | 1.0  | 1.1  | 1.0  | YDL164C | <i>CDC9</i>   | 1.0 | 1.1  | 1.1  | 1.0  | DNA ligase (by homology)                                                          |
| CA3147 | orf19.6160  | <i>IPF9803</i>    | -1.1 | -1.1 | -1.3 | -1.2 | YMR031C |               | 1.0 | 1.5  | 1.5  | -1.0 | unknown function                                                                  |
| CA3148 | orf19.6163  | <i>IPF9808</i>    | 1.0  | 1.0  | 1.0  | -1.0 | YKL049C | <i>CSE4</i>   | 1.0 | -1.9 | -1.5 | -1.7 | similar to <i>Saccharomyces cerevisiae</i> cse4p with strong similarity to histor |
| CA3149 | orf19.6165  | <i>KGD1</i>       | 1.1  | -2.0 | -2.1 | -2.0 | YIL125W | <i>KGD1</i>   | 1.0 | -2.5 | -2.1 | -3.6 | 2-oxoglutarate dehydrogenase                                                      |
| CA3151 | orf19.6167  | <i>IPF4033</i>    | -1.0 | -1.1 | -1.1 | -1.1 | YIL124W | <i>AYR1</i>   | 1.0 | -1.1 | -1.2 | -1.9 | similar to <i>Saccharomyces cerevisiae</i> Ayr1p 1-acyldihydroxyacetone-phos      |
| CA3156 | orf19.1589  | <i>IPF14455</i>   | -1.1 | -1.1 | -1.1 | 1.0  | YJL025W | <i>RRN7</i>   | 1.0 | -1.7 | -1.6 | -1.4 | similar to <i>Saccharomyces cerevisiae</i> Rrn7p polymerase I specific transcr    |
| CA3157 | orf19.1588  | <i>IPF14456</i>   | 1.0  | 1.1  | 1.0  | 1.1  | YBR269C |               | 1.0 | -1.1 | -1.2 | -1.3 | unknown function                                                                  |
| CA3160 | orf19.1585  | <i>ZRT2</i>       | 1.2  | 2.7  | 3.8  | 2.6  | YLR130C | <i>ZRT2</i>   | 1.0 | -1.6 | -1.3 | 1.0  | zinc transport protein (by homology)                                              |
| CA3165 | orf19.1578  | <i>FMI1</i>       | -1.4 | -1.1 | -1.4 | -1.2 | YMR229C | <i>RRP5</i>   | 1.0 | -1.3 | 1.2  | 1.5  | processing of pre-ribosomal RNA                                                   |
| CA3166 | orf19.1577  | <i>IPF9634</i>    | -1.0 | -1.0 | 1.0  | -1.0 | YMR136W | <i>GAT2</i>   | 1.0 | -1.3 | -1.0 | 1.0  | probable GATA zinc finger transcription factor (by homology)                      |
| CA3167 | orf19.1576  | <i>IPF9632</i>    | -1.1 | -1.2 | -1.1 | -1.1 | YHL010C |               | 1.0 | -1.0 | -1.1 | -1.0 | unknown function                                                                  |



|        |             |            |      |      |      |      |         |        |     |      |      |      |                                                                          |
|--------|-------------|------------|------|------|------|------|---------|--------|-----|------|------|------|--------------------------------------------------------------------------|
| CA3168 | orf19.1575  | PRS3       | 1.1  | 1.2  | 1.4  | 1.2  | YHL011C | PRS3   | 1.0 | 1.3  | 1.6  | 1.8  | ribose-phosphate pyrophosphokinase                                       |
| CA3169 | orf19.1395  | IPF7686    | 1.0  | 1.5  | 2.0  | 1.6  | YER053C |        | 1.0 | -1.5 | -1.5 | -1.4 | putative mitochondrial phosphate carrier protein (by homology)           |
| CA3170 | orf19.1396  | IPF7685    | 1.0  | -1.0 | 1.0  | -1.0 | YIL044C | AGE2   | 1.0 | -1.1 | 1.1  | 1.1  | putative GTPase activating protein (by homology)                         |
| CA3174 | orf19.1402  | CCT2       | -1.4 | -1.2 | -1.4 | -1.5 | YIL142W | CCT2   | 1.0 | 1.3  | 1.8  | 2.0  | chaperonin of the TCP1 ring complex,cytosolic (by homology to S. cerev.  |
| CA3175 | orf19.1403  | IPF11587   | -1.2 | -1.6 | -1.5 | -1.5 | YNL083W |        | 1.0 | -1.3 | 1.2  | 1.2  | unknown function                                                         |
| CA3176 | orf19.1404  | IPF11588   | -1.0 | -1.0 | -1.0 | -1.0 | YML080W | DUS1   | 1.0 | 1.2  | 1.1  | 1.3  | unknown function                                                         |
| CA3179 | orf19.2128  | YLF2       | -1.0 | -1.0 | -1.1 | -1.0 | YHL014C | YLF2   | 1.0 | -1.3 | -1.3 | -1.3 | GTP-binding protein                                                      |
| CA3180 | orf19.2131  | IPF12244   | -1.1 | 1.1  | 1.3  | 1.1  | YKL034W |        | 1.0 | -1.5 | -1.3 | -1.2 | unknown function                                                         |
| CA3183 | orf19.2135  | TSM1.3F    | -1.0 | 1.0  | -1.2 | -1.1 | YCR042C | TSM1   | 1.0 | 1.0  | 1.1  | -1.0 | component of TFIIID complex, 3-prime end (by homology)                   |
| CA3186 | orf19.2138  | ILS1       | -1.3 | -1.0 | -1.5 | -1.3 | YBL076C | ILS1   | 1.0 | -1.3 | -1.1 | -1.0 | isoleucyl-tRNA synthetase (by homology)                                  |
| CA3187 | orf19.2143  | IPF17094   | 1.0  | -1.0 | -1.1 | -1.0 | YPL183C |        | 1.0 | -1.5 | -1.4 | -1.0 | unknown function                                                         |
| CA3188 | orf19.2146  | IPF11610   | 1.0  | -1.0 | 1.1  | 1.0  | YEL056W | HAT2   | 1.0 | -1.1 | -1.0 | -1.1 | similar to Saccharomyces cerevisiae Hat2 subunit of the major yeast hist |
| CA3189 | orf19.2149  | IPF11607   | 1.0  | 1.1  | 1.1  | 1.0  | YPR003C |        | 1.0 | -1.3 | -1.3 | -1.5 | unknown function                                                         |
| CA3190 | orf19.2150  | IPF11603   | -1.2 | -1.0 | -1.1 | -1.1 | YPR004C |        | 1.0 | -2.2 | -2.7 | -2.6 | unknown function                                                         |
| CA3191 | orf19.2151  | IPF11601   | -1.1 | -1.2 | -1.0 | -1.3 | YOR165W |        | 1.0 | -1.3 | 1.1  | 1.4  | unknown function                                                         |
| CA3193 | orf19.6170  | IPF3418    | -1.1 | 1.0  | -1.1 | -1.0 | YCL029C | BIK1   | 1.0 | -1.0 | -1.1 | 1.0  | unknown function                                                         |
| CA3194 | orf19.6171  | IPF3425    | -1.1 | -1.1 | -1.1 | -1.1 | YIL115C | NUP159 | 1.0 | -1.2 | -1.2 | -1.2 | unknown function                                                         |
| CA3195 | orf19.6173  | IPF3426    | -1.0 | -1.1 | -1.0 | -1.0 | YOR047C | STD1   | 1.0 | -1.1 | 1.1  | 1.7  | unknown function                                                         |
| CA3196 | orf19.6175  | IPF3428    | -1.0 | -1.1 | -1.1 | -1.0 | YLR051C |        | 1.0 | -1.0 | 1.2  | 1.5  | unknown function                                                         |
| CA3197 | orf19.6176  | SEC61      | -1.2 | 1.4  | 1.4  | 1.4  | YLR378C | SEC61  | 1.0 | 1.0  | 1.4  | 1.6  | ER protein-translocation complex subunit                                 |
| CA3199 | orf19.6178  | FBP1       | -1.1 | -6.2 | -7.9 | -7.2 | YLR377C | FBP1   | 1.0 | -3.2 | -3.8 | -3.3 | Fructose-1,6-bisphosphatase                                              |
| CA3200 | orf19.6180  | IPF3439    | 1.2  | 1.4  | 2.0  | 1.9  | YDL054C |        | 1.0 | -1.1 | 1.1  | 1.2  | unknown function                                                         |
| CA3207 | orf19.6189  | IPF3456    | -1.0 | 1.0  | 1.1  | 1.0  | YHR198C |        | 1.0 | -1.0 | -1.2 | -1.4 | unknown function                                                         |
| CA3208 | orf19.6190  | PSA1       | -1.0 | 1.2  | 1.2  | 1.1  | YDL055C | PSA1   | 1.0 | -1.5 | 1.7  | 1.5  | GDP-mannose pyrophosphorylase                                            |
| CA3212 | orf19.6208  | MEF2       | -1.1 | -1.4 | -1.3 | -1.4 | YJL102W | MEF2   | 1.0 | -1.3 | -1.4 | -1.5 | translation elongation factor (by homology)                              |
| CA3213 | orf19.6205  | IPF8160    | 1.0  | -1.0 | -1.1 | 1.0  | YML003W |        | 1.0 | -3.4 | -3.1 | -3.3 | unknown function                                                         |
| CA3214 | orf19.6203  | PUT3       | -1.1 | -1.4 | -1.4 | -1.3 | YKL015W | PUT3   | 1.0 | -1.2 | 1.0  | 1.1  | putative positive activator of the proline utilisation pathway           |
| CA3215 | orf19.6199  | HCS1       | -1.1 | -1.1 | -1.2 | -1.1 | YKL017C | HCS1   | 1.0 | -1.2 | -1.1 | -1.0 | putative DNA helicase A (by homology)                                    |
| CA3217 | orf19.6197  | DHH1       | 1.1  | 1.2  | 1.2  | 1.1  | YDL160C | DHH1   | 1.0 | 1.1  | 1.4  | 1.3  | RNA helicase by homology                                                 |
| CA3219 | orf19.6195  | IPF10003   | -1.1 | 1.0  | -1.3 | -1.1 | YGR276C | RNH70  | 1.0 | -1.1 | 1.3  | 1.3  | similar to Saccharomyces cerevisiae Rnh70p ribonuclease H (by homolo     |
| CA3221 | orf19.6193  | Y10000.5EO | -1.2 | -1.1 | -1.4 | -1.2 | YGR274C | TAF145 | 1.0 | -1.1 | -1.1 | -1.0 | unknown function, 5-prime end                                            |
| CA3223 | orf19.6284  | SRP102     | 1.1  | 1.0  | 1.1  | 1.0  | YKL154W | SRP102 | 1.0 | -2.8 | -2.0 | -1.7 | Signal recognition particle receptor (by homology)                       |
| CA3224 | orf19.6285  | GLC7       | -1.3 | 1.0  | 1.0  | -1.1 | YER133W | GLC7   | 1.0 | 1.0  | 1.5  | 1.6  | Ser/thr phosphoprotein phosphatase 1 (by homology)                       |
| CA3225 | orf19.6286  | IPF9329    | 1.0  | 1.0  | 1.0  | 1.1  | YER128W |        | 1.0 | -1.2 | -1.3 | -1.4 | unknown function                                                         |
| CA3226 |             | RPS27      | 1.4  | -1.0 | 1.3  | 1.3  | YKL156W | RPS27A | 1.0 | 1.4  | 1.4  | 1.7  | ribosomal protein S27 (by homology)                                      |
| CA3227 | orf19.6287  | AAT21      | -1.4 | -2.1 | -2.1 | -2.1 | YLR027C | AAT2   | 1.0 | -1.3 | -1.2 | -1.2 | aspartate aminotransferase (by homology)                                 |
| CA3229 | orf19.6291  | FUN30      | 1.0  | -1.1 | -1.3 | -1.1 | YAL019W | FUN30  | 1.0 | -1.3 | -1.0 | 1.0  | helicases of the Snf2/Rad54 family(by homology)                          |
| CA3230 | orf19.6293  | EMP24      | 1.3  | 1.3  | 1.3  | 1.2  | YGL200C | EMP24  | 1.0 | -1.2 | -1.3 | -1.3 | component of the COPII-coated vesicles (by homology)                     |
| CA3233 | orf19.6294  | MYO1       | -1.1 | -1.0 | -1.1 | -1.0 | YHR023W | MYO1   | 1.0 | -1.3 | 1.0  | 1.3  | myosin-1 isoform (type II myosin) heavy chain (by homology)              |
| CA3234 | orf19.6295  | MAS2       | -1.1 | -1.0 | -1.1 | -1.1 | YHR024C | MAS2   | 1.0 | -1.1 | -1.2 | -1.1 | processing peptidase, catalytic 53kDa (alpha) subunit, mitochondrial (by |
| CA3235 | orf19.6296  | SNF8       | -1.0 | 1.1  | 1.1  | 1.1  | YPL002C | SNF8   | 1.0 | -1.0 | 1.1  | 1.1  | involved in glucose derepression (by homology)                           |
| CA3236 | orf19.6297  | DEG1       | -1.1 | -1.1 | -1.0 | -1.0 | YFL001W | DEG1   | 1.0 | 2.2  | 2.6  | 4.2  | pseudouridine synthase (by homology)                                     |
| CA3237 | orf19.6298  | SPB4       | -1.0 | 1.0  | -1.0 | -1.0 | YFL002C | SPB4   | 1.0 | 1.3  | 1.6  | 2.4  | ATP-dependent RNA helicase of DEAH box family (by homology)              |
| CA3240 | orf19.4683  | IPF10559   | -1.2 | -1.2 | -1.5 | -1.2 | YKR095W | MLP1   | 1.0 | -1.7 | -2.1 | -2.2 | myosin-like protein (by homology)                                        |
| CA3242 | orf19.4681  | RAT1       | -1.6 | -1.7 | -2.4 | -1.8 | YOR048C | RAT1   | 1.0 | 1.1  | 1.7  | 1.8  | 5'-3' Exoribonuclease (by homology)                                      |
| CA3244 | orf19.4679  | AGP2       | -1.2 | -1.1 | -1.2 | -1.1 | YBR132C | AGP2   | 1.0 | -1.5 | -1.5 | -1.7 | amino-acid permease (by homology)                                        |
| CA3245 | orf19.4678  | IPF19980   | -1.1 | 1.0  | 1.2  | 1.2  | YJR107W |        | 1.0 | 1.0  | 1.1  | -1.3 | putative lipase (by homology)                                            |
| CA3246 | orf19.4677  | IPF15830   | -1.2 | -1.2 | -1.0 | -1.1 | YML041C |        | 1.0 | -1.3 | -1.1 | -1.3 | unknown function                                                         |
| CA3256 | orf19.11229 | IPF4730    | -1.0 | -1.0 | -1.1 | -1.1 | YOR112W |        | 1.0 | -1.1 | 1.2  | 1.2  | unknown Function                                                         |
| CA3261 | orf19.2694  | TYS1       | 1.0  | -1.0 | 1.0  | -1.1 | YGR185C | TYS1   | 1.0 | -1.5 | 1.1  | 1.4  | tyrosyl-tRNA synthetase by homology                                      |
| CA3262 | orf19.2695  | UBR11.3    | -1.1 | 1.0  | -1.1 | -1.1 | YGR184C | UBR1   | 1.0 | -1.4 | -1.4 | -1.3 | ubiquitin-protein ligase, 3-prime end ( by homology)                     |
| CA3263 | orf19.2697  | UBR12      | -1.2 | 1.0  | -1.1 | -1.1 | YLR024C | UBR2   | 1.0 | -1.6 | -1.7 | -1.6 | ubiquitin-protein ligase by homology                                     |
| CA3264 | orf19.2698  | IPF5035    | 1.0  | 1.0  | 1.0  | 1.0  | YLL014W |        | 1.0 | -1.1 | 1.1  | 1.0  | unknown function                                                         |
| CA3265 | orf19.2699  | ABP1       | -1.2 | -1.5 | -1.6 | -1.4 | YCR088W | ABP1   | 1.0 | -1.5 | -1.6 | -2.0 | actin-binding protein (by homology)                                      |
| CA3266 | orf19.2703  | IPF5045    | 1.0  | -1.1 | -1.1 | -1.1 | YMR171C |        | 1.0 | -1.1 | 1.0  | 1.1  | unknown function                                                         |
| CA3270 | orf19.6304  | LYS5       | -1.1 | 1.0  | 1.1  | 1.1  | YGL154C | LYS5   | 1.0 | 1.1  | 1.1  | 1.0  | L-aminoadipate-semialdehyde dehydrogenase (by homology)                  |
| CA3271 | orf19.6305  | GLY2       | -1.0 | -1.1 | -1.1 | -1.1 | YEL046C | GLY1   | 1.0 | -1.1 | 1.5  | 2.2  | L-threonine aldolase, low-specific                                       |
| CA3278 | orf19.6312  | RPS3       | 1.1  | -1.2 | -1.3 | -1.0 | YNL178W | RPS3   | 1.0 | 1.8  | 2.7  | 3.1  | Ribosomal protein S3.e (by homology)                                     |
| CA3281 | orf19.6314  | RPB8       | 1.0  | -1.1 | -1.0 | -1.0 | YOR224C | RPB8   | 1.0 | 1.6  | 1.5  | 2.0  | DNA-directed RNA polymerase I, II, III 16 KD subunit (by homology)       |
| CA3283 | orf19.6316  | IPF6274    | -1.0 | -1.1 | -1.0 | -1.0 | YMR221C |        | 1.0 | -1.3 | 1.1  | 1.1  | unknown function                                                         |
| CA3284 | orf19.6317  | ADE6       | -1.2 | -1.0 | -1.3 | -1.3 | YGR061C | ADE6   | 1.0 | -2.7 | -3.5 | -1.8 | 5-phosphoribosylformyl glycnamidine synthetase (by homology)             |

|        |            |                   |      |      |      |      |         |               |      |      |      |                  |                                                                          |
|--------|------------|-------------------|------|------|------|------|---------|---------------|------|------|------|------------------|--------------------------------------------------------------------------|
| CA3285 | orf19.6318 | <i>IPF6280</i>    | 1.0  | 1.1  | 1.0  | 1.1  | YJR085C | 1.0           | -1.3 | -1.3 | -1.8 | unknown function |                                                                          |
| CA3286 | orf19.6319 | <i>UBP3.3EOC</i>  | 1.0  | 1.0  | 1.0  | -1.0 | YEL151C | <i>UBP3</i>   | 1.0  | 1.1  | 1.1  | 1.4              | Ubiquitin-specific proteinase, 3-prime end (by homology)                 |
| CA3289 | orf19.6323 | <i>HPA3</i>       | 1.0  | 1.0  | 1.1  | -1.0 | YEL066W | <i>HPA3</i>   | 1.0  | -1.1 | -1.1 | -1.2             | histone and other protein acetyltransferase(by homology)                 |
| CA3290 | orf19.6324 | <i>IPF5734</i>    | -1.4 | 1.1  | -1.1 | -1.1 | YNL212W | <i>VID27</i>  | 1.0  | -1.2 | -1.0 | -1.0             | unknown function                                                         |
| CA3291 |            | <i>IPF5730</i>    | -1.0 | 1.1  | 1.1  | 1.0  | YNL211C |               | 1.0  | -1.1 | -1.2 | -1.6             | unknown function                                                         |
| CA3294 | orf19.6328 | <i>IPF5725</i>    | 1.0  | 1.0  | 1.0  | 1.0  | YDR511W | <i>ACN9</i>   | 1.0  | -1.5 | -1.6 | -1.4             | unknown function                                                         |
| CA3300 | orf19.2315 | <i>RTG3</i>       | -1.0 | -1.2 | -1.3 | -1.2 | YBL103C | <i>RTG3</i>   | 1.0  | 1.1  | 1.0  | 1.1              | Probable bHLH/zip transcription factor that regulates CIT2 gene expressi |
| CA3301 | orf19.2314 | <i>IPF13782</i>   | -1.0 | -1.1 | -1.2 | -1.1 | YGL029W | <i>CGR1</i>   | 1.0  | 1.2  | 1.0  | 1.7              | unknown function                                                         |
| CA3306 | orf19.2310 | <i>IPF11738</i>   | 1.0  | -1.0 | -1.0 | 1.0  | YFR032C |               | 1.0  | 1.0  | -1.1 | 1.0              | unknown function                                                         |
| CA3307 |            | <i>RPL2.3</i>     | 1.0  | 1.0  | -1.2 | -1.1 | YIL018W | <i>RPL2B</i>  | 1.0  | -1.6 | -1.5 | -1.4             | ribosomal protein L8, 3-prime end (by homology)                          |
| CA3308 | orf19.9845 | <i>PET127</i>     | -1.0 | -1.1 | -1.0 | -1.0 | YOR017W | <i>PET127</i> | 1.0  | -1.3 | 1.1  | 1.1              | component of mitochondrial translation (by homology)                     |
| CA3310 | orf19.2307 | <i>PFS2</i>       | -1.0 | 1.0  | 1.2  | 1.0  | YNL317W | <i>PFS2</i>   | 1.0  | -1.0 | -1.1 | -1.1             | Polyadenylation Factor I subunit (by homology)                           |
| CA3311 | orf19.2306 | <i>IPF8809</i>    | -1.0 | -1.1 | -1.1 | -1.0 | YMR009W |               | 1.0  | -1.1 | 1.2  | 1.0              | unknown function                                                         |
| CA3312 | orf19.2305 | <i>IPF8810</i>    | 1.0  | 1.1  | -1.0 | 1.0  | YEL003W | <i>GIM4</i>   | 1.0  | 1.5  | 1.4  | 2.0              | unknown function                                                         |
| CA3314 | orf19.2303 | <i>IPF8812</i>    | -1.0 | 1.0  | 1.0  | 1.1  | YGR075C | <i>PRP38</i>  | 1.0  | -1.5 | -1.5 | -1.7             | unknown function                                                         |
| CA3316 | orf19.2301 | <i>IPF8817</i>    | 1.1  | 1.1  | 1.0  | -1.0 | YIL007C |               | 1.0  | -1.4 | -1.5 | -1.5             | putative proteasome subunit (by homology)                                |
| CA3317 | orf19.2299 | <i>URM1</i>       | 1.0  | 1.1  | 1.0  | 1.0  | YIL008W | <i>URM1</i>   | 1.0  | 1.0  | -1.2 | -1.2             | ubiquitin like protein (by homology)                                     |
| CA3318 | orf19.2298 | <i>WBP1</i>       | -1.1 | 1.1  | 1.2  | 1.4  | YEL002C | <i>WBP1</i>   | 1.0  | 1.2  | 1.6  | 1.8              | Oligosaccharyl transferase beta subunit (by homology)                    |
| CA3319 | orf19.2680 | <i>DRS25.3EOC</i> | -1.2 | 1.4  | 1.1  | 1.1  | YMR162C |               | 1.0  | -1.2 | -1.5 | -1.5             | Probable ATPase, 3-prime end (by homology)                               |
| CA3320 | orf19.2678 | <i>IPF6898</i>    | -1.2 | 1.1  | 1.1  | 1.2  | YGR188C | <i>BUB1</i>   | 1.0  | -1.2 | -1.3 | -1.3             | similar to Saccharomyces cerevisiae Bub1p serine/threonine kinase (by t  |
| CA3321 | orf19.2677 | <i>IPF6896.5F</i> | -1.2 | -1.2 | -1.3 | -1.2 | YHR188C | <i>GPI16</i>  | 1.0  | -1.1 | 1.1  | 1.1              | unknown function, 5-prime end                                            |
| CA3323 | orf19.2676 | <i>IKI1</i>       | 1.1  | 1.0  | 1.1  | 1.1  | YHR187W | <i>IKI1</i>   | 1.0  | 1.0  | 1.1  | 1.1              | killer toxin insensitive protein                                         |
| CA3324 | orf19.2675 | <i>IPF6893</i>    | 1.0  | 1.0  | -1.0 | 1.0  | YMR288W | <i>HSH155</i> | 1.0  | -1.3 | -1.3 | -1.2             | unknown function                                                         |
| CA3326 | orf19.2673 | <i>IPF6889</i>    | -1.0 | -1.1 | -1.1 | -1.0 | YDR288W |               | 1.0  | -1.4 | -1.1 | -1.2             | unknown function                                                         |
| CA3327 | orf19.2672 | <i>NCP1</i>       | -1.1 | -1.1 | -1.1 | -1.0 | YHR042W | <i>NCP1</i>   | 1.0  | 1.2  | 1.5  | 1.8              | NADPH-cytochrome P450 reductase                                          |
| CA3329 | orf19.2670 | <i>IPF12162</i>   | 1.1  | 2.0  | 2.1  | 1.7  | YHR067W |               | 1.0  | 1.1  | 1.0  | -1.1             | Unknown function                                                         |
| CA3333 | orf19.9876 | <i>CDC48</i>      | -1.1 | 1.1  | -1.1 | -1.1 | YDL126C | <i>CDC48</i>  | 1.0  | -1.1 | 1.4  | 1.1              | microsomal ATPase (by homology)                                          |
| CA3336 | orf19.2335 | <i>IPF19983</i>   | 1.0  | 1.4  | 1.6  | 1.6  | YHR113W |               | 1.0  | 1.0  | -1.1 | 1.1              | unknown function                                                         |
| CA3337 | orf19.2334 | <i>IPF13583</i>   | 1.6  | 1.1  | 1.1  | 1.1  | YHR101C | <i>BIG1</i>   | 1.0  | -1.1 | -1.1 | 1.1              | unknown function                                                         |
| CA3338 | orf19.2333 | <i>IPF13582</i>   | -1.1 | 1.1  | -1.1 | 1.1  | YHR009C |               | 1.0  | -1.3 | -1.4 | 1.2              | unknown function                                                         |
| CA3339 | orf19.2332 | <i>IPF20131</i>   | 1.0  | 1.0  | 1.0  | -1.1 | YDR446W | <i>ECM11</i>  | 1.0  | -1.3 | -1.4 | -1.3             | unknown function                                                         |
| CA3340 | orf19.2331 | <i>ADA2</i>       | -1.1 | -1.0 | -1.1 | 1.0  | YDR448W | <i>ADA2</i>   | 1.0  | -1.2 | 1.1  | 1.2              | general transcriptional adaptor or co-activator (by homology)            |
| CA3341 |            | <i>RPS17.3</i>    | 1.3  | -1.0 | 1.2  | 1.2  | YDR447C | <i>RPS17B</i> | 1.0  | -1.3 | 3.1  | 3.3              | Ribosomal protein S17, 3-prime end (by homology)                         |
| CA3342 | orf19.2330 | <i>IPF13361</i>   | -1.0 | -1.1 | 1.0  | -1.0 | YDR449C |               | 1.0  | -1.6 | -1.7 | -1.2             | unknown function                                                         |
| CA3344 | orf19.2326 | <i>IPF13359</i>   | -1.0 | -1.0 | -1.1 | 1.0  | YDR363W | <i>ESC2</i>   | 1.0  | -1.2 | -1.0 | 1.0              | unknown function                                                         |
| CA3345 | orf19.2325 | <i>IPF13357</i>   | 1.0  | 1.0  | 1.1  | 1.0  | YDR362C | <i>TFC6</i>   | 1.0  | 1.0  | 1.1  | 1.1              | unknown function                                                         |
| CA3346 | orf19.2324 | <i>IPF13356</i>   | -1.1 | 1.3  | 1.4  | 1.3  | YHR111W |               | 1.0  | -1.6 | -1.3 | -1.1             | molybdopterin biosynthesis (by homology)                                 |
| CA3347 |            | <i>ERP5</i>       | 1.0  | 1.1  | 1.1  | 1.1  | YHR110W | <i>ERP5</i>   | 1.0  | -1.8 | -1.6 | -1.4             | protein involved in membrane trafficking (by homology)                   |
| CA3348 | orf19.2320 | <i>RIO1</i>       | 1.1  | -1.1 | -1.1 | -1.1 | YOR119C | <i>RIO1</i>   | 1.0  | -1.1 | 1.3  | 1.4              | unknown function                                                         |
| CA3349 |            | <i>IPF19588</i>   | 1.1  | 1.1  | 1.4  | 1.2  | YDR367W |               | 1.0  | -1.0 | -1.0 | 1.1              | unknown function                                                         |
| CA3352 | orf19.9501 | <i>IPF16194</i>   | 1.0  | -1.0 | -1.1 | -1.0 | YMR099C |               | 1.0  | 1.0  | -1.0 | -1.3             | unknown function                                                         |
| CA3353 | orf19.9500 | <i>AUR1</i>       | 1.3  | 1.2  | 1.6  | 1.2  | YKL004W | <i>AUR1</i>   | 1.0  | 1.1  | 1.0  | 1.2              | aureobasidin-resistance protein                                          |
| CA3354 | orf19.9499 | <i>IPF11281</i>   | -1.0 | -1.1 | -1.0 | -1.1 | YDL035C | <i>GPR1</i>   | 1.0  | -1.1 | 1.2  | 1.4              | similar to Saccharomyces cerevisiae Gpr1p G-protein coupled receptor (l  |
| CA3357 | orf19.1941 | <i>IPF9562</i>    | -1.0 | 1.0  | 1.0  | -1.0 | YOL069W | <i>NUF2</i>   | 1.0  | -1.0 | -1.1 | -1.2             | similar to Saccharomyces cerevisiae Nuf2pspindle pole body protein       |
| CA3358 | orf19.1940 | <i>IPF19984</i>   | 1.1  | 1.2  | 1.1  | 1.0  | YOR125C | <i>CAT5</i>   | 1.0  | -1.4 | -1.4 | -1.6             | similar to Saccharomyces cerevisiae Cat5p involved in coenzyme Q (ubiq   |
| CA3359 | orf19.1939 | <i>IPF9566</i>    | -1.0 | -1.1 | 1.1  | -1.1 | YDR374C |               | 1.0  | -1.3 | -1.5 | -1.3             | unknown function                                                         |
| CA3361 | orf19.9491 | <i>SNF1</i>       | -1.1 | -1.1 | -1.1 | -1.1 | YDR477W | <i>SNF1</i>   | 1.0  | 1.1  | 1.3  | 1.5              | serine/threonine protein kinase                                          |
| CA3362 | orf19.9489 | <i>IPF9789</i>    | -1.2 | -1.1 | -1.2 | -1.1 | YDR479C |               | 1.0  | 1.2  | 1.3  | 1.2              | unknown function                                                         |
| CA3363 | orf19.9488 | <i>FRE32</i>      | 1.1  | 1.0  | 1.0  | 1.0  | YOR381W | <i>FRE3</i>   | 1.0  | -1.1 | -1.1 | -1.1             | ferric reductase (by homology)                                           |
| CA3365 | orf19.1843 | <i>ALG6</i>       | 1.3  | 1.8  | 2.5  | 2.1  | YOR002W | <i>ALG6</i>   | 1.0  | -1.4 | -1.3 | -1.3             | glucosyltransferase (by homology)                                        |
| CA3367 | orf19.9405 | <i>IPF4667</i>    | -1.2 | -1.9 | -2.5 | -1.3 | YDR380W | <i>ARO10</i>  | 1.0  | 1.1  | 1.3  | -1.0             | unknown Function                                                         |
| CA3368 | orf19.1849 | <i>IPF4671</i>    | -1.1 | -1.1 | 1.1  | -1.0 | YIL091C |               | 1.0  | -1.1 | 1.0  | 1.3              | unknown Function                                                         |
| CA3369 | orf19.1850 | <i>IPF4672</i>    | -1.0 | -1.0 | -1.0 | -1.1 | YNL032W | <i>SIW14</i>  | 1.0  | -1.0 | 1.0  | -1.0             | unknown Function                                                         |
| CA3370 | orf19.1852 | <i>IPF4674</i>    | 1.1  | 1.0  | 1.1  | 1.1  | YIL087C |               | 1.0  | -1.2 | -1.2 | -1.6             | unknown Function                                                         |
| CA3374 | orf19.1856 | <i>IPF4683</i>    | -1.0 | -1.1 | 1.0  | -1.0 | YIL084C | <i>SDS3</i>   | 1.0  | -1.5 | -1.4 | -1.4             | unknown Function                                                         |
| CA3377 | orf19.7964 | <i>CLF1</i>       | -1.0 | -1.1 | 1.0  | -1.0 | YLR117C | <i>CLF1</i>   | 1.0  | -1.6 | -1.5 | -1.2             | pre-mRNA splicing factor (by homology)                                   |
| CA3379 | orf19.331  | <i>IPF8350</i>    | 1.1  | 1.1  | -1.0 | 1.0  | YDR140W | <i>FYV9</i>   | 1.0  | -1.2 | -1.1 | -1.0             | putative methyltransferase (by homology)                                 |
| CA3380 | orf19.329  | <i>MSL5</i>       | 1.0  | -1.0 | 1.0  | 1.0  | YLR116W | <i>MSL5</i>   | 1.0  | -2.0 | -1.5 | -1.5             | branch point bridging protein (by homology)                              |
| CA3381 | orf19.328  | <i>NPR2</i>       | -1.2 | -1.2 | -1.2 | -1.2 | YEL062W | <i>NPR2</i>   | 1.0  | -1.2 | -1.0 | -1.2             | nitrogen permease regulator (by homology)                                |
| CA3382 | orf19.327  | <i>HTA3</i>       | 1.2  | 1.2  | 1.4  | 1.5  | YOL012C | <i>HTZ1</i>   | 1.0  | -1.2 | -1.2 | -1.1             | histone H2A F/Z variant (by homology)                                    |
| CA3384 | orf19.325  | <i>IPF8362</i>    | -1.2 | -1.2 | -1.7 | -1.3 | YLR115W | <i>CFT2</i>   | 1.0  | -1.1 | -1.2 | -1.1             | similar to Saccharomyces cerevisiae Cft2p involved in cleavage and poly  |

|        |             |                     |      |      |      |      |         |               |     |      |      |      |                                                                                |
|--------|-------------|---------------------|------|------|------|------|---------|---------------|-----|------|------|------|--------------------------------------------------------------------------------|
| CA3387 | orf19.7953  | <i>MUP3</i>         | -1.0 | 1.2  | 1.4  | 1.2  | YHL036W | <i>MUP3</i>   | 1.0 | -1.1 | 1.3  | -1.0 | Very low affinity methionine permease                                          |
| CA3389 | orf19.7951  | <i>IPF6754</i>      | 1.0  | -1.0 | 1.1  | 1.0  | YDR286C |               | 1.0 | -1.8 | -1.7 | -2.1 | unknown function                                                               |
| CA3390 |             | <i>CAF17</i>        | 1.1  | -1.0 | -1.1 | 1.0  | YJR122W | <i>CAF17</i>  | 1.0 | 1.2  | 1.3  | 1.7  | Component of CCR4 transcriptional complex                                      |
| CA3391 | orf19.7949  | <i>PNP1</i>         | 1.0  | -1.0 | 1.0  | 1.1  | YLR209C | <i>PNP1</i>   | 1.0 | -1.1 | -1.0 | -1.2 | Purine Nucleoside Phosphorylase (by homology)                                  |
| CA3392 | orf19.316   | <i>SEC13</i>        | -1.0 | 1.0  | -1.1 | 1.1  | YLR208W | <i>SEC13</i>  | 1.0 | 1.1  | 1.1  | 1.2  | Protein transport protein                                                      |
| CA3393 | orf19.315   | <i>IPF6748</i>      | -1.1 | -1.0 | -1.1 | -1.0 | YMR052W | <i>FAR3</i>   | 1.0 | -1.5 | -1.4 | -1.5 | unknown function                                                               |
| CA3394 | orf19.7946  | <i>IPF6747</i>      | -1.0 | -1.0 | -1.0 | 1.0  | YMR053C | <i>STB2</i>   | 1.0 | -1.5 | -1.6 | -1.8 | similar to <i>Saccharomyces cerevisiae</i> Stb2p involved Sin3p binding (by hc |
| CA3395 | orf19.3970  | <i>IPF13616</i>     | -1.1 | 1.0  | -1.0 | -1.0 | YGR251W |               | 1.0 | -1.3 | -1.4 | -1.0 | unknown function                                                               |
| CA3397 | orf19.3972  | <i>IPF13618</i>     | 1.1  | 1.0  | 1.0  | 1.1  | YMR292W | <i>GOT1</i>   |     |      |      |      | unknown function                                                               |
| CA3398 | orf19.3973  | <i>IPF13621</i>     | 1.0  | 1.0  | -1.0 | 1.0  | YGR268C |               | 1.0 | 1.1  | 1.3  | 1.2  | unknown function                                                               |
| CA3399 | orf19.3974  | <i>PUT2</i>         | -1.3 | -8.3 | -9.8 | -7.1 | YHR037W | <i>PUT2</i>   | 1.0 | -1.2 | -1.2 | 1.2  | 1-pyrroline-5-carboxylate dehydrogenase (by homology)                          |
| CA3400 | orf19.3976  | <i>JNM1</i>         | -1.0 | -1.1 | -1.0 | -1.1 | YMR294W | <i>JNM1</i>   | 1.0 | -1.3 | -1.6 | -1.8 | mitosis protein, involved in nuclear migration (by homology)                   |
| CA3401 | orf19.3977  | <i>IPF8652</i>      | -1.0 | -1.0 | -1.1 | 1.0  | YGR173W |               | 1.0 | -1.9 | -1.7 | -1.5 | putative GTP-binding protein (by homology)                                     |
| CA3402 | orf19.3978  | <i>IPF8651</i>      | -1.0 | 1.0  | -1.0 | -1.2 | YGR272C |               | 1.0 | -1.3 | -1.1 | 1.0  | unknown function                                                               |
| CA3403 | orf19.3980  | <i>IPF8650</i>      | -1.2 | 1.2  | -1.1 | 1.1  | YGR271W | <i>SLH1</i>   | 1.0 | -1.4 | -1.5 | -1.3 | RNA helicase (by homology)                                                     |
| CA3404 | orf19.3981  | <i>MAL31</i>        | 1.0  | -1.9 | -2.4 | -1.6 | YBR298C | <i>MAL31</i>  | 1.0 | 1.5  | 1.3  | 1.2  | maltose permease (by homology)                                                 |
| CA3405 | orf19.3982  | <i>IPF8644</i>      | 1.0  | 1.0  | 1.0  | -1.0 | YGR287C |               | 1.0 | -1.1 | -1.2 | 1.1  | maltase (by homology)                                                          |
| CA3406 | orf19.3983  | <i>IPF9711</i>      | 1.0  | 1.1  | -1.0 | 1.0  | YGR266W |               | 1.0 | -1.2 | -1.0 | 1.1  | unknown function                                                               |
| CA3408 | orf19.6151  | <i>IPF9407</i>      | 1.2  | -1.1 | -1.1 | 1.0  | YIL062C | <i>ARC15</i>  | 1.0 | 1.5  | 1.6  | 1.4  | similar to <i>Saccharomyces cerevisiae</i> Arc15p subunit of the ARP2/3 comp   |
| CA3409 | orf19.6148  | <i>IPF9410</i>      | -1.0 | -1.0 | -1.1 | -1.1 | YDR356W | <i>NUF1</i>   | 1.0 | -3.6 | -4.2 | -3.4 | similar to <i>Saccharomyces cerevisiae</i> Nuf1p spindle pole body componen    |
| CA3410 | orf19.6147  | <i>IPF9411</i>      | -1.1 | -1.1 | -1.0 | -1.0 | YER030W |               | 1.0 | -1.3 | -1.1 | -1.5 | unknown function                                                               |
| CA3411 | orf19.13565 | <i>IPF9413</i>      | 1.1  | 1.1  | 1.3  | 1.2  | YGL215W | <i>CLG1</i>   | 1.0 | -1.5 | -1.4 | -1.1 | unknown function                                                               |
| CA3419 | orf19.6136  | <i>IPF12778</i>     | 1.1  | -1.3 | -1.3 | -1.1 | YLR439W | <i>MRPL4</i>  | 1.0 | -1.7 | -2.1 | -2.1 | ribosomal protein, mitochondrial (by homology)                                 |
| CA3422 | orf19.13553 | <i>IPF17289</i>     | -1.2 | 1.1  | 1.1  | 1.1  | YLR440C |               | 1.0 | 1.0  | 1.1  | 1.1  | unknown function                                                               |
| CA3425 | orf19.593   | <i>IPF11873</i>     | -1.3 | -1.1 | -1.3 | -1.2 | YDR320C | <i>SWA2</i>   | 1.0 | -1.3 | 1.1  | 1.1  | similar to <i>Saccharomyces cerevisiae</i> Swa2p clathrin-binding protein requ |
| CA3426 | orf19.592   | <i>IPF11869</i>     | -1.0 | 1.1  | 1.1  | -1.0 | YNL092W |               | 1.0 | -1.2 | -1.1 | -1.1 | unknown function                                                               |
| CA3429 | orf19.588   | <i>IPF6380</i>      | 1.1  | 1.1  | -1.0 | -1.1 | YDR031W |               | 1.0 | -1.2 | -1.5 | -1.4 | unknown function                                                               |
| CA3430 | orf19.587   | <i>IPF6382</i>      | 1.0  | -1.0 | 1.0  | 1.0  | YNL253W |               | 1.0 | 1.0  | 1.2  | 1.1  | unknown function                                                               |
| CA3431 | orf19.586   | <i>FUN9</i>         | 1.0  | 1.0  | 1.3  | 1.1  | YAL042W | <i>ERV46</i>  | 1.0 | -1.3 | -1.4 | -1.2 | Protein involved in vesicular transport between the endoplasmic reticulum      |
| CA3432 | orf19.585   | <i>MRPL17</i>       | 1.1  | -1.0 | 1.2  | 1.1  | YNL252C | <i>MRPL17</i> | 1.0 | -1.0 | 1.1  | -1.1 | ribosomal protein of the large subunit (YmL30), mitochondrial                  |
| CA3434 | orf19.584   | <i>CCP1</i>         | 1.1  | 1.1  | 1.1  | 1.0  | YKR066C | <i>CCP1</i>   | 1.0 | 1.3  | 1.5  | 1.2  | Cytochrome-c peroxidase precursor (by homology)                                |
| CA3435 | orf19.583   | <i>IPF6391</i>      | 1.0  | -1.1 | -1.1 | -1.0 | YJR078W |               | 1.0 | -1.1 | -1.1 | 1.1  | similarity to mammalian indoleamine 2,3-dioxygenase (by homology)              |
| CA3436 | orf19.581   | <i>NRD1</i>         | -1.0 | 1.0  | 1.0  | 1.0  | YNL251C | <i>NRD1</i>   | 1.0 | -1.3 | -1.1 | -1.2 | Involved in regulation of nuclear pre-mRNA abundance                           |
| CA3438 | orf19.2987  | <i>IPF11330</i>     | -1.2 | -1.1 | -1.2 | -1.1 | YHR194W |               | 1.0 | 1.2  | 1.3  | 1.3  | unknown function                                                               |
| CA3441 | orf19.2984  | <i>MST1</i>         | -1.1 | -1.0 | -1.1 | -1.0 | YKL194C | <i>MST1</i>   | 1.0 | -1.1 | -1.2 | -1.4 | mitochondrial threonyl tRNA synthetase [ <i>Candida albicans</i> ]             |
| CA3442 | orf19.2983  | <i>IPF11326</i>     | -1.1 | -1.1 | -1.1 | -1.0 | YLR418C | <i>CDC73</i>  | 1.0 | -1.6 | -1.7 | -1.7 | similar to <i>Saccharomyces cerevisiae</i> (by homology)                       |
| CA3443 | orf19.2982  | <i>IPF11324</i>     | 1.0  | 1.1  | 1.0  | 1.0  | YLR423C | <i>APG17</i>  | 1.0 | -1.1 | -1.2 | -1.5 | unknown function                                                               |
| CA3444 | orf19.2980  | <i>IPF11323</i>     | -1.1 | -1.1 | -1.1 | -1.0 | YLR424W |               | 1.0 | -1.1 | 1.3  | 1.4  | unknown function                                                               |
| CA3446 | orf19.2977  | <i>IPF7324</i>      | -1.1 | -1.1 | -1.2 | -1.1 | YKL195W |               | 1.0 | -1.2 | -1.2 | -1.1 | unknown function                                                               |
| CA3448 | orf19.2974  | <i>YKT6</i>         | -1.1 | -1.1 | -1.1 | -1.1 | YKL196C | <i>YKT6</i>   | 1.0 | -1.1 | -1.3 | -1.4 | Endoplasmic Reticulum-Golgi transport (by homology)                            |
| CA3449 | orf19.2973  | <i>IPF7320</i>      | 1.0  | -1.1 | -1.0 | 1.0  | YOR359W |               | 1.0 | -1.6 | -1.6 | -1.6 | unknown function                                                               |
| CA3450 | orf19.2972  | <i>PDE2</i>         | -1.0 | 1.1  | -1.0 | 1.0  | YOR360C | <i>PDE2</i>   | 1.0 | 1.1  | -1.1 | 1.3  | Nucleotide phosphodiesterase                                                   |
| CA3452 | orf19.1253  | <i>IPF10541</i>     | -1.1 | -1.1 | -1.1 | -1.1 | YFR034C | <i>PHO4</i>   | 1.0 | 1.1  | 1.3  | 1.4  | unknown function                                                               |
| CA3453 | orf19.1254  | <i>SEC23</i>        | -1.1 | 1.2  | 1.0  | 1.0  | YPR181C | <i>SEC23</i>  | 1.0 | -1.8 | -1.2 | 1.2  | Component of COPII coat (by homology)                                          |
| CA3456 | orf19.1259  | <i>IPF19986</i>     | -1.0 | 1.0  | -1.3 | -1.1 | YGL131C |               | 1.0 | -1.2 | -1.3 | -1.3 | unknown function                                                               |
| CA3457 | orf19.1260  | <i>IPF8521</i>      | 1.0  | -1.0 | 1.1  | -1.0 | YPL213W | <i>LEA1</i>   | 1.0 | -1.1 | -1.2 | -1.2 | unknown function                                                               |
| CA3459 | orf19.1261  | <i>CGT1.3F</i>      | 1.0  | -1.1 | -1.0 | 1.0  | YGL130W | <i>CEG1</i>   | 1.0 | -1.4 | -1.4 | -1.2 | mRNA capping enzyme alpha subunit, 3-prime end                                 |
| CA3462 | orf19.1265  | <i>IPF14959</i>     | -1.2 | -1.1 | -1.3 | -1.1 | YMR218C | <i>TRS130</i> | 1.0 | -1.3 | -1.1 | 1.2  | similar to <i>Saccharomyces cerevisiae</i> Trs130p TRAPP subunit of 130 kDa    |
| CA3463 | orf19.1659  | <i>ALG8</i>         | 1.2  | 1.2  | 1.5  | 1.2  | YOR067C | <i>ALG8</i>   | 1.0 | -1.3 | -1.1 | -1.1 | glucosyltransferase (by homology)                                              |
| CA3464 | orf19.1661  | <i>DBP5</i>         | -1.2 | -1.2 | -1.2 | -1.1 | YOR046C | <i>DBP5</i>   | 1.0 | -1.2 | -1.0 | 1.1  | RNA helicase (by homology)                                                     |
| CA3465 |             | <i>MRP1.3F</i>      | -1.0 | -1.1 | -1.1 | 1.0  | YDR347W | <i>MRP1</i>   | 1.0 | -1.5 | -1.5 | -1.2 | Mitochondrial ribosomal protein of the small subunit, 3-prime end (by hon      |
| CA3467 | orf19.1663  | <i>MNT2</i>         | 1.0  | -1.0 | 1.1  | 1.1  | YDR483W | <i>KRE2</i>   | 1.0 | -1.7 | -1.4 | -1.4 | Alpha-1,2-mannosyltransferase (by homology)                                    |
| CA3469 | orf19.1665  | <i>MNT1</i>         | -1.2 | 1.1  | 1.2  | 1.1  | YOR099W | <i>KTR1</i>   | 1.0 | -1.2 | -1.1 | 1.1  | Mannosyltransferase involved in n-linked and o-linked glycosylation            |
| CA3472 |             | <i>IPF6305.EXON</i> | 1.1  | 1.1  | -1.0 | 1.0  | YLR218C |               | 1.0 | -1.1 | 1.1  | 1.1  | unknown function, exon 2                                                       |
| CA3473 | orf19.1668  | <i>F6305.EXON</i>   | 1.0  | -1.1 | -1.0 | -1.1 | YDL139C | <i>SCM3</i>   | 1.0 | -1.1 | -1.4 | -1.4 | unknown function, exon 1                                                       |
| CA3474 | orf19.1669  | <i>AFG3</i>         | -1.3 | -1.5 | -1.8 | -1.5 | YER017C | <i>AFG3</i>   | 1.0 | 1.1  | 1.2  | 1.2  | Member of the Sec18p, Pas1p, Cdc48p, TBP-1 family of ATPases (by hc            |
| CA3475 | orf19.1670  | <i>BRO1</i>         | 1.0  | 1.0  | -1.0 | 1.0  | YPL084W | <i>BRO1</i>   | 1.0 | 1.1  | 1.1  | 1.3  | required for normal response to nutrient limitation (by homology)              |
| CA3476 | orf19.3583  | <i>NUP2.3EOC</i>    | -1.0 | -1.1 | -1.1 | -1.0 | YIL063C | <i>YRB2</i>   | 1.0 | -1.0 | -1.1 | 1.0  | nucleoporine involved in nuclear protein export, 3-prime end (by homoloc       |
| CA3477 | orf19.3582  | <i>IPF3229</i>      | 1.0  | -1.0 | -1.1 | -1.1 | YIL064W |               | 1.0 | -1.4 | -1.7 | -1.5 | unknown function                                                               |
| CA3478 | orf19.3581  | <i>IPF3227</i>      | 1.0  | -1.0 | -1.1 | 1.0  | YBR195C | <i>MSI1</i>   | 1.0 | -1.1 | -1.1 | 1.6  | similar to <i>Saccharomyces cerevisiae</i> chromatin assembly complex, subu    |
| CA3479 | orf19.3579  | <i>ATP4</i>         | -1.2 | -1.4 | -1.6 | -1.4 | YPL078C | <i>ATP4</i>   | 1.0 | -1.0 | -1.1 | -1.9 | F1F0-ATPase complex, F0 subunit B (by homology)                                |

|        |            |            |      |      |      |      |         |       |     |      |      |      |                                                                            |
|--------|------------|------------|------|------|------|------|---------|-------|-----|------|------|------|----------------------------------------------------------------------------|
| CA3482 | orf19.3577 | COQ5       | 1.1  | 1.0  | -1.0 | 1.0  | YML110C | COQ5  | 1.0 | -1.1 | 1.1  | -1.2 | C-methyltransferase (by homology)                                          |
| CA3483 | orf19.3575 | CDC19      | -1.1 | 3.2  | 2.1  | 4.2  | YAL038W | CDC19 | 1.0 | 2.3  | 3.6  | 5.4  | pyruvate kinase (by homology)                                              |
| CA3484 | orf19.3574 | IPF3214    | 1.0  | 1.1  | -1.0 | -1.0 | YNL328C | MDJ2  | 1.0 | -1.1 | -1.0 | -1.0 | HSP-mitochondrial chaperone (by homology)                                  |
| CA3485 | orf19.3573 | IPF3213    | -1.7 | -3.2 | -4.4 | -3.0 | YNL329C | PEX6  | 1.0 | -1.1 | -1.1 | -1.2 | similar to Saccharomyces cerevisiae Pex6p peroxisomal assembly protei      |
| CA3487 | orf19.3569 | IPF3203    | -1.2 | -1.4 | -1.5 | -1.2 | YLR407W |       | 1.0 | -1.9 | -2.1 | -2.1 | unknown function                                                           |
| CA3488 | orf19.3568 | IPF3198    | -1.1 | -1.0 | -1.0 | -1.0 | YDL076C |       | 1.0 | 1.0  | -1.0 | -1.2 | unknown function                                                           |
| CA3491 | orf19.3564 | RPC40      | 1.1  | 1.0  | 1.0  | 1.0  | YPR110C | RPC40 | 1.0 | 1.5  | 2.0  | 2.6  | RNA polymerase (by homology)                                               |
| CA3493 | orf19.3561 | CDC7       | -1.1 | 1.1  | 1.0  | 1.0  | YDL017W | CDC7  | 1.0 | -1.0 | 1.1  | 1.0  | serine/threonine protein kinase (by homology)                              |
| CA3494 | orf19.6340 | RPB5       | 1.1  | 1.0  | 1.1  | -1.0 | YBR154C | RPB5  | 1.0 | -1.2 | -1.3 | 1.0  | DNA-directed RNA polymerase I, II, III (by homology)                       |
| CA3495 | orf19.6341 | RIB7       | -1.4 | -1.1 | -1.3 | -1.1 | YBR153W | RIB7  | 1.0 | -1.7 | -1.4 | -1.3 | HTP reductase (By homology)                                                |
| CA3497 | orf19.6343 | FEN1       | 1.5  | 1.6  | 2.1  | 1.8  | YCR034W | FEN1  | 1.0 | 1.5  | 1.9  | 2.4  | Fatty acid elongase required for sphingolipid formation (by homology)      |
| CA3498 | orf19.6344 | RBK1       | -1.1 | -1.3 | -1.4 | -1.3 | YCR036W | RBK1  | 1.0 | -1.1 | -1.4 | -1.3 | Ribokinase (by homology)                                                   |
| CA3499 | orf19.6345 | RPG1       | -1.5 | -1.3 | -1.9 | -1.5 | YBR079C | RPG1  | 1.0 | -1.2 | 1.6  | 1.7  | Translation initiation factor eIF3 (by homology)                           |
| CA3500 | orf19.6346 | IPF14487   | -1.1 | 1.0  | 1.0  | -1.0 | YDR361C | BCP1  | 1.0 | 1.1  | 1.5  | 1.5  | unknown function                                                           |
| CA3501 | orf19.6347 | CDC40      | -1.0 | 1.1  | -1.0 | 1.0  | YDR364C | CDC40 | 1.0 | -1.4 | -1.2 | -1.1 | cell division control protein (by homology)                                |
| CA3508 | orf19.6355 | RSA2       | -1.1 | -1.1 | -1.2 | -1.1 | YMR131C | RRB1  | 1.0 | 1.1  | 1.5  | 2.0  | Involved in ribosome biogenesis (by homology)                              |
| CA3509 | orf19.6356 | PRP6       | -1.1 | -1.1 | -1.1 | -1.1 | YBR055C | PRP6  | 1.0 | -1.1 | -1.1 | -1.0 | snRNP(U4/U6)-associated splicing factor (by homology)                      |
| CA3510 | orf19.6357 | MAD1       | -1.0 | 1.0  | -1.0 | 1.0  | YGL086W | MAD1  | 1.0 | -1.4 | -1.2 | -1.1 | coiled-coil protein involved in the spindle-assembly checkpoint (by homol  |
| CA3511 | orf19.6358 | MMS2       | 1.0  | 1.0  | 1.2  | 1.0  | YGL087C | MMS2  | 1.0 | 1.2  | 1.4  | 1.1  | ubiquitin-conjugating enzyme (by homology)                                 |
| CA3514 | orf19.6362 | IPF11245   | -1.3 | -1.4 | -2.1 | -1.5 | YLL021W | SPA2  | 1.0 | -1.3 | -1.1 | -1.0 | similar to Saccharomyces cerevisiae Spa2p involved in cell polarity (by h  |
| CA3524 | orf19.992  | LKH1.3     | -1.3 | -1.0 | -1.1 | -1.2 | YNL045W |       | 1.0 | -1.1 | -1.1 | -1.4 | PROBABLE LEUKOTRIENE A-4 HYDROLASE (LTA-4 HYDROLASE) (L                    |
| CA3525 | orf19.8606 | DJP1       | 1.0  | -1.1 | -1.2 | -1.1 | YIR004W | DJP1  | 1.0 | -1.2 | -1.2 | -1.3 | DnaJ-like protein involved in peroxisome biogenesis (by homology)          |
| CA3526 | orf19.8604 | MRPS5      | -1.0 | -1.3 | -1.3 | -1.2 | YBR251W | MRPS5 | 1.0 | 1.1  | 1.1  | -1.0 | Probable ribosomal protein S5, mitochondrial (by homology)                 |
| CA3527 | orf19.8603 | IPF9934    | 1.2  | 1.6  | 2.4  | 1.5  | YGR149W |       | 1.0 | 1.6  | 2.0  | 2.2  | unknown function                                                           |
| CA3529 | orf19.8600 | IPF9929    | -1.0 | -1.1 | -1.2 | -1.0 | YEL043W |       | 1.0 | -1.3 | 1.2  | 1.6  | unknown function                                                           |
| CA3532 | orf19.6365 | IPF13448   | 1.0  | -1.0 | 1.0  | 1.0  | YDL230W | PTP1  | 1.0 | 1.1  | -1.0 | -1.3 | similar to Saccharomyces Ptp1p protein tyrosine phosphatase (by homol      |
| CA3534 | orf19.6367 | SSB1       | -1.1 | 1.0  | -1.1 | -1.2 | YNL209W | SSB2  | 1.0 | 1.3  | 1.5  | 2.3  | heat shock protein 70                                                      |
| CA3535 | orf19.6369 | IPF13458   | -1.1 | -1.1 | -1.1 | -1.1 | YNL207W |       | 1.0 | 1.1  | 1.1  | 1.1  | unknown function                                                           |
| CA3537 | orf19.6373 | PSU1       | -1.1 | -1.1 | -1.3 | -1.1 | YNL118C | DCP2  | 1.0 | -1.0 | 1.3  | 1.5  | suppressor of petit mutations by homology                                  |
| CA3538 | orf19.6374 | ATP10      | -1.1 | -1.1 | -1.2 | -1.0 | YLR393W | ATP10 | 1.0 | 1.1  | 1.0  | 1.0  | F1F0 ATPase complex assembly protein (by homology)                         |
| CA3539 | orf19.6375 | RPS22      | -1.2 | -1.3 | -1.2 | -1.2 | YHL015W | RPS20 | 1.0 | 1.1  | 2.1  | 1.6  | ribosomal protein by homology                                              |
| CA3540 | orf19.6376 | PTC5       | -1.2 | -1.0 | -1.0 | 1.0  | YOR090C | PTC5  | 1.0 | -1.1 | 1.1  | 1.1  | Type 2C Protein Phosphatase by homology                                    |
| CA3541 | orf19.6377 | IPF5425    | 1.1  | 1.0  | -1.1 | -1.0 | YDR435C | PPM1  | 1.0 | -1.6 | -1.4 | -1.5 | similar to Saccharomyces cerevisiae Ppm1p carboxy methyltransferase (      |
| CA3542 | orf19.6378 | IPF5426    | 1.0  | -1.0 | -1.0 | 1.0  | YML014W |       | 1.0 | -1.4 | -1.6 | -1.0 | putative methyltransferase (by homology)                                   |
| CA3546 | orf19.6385 | ACO1       | 1.2  | 1.1  | -1.1 | -1.4 | YLR304C | ACO1  | 1.0 | -2.8 | -3.8 | -8.9 | aconitate hydratase (by homology)                                          |
| CA3547 | orf19.3870 | ADE13      | 1.1  | -1.2 | -1.1 | -1.1 | YLR359W | ADE13 | 1.0 | -1.1 | 1.1  | 1.7  | adenylosuccinate lyase (by homology)                                       |
| CA3548 | orf19.3872 | IPF12179   | 1.0  | -1.1 | -1.0 | -1.0 | YGR026W |       | 1.0 | -1.1 | 1.1  | -1.1 | unknown function                                                           |
| CA3549 | orf19.3873 | ARC40      | 1.1  | -1.1 | 1.1  | 1.1  | YBR234C | ARC40 | 1.0 | -1.4 | -1.6 | -1.6 | subunit of the Arp2/3 complex involved in the control of actin polymerizat |
| CA3551 | orf19.3876 | IPF13229   | 1.1  | 1.0  | 1.1  | -1.0 | YDR520C |       | 1.0 | -2.3 | -1.9 | -1.8 | unknown function                                                           |
| CA3554 | orf19.3881 | IPF7770    | 1.1  | 1.1  | -1.0 | 1.0  | YOL053W |       | 1.0 | 1.0  | 1.0  | -1.3 | unknown function                                                           |
| CA3559 | orf19.3888 | PGI1       | 1.0  | 1.7  | 1.8  | 1.7  | YBR196C | PGI1  | 1.0 | -1.4 | 1.1  | 1.7  | Glucose-6-phosphate isomerase                                              |
| CA3561 | orf19.3128 | SLY1       | -1.1 | 1.0  | -1.1 | -1.0 | YDR189W | SLY1  | 1.0 | -1.1 | -1.1 | -1.1 | hydrophilic suppressor of YPT1 and member of the Sec1p family (by hon      |
| CA3562 | orf19.3129 | IPF7823    | -1.2 | -1.2 | -1.3 | -1.1 | YDR190C | RVB1  | 1.0 | 1.3  | 1.8  | 1.8  | similar to Saccharomyces cerevisiae Rvb1p RuvB-like protein (by homol      |
| CA3563 | orf19.3130 | IPF7819    | -1.0 | 1.0  | 1.0  | -1.0 | YLR243W |       | 1.0 | -1.7 | -1.1 | 1.2  | unknown function                                                           |
| CA3565 | orf19.3132 | MSC2       | 1.2  | 1.2  | 1.3  | 1.2  | YDR205W | MSC2  | 1.0 | -2.4 | -1.7 | -1.2 | Probable membrane protein                                                  |
| CA3566 | orf19.3133 | GUT2       | 1.1  | -1.6 | -1.6 | -1.8 | YIL155C | GUT2  | 1.0 | -1.8 | -2.8 | -5.1 | Glycerol-3-phosphate dehydrogenase, mitochondrial (by homology)            |
| CA3568 | orf19.3135 | IPF7804.3F | -1.1 | -1.1 | -1.2 | -1.0 | YML013W |       | 1.0 | -1.6 | -2.0 | -1.8 | unknown function, 3-prime end                                              |
| CA3570 | orf19.3138 | NOP1       | 1.1  | 1.2  | 1.1  | 1.1  | YDL014W | NOP1  | 1.0 | 1.7  | 1.8  | 4.4  | Fibrillarin                                                                |
| CA3573 | orf19.2267 | RFA2       | -1.1 | -1.0 | -1.1 | -1.0 | YNL312W | RFA2  | 1.0 | -1.0 | -1.1 | -1.1 | DNA replication factor by homology to S. cerevisiae                        |
| CA3574 | orf19.2266 | IPF19584   | 1.1  | -1.0 | -1.1 | -1.1 | YFR013W | IOC3  | 1.0 | -1.3 | -1.5 | -1.5 | unknown function                                                           |
| CA3575 | orf19.2265 | IPF11108   | -1.0 | 1.0  | -1.1 | -1.0 | YCR052W | RSC6  | 1.0 | -1.4 | 1.0  | 1.1  | unknown function                                                           |
| CA3578 | orf19.2262 | IPF11105   | 1.1  | 1.1  | 1.1  | 1.0  | YBR046C | ZTA1  | 1.0 | 1.0  | -1.1 | 1.0  | probable quinone oxidoreductase                                            |
| CA3579 | orf19.2261 | HSH49      | 1.0  | 1.2  | 1.2  | 1.3  | YOR319W | HSH49 | 1.0 | -1.2 | -1.2 | -1.2 | spliceosome-associated essential protein [Candida albicans]                |
| CA3580 | orf19.2260 | IPF16141   | 1.0  | -1.0 | -1.0 | -1.2 | YHR040W |       | 1.0 | 1.2  | 1.2  | 1.2  | unknown function                                                           |
| CA3583 | orf19.2257 | IPF20137   | -1.0 | -1.2 | -1.2 | -1.2 | YNR021W |       | 1.0 | -1.1 | 1.1  | 1.1  | unknown function                                                           |
| CA3584 | orf19.2256 | IPF15468   | 1.0  | -1.0 | -1.1 | -1.1 | YCR051W |       | 1.0 | -1.4 | -1.0 | 1.2  | unknown function                                                           |
| CA3587 | orf19.2251 | AAH1       | 1.1  | 1.3  | 1.2  | 1.2  | YNL141W | AAH1  | 1.0 | -1.0 | 1.4  | 2.0  | adenosine deaminase (by homology)                                          |
| CA3588 | orf19.2250 | SPE3       | 1.2  | 1.1  | 1.1  | 1.0  | YPR069C | SPE3  | 1.0 | -2.4 | -2.2 | -1.8 | putrescine aminopropyltransferase by homology                              |
| CA3589 | orf19.2249 | IPF10113   | 1.1  | 1.0  | -1.1 | 1.0  | YNR020C |       | 1.0 | -1.0 | -1.1 | -1.1 | unknown function                                                           |
| CA3590 | orf19.2248 | ARE2       | 1.2  | 2.2  | 3.6  | 3.0  | YNR019W | ARE2  | 1.0 | -1.5 | -1.2 | -1.0 | acyl-CoA sterol acyltransferase-like (by homology)                         |
| CA3592 | orf19.2246 | IPF12900   | 1.0  | 1.0  | 1.0  | 1.0  | YPL199C |       | 1.0 | 1.3  | 1.4  | 1.4  | unknown function                                                           |



|        |             |             |      |      |      |      |         |        |     |      |      |      |                                                                             |
|--------|-------------|-------------|------|------|------|------|---------|--------|-----|------|------|------|-----------------------------------------------------------------------------|
| CA3593 | orf19.2245  | YPT71       | 1.2  | 1.1  | 1.0  | 1.1  | YML001W | YPT7   | 1.0 | -1.1 | 1.1  | 1.2  | GTP-binding protein of the RAB family (by homology)                         |
| CA3594 | orf19.4922  | IPF6076.3   | 1.0  | 1.0  | 1.1  | 1.1  | YGL161C |        | 1.0 | -1.2 | -1.1 | -1.3 | unknown function, 3-prime end                                               |
| CA3597 | orf19.4927  | BNI1        | -1.1 | -1.0 | -1.2 | -1.0 | YNL271C | BNI1   | 1.0 | -2.7 | -2.5 | -2.2 | regulator of budding (by homology)                                          |
| CA3598 | orf19.12394 | SEC2        | -1.2 | -1.1 | -1.1 | -1.1 | YNL272C | SEC2   | 1.0 | -1.0 | -1.1 | -1.1 | GDP/GTP exchange factor (by homology)                                       |
| CA3599 | orf19.4929  | IPF19785    | -1.1 | -1.0 | -1.1 | -1.0 | YLR067C | PET309 | 1.0 | 1.1  | 1.7  | 2.2  | unknown function                                                            |
| CA3600 | orf19.4930  | SPC3        | 1.1  | 1.1  | 1.2  | 1.1  | YLR066W | SPC3   | 1.0 | 1.3  | 1.1  | -1.1 | signal peptidase subunit (by homology)                                      |
| CA3601 | orf19.4931  | IPF15618    | -1.3 | -1.3 | -1.7 | -1.4 | YNL247W |        | 1.0 | -1.2 | -1.1 | -1.1 | cysteinyI-tRNA synthetase (by homology)                                     |
| CA3602 |             | RPL14B.3    | 1.0  | -1.0 | -1.1 | 1.0  | YKL006W | RPL14A | 1.0 | 1.8  | 1.7  | 2.5  | ribosomal protein L14B, 3-prime end (by homology)                           |
| CA3603 | orf19.4932  | MEF1        | -1.3 | -1.8 | -2.0 | -2.0 | YLR069C | MEF1   | 1.0 | -2.3 | -5.7 | -2.6 | mitochondrial translation elongation factor G (by homology)                 |
| CA3607 | orf19.24    | RTA2        | 1.0  | 1.4  | 2.0  | 1.5  | YOR049C |        | 1.0 | -1.9 | -1.4 | -1.3 | Unknown function                                                            |
| CA3608 | orf19.25    | IPF3857     | -1.1 | -1.2 | -1.2 | -1.2 | YOL093W |        | 1.0 | 1.1  | 1.2  | 1.4  | unknown function                                                            |
| CA3609 | orf19.26    | IPF3856     | -1.1 | -1.0 | -1.1 | -1.0 | YPL096W | PNG1   | 1.0 | -1.2 | -1.1 | -1.0 | similar to Saccharomyces cerevisiae Png1P peptide:N-glycanase (by hor       |
| CA3611 | orf19.28    | IPF3853     | -1.1 | -1.1 | -1.1 | -1.0 | YGR096W |        | 1.0 | 1.0  | -1.0 | -1.1 | unknown function                                                            |
| CA3612 | orf19.29    | IPF3852     | 1.1  | 1.0  | -1.0 | 1.0  | YJR046W | TAH11  | 1.0 | -1.5 | -1.3 | 1.1  | unknown function                                                            |
| CA3613 | orf19.30    | SPF1        | 1.0  | 1.1  | 1.2  | 1.2  | YEL031W | SPF1   | 1.0 | -1.2 | -1.3 | -1.3 | P-type ATPase                                                               |
| CA3615 | orf19.34    | GIT1        | -1.0 | 1.0  | -1.0 | -1.0 | YCR098C | GIT1   | 1.0 | -1.4 | -1.7 | -1.4 | glycerophosphoinositol transporter (by homology)                            |
| CA3616 |             | ASN1        | -1.1 | 1.0  | 1.1  | 1.0  | YPR145W | ASN1   | 1.0 | 1.0  | 2.3  | 3.5  | asparagine synthetase (by homology)                                         |
| CA3618 | orf19.200   | THO1        | -1.1 | -1.0 | -1.1 | -1.1 | YER063W | THO1   | 1.0 | -1.4 | -1.1 | -1.2 | suppressor of the hpr1 ts phenotype (by homology)                           |
| CA3619 | orf19.202   | CDC47.5     | -1.3 | -1.2 | -1.2 | -1.2 | YBR202W | CDC47  | 1.0 | 1.1  | 1.1  | 1.2  | cell division control protein, , 5-prime end (by homology)                  |
| CA3620 | orf19.203   | IPF9063     | 1.1  | 1.1  | 1.2  | 1.0  | YDR169C | STB3   | 1.0 | 1.3  | 1.2  | 1.3  | similar to Saccharomyces cerevisiae Stb3p protein binding Sin3p (by hor     |
| CA3625 | orf19.12617 | CYR1.3F     | 1.0  | 1.1  | 1.1  | 1.0  | YJL005W | CYR1   | 1.0 | 1.1  | -1.1 | -1.1 | adenylate cyclase, 3-prime end                                              |
| CA3627 | orf19.12613 | IPF18318    | -1.2 | -1.0 | -1.1 | 1.0  | YLL007C |        | 1.0 | -1.1 | -1.2 | -1.1 | unknown function                                                            |
| CA3631 | orf19.12608 | TIM54       | -1.1 | -1.4 | -1.4 | -1.4 | YJL054W | TIM54  | 1.0 | -1.4 | -1.3 | -1.0 | Translocase for the insertion of proteins into the mitochondrial inner merr |
| CA3632 | orf19.5142  | DFR1        | 1.0  | 1.0  | 1.0  | -1.1 | YOR236W | DFR1   | 1.0 | -1.1 | -1.2 | 1.0  | dihydrofolate reductase                                                     |
| CA3637 | orf19.5136  | IPF9255     | -1.1 | 2.5  | 3.1  | 2.1  | YGR017W |        | 1.0 | -1.7 | -1.4 | -1.5 | unknown function                                                            |
| CA3639 | orf19.5133  | IPF9251     | 1.0  | 1.9  | 1.9  | 1.8  | YOR363C | PIP2   | 1.0 | -1.3 | -1.1 | -1.1 | unknown function                                                            |
| CA3640 | orf19.2031  | VPS24       | -1.0 | 1.0  | 1.0  | 1.1  | YKL041W | VPS24  | 1.0 | -1.1 | -1.2 | -1.2 | endosomal Vps protein complex subunit                                       |
| CA3648 | orf19.2039  | MSF1        | -1.1 | -1.1 | -1.1 | -1.1 | YPR047W | MSF1   | 1.0 | -1.4 | -1.4 | -1.6 | phenylalanine-tRNA ligase                                                   |
| CA3649 | orf19.2040  | IPF4132     | -1.0 | -1.0 | -1.0 | 1.0  | YPR048W | TAH18  | 1.0 | -1.0 | 1.5  | 1.7  | unknown function                                                            |
| CA3650 | orf19.2041  | IPF4134     | -1.3 | 1.0  | -1.3 | -1.1 | YKR008W | RSC4   | 1.0 | -1.1 | -1.2 | -1.1 | unknown function                                                            |
| CA3651 | orf19.2042  | MSS1        | -1.1 | -1.1 | -1.0 | 1.1  | YMR023C | MSS1   | 1.0 | 1.1  | 1.5  | 1.2  | Mitochondrial GTPase involved in expression of COX1 (by homology).          |
| CA3654 | orf19.2045  | IPF7452     | 1.2  | -1.0 | 1.2  | -1.0 | YOR311C | HSD1   | 1.0 | 1.2  | 1.2  | 1.6  | unknown function                                                            |
| CA3656 | orf19.2047  | IPF7456     | 1.0  | 1.1  | 1.2  | 1.1  | YOR289W |        | 1.0 | -1.1 | -1.1 | -1.1 | unknown function                                                            |
| CA3658 | orf19.2050  | TGL1        | -1.1 | 1.3  | 1.5  | 1.2  | YKL140W | TGL1   | 1.0 | -1.5 | -1.9 | -2.4 | Triacylglycerol lipase (by homology)                                        |
| CA3663 | orf19.6463  | IPF11432    | -1.0 | -1.1 | -1.1 | -1.1 | YJR072C |        | 1.0 | 1.2  | 1.4  | 1.4  | unknown function                                                            |
| CA3664 | orf19.6462  | IPF11433.3F | 1.1  | -1.0 | 1.0  | 1.0  | YKL207W |        | 1.0 | -1.7 | -1.0 | -1.0 | unknown function, 3-prime end                                               |
| CA3666 | orf19.6461  | IPF11435    | 1.0  | -1.1 | 1.1  | -1.0 | YDR231C | COX20  | 1.0 | 1.1  | -1.1 | -1.1 | unknown function                                                            |
| CA3667 | orf19.6460  | IPF16323    | -1.4 | -1.8 | -2.1 | -1.4 | YKL197C | PEX1   | 1.0 | -1.3 | -1.2 | -1.3 | similar to Saccharomyces cerevisiae Pex1p peroxisomal assembly protei       |
| CA3668 | orf19.6459  | DPP3        | 1.1  | 1.0  | 1.1  | 1.0  | YDR284C | DPP1   | 1.0 | 1.0  | -1.1 | -1.3 | Diacylglycerol Pyrophosphate Phosphatase by homology                        |
| CA3671 | orf19.6457  | IPF13933    | 1.0  | -1.0 | -1.0 | 1.0  | YBL086C |        | 1.0 | 1.0  | 1.0  | 1.0  | unknown function                                                            |
| CA3673 | orf19.6455  | IPF13667    | 1.2  | 1.2  | 1.4  | 1.2  | YHR122W |        | 1.0 | -1.7 | -1.5 | -1.3 | unknown function                                                            |
| CA3676 | orf19.6452  | RBP1        | 1.4  | 1.1  | 1.4  | 1.3  | YNL135C | FPR1   | 1.0 | 1.5  | 1.5  | 1.3  | rapamycin-binding protein                                                   |
| CA3678 | orf19.731   | IPF8392     | -1.1 | -1.2 | -1.4 | -1.1 | YLR080W |        | 1.0 | 1.0  | -1.0 | -1.0 | unknown function                                                            |
| CA3679 | orf19.730   | IPF20142    | -1.0 | 1.0  | -1.0 | -1.1 | YFL047W | RGD2   | 1.0 | 1.0  | 1.3  | 1.2  | unknown function                                                            |
| CA3681 | orf19.728   | IPF19787    | -1.1 | 1.0  | -1.0 | -1.1 | YER093C |        | 1.0 | -1.4 | -1.8 | -1.8 | unknown function                                                            |
| CA3683 | orf19.726   | PPZ1        | 1.1  | 1.2  | 1.3  | 1.1  | YML016C | PPZ1   | 1.0 | -2.0 | -1.9 | -2.0 | ser/thr phosphatase required for normal osmoregulation (by homology)        |
| CA3685 | orf19.723   | IPF19540    | 1.2  | -1.0 | 1.2  | 1.1  | YPL230W | USV1   | 1.0 | 1.6  | 1.5  | -1.1 | unknown function                                                            |
| CA3686 | orf19.13642 | IPF4890     | 1.4  | 1.4  | 2.2  | 1.5  | YOL119C |        | 1.0 | -1.8 | -1.2 | 1.1  | unknown function                                                            |
| CA3688 |             | YIP3.3      | 1.3  | 1.2  | 1.6  | 1.3  | YNL044W | YIP3   | 1.0 | 1.0  | -1.1 | 1.0  | protein of unknown function, 3-prime end (by homology)                      |
| CA3689 | orf19.6265  | RPS22A      | 1.9  | 1.2  | 1.2  | 1.4  | YJL190C | RPS22A | 1.0 | 1.1  | 1.2  | 1.4  | ribosomal protein S15a.e.c10 (by homology)                                  |
| CA3690 |             | RPS14B      | 1.1  | 1.0  | -1.1 | 1.1  | YJL191W | RPS14B | 1.0 | 1.2  | 1.4  | 1.7  | ribosomal protein (by homology)                                             |
| CA3693 | orf19.6268  | IPF4874     | -1.1 | -1.1 | -1.1 | -1.0 | YBR007C |        | 1.0 | -1.8 | -1.2 | 1.1  | unknown function                                                            |
| CA3696 | orf19.13650 | IPF4868     | -1.1 | -1.1 | -1.0 | 1.1  | YPR045C |        | 1.0 | -1.5 | -1.4 | -1.5 | unknown function                                                            |
| CA3697 | orf19.13651 | IPF4866     | 1.0  | 1.1  | 1.1  | -1.0 | YJR099W | YUH1   | 1.0 | -2.2 | -1.5 | -1.4 | similar to Saccharomyces cerevisiae Yuh1p ubiquitin-specific protease       |
| CA3699 | orf19.6275  | IPF4860     | 1.1  | 1.0  | -1.0 | -1.0 | YBR028C |        | 1.0 | -1.2 | -1.4 | -1.4 | similarity to ribosomal protein kinases (by homology)                       |
| CA3705 | orf19.4945  | MSH6        | -1.1 | 1.0  | 1.0  | -1.0 | YDR097C | MSH6   | 1.0 | -1.3 | -1.1 | 1.1  | DNA mismatch repair protein by homology                                     |
| CA3707 | orf19.4941  | TYE7        | -1.1 | 16.4 | 15.0 | 11.4 | YOR344C | TYE7   | 1.0 | 1.4  | 2.2  | 3.2  | Basic helix-loop-helix transcription factor by homology                     |
| CA3709 | orf19.4939  | IPF7880     | -1.4 | 1.1  | -1.1 | 1.1  | YNL297C | MON2   | 1.0 | -1.1 | -1.1 | -1.0 | unknown function                                                            |
| CA3711 | orf19.4937  | CHS3.3F     | 1.0  | 1.1  | 1.2  | 1.0  | YBR023C | CHS3   | 1.0 | -1.4 | -1.7 | -1.5 | chitin-UDP acetyl-glucosaminyl transferase 3, 5-prime end                   |
| CA3714 | orf19.11639 | IPF16223    | -1.3 | -1.3 | -1.6 | -1.2 | YGR198W |        | 1.0 | -1.8 | -1.3 | -1.5 | unknown function                                                            |
| CA3715 | orf19.4164  | IPF6205     | 1.1  | -1.0 | -1.1 | -1.0 | YJR014W |        | 1.0 | -1.2 | -1.1 | -1.1 | unknown function                                                            |

|        |             |                   |      |      |      |      |         |               |     |      |      |      |                                                                                  |
|--------|-------------|-------------------|------|------|------|------|---------|---------------|-----|------|------|------|----------------------------------------------------------------------------------|
| CA3717 | orf19.11643 | <i>IPF6192</i>    | 1.1  | -1.1 | -1.0 | -1.0 | YPL108W |               | 1.0 | 1.1  | 1.0  | 1.1  | unknown function                                                                 |
| CA3718 | orf19.11644 | <i>POP7</i>       | -1.1 | -1.1 | 1.0  | -1.1 | YBR167C | <i>POP7</i>   | 1.0 | 1.3  | 1.4  | 1.9  | Nuclear RNase P subunit (by homology)                                            |
| CA3723 | orf19.4173  | <i>DPH2</i>       | 1.0  | -1.0 | -1.0 | -1.0 | YKL191W | <i>DPH2</i>   | 1.0 | -1.2 | -1.2 | -1.1 | Diphtheria toxin resistance protein (by homology)                                |
| CA3724 | orf19.4174  | <i>IPF6181</i>    | 1.0  | 1.1  | 1.6  | 1.1  | YAL022C | <i>FUN26</i>  | 1.0 | -1.6 | -1.4 | -1.3 | similar to <i>Saccharomyces cerevisiae</i> Fun 26p nucleoside transporter (by    |
| CA3725 | orf19.4175  | <i>TOK1.3</i>     | -1.1 | -1.0 | 1.1  | -1.0 | YJL093C | <i>TOK1</i>   | 1.0 | -1.5 | -1.7 | -1.8 | Outward-rectifier potassium channel, 3-prime end (by homology)                   |
| CA3726 | orf19.4176  | <i>IPF6175</i>    | -1.1 | -1.1 | 1.1  | 1.0  | YMR188C |               | 1.0 | -1.1 | -1.4 | -1.7 | unknown function                                                                 |
| CA3727 | orf19.4177  | <i>HIS5.3F</i>    | -1.1 | -1.1 | -1.0 | -1.0 | YIL116W | <i>HIS5</i>   | 1.0 | 1.1  | 1.2  | 2.0  | Histidinol-phosphate aminotransferase, 3-prime end (by homology)                 |
| CA3730 | orf19.4180  | <i>IPF11900</i>   | 1.1  | 1.1  | 1.1  | 1.1  | YLR292C | <i>SEC72</i>  | 1.0 | -1.5 | -1.8 | -1.7 | unknown function                                                                 |
| CA3731 | orf19.4181  | <i>SPC2</i>       | 1.1  | 1.1  | 1.1  | -1.0 | YML055W | <i>SPC2</i>   | 1.0 | -1.3 | -1.2 | -1.4 | signal peptidase 18 kDa subunit (by homology)                                    |
| CA3736 | orf19.2183  | <i>IPF5533</i>    | 1.3  | 1.5  | 1.2  | 1.1  | YER036C | <i>KRE30</i>  | 1.0 | 1.1  | 1.4  | 2.8  | ABC transporter (by homology)                                                    |
| CA3737 | orf19.2182  | <i>BLM3</i>       | -1.2 | 1.4  | 1.1  | 1.2  | YFL007W | <i>BLM3</i>   | 1.0 | -1.5 | -1.4 | -1.2 | bleomycin resistance (by homology)                                               |
| CA3738 | orf19.2180  | <i>IPF5526</i>    | 1.1  | -1.0 | -1.0 | -1.0 | YGR058W |               | 1.0 | 1.2  | 1.3  | 1.3  | unknown function                                                                 |
| CA3739 |             | <i>RPS10.3</i>    | 1.4  | -1.1 | -1.1 | 1.0  | YOR293W | <i>RPS10A</i> | 1.0 | 1.6  | 2.2  | 2.6  | ribosomal protein, 3-prime end (by homology)                                     |
| CA3740 | orf19.2179  | <i>SIT1</i>       | 1.1  | 1.2  | 1.6  | 1.1  | YHL040C | <i>ARN1</i>   | 1.0 | -1.2 | -1.3 | -1.2 | Ferrioxamine B permease by homology                                              |
| CA3741 | orf19.2178  | <i>MRS4</i>       | 1.1  | 1.2  | 1.3  | 1.3  | YKR052C | <i>MRS4</i>   | 1.0 | -1.4 | -1.3 | -1.3 | RNA splicing protein and member of the mitochondrial carrier family (MC          |
| CA3743 | orf19.2175  | <i>IPF19998</i>   | 1.0  | 1.1  | 1.2  | 1.1  | YNR074C |               | 1.0 | 1.1  | 1.0  | -1.1 | unknown function                                                                 |
| CA3744 | orf19.2174  | <i>RAD57</i>      | -1.0 | -1.0 | -1.0 | -1.0 | YDR004W | <i>RAD57</i>  | 1.0 | 1.1  | 1.2  | 1.0  | DNA-repair like protein                                                          |
| CA3745 | orf19.2173  | <i>MAF1</i>       | -1.0 | -1.1 | 1.1  | 1.0  | YDR005C | <i>MAF1</i>   | 1.0 | 1.1  | 1.2  | 1.2  | nuclear protein by homology                                                      |
| CA3746 | orf19.2172  | <i>ARA1</i>       | 1.1  | 1.2  | 1.2  | 1.1  | YBR149W | <i>ARA1</i>   | 1.0 | -1.2 | -1.4 | -1.7 | D-arabinose dehydrogenase (by homology)                                          |
| CA3747 | orf19.2170  | <i>IPF10153</i>   | 1.5  | 1.3  | 1.2  | 1.1  | YOL084W | <i>PHM7</i>   | 1.0 | -1.1 | 1.1  | -1.1 | membrane transporter by homology                                                 |
| CA3752 | orf19.3426  | <i>TIF5.3</i>     | 1.2  | -1.2 | -1.2 | -1.0 | YEL034W | <i>HYP2</i>   | 1.0 | 1.5  | 1.8  | 1.7  | translation initiation factor eIF-5A, 3-prime end                                |
| CA3754 | orf19.3423  | <i>TIF3</i>       | -1.2 | -1.1 | -1.5 | -1.3 | YPR163C | <i>TIF3</i>   | 1.0 | 1.6  | 2.9  | 3.5  | translation initiation factor eIF4B (by homology)                                |
| CA3755 |             | <i>IPF17743</i>   | -1.0 | -1.0 | -1.2 | -1.0 | YBL093C | <i>ROX3</i>   | 1.0 | -1.4 | -1.3 | -1.3 | Unknown function                                                                 |
| CA3756 | orf19.3422  | <i>IPF8884</i>    | -1.1 | -1.0 | -1.3 | -1.1 | YLR454W |               | 1.0 | 1.1  | -1.8 | -2.7 | unknown function                                                                 |
| CA3757 | orf19.3419  | <i>MAE1</i>       | -1.2 | 1.0  | 1.2  | -1.2 | YKL029C | <i>MAE1</i>   | 1.0 | 1.2  | 1.8  | 4.4  | mitochondrial malic enzyme (by homology)                                         |
| CA3760 | orf19.2909  | <i>ERG26</i>      | 1.0  | -1.0 | -1.1 | 1.0  | YGL001C | <i>ERG26</i>  | 1.0 | 1.2  | 1.9  | 2.1  | C-3 sterol dehydrogenase (C-4 decarboxylase) (by homology)                       |
| CA3767 | orf19.2901  | <i>NUP60</i>      | -1.1 | 1.1  | -1.0 | 1.0  | YAR002W | <i>NUP60</i>  | 1.0 | -1.5 | -1.2 | 1.1  | Putative nuclear pore protein (by homology)                                      |
| CA3769 | orf19.2898  | <i>IPF13465</i>   | 1.1  | -1.1 | -1.0 | 1.0  | YNL275W |               | 1.0 | 1.1  | 1.0  | 1.3  | Putative anion transport protein (by homology)                                   |
| CA3772 | orf19.2895  | <i>VMA8</i>       | -1.0 | -1.1 | -1.0 | 1.0  | YEL051W | <i>VMA8</i>   | 1.0 | -1.2 | 1.6  | 1.3  | CANAL VACUOLAR ATP SYNTHASE SUBUNIT D                                            |
| CA3773 | orf19.2893  | <i>IPF11153</i>   | -1.0 | -1.1 | 1.0  | 1.1  | YDR416W | <i>SYF1</i>   | 1.0 | -1.2 | -1.2 | 1.1  | unknown function                                                                 |
| CA3774 | orf19.2892  | <i>IPF10437</i>   | 1.0  | -1.0 | 1.0  | 1.0  | YHR103W | <i>SBE22</i>  | 1.0 | -1.5 | -1.4 | -1.2 | budding protein-like (by homology)                                               |
| CA3775 | orf19.2891  | <i>AFG1</i>       | -1.0 | -1.5 | -1.4 | -1.2 | YEL052W | <i>AFG1</i>   | 1.0 | 1.2  | 1.2  | -1.1 | ATPase family gene (by homology)                                                 |
| CA3777 | orf19.2889  | <i>IPF10432</i>   | 1.0  | 1.1  | 1.0  | 1.1  | YEL044W | <i>IES6</i>   | 1.0 | -2.4 | -2.1 | -1.7 | unknown function                                                                 |
| CA3781 | orf19.5839  | <i>IPF11224</i>   | -1.0 | 1.0  | -1.0 | 1.0  | YNL231C | <i>PDR16</i>  | 1.0 | -1.0 | -1.1 | -1.1 | similar to <i>Saccharomyces cerevisiae</i> Pdr16p protein involved in lipid bios |
| CA3782 | orf19.5838  | <i>SER2</i>       | 1.0  | -1.1 | -1.1 | -1.0 | YGR208W | <i>SER2</i>   | 1.0 | 1.3  | 1.1  | 1.7  | phosphoserine phosphatase by homology to <i>S. cerevisiae</i>                    |
| CA3783 | orf19.5837  | <i>IPF11226</i>   | 1.0  | 1.0  | 1.0  | 1.1  | YMR289W |               | 1.0 | -1.3 | 1.2  | 1.1  | unknown function                                                                 |
| CA3784 | orf19.5835  | <i>IPF11229</i>   | 1.0  | -1.1 | -1.1 | 1.1  | YCL031C | <i>RRP7</i>   | 1.0 | -1.3 | -1.0 | 1.2  | similar to <i>Saccharomyces cerevisiae</i> Rrp7p involved in pre-rRNA proces     |
| CA3785 | orf19.5834  | <i>IPF19788</i>   | -1.0 | 1.0  | -1.1 | -1.0 | YDR395W | <i>SXM1</i>   | 1.0 | -1.3 | 1.0  | -1.1 | similar to <i>Saccharomyces cerevisiae</i> Sxm1p putative beta-karyopherin (t    |
| CA3786 | orf19.5833  | <i>UFD1</i>       | -1.1 | 1.2  | 1.1  | 1.1  | YGR048W | <i>UFD1</i>   | 1.0 | -1.1 | -1.0 | 1.1  | Ubiquitin fusion degradation protein (by homology)                               |
| CA3787 | orf19.5832  | <i>HPT1</i>       | -1.2 | -1.1 | 1.1  | -1.0 | YDR399W | <i>HPT1</i>   | 1.0 | -1.1 | -1.3 | 1.4  | hypoxanthine guanine phosphoribosyl transferase (by homology)                    |
| CA3789 | orf19.13252 | <i>IPF11217</i>   | -1.4 | -1.3 | -1.6 | -1.2 | YKL073W | <i>LHS1</i>   | 1.0 | -1.4 | -1.5 | -1.5 | similar to <i>Saccharomyces cerevisiae</i> Lhs1p chaperone of the ER lumen (     |
| CA3790 | orf19.13250 | <i>IPF11215</i>   | -1.1 | -1.0 | -1.1 | -1.1 | YKL074C | <i>MUD2</i>   | 1.0 | -1.2 | -1.1 | 1.1  | unknown function                                                                 |
| CA3791 | orf19.5827  | <i>IPF11212</i>   | 1.0  | 1.0  | 1.0  | 1.0  | YMR055C | <i>BUB2</i>   | 1.0 | -1.2 | 1.3  | 1.4  | similar to <i>Saccharomyces cerevisiae</i> Bub2 cell cycle arrest protein (by hc |
| CA3793 |             | <i>IPF5701</i>    | 1.1  | 1.0  | 1.1  | 1.1  | YER074W | <i>RPS24A</i> | 1.0 | 2.2  | 2.2  | 2.5  | unknown function                                                                 |
| CA3794 | orf19.5825  | <i>NCB2</i>       | -1.0 | 1.2  | 1.1  | 1.0  | YDR397C | <i>NCB2</i>   | 1.0 | -1.3 | -1.4 | -1.2 | Transcriptional repressor by homology                                            |
| CA3796 | orf19.5823  | <i>SGT2</i>       | -1.2 | -1.1 | -1.3 | -1.2 | YOR007C | <i>SGT2</i>   | 1.0 | -1.0 | 1.2  | 1.5  | small glutamine-rich tetratricopeptide repeat containing protein by homol        |
| CA3797 | orf19.5821  | <i>IPF5623</i>    | -1.2 | -1.1 | -1.0 | -1.1 | YML002W |               | 1.0 | -1.9 | -1.5 | -1.7 | unknown function                                                                 |
| CA3800 |             | <i>RPL7A.3</i>    | 1.0  | -1.1 | -1.2 | -1.1 | YPL198W | <i>RPL7B</i>  | 1.0 | 1.4  | 2.5  | 2.9  | 60S Ribosomal Protein L7-A, 3-prime end                                          |
| CA3802 |             | <i>AUT7.EXON2</i> | 1.1  | 1.0  | 1.2  | -1.0 | YBL078C | <i>AUT7</i>   | 1.0 | 1.1  | -1.2 | -1.4 | microtubule-associated protein essential for autophagy, exon 2 (by homo          |
| CA3805 | orf19.2484  | <i>IPF12403</i>   | 1.0  | 1.1  | 1.2  | 1.1  | YDR415C |               | 1.0 | -1.4 | -1.2 | -1.2 | unknown function                                                                 |
| CA3806 | orf19.2485  | <i>IPF9224</i>    | -1.1 | 1.0  | -1.0 | 1.0  | YBL079W | <i>NUP170</i> | 1.0 | -1.4 | -1.3 | -1.4 | similar to <i>Saccharomyces cerevisiae</i> Nup170p nuclear pore protein (by h    |
| CA3807 | orf19.2487  | <i>IPF9225</i>    | -1.1 | 1.0  | 1.0  | -1.1 | YDR020C |               | 1.0 | -1.4 | -1.3 | -1.1 | unknown function                                                                 |
| CA3808 | orf19.2488  | <i>FAL1</i>       | -1.0 | -1.1 | -1.3 | -1.3 | YDR021W | <i>FAL1</i>   | 1.0 | -1.4 | -1.2 | -1.3 | ATP-dependent RNA helicase                                                       |
| CA3809 | orf19.2489  | <i>KAP123</i>     | 1.3  | 1.3  | 1.2  | 1.1  | YER110C | <i>KAP123</i> | 1.0 | -1.0 | 1.6  | 2.8  | karyopherin-beta protein (by homology)                                           |
| CA3810 | orf19.2492  | <i>IPF9230</i>    | -1.0 | 1.0  | -1.1 | -1.0 | YKL178C | <i>STE3</i>   | 1.0 | -1.8 | -1.4 | -1.5 | similar to <i>Saccharomyces cerevisiae</i> Ste3p pheromone a-factor receptor     |
| CA3811 | orf19.2494  | <i>PET112</i>     | -1.0 | -1.0 | -1.1 | 1.0  | YBL080C | <i>PET112</i> | 1.0 | -1.2 | -1.2 | -1.0 | glutamyl-tRNA (GLN) amidotransferase subunit B (by homology)                     |
| CA3814 | orf19.2498  | <i>IPF4023</i>    | 1.0  | 1.1  | 1.2  | 1.1  | YDR143C | <i>SAN1</i>   | 1.0 | 1.2  | 1.3  | 1.7  | unknown function                                                                 |
| CA3815 | orf19.2499  | <i>CYP7</i>       | 1.0  | -1.0 | 1.0  | -1.0 | YJR032W | <i>CPR7</i>   | 1.0 | -1.2 | -1.3 | -1.3 | peptidyl-prolyl cis-trans isomerase cyp7 (ppiase)                                |
| CA3818 | orf19.5773  | <i>IPF6695</i>    | -1.5 | -2.2 | -2.5 | -1.9 | YOL057W |               | 1.0 | -1.2 | -1.1 | -1.1 | unknown function                                                                 |
| CA3819 | orf19.5772  | <i>IPF6993</i>    | -1.0 | -1.1 | -1.1 | -1.1 | YBR231C | <i>AOR1</i>   | 1.0 | 1.0  | 1.1  | 1.2  | unknown function                                                                 |
| CA3820 | orf19.5771  | <i>PBP2</i>       | -1.1 | -1.1 | -1.1 | -1.1 | YBR233W | <i>PBP2</i>   | 1.0 | -1.3 | -1.3 | -1.3 | PAB1 binding protein (by homology)                                               |



|        |             |          |      |      |      |      |         |        |     |      |      |      |                                                                           |
|--------|-------------|----------|------|------|------|------|---------|--------|-----|------|------|------|---------------------------------------------------------------------------|
| CA3821 | orf19.5770  | IPF6990  | -1.0 | -1.0 | 1.1  | -1.0 | YGL114W |        | 1.0 | -1.1 | 1.1  | 1.2  | unknown function                                                          |
| CA3822 | orf19.5767  | CUS2     | -1.0 | -1.0 | -1.1 | -1.1 | YNL286W | CUS2   | 1.0 | -1.1 | -1.1 | -1.0 | cold sensitive U2 snRNA Suppressor(by homology)                           |
| CA3823 | orf19.5765  | IPF10651 | -1.1 | -1.0 | -1.1 | -1.1 | YJL061W | NUP82  | 1.0 | -1.2 | -1.2 | 1.1  | unknown function                                                          |
| CA3824 | orf19.5764  | SK18     | -1.1 | -1.1 | -1.0 | -1.0 | YGL213C | SK18   | 1.0 | -1.1 | 1.1  | 1.4  | antiviral protein-like (by homology)                                      |
| CA3828 | orf19.5759  | SNQ2     | -1.0 | 1.8  | 2.0  | 1.4  | YDR011W | SNQ2   | 1.0 | -1.1 | -1.3 | 1.0  | multidrug resistance protein (by homology)                                |
| CA3830 | orf19.6589  | SSF1     | 1.1  | 1.0  | -1.0 | 1.0  | YDR312W | SSF2   | 1.0 | 1.2  | 1.2  | 1.6  | mating protein (by homology)                                              |
| CA3831 | orf19.6590  | VMA22    | 1.1  | 1.0  | -1.0 | -1.0 | YHR060W | VMA22  | 1.0 | -1.2 | 1.1  | 1.4  | vacuolar ATPase assembly protein (by homology)                            |
| CA3832 | orf19.6591  | IPF8193  | -1.1 | -1.1 | -1.1 | -1.1 | YLR151C | PCD1   | 1.0 | -1.9 | -1.3 | 1.0  | unknown function                                                          |
| CA3834 | orf19.6594  | PLB3     | -1.1 | 1.3  | 1.3  | 1.2  | YMR008C | PLB1   | 1.0 | -1.8 | -1.7 | -1.3 | phospholipase B (by homology)                                             |
| CA3836 | orf19.6596  | IPF8179  | 1.2  | 1.3  | 1.4  | 1.3  | YJL068C |        | 1.0 | -1.2 | -1.1 | -1.5 | putative esterase (by homology)                                           |
| CA3838 | orf19.6598  | LAS17    | 1.1  | 1.1  | 1.1  | -1.1 | YOR181W | LAS17  | 1.0 | -1.0 | 1.1  | 1.1  | actin assembly factor (by homology)                                       |
| CA3840 | orf19.6600  | IPF12745 | 1.0  | 1.2  | 1.2  | 1.1  | YLR193C |        | 1.0 | 1.0  | 1.0  | 1.1  | unknown function                                                          |
| CA3842 |             | YKE2.3   | 1.1  | -1.1 | 1.1  | 1.1  | YLR200W | YKE2   | 1.0 | -1.7 | -1.5 | -1.3 | Gim complex component, 3-prime end (by homology)                          |
| CA3843 | orf19.6602  | IPF7947  | -1.1 | -1.0 | 1.1  | -1.0 | YLR201C |        | 1.0 | -2.8 | -2.6 | -2.9 | unknown function                                                          |
| CA3845 | orf19.6605  | IPF7944  | -1.1 | 1.0  | 1.1  | 1.1  | YOR292C |        | 1.0 | -1.3 | -1.1 | -1.0 | unknown function                                                          |
| CA3849 | orf19.6610  | IPF7938  | -1.0 | 1.1  | 1.1  | -1.0 | YLR045C | STU2   | 1.0 | -2.3 | -2.2 | -1.9 | similar to Saccharomyces cerevisiae Stu2p suppressor of cold-sensitive 1  |
| CA3850 | orf19.6612  | IPF7932  | 1.1  | -1.2 | -1.1 | -1.0 | YGR207C |        | 1.0 | -1.0 | 1.1  | -1.1 | similar to Saccharomyces cerevisiae Etf-beta electron-transferring flavop |
| CA3852 | orf19.6109  | TUP1     | 1.0  | 1.0  | 1.1  | -1.0 | YCR084C | TUP1   | 1.0 | -1.0 | 1.3  | -1.2 | general transcription repressor                                           |
| CA3853 | orf19.6105  | MVD1.3   | 1.1  | 1.1  | 1.2  | 1.1  | YNR043W | MVD1   | 1.0 | 1.2  | 1.8  | 2.0  | mevalonate pyrophosphate decarboxylase, 3-prime end                       |
| CA3854 | orf19.6102  | IPF4649  | 1.0  | 1.1  | 1.2  | -1.0 | YIL036W | CST6   | 1.0 | -1.1 | 1.1  | 1.2  | unknown Function                                                          |
| CA3855 | orf19.6103  | IPF4645  | 1.0  | 1.0  | -1.0 | -1.0 | YER046W | SPO73  | 1.0 | 1.0  | 1.0  | 1.3  | unknown Function                                                          |
| CA3856 | orf19.6100  | IPF4641  | 1.1  | 1.1  | 1.1  | 1.0  | YDL142C | CRD1   | 1.0 | -1.3 | -1.1 | -1.1 | similar to Saccharomyces cerevisiae Crd1p cardiolipin synthase (by hom    |
| CA3857 | orf19.6099  | CCT8     | 1.0  | -1.1 | -1.1 | -1.1 | YJL008C | CCT8   | 1.0 | -1.2 | 1.2  | 1.2  | component of chaperonin-containing T-complex                              |
| CA3858 | orf19.6096  | TRP1     | -1.1 | 1.0  | 1.1  | -1.0 | YDR007W | TRP1   | 1.0 | 1.1  | 1.0  | -1.1 | phosphoribosylanthranilate isomerase                                      |
| CA3859 | orf19.6094  | IPF4632  | -1.0 | 1.1  | 1.1  | 1.0  | YJL029C | VPS53  | 1.0 | 1.2  | 1.1  | 1.3  | similar to Saccharomyces cerevisiae Vps53p subunit of VP52-54 comple      |
| CA3860 | orf19.6092  | KEL1     | -1.0 | -1.2 | -1.4 | -1.2 | YGR238C | KEL2   | 1.0 | -1.3 | -1.3 | -1.5 | involved in cell fusion and morphology (by homology)                      |
| CA3861 | orf19.6091  | RIM8     | 1.0  | -1.0 | -1.0 | 1.0  | YGL046W |        | 1.0 | 1.0  | 1.1  | -1.1 | regulator of PH response                                                  |
| CA3862 | orf19.6090  | NSR1     | 1.2  | 1.1  | 1.1  | 1.1  | YGR159C | NSR1   | 1.0 | 1.2  | 1.5  | 2.9  | nuclear localization sequence binding protein (by homology)               |
| CA3863 | orf19.6086  | LEU41    | 1.1  | -1.0 | -1.0 | -1.0 | YNL104C | LEU4   | 1.0 | -1.4 | -1.2 | 1.1  | 2-isopropylmalalate synthase (by homology)                                |
| CA3864 | orf19.6085  | RPL16A   | -1.0 | -1.2 | -1.4 | -1.2 | YNL069C | RPL16B | 1.0 | 1.6  | 2.9  | 3.9  | ribosomal protein (by homology)                                           |
| CA3866 | orf19.6082  | IPF4606  | -1.3 | -1.3 | -1.2 | -1.1 | YML048W | GSF2   | 1.0 | 1.2  | 1.5  | 1.3  | unknown Function                                                          |
| CA3867 | orf19.13500 | PHR2     | 1.1  | 1.1  | 1.4  | 1.2  | YMR307W | GAS1   | 1.0 | 1.1  | 2.3  | 2.4  | pH-regulated protein 2                                                    |
| CA3868 | orf19.401   | CCT1     | -1.2 | -1.0 | -1.1 | -1.2 | YDR212W | TCP1   | 1.0 | 1.2  | 1.4  | 1.5  | component of chaperonin-containing T-complex (by homology)                |
| CA3870 | orf19.399   | YPK1     | -1.1 | 1.3  | 1.5  | 1.3  | YMR104C | YPK2   | 1.0 | 1.0  | 1.3  | -1.1 | ser/thr-specific protein kinase (by homology)                             |
| CA3872 | orf19.397   | MRPL28   | 1.0  | -1.0 | -1.2 | -1.0 | YDR462W | MRPL28 | 1.0 | -1.4 | -1.3 | -1.6 | mitochondrial ribosomal protein of the large subunit (by homology)        |
| CA3873 | orf19.396   | IPF8825  | 1.0  | 1.0  | -1.0 | 1.1  | YJR082C |        | 1.0 | -1.3 | -1.3 | -1.4 | unknown function                                                          |
| CA3874 | orf19.395   | ENO1     | 1.6  | 1.6  | 1.2  | 1.5  | YGR254W | ENO1   | 1.0 | 1.8  | 2.7  | 4.2  | Enolase I (2-phosphoglycerate dehydratase)                                |
| CA3875 | orf19.8024  | IPF14430 | -1.1 | -1.1 | -1.0 | 1.1  | YLR231C |        | 1.0 | -1.0 | 1.1  | 1.1  | putative kynureninase (by homology)                                       |
| CA3876 | orf19.8023  | APS3     | 1.1  | 1.2  | 1.1  | 1.1  | YJL024C | APS3   | 1.0 | -1.6 | -1.4 | -1.4 | AP-3 complex subunit, sigma3 subunit (by homology)                        |
| CA3877 | orf19.392   | CBP4     | -1.0 | -1.1 | -1.1 | -1.0 | YGR174C | CBP4   | 1.0 | -1.0 | -1.3 | -1.7 | Ubiquinol-cytochrome-c reductase assembly factor (by homology)            |
| CA3878 | orf19.391   | IPF7289  | -1.2 | 1.1  | 1.2  | 1.2  | YDR213W | UPC2   | 1.0 | -1.2 | -1.4 | -1.3 | similar to Saccharomyces cerevisiae Upc2p RNA polymerase II transcrip     |
| CA3879 | orf19.390   | CDC42    | 1.1  | 1.3  | 1.5  | 1.3  | YLR229C | CDC42  | 1.0 | 1.3  | 1.5  | 1.9  | Cell Division Control                                                     |
| CA3880 | orf19.388   | CAF16    | -1.0 | 1.2  | 1.2  | 1.2  | YFL028C | CAF16  | 1.0 | -1.3 | 1.2  | 1.3  | ABC ATPase (by homology)                                                  |
| CA3881 | orf19.387   | GCR3     | -1.3 | -1.0 | -1.2 | -1.0 | YMR125W | STO1   | 1.0 | -1.4 | 1.0  | 1.1  | Large subunit of the nuclear cap-binding protein complex CBC (by homol    |
| CA3882 | orf19.386   | IPF7279  | -1.0 | -1.1 | -1.2 | -1.1 | YPL273W | SAM4   | 1.0 | 1.9  | 3.5  | 4.3  | putative cobalamin-dependent homocysteine S-methyltransferase (by ho      |
| CA3883 | orf19.8015  | GCV2     | -1.2 | -3.7 | -5.2 | -3.7 | YMR189W | GCV2   | 1.0 | 1.0  | -1.2 | -1.2 | Glycine decarboxylase P subunit                                           |
| CA3884 | orf19.8014  | IPF6367  | 1.0  | 1.0  | 1.0  | 1.0  | YPL247C |        | 1.0 | 1.2  | -1.1 | -1.4 | unknown function                                                          |
| CA3885 | orf19.5095  | IPF19790 | -1.0 | 1.0  | -1.2 | -1.2 | YDL019C | OSH2   | 1.0 | -1.3 | -1.2 | -1.4 | unknown function                                                          |
| CA3887 | orf19.5093  | IPF12964 | -1.0 | -1.0 | -1.1 | -1.0 | YLR321C | SFH1   | 1.0 | 1.0  | -1.0 | 1.2  | similar to Saccharomyces cerevisiae Sfh1p subunit of the RSC chromatin    |
| CA3889 | orf19.5090  | TAD3     | 1.1  | 1.0  | -1.0 | 1.1  | YLR316C | TAD3   | 1.0 | -1.1 | -1.1 | -1.3 | tRNA-specific adenosine-34 deaminase subunit (by homology)                |
| CA3890 | orf19.5089  | TERT2    | -1.1 | -1.0 | -1.1 | 1.0  | YLR318W | EST2   | 1.0 | -1.6 | -1.3 | -1.1 | telomerase reverse transcriptase 2                                        |
| CA3891 | orf19.5087  | BUD6     | -1.1 | -1.1 | -1.1 | -1.0 | YLR319C | BUD6   | 1.0 | 1.2  | 1.2  | 1.4  | bud site selection protein (by homology)                                  |
| CA3892 | orf19.5085  | PSE1     | -1.2 | -1.0 | -1.2 | -1.2 | YMR308C | PSE1   | 1.0 | -1.1 | 1.5  | 1.8  | karyopherin-beta protein (by homology)                                    |
| CA3893 | orf19.5083  | FUN11    | -1.3 | -1.1 | -1.2 | -1.1 | YAL036C | FUN11  | 1.0 | -1.1 | 1.0  | 1.5  | putative GTP-binding protein (by homology)                                |
| CA3894 | orf19.5081  | YIF2     | -1.0 | 1.1  | -1.0 | -1.1 | YAL035W | FUN12  | 1.0 | -1.6 | -1.4 | 1.1  | general translation factor eIF2 homolog (by homology)                     |
| CA3897 | orf19.5076  | PFY1     | 1.2  | -1.0 | 1.0  | 1.0  | YOR122C | PFY1   | 1.0 | 1.1  | 1.2  | 1.0  | BINDS TO ACTIN                                                            |
| CA3898 | orf19.5074  | UBA2     | -1.3 | -1.0 | -1.2 | -1.2 | YDR390C | UBA2   | 1.0 | -1.2 | 1.1  | 1.0  | ubiquitin-activating -like enzyme by homology                             |
| CA3899 | orf19.5073  | DPM1     | 1.1  | 1.3  | 1.5  | 1.6  | YPR183W | DPM1   | 1.0 | 1.2  | 1.8  | 1.8  | dolichol-phosphate (beta-D) mannosyltransferase 1 by homology             |
| CA3900 | orf19.5071  | IPF10092 | -1.0 | 1.1  | -1.0 | -1.0 | YDL167C | NRP1   | 1.0 | 1.2  | 1.4  | 2.1  | unknown function                                                          |
| CA3902 | orf19.4401  | YVH1     | 1.1  | 1.0  | 1.1  | 1.1  | YIR026C | YVH1   | 1.0 | 1.1  | 1.1  | 1.4  | protein tyrosine phosphatase (by homology)                                |
| CA3904 | orf19.11877 | IPF14888 | -1.1 | -1.1 | -1.1 | -1.1 | YNL119W |        | 1.0 | 1.0  | 1.4  | 1.7  | unknown function                                                          |

|        |             |             |      |      |      |      |         |     |      |      |      |                                                                          |
|--------|-------------|-------------|------|------|------|------|---------|-----|------|------|------|--------------------------------------------------------------------------|
| CA3905 | orf19.11876 | IPF19792    | 1.1  | 1.0  | 1.0  | -1.0 | YPR147C | 1.0 | -1.1 | -1.4 | -1.3 | unknown function                                                         |
| CA3906 | orf19.11874 | IPF20149    | -1.0 | -1.2 | -1.2 | -1.1 | YKR016W | 1.0 | -1.2 | -1.1 | -1.7 | unknown function                                                         |
| CA3907 | orf19.11873 | IPF3304     | -1.1 | 1.1  | 1.1  | 1.1  | YMR092C | 1.0 | 1.0  | 1.5  | 1.1  | similar to Saccharomyces cerevisiae Aip1p actin cytoskeleton componen    |
| CA3909 | orf19.4393  | CIT1.EXON2  | -1.0 | -1.0 | -1.2 | -1.3 | YNR001C | 1.0 | -2.0 | -2.4 | -5.8 | Citrate synthase, exon 2                                                 |
| CA3910 | orf19.4392  | IPF3293     | -1.1 | 1.0  | -1.0 | 1.1  | YBR163W | 1.0 | -1.1 | -1.1 | -1.1 | unknown function                                                         |
| CA3913 | orf19.4388  | IPF3283     | 1.0  | -1.0 | -1.1 | -1.0 | YPL011C | 1.0 | 1.0  | 1.1  | 1.3  | unknown function                                                         |
| CA3916 | orf19.4383  | IPF3274     | 1.0  | 1.0  | -1.0 | 1.0  | YOR258W | 1.0 | -1.4 | -1.1 | -1.4 | Unknown function                                                         |
| CA3917 | orf19.4382  | IPF3273     | 1.2  | 1.2  | 1.2  | 1.2  | YPL010W | 1.0 | 1.1  | 1.1  | -1.1 | similar to Saccharomyces cerevisiae Ret3p coatomer complex zeta chair    |
| CA3918 | orf19.4381  | VTC2        | 1.0  | 1.5  | 1.9  | 1.8  | YFL004W | 1.0 | -1.4 | -1.1 | -1.1 | putative polyphosphate synthetase (by homology)                          |
| CA3920 | orf19.5118  | SDS24       | -1.0 | -1.0 | -1.1 | -1.0 | YBR214W | 1.0 | 1.4  | 1.1  | -1.0 | Similar to S. cerevisiae YBR214w which presents strong similarity to hyp |
| CA3921 | orf19.5117  | OLE1        | -1.2 | -1.3 | -1.1 | -1.1 | YGL055W | 1.0 | -2.0 | 1.9  | 2.0  | Stearoyl-CoA desaturase (by homology)                                    |
| CA3922 | orf19.5114  | GRD19       | -1.0 | 1.1  | 1.1  | 1.0  | YOR357C | 1.0 | 1.1  | -1.1 | -1.1 | Probable golgi membrane protein-sorting protein (by homology)            |
| CA3923 | orf19.5113  | ADH2        | 1.2  | 2.4  | 2.1  | 2.0  | YOL086C | 1.0 | 1.6  | 2.2  | 2.4  | alcohol dehydrogenase I (by homology)                                    |
| CA3924 | orf19.5112  | TKL1        | 1.2  | -1.2 | -1.0 | -1.1 | YPR074C | 1.0 | -1.3 | -1.1 | -1.2 | transketolase 1                                                          |
| CA3926 | orf19.5107  | IPF16198    | 1.0  | -1.0 | -1.1 | -1.1 | YPR072W | 1.0 | -1.6 | 1.4  | 1.2  | possible regulatory protein                                              |
| CA3927 | orf19.5106  | DIP2        | -1.0 | -1.1 | -1.1 | -1.0 | YLR129W | 1.0 | -1.2 | -1.1 | 1.2  | beta transducin                                                          |
| CA3928 | orf19.5105  | GAL11       | 1.1  | 1.0  | 1.1  | 1.0  | YOL051W | 1.0 | -1.1 | 1.3  | 1.1  | DNA-directed RNA polymerase II holoenzyme and Kornberg s mediator (      |
| CA3930 | orf19.5104  | LPT1.EXON2  | 1.1  | -1.0 | 1.0  | -1.0 | YPR073C | 1.0 | 1.6  | 2.4  | 3.0  | protein-tyrosine-phosphatase, exon 2                                     |
| CA3933 | orf19.9560  | IPF18281    | -1.0 | -1.2 | -1.3 | -1.1 | YMR026C | 1.0 | -1.1 | 1.0  | -1.1 | similar to Saccharomyces cerevisiae Pex12p peroxisome assembly (by h     |
| CA3934 | orf19.2008  | IPF17119    | -1.1 | 1.0  | -1.1 | 1.0  | YPR118W | 1.0 | 1.3  | 1.2  | 1.5  | unknown function                                                         |
| CA3935 | orf19.2007  | IPF14688    | -1.2 | -1.0 | 1.1  | -1.0 | YDR027C | 1.0 | 1.1  | -1.0 | 1.0  | unknown function                                                         |
| CA3936 |             | COX17       | 1.0  | 1.1  | 1.1  | 1.1  | YLL009C | 1.0 | -1.9 | -2.2 | -2.2 | cysteine-rich cytoplasmic protein(by homology)                           |
| CA3937 | orf19.9557  | IPF14686    | -1.0 | 1.1  | -1.0 | 1.0  | YPL162C | 1.0 | -1.1 | 1.0  | 1.1  | unknown function                                                         |
| CA3938 | orf19.9556  | IPF4764     | 1.1  | 1.2  | 1.1  | 1.1  | YDR028C | 1.0 | 1.0  | -1.0 | -1.1 | unknown Function                                                         |
| CA3940 | orf19.9553  | NIC96       | -1.0 | -1.0 | -1.0 | -1.0 | YFR002W | 1.0 | 1.2  | 1.3  | 1.2  | nuclear pore protein (by homology)                                       |
| CA3942 | orf19.2000  | CHL1        | 1.0  | 1.0  | -1.0 | -1.0 | YPL008W | 1.0 | -1.4 | -1.2 | -1.3 | protein of the DEAH box family (by homology)                             |
| CA3948 | orf19.1993  | RPN9        | -1.2 | -1.1 | -1.0 | -1.0 | YDR427W | 1.0 | -1.1 | 1.4  | 1.5  | 26S proteasome regulatory particle (by homology)                         |
| CA3950 | orf19.9542  | PTM1        | 1.1  | 1.1  | 1.3  | 1.3  | YKL039W | 1.0 | -1.1 | -1.4 | -1.3 | Possibly involved in the TCA cycle (by homology)                         |
| CA3951 | orf19.1409  | VAC7.3      | 1.0  | -1.1 | -1.1 | -1.0 | YNL054W | 1.0 | -2.5 | -2.5 | -2.0 | Vacuolar protein, 3-prime end (by homology)                              |
| CA3954 | orf19.1413  | YFH1        | 1.0  | 1.0  | -1.0 | 1.0  | YDL120W | 1.0 | 1.0  | 1.1  | 1.1  | Regulates mitochondrial iron accumulation (by homology)                  |
| CA3958 | orf19.1416  | COX11       | 1.1  | 1.1  | 1.3  | 1.0  | YPL132W | 1.0 | -1.1 | -1.0 | -1.2 | cytochrome-c oxidase assembly protein by homology to S. cerevisiae       |
| CA3960 | orf19.1419  | IPF11236.5F | -1.0 | 1.0  | -1.0 | -1.0 | YGL233W | 1.0 | -1.0 | -1.0 | 1.1  | similar to Saccharomyces cerevisiae Sec15p component of the exocyst c    |
| CA3961 | orf19.1420  | IPF11235    | -1.0 | -1.1 | 1.0  | 1.0  | YFR043C | 1.0 | -1.1 | 1.1  | 1.1  | unknown function                                                         |
| CA3962 | orf19.1421  | IPF11234    | 1.0  | 1.0  | 1.0  | 1.0  | YIR032C | 1.0 | -1.3 | -1.3 | -1.1 | similar to saccharomyces cerevisiae Dal3p ureidoglycolate hydrolase (by  |
| CA3963 | orf19.1422  | IPF11233    | -1.1 | 1.0  | 1.1  | 1.1  | YBR179C | 1.0 | 1.1  | -1.1 | 1.2  | similar to Saccharomyces cerevisiae Fzo1p required for biogenesis of mi  |
| CA3964 | orf19.1424  | IPF9370     | 1.0  | -1.1 | -1.1 | -1.1 | YMR155W | 1.0 | 1.2  | 1.2  | 1.1  | unknown function                                                         |
| CA3966 | orf19.1427  | IPF9376     | 1.1  | 1.1  | 1.4  | 1.1  | YLR004C | 1.0 | -1.1 | -1.0 | -1.2 | unknown function                                                         |
| CA3968 | orf19.1429  | IPF9378     | -1.0 | -1.1 | -1.1 | -1.1 | YGL127C | 1.0 | -1.1 | -1.2 | 1.0  | similar to Saccharomyces cerevisiae Soh1p suppressor of Hpr1p (by hon    |
| CA3970 | orf19.1542  | IPF6497     | -1.1 | -1.0 | -1.1 | -1.0 | YDL013W | 1.0 | 1.2  | 1.1  | 1.4  | unknown function                                                         |
| CA3972 | orf19.9118  | IPF6504     | 1.1  | 1.0  | -1.0 | 1.0  | YDL099W | 1.0 | 1.0  | -1.0 | 1.2  | unknown function                                                         |
| CA3973 | orf19.1545  | IPF6505     | 1.2  | 1.1  | 1.3  | 1.0  | YMR158W | 1.0 | -1.8 | -1.4 | -1.4 | unknown function                                                         |
| CA3974 | orf19.1546  | IPF6507     | 1.0  | -1.1 | -1.1 | -1.1 | YMR157C | 1.0 | -1.1 | -1.2 | -1.4 | unknown function                                                         |
| CA3975 | orf19.1547  | IPF20152    | 1.0  | 1.0  | -1.1 | -1.0 | YMR156C | 1.0 | -1.7 | -1.4 | -1.6 | unknown function                                                         |
| CA3976 | orf19.1548  | SNU23       | -1.0 | 1.1  | 1.1  | -1.0 | YDL098C | 1.0 | 1.1  | 1.1  | 1.1  | RNA binding zinc finger protein (by homology)                            |
| CA3979 | orf19.1553  | ENT3.3F     | -1.1 | 1.1  | 1.1  | 1.0  | YJR125C | 1.0 | 1.5  | 2.5  | 3.1  | putative endocytosis and cytoskeleton protein, 3-prime end (by homology) |
| CA3982 | orf19.9129  | SAC3        | -1.0 | -1.1 | -1.1 | -1.0 | YDR159W | 1.0 | -1.4 | -1.4 | -1.1 | Leucine permease transcriptional regulator                               |
| CA3983 | orf19.9130  | IPF7133.3   | -1.0 | 1.1  | 1.1  | 1.0  | YLR137W | 1.0 | 1.1  | 1.2  | 1.1  | unknown function, 3-prime end                                            |
| CA3984 | orf19.9132  | HOM2        | -1.3 | 1.3  | 1.3  | 1.2  | YDR158W | 1.0 | 1.8  | 2.3  | 2.8  | Aspartate-semialdehyde dehydrogenase (by homology)                       |
| CA3985 | orf19.1560  | POB3        | -1.3 | -1.1 | -1.0 | -1.0 | YML069W | 1.0 | -1.0 | 1.1  | -1.0 | Binds DNA polymerase delta (by homology)                                 |
| CA3987 | orf19.1563  | ECM3        | 1.2  | 1.2  | 1.6  | 1.2  | YOR092W | 1.0 | -1.1 | -1.1 | 1.6  | Involved in cell wall biogenesis and architecture (by homology).         |
| CA3988 | orf19.1564  | IPF7145     | 1.1  | 1.5  | 1.8  | 1.9  | YDL072C | 1.0 | 1.1  | 1.1  | 1.1  | unknown function                                                         |
| CA3989 | orf19.1565  | IPF7147     | 1.1  | -1.0 | 1.0  | 1.0  | YLR401C | 1.0 | -1.5 | 1.0  | 1.0  | unknown function                                                         |
| CA3990 | orf19.1566  | IPF14782    | 1.1  | -1.6 | -1.9 | -1.6 | YLR409C | 1.0 | -2.2 | -2.1 | -2.1 | beta-transducin (by homology)                                            |
| CA3992 | orf19.1568  | VAM6.3F     | -1.3 | -1.1 | -1.4 | -1.1 | YDL077C | 1.0 | -1.2 | -1.3 | -1.3 | Vacuolar carboxypeptidase Y, 3-prime end (by homology)                   |
| CA3993 | orf19.9142  | IPF8275     | -1.3 | -1.4 | -1.8 | -1.7 | YGR090W | 1.0 | -1.3 | -1.2 | 1.2  | unknown function                                                         |
| CA3994 | orf19.9143  | ERG7        | -1.1 | -1.5 | -1.6 | -1.5 | YHR072W | 1.0 | 1.1  | 1.5  | 1.6  | lanosterol synthase                                                      |
| CA3996 | orf19.1643  | IPF10440    | -1.0 | -1.2 | 1.1  | -1.1 | YGR101W | 1.0 | -1.1 | -1.0 | 1.0  | unknown function                                                         |
| CA3997 | orf19.1642  | LOC1        | -1.0 | -1.1 | -1.0 | -1.1 | YFR001W | 1.0 | 1.0  | 1.5  | 1.8  | putative double-stranded RNA-binding protein (by homology)               |
| CA4000 | orf19.1636  | IPF4262     | -1.0 | 1.0  | 1.1  | 1.0  | YCL032W | 1.0 | -1.9 | -1.9 | -1.6 | similar to Saccharomyces cerevisiae Ste50p pheromone response pathw      |
| CA4001 | orf19.1635  | RPL12       | -1.0 | -1.0 | -1.0 | -1.1 | YEL054C | 1.0 | -2.3 | 1.8  | 2.6  | ribosomal protein                                                        |
| CA4003 | orf19.1633  | IPF4257     | -1.1 | -1.1 | -1.2 | -1.1 | YDR324C | 1.0 | 1.3  | 1.4  | 1.8  | unknown function                                                         |

|        |             |                   |      |      |      |      |         |              |     |      |      |      |                                                                                 |
|--------|-------------|-------------------|------|------|------|------|---------|--------------|-----|------|------|------|---------------------------------------------------------------------------------|
| CA4005 | orf19.1631  | <i>ERG6</i>       | 1.2  | -1.5 | -1.4 | -1.4 | YML008C | <i>ERG6</i>  | 1.0 | -1.3 | 1.0  | 1.0  | sterol transmethylase                                                           |
| CA4006 | orf19.1630  | <i>IPF4253</i>    | -1.1 | -1.1 | -1.1 | -1.0 | YML017W | <i>PSP2</i>  |     |      |      |      | unknown function                                                                |
| CA4007 | orf19.1628  | <i>LAP41</i>      | -1.0 | -1.1 | -1.1 | -1.0 | YKL103C | <i>LAP4</i>  | 1.0 | 1.1  | -1.1 | -1.8 | aminopeptidase ysc1 precursor (by homology)                                     |
| CA4008 | orf19.1626  | <i>DYS1</i>       | -1.1 | -1.1 | -1.1 | -1.1 | YHR068W | <i>DYS1</i>  | 1.0 | 1.1  | 1.3  | 1.9  | deoxyhypusine synthase                                                          |
| CA4010 | orf19.1624  | <i>MAK10.3</i>    | -1.2 | -1.2 | -1.3 | -1.2 | YEL053C | <i>MAK10</i> | 1.0 | -1.0 | -1.0 | 1.4  | glucose-repressible protein, 3-prime end (by homology)                          |
| CA4011 | orf19.1622  | <i>IPF4240</i>    | -1.2 | -1.2 | -1.2 | -1.0 | YDR325W | <i>YCG1</i>  | 1.0 | 1.0  | 1.0  | 1.0  | similar to <i>Saccharomyces cerevisiae</i> Ycg1p condensin G (by homology)      |
| CA4012 | orf19.1621  | <i>GPA2</i>       | 1.1  | 1.1  | 1.2  | -1.1 | YER020W | <i>GPA2</i>  | 1.0 | -1.2 | 1.1  | 1.1  | nucleotide-binding regulatory protein GPA2                                      |
| CA4014 | orf19.1619  | <i>CTK1</i>       | -1.1 | -1.1 | -1.1 | -1.1 | YKL139W | <i>CTK1</i>  | 1.0 | -1.3 | -1.3 | -1.2 | probable cell division protein kinase                                           |
| CA4016 | orf19.1618  | <i>GFA1</i>       | -1.2 | 1.8  | 1.8  | 1.8  | YKL104C | <i>GFA1</i>  | 1.0 | 1.0  | 1.2  | 1.2  | glutamine:fructose-6-phosphate amidotransferase                                 |
| CA4017 | orf19.3447  | <i>PBN1</i>       | 1.0  | 1.0  | 1.0  | -1.0 | YCL052C | <i>PBN1</i>  | 1.0 | 1.4  | 1.7  | 1.0  | protease by homology                                                            |
| CA4018 | orf19.3446  | <i>MOG1</i>       | -1.0 | 1.0  | -1.1 | 1.1  | YJR074W | <i>MOG1</i>  | 1.0 | -1.3 | -1.6 | -1.6 | Ran-Binding Protein by homology                                                 |
| CA4019 | orf19.3445  | <i>HOC1</i>       | 1.0  | -1.0 | -1.0 | 1.0  | YJR075W | <i>HOC1</i>  | 1.0 | -1.0 | 1.1  | 1.4  | GLYCOSYLTRANSFERASE by homology                                                 |
| CA4025 | orf19.3438  | <i>SCJ1</i>       | -1.0 | 1.0  | -1.0 | -1.0 | YMR214W | <i>SCJ1</i>  | 1.0 | -1.4 | 1.2  | 1.4  | Mitochondrial and ER import protein (by homology)                               |
| CA4029 | orf19.3434  | <i>IPF7171.5F</i> | -1.3 | -1.5 | -1.9 | -1.5 | YGR067C |              | 1.0 | -1.4 | -1.2 | -1.1 | unknown function, 5-prime end                                                   |
| CA4030 | orf19.3433  | <i>EBP4</i>       | 1.0  | 4.4  | 6.0  | 4.4  | YHR179W | <i>OYE2</i>  | 1.0 | 1.0  | 1.6  | 3.1  | NADPH dehydrogenase (by homology)                                               |
| CA4033 | orf19.3431  | <i>IPF19795</i>   | 1.1  | 1.1  | 1.0  | -1.0 | YOR330C | <i>MIP1</i>  | 1.0 | 1.1  | 1.3  | 1.4  | similar to <i>Saccharomyces cerevisiae</i> Mip1p DNA-directed DNA polymerase    |
| CA4035 | orf19.3665  | <i>IPF12040</i>   | 1.0  | -1.0 | -1.1 | -1.0 | YPL165C |              | 1.0 | 1.0  | -1.0 | -1.2 | unknown function                                                                |
| CA4036 | orf19.3666  | <i>IPF12042</i>   | -1.1 | -1.1 | -1.1 | 1.0  | YGR093W |              | 1.0 | -1.1 | -1.1 | -1.1 | unknown function                                                                |
| CA4039 | orf19.3669  | <i>SKS1</i>       | -1.5 | -1.1 | -1.5 | -1.3 | YPL026C | <i>SKS1</i>  | 1.0 | 1.0  | 1.3  | 2.0  | serine/threonine kinase by homology                                             |
| CA4040 | orf19.3670  | <i>GAL1</i>       | -1.0 | 1.1  | 1.2  | 1.1  | YDR009W | <i>GAL3</i>  | 1.0 | -1.4 | -1.4 | -1.5 | galactokinase                                                                   |
| CA4041 | orf19.3672  | <i>GAL10</i>      | -1.4 | 1.5  | 1.2  | 1.1  | YBR019C | <i>GAL10</i> | 1.0 | 1.1  | 1.0  | -1.0 | UDP-glucose 4-epimerase by homology                                             |
| CA4042 | orf19.3673  | <i>TRS23</i>      | 1.1  | 1.2  | 1.2  | 1.1  | YDR246W | <i>TRS23</i> |     |      |      |      | targeting and fusion of ER to golgi transport vesicles by homology              |
| CA4044 | orf19.3675  | <i>GAL7</i>       | -1.1 | 2.3  | 2.4  | 1.5  | YBR018C | <i>GAL7</i>  | 1.0 | -1.1 | -1.2 | -1.3 | UDP-glucose-hexose-1-phosphate uridylyltransferase (by homology)                |
| CA4046 | orf19.3677  | <i>IPF9205</i>    | -1.0 | 1.0  | -1.0 | -1.0 | YPL149W | <i>APG5</i>  | 1.0 | 1.1  | 1.4  | 1.4  | similar to <i>Saccharomyces cerevisiae</i> Apg5p involved in autophagy and n    |
| CA4048 | orf19.11163 | <i>IPF9207</i>    | -1.0 | -1.0 | 1.1  | 1.0  | YNL200C |              | 1.0 | -1.0 | -1.1 | -1.4 | unknown function                                                                |
| CA4050 | orf19.425   | <i>10482.EXO1</i> | 1.1  | -1.0 | 1.0  | -1.0 | YOL114C |              | 1.0 | -1.1 | -1.3 | -1.4 | unknown function, exon 2                                                        |
| CA4052 | orf19.427   | <i>10231.EXO1</i> | 1.0  | -1.1 | -1.2 | 1.0  | YBR275C | <i>RIF1</i>  | 1.0 | 1.2  | 1.0  | 1.2  | similar to <i>Saccharomyces cerevisiae</i> Rif1p Rap1p-interacting factor 1, ex |
| CA4053 | orf19.428   | <i>IKS1</i>       | -1.0 | -1.0 | 1.1  | 1.0  | YJL057C | <i>IKS1</i>  | 1.0 | 1.0  | -1.1 | -1.2 | PROBABLE SERINE/THREONINE-PROTEIN KINASE                                        |
| CA4054 | orf19.429   | <i>TRF4</i>       | -1.2 | -1.3 | -1.4 | -1.5 | YOL115W | <i>TRF4</i>  | 1.0 | -1.1 | -1.1 | 1.1  | Topoisomerase I-related protein                                                 |
| CA4055 | orf19.430   | <i>YPT522</i>     | 1.0  | -1.0 | 1.0  | 1.0  | YBR264C | <i>YPT10</i> | 1.0 | 1.1  | -1.0 | 1.1  | GTP-binding protein of the rab family(by homology)                              |
| CA4057 | orf19.432   | <i>IPF7719</i>    | -1.1 | -1.1 | -1.1 | -1.1 | YDR306C |              | 1.0 | 1.0  | -1.1 | -1.3 | unknown function                                                                |
| CA4058 | orf19.8063  | <i>IPF7717</i>    | -1.0 | -1.0 | -1.0 | -1.1 | YGR166W | <i>KRE11</i> | 1.0 | -3.6 | -7.4 | -5.1 | unknown function                                                                |
| CA4059 | orf19.8064  | <i>PRD1</i>       | -1.3 | -1.2 | -1.2 | -1.1 | YCL057W | <i>PRD1</i>  | 1.0 | 1.0  | 1.0  | -1.1 | Proteinase (by homology)                                                        |
| CA4060 | orf19.437   | <i>GRS1</i>       | -1.8 | -1.4 | -1.5 | -1.3 | YBR121C | <i>GRS1</i>  | 1.0 | -1.4 | -1.3 | -1.2 | glycine-tRNA ligase (by homology)                                               |
| CA4061 | orf19.438   | <i>IPF5935</i>    | -1.0 | 1.1  | 1.2  | 1.1  | YHR078W |              | 1.0 | 1.0  | 1.1  | 1.2  | Unknown function                                                                |
| CA4062 | orf19.439   | <i>IPF5933</i>    | 1.1  | -1.1 | -1.1 | -1.1 | YDR296W | <i>MHR1</i>  | 1.0 | -1.5 | -1.4 | -1.6 | similar to <i>Saccharomyces cerevisiae</i> Mhr1p involved in mitochondrial hor  |
| CA4063 | orf19.440   | <i>SDH11</i>      | -1.1 | -1.1 | -1.1 | -1.1 | YKL148C | <i>SDH1</i>  | 1.0 | -1.3 | -1.5 | -2.1 | Succinate dehydrogenase (by homology)                                           |
| CA4064 | orf19.441   | <i>RPT1</i>       | -1.1 | 1.1  | 1.1  | 1.1  | YKL145W | <i>RPT1</i>  | 1.0 | -1.1 | 1.2  | 1.2  | 26S PROTEASE REGULATORY SUBUNIT 7 (by homology)                                 |
| CA4065 | orf19.443   | <i>RPC25</i>      | 1.1  | -1.1 | -1.0 | -1.0 | YKL144C | <i>RPC25</i> | 1.0 | 1.3  | 1.3  | 1.2  | DNA-directed RNA polymerase III (by homology)                                   |
| CA4067 | orf19.445   | <i>IPF5924</i>    | -1.1 | -1.1 | -1.1 | -1.1 | YNR040W |              | 1.0 | -1.0 | 1.0  | 1.0  | unknown function                                                                |
| CA4070 | orf19.6623  | <i>IPF2562</i>    | 1.2  | 1.3  | 1.4  | 1.1  | YKL160W |              | 1.0 | -1.5 | -1.7 | -2.2 | unknown function                                                                |
| CA4071 | orf19.6624  | <i>IPF2561</i>    | 1.1  | 1.0  | 1.1  | -1.0 | YJL044C | <i>GYP6</i>  | 1.0 | 1.2  | 1.2  | 1.3  | unknown function                                                                |
| CA4072 | orf19.6625  | <i>IPF2560</i>    | 1.0  | -1.1 | -1.1 | -1.1 | YNL246W |              | 1.0 | -1.1 | -1.1 | -1.2 | unknown function                                                                |
| CA4074 | orf19.6627  | <i>IPF2557</i>    | 1.2  | -1.2 | -1.1 | -1.0 | YDR476C |              | 1.0 | 1.6  | 2.2  | 1.0  | unknown function                                                                |
| CA4076 | orf19.6629  | <i>IPF2542</i>    | -1.1 | -1.3 | -1.3 | -1.3 | YER019W | <i>ISC1</i>  | 1.0 | 1.0  | 1.3  | 1.3  | putative neutral sphingomyelinase (by homology)                                 |
| CA4077 | orf19.6632  | <i>ACO2</i>       | -1.2 | -1.1 | -1.6 | -1.6 | YJL200C |              | 1.0 | -1.0 | 1.2  | 1.6  | aconitate hydratase (by homology)                                               |
| CA4078 | orf19.6634  | <i>VMA2</i>       | -1.3 | -1.2 | -1.2 | -1.2 | YBR127C | <i>VMA2</i>  | 1.0 | 1.2  | 1.4  | 1.5  | H <sup>+</sup> -transporting ATPase (by homology)                               |
| CA4080 | orf19.6636  | <i>IPF2524</i>    | -1.0 | -1.0 | 1.1  | 1.0  | YPR084W |              | 1.0 | 1.1  | 1.3  | 1.6  | unknown function                                                                |
| CA4082 | orf19.6638  | <i>PTC4</i>       | -1.0 | 1.0  | 1.1  | 1.1  | YBR125C | <i>PTC4</i>  | 1.0 | -1.3 | -1.4 | -1.2 | ser/thr protein phosphatase PP2C(by homology)                                   |
| CA4084 | orf19.6640  | <i>TPS1</i>       | -1.0 | 1.5  | 2.1  | 1.5  | YBR126C | <i>TPS1</i>  | 1.0 | 1.6  | 1.4  | -1.1 | TREHALOSE-6-PHOSPHATE SYNTHASE                                                  |
| CA4086 | orf19.6642  | <i>IPF5014</i>    | -1.0 | -1.0 | -1.0 | 1.0  | YNL263C | <i>YIF1</i>  | 1.0 | 1.0  | 1.4  | 1.4  | unknown function                                                                |
| CA4087 | orf19.6643  | <i>IPF5013</i>    | -1.0 | -1.1 | -1.1 | -1.0 | YOR221C | <i>MCT1</i>  | 1.0 | -1.0 | -1.0 | -1.0 | similar to <i>Saccharomyces cerevisiae</i> Mct1p malonyl-CoA:ACP transferase    |
| CA4088 | orf19.6645  | <i>HMO1</i>       | -1.2 | 1.1  | 1.2  | 1.4  | YDR174W | <i>HMO1</i>  | 1.0 | 1.2  | 1.5  | 1.2  | High-mobility protein 1 by homology                                             |
| CA4089 | orf19.6648  | <i>IPF5009</i>    | -1.1 | -1.1 | -1.1 | -1.1 | YGR245C | <i>SDA1</i>  | 1.0 | 1.3  | 1.7  | 1.3  | unknown function                                                                |
| CA4090 | orf19.6649  | <i>BRF1</i>       | -1.1 | -1.1 | -1.1 | -1.0 | YGR246C | <i>BRF1</i>  | 1.0 | -1.2 | 1.2  | 1.2  | TFIIIB subunit                                                                  |
| CA4092 | orf19.6652  | <i>DBP8</i>       | -1.0 | -1.0 | -1.0 | -1.0 | YHR169W | <i>DBP8</i>  | 1.0 | -1.2 | -1.3 | 1.3  | DEAD box protein ATP-dependent RNA helicase (by homology)                       |
| CA4093 | orf19.6653  | <i>IPF5002</i>    | -1.0 | -1.0 | -1.1 | -1.0 | YHR168W |              | 1.0 | -1.3 | -1.4 | -1.2 | GTP binding protein (by homology)                                               |
| CA4094 | orf19.658   | <i>IPF4004</i>    | -1.1 | -1.1 | -1.3 | -1.1 | YCL061C | <i>MRC1</i>  | 1.0 | 1.0  | 1.1  | -1.1 | unknown function                                                                |
| CA4096 | orf19.661   | <i>KRR1</i>       | 1.1  | -1.0 | 1.0  | -1.0 | YCL059C | <i>KRR1</i>  | 1.0 | 1.4  | 1.9  | 2.1  | involved in cell division and spore germination                                 |
| CA4097 | orf19.663   | <i>GIN4</i>       | -1.1 | -1.1 | -1.0 | -1.1 | YDR507C | <i>GIN4</i>  | 1.0 | -1.4 | 1.0  | -1.3 | ser/thr protein kinase (by homology)                                            |
| CA4099 | orf19.665   | <i>IPF3986</i>    | 1.1  | 1.0  | 1.1  | 1.1  | YLR186W | <i>EMG1</i>  | 1.0 | -1.7 | -2.0 | -1.8 | unknown function                                                                |

|        |             |                 |      |      |      |      |         |               |     |      |      |      |                                                                               |
|--------|-------------|-----------------|------|------|------|------|---------|---------------|-----|------|------|------|-------------------------------------------------------------------------------|
| CA4100 | orf19.666   | <i>IPF3985</i>  | -1.0 | 1.0  | -1.1 | 1.0  | YDR499W | <i>LCD1</i>   | 1.0 | -1.1 | -1.1 | 1.0  | unknown function                                                              |
| CA4102 |             | <i>RPL37B</i>   | 1.1  | 1.1  | 1.1  | 1.1  | YDR500C | <i>RPL37B</i> | 1.0 | 1.2  | 1.3  | 1.5  | Ribosomal protein                                                             |
| CA4103 | orf19.668   | <i>IPF3980</i>  | 1.1  | 1.4  | 1.2  | 1.2  | YLR183C | <i>TOS4</i>   | 1.0 | -1.2 | -1.1 | 1.0  | unknown function                                                              |
| CA4104 | orf19.669   | <i>IPF20157</i> | -1.0 | 1.0  | 1.0  | 1.1  | YNL279W | <i>PRM1</i>   | 1.0 | -1.0 | 1.3  | 1.3  | unknown function                                                              |
| CA4105 | orf19.670   | <i>SMT3</i>     | 1.3  | 1.1  | 1.1  | 1.2  | YDR510W | <i>SMT3</i>   | 1.0 | -2.6 | -1.6 | -1.5 | Ubiquitin-like protein (by homology)                                          |
| CA4107 | orf19.671   | <i>IPF3970</i>  | -1.1 | -1.1 | -1.1 | -1.1 | YLR177W |               | 1.0 | 1.1  | 1.4  | -1.1 | unknown function                                                              |
| CA4108 | orf19.672   | <i>IPF3968</i>  | 1.0  | -1.0 | 1.0  | -1.0 | YDR243C | <i>PRP28</i>  |     |      |      |      | similar to <i>Saccharomyces cerevisiae</i> pre-mRNA splicing factor RNA helic |
| CA4110 | orf19.674   | <i>IPF3965</i>  | 1.1  | 1.0  | 1.0  | 1.0  | YDL209C |               | 1.0 | -1.2 | -1.2 | -1.1 | unknown function                                                              |
| CA4112 | orf19.676   | <i>BIM1</i>     | -1.0 | 1.0  | -1.0 | 1.0  | YER016W | <i>BIM1</i>   | 1.0 | 1.5  | 1.7  | 2.7  | microtubule-binding protein (by homology)                                     |
| CA4113 | orf19.677   | <i>CHO1</i>     | 1.4  | -1.3 | -1.2 | -1.3 | YER026C | <i>CHO1</i>   | 1.0 | -1.1 | -1.2 | -1.7 | Phosphatidyserine synthase                                                    |
| CA4115 | orf19.680   | <i>IPF7706</i>  | -1.2 | -1.3 | -1.3 | -1.2 | YPL063W |               | 1.0 | -1.0 | 1.1  | -1.0 | putative plasma membrane phosphatase (by homology)                            |
| CA4116 | orf19.2775  | <i>IDI1</i>     | 1.2  | -1.0 | 1.0  | 1.0  | YPL117C | <i>IDI1</i>   | 1.0 | 1.2  | 1.8  | 1.6  | isopentenyl-diphosphate delta-isomerase (by homology)                         |
| CA4117 | orf19.2774  | <i>LAB5</i>     | -1.0 | -1.5 | -1.6 | -1.3 | YOR196C | <i>LIP5</i>   | 1.0 | -1.2 | -1.2 | -1.2 | lipoic acid synthase (by homology)                                            |
| CA4118 | orf19.2772  | <i>IPF11952</i> | -1.3 | -1.0 | -1.3 | 1.1  | YPL116W | <i>HOS3</i>   | 1.0 | -1.0 | -1.2 | -1.4 | similar to <i>Saccharomyces cerevisiae</i> Hos3p putative histone deacetylase |
| CA4119 | orf19.2771  | <i>BEM3</i>     | -1.0 | -1.1 | -1.0 | -1.1 | YPL115C | <i>BEM3</i>   | 1.0 | -1.1 | -1.2 | -1.1 | GTPase-activating protein for Cdc42p and Rho1p (by homology)                  |
| CA4120 |             | <i>SOD1.3</i>   | 1.1  | 1.1  | 1.1  | 1.1  | YJR104C | <i>SOD1</i>   | 1.0 | 1.2  | 1.3  | -1.7 | Cu,Zn-superoxide dismutase, 3-prime end                                       |
| CA4122 | orf19.2769  | <i>PBI2</i>     | 1.0  | 1.1  | 1.0  | 1.0  | YNL015W | <i>PBI2</i>   | 1.0 | -1.2 | -1.7 | -2.3 | proteinase B inhibitor 2 (by homology)                                        |
| CA4123 | orf19.2768  | <i>AMS1</i>     | -1.2 | -1.1 | -1.1 | -1.1 | YGL156W | <i>AMS1</i>   | 1.0 | -1.3 | -1.7 | -1.8 | alpha-mannosidase (by homology)                                               |
| CA4127 | orf19.2762  | <i>IPF6629</i>  | 1.7  | 5.0  | 7.2  | 7.7  | YLR109W | <i>AHP1</i>   | 1.0 | -1.0 | -1.1 | -1.3 | unknown function                                                              |
| CA4129 | orf19.11723 | <i>IPF6878</i>  | 1.2  | -1.0 | 1.0  | 1.1  | YLR118C |               | 1.0 | -2.1 | -1.3 | -1.1 | unknown function                                                              |
| CA4130 | orf19.11720 | <i>IPF20009</i> | 1.1  | 1.1  | 1.1  | 1.2  | YBR129C | <i>OPY1</i>   | 1.0 | 1.0  | -1.1 | -1.1 | Unknown function                                                              |
| CA4131 | orf19.11718 | <i>IPF6886</i>  | 1.0  | -1.0 | -1.0 | -1.1 | YKL090W |               | 1.0 | -1.7 | -1.8 | -1.8 | unknown function                                                              |
| CA4132 | orf19.4242  | <i>STE20</i>    | 1.1  | 1.0  | 1.1  | -1.1 | YHL007C | <i>STE20</i>  | 1.0 | -1.5 | -1.5 | -1.1 | serine/threonine-specific protein kinase                                      |
| CA4134 | orf19.4240  | <i>COS162</i>   | -1.0 | 1.0  | 1.0  | -1.0 | YCR044C | <i>PER1</i>   | 1.0 | 1.1  | 1.0  | 1.2  | involved in manganese homeostasis (by homology)                               |
| CA4136 | orf19.4236  | <i>RET2</i>     | -1.5 | -1.1 | -1.2 | -1.2 | YFR051C | <i>RET2</i>   | 1.0 | -1.7 | 1.1  | -1.2 | Coatomer complex delta chain (by homology)                                    |
| CA4137 | orf19.4235  | <i>CNA1</i>     | 1.1  | -1.0 | 1.0  | 1.0  | YGL248W | <i>PDE1</i>   | 1.0 | 1.1  | 1.0  | 1.3  | cyclic nucleotide phosphodiesterase                                           |
| CA4138 | orf19.4234  | <i>IPF11954</i> | -1.1 | -1.1 | -1.1 | -1.1 | YCR054C | <i>CTR86</i>  | 1.0 | -1.2 | -1.3 | -1.2 | unknown function                                                              |
| CA4139 | orf19.4233  | <i>THR4</i>     | -1.1 | -1.1 | -1.1 | 1.0  | YCR053W | <i>THR4</i>   | 1.0 | -1.4 | 1.1  | 1.5  | threonine synthase (by homology)                                              |
| CA4140 | orf19.4232  | <i>IPF11959</i> | -1.1 | -1.2 | -1.0 | -1.1 | YGR046W |               | 1.0 | 1.1  | 1.1  | -1.0 | unknown function                                                              |
| CA4142 | orf19.11705 | <i>PRE4</i>     | -1.0 | 1.1  | 1.1  | 1.1  | YFR050C | <i>PRE4</i>   | 1.0 | 1.3  | 1.6  | 1.5  | 20S proteasome subunit(beta7) (by homology)                                   |
| CA4143 | orf19.4229  | <i>DDP1</i>     | -1.1 | -1.3 | -1.3 | -1.1 | YOR163W | <i>DDP1</i>   | 1.0 | -1.3 | -1.3 | -1.6 | diadenosine and diphosphoinositol polyphosphate phosphohydrolase (by          |
| CA4144 | orf19.4228  | <i>IPF13340</i> | -1.1 | -1.1 | 1.0  | 1.0  | YOR164C |               | 1.0 | -1.6 | -1.1 | -1.2 | unknown function                                                              |
| CA4146 | orf19.11700 | <i>LEU3</i>     | 1.0  | 1.0  | -1.1 | -1.1 | YLR451W | <i>LEU3</i>   | 1.0 | -1.5 | -1.9 | -1.5 | Binds to UASs in promoters of LEU1, LEU2, LEU4, ILV2, ILV5, and GDH           |
| CA4147 | orf19.13211 | <i>ADE8</i>     | 1.1  | -1.1 | -1.1 | -1.1 | YDR408C | <i>ADE8</i>   | 1.0 | 1.1  | 1.1  | 1.4  | Phosphoribosylglycinamide formyltransferase (GART)                            |
| CA4148 | orf19.13213 | <i>IDH2</i>     | -1.0 | 1.4  | 1.4  | 1.4  | YOR136W | <i>IDH2</i>   | 1.0 | -1.6 | -1.6 | -2.3 | Isocitrate dehydrogenase (NAD+) subunit 2, mitochondrial (by homology)        |
| CA4149 | orf19.5792  | <i>SMP3</i>     | 1.0  | 1.1  | 1.1  | 1.1  | YOR149C | <i>SMP3</i>   | 1.0 | -1.2 | -1.0 | 1.0  | Protein kinase C pathway protein                                              |
| CA4150 | orf19.5793  | <i>RPT3</i>     | -1.3 | -1.0 | -1.0 | -1.1 | YDR394W | <i>RPT3</i>   | 1.0 | 1.1  | 1.3  | 1.3  | 26S proteasome regulatory subunit                                             |
| CA4151 | orf19.5796  | <i>SHE9</i>     | 1.0  | -1.1 | -1.1 | 1.0  | YDR393W | <i>SHE9</i>   | 1.0 | 1.1  | 1.1  | 1.0  | causes lethality when overexpressed                                           |
| CA4153 | orf19.5798  | <i>DNL1</i>     | -1.0 | -1.0 | 1.1  | 1.1  | YOR005C | <i>DNL4</i>   | 1.0 | -1.2 | -1.0 | -1.1 | CANAL DNA LIGASE (POLYDEOXYRIBONUCLEOTIDE SYNTHASE [A                         |
| CA4155 | orf19.5801  | <i>RNR21</i>    | 1.2  | 2.9  | 2.7  | 4.0  | YJL026W | <i>RNR2</i>   | 1.0 | 1.3  | 1.8  | 2.4  | ribonucleoside-diphosphate reductase (by homology)                            |
| CA4156 | orf19.5802  | <i>IPF10990</i> | -1.1 | -1.1 | -1.0 | 1.0  | YOR006C |               | 1.0 | -1.4 | 1.0  | -1.1 | unknown function                                                              |
| CA4157 | orf19.5804  | <i>HYU1</i>     | -1.3 | 1.2  | -1.1 | -1.1 | YKL215C |               | 1.0 | -1.2 | -1.1 | 1.1  | hydantoin utilization protein A (hyuA) homolog                                |
| CA4159 | orf19.13228 | <i>ALD5</i>     | 1.5  | -3.3 | -2.7 | -3.7 | YER073W | <i>ALD5</i>   | 1.0 | 1.2  | 1.2  | 2.4  | aldehyde dehydrogenase (NAD+) (by homology)                                   |
| CA4160 | orf19.5808  | <i>IPF9294</i>  | 1.0  | 1.1  | 1.0  | 1.0  | YBR271W |               | 1.0 | -1.2 | -1.2 | 1.0  | unknown function                                                              |
| CA4161 | orf19.5809  | <i>IPF20164</i> | 1.0  | -1.2 | 1.1  | -1.1 | YJL060W |               | 1.0 | 1.4  | 1.1  | 1.4  | putative kynurenine aminotransferase (by homology)                            |
| CA4162 | orf19.5811  | <i>MET1</i>     | 1.0  | -1.0 | 1.0  | 1.1  | YKR069W | <i>MET1</i>   | 1.0 | -1.6 | -1.8 | -1.7 | siroheme synthase (by homology)                                               |
| CA4163 | orf19.5812  | <i>IPF9301</i>  | 1.1  | 1.2  | 1.2  | 1.2  | YOR051C |               | 1.0 | -1.4 | 1.1  | 1.3  | unknown function                                                              |
| CA4164 | orf19.13235 | <i>IPF9302</i>  | 1.4  | 2.4  | 3.2  | 2.3  | YOR052C |               | 1.0 | 1.1  | 1.1  | -1.2 | unknown function                                                              |
| CA4166 | orf19.2967  | <i>TIF34</i>    | -1.2 | -1.2 | -1.2 | -1.1 | YMR146C | <i>TIF34</i>  | 1.0 | -1.7 | -1.4 | -1.2 | Translation initiation factor eIF3, p39 subunit                               |
| CA4167 | orf19.2966  | <i>IPF7778</i>  | -1.2 | 1.0  | -1.0 | -1.0 | YDL086W |               | 1.0 | 1.3  | 1.5  | 1.4  | putative carboxymethylenebutenolidase (dienelactone hydrolase, DLH) (t        |
| CA4168 | orf19.2965  | <i>IPF7781</i>  | -1.1 | 1.0  | -1.0 | -1.0 | YDL100C |               | 1.0 | 1.2  | 1.6  | 1.4  | putative pump-driving ATPase                                                  |
| CA4169 | orf19.2964  | <i>RSC2</i>     | -1.3 | -1.1 | -1.4 | -1.4 | YGR056W | <i>RSC1</i>   | 1.0 | 1.2  | 1.5  | 1.7  | Member of RSC complex, which remodels the structure of chromatin              |
| CA4173 | orf19.2960  | <i>FRS2</i>     | -1.1 | -1.1 | -1.0 | -1.1 | YFL022C | <i>FRS2</i>   | 1.0 | -1.3 | 1.0  | 1.4  | phenylalanine-tRNA ligase beta chain, cytosolic (by homolog                   |
| CA4177 | orf19.2956  | <i>MGM101</i>   | -1.0 | 1.0  | 1.1  | 1.0  | YJR144W | <i>MGM101</i> | 1.0 | -2.4 | -2.3 | -2.0 | mitochondrial genome maintenance protein (by homology)                        |
| CA4179 | orf19.2953  | <i>TOM20</i>    | 1.2  | 1.1  | 1.5  | 1.4  | YGR082W | <i>TOM20</i>  | 1.0 | 1.2  | 1.1  | -1.1 | mitochondrial outer membrane import receptor subunit, 20 kD                   |
| CA4181 | orf19.2951  | <i>HOM6</i>     | 1.0  | 1.0  | 1.0  | -1.0 | YJR139C | <i>HOM6</i>   | 1.0 | -1.0 | 1.0  | -1.1 | homoserine dehydrogenase (by homology)                                        |
| CA4182 | orf19.10466 | <i>IPF19797</i> | 1.1  | -1.1 | -1.3 | -1.0 | YJR138W | <i>IML1</i>   | 1.0 | -2.1 | -2.1 | -2.4 | similar to <i>Saccharomyces cerevisiae</i> Iml1pinvolved in chromosomal stabl |
| CA4183 | orf19.10465 | <i>SNO1</i>     | -1.0 | -2.2 | -2.1 | -1.8 | YMR095C | <i>SNO1</i>   | 1.0 | -1.1 | 1.1  | -1.1 | hisH-like protein (by homology)                                               |
| CA4184 | orf19.2947  | <i>SNZ1</i>     | -1.2 | -3.6 | -4.6 | -2.8 | YMR096W | <i>SNZ1</i>   | 1.0 | -1.1 | -1.1 | 1.2  | stationary phase protein by homology                                          |
| CA4187 | orf19.12003 | <i>IPF7524</i>  | 1.0  | 1.0  | 1.0  | 1.1  | YLR065C |               | 1.0 | 1.3  | 1.2  | 1.6  | unknown function                                                              |
| CA4190 | orf19.12006 | <i>IPF7530</i>  | -1.0 | 1.2  | 1.6  | 1.3  | YOL075C |               | 1.0 | 1.2  | 1.2  | 1.2  | ATP-binding-cassette protein (by homology to <i>A.gambiae</i> )               |



|        |             |                 |      |      |      |      |         |               |      |      |      |                                              |                                                                              |
|--------|-------------|-----------------|------|------|------|------|---------|---------------|------|------|------|----------------------------------------------|------------------------------------------------------------------------------|
| CA4191 | orf19.12007 | <i>IPF7531</i>  | -1.0 | 1.3  | 1.3  | 1.2  | YER156C | 1.0           | 1.5  | 2.1  | 2.8  | unknown function                             |                                                                              |
| CA4192 | orf19.4533  | <i>IPF7533</i>  | -1.1 | -1.1 | -1.0 | -1.0 | YDR117C | 1.0           | -1.6 | -1.5 | -1.5 | unknown function                             |                                                                              |
| CA4193 | orf19.4534  | <i>IPF7535</i>  | -1.1 | 1.1  | 1.1  | -1.0 | YBR273C | 1.0           | -1.1 | -1.2 | -1.2 | unknown function                             |                                                                              |
| CA4194 | orf19.4535  | <i>PTR3</i>     | -1.1 | -1.0 | -1.0 | -1.0 | YFR029W | <i>PTR3</i>   | 1.0  | -1.1 | 1.0  | 1.1                                          | transcriptional regulator (by homology)                                      |
| CA4195 | orf19.4536  | <i>CYS4</i>     | -1.2 | -1.0 | 1.1  | -1.0 | YGR155W | <i>CYS4</i>   | 1.0  | 1.1  | 1.5  | 1.8                                          | cystathionine beta-synthase (by homology)                                    |
| CA4196 | orf19.4537  | <i>DST1</i>     | 1.0  | -1.0 | -1.0 | -1.1 | YGL043W | <i>DST1</i>   | 1.0  | -1.9 | -1.6 | -1.3                                         | RNA polymerase II elongation factor (by homology)                            |
| CA4197 | orf19.4538  | <i>IPF8057</i>  | 1.0  | -1.0 | 1.0  | 1.0  | YGL044C | <i>RNA15</i>  | 1.0  | -1.1 | 1.1  | 1.2                                          | similar to Saccharomyces cerevisiae Rna15p component of pre-mRNA 3           |
| CA4199 | orf19.4540  | <i>UBC8</i>     | 1.3  | 2.1  | 3.6  | 2.5  | YEL012W | <i>UBC8</i>   | 1.0  | 1.1  | -1.0 | -1.1                                         | ubiquitin-conjugating enzyme (by homology)                                   |
| CA4200 | orf19.4542  | <i>CCL1</i>     | 1.1  | -1.0 | -1.0 | 1.0  | YPR025C | <i>CCL1</i>   | 1.0  | -1.1 | 1.1  | 1.1                                          | cyclin (by homology)                                                         |
| CA4206 | orf19.4550  | <i>IPF9079</i>  | 1.1  | 1.1  | 1.3  | 1.2  | YCR023C | 1.0           | 1.2  | 1.3  | 1.4  | Membrane transporter (by homology)           |                                                                              |
| CA4207 | orf19.4551  | <i>YAT1</i>     | -1.1 | -1.1 | -1.0 | 1.0  | YAR035W | <i>YAT1</i>   | 1.0  | -1.5 | -1.6 | -1.4                                         | carnitine acetyltransferase (by homology)                                    |
| CA4209 | orf19.8427  | <i>DEP1.3F</i>  | -1.5 | -1.2 | -1.8 | -1.3 | YAL013W | <i>DEP1</i>   | 1.0  | -1.1 | 1.1  | 1.2                                          | Regulator of phospholipid metabolism, 3-prime end (by homology)              |
| CA4211 | orf19.809   | <i>IPF5052</i>  | -1.0 | -1.1 | -1.1 | -1.0 | YOL041C | <i>NOP12</i>  | 1.0  | -1.3 | -1.3 | -1.4                                         | RNA-binding protein (by homology)                                            |
| CA4212 | orf19.810   | <i>HFM1</i>     | 1.0  | 1.0  | -1.0 | -1.0 | YGL251C | <i>HFM1</i>   | 1.0  | -1.2 | -1.2 | -1.1                                         | DNA/RNA helicase by homology                                                 |
| CA4213 | orf19.811   | <i>IPF5795</i>  | -1.0 | -1.1 | -1.1 | -1.0 | YLR283W | 1.0           | -1.2 | -1.3 | -1.4 | unknown function                             |                                                                              |
| CA4215 | orf19.8434  | <i>SSY1</i>     | 1.0  | 1.1  | 1.1  | 1.0  | YDR160W | <i>SSY1</i>   | 1.0  | 1.2  | 1.1  | 1.1                                          | Regulator of transporters (by homology)                                      |
| CA4216 | orf19.8435  | <i>IPF5806</i>  | -1.2 | 1.2  | 1.1  | 1.1  | YLR422W | 1.0           | -1.1 | -1.2 | -1.3 | unknown function                             |                                                                              |
| CA4218 | orf19.819   | <i>ACP1</i>     | 1.2  | -1.1 | 1.3  | 1.3  | YKL192C | <i>ACP1</i>   | 1.0  | 1.1  | -1.1 | -1.3                                         | mitochondrial acyl carrier protein (by homology)                             |
| CA4219 | orf19.820   | <i>SDS22</i>    | 1.1  | 1.1  | 1.0  | 1.1  | YKL193C | <i>SDS22</i>  | 1.0  | 1.4  | 1.1  | -1.2                                         | regulatory subunit for the mitotic function of type I protein phosphatase (t |
| CA4222 | orf19.825   | <i>GCD7</i>     | 1.1  | 1.1  | 1.2  | 1.1  | YLR291C | <i>GCD7</i>   | 1.0  | -1.0 | 1.2  | 1.3                                          | translation initiation factor eIF2b subunit (by homology)                    |
| CA4225 |             | <i>RPL39.3</i>  | 1.4  | 1.1  | 1.2  | 1.1  | YMR194W | <i>RPL36A</i> |      |      |      |                                              | ribosomal protein L39, 3-prime end                                           |
| CA4226 | orf19.828   | <i>IPF8752</i>  | -1.1 | -1.2 | -1.3 | -1.1 | YMR193W | <i>MRPL24</i> | 1.0  | 1.1  | -1.0 | -1.3                                         | similar to Saccharomyces cerevisiae Mrpl24p ribosomal protein of the lar     |
| CA4227 | orf19.829   | <i>SCH9</i>     | 1.2  | 1.4  | 1.9  | 1.4  | YHR205W | <i>SCH9</i>   | 1.0  | -1.3 | -1.0 | -1.0                                         | strong similarity to S.pombe sck1 protein kinase (by homology)               |
| CA4228 | orf19.831   | <i>IPF16057</i> | 1.1  | 1.0  | 1.0  | 1.0  | YHL025W | <i>SNF6</i>   | 1.0  | -1.1 | 1.3  | 1.1                                          | unknown function                                                             |
| CA4231 | orf19.514   | <i>SNP3</i>     | 1.1  | 1.1  | 1.0  | -1.0 | YBL026W | <i>LSM2</i>   | 1.0  | -1.0 | -1.3 | 1.0                                          | snRNP-related protein (by homology)                                          |
| CA4232 | orf19.515   | <i>IPF12484</i> | 1.0  | -1.1 | 1.0  | 1.0  | YER137C | 1.0           | -1.5 | -1.4 | -1.4 | unknown function                             |                                                                              |
| CA4233 | orf19.516   | <i>RFT1</i>     | 1.2  | -1.1 | -1.0 | -1.0 | YBL020W | <i>RFT1</i>   | 1.0  | 1.0  | 1.0  | 1.2                                          | nuclear division protein (by homology)                                       |
| CA4234 | orf19.517   | <i>HAP3</i>     | 1.1  | -1.0 | 1.1  | 1.0  | YBL021C | <i>HAP3</i>   | 1.0  | -1.3 | -1.4 | -1.3                                         | CCAAT-binding factor subunit (by homology)                                   |
| CA4235 | orf19.518   | <i>NCL1</i>     | -1.3 | -1.3 | -1.5 | -1.2 | YBL024W | <i>NCL1</i>   | 1.0  | 1.1  | 1.1  | 1.3                                          | Probable proliferating-cell nucleolar antigen (by homology)                  |
| CA4236 | orf19.519   | <i>IPF8166</i>  | -1.0 | 1.0  | 1.0  | 1.0  | YBL025W | <i>RRN10</i>  | 1.0  | 1.2  | 1.2  | 1.1                                          | unknown function                                                             |
| CA4238 | orf19.522   | <i>PIM1</i>     | -1.0 | -1.0 | -1.1 | -1.2 | YBL022C | <i>PIM1</i>   | 1.0  | -1.2 | -1.2 | -1.2                                         | mitochondrial ATP-dependent protease (by homology)                           |
| CA4240 | orf19.526   | <i>NHP2</i>     | 1.1  | 1.1  | 1.1  | 1.1  | YDL208W | <i>NHP2</i>   | 1.0  | 1.7  | 1.9  | 2.6                                          | nucleolar rRNA processing protein (by homology)                              |
| CA4242 | orf19.528   | <i>SEC26</i>    | -1.3 | -1.1 | -1.5 | -1.2 | YDR238C | <i>SEC26</i>  |      |      |      |                                              | beta chain of secretory vesicles coatomer complex (by homology)              |
| CA4247 | orf19.536   | <i>TAF90</i>    | 1.1  | 1.1  | 1.1  | -1.1 | YBR198C | <i>TAF90</i>  | 1.0  | -1.1 | 1.1  | 1.1                                          | Probable transcription-associated factor protein                             |
| CA4248 | orf19.537   | <i>IPF4294</i>  | -1.0 | 1.0  | 1.0  | -1.0 | YBR197C | 1.0           | -1.9 | -2.0 | -1.2 | unknown function                             |                                                                              |
| CA4249 | orf19.538   | <i>IPF4293</i>  | 1.0  | 1.1  | 1.1  | 1.0  | YPL076W | <i>GPI2</i>   | 1.0  | -1.2 | 1.1  | 1.1                                          | similar to Saccharomyces cerevisiae Gpi2p N-acetylglucosaminyl-phospt        |
| CA4250 | orf19.539   | <i>IPF4292</i>  | -1.0 | 1.0  | 1.0  | 1.1  | YNL239W | <i>LAP3</i>   | 1.0  | 1.1  | 1.1  | 1.0                                          | bleomycin Hydrolase                                                          |
| CA4255 | orf19.543   | <i>FUM11</i>    | -1.2 | -2.0 | -2.1 | -2.0 | YPL262W | <i>FUM1</i>   | 1.0  | -1.5 | -1.6 | -2.3                                         | fumarate hydratase                                                           |
| CA4256 | orf19.544   | <i>IPF4282</i>  | -1.0 | -1.2 | -1.2 | -1.1 | YIR015W | <i>RPR2</i>   | 1.0  | -1.5 | -1.5 | -1.5                                         | unknown function                                                             |
| CA4257 |             | <i>PRE6</i>     | 1.0  | 1.1  | 1.1  | 1.1  | YOL038W | <i>PRE6</i>   | 1.0  | 1.1  | 1.4  | 1.4                                          | 20S proteasome subunit                                                       |
| CA4258 | orf19.547   | <i>IPF4279</i>  | -1.1 | 1.0  | 1.1  | 1.0  | YKL113C | <i>RAD27</i>  | 1.0  | -1.5 | -1.5 | -1.6                                         | unknown function                                                             |
| CA4259 | orf19.548   | <i>CDC10</i>    | -1.0 | -1.0 | -1.0 | -1.1 | YCR002C | <i>CDC10</i>  | 1.0  | 1.1  | 1.5  | 1.3                                          | cell division control protein                                                |
| CA4260 | orf19.549   | <i>IPF4276</i>  | 1.1  | -1.1 | -1.1 | -1.0 | YCR003W | <i>MRPL32</i> | 1.0  | -1.1 | -1.1 | -1.2                                         | similar to Saccharomyces cerevisiae Mrpl32p putative mitochondrial ribo:     |
| CA4261 | orf19.550   | <i>PDX3</i>     | -1.1 | 1.0  | -1.0 | 1.0  | YBR035C | <i>PDX3</i>   | 1.0  | 1.1  | -1.1 | -1.1                                         | pyridoxamine-phosphate oxidase (by homology)                                 |
| CA4266 | orf19.6660  | <i>IPF2283</i>  | -1.1 | 1.3  | 1.3  | 1.4  | YHR131C | 1.0           | -1.0 | -1.2 | 1.0  | unknown function                             |                                                                              |
| CA4268 | orf19.6662  | <i>IPF2287</i>  | 1.0  | 1.0  | 1.1  | 1.0  | YOL008W | 1.0           | -1.2 | -1.1 | -1.2 | unknown function                             |                                                                              |
| CA4269 | orf19.6663  | <i>RPS25B</i>   | 1.2  | 1.0  | 1.0  | 1.1  | YLR333C | <i>RPS25B</i> | 1.0  | 1.2  | 1.4  | 1.9                                          | Cytosolic ribosomal protein (by homology)                                    |
| CA4270 | orf19.6665  | <i>NUP2</i>     | -1.3 | -1.6 | -2.0 | -1.6 | YLR335W | <i>NUP2</i>   | 1.0  | -2.3 | -2.7 | -2.1                                         | Nuclear pore protein (by homology)                                           |
| CA4271 | orf19.6667  | <i>SAP30</i>    | 1.0  | 1.0  | -1.0 | 1.0  | YMR263W | <i>SAP30</i>  | 1.0  | 2.2  | 1.4  | -1.1                                         | Subunit of the histone deacetylase B complex (by homology)                   |
| CA4272 | orf19.6668  | <i>CUE1</i>     | 1.1  | 1.1  | 1.1  | 1.2  | YMR264W | <i>CUE1</i>   | 1.0  | -1.1 | 1.0  | 1.1                                          | Involved in ubiquitination and degradation at the ER surface (by homology)   |
| CA4273 | orf19.6670  | <i>CAC2</i>     | -1.0 | 1.1  | -1.0 | -1.0 | YML102W | <i>CAC2</i>   | 1.0  | -1.0 | 1.0  | -1.1                                         | Chromatin assembly complex, subunit p60 (by homology)                        |
| CA4275 | orf19.6672  | <i>MDJ1</i>     | 1.0  | 1.0  | 1.0  | 1.0  | YFL016C | <i>MDJ1</i>   | 1.0  | 1.0  | 1.1  | -1.2                                         | Heat shock protein - chaperone (by homology)                                 |
| CA4277 | orf19.6674  | <i>BTS1</i>     | -1.1 | 1.0  | -1.0 | 1.1  | YPL069C | <i>BTS1</i>   | 1.0  | 1.0  | -1.1 | -1.1                                         | Geranylgeranyl diphosphate synthase (by homology)                            |
| CA4279 | orf19.6676  | <i>DPH51</i>    | 1.1  | 1.1  | 1.2  | -1.0 | YLR172C | <i>DPH5</i>   | 1.0  | 1.1  | 1.3  | 1.4                                          | Diphthamide methyltransferase (by homology)                                  |
| CA4288 | orf19.6685  | <i>IPF6662</i>  | 1.0  | -1.0 | 1.0  | -1.0 | YJR050W | <i>ISY1</i>   | 1.0  | -1.9 | -2.3 | -2.2                                         | similar to Saccharomyces cerevisiae Isy1p pre-mRNA splicing factor (by       |
| CA4289 | orf19.6686  | <i>IPF6665</i>  | -1.0 | -1.3 | -1.3 | -1.2 | YGR145W | 1.0           | -1.2 | -1.3 | -1.1 | unknown function                             |                                                                              |
| CA4294 | orf19.6691  | <i>ERC1</i>     | -1.0 | -1.4 | -1.6 | -1.5 | YHR032W | 1.0           | -1.7 | -1.3 | 1.2  | ethionine resistance protein (by homology)   |                                                                              |
| CA4296 | orf19.6693  | <i>IPF2605</i>  | -1.4 | -1.2 | -1.4 | -1.2 | YOL098C | 1.0           | -2.0 | -2.1 | -1.8 | unknown function                             |                                                                              |
| CA4299 | orf19.6698  | <i>IPF2598</i>  | 1.0  | 1.0  | -1.0 | 1.0  | YCR024C | 1.0           | 1.2  | 1.0  | 1.2  | unknown function                             |                                                                              |
| CA4300 | orf19.6699  | <i>HIS2</i>     | -1.0 | 1.2  | 1.2  | 1.1  | YFR025C | <i>HIS2</i>   | 1.0  | -1.3 | 1.1  | 1.1                                          | Histidinol phosphatase (by homology)                                         |
| CA4301 | orf19.6701  | <i>IPF2593</i>  | -1.7 | -1.3 | -1.5 | -1.6 | YHR020W | 1.0           | -1.2 | 1.4  | 1.7  | amino acid-tRNA ligase homolog (by homology) |                                                                              |

|        |             |                   |      |      |      |      |         |              |     |      |      |      |                                                                                   |
|--------|-------------|-------------------|------|------|------|------|---------|--------------|-----|------|------|------|-----------------------------------------------------------------------------------|
| CA4302 | orf19.6702  | <i>DED81</i>      | -1.2 | -1.0 | -1.3 | -1.2 | YHR019C | <i>DED81</i> | 1.0 | 1.1  | 1.5  | 1.5  | Asparaginyl-tRNA synthetase (by homology)                                         |
| CA4305 | orf19.6705  | <i>IPF6654</i>    | 1.0  | -1.0 | 1.0  | -1.1 | YBL060W |              | 1.0 | -1.0 | -1.1 | -1.1 | unknown function                                                                  |
| CA4306 | orf19.6706  | <i>GYP7</i>       | -1.0 | 1.1  | 1.0  | 1.1  | YDL234C | <i>GYP7</i>  | 1.0 | -1.2 | -1.1 | -1.5 | GTPase activating protein (by homology)                                           |
| CA4307 | orf19.6707  | <i>IPF20013</i>   | 1.0  | 1.0  | 1.0  | -1.0 | YNL217W |              | 1.0 | 1.1  | 1.0  | 1.3  | Unknown function                                                                  |
| CA4312 | orf19.4112  | <i>IPF2122</i>    | -1.2 | -1.3 | -1.3 | -1.3 | YJR142W |              | 1.0 | -2.2 | -1.6 | -1.6 | similar to thiamin pyrophosphokinase                                              |
| CA4314 | orf19.4109  | <i>PMT4</i>       | 1.0  | 1.6  | 2.1  | 1.8  | YJR143C | <i>PMT4</i>  | 1.0 | -1.5 | -1.0 | 1.2  | Mannosyltransferase (by homology)                                                 |
| CA4315 | orf19.4107  | <i>PPX1</i>       | -1.1 | -1.1 | -1.1 | -1.0 | YHR201C | <i>PPX1</i>  | 1.0 | -1.8 | -1.5 | -1.2 | Exopolyphosphatase (by homology)                                                  |
| CA4316 | orf19.4106  | <i>IPF2111</i>    | -1.0 | 1.0  | 1.0  | 1.0  | YJR141W |              | 1.0 | -1.8 | -1.9 | -2.3 | unknown function                                                                  |
| CA4317 | orf19.4105  | <i>IPF2109</i>    | 1.0  | -1.0 | -1.2 | -1.0 | YMR048W | <i>CSM3</i>  | 1.0 | -1.4 | -1.5 | -1.6 | unknown function                                                                  |
| CA4319 | orf19.4102  | <i>RPN10</i>      | 1.0  | 1.1  | 1.1  | 1.1  | YHR200W | <i>RPN10</i> | 1.0 | 1.1  | 1.3  | 1.4  | Protein degradation (by homology)                                                 |
| CA4320 | orf19.4099  | <i>ECM17</i>      | -1.1 | 1.2  | -1.2 | -1.2 | YJR137C | <i>ECM17</i> | 1.0 | -1.6 | -1.1 | -1.1 | Putative sulfite reductase (by homology)                                          |
| CA4321 | orf19.4100  | <i>KAR3.53</i>    | -1.0 | -1.0 | -1.0 | 1.0  | YPR141C | <i>KAR3</i>  | 1.0 | -1.0 | -1.2 | -1.4 | Kinesin-related protein, internal fragment                                        |
| CA4323 | orf19.4096  | <i>IPF2096</i>    | -1.1 | -1.1 | -1.2 | -1.1 | YPR140W |              | 1.0 | -1.2 | -1.1 | -1.5 | putative acyltransferase (by homology)                                            |
| CA4326 | orf19.4093  | <i>IPF2093</i>    | -1.2 | -1.3 | -1.5 | -1.5 | YGR103W | <i>RRP13</i> | 1.0 | -1.7 | -1.2 | -1.0 | nuclear protein of unknown function (by homology)                                 |
| CA4327 | orf19.4092  | <i>IPF2091</i>    | 1.1  | -1.1 | -1.0 | -1.0 | YGR102C |              | 1.0 | -3.3 | -1.4 | -1.2 | unknown function                                                                  |
| CA4328 | orf19.4091  | <i>IPF2090</i>    | 1.0  | -1.0 | -1.0 | -1.0 | YGR104C | <i>SRB5</i>  | 1.0 | -1.5 | -2.0 | -1.8 | similar to <i>Saccharomyces cerevisiae</i> Srb5p DNA-directed RNA polymera        |
| CA4329 |             | <i>VMA21</i>      | 1.1  | 1.0  | -1.0 | -1.0 | YGR105W | <i>VMA21</i> | 1.0 | 1.1  | -1.1 | -1.1 | Vacuolar H <sup>+</sup> -ATPase assembly (by homology)                            |
| CA4331 | orf19.4089  | <i>IPF2086</i>    | -1.1 | -1.2 | -1.5 | -1.3 | YOR057W | <i>SGT1</i>  | 1.0 | -1.3 | -1.4 | -1.2 | unknown function                                                                  |
| CA4332 | orf19.4088  | <i>GLO2</i>       | -1.1 | 1.0  | 1.1  | 1.0  | YDR272W | <i>GLO2</i>  | 1.0 | 1.0  | -1.2 | -1.4 | Glyoxalase II (hydroxyacylglutathione hydrolase) (by homology)                    |
| CA4333 | orf19.4086  | <i>IPF2083</i>    | 1.1  | -1.0 | 1.0  | 1.0  | YNL056W |              | 1.0 | -1.4 | -1.1 | -1.1 | unknown function                                                                  |
| CA4335 | orf19.4084  | <i>GAL83</i>      | -1.0 | 1.1  | -1.1 | -1.1 | YER027C | <i>GAL83</i> | 1.0 | 1.2  | 1.1  | 1.1  | Glucose repression protein (by homology)                                          |
| CA4338 | orf19.6709  | <i>IPF3616</i>    | -1.0 | 1.0  | 1.0  | 1.1  | YNR064C |              | 1.0 | -1.1 | 1.1  | 1.0  | Unknown function                                                                  |
| CA4340 | orf19.6712  | <i>IPF3621</i>    | -1.1 | -1.1 | -1.2 | -1.1 | YJR134C | <i>SGM1</i>  | 1.0 | -2.0 | -2.5 | -2.1 | unknown function                                                                  |
| CA4342 | orf19.6716  | <i>IPF3629</i>    | 1.0  | 1.0  | 1.1  | -1.1 | YBR236C | <i>ABD1</i>  | 1.0 | 1.1  | 1.0  | 1.0  | RNA (guanine-N7-) methyltransferase                                               |
| CA4343 | orf19.6717  | <i>IPF3630</i>    | 1.0  | 1.1  | 1.1  | 1.0  | YHR049W |              | 1.0 | -1.9 | -1.1 | 1.2  | unknown function                                                                  |
| CA4345 | orf19.6719  | <i>IPF3633.3</i>  | -1.0 | -1.0 | -1.1 | -1.0 | YJR140C | <i>HIR3</i>  | 1.0 | -1.2 | -1.1 | -1.0 | similar to <i>Saccharomyces cerevisiae</i> Hir3p involved in cell cycle regulatic |
| CA4346 | orf19.6720  | <i>IPF3634</i>    | 1.0  | -1.0 | 1.1  | 1.0  | YDR090C |              | 1.0 | 1.0  | -1.0 | 1.1  | unknown function                                                                  |
| CA4347 | orf19.6722  | <i>IPF3636</i>    | -1.0 | -1.1 | -1.1 | -1.1 | YER162C | <i>RAD4</i>  | 1.0 | -1.4 | -1.3 | -1.5 | similar to <i>Saccharomyces cerevisiae</i> Rad4p excision repair protein (by hc   |
| CA4352 | orf19.6726  | <i>IPF3642</i>    | 1.0  | 1.1  | -1.0 | -1.0 | YER161C | <i>SPT2</i>  | 1.0 | -2.6 | -2.4 | -2.7 | Unknown function                                                                  |
| CA4353 | orf19.6727  | <i>IPF3645</i>    | -1.1 | -1.1 | -1.0 | -1.0 | YMR283C | <i>RIT1</i>  | 1.0 | 1.0  | -1.2 | -1.2 | similar to <i>Saccharomyces cerevisiae</i> Rit1p initiator tRNA phosphoribosyl-   |
| CA4355 | orf19.6730  | <i>IPF3649</i>    | 1.0  | 1.1  | -1.1 | -1.0 | YCR016W |              | 1.0 | -1.1 | 1.2  | 1.4  | unknown function                                                                  |
| CA4357 | orf19.6732  | <i>IPF19800</i>   | -1.0 | 1.0  | 1.0  | 1.0  | YCR015C |              | 1.0 | 1.1  | 1.1  | 1.1  | unknown function                                                                  |
| CA4359 | orf19.6736  | <i>IPF6054</i>    | -1.0 | -1.0 | -1.1 | -1.0 | YOR205C |              | 1.0 | -1.4 | -1.1 | 1.0  | unknown function                                                                  |
| CA4361 | orf19.13096 | <i>IPF16104</i>   | -1.1 | -1.1 | -1.2 | -1.3 | YJR119C |              | 1.0 | 1.0  | -1.1 | -1.1 | unknown function                                                                  |
| CA4362 | orf19.5653  | <i>ATP2</i>       | 2.1  | 1.4  | 1.2  | 1.2  | YJR121W | <i>ATP2</i>  | 1.0 | -1.4 | -1.4 | -2.7 | F1F0-ATPase complex, F1 beta subunit (by homology)                                |
| CA4363 | orf19.5654  | <i>STE24</i>      | 1.1  | 1.4  | 1.8  | 1.6  | YJR117W | <i>STE24</i> | 1.0 | -1.1 | 1.1  | 1.1  | zinc metallo-protease by homology                                                 |
| CA4366 | orf19.5657  | <i>SWI1</i>       | 1.2  | 1.3  | 1.7  | 1.2  | YPL016W |              | 1.0 | -1.3 | -1.7 | -1.8 | Transcription regulation by homology                                              |
| CA4367 | orf19.5658  | <i>MNN10</i>      | 1.1  | -1.0 | 1.1  | 1.0  | YDR245W | <i>MNN10</i> |     |      |      |      | galactosyltransferase (by homology)                                               |
| CA4368 | orf19.5660  | <i>PEX10.3</i>    | 1.1  | -1.0 | -1.1 | 1.0  | YDR265W | <i>PEX10</i> | 1.0 | -1.4 | -1.5 | -1.3 | peroxisomal assembly protein, 3-prime end (by homology)                           |
| CA4370 | orf19.5661  | <i>IPF5279</i>    | -1.2 | 1.1  | -1.1 | 1.0  | YHR076W |              | 1.0 | -1.2 | -1.2 | -1.2 | unknown function                                                                  |
| CA4371 | orf19.5662  | <i>PEP7</i>       | -1.1 | -1.0 | -1.1 | -1.0 | YDR323C | <i>PEP7</i>  | 1.0 | 1.0  | -1.0 | -1.1 | vacuolar segregation protein by homology                                          |
| CA4372 | orf19.5663  | <i>IPF5282</i>    | 1.0  | 1.0  | 1.0  | -1.0 | YMR034C |              | 1.0 | 1.3  | 1.3  | 1.1  | unknown function                                                                  |
| CA4373 | orf19.5664  | <i>IPF5287</i>    | -1.1 | -1.1 | -1.1 | -1.1 | YMR032W | <i>HOF1</i>  | 1.0 | -1.1 | 1.1  | 1.2  | signal transduction protein (by homology)                                         |
| CA4374 | orf19.5665  | <i>IPF5288</i>    | 1.0  | 1.1  | 1.2  | 1.1  | YMR041C |              | 1.0 | 1.1  | -1.0 | -1.1 | Unknown function                                                                  |
| CA4375 | orf19.5666  | <i>IPF11309</i>   | 1.1  | -1.1 | -1.1 | 1.0  | YMR039C | <i>SUB1</i>  | 1.0 | 1.1  | 1.2  | 1.3  | unknown function                                                                  |
| CA4376 | orf19.5667  | <i>IPF11307</i>   | -1.0 | 1.0  | 1.1  | 1.0  | YKL064W | <i>MNR2</i>  | 1.0 | 1.1  | 1.2  | 1.1  | unknown function                                                                  |
| CA4378 | orf19.5671  | <i>IPF11299</i>   | -1.0 | 1.1  | 1.1  | 1.0  | YCR030C |              | 1.0 | -1.2 | -1.0 | 1.1  | unknown function                                                                  |
| CA4379 | orf19.5672  | <i>MEP2</i>       | 1.0  | 1.0  | 1.0  | -1.0 | YNL142W | <i>MEP2</i>  | 1.0 | -1.9 | -1.4 | -1.4 | high affinity low capacity ammonia (by homology)                                  |
| CA4382 | orf19.5675  | <i>IPF8576</i>    | -1.1 | -1.1 | -1.1 | -1.1 | YOR191W | <i>RIS1</i>  | 1.0 | -1.5 | 1.0  | 1.2  | similar to <i>Saccharomyces cerevisiae</i> Ris1p DNA helicase (by homology)       |
| CA4383 | orf19.13121 | <i>IPF8573</i>    | -1.1 | 1.0  | 1.1  | 1.0  | YLR427W |              | 1.0 | -2.3 | -2.6 | -2.3 | unknown function                                                                  |
| CA4385 | orf19.3126  | <i>CCT6</i>       | -1.4 | -1.2 | -1.4 | -1.3 | YDR188W | <i>CCT6</i>  | 1.0 | -1.1 | 1.1  | 1.5  | component of chaperonin-containing T-complex (zeta subunit)(by homol              |
| CA4387 | orf19.3124  | <i>MAP1</i>       | 1.1  | -1.0 | -1.0 | -1.1 | YLR244C | <i>MAP1</i>  | 1.0 | -1.2 | 1.1  | 1.3  | methionine aminopeptidase, isoform 1 (by homology)                                |
| CA4388 |             | <i>IPF12416.3</i> | 1.0  | 1.0  | 1.0  | 1.0  | YLR245C | <i>CDD1</i>  | 1.0 | -2.7 | -7.4 | -3.2 | cytidine deaminase, 3-prime end (by homology)                                     |
| CA4389 | orf19.3123  | <i>RPT5</i>       | -1.0 | -1.0 | -1.1 | -1.1 | YOR117W | <i>RPT5</i>  | 1.0 | 1.1  | 1.5  | 1.7  | 26S proteasome regulatory subunit (by homology)                                   |
| CA4391 | orf19.3122  | <i>ARR3</i>       | 1.0  | 1.3  | 1.5  | 1.3  | YPR201W | <i>ARR3</i>  | 1.0 | -1.1 | -1.1 | -1.1 | involved in arsenite transport (by homology)                                      |
| CA4395 | orf19.3116  | <i>EXM2</i>       | -1.1 | 1.0  | 1.1  | 1.0  | YDL087C | <i>LUC7</i>  | 1.0 | 1.1  | 1.1  | 1.2  | EXit from Mitosis (by homology)                                                   |
| CA4397 | orf19.3114  | <i>IPF14369</i>   | -1.0 | 1.0  | 1.1  | 1.0  | YLR165C | <i>PUS5</i>  | 1.0 | -1.0 | -1.1 | -1.1 | unknown function                                                                  |
| CA4399 | orf19.3111  | <i>PRA1</i>       | 1.0  | -1.0 | 1.1  | -1.0 | YOL154W |              | 1.0 | -1.3 | -1.1 | -1.2 | pH-regulated antigen                                                              |
| CA4402 | orf19.3108  | <i>MGT1</i>       | 1.0  | 1.0  | 1.0  | -1.0 | YDL200C | <i>MGT1</i>  | 1.0 | -1.2 | -1.2 | -1.3 | O6-methylguanine DNA repair methyltransferase (by homology)                       |
| CA4404 | orf19.3106  | <i>MET16</i>      | 1.1  | -1.0 | -1.1 | 1.0  | YPR167C | <i>MET16</i> | 1.0 | 1.1  | 1.1  | 1.4  | 3'-phosphoadenylylsulfate reductase (by homology)                                 |
| CA4406 | orf19.3104  | <i>YDC1</i>       | 1.1  | 1.0  | 1.3  | 1.0  | YPL087W | <i>YDC1</i>  | 1.0 | 1.0  | 1.1  | -1.0 | alkaline dihydroceramidase (by homology)                                          |



|        |            |                   |      |      |      |      |         |               |     |      |      |      |                                                                                 |
|--------|------------|-------------------|------|------|------|------|---------|---------------|-----|------|------|------|---------------------------------------------------------------------------------|
| CA4407 | orf19.3103 | <i>RPO31</i>      | 1.1  | -1.1 | -1.2 | -1.0 | YOR116C | <i>RPO31</i>  | 1.0 | -1.3 | -1.1 | 1.1  | DNA-directed RNA polymerase III (by homology)                                   |
| CA4410 | orf19.3099 | <i>TRP4</i>       | -1.0 | -1.1 | 1.0  | 1.0  | YDR354W | <i>TRP4</i>   | 1.0 | 1.2  | 1.2  | 1.5  | Anthraniolate phosphoribosyltransferase                                         |
| CA4411 | orf19.3098 | <i>BRR2</i>       | -1.1 | -1.1 | -1.4 | -1.2 | YER172C | <i>BRR2</i>   | 1.0 | -1.2 | -1.2 | -1.1 | RNA helicase-related protein (by homology)                                      |
| CA4412 | orf19.3097 | <i>PDA1</i>       | 1.1  | -1.0 | -1.5 | -1.5 | YER178W | <i>PDA1</i>   | 1.0 | -1.1 | 1.1  | -1.2 | Pyruvate dehydrogenase alpha chain (by homology)                                |
| CA4413 | orf19.3093 | <i>MSH2</i>       | -1.0 | 1.0  | -1.1 | -1.1 | YOL090W | <i>MSH2</i>   | 1.0 | -1.2 | -1.2 | -1.0 | DNA mismatch repair protein (by homology)                                       |
| CA4416 | orf19.5180 | <i>IPF11888</i>   | 1.1  | 1.4  | 1.8  | 1.5  | YBL064C |               | 1.0 | -1.7 | -2.0 | -1.9 | unknown function                                                                |
| CA4418 | orf19.5178 | <i>ERG5</i>       | 1.1  | -1.3 | -1.2 | -1.1 | YMR015C | <i>ERG5</i>   | 1.0 | 1.5  | 1.8  | 1.2  | C-22 sterol desaturase by homology                                              |
| CA4420 | orf19.5175 | <i>SSM4</i>       | 1.1  | 1.2  | 1.3  | 1.3  | YIL030C | <i>SSM4</i>   | 1.0 | -1.2 | 1.0  | 1.1  | involved in mRNA turnover by homology                                           |
| CA4421 | orf19.5174 | <i>TAF19</i>      | -1.0 | 1.0  | 1.0  | -1.0 | YML098W | <i>TAF19</i>  | 1.0 | 1.0  | 1.1  | 1.0  | TBP-associated factor by homology                                               |
| CA4424 | orf19.5171 | <i>PMT1</i>       | 1.1  | 1.5  | 2.0  | 1.8  | YDL095W | <i>PMT1</i>   | 1.0 | -1.1 | 1.5  | 1.6  | mannosyltransferase                                                             |
| CA4427 | orf19.5168 | <i>IPF5584</i>    | 1.1  | 1.0  | 1.0  | -1.0 | YOL022C |               | 1.0 | 1.1  | 1.6  | 1.6  | unknown function                                                                |
| CA4428 | orf19.5167 | <i>IFM1</i>       | -1.2 | -1.3 | -1.6 | -1.4 | YOL023W | <i>IFM1</i>   | 1.0 | -1.1 | -1.2 | -1.3 | translation initiation factor 2 by homology                                     |
| CA4429 | orf19.5166 | <i>DBF4</i>       | 1.0  | -1.1 | -1.1 | -1.1 | YDR052C | <i>DBF4</i>   | 1.0 | -1.1 | 1.1  | 1.0  | regulatory subunit for Cdc7 by homology                                         |
| CA4430 | orf19.5165 | <i>IPF5577</i>    | -1.0 | 1.1  | 1.2  | 1.1  | YNR029C |               | 1.0 | -1.7 | 1.1  | 1.2  | unknown function                                                                |
| CA4431 | orf19.5164 | <i>ECM39</i>      | 1.2  | -1.0 | 1.1  | 1.0  | YNR030W | <i>ECM39</i>  | 1.0 | -1.1 | 1.0  | 1.1  | cell wall biogenesis by homology                                                |
| CA4432 | orf19.5163 | <i>IPF5574</i>    | -1.1 | -1.2 | -1.3 | -1.1 | YLL003W | <i>SFI1</i>   | 1.0 | -1.1 | -1.1 | -1.3 | unknown function                                                                |
| CA4433 | orf19.5162 | <i>BCK1</i>       | 1.0  | -1.2 | -1.3 | -1.2 | YJL095W | <i>BCK1</i>   | 1.0 | -1.1 | -1.5 | -1.5 | serine/threonine protein kinase of the MEKK family (by homology)                |
| CA4434 | orf19.5161 | <i>MRPL49</i>     | 1.5  | 1.1  | 1.4  | 1.2  | YJL096W | <i>MRPL49</i> | 1.0 | -1.3 | -1.4 | -1.5 | ribosomal protein mitochondrial                                                 |
| CA4435 | orf19.5160 | <i>SAP190</i>     | -1.3 | -1.0 | -1.3 | -1.1 | YKR028W | <i>SAP190</i> | 1.0 | 1.0  | 1.1  | 1.2  | phosphatase associated protein by homology                                      |
| CA4436 | orf19.5159 | <i>IPF13868</i>   | 1.2  | 1.9  | 2.5  | 1.6  | YNL191W |               | 1.0 | -1.0 | 1.0  | 1.2  | unknown function                                                                |
| CA4439 | orf19.5156 | <i>IPF13865</i>   | 1.3  | 1.1  | 1.3  | 1.2  | YJL097W |               | 1.0 | -1.1 | -1.1 | -1.0 | unknown function                                                                |
| CA4440 | orf19.5155 | <i>IPF13864</i>   | -1.0 | -1.0 | -1.0 | -1.0 | YJL099W | <i>CHS6</i>   | 1.0 | -1.2 | -1.1 | 1.0  | similar to <i>Saccharomyces cerevisiae</i> Chs6p chitin biosynthesis protein (b |
| CA4444 | orf19.6842 | <i>IPF3533</i>    | 1.0  | 1.1  | 1.2  | -1.0 | YLR425W | <i>TUS1</i>   | 1.0 | -1.9 | -1.8 | -1.9 | putative GDP/GTP exchange factor (by homology)                                  |
| CA4446 | orf19.6844 | <i>ICL1</i>       | -1.0 | -1.9 | -2.0 | -1.6 | YER065C | <i>ICL1</i>   | 1.0 | -4.4 | -5.3 | -4.8 | isocitrate lyase                                                                |
| CA4448 | orf19.6846 | <i>PHO85</i>      | 1.1  | 1.1  | 1.2  | 1.1  | YPL031C | <i>PHO85</i>  | 1.0 | -1.0 | 1.1  | -1.2 | Negative regulator of PHO system                                                |
| CA4449 | orf19.6847 | <i>IPF3520</i>    | -1.0 | -1.1 | -1.1 | -1.1 | YPL030W |               | 1.0 | -1.0 | -1.2 | 1.2  | unknown function                                                                |
| CA4450 | orf19.6848 | <i>IPF3518</i>    | -1.5 | -1.2 | -1.5 | -1.3 | YPL045W | <i>VPS16</i>  | 1.0 | -1.2 | -1.1 | -1.1 | similar to <i>Saccharomyces cerevisiae</i> Vps16p vacuolar sorting protein (b)  |
| CA4451 | orf19.6849 | <i>ELC1</i>       | 1.1  | -1.0 | 1.0  | 1.1  | YPL046C | <i>ELC1</i>   | 1.0 | -1.1 | 1.8  | 1.1  | Transcription elongation factor (by homology)                                   |
| CA4452 | orf19.6850 | <i>IPF3514</i>    | 1.0  | 1.1  | 1.0  | -1.1 | YDR255C |               | 1.0 | 1.1  | 1.2  | 1.2  | unknown function                                                                |
| CA4453 | orf19.6851 | <i>CHL4</i>       | 1.0  | 1.1  | 1.1  | 1.1  | YDR254W | <i>CHL4</i>   | 1.0 | -1.6 | -1.1 | -1.0 | chromosome segregation protein (by homology)                                    |
| CA4454 | orf19.6852 | <i>IPF15160</i>   | -1.0 | -1.0 | 1.0  | 1.0  | YEL072W |               | 1.0 | 1.1  | 1.8  | 2.4  | unknown function                                                                |
| CA4457 | orf19.6854 | <i>ATP1.EXON3</i> | -1.0 | -1.4 | -1.4 | -1.4 | YBL099W | <i>ATP1</i>   | 1.0 | -3.3 | -4.0 | -2.0 | F1F0-ATPase complex, F1 alpha subunit, exon 3                                   |
| CA4459 | orf19.6856 | <i>NSP49.3F</i>   | -1.2 | -1.2 | -1.3 | -1.3 | YGL092W | <i>NUP145</i> | 1.0 | -1.4 | -1.3 | -1.9 | nucleoporin, 3-prime end (by homology)                                          |
| CA4461 | orf19.6858 | <i>IPF8470</i>    | -1.1 | -1.1 | -1.3 | -1.2 | YEL015W |               | 1.0 | 1.4  | 1.3  | 1.7  | unknown function                                                                |
| CA4463 | orf19.6860 | <i>PIS1</i>       | 1.2  | -1.1 | -1.0 | -1.1 | YPR113W | <i>PIS1</i>   | 1.0 | 1.6  | 1.9  | 2.4  | CDP diacylglycerol--inositol 3-phosphatidyltransferase (by homology)            |
| CA4464 | orf19.6861 | <i>IPF9828</i>    | -1.0 | 1.0  | 1.0  | 1.0  | YOR249C | <i>APC5</i>   | 1.0 | 1.0  | 1.1  | -1.2 | similar to <i>Saccharomyces cerevisiae</i> Apc5p component of the anaphase-     |
| CA4465 | orf19.6862 | <i>IPF9829</i>    | 1.1  | 1.0  | 1.1  | 1.0  | YHR197W |               | 1.0 | -1.1 | 1.1  | 1.2  | unknown function                                                                |
| CA4466 | orf19.6863 | <i>VPH1</i>       | -1.1 | -1.0 | 1.3  | 1.2  | YOR270C | <i>VPH1</i>   | 1.0 | -1.1 | 1.3  | 1.4  | H+-ATPase V0 domain subunit (by homology)                                       |
| CA4469 | orf19.1903 | <i>TOR2.3F</i>    | 1.1  | 1.1  | -1.2 | -1.1 | YKL203C | <i>TOR2</i>   | 1.0 | -1.5 | -1.4 | -1.5 | phosphatidylinositol 3-kinase, 3-prime end (by homology)                        |
| CA4470 | orf19.1902 | <i>IPF9717</i>    | -1.1 | -1.1 | -1.2 | -1.1 | YPR144C |               | 1.0 | -1.2 | 1.1  | 1.1  | unknown function                                                                |
| CA4471 | orf19.1901 | <i>MCM3</i>       | -1.3 | -1.1 | -1.3 | -1.2 | YEL032W | <i>MCM3</i>   | 1.0 | -1.4 | -1.3 | -1.1 | replication initiation protein (by homology)                                    |
| CA4472 | orf19.1900 | <i>IPF6444</i>    | 1.1  | -1.1 | -1.1 | 1.0  | YPL157W |               | 1.0 | -1.1 | 1.1  | 1.1  | putative methyltransferase (by homology)                                        |
| CA4474 | orf19.1896 | <i>SSC1</i>       | 1.4  | -1.1 | -1.2 | -1.6 | YJR045C | <i>SSC1</i>   | 1.0 | -1.3 | -1.2 | -1.5 | Mitochondrial heat shock protein 70-related protein (by homology)               |
| CA4476 | orf19.1891 | <i>01-Apr</i>     | 1.1  | 1.3  | 1.6  | 1.4  | YPL154C | <i>PEP4</i>   | 1.0 | -1.3 | -1.5 | -2.1 | aspartyl protease                                                               |
| CA4477 | orf19.1890 | <i>IPF6459</i>    | -1.1 | 1.3  | 1.3  | 1.2  | YMR210W |               | 1.0 | -1.4 | -1.1 | -1.1 | unknown function                                                                |
| CA4478 | orf19.1889 | <i>IPF6461</i>    | 1.1  | 1.0  | -1.0 | 1.0  | YKR043C |               | 1.0 | -1.1 | 1.1  | 1.7  | unknown function                                                                |
| CA4479 | orf19.1888 | <i>URH1</i>       | 1.1  | -1.0 | -1.0 | -1.0 | YDR400W | <i>URH1</i>   | 1.0 | 1.1  | 1.2  | 1.3  | Uridine ribohydrolase (by homology)                                             |
| CA4480 | orf19.1887 | <i>IPF6464</i>    | 1.0  | 1.1  | 1.1  | 1.0  | YLL012W |               | 1.0 | -1.7 | -1.5 | -1.2 | putative triacylglycerol lipase (by homology)                                   |
| CA4481 | orf19.9441 | <i>IPF9150</i>    | -1.1 | -1.1 | -1.2 | -1.1 | YMR005W | <i>MPT1</i>   | 1.0 | 1.0  | 1.1  | 1.1  | similar to <i>Saccharomyces cerevisiae</i> Mpt1p required for protein synthesis |
| CA4482 | orf19.1883 | <i>IPF9154</i>    | -1.0 | 1.3  | 1.2  | 1.1  | YLR272C | <i>YCS4</i>   | 1.0 | -1.4 | 1.1  | 1.3  | similar to <i>Saccharomyces cerevisiae</i> Ycs4p subunit of condensin protein   |
| CA4483 | orf19.1881 | <i>IPF9156</i>    | -1.1 | -1.1 | 1.0  | 1.0  | YOR175C |               | 1.0 | 1.0  | -1.1 | -1.3 | unknown function                                                                |
| CA4484 | orf19.1880 | <i>HEM15</i>      | -1.1 | 1.4  | 1.4  | 1.4  | YOR176W | <i>HEM15</i>  | 1.0 | -1.1 | -1.1 | -1.4 | ferrochelatae precursor (by homology)                                           |
| CA4485 | orf19.1878 | <i>IPF9160</i>    | 1.0  | 1.1  | 1.2  | 1.1  | YOR174W | <i>MED4</i>   | 1.0 | -1.1 | -1.1 | -1.1 | similar to <i>Saccharomyces cerevisiae</i> Med4p transcription regulation medi  |
| CA4486 | orf19.1877 | <i>IPF9162</i>    | 2.3  | -1.1 | -1.1 | -1.0 | YLR271W |               | 1.0 | -1.7 | -1.6 | -1.4 | unknown function                                                                |
| CA4487 | orf19.1876 | <i>IPF4039</i>    | -1.0 | 1.0  | -1.1 | 1.0  | YHR086W | <i>NAM8</i>   | 1.0 | -1.1 | -1.3 | 1.0  | similar to <i>Saccharomyces cerevisiae</i> Nam8p recombination protein (by h    |
| CA4488 | orf19.1875 | <i>MEK1.3F</i>    | -1.0 | 1.0  | 1.0  | 1.0  | YOR351C | <i>MEK1</i>   | 1.0 | -1.1 | 1.2  | 1.2  | serine/threonine protein kinase, 3-prime end                                    |
| CA4491 | orf19.9427 | <i>SWR1</i>       | -1.1 | -1.1 | -1.6 | -1.2 | YDR334W | <i>SWR1</i>   | 1.0 | -1.5 | -1.4 | 1.0  | putative DNA helicase (by homology)                                             |
| CA4495 | orf19.1865 | <i>IPF4059</i>    | -1.4 | -1.5 | -1.5 | -1.4 | YHR039C | <i>MSC7</i>   | 1.0 | 1.0  | 1.1  | 1.1  | aldehyde dehydrogenase (by homology)                                            |
| CA4496 | orf19.9420 | <i>IPF4062</i>    | -1.4 | -1.1 | -1.2 | -1.1 | YDR333C |               | 1.0 | 1.3  | 1.2  | 1.2  | unknown function                                                                |
| CA4498 | orf19.8143 | <i>IPF11315</i>   | -1.1 | -1.1 | -1.3 | -1.1 | YNL132W | <i>KRE33</i>  | 1.0 | -1.0 | 1.7  | 2.0  | unknown function                                                                |
| CA4499 | orf19.511  | <i>IPF11316</i>   | -1.1 | -1.0 | 1.1  | 1.1  | YNL129W |               | 1.0 | -1.7 | -1.2 | 1.2  | unknown function                                                                |

|        |            |                   |      |      |      |      |         |               |     |      |      |      |                                                                            |
|--------|------------|-------------------|------|------|------|------|---------|---------------|-----|------|------|------|----------------------------------------------------------------------------|
| CA4501 | orf19.8138 | <i>QDR1</i>       | 1.0  | 8.1  | 13.2 | 7.0  | YIL120W | <i>QDR1</i>   | 1.0 | -1.1 | -1.3 | -1.3 | putative antibiotic resistance proteins (by homology)                      |
| CA4502 | orf19.8136 | <i>IPF10391</i>   | -1.0 | 1.1  | -1.0 | -1.0 | YNL064C | <i>YDJ1</i>   | 1.0 | 1.1  | 1.6  | 2.3  | Similar to dnaJ proteins                                                   |
| CA4503 | orf19.505  | <i>SRV2</i>       | -1.0 | -1.0 | 1.0  | 1.0  | YNL138W | <i>SRV2</i>   | 1.0 | -1.4 | -1.4 | -1.7 | adenylate cyclase-associated protein homolog                               |
| CA4504 | orf19.504  | <i>ARP5</i>       | -1.3 | -1.2 | -1.8 | -1.5 | YNL059C | <i>ARP5</i>   | 1.0 | -1.2 | 1.1  | -1.0 | actin-related protein (by homology)                                        |
| CA4505 | orf19.501  | <i>NOP2</i>       | -1.3 | -1.1 | -1.3 | -1.4 | YNL061W | <i>NOP2</i>   | 1.0 | 1.3  | 2.0  | 2.4  | nucleolar protein (by homology)                                            |
| CA4506 | orf19.500  | <i>GCD10</i>      | -1.0 | -1.1 | -1.2 | -1.1 | YNL062C | <i>GCD10</i>  | 1.0 | 1.2  | 1.8  | 1.6  | translation initiation factor eIF3 RNA-binding subunit (by homology)       |
| CA4507 | orf19.499  | <i>IPF20015</i>   | 1.1  | 1.0  | -1.0 | -1.1 | YNL063W |               | 1.0 | 1.1  | 1.1  | 1.1  | unknown function                                                           |
| CA4508 | orf19.498  | <i>NAM9</i>       | -1.1 | -1.1 | -1.2 | -1.1 | YNL137C | <i>NAM9</i>   | 1.0 | -1.3 | -1.2 | -1.4 | mitochondrial ribosomal protein                                            |
| CA4509 | orf19.497  | <i>IPF8973</i>    | 1.0  | -1.1 | -1.2 | -1.1 | YNL136W |               | 1.0 | 1.1  | 1.1  | 1.0  | unknown function                                                           |
| CA4510 | orf19.496  | <i>IPF8970</i>    | -1.1 | -1.1 | -1.1 | -1.1 | YHR120W | <i>MSH1</i>   | 1.0 | -1.2 | -1.2 | -1.1 | similar to Saccharomyces cerevisiae Msh1p DNA mismatch repair protein      |
| CA4511 | orf19.8124 | <i>IPF8966</i>    | -1.0 | 1.0  | -1.0 | -1.0 | YNL124W |               | 1.0 | -1.2 | -1.1 | 1.0  | unknown function                                                           |
| CA4512 | orf19.8123 | <i>RPL15B</i>     | 1.1  | -1.0 | -1.1 | 1.1  | YLR029C | <i>RPL15A</i> | 1.0 | 1.1  | 1.2  | 1.9  | ribosomal protein L15.e.c13 (by homology)                                  |
| CA4513 | orf19.492  | <i>ADE17</i>      | -1.3 | -1.7 | -1.8 | -1.6 | YMR120C | <i>ADE17</i>  |     |      |      |      | 5-aminoimidazole-4-carboxamide ribotide transformylase (by homology)       |
| CA4514 | orf19.491  | <i>IPF20016</i>   | -1.4 | 1.1  | 1.0  | 1.1  | YOR254C | <i>SEC63</i>  | 1.0 | -1.5 | -1.6 | -1.4 | similar to Saccharomyces cerevisiae Sec63p ER protein-translocation co     |
| CA4515 | orf19.490  | <i>IPF16652</i>   | 1.2  | 1.6  | 1.6  | 1.8  | YOR253W |               | 1.0 | 1.1  | -1.0 | 1.0  | unknown function                                                           |
| CA4516 | orf19.489  | <i>IPF18207</i>   | -1.1 | 2.1  | 2.0  | 2.3  | YPL170W |               | 1.0 | -1.6 | -1.6 | -1.5 | unknown function                                                           |
| CA4517 | orf19.488  | <i>MEX67</i>      | -1.2 | -1.1 | -1.3 | -1.1 | YPL169C | <i>MEX67</i>  | 1.0 | 1.1  | 1.5  | 1.9  | poly(A)+RNA binding protein involved in nuclear mRNA export (by homol      |
| CA4518 | orf19.487  | <i>SPT14</i>      | -1.1 | 1.0  | 1.0  | 1.0  | YPL175W | <i>SPT14</i>  | 1.0 | -1.5 | -1.4 | -1.0 | N-acetylglucosaminyl-phosphatidylinositol biosynthetic protein (by homol   |
| CA4519 | orf19.486  | <i>IPF7088</i>    | -1.0 | 1.1  | 1.1  | 1.0  | YPL174C | <i>NIP100</i> | 1.0 | -1.2 | -1.1 | -1.1 | similar to Saccharomyces cerevisiae Nip100p myosin-like protein, putativ   |
| CA4520 | orf19.485  | <i>CDC31</i>      | -1.0 | 1.0  | 1.0  | 1.0  | YOR257W | <i>CDC31</i>  | 1.0 | -1.3 | -1.4 | -1.5 | spindle pole body component, centrin (by homology)                         |
| CA4521 | orf19.484  | <i>MRPL40</i>     | -1.1 | -1.3 | -1.4 | -1.2 | YPL173W | <i>MRPL40</i> | 1.0 | 1.0  | -1.2 | -1.3 | Putative mitochondrial ribosomal protein (by homology)                     |
| CA4522 | orf19.482  | <i>RPT4</i>       | -1.0 | -1.1 | -1.1 | 1.0  | YOR259C | <i>RPT4</i>   | 1.0 | -1.0 | 1.4  | 1.4  | 26S proteasome regulatory subunit (by homology)                            |
| CA4523 | orf19.481  | <i>GCD1</i>       | -1.2 | -1.2 | -1.3 | -1.1 | YOR260W | <i>GCD1</i>   | 1.0 | -1.2 | 1.5  | 1.4  | translation initiation factor eIF2bgamma (by homology)                     |
| CA4524 | orf19.480  | <i>IPF7097</i>    | 1.1  | -1.1 | 1.0  | -1.1 | YJR056C |               | 1.0 | -2.1 | -1.9 | -1.9 | unknown function                                                           |
| CA4525 |            | <i>SEC22</i>      | 1.0  | 1.2  | 1.3  | 1.2  | YLR268W | <i>SEC22</i>  | 1.0 | -1.3 | -1.2 | -1.3 | synaptobrevin-type protein transport protein (by homology)                 |
| CA4526 | orf19.8109 | <i>MON1.3</i>     | -1.0 | 1.0  | 1.0  | 1.0  | YGL124C | <i>MON1</i>   | 1.0 | -1.0 | 1.2  | 1.0  | unknown function, 3-prime end                                              |
| CA4527 | orf19.9054 | <i>IPF4398</i>    | 1.2  | 1.3  | 1.5  | 1.2  | YGL023C | <i>PIB2</i>   | 1.0 | -1.4 | 1.2  | 1.4  | unknown function                                                           |
| CA4528 | orf19.1478 | <i>STT3</i>       | -1.2 | 1.2  | 1.4  | 1.3  | YGL022W | <i>STT3</i>   | 1.0 | 1.0  | 1.2  | 1.5  | oligosaccharyl transferase (by homology)                                   |
| CA4529 | orf19.1477 | <i>IPF4395</i>    | 1.3  | -1.2 | 1.1  | -1.1 | YGL010W |               | 1.0 | 1.1  | -1.2 | -1.1 | unknown function                                                           |
| CA4530 | orf19.1476 | <i>IME4</i>       | -1.0 | 1.0  | 1.0  | 1.0  | YGL192W | <i>IME4</i>   | 1.0 | 1.1  | 1.2  | -1.0 | positive transcription factor for IME2 (by homology)                       |
| CA4531 | orf19.1474 | <i>SLA1</i>       | 1.1  | 1.2  | 1.2  | -1.0 | YBL007C | <i>SLA1</i>   | 1.0 | -1.1 | -1.2 | -1.1 | cytoskeleton assembly control protein                                      |
| CA4533 | orf19.1471 | <i>COX4</i>       | 1.2  | 1.1  | 1.3  | 1.1  | YGL187C | <i>COX4</i>   | 1.0 | 1.1  | -1.0 | -1.9 | cytochrome-c oxidase (by homology)                                         |
| CA4534 | orf19.1470 | <i>RPS26A</i>     | 1.7  | 1.3  | 1.3  | 1.5  | YGL189C | <i>RPS26A</i> | 1.0 | 1.3  | 1.8  | 1.8  | ribosomal protein S26.e.A, cytosolic (by homology)                         |
| CA4535 | orf19.1468 | <i>CDC55</i>      | 1.0  | 1.1  | 1.1  | 1.1  | YGL190C | <i>CDC55</i>  | 1.0 | 1.1  | -1.2 | -1.3 | B subunit of protein phosphatase 2A (by homology)                          |
| CA4536 | orf19.1467 | <i>COX13</i>      | 1.2  | -1.0 | 1.1  | 1.2  | YGL191W | <i>COX13</i>  | 1.0 | -1.2 | -1.5 | -2.4 | cytochrome-c oxidase chain VIa (by homology)                               |
| CA4537 | orf19.1466 | <i>YNT2</i>       | 1.1  | -1.1 | 1.0  | -1.0 | YLR059C | <i>REX2</i>   | 1.0 | -1.6 | -1.9 | -1.7 | suppressor of rna12/yme2 (by homology)                                     |
| CA4540 | orf19.1462 | <i>SMP2</i>       | -1.1 | -1.0 | -1.1 | 1.0  | YMR165C | <i>SMP2</i>   | 1.0 | 1.1  | -1.1 | -1.2 | Involved in plasmid maintenance, respiration and cell proliferation (by hc |
| CA4542 | orf19.1460 | <i>IPF6255</i>    | -1.3 | -1.4 | -1.5 | -1.4 | YHR074W | <i>QNS1</i>   | 1.0 | 1.1  | 1.5  | 1.1  | unknown function                                                           |
| CA4543 | orf19.1459 | <i>PPE1</i>       | -1.0 | 1.0  | 1.1  | 1.0  | YHR075C | <i>PPE1</i>   | 1.0 | -1.3 | -1.2 | -1.2 | Ribosomal protein of the small subunit, mitochondrial (by homology)        |
| CA4544 | orf19.1458 | <i>IPF6252</i>    | -1.0 | -1.0 | 1.1  | 1.0  | YJL035C | <i>TAD2</i>   | 1.0 | -2.2 | -2.2 | -2.6 | similar to Saccharomyces cerevisiae Tad2p tRNA-specific adenosine dex      |
| CA4545 | orf19.1457 | <i>SSL1</i>       | -1.0 | -1.0 | 1.1  | 1.1  | YLR005W | <i>SSL1</i>   | 1.0 | 1.1  | -1.0 | 1.4  | TFIIH subunit (transcription initiation factor), factor B                  |
| CA4546 | orf19.1453 | <i>SPT5</i>       | 1.1  | 1.0  | -1.0 | -1.1 | YML010W | <i>SPT5</i>   | 1.0 | 1.1  | 1.5  | 1.6  | Transcription elongation protein                                           |
| CA4547 | orf19.1451 | <i>SRB9</i>       | -1.0 | 1.0  | 1.0  | -1.1 | YDR443C | <i>SSN2</i>   | 1.0 | 1.1  | 1.2  | 1.1  | DNA-directed RNA polymerase II holoenzyme and Srb10 CDK subcompl           |
| CA4549 | orf19.1449 | <i>IPF7863</i>    | 1.0  | -1.2 | -1.2 | -1.2 | YNL335W |               | 1.0 | 1.4  | 1.3  | 1.1  | unknown function                                                           |
| CA4550 |            | <i>DYN2.3</i>     | 1.1  | -1.0 | 1.1  | -1.0 | YDR424C | <i>DYN2</i>   | 1.0 | 1.1  | 1.0  | -1.1 | Dynein light chain 1, cytosolic, 3-prime end                               |
| CA4551 | orf19.1448 | <i>APT1</i>       | 1.5  | 1.8  | 1.8  | 1.8  | YML022W | <i>APT1</i>   | 1.0 | 1.1  | 1.6  | 1.9  | adenine phosphoribosyltransferase                                          |
| CA4553 | orf19.1446 | <i>CYB1</i>       | -1.1 | 1.1  | -1.0 | 1.0  | YPR119W | <i>CLB2</i>   | 1.0 | -1.1 | -1.1 | 1.2  | G2/Mitotic-specific cyclin                                                 |
| CA4554 | orf19.1445 | <i>IPF7874</i>    | 1.0  | 1.0  | -1.0 | -1.2 | YHR154W | <i>ESC4</i>   | 1.0 | -1.0 | 1.4  | 1.0  | similar to Saccharomyces cerevisiae Esc4p involved in chromatin silenc     |
| CA4555 | orf19.9019 | <i>IPF17555.3</i> | -1.0 | 1.1  | 1.0  | 1.1  | YLR206W | <i>ENT2</i>   | 1.0 | -1.4 | -1.2 | -1.6 | unknown function, 3-prime end                                              |
| CA4556 | orf19.6866 | <i>IPF8044</i>    | -1.0 | -1.0 | -1.1 | -1.0 | YIL061C | <i>SNP1</i>   | 1.0 | -1.3 | 1.0  | 1.2  | similar to Saccharomyces cerevisiae Snp1p U1 small nuclear ribonucleo      |
| CA4560 | orf19.6871 | <i>IPF8038</i>    | -1.1 | 1.1  | -1.0 | -1.0 | YMR124W |               | 1.0 | 1.1  | 1.3  | 1.2  | unknown function                                                           |
| CA4561 | orf19.6872 | <i>IPF8031</i>    | 1.0  | 1.5  | 1.5  | 1.1  | YLR126C |               | 1.0 | -1.2 | -1.1 | -1.1 | unknown function                                                           |
| CA4562 | orf19.6873 | <i>RPS8A</i>      | 1.1  | -1.0 | -1.1 | -1.0 | YER102W | <i>RPS8B</i>  | 1.0 | 2.4  | 3.4  | 5.0  | ribosomal protein (by homology)                                            |
| CA4565 | orf19.6875 | <i>VPS35</i>      | 1.1  | 1.0  | -1.0 | 1.1  | YJL154C | <i>VPS35</i>  | 1.0 | -1.1 | -1.1 | -1.1 | Protein-sorting protein, vacuolar (by homology)                            |
| CA4567 | orf19.6879 | <i>IPF9555</i>    | 1.0  | 1.2  | 1.1  | 1.1  | YAR008W | <i>SEN34</i>  | 1.0 | 1.1  | 1.2  | 1.2  | unknown function                                                           |
| CA4568 | orf19.6880 | <i>IPF9554</i>    | -1.1 | 1.1  | -1.1 | 1.0  | YPR105C | <i>COD1</i>   | 1.0 | -1.1 | -1.1 | -1.0 | unknown function                                                           |
| CA4569 | orf19.6881 | <i>IPF9552</i>    | 1.1  | 3.1  | 3.4  | 2.8  | YPR107C | <i>YTH1</i>   | 1.0 | -1.2 | -1.1 | -1.2 | unknown function                                                           |
| CA4570 | orf19.6882 | <i>IPF9550</i>    | -1.1 | 8.4  | 7.2  | 7.3  | YJR051W | <i>OSM1</i>   | 1.0 | -3.4 | -1.7 | -1.4 | similar to Saccharomyces cerevisiae Osm1p osmotic growth protein           |
| CA4571 |            | <i>RPL33.3</i>    | 1.5  | 1.2  | 1.3  | 1.7  | YPL143W | <i>RPL33A</i> | 1.0 | 1.0  | 1.7  | 2.1  | ribosomal protein L35a, 3-prime end                                        |
| CA4572 | orf19.6883 | <i>KES1</i>       | -1.3 | -1.2 | -1.5 | -1.3 | YPL145C | <i>KES1</i>   | 1.0 | 1.2  | 1.8  | 1.7  | involved in ergosterol biosynthesis (by homology)                          |
| CA4573 | orf19.6884 | <i>IPF9431</i>    | 1.0  | 1.1  | 1.2  | 1.0  | YJL091C |               | 1.0 | -1.6 | -2.0 | -1.9 | unknown function                                                           |

|        |             |                   |      |      |      |      |         |              |     |      |      |      |                                                                                 |
|--------|-------------|-------------------|------|------|------|------|---------|--------------|-----|------|------|------|---------------------------------------------------------------------------------|
| CA4574 | orf19.6885  | <i>IPF9430</i>    | -1.1 | -1.3 | -1.2 | -1.1 | YAL009W | <i>SPO7</i>  | 1.0 | -1.5 | -1.5 | -1.2 | similar to <i>Saccharomyces cerevisiae</i> Spo7p meiotic protein (by homology)  |
| CA4575 | orf19.6886  | <i>IPF9428</i>    | -1.0 | -1.2 | -1.1 | -1.1 | YPL146C |              | 1.0 | 1.0  | 1.6  | 1.6  | unknown function                                                                |
| CA4577 | orf19.6889  | <i>MKK2</i>       | -1.3 | 1.2  | 1.3  | 1.3  | YPL140C | <i>MKK2</i>  | 1.0 | 1.0  | -1.0 | -1.1 | Protein kinase of MEK (by homology)                                             |
| CA4578 | orf19.6891  | <i>RFC1</i>       | -1.0 | -1.1 | -1.3 | -1.2 | YOR217W | <i>RFC1</i>  | 1.0 | -1.4 | -1.1 | -1.3 | DNA replication factor C (by homology)                                          |
| CA4582 | orf19.6900  | <i>MDM12</i>      | -1.1 | -1.0 | -1.1 | -1.1 | YOL009C | <i>MDM12</i> | 1.0 | -1.1 | 1.0  | -1.1 | Involved in mitochondrial inheritance (by homology)                             |
| CA4583 | orf19.6901  | <i>IPF2229</i>    | -1.1 | -1.1 | -1.0 | -1.0 | YOR173W |              | 1.0 | -1.3 | -1.3 | 1.1  | unknown function                                                                |
| CA4584 | orf19.6902  | <i>IPF2228</i>    | -1.1 | -1.2 | -1.2 | -1.0 | YKR024C | <i>DBP7</i>  | 1.0 | -1.9 | -1.5 | -1.3 | similar to <i>Saccharomyces cerevisiae</i> Dbp7p RNA helicase required for 6t   |
| CA4585 | orf19.6903  | <i>IPF2227</i>    | -1.1 | -1.1 | -1.1 | -1.0 | YKR025W | <i>RPC37</i> | 1.0 | -2.2 | -1.2 | -1.2 | unknown function                                                                |
| CA4586 | orf19.6904  | <i>GCN3</i>       | 1.0  | 1.0  | 1.1  | 1.0  | YKR026C | <i>GCN3</i>  | 1.0 | -2.1 | -1.8 | -1.5 | Translation initiation factor eIF2B alpha subunit (by homology)                 |
| CA4587 | orf19.6905  | <i>IPF2223</i>    | -1.3 | 1.5  | 1.4  | 1.4  | YNL011C |              | 1.0 | -1.4 | -1.4 | -1.5 | unknown function                                                                |
| CA4588 | orf19.6906  | <i>3EL1.EXON1</i> | 1.3  | 1.0  | 1.1  | 1.0  | YMR116C | <i>ASC1</i>  |     |      |      |      | protein of the 40S ribosomal subunit, exon 1 (by homology)                      |
| CA4590 | orf19.6907  | <i>IPF2218</i>    | 1.1  | -1.1 | 1.0  | -1.1 | YDL156W |              | 1.0 | 1.1  | 1.2  | 1.1  | unknown function                                                                |
| CA4591 | orf19.6908  | <i>IPF2216</i>    | -1.0 | -1.0 | -1.0 | 1.0  | YMR113W | <i>FOL3</i>  | 1.0 | -1.4 | 2.2  | 1.4  | putative polyglutamate synthetase (by homology)                                 |
| CA4592 | orf19.6909  | <i>IPF2215</i>    | 1.1  | 1.0  | -1.0 | 1.0  | YMR112C | <i>MED11</i> | 1.0 | -1.1 | -1.0 | 1.5  | unknown function                                                                |
| CA4593 | orf19.6910  | <i>IPF2214</i>    | 1.0  | -1.0 | 1.0  | -1.0 | YDR013W |              | 1.0 | -1.0 | 1.2  | 1.6  | unknown function                                                                |
| CA4595 | orf19.6913  | <i>GCN2</i>       | -1.2 | -1.1 | -1.1 | -1.1 | YDR283C | <i>GCN2</i>  | 1.0 | -1.5 | -1.8 | -1.5 | Ser/thr protein kinase (by homology)                                            |
| CA4596 | orf19.6915  | <i>MRE11</i>      | 1.0  | -1.0 | -1.0 | -1.0 | YMR224C | <i>MRE11</i> | 1.0 | -1.0 | -1.1 | -1.1 | DNA repair and meiotic recombination protein (by homology)                      |
| CA4597 | orf19.6916  | <i>ATP11</i>      | 1.0  | -1.0 | -1.0 | 1.0  | YNL315C | <i>ATP11</i> | 1.0 | -1.1 | -1.2 | -1.4 | F1F0-ATPase complex assembly protein (by homology)                              |
| CA4598 | orf19.6917  | <i>IPF20019</i>   | 1.0  | 1.1  | -1.0 | 1.0  | YNL310C |              | 1.0 | -1.2 | -1.3 | -1.3 | unknown function                                                                |
| CA4602 | orf19.10802 | <i>IPF6231</i>    | 1.1  | 1.1  | 1.1  | 1.2  | YCL033C |              | 1.0 | -1.0 | -1.4 | -1.4 | unknown function                                                                |
| CA4603 | orf19.10803 | <i>IPF6230</i>    | 1.6  | 1.1  | 1.6  | 1.3  | YDL015C | <i>TSC13</i> | 1.0 | 1.4  | 1.7  | 1.5  | unknown function                                                                |
| CA4607 | orf19.3297  | <i>IPF6223</i>    | 1.1  | -1.0 | 1.1  | 1.0  | YGR215W | <i>RSM27</i> | 1.0 | -1.4 | -1.3 | -1.2 | unknown function                                                                |
| CA4608 | orf19.3298  | <i>CCH1</i>       | -1.2 | 1.1  | 1.3  | 1.1  | YGR217W | <i>CCH1</i>  | 1.0 | -1.5 | -1.3 | -1.0 | Calcium channel protein (by homology)                                           |
| CA4609 | orf19.3300  | <i>ZPR1</i>       | 1.0  | 1.0  | -1.1 | -1.0 | YGR211W | <i>ZPR1</i>  | 1.0 | -1.2 | 1.2  | 1.4  | Zinc finger protein (by homology)                                               |
| CA4610 | orf19.3301  | <i>IPF19802</i>   | 1.1  | 1.3  | 1.4  | 1.3  | YIL046W | <i>MET30</i> | 1.0 | -1.3 | -1.3 | -1.2 | similar to <i>Saccharomyces cerevisiae</i> Met30p involved in regulation of sul |
| CA4612 | orf19.3303  | <i>PPM2</i>       | -1.1 | -1.1 | -1.1 | 1.0  | YOL141W | <i>PPM2</i>  | 1.0 | -1.5 | 1.2  | 1.4  | carboxy methyl transferase                                                      |
| CA4613 | orf19.3304  | <i>IPF7950</i>    | 1.0  | -1.1 | -1.1 | -1.1 | YOL142W | <i>RRP40</i> | 1.0 | 1.4  | 1.6  | 1.9  | similar to <i>Saccharomyces cerevisiae</i> Rrp40p involved in ribosomal RNA 1   |
| CA4615 | orf19.3306  | <i>IPF7955</i>    | 1.0  | 1.0  | 1.0  | -1.0 | YIL072W | <i>HOP1</i>  | 1.0 | -1.1 | -1.1 | -1.1 | DNA binding protein (by homology)                                               |
| CA4616 | orf19.3307  | <i>IPF5761</i>    | 1.0  | 1.1  | 1.2  | 1.1  | YHR176W |              | 1.0 | -1.0 | -1.2 | -1.1 | flavin-containing monooxygenase (by homology)                                   |
| CA4617 | orf19.3308  | <i>STB5</i>       | 1.1  | 1.2  | 1.5  | 1.3  | YHR178W | <i>STB5</i>  | 1.0 | 1.2  | -1.0 | 1.0  | SIN3 binding protein (by homology)                                              |
| CA4621 | orf19.3312  | <i>IPF5753</i>    | -1.0 | 1.2  | 1.5  | 1.2  | YER080W |              | 1.0 | -1.3 | -1.1 | -1.8 | unknown function                                                                |
| CA4622 | orf19.3314  | <i>IPF5751</i>    | -1.2 | 1.1  | 1.0  | 1.0  | YBR254C | <i>TRS20</i> | 1.0 | 1.1  | 1.1  | 1.1  | TRAPP subunit of 20 kDa involved in targeting and fusion of ER to golgi 1       |
| CA4624 | orf19.3318  | <i>IPF5747</i>    | -1.1 | 1.0  | -1.0 | -1.0 | YBR255W |              | 1.0 | 1.1  | 1.0  | 1.1  | unknown function                                                                |
| CA4626 | orf19.10831 | <i>MRS7</i>       | -1.1 | -1.1 | -1.2 | -1.0 | YOL027C |              | 1.0 | -1.3 | -1.3 | -1.3 | suppressor splicing defects (by homology)                                       |
| CA4627 | orf19.10832 | <i>DUT1</i>       | 1.2  | 1.0  | 1.0  | 1.1  | YBR252W | <i>DUT1</i>  | 1.0 | -1.1 | -1.1 | -1.0 | dUTP pyrophosphatase                                                            |
| CA4630 | orf19.336   | <i>IPF1537</i>    | 1.0  | 1.1  | 1.1  | 1.1  | YPL252C | <i>YAH1</i>  | 1.0 | 1.0  | -1.1 | 1.1  | putative adrenodoxin and ferredoxin (by homology)                               |
| CA4631 | orf19.337   | <i>VTI1</i>       | -1.0 | 1.2  | 1.2  | 1.1  | YMR197C | <i>VTI1</i>  | 1.0 | -1.0 | 1.2  | 1.2  | v-SNARE involved in Golgi retrograde traffic (by homology)                      |
| CA4632 | orf19.338   | <i>IPF1531</i>    | -1.2 | -1.3 | -1.8 | -1.4 | YMR196W |              | 1.0 | -1.1 | -1.3 | -1.3 | unknown function                                                                |
| CA4633 | orf19.339   | <i>NDH1</i>       | -1.2 | 3.1  | 3.7  | 2.9  | YMR145C |              | 1.0 | -1.0 | 1.2  | -1.0 | Mitochondrial NADH dehydrogenase                                                |
| CA4634 | orf19.340   | <i>IPF1526</i>    | -1.0 | 1.0  | -1.0 | 1.0  | YLR119W | <i>SRN2</i>  | 1.0 | -1.2 | -1.1 | -1.3 | unknown function                                                                |
| CA4638 | orf19.345   | <i>UGA2</i>       | -1.1 | -1.6 | -2.7 | -1.8 | YBR006W | <i>UGA2</i>  | 1.0 | 1.3  | -1.1 | 1.1  | succinate-semialdehyde dehydrogenase (NAD(P)+) (by homology)                    |
| CA4639 | orf19.346   | <i>IPF1509</i>    | -1.1 | -1.7 | -1.9 | -1.6 | YLR089C |              | 1.0 | -1.1 | 1.2  | 1.3  | putative alanine transaminase (by homology)                                     |
| CA4642 | orf19.349   | <i>IPF1500</i>    | -1.1 | -1.0 | 1.0  | 1.0  | YPR155C | <i>NCA2</i>  | 1.0 | 1.1  | 1.1  | -1.2 | similar to <i>Saccharomyces cerevisiae</i> Nca2p regulating expression of mit   |
| CA4643 | orf19.350   | <i>PRE9</i>       | -1.0 | 1.0  | 1.0  | 1.1  | YGR135W | <i>PRE9</i>  | 1.0 | -1.0 | -1.1 | 1.2  | 20S proteasome subunit Y13 (alpha3) (by homology)                               |
| CA4644 | orf19.351   | <i>IPF1497</i>    | -1.0 | 1.0  | -1.0 | 1.0  | YPR153W |              | 1.0 | -1.3 | -1.1 | -1.1 | unknown function                                                                |
| CA4647 | orf19.354   | <i>IPF1493</i>    | -1.0 | -1.0 | 1.0  | 1.0  | YER078C |              | 1.0 | 1.1  | 1.1  | 1.3  | similarity to <i>E.coli</i> X-Pro aminopeptidase II (by homology)               |
| CA4648 | orf19.11914 | <i>IPF9864</i>    | -1.3 | -1.0 | -1.1 | -1.1 | YBL034C | <i>STU1</i>  | 1.0 | -1.3 | -1.2 | 1.1  | similar to <i>Saccharomyces cerevisiae</i> Stu1p mitotic spindle protein (by ho |
| CA4650 | orf19.11916 | <i>ISW1.3</i>     | -1.3 | -1.4 | -1.9 | -1.4 | YBR245C | <i>ISW1</i>  | 1.0 | -1.6 | -1.4 | -1.4 | ATPase component of a four subunit chromatin remodeling complex, 3-p            |
| CA4651 | orf19.11918 | <i>IPF3121</i>    | -1.0 | 1.0  | 1.1  | -1.0 | YGR044C | <i>RME1</i>  | 1.0 | 1.2  | 1.5  | 2.2  | unknown function                                                                |
| CA4653 | orf19.4440  | <i>IPF3102</i>    | 1.2  | 1.1  | 1.1  | 1.0  | YER157W | <i>SEC34</i> | 1.0 | 1.1  | 1.2  | 1.1  | similar to <i>Saccharomyces cerevisiae</i> Sec34p required for vesicle tetherin |
| CA4654 | orf19.4441  | <i>IPF3101</i>    | -1.0 | -1.0 | -1.0 | 1.1  | YIL150C | <i>DNA43</i> | 1.0 | -1.3 | 1.3  | 1.1  | unknown function                                                                |
| CA4655 | orf19.4442  | <i>IPF3098</i>    | 1.1  | 1.0  | 1.5  | 1.1  | YNL219C | <i>ALG9</i>  | 1.0 | 1.1  | 1.2  | 1.1  | Putative mannosyltransferase (by homology)                                      |
| CA4656 | orf19.4443  | <i>IPF3095</i>    | -1.1 | -1.1 | -1.0 | -1.0 | YDL235C | <i>YPD1</i>  | 1.0 | -1.1 | -1.1 | -1.1 | unknown function                                                                |
| CA4657 | orf19.4444  | <i>IPF3094</i>    | 1.1  | 2.2  | 2.6  | 2.1  | YDL236W | <i>PHO13</i> | 1.0 | 1.2  | 1.4  | 1.5  | 4-nitrophenyl phosphatase (by homology)                                         |
| CA4660 | orf19.4447  | <i>YMC1</i>       | 1.0  | -1.1 | -1.1 | -1.0 | YPR058W | <i>YMC1</i>  | 1.0 | 1.0  | 1.1  | 1.3  | mitochondrial carrier protein (MCF) (by homology)                               |
| CA4661 | orf19.4448  | <i>IPF6561</i>    | -1.1 | -1.1 | -1.0 | -1.1 | YOR353C |              | 1.0 | 1.1  | 1.4  | 1.2  | unknown function                                                                |
| CA4662 | orf19.4449  | <i>LYS7</i>       | -1.0 | -1.0 | -1.0 | -1.0 | YMR038C | <i>LYS7</i>  | 1.0 | 1.3  | 1.7  | 2.0  | Copper chaperone for superoxide dismutase Sod1p (by homology)                   |
| CA4663 | orf19.4450  | <i>IPF6554</i>    | -1.2 | -1.9 | -2.1 | -1.9 | YJL103C |              | 1.0 | -1.1 | -1.0 | -1.1 | unknown function                                                                |
| CA4665 | orf19.4451  | <i>IPF6548</i>    | -1.3 | -1.2 | -1.6 | -1.4 | YNL163C | <i>RIA1</i>  | 1.0 | 1.1  | -1.3 | 1.3  | translation elongation factor eEF4 (by homology)                                |
| CA4666 | orf19.4455  | <i>IPF6542</i>    | -1.1 | -1.3 | -1.2 | -1.2 | YNL164C |              | 1.0 | -1.3 | -1.3 | -1.2 | unknown function                                                                |
| CA4668 | orf19.906   | <i>ROM2</i>       | -1.0 | 1.0  | 1.2  | -1.0 | YLR371W | <i>ROM2</i>  | 1.0 | -1.3 | -1.2 | 1.0  | GDP/GTP exchange factor for Rho1p (by homology)                                 |

|        |             |                 |      |      |      |      |         |               |     |      |      |      |                                                                              |
|--------|-------------|-----------------|------|------|------|------|---------|---------------|-----|------|------|------|------------------------------------------------------------------------------|
| CA4669 | orf19.905   | <i>IPF4537</i>  | 1.2  | 1.3  | 1.7  | 1.3  | YIL088C |               | 1.0 | -1.2 | -1.2 | -1.5 | putative permease (by homology)                                              |
| CA4671 | orf19.903   | <i>GPM1</i>     | -1.1 | 2.2  | 1.9  | 2.2  | YKL152C | <i>GPM1</i>   | 1.0 | 1.5  | 1.8  | 2.1  | phosphoglycerate mutase (by homology)                                        |
| CA4672 | orf19.900   | <i>IPF3659</i>  | -1.6 | -1.5 | -2.1 | -2.0 | YJL041W | <i>NSP1</i>   | 1.0 | -1.1 | 1.0  | 1.1  | similar to Saccharomyces cerevisiae Nsp1p nuclear pore protein (by homology) |
| CA4674 | orf19.898   | <i>HEM2</i>     | 1.1  | -1.1 | 1.0  | -1.0 | YGL040C | <i>HEM2</i>   | 1.0 | 1.0  | 1.0  | -1.3 | Porphobilinogen synthase (by homology)                                       |
| CA4675 | orf19.897   | <i>IPF3664</i>  | 1.1  | 1.0  | 1.1  | 1.0  | YMR077C | <i>VPS20</i>  | 1.0 | -1.0 | -1.2 | -1.3 | unknown function                                                             |
| CA4677 | orf19.895   | <i>HOG1</i>     | 1.1  | 1.0  | -1.0 | -1.1 | YLR113W | <i>HOG1</i>   | 1.0 | 1.3  | 1.7  | 1.6  | Ser/thr protein kinase of MAPK family                                        |
| CA4678 | orf19.894   | <i>IPF3670</i>  | -1.2 | 1.0  | 1.0  | 1.1  | YDR137W | <i>RGP1</i>   | 1.0 | -1.2 | 1.2  | 1.0  | unknown function                                                             |
| CA4680 | orf19.891   | <i>AMD1</i>     | -1.3 | 1.1  | -1.1 | 1.0  | YML035C | <i>AMD1</i>   | 1.0 | -2.0 | -2.1 | -2.1 | AMP deaminase (by homology)                                                  |
| CA4681 | orf19.889   | <i>IPF3679</i>  | -1.1 | -1.1 | -1.2 | -1.0 | YOL055C | <i>THI20</i>  | 1.0 | -3.0 | -2.0 | -2.5 | similar to Saccharomyces cerevisiae Thi20p hydroxymethylpyrimidine ph        |
| CA4682 | orf19.886   | <i>IPF3687</i>  | 1.0  | 1.1  | -1.2 | -1.0 | YIR006C | <i>PAN1</i>   | 1.0 | -1.8 | -2.0 | -2.0 | similar to Saccharomyces cerevisiae Pan1p actin-cytoskeleton assembly        |
| CA4685 | orf19.881   | <i>IPF9013</i>  | -1.2 | 1.1  | -1.1 | -1.0 | YOR030W | <i>DFG16</i>  | 1.0 | -1.8 | -1.7 | -1.7 | unknown function                                                             |
| CA4686 | orf19.880   | <i>IPF9015</i>  | -1.0 | 1.1  | 1.1  | 1.1  | YHR098C | <i>SFB3</i>   | 1.0 | -1.7 | -1.9 | -1.7 | unknown function                                                             |
| CA4687 | orf19.879   | <i>IPF9017</i>  | -1.0 | -1.0 | 1.0  | 1.0  | YOR035C | <i>SHE4</i>   | 1.0 | 1.1  | 1.2  | 1.1  | similar to Saccharomyces cerevisiae She4p required for mother cell-spec      |
| CA4688 | orf19.878   | <i>NBN1</i>     | 1.0  | -1.0 | 1.0  | 1.0  | YHR090C | <i>YNG2</i>   | 1.0 | 1.5  | 1.0  | 1.1  | involved in chromatin remodeling and possibly transcription regulation (b)   |
| CA4692 |             | <i>COX6.3</i>   | 1.0  | -1.0 | 1.0  | -1.0 | YHR051W | <i>COX6</i>   | 1.0 | 1.2  | 1.1  | -1.3 | cytochrome-c oxidase subunit VI, 3-prime end (by homology)                   |
| CA4695 | orf19.6923  | <i>IPF4229</i>  | -1.1 | -1.0 | 1.1  | 1.0  | YML015C | <i>TAF40</i>  | 1.0 | -1.5 | -2.0 | -1.9 | unknown function                                                             |
| CA4696 | orf19.6924  | <i>HTA1</i>     | 1.5  | 1.7  | 1.6  | 1.9  | YDR225W | <i>HTA1</i>   | 1.0 | 1.1  | 1.3  | -1.1 | Histone H2A (by homology)                                                    |
| CA4697 | orf19.6925  | <i>HTB1</i>     | 1.1  | 1.3  | 1.5  | 1.3  | YDR224C | <i>HTB1</i>   | 1.0 | -1.3 | 1.3  | 1.1  | Histone H2B (by homology)                                                    |
| CA4698 | orf19.6926  | <i>CDC25</i>    | 1.1  | 1.0  | 1.2  | 1.1  | YLR310C | <i>CDC25</i>  | 1.0 | -1.1 | 1.1  | 1.1  | cell division cycle protein                                                  |
| CA4699 | orf19.6927  | <i>IPF4220</i>  | 1.1  | -1.0 | 1.0  | -1.1 | YJL053W | <i>PEP8</i>   | 1.0 | -1.1 | -1.1 | -1.1 | similar to Saccharomyces cerevisiae Pep8p involved in vacuolar protein :     |
| CA4700 | orf19.6928  | <i>SAP9</i>     | -1.0 | 1.6  | 2.2  | 1.3  | YLR120C | <i>YPS1</i>   | 1.0 | -3.2 | -3.6 | -4.6 | aspartyl proteinase 9 (by homology)                                          |
| CA4701 | orf19.6929  | <i>IPF4214</i>  | 1.0  | 1.0  | 1.1  | 1.0  | YER134C |               | 1.0 | 1.1  | 1.1  | -1.5 | unknown function                                                             |
| CA4703 | orf19.6931  | <i>CLP1</i>     | -1.1 | -1.1 | 1.0  | 1.1  | YOR250C | <i>CLP1</i>   | 1.0 | -1.0 | 1.1  | 1.0  | probable cleavage/polyadenylation factor                                     |
| CA4704 | orf19.6933  | <i>RRD2</i>     | -1.0 | 1.0  | 1.1  | 1.0  | YPL152W | <i>RRD2</i>   | 1.0 | -1.1 | -1.1 | -1.3 | phosphotyrosyl phosphatase activator                                         |
| CA4706 | orf19.6936  | <i>RAD53</i>    | 1.0  | 1.0  | 1.0  | 1.1  | YPL153C | <i>RAD53</i>  | 1.0 | -1.2 | -1.4 | -1.6 | protein kinase                                                               |
| CA4707 | orf19.6937  | <i>PTR21</i>    | -1.0 | 2.6  | 3.4  | 3.2  | YKR093W | <i>PTR2</i>   | 1.0 | -1.9 | -2.0 | -1.5 | peptide transporter                                                          |
| CA4708 | orf19.6938  | <i>MEU1</i>     | -1.0 | 1.1  | 1.1  | -1.0 | YLR017W | <i>MEU1</i>   | 1.0 | 1.1  | 1.4  | 1.6  | regulator of ADH2 expression (by homology)                                   |
| CA4709 | orf19.6941  | <i>IPF5895</i>  | 1.0  | 1.0  | 1.0  | -1.1 | YOR245C | <i>DGA1</i>   | 1.0 | -1.4 | -1.4 | -1.4 | unknown function                                                             |
| CA4710 | orf19.6942  | <i>ORC3</i>     | -1.1 | -1.1 | -1.2 | -1.1 | YLL004W | <i>ORC3</i>   | 1.0 | 1.0  | -1.2 | -1.3 | Origin recognition complex (by homology)                                     |
| CA4711 | orf19.6944  | <i>PHB1</i>     | -1.0 | -1.3 | -1.3 | -1.3 | YGR132C | <i>PHB1</i>   | 1.0 | -1.4 | -1.1 | -1.1 | Prohibitin, antiproliferative protein (by homology)                          |
| CA4712 | orf19.6947  | <i>GTT1.3</i>   | 1.0  | -1.1 | -1.2 | -1.2 | YIR038C | <i>GTT1</i>   | 1.0 | -1.1 | -1.2 | -1.4 | glutathione S-transferase, 3-prime end (by homology)                         |
| CA4713 | orf19.6948  | <i>CCC1</i>     | 1.0  | -1.7 | -1.4 | -1.5 | YLR220W | <i>CCC1</i>   | 1.0 | -1.3 | -1.1 | -1.3 | Transmembrane Ca2+ transporter (by homology)                                 |
| CA4714 | orf19.6950  | <i>IPF5912</i>  | -1.1 | 1.0  | 1.0  | -1.0 | YDR352W |               | 1.0 | -1.1 | 1.3  | 1.0  | unknown function                                                             |
| CA4715 | orf19.6951  | <i>DPL1</i>     | 1.1  | 1.1  | 1.1  | 1.1  | YDR294C | <i>DPL1</i>   | 1.0 | -1.5 | -1.3 | -1.0 | dihydrospingosine phosphate lyase (by homology)                              |
| CA4716 | orf19.6952  | <i>IPF8666</i>  | -1.0 | 1.1  | 1.1  | 1.1  | YDR295C | <i>PLO2</i>   | 1.0 | -1.6 | -1.8 | -1.4 | unknown function                                                             |
| CA4717 | orf19.6953  | <i>IPF8663</i>  | -1.1 | -1.1 | -1.3 | -1.1 | YJL083W |               | 1.0 | -1.1 | -1.3 | -1.1 | Unknown function                                                             |
| CA4718 | orf19.6955  | <i>IPF8661</i>  | -1.0 | -1.2 | -1.3 | -1.1 | YOR056C |               | 1.0 | 1.3  | 1.6  | 1.7  | unknown function                                                             |
| CA4719 | orf19.6956  | <i>DAL5</i>     | 1.0  | 1.1  | 1.2  | 1.1  | YJR152W | <i>DAL5</i>   | 1.0 | -1.7 | -1.5 | -1.7 | allantoate permease (by homology)                                            |
| CA4720 | orf19.6958  | <i>ECM18</i>    | 1.0  | 1.2  | 1.0  | 1.0  | YDR125C | <i>ECM18</i>  | 1.0 | -1.8 | -1.6 | -1.3 | Involved in cell wall biogenesis and architecture (by homology)              |
| CA4721 | orf19.12330 | <i>CPP1</i>     | -1.1 | -1.0 | -1.1 | -1.1 | YNL053W | <i>MSG5</i>   | 1.0 | -1.1 | -1.1 | -1.1 | probable protein-tyrosine phosphatase                                        |
| CA4722 | orf19.12329 | <i>SAC1</i>     | 1.1  | 1.1  | 1.3  | 1.2  | YKL212W | <i>SAC1</i>   | 1.0 | -1.1 | 1.3  | 1.6  | integral membrane protein localizing to the ER and Golgi (by homology)       |
| CA4723 | orf19.12328 | <i>IPF18177</i> | 1.1  | -1.3 | -1.2 | -1.2 | YKL094W | <i>YJU3</i>   | 1.0 | -2.8 | -2.0 | -1.7 | Unknown function                                                             |
| CA4724 | orf19.12327 | <i>PDC2</i>     | -1.1 | -1.1 | -1.1 | -1.2 | YDR081C | <i>PDC2</i>   | 1.0 | 1.1  | 1.1  | 1.1  | pyruvate decarboxylase regulator                                             |
| CA4725 |             | <i>PET100</i>   | -1.0 | 1.0  | 1.0  | -1.0 | YDR079W | <i>PET100</i> | 1.0 | -1.7 | -1.3 | -1.4 | cytochrome-c oxidase assembly protein (by homology)                          |
| CA4726 | orf19.12326 | <i>IPF12255</i> | 1.1  | 1.2  | 1.2  | 1.1  | YDR084C |               | 1.0 | 1.3  | 1.8  | 1.6  | unknown function                                                             |
| CA4728 | orf19.12322 | <i>VPS41.3F</i> | -1.2 | -1.2 | -1.3 | -1.2 | YDR080W | <i>VPS41</i>  | 1.0 | -1.2 | -1.1 | -1.1 | required for the vacuolar assembly, 3-prime end (by homology)                |
| CA4732 | orf19.4855  | <i>IPF7733</i>  | -1.1 | -1.1 | -1.0 | -1.0 | YCR063W | <i>BUD31</i>  | 1.0 | 1.3  | -1.1 | 1.1  | unknown function                                                             |
| CA4733 | orf19.4853  | <i>IPF7732</i>  | -1.0 | -1.0 | -1.0 | 1.0  | YCR065W | <i>HCM1</i>   | 1.0 | -1.1 | -1.4 | -1.1 | similar to Saccharomyces cerevisiae Hcm1p transcription factor with fork     |
| CA4734 | orf19.4851  | <i>TFA1</i>     | -1.0 | -1.0 | -1.1 | 1.1  | YKL028W | <i>TFA1</i>   | 1.0 | -1.1 | -1.1 | -1.1 | Large subunit of transcription factor tflIE                                  |
| CA4735 | orf19.4850  | <i>IPF7726</i>  | -1.2 | 1.1  | 1.0  | -1.1 | YPL260W |               | 1.0 | 1.1  | 1.6  | 1.2  | unknown function                                                             |
| CA4736 | orf19.4849  | <i>IPF4503</i>  | 1.0  | 1.0  | -1.1 | -1.0 | YIR011C | <i>STS1</i>   | 1.0 | 1.1  | 1.3  | 1.3  | unknown function                                                             |
| CA4737 | orf19.4848  | <i>SKI3</i>     | 1.0  | 1.0  | -1.0 | -1.0 | YPR189W | <i>SKI3</i>   | 1.0 | -1.5 | -1.6 | -1.4 | antiviral protein                                                            |
| CA4738 | orf19.4846  | <i>IPF4500</i>  | -1.0 | -1.0 | -1.0 | -1.0 | YGR210C |               | 1.0 | 1.0  | 1.3  | 1.1  | putative GTP-binding protein (by homology)                                   |
| CA4739 | orf19.4845  | <i>IPF4498</i>  | 1.4  | 1.2  | 2.1  | 1.5  | YMR071C |               | 1.0 | -1.7 | -1.4 | -1.6 | unknown function                                                             |
| CA4740 | orf19.4844  | <i>IPF4497</i>  | 1.0  | -1.1 | 1.0  | -1.0 | YIL079C |               | 1.0 | 1.0  | -1.1 | 1.1  | unknown function                                                             |
| CA4741 | orf19.4843  | <i>IPF4496</i>  | -1.1 | -1.0 | -1.0 | -1.0 | YLR047C |               | 1.0 | -1.5 | -1.7 | -1.5 | unknown function                                                             |
| CA4742 | orf19.4841  | <i>SHY1</i>     | 1.1  | -1.1 | 1.1  | 1.0  | YGR112W | <i>SHY1</i>   | 1.0 | -1.1 | 1.1  | 1.3  | SURF homologue protein (by homology)                                         |
| CA4743 | orf19.4839  | <i>IPF4491</i>  | -1.0 | -1.0 | -1.1 | -1.0 | YER083C |               | 1.0 | -1.4 | -1.4 | -1.4 | unknown function                                                             |
| CA4744 | orf19.4837  | <i>IPF4489</i>  | 1.0  | 1.0  | 1.1  | 1.0  | YGR113W | <i>DAM1</i>   | 1.0 | -1.1 | 1.2  | 1.4  | unknown function                                                             |
| CA4746 | orf19.4835  | <i>IPF4485</i>  | -1.0 | -1.2 | -1.2 | -1.1 | YER082C | <i>KRE31</i>  | 1.0 | -1.8 | -1.8 | -1.5 | unknown function                                                             |
| CA4748 | orf19.4833  | <i>MLS1</i>     | -1.6 | -4.2 | -7.3 | -4.8 | YNL117W | <i>MLS1</i>   | 1.0 | -3.7 | -3.8 | -3.3 | malate synthase                                                              |



|        |            |                  |      |      |      |      |         |               |     |      |      |      |                                                                                 |
|--------|------------|------------------|------|------|------|------|---------|---------------|-----|------|------|------|---------------------------------------------------------------------------------|
| CA4750 | orf19.4829 | <i>IPF4477</i>   | -1.0 | 1.1  | 1.2  | 1.1  | YKL213C | <i>DOA1</i>   | 1.0 | -1.3 | -1.1 | -1.2 | similar to <i>Saccharomyces cerevisiae</i> Doa1p involved in ubiquitin-depend   |
| CA4752 | orf19.4827 | <i>ADE12</i>     | -1.5 | -1.3 | -1.2 | -1.2 | YNL220W | <i>ADE12</i>  | 1.0 | -1.1 | 1.1  | 1.5  | adenylosuccinate synthetase (by homology)                                       |
| CA4753 | orf19.4826 | <i>IDH1.3</i>    | -1.1 | 1.0  | -1.1 | 1.1  | YNL037C | <i>IDH1</i>   | 1.0 | -1.3 | -1.7 | -2.9 | isocitrate dehydrogenase (NAD+) subunit1, mitochondrial, 3-prime end (t         |
| CA4754 | orf19.4825 | <i>IPF11479</i>  | 1.1  | 1.0  | 1.1  | 1.1  | YIL098C | <i>FMC1</i>   | 1.0 | -1.1 | -1.2 | -1.4 | unknown function                                                                |
| CA4758 | orf19.3986 | <i>PPR1</i>      | -1.0 | 1.0  | -1.1 | -1.0 | YLR014C | <i>PPR1</i>   | 1.0 | -1.0 | -1.1 | 1.1  | transcription factor regulating pyrimidine pathway (by homology)                |
| CA4760 | orf19.3990 | <i>IPF9652</i>   | 1.0  | 1.0  | -1.1 | -1.0 | YJL011C |               | 1.0 | -1.2 | -1.2 | -1.4 | unknown function                                                                |
| CA4761 | orf19.3991 | <i>IPF9650</i>   | -1.2 | -1.0 | -1.2 | -1.0 | YGL144C |               | 1.0 | -1.4 | -1.4 | -1.0 | lipase family protein containing serine active site (by homology)               |
| CA4762 | orf19.3994 | <i>IPF9647</i>   | 1.2  | 1.4  | 1.6  | 1.8  | YOR085W | <i>OST3</i>   | 1.0 | 1.3  | 1.8  | 1.5  | similar to <i>Saccharomyces cerevisiae</i> Ost3p oligosaccharyltransferase ga   |
| CA4763 | orf19.3995 | <i>IPF9645</i>   | -1.1 | -1.0 | -1.1 | 1.0  | YMR154C | <i>RIM13</i>  | 1.0 | 1.0  | 1.1  | 1.3  | similar to <i>Saccharomyces cerevisiae</i> Rim13p calpain-like cysteine protea  |
| CA4764 | orf19.3996 | <i>GPI10</i>     | 1.2  | 1.5  | 1.8  | 1.6  | YGL142C | <i>GPI10</i>  | 1.0 | -1.0 | -1.2 | 1.0  | required for Glycosyl Phosphatidyl Inositol synthesis (by homc                  |
| CA4768 | orf19.4000 | <i>IPF9385</i>   | 1.0  | -1.1 | -1.1 | -1.0 | YDL106C | <i>PHO2</i>   | 1.0 | 1.1  | 1.2  | 1.0  | similar to <i>Saccharomyces cerevisiae</i> Pho2p homeobox-domain containi       |
| CA4769 | orf19.4001 | <i>IPF9384</i>   | -1.1 | -1.1 | -1.1 | -1.1 | YDL107W | <i>MSS2</i>   | 1.0 | -1.2 | -1.4 | -1.5 | similar to <i>Saccharomyces cerevisiae</i> Mss2p serine/threonine protein kina  |
| CA4770 | orf19.4002 | <i>IPF9382.3</i> | 1.0  | 1.1  | 1.0  | 1.0  | YDL101C | <i>DUN1</i>   | 1.0 | -1.4 | -1.4 | -1.7 | similar to <i>Saccharomyces cerevisiae</i> Dun1p protein kinase, 3-prime end    |
| CA4771 | orf19.4003 | <i>IPF3336</i>   | -1.2 | -1.0 | -1.2 | -1.1 | YGL145W | <i>TIP20</i>  | 1.0 | -1.6 | -1.1 | 1.1  | unknown function                                                                |
| CA4772 | orf19.4004 | <i>CCT3</i>      | -1.0 | -1.4 | -1.5 | -1.3 | YJL014W | <i>CCT3</i>   | 1.0 | 1.3  | 1.8  | 2.3  | Chaperonin (by homology)                                                        |
| CA4773 | orf19.4005 | <i>IPF3340</i>   | 1.1  | 1.0  | -1.0 | -1.0 | YDR196C |               | 1.0 | -1.1 | -1.2 | -1.6 | unknown function                                                                |
| CA4774 | orf19.4006 | <i>IPF3341</i>   | -1.1 | -1.0 | -1.1 | -1.0 | YHR063C | <i>PAN5</i>   | 1.0 | 1.0  | 1.2  | 1.2  | Unknown function                                                                |
| CA4775 | orf19.4007 | <i>IPF3342</i>   | -1.1 | -1.0 | 1.0  | -1.1 | YDR198C |               | 1.0 | -1.4 | -1.1 | -1.1 | Unknown function                                                                |
| CA4776 | orf19.4009 | <i>CNB1</i>      | 1.1  | 1.1  | 1.0  | 1.1  | YKL190W | <i>CNB1</i>   | 1.0 | -1.4 | -1.3 | -1.1 | Protein phosphatase, Calcineurin B (by homology)                                |
| CA4777 | orf19.4010 | <i>PAN3</i>      | 2.6  | 1.0  | 1.1  | 1.0  | YKL025C | <i>PAN3</i>   | 1.0 | -1.1 | 1.0  | 1.2  | component of the Pab1p-dependent poly(A) ribonuclease (by hom                   |
| CA4779 | orf19.4012 | <i>IPF3351</i>   | 1.0  | 1.2  | 1.1  | 1.0  | YHR071W | <i>PCL5</i>   | 1.0 | -1.0 | 1.3  | 1.8  | unknown function                                                                |
| CA4780 | orf19.4013 | <i>IPF3352</i>   | 1.0  | 1.1  | 1.1  | 1.2  | YHR045W |               | 1.0 | -1.2 | -1.1 | 1.1  | unknown function                                                                |
| CA4783 | orf19.4016 | <i>IPF3358</i>   | -1.1 | -1.3 | -1.6 | -1.4 | YBL045C | <i>COR1</i>   | 1.0 | -1.8 | -1.9 | -2.4 | ubiquinol-cytochrome-c reductase (by homology)                                  |
| CA4785 | orf19.4018 | <i>IPF3361</i>   | 1.2  | -1.1 | -1.1 | -1.1 | YJR113C | <i>RSM7</i>   | 1.0 | 1.2  | 1.1  | 1.2  | putative mitochondrial ribosomal protein S7 (by homology)                       |
| CA4786 | orf19.4019 | <i>IPF3362</i>   | 1.0  | -1.0 | 1.1  | 1.0  | YBL046W |               | 1.0 | -1.6 | -1.4 | 1.2  | Unknown function                                                                |
| CA4789 | orf19.4023 | <i>IPF3366</i>   | 1.1  | 1.0  | 1.0  | 1.0  | YPR166C | <i>MRP2</i>   | 1.0 | -1.1 | -1.1 | -1.2 | Mitochondrial ribosomal protein (by homology)                                   |
| CA4790 | orf19.4024 | <i>IPF3367</i>   | -1.1 | -1.1 | -1.2 | -1.0 | YBR256C | <i>RIB5</i>   | 1.0 | 1.5  | 1.3  | 1.6  | Riboflavin synthase (by homology)                                               |
| CA4791 | orf19.4025 | <i>IPF3370</i>   | 1.4  | 1.4  | 1.4  | 1.4  | YER012W | <i>PRE1</i>   | 1.0 | -1.1 | -1.0 | -1.1 | similar to <i>Saccharomyces cerevisiae</i> Pre1p 20S proteasome subunit C11     |
| CA4792 | orf19.4026 | <i>HIS1</i>      | 1.1  | 1.1  | 1.1  | 1.1  | YER055C | <i>HIS1</i>   | 1.0 | 1.6  | 1.2  | 3.6  | ATP phosphoribosyltransferase                                                   |
| CA4793 | orf19.4028 | <i>IPF3375</i>   | -1.0 | -1.0 | -1.1 | -1.1 | YBR002C | <i>RER2</i>   | 1.0 | 1.0  | 1.1  | 1.4  | similar to <i>Saccharomyces cerevisiae</i> Rer2p cis-prenyltransferase, a key e |
| CA4794 | orf19.4029 | <i>SQT1</i>      | 1.1  | 1.1  | -1.0 | -1.0 | YIR012W | <i>SQT1</i>   | 1.0 | 1.4  | 1.5  | 2.4  | suppresses dominant-negative mutants of the ribosomal protein G                 |
| CA4795 | orf19.4030 | <i>IPF3378</i>   | -1.1 | -1.1 | -1.0 | -1.1 | YIR008C | <i>PRI1</i>   | 1.0 | -1.1 | 1.2  | 1.0  | similar to <i>Saccharomyces cerevisiae</i> Pri1p DNA-directed DNA polymerase    |
| CA4796 | orf19.4031 | <i>IPF3380</i>   | 1.1  | -1.1 | -1.2 | -1.2 | YIR007W |               | 1.0 | -1.3 | -1.1 | -1.2 | unknown function                                                                |
| CA4797 | orf19.4033 | <i>PRP22</i>     | -1.0 | -1.0 | -1.1 | -1.1 | YER013W | <i>PRP22</i>  | 1.0 | -1.2 | -1.3 | -1.2 | RNA-dependent ATPase (by homology)                                              |
| CA4798 | orf19.4032 | <i>RPN5.3F</i>   | -1.1 | 1.1  | 1.0  | -1.0 | YDL147W | <i>RPN5</i>   | 1.0 | 1.2  | 1.7  | 1.5  | subunit of the regulatory particle of the proteasome, 3-prime end (by hor       |
| CA4800 | orf19.4035 | <i>IPF8796</i>   | -1.1 | 1.1  | 1.1  | 1.1  | YOL030W |               | 1.0 | 1.6  | 1.8  | 1.9  | putative GPI-anchored protein related to Phr1, Phr2 and Phr3 (by homo           |
| CA4801 | orf19.4036 | <i>APM1</i>      | -1.0 | -1.1 | -1.0 | -1.0 | YPL259C | <i>APM1</i>   | 1.0 | 1.0  | 1.4  | 1.5  | AP-1 complex subunit, mu1 subunit (by homology)                                 |
| CA4802 | orf19.4040 | <i>ILV3</i>      | 2.8  | 1.0  | 1.0  | 1.0  | YJR016C | <i>ILV3</i>   | 1.0 | -1.9 | -1.3 | 1.0  | dihydroxyacid dehydratase (by homology)                                         |
| CA4803 | orf19.4041 | <i>PEX4</i>      | 1.3  | -2.5 | -3.0 | -2.4 | YGR133W | <i>PEX4</i>   | 1.0 | -1.3 | -1.3 | -1.1 | E2 ubiquitin-conjugating enzyme -peroxin (by homology)                          |
| CA4804 | orf19.2098 | <i>ARO8</i>      | -1.3 | -1.2 | -1.3 | -1.2 | YGL202W | <i>ARO8</i>   | 1.0 | 1.3  | 1.5  | 2.0  | aromatic amino acid aminotransferase I (by homology)                            |
| CA4805 | orf19.2097 | <i>RAD5</i>      | -1.0 | 1.0  | -1.0 | -1.0 | YLR032W | <i>RAD5</i>   | 1.0 | -1.1 | 1.0  | 1.0  | DNA helicase (by homology)                                                      |
| CA4806 | orf19.2095 | <i>IPF1155</i>   | -1.2 | -1.0 | -1.1 | -1.1 | YLL029W |               | 1.0 | 1.1  | 1.0  | -1.1 | Putative dipeptidase (by homology)                                              |
| CA4807 | orf19.2094 | <i>PDR6</i>      | -1.2 | 1.1  | 1.2  | 1.2  | YGL016W | <i>KAP122</i> | 1.0 | 1.2  | 1.1  | 1.4  | Pleiotropic drug resistance regulatory protein (by homology)                    |
| CA4808 | orf19.2093 | <i>RFA1</i>      | -1.6 | -1.2 | -1.4 | -1.3 | YAR007C | <i>RFA1</i>   | 1.0 | 1.2  | 1.4  | 2.2  | DNA replication factor A, 69 KD subunit (by homology)                           |
| CA4809 | orf19.2092 | <i>IPF1162</i>   | -1.0 | 1.3  | 1.3  | 1.2  | YGL184C | <i>STR3</i>   | 1.0 | -1.0 | -1.2 | -1.2 | Cystathionine beta-lyase (by homology)                                          |
| CA4811 | orf19.2090 | <i>ECM16</i>     | -1.0 | -1.1 | -1.1 | -1.1 | YMR128W | <i>ECM16</i>  | 1.0 | -1.1 | -1.1 | -1.0 | RNA helicase (by homology)                                                      |
| CA4812 | orf19.2089 | <i>IPF1171</i>   | 1.0  | -1.1 | -1.0 | -1.0 | YLR093C | <i>NYV1</i>   | 1.0 | 1.1  | 1.1  | -1.0 | Putative synaptobrevin (by homology)                                            |
| CA4813 | orf19.2088 | <i>DPB4</i>      | -1.0 | 1.1  | -1.1 | 1.0  | YDR121W | <i>DPB4</i>   | 1.0 | 1.1  | 1.2  | 1.2  | DNA-directed DNA polymerase epsilon, subunit D (by homology)                    |
| CA4814 | orf19.2087 | <i>SAS2</i>      | 1.1  | 1.1  | 1.1  | 1.0  | YMR127C | <i>SAS2</i>   | 1.0 | 1.2  | 1.1  | 1.2  | Zinc finger protein involved in silencing (by homology)                         |
| CA4815 | orf19.2084 | <i>CDH1</i>      | -1.0 | 1.0  | -1.0 | -1.0 | YGL003C | <i>CDH1</i>   | 1.0 | 2.0  | 3.2  | 4.6  | Substrate-specific activator of APC-dependent proteolysis (by homology)         |
| CA4817 | orf19.2081 | <i>POM152</i>    | -1.1 | 1.0  | -1.3 | -1.2 | YMR129W | <i>POM152</i> | 1.0 | -1.3 | 1.0  | 1.2  | Nuclear pore membrane glycoprotein (by homology)                                |
| CA4818 | orf19.2079 | <i>IPF1193</i>   | 1.3  | 1.2  | 1.3  | 1.1  | YHL018W |               | 1.0 | -1.6 | -1.5 | -1.2 | unknown function                                                                |
| CA4819 | orf19.2078 | <i>IPF1194</i>   | -1.1 | 1.2  | -1.0 | 1.1  | YHL019C | <i>APM2</i>   | 1.0 | -1.2 | -1.3 | -1.3 | Similar to clathrin coat proteins                                               |
| CA4821 | orf19.2076 | <i>IPF1197</i>   | -1.0 | -1.1 | 1.0  | -1.1 | YMR130W |               | 1.0 | 1.2  | 1.2  | 1.4  | unknown function                                                                |
| CA4822 | orf19.2075 | <i>DFG5</i>      | 1.1  | 1.4  | 1.9  | 1.5  | YMR238W | <i>DFG5</i>   | 1.0 | -1.1 | 1.0  | 1.2  | Required for filamentous growth (by homology)                                   |
| CA4823 | orf19.2073 | <i>ERC3</i>      | 1.1  | 1.6  | 2.4  | 1.5  | YDR338C |               | 1.0 | 1.0  | 1.0  | 1.1  | ethionine resistance protein (by homology)                                      |
| CA4824 | orf19.2072 | <i>HNM2</i>      | -1.0 | 1.1  | -1.0 | -1.0 | YGL077C | <i>HNM1</i>   | 1.0 | -1.3 | -1.2 | -1.2 | Choline permease (by homology)                                                  |
| CA4826 | orf19.2070 | <i>IPF1206</i>   | -1.1 | -1.1 | -1.3 | -1.2 | YLR033W | <i>RSC58</i>  | 1.0 | -1.1 | 1.0  | -1.1 | unknown function                                                                |
| CA4827 | orf19.2069 | <i>SMF2</i>      | -1.1 | 2.0  | 3.3  | 2.1  | YLR034C | <i>SMF3</i>   | 1.0 | 1.0  | 1.0  | 1.2  | Manganese transporter (by homology)                                             |
| CA4829 | orf19.2067 | <i>IPF1210</i>   | -1.0 | 1.1  | 1.1  | 1.1  | YKL040C | <i>NFU1</i>   | 1.0 | 1.1  | -1.0 | -1.0 | similar to <i>Saccharomyces cerevisiae</i> Nfu1p involved in homeostasis (by l  |
| CA4831 | orf19.2066 | <i>IPF1212</i>   | -1.1 | -1.2 | -1.0 | -1.2 | YJR129C |               | 1.0 | -1.3 | -1.3 | -1.3 | unknown function                                                                |



|        |            |             |      |      |      |      |         |       |     |      |      |      |                                                                             |
|--------|------------|-------------|------|------|------|------|---------|-------|-----|------|------|------|-----------------------------------------------------------------------------|
| CA4832 | orf19.2065 | DAL2        | -1.0 | -1.0 | -1.1 | -1.0 | YIR029W | DAL2  | 1.0 | -1.2 | -1.1 | -1.2 | Allantoinase                                                                |
| CA4838 | orf19.2057 | YTA12       | -1.4 | -1.3 | -1.8 | -1.5 | YMR089C | YTA12 | 1.0 | -1.3 | 1.2  | -1.1 | Protease of the SEC18/CDC48/PAS1 family of ATPases (AAA) (by homology)      |
| CA4839 | orf19.2055 | NPL6        | 1.0  | -1.1 | -1.1 | -1.2 | YMR091C | NPL6  | 1.0 | 1.0  | 1.2  | 1.2  | Nuclear protein localization factor (by homology)                           |
| CA4841 | orf19.3809 | IPF10355    | 1.2  | 1.0  | 1.0  | -1.1 | YKR099W | BAS1  | 1.0 | 1.1  | 1.2  | 1.1  | unknown function                                                            |
| CA4842 | orf19.3810 | MTD1        | 1.1  | -1.3 | -1.2 | -1.1 | YKR080W | MTD1  | 1.0 | -1.5 | -1.7 | -1.7 | methylenetetrahydrofolate dehydrogenase                                     |
| CA4843 | orf19.3811 | GYP1        | -1.1 | 1.1  | 1.2  | -1.0 | YOR070C | GYP1  | 1.0 | -1.4 | -1.2 | -1.4 | GTPase activating protein (by homology)                                     |
| CA4844 | orf19.3812 | PDR13       | -1.3 | 1.1  | -1.0 | -1.1 | YHR064C | PDR13 | 1.0 | 1.0  | 1.6  | 1.7  | Drug resistance                                                             |
| CA4847 | orf19.3815 | IPF6951     | 1.0  | 1.2  | -1.0 | 1.0  | YKR098C | UBP11 | 1.0 | 1.1  | 1.1  | 1.2  | similar to Saccharomyces cerevisiae Ubp11p ubiquitin C-terminal hydrolase   |
| CA4848 | orf19.3817 | RTS2        | 1.1  | 1.1  | 1.1  | 1.0  | YOR077W | RTS2  | 1.0 | -1.1 | -1.1 | -1.1 | Unknown function                                                            |
| CA4852 | orf19.3822 | SCS7        | 1.1  | 1.7  | 4.1  | 2.0  | YMR272C | SCS7  | 1.0 | 1.0  | 1.3  | 1.7  | Required for hydroxylation of ceramide (by homology)                        |
| CA4853 | orf19.3823 | IPF5823     | 1.0  | 1.0  | -1.1 | -1.0 | YMR273C | ZDS1  |     |      |      |      | similar to Saccharomyces cerevisiae Zds1p involved in negative regulative   |
| CA4854 | orf19.3825 | RCE1        | 1.2  | 1.3  | 1.7  | 1.4  | YMR274C | RCE1  | 1.0 | -1.2 | 1.0  | 1.1  | CAAX PRENYL PROTEASE 2 (by homology)                                        |
| CA4856 | orf19.3827 | IPF15950    | 1.1  | -1.1 | 1.0  | -1.1 | YKR087C |       | 1.0 | -1.1 | -1.1 | -1.3 | unknown function                                                            |
| CA4858 | orf19.3831 | IPF15927.3F | -1.0 | 1.0  | 1.0  | -1.0 | YGR280C |       | 1.0 | -1.0 | 1.1  | 1.0  | similar to Saccharomyces cerevisiae Tfc3p transcription initiation factor T |
| CA4859 | orf19.3833 | IPF15927.5F | -1.1 | -1.1 | -1.2 | -1.0 | YAL001C | TFC3  | 1.0 | -1.1 | -1.2 | -1.1 | similar to Saccharomyces cerevisiae Tfc3p transcription initiation factor T |
| CA4861 | orf19.3836 | IPF4094     | 1.0  | 1.1  | -1.2 | -1.0 | YGR001C |       | 1.0 | -1.9 | -1.2 | -1.0 | unknown function                                                            |
| CA4862 | orf19.3838 | EFB1        | 1.2  | 1.4  | 1.6  | 1.6  | YAL003W | EFB1  | 1.0 | 1.2  | 1.1  | 2.0  | translation elongation factor eEF1beta                                      |
| CA4864 | orf19.3840 | IPF4087     | -1.1 | -1.4 | -1.8 | -1.4 | YER129W | PAK1  | 1.0 | -1.4 | -1.9 | -1.8 | similar to Saccharomyces cerevisiae Pak1p protein kinase suppressing        |
| CA4865 | orf19.3841 | IPF4085     | -1.1 | -1.0 | 1.0  | -1.0 | YGL180W | APG1  | 1.0 | 1.0  | -1.3 | -1.2 | similar to Saccharomyces cerevisiae Apg1p essential for autophagocytosis    |
| CA4866 | orf19.3843 | IPF4083     | -1.1 | -1.0 | -1.2 | 1.4  | YBR171W | SEC66 | 1.0 | 1.1  | 1.1  | 1.2  | similar to Saccharomyces cerevisiae Sec66p ER protein-translocation co      |
| CA4867 | orf19.3844 | IPF4080     | -1.0 | 1.0  | -1.0 | 1.1  | YKL142W | MRP8  | 1.0 | -2.4 | -1.8 | -2.9 | similar to Saccharomyces cerevisiae Mrp8p ribosomal protein, mitochondria   |
| CA4869 | orf19.3846 | LYS4        | -1.1 | -1.1 | -1.3 | -1.3 | YDR234W | LYS4  | 1.0 | 1.4  | 1.9  | 2.7  | homoaconitate hydratase                                                     |
| CA4871 | orf19.6557 | IPF1680     | -1.0 | 1.0  | 1.0  | 1.0  | YDR242W | AMD2  |     |      |      |      | probable amidase                                                            |
| CA4874 | orf19.6559 | IPF1674     | 1.0  | 2.5  | 2.1  | 2.1  | YNL108C |       | 1.0 | -1.2 | -1.4 | -1.1 | putative transcription initiation factor (by homology)                      |
| CA4875 | orf19.6561 | LAT1        | -1.4 | -1.4 | -1.7 | -1.5 | YNL071W | LAT1  | 1.0 | -1.1 | 1.2  | 1.2  | Dihydroipoamide S-acetyltransferase (by homology)                           |
| CA4876 | orf19.6562 | RNH35       | 1.0  | -1.0 | -1.1 | -1.0 | YNL072W | RNH35 | 1.0 | -1.4 | -1.0 | 1.1  | RNase H (by homology)                                                       |
| CA4877 | orf19.6563 | IPF1667     | -1.1 | -1.1 | -1.1 | -1.0 | YJR054W |       | 1.0 | -1.7 | -1.9 | -2.2 | unknown function                                                            |
| CA4878 | orf19.6565 | OXA1        | -1.0 | -1.2 | -1.2 | -1.2 | YER154W | OXA1  | 1.0 | 1.5  | 1.7  | -1.1 | Cytochrome oxidase biogenesis protein (by homology)                         |
| CA4880 | orf19.6568 | RHC18       | 1.0  | -1.1 | -1.0 | -1.0 | YLR383W | RHC18 | 1.0 | -1.1 | -1.2 | -1.2 | Recombination repair protein (by homology)                                  |
| CA4883 | orf19.6573 | IPF1649     | -1.6 | -1.1 | -2.0 | -1.5 | YER155C | BEM2  | 1.0 | -1.1 | -1.1 | 1.0  | similar to Saccharomyces cerevisiae Bem2p GTPase-activating protein (GAP)   |
| CA4885 | orf19.6577 | IPF1636     | 1.3  | 1.4  | 1.9  | 1.6  | YLL028W | TPO1  | 1.0 | -1.3 | -1.7 | -1.8 | similar to Saccharomyces cerevisiae Tpo1p multidrug resistance protein      |
| CA4889 | orf19.6581 | IPF1629     | 1.0  | 1.1  | 1.1  | 1.0  | YOL003C |       | 1.0 | -1.0 | -1.1 | -1.1 | unknown function                                                            |
| CA4890 | orf19.6582 | PRE10       | 1.1  | 1.1  | 1.0  | 1.2  | YOR362C | PRE10 | 1.0 | -1.8 | -2.0 | -2.9 | 20S proteasome subunit C1 (by homology)                                     |
| CA4892 | orf19.6584 | PRT1        | -1.2 | -1.3 | -1.5 | -1.3 | YOR361C | PRT1  | 1.0 | 1.2  | 1.5  | 1.8  | Translation initiation factor eIF3 (by homology)                            |
| CA4893 | orf19.6585 | IPF1621     | -1.1 | 1.1  | -1.0 | 1.0  | YAL046C |       | 1.0 | 1.0  | -1.2 | -1.2 | unknown function                                                            |
| CA4895 | orf19.6587 | IPF18161    | -1.1 | -1.3 | -1.1 | -1.1 | YDR152W |       | 1.0 | -1.1 | 1.0  | 1.1  | unknown function                                                            |
| CA4896 | orf19.6588 | IPF18160    | 1.1  | 1.0  | 1.0  | -1.0 | YDR162C | NBP2  | 1.0 | -1.3 | 1.1  | 1.5  | unknown function                                                            |
| CA4897 | orf19.6034 | TUB2.3      | 1.4  | 1.3  | 1.7  | 1.6  | YFL037W | TUB2  | 1.0 | -1.1 | 1.3  | 1.3  | Beta-tubulin, 3-prime end                                                   |
| CA4899 | orf19.6036 | IPF1460     | -1.0 | -1.0 | 1.0  | -1.1 | YLR039C | RIC1  | 1.0 | -1.7 | -1.1 | 1.2  | unknown function                                                            |
| CA4902 | orf19.6039 | SED5        | 1.0  | -1.0 | -1.1 | 1.1  | YLR026C | SED5  | 1.0 | -1.4 | -1.5 | -1.4 | Syntaxin (by homology)                                                      |
| CA4903 | orf19.6040 | SNF7        | 1.0  | -1.0 | -1.1 | -1.1 | YLR025W | SNF7  | 1.0 | -1.2 | -1.1 | -1.3 | Class E Vps protein (by homology)                                           |
| CA4904 | orf19.6041 | RPO41       | -1.2 | -1.3 | -1.9 | -1.5 | YFL036W | RPO41 | 1.0 | -1.1 | -1.3 | -1.3 | Mitochondrial DNA-directed RNA polymerase (by homology)                     |
| CA4907 | orf19.6045 | PSD1        | -1.1 | 1.1  | 1.1  | 1.1  | YNL169C | PSD1  | 1.0 | -1.2 | 1.0  | 1.2  | Phosphatidylserine decarboxylase 1 (by homology)                            |
| CA4908 | orf19.6046 | IPF1445     | -1.1 | 1.1  | -1.2 | -1.1 | YNL172W | APC1  | 1.0 | -2.5 | -1.9 | -1.5 | similar to Saccharomyces cerevisiae Apc1p subunit of anaphase-promoting     |
| CA4909 | orf19.6047 | TUF1        | -1.1 | -1.3 | -1.3 | -1.6 | YOR187W | TUF1  | 1.0 | -1.3 | -1.3 | -2.0 | Translation elongation factor TU (by homology)                              |
| CA4911 | orf19.6049 | IPF1435     | -1.1 | -1.0 | 1.0  | 1.0  | YBR156C | SLI15 | 1.0 | 1.2  | 1.3  | 1.4  | unknown function                                                            |
| CA4912 | orf19.6052 | CNS1        | 1.0  | -1.0 | -1.1 | 1.0  | YBR155W | CNS1  | 1.0 | 1.2  | 1.1  | 1.4  | Cyclophilin Seven Suppressor (by homology)                                  |
| CA4913 | orf19.6053 | CIS2        | -1.0 | 1.0  | -1.0 | -1.0 | YLR299W | ECM38 | 1.0 | 1.0  | 1.1  | 1.1  | Gamma-glutamyltransferase (by homology)                                     |
| CA4916 | orf19.6056 | IPF1425     | -1.0 | 1.0  | -1.0 | -1.0 | YOR283W |       | 1.0 | -1.3 | 1.3  | 1.7  | Hypothetical phosphoglycerate mutase (by homology)                          |
| CA4917 | orf19.6057 | ECM31       | 1.0  | -1.1 | -1.0 | -1.0 | YBR176W | ECM31 | 1.0 | -1.7 | -1.5 | -1.3 | Involved in cell wall biogenesis and architecture (by homology)             |
| CA4918 | orf19.6058 | GLO1        | 1.0  | -1.0 | 1.0  | 1.0  | YML004C | GLO1  | 1.0 | 1.1  | 1.1  | -1.2 | Glyoxalase I (by homology)                                                  |
| CA4919 | orf19.6059 | TTR1        | 1.3  | 1.7  | 1.6  | 1.8  | YDR513W | TTR1  | 1.0 | 1.4  | 1.2  | -1.1 | Glutaredoxin (by homology)                                                  |
| CA4920 | orf19.6060 | GCN20       | -1.2 | -1.1 | -1.1 | -1.1 | YFR009W | GCN20 | 1.0 | 1.1  | 1.4  | 1.4  | Positive effector of Gcn2p (by homology)                                    |
| CA4921 | orf19.6061 | IPF1416     | 1.0  | 1.5  | 1.8  | 1.5  | YPL103C |       | 1.0 | -1.1 | -1.0 | -1.1 | unknown function                                                            |
| CA4922 | orf19.6062 | IPF1415     | 1.3  | 1.1  | 1.2  | 1.1  | YPL098C |       | 1.0 | -1.1 | -1.1 | -1.2 | unknown function                                                            |
| CA4923 |            | IPF1413.3   | 1.2  | 1.2  | 1.1  | 1.2  | YFR011C |       | 1.0 | -1.2 | -1.3 | -1.9 | unknown function, 3-prime end                                               |
| CA4924 | orf19.6063 | UBP6.3      | -1.1 | 1.1  | -1.0 | 1.0  | YFR010W | UBP6  | 1.0 | 1.3  | 1.4  | 1.1  | Ubiquitin-specific protease, 3-prime end (by homology)                      |
| CA4925 | orf19.6064 | IPF1408     | 1.0  | -1.1 | -1.1 | -1.0 | YFR021W | AUT10 | 1.0 | -1.6 | -1.4 | -1.0 | unknown function                                                            |
| CA4927 | orf19.6066 | IPF1401     | 1.1  | -1.2 | -1.2 | -1.1 | YMR110C |       | 1.0 | 1.2  | 1.1  | -1.4 | similarity to aldehyde dehydrogenase (by homology)                          |
| CA4928 | orf19.6068 | IPF1399     | -1.2 | -1.5 | -1.4 | -1.4 | YDR346C |       | 1.0 | -1.1 | 1.3  | 1.8  | unknown function                                                            |
| CA4929 | orf19.6070 | ENA22       | -1.0 | 1.6  | 1.5  | 1.7  | YDR038C | ENA5  | 1.0 | -1.0 | 1.1  | 1.1  | P-type ATPase involved in Na+ efflux (by homology)                          |

|        |             |            |      |      |      |      |         |        |     |      |      |      |                                                                          |
|--------|-------------|------------|------|------|------|------|---------|--------|-----|------|------|------|--------------------------------------------------------------------------|
| CA4930 | orf19.6071  | IPF8381    | -1.2 | 1.0  | 1.1  | 1.1  | YOL076W | MDM20  | 1.0 | -1.0 | 1.1  | 1.2  | similar to Saccharomyces cerevisiae Mdm20p involved in mitochondrial i   |
| CA4932 | orf19.6073  | IPF8374    | 1.0  | 1.2  | 1.2  | 1.1  | YLR205C | HMX1   | 1.0 | -1.4 | 1.1  | 1.1  | unknown function                                                         |
| CA4933 | orf19.6074  | IPF8372    | 1.1  | -1.1 | -1.1 | 1.0  | YDL166C |        | 1.0 | -1.0 | 1.0  | 1.1  | unknown function                                                         |
| CA4934 | orf19.6075  | CDC36      | 1.1  | 1.1  | 1.0  | 1.1  | YDL165W | CDC36  | 1.0 | -1.2 | -1.1 | 1.0  | transcription factor (by homology)                                       |
| CA4935 | orf19.6076  | VPS29      | -1.0 | 1.1  | -1.0 | 1.1  | YHR012W | VPS29  | 1.0 | 1.0  | -1.1 | -1.1 | vacuolar protein sorting protein (by homology)                           |
| CA4936 | orf19.13498 | IPF8369    | 1.2  | 1.2  | 1.8  | 1.3  | YOR161C |        | 1.0 | 2.0  | 1.2  | -1.2 | unknown function                                                         |
| CA4937 | orf19.6538  | TFP3       | 1.0  | 1.1  | 1.4  | 1.2  | YPL234C | TFP3   | 1.0 | 1.2  | 1.2  | 1.1  | H <sup>+</sup> -ATPase by homology                                       |
| CA4938 | orf19.6537  | IPF5166    | -1.0 | 1.1  | 1.0  | 1.1  | YPL233W |        | 1.0 | 1.0  | -1.1 | -1.0 | unknown function                                                         |
| CA4939 | orf19.6536  | IQG1       | -1.3 | -1.1 | -1.4 | -1.2 | YPL242C | IQG1   | 1.0 | 1.0  | 1.1  | 1.0  | RAS GTPase-activating-like protein by homology                           |
| CA4941 |             | CRN1.53F   | 1.0  | -1.1 | -1.2 | -1.1 | YLR429W | CRN1   | 1.0 | -1.5 | -1.4 | -1.9 | actin-binding protein, 5-prime end (by homology)                         |
| CA4944 | orf19.6533  | MSK1       | -1.1 | -1.0 | -1.0 | -1.1 | YNL073W | MSK1   | 1.0 | -1.2 | 1.0  | 1.2  | lysyl-tRNA synthetase by homology                                        |
| CA4945 | orf19.6532  | FLX1       | 1.1  | 1.1  | 1.1  | 1.0  | YIL134W | FLX1   | 1.0 | -1.4 | -1.3 | -1.3 | MITOCHONDRIAL FAD CARRIER by homology                                    |
| CA4946 |             | TOM71      | 1.1  | 1.0  | 1.1  | 1.0  | YNL070W | TOM7   | 1.0 | -1.6 | -1.1 | -1.2 | Translocase of the outer mitochondrial membrane (by homology)            |
| CA4949 | orf19.6529  | CDC34      | 1.2  | 1.6  | 2.5  | 1.7  | YDR054C | CDC34  | 1.0 | -1.7 | -1.4 | -1.6 | Ubiquitin-conjugating enzyme (by homology)                               |
| CA4951 | orf19.6527  | IPF13607   | 1.1  | 2.2  | 3.6  | 2.4  | YJL108C | PRM10  | 1.0 | -1.0 | 1.1  | 1.2  | unknown function                                                         |
| CA4952 | orf19.6526  | IPF13609   | 1.0  | -1.0 | 1.1  | 1.1  | YPL246C |        | 1.0 | -2.1 | -1.6 | -1.3 | unknown function                                                         |
| CA4954 | orf19.6524  | TOM40      | -1.3 | -1.3 | -1.4 | -1.5 | YMR203W | TOM40  | 1.0 | -1.1 | -1.0 | -1.1 | mitochondrial import receptor chain TOM40 (by homology)                  |
| CA4956 | orf19.6520  | IPF4583    | 1.0  | 1.0  | 1.1  | 1.0  | YIL166C |        | 1.0 | -2.8 | -2.8 | -3.2 | putative allantoin permease (by homology)                                |
| CA4958 | orf19.6517  | RAD14      | -1.0 | 1.0  | -1.0 | 1.0  | YMR201C | RAD14  |     |      |      |      | nucleotide excision repair protein (by homology)                         |
| CA4959 | orf19.6515  | HSP90      | -1.2 | -1.1 | -1.5 | -1.2 | YMR186W | HSC82  | 1.0 | -1.3 | 1.1  | 1.0  | heat shock protein                                                       |
| CA4960 | orf19.6514  | IPF3912    | 1.3  | 1.1  | 1.4  | -1.0 | YPL177C | CUP9   | 1.0 | -1.0 | 1.1  | 1.0  | unknown function                                                         |
| CA4961 | orf19.6512  | IPF3916    | -1.1 | -1.1 | -1.2 | -1.1 | YJL085W | EXO70  | 1.0 | -1.0 | 1.0  | 1.1  | similar to Saccharomyces cerevisiae Exo70p 70 kDa exocyst component      |
| CA4962 | orf19.6511  | TRL1       | -1.1 | -1.1 | -1.2 | -1.1 | YJL087C | TRL1   | 1.0 | -1.3 | -1.2 | -1.1 | tRNA ligase                                                              |
| CA4965 | orf19.6508  | IPF3921    | 1.0  | 1.0  | -1.1 | -1.0 | YGR057C | LST7   | 1.0 | -1.0 | -1.0 | 1.2  | unknown function                                                         |
| CA4967 | orf19.6506  | IPF3927    | -1.1 | -1.1 | -1.1 | -1.0 | YMR075W |        | 1.0 | -1.1 | -1.0 | -1.1 | unknown function                                                         |
| CA4969 | orf19.6502  | IPF3930    | 1.1  | -1.0 | 1.1  | 1.0  | YDL114W |        | 1.0 | -1.0 | -1.0 | -1.1 | unknown function                                                         |
| CA4971 | orf19.5281  | IPF4697    | -1.0 | 1.1  | -1.6 | -1.1 | YJL080C | SCP160 | 1.0 | -1.4 | 1.2  | 1.3  | similar to Saccharomyces cerevisiae Scp160p required for maintenance     |
| CA4972 | orf19.5280  | MUP1       | 1.2  | 1.1  | 1.6  | 1.3  | YGR055W | MUP1   | 1.0 | -1.2 | -1.1 | 1.2  | High affinity methionine permease (by homology)                          |
| CA4973 | orf19.5279  | IPF4703    | 1.1  | 1.0  | 1.1  | 1.0  | YPR100W |        | 1.0 | -2.3 | -1.7 | -2.2 | unknown Function                                                         |
| CA4974 | orf19.5278  | IPF4704    | 1.0  | -1.1 | -1.2 | -1.1 | YJR111C |        | 1.0 | 1.1  | 1.0  | 1.6  | unknown Function                                                         |
| CA4975 | orf19.5277  | IPF4706    | 1.0  | -1.0 | -1.1 | -1.1 | YGR072W | UPF3   | 1.0 | -1.5 | -1.5 | -1.3 | unknown Function                                                         |
| CA4976 | orf19.5276  | IPF4708    | 1.0  | -1.0 | 1.0  | -1.0 | YOL072W | THP1   | 1.0 | -1.0 | -1.1 | 1.2  | unknown Function                                                         |
| CA4977 | orf19.5275  | IPF4710    | -1.0 | -1.1 | -1.1 | 1.0  | YLR181C |        | 1.0 | -1.3 | -1.2 | -1.1 | unknown Function                                                         |
| CA4978 | orf19.5274  | IPF2065    | 1.0  | 1.1  | -1.0 | -1.0 | YLR187W |        | 1.0 | -1.2 | -1.5 | -1.0 | unknown function                                                         |
| CA4982 | orf19.5268  | NUT2       | 1.1  | -1.0 | 1.0  | 1.0  | YPR168W | NUT2   | 1.0 | -1.5 | -1.1 | -1.2 | Negative transcription regulator from artificial reporters (by homology) |
| CA4985 | orf19.5265  | IPF2050    | 1.1  | 1.0  | 1.1  | 1.1  | YBL063W | KIP1   | 1.0 | 1.2  | 1.5  | 1.3  | similar to Saccharomyces cerevisiae Kip1p kinesin-related protein (by ho |
| CA4986 | orf19.5263  | SER33      | -1.1 | 1.6  | 1.8  | 1.5  | YIL074C | SER33  | 1.0 | -1.1 | 1.6  | 1.8  | Phosphoglycerate dehydrogenase (by homology)                             |
| CA4988 | orf19.5260  | RPN2       | -1.3 | 1.1  | -1.1 | -1.0 | YIL075C | RPN2   | 1.0 | -1.6 | -1.4 | -1.3 | Proteasome regulatory subunit (by homology)                              |
| CA4991 | orf19.5257  | LCB4       | -1.0 | 1.1  | 1.1  | 1.1  | YOR171C | LCB4   | 1.0 | 1.1  | 1.2  | 1.4  | Sphingolipid long chain base kinase (by homology)                        |
| CA4993 | orf19.5255  | PXA2       | 1.0  | -1.7 | -1.8 | -1.5 | YKL188C | PXA2   | 1.0 | 1.0  | 1.0  | 1.2  | ABC transporter, peroxisomal (by homology)                               |
| CA4999 | orf19.5248  | IPF2024    | -1.0 | -1.1 | -1.4 | -1.2 | YNR049C | MSO1   | 1.0 | 1.1  | 1.1  | 1.1  | unknown function                                                         |
| CA5000 | orf19.5247  | IPF2023    | -1.0 | 1.0  | -1.1 | -1.0 | YCR095C |        | 1.0 | -1.2 | -1.1 | -1.2 | unknown function                                                         |
| CA5003 | orf19.5244  | MCD4       | 1.3  | 1.3  | 1.6  | 1.3  | YKL165C | MCD4   | 1.0 | -1.3 | -1.3 | -1.1 | Sporulation protein (by homology)                                        |
| CA5004 | orf19.5243  | TRP3       | -1.2 | -1.2 | -1.2 | -1.3 | YKL211C | TRP3   | 1.0 | -1.2 | -1.0 | 1.5  | Anthranilate synthase / indole glycerol phosphate synthase (by homology) |
| CA5006 | orf19.5241  | IPF12584   | 1.1  | -1.3 | -1.4 | -1.3 | YCR033W |        | 1.0 | -1.1 | -1.1 | 1.1  | unknown function                                                         |
| CA5007 | orf19.5239  | IPF12579   | -1.0 | 1.0  | 1.0  | 1.1  | YNL040W |        | 1.0 | -1.0 | -1.0 | -1.1 | putative phospholipase A2 (by homology)                                  |
| CA5009 | orf19.5237  | VPH2       | -1.1 | -1.1 | -1.0 | 1.0  | YKL119C | VPH2   | 1.0 | -1.5 | -1.5 | -1.5 | H <sup>+</sup> -ATPase assembly protein (by homology)                    |
| CA5014 | orf19.6966  | IPF11120   | -1.0 | -1.1 | -1.0 | -1.0 | YLR133W | CKI1   | 1.0 | -1.3 | -1.0 | -1.2 | similar to Saccharomyces cerevisiae Cki1p choline kinase (by homology)   |
| CA5018 | orf19.6971  | IPF7558    | -1.0 | 1.0  | 1.0  | 1.1  | YGR227W | DIE2   | 1.0 | -1.2 | -1.3 | -1.2 | unknown function                                                         |
| CA5021 | orf19.6975  | YST1.EXON2 | -1.1 | -1.3 | -1.3 | -1.3 | YGR214W | RPS0A  | 1.0 | 1.5  | 1.6  | 2.5  | Ribosomal protein, exon 2                                                |
| CA5023 | orf19.6976  | IPF7547    | 1.1  | -1.4 | -1.4 | -1.4 | YJL163C |        | 1.0 | -1.3 | -1.4 | -1.6 | unknown function                                                         |
| CA5024 | orf19.6977  | IPF3009    | -1.2 | 1.0  | 1.4  | 1.1  | YGR216C | GPI1   | 1.0 | -1.9 | -1.2 | -1.3 | similar to Saccharomyces cerevisiae Gpi1p required for N-acetylglucosar  |
| CA5025 | orf19.6979  | AMI3       | -1.1 | 1.2  | 1.3  | 1.2  | YOL060C | AMI3   | 1.0 | 1.0  | 1.1  | 1.1  | protein required for normal mitochondrial structure (by homology)        |
| CA5027 | orf19.6981  | IPF2999    | -1.5 | -1.3 | -1.6 | -1.4 | YKR051W |        | 1.0 | 1.0  | -1.0 | 1.1  | unknown function                                                         |
| CA5028 | orf19.6982  | IPF2998    | 1.0  | 1.0  | 1.0  | 1.1  | YJL131C |        | 1.0 | -1.2 | -1.5 | -1.8 | unknown function                                                         |
| CA5031 | orf19.6985  | IPF20023   | 1.0  | 1.0  | 1.1  | 1.0  | YOR337W | TEA1   | 1.0 | 1.1  | -1.2 | 1.4  | similar to Saccharomyces cerevisiae Tea1p activator of Ty1 enhance(by    |
| CA5033 | orf19.6987  | DNM1       | -1.3 | -1.2 | -1.4 | -1.1 | YLL001W | DNM1   | 1.0 | -1.5 | -1.3 | -1.1 | Dynamin-related protein (by homology)                                    |
| CA5034 | orf19.6988  | OST1       | 1.1  | 1.3  | 1.4  | 1.2  | YJL002C | OST1   | 1.0 | -1.4 | -1.3 | -1.2 | oligosaccharyltransferase                                                |
| CA5037 | orf19.6991  | PRE3       | 1.0  | 1.3  | 1.5  | 1.3  | YJL001W | PRE3   | 1.0 | 1.1  | 1.3  | 1.3  | 20S proteasome subunit (beta1)(by homology)                              |
| CA5039 | orf19.6993  | GAP2       | 1.0  | -1.0 | 1.2  | 1.1  | YKR039W | GAP1   | 1.0 | 1.1  | 1.1  | 1.3  | general amino acid permease (by homology)                                |
| CA5046 | orf19.7001  | YCK2       | 1.2  | 1.2  | 1.5  | 1.4  | YNL154C | YCK2   | 1.0 | 1.2  | 1.8  | 2.0  | casein kinase I (by homology)                                            |

|        |             |                  |      |      |      |      |         |               |     |      |      |      |                                                                                 |
|--------|-------------|------------------|------|------|------|------|---------|---------------|-----|------|------|------|---------------------------------------------------------------------------------|
| CA5048 | orf19.10530 | <i>IPF20024</i>  | -1.0 | -1.1 | 1.1  | -1.0 | YDR421W | <i>ARO80</i>  | 1.0 | -1.0 | 1.0  | -1.3 | unknown function                                                                |
| CA5049 | orf19.3013  | <i>IPF3714</i>   | -1.0 | 1.0  | 1.3  | 1.1  | YHR107C | <i>CDC12</i>  | 1.0 | -1.1 | 1.1  | 1.1  | similar to <i>Saccharomyces cerevisiae</i> Cdc12p septin (by homology)          |
| CA5050 | orf19.3014  | <i>BMH2</i>      | -1.3 | -1.1 | -1.1 | -1.1 | YDR099W | <i>BMH2</i>   | 1.0 | 1.2  | 1.4  | 1.2  | similar to <i>Saccharomyces cerevisiae</i> Bmh2p suppressor of clathrin defice  |
| CA5051 | orf19.3015  | <i>IPF3709</i>   | -1.1 | -1.0 | -1.1 | -1.1 | YDR101C |               | 1.0 | -1.5 | -1.5 | -1.1 | unknown function                                                                |
| CA5053 | orf19.3018  | <i>IPF3707</i>   | 1.0  | -1.0 | 1.0  | -1.2 | YPL138C | <i>SPP1</i>   | 1.0 | 1.2  | 1.1  | -1.1 | unknown function                                                                |
| CA5054 | orf19.3019  | <i>IPF3704</i>   | -1.0 | -1.0 | -1.0 | -1.0 | YNL218W | <i>MGS1</i>   | 1.0 | -1.4 | -1.7 | -1.3 | unknown function                                                                |
| CA5055 | orf19.3021  | <i>IPF3701</i>   | 1.0  | 1.0  | 1.0  | 1.0  | YMR114C |               | 1.0 | -1.2 | 1.0  | -1.2 | unknown function                                                                |
| CA5056 | orf19.3022  | <i>IPF3698</i>   | 1.1  | -1.3 | -1.4 | -1.2 | YDR175C | <i>RSM24</i>  | 1.0 | -1.5 | -1.5 | -1.6 | similar to <i>Saccharomyces cerevisiae</i> Rsm24p mitochondrial ribosomal pr    |
| CA5057 | orf19.3023  | <i>IPF3695</i>   | -1.0 | -1.2 | -1.3 | -1.1 | YDR176W | <i>NGG1</i>   | 1.0 | 1.7  | 1.7  | 2.0  | similar to <i>Saccharomyces cerevisiae</i> Ngg1p general transcriptional adapt  |
| CA5060 | orf19.3029  | <i>IPF3690</i>   | -1.2 | -1.9 | -2.1 | -1.8 | YDR036C |               | 1.0 | 1.2  | 1.5  | 1.9  | unknown function                                                                |
| CA5062 | orf19.3031  | <i>SEC62</i>     | 1.0  | 1.1  | 1.3  | 1.1  | YPL094C | <i>SEC62</i>  | 1.0 | -2.1 | -1.8 | -2.1 | subunit of ER protein-translocation complex (by homology)                       |
| CA5063 | orf19.3034  | <i>IPF8493</i>   | 1.1  | -1.2 | -1.1 | -1.2 | YDR091C | <i>RLI1</i>   | 1.0 | -1.7 | -1.1 | 1.0  | putative member of nontransporter group of ATP-binding cassette (ABC)           |
| CA5064 | orf19.3035  | <i>CHD1</i>      | -1.2 | -1.1 | -1.3 | -1.1 | YER164W | <i>CHD1</i>   | 1.0 | -1.1 | 1.3  | 1.2  | transcriptional regulator (by homology)                                         |
| CA5065 | orf19.3037  | <i>IPF3584</i>   | 1.0  | 1.2  | 1.3  | 1.2  | YER165W | <i>PAB1</i>   | 1.0 | 1.7  | 2.9  | 6.1  | similar to <i>Saccharomyces cerevisiae</i> Pab1p mRNA polyadenylate-bindin      |
| CA5066 | orf19.3038  | <i>TPS2</i>      | 1.2  | 3.9  | 4.8  | 4.9  | YDR074W | <i>TPS2</i>   | 1.0 | 1.1  | -1.1 | -1.1 | Threose-6-phosphate phosphatase (by homology)                                   |
| CA5067 | orf19.3040  | <i>IPF3589</i>   | 1.1  | 1.6  | 1.9  | 1.2  | YBR177C | <i>EHT1</i>   | 1.0 | -1.3 | 1.0  | 1.3  | putative alcohol acyl transferase (by homology)                                 |
| CA5068 | orf19.3041  | <i>IPF3592</i>   | -1.0 | 1.2  | 1.2  | 1.1  | YGR068C |               | 1.0 | -1.7 | -1.7 | -1.7 | unknown function                                                                |
| CA5070 | orf19.3043  | <i>IPF3594</i>   | 1.1  | -1.0 | 1.0  | 1.0  | YDR058C | <i>TGL2</i>   | 1.0 | -1.3 | -1.3 | -1.2 | triglyceride lipase (by homology)                                               |
| CA5072 | orf19.3047  | <i>IPF3598</i>   | -1.2 | 1.0  | 1.1  | 1.0  | YNL257C | <i>SIP3</i>   | 1.0 | -1.2 | -1.2 | -1.3 | similar to <i>Saccharomyces cerevisiae</i> Sip3p protein which interacts with S |
| CA5074 | orf19.3049  | <i>IPF3607</i>   | 1.0  | 1.1  | -1.0 | 1.1  | YDR523C | <i>SPS1</i>   | 1.0 | -1.1 | -1.1 | 1.1  | putative serine/threonine protein kinase                                        |
| CA5075 | orf19.3050  | <i>IPF3610</i>   | -1.1 | -1.1 | -1.1 | -1.2 | YDR524C | <i>AGE1</i>   | 1.0 | 1.1  | 1.3  | 1.4  | unknown function                                                                |
| CA5076 | orf19.3051  | <i>IPF15301</i>  | 1.3  | -1.1 | 1.4  | 1.2  | YJR116W |               | 1.0 | -1.1 | -1.1 | -1.0 | unknown function                                                                |
| CA5077 | orf19.3052  | <i>YPT1</i>      | 1.3  | 1.2  | 1.2  | 1.2  | YFL038C | <i>YPT1</i>   | 1.0 | -1.5 | -1.1 | -1.1 | GTP-binding protein of the rab family (by homology)                             |
| CA5079 | orf19.3054  | <i>RPN3</i>      | -1.2 | 1.1  | 1.1  | 1.1  | YER021W | <i>RPN3</i>   | 1.0 | -1.2 | 1.2  | 1.1  | 26S proteasome regulatory subunit (by homology)                                 |
| CA5080 | orf19.3055  | <i>IPF9268.3</i> | -1.0 | 1.1  | 1.1  | 1.0  | YER022W | <i>SRB4</i>   | 1.0 | -1.3 | -1.2 | -1.2 | similar to <i>Saccharomyces cerevisiae</i> Srb4p DNA-directed RNA polymera      |
| CA5081 | orf19.3058  | <i>COQ6</i>      | -1.2 | -1.0 | 1.0  | 1.1  | YGR255C | <i>COQ6</i>   | 1.0 | 1.2  | 1.1  | 1.1  | monooxygenase (by homology)                                                     |
| CA5082 | orf19.3059  | <i>SUA70</i>     | -1.2 | 1.4  | 1.6  | 1.4  | YPR086W | <i>SUA7</i>   | 1.0 | 1.4  | 1.7  | 1.9  | TFIIB subunit (transcription initiation factor E)(by homology)                  |
| CA5083 | orf19.3060  | <i>IPF9278</i>   | 1.1  | 1.2  | 1.6  | 1.4  | YMR149W | <i>SWP1</i>   | 1.0 | -1.4 | -1.4 | -1.7 | similar to <i>Saccharomyces cerevisiae</i> Swp1p oligosaccharyltransferase dt   |
| CA5084 | orf19.3061  | <i>IMP1</i>      | 1.1  | 1.3  | 1.3  | 1.2  | YMR150C | <i>IMP1</i>   | 1.0 | -1.1 | -1.1 | -1.1 | protease, mitochondrial (by homology)                                           |
| CA5087 | orf19.3062  | <i>IPF20025</i>  | -1.1 | 1.0  | -1.0 | 1.0  | YKL033W |               | 1.0 | -1.4 | -1.2 | -1.2 | unknown function                                                                |
| CA5088 | orf19.3063  | <i>IPF9758</i>   | 1.0  | -1.0 | -1.1 | -1.0 | YBR278W | <i>DPB3</i>   | 1.0 | -1.3 | -1.2 | -1.0 | similar to <i>Saccharomyces cerevisiae</i> Dpb3p DNA-directed DNA polymer       |
| CA5089 | orf19.3064  | <i>MRPL27</i>    | 1.1  | 1.0  | 1.0  | 1.0  | YBR282W | <i>MRPL27</i> | 1.0 | -1.1 | -1.2 | -1.2 | ribosomal protein (by homology)                                                 |
| CA5091 | orf19.10584 | <i>ACF3</i>      | 1.1  | 1.3  | 1.2  | 1.1  | YNR067C |               | 1.0 | -1.1 | -1.2 | 1.0  | endo-1,3-beta-glucanase                                                         |
| CA5096 | orf19.6445  | <i>IPF1384</i>   | 1.1  | -1.2 | -1.3 | -1.2 | YLR284C | <i>ECI1</i>   | 1.0 | -1.5 | -1.2 | -1.1 | similar to <i>Saccharomyces cerevisiae</i> Eci1p delta3-cis-delta2-trans-enoyl- |
| CA5097 | orf19.6444  | <i>IPF1382</i>   | -1.1 | -1.4 | -1.2 | -1.6 | YHL023C |               | 1.0 | -1.2 | -1.1 | -1.2 | unknown function                                                                |
| CA5099 | orf19.6442  | <i>PRP8</i>      | 1.1  | -1.1 | -1.4 | -1.3 | YHR165C | <i>PRP8</i>   | 1.0 | -1.2 | -1.1 | -1.2 | U5 snRNP protein, pre-mRNA splicing factor (by homology)                        |
| CA5100 | orf19.6440  | <i>IPF1372</i>   | -1.1 | -1.0 | 1.0  | 1.0  | YNL008C | <i>ASI3</i>   | 1.0 | -1.3 | -1.3 | -1.2 | unknown function                                                                |
| CA5101 | orf19.6438  | <i>LCB1</i>      | -1.0 | 1.0  | 1.3  | 1.0  | YMR296C | <i>LCB1</i>   | 1.0 | -1.1 | 1.4  | 2.0  | Serine C-palmitoyltransferase subunit (by homology)                             |
| CA5102 | orf19.6437  | <i>CDC23</i>     | 1.0  | -1.0 | 1.0  | -1.0 | YHR166C | <i>CDC23</i>  | 1.0 | -1.1 | 1.1  | -1.1 | Subunit of anaphase-promoting complex (by homology)                             |
| CA5104 | orf19.6435  | <i>IPF1364</i>   | 1.4  | -1.2 | -1.2 | -1.1 | YGR243W |               | 1.0 | 1.7  | 1.5  | -1.7 | unknown function                                                                |
| CA5105 | orf19.6434  | <i>PEX19</i>     | 1.0  | -1.4 | -1.4 | -1.3 | YDL065C | <i>PEX19</i>  | 1.0 | 1.1  | 1.0  | -1.2 | Required for biogenesis of peroxisomes (by homology)                            |
| CA5106 | orf19.6432  | <i>AFG2</i>      | 1.0  | -1.1 | -1.0 | -1.0 | YLR397C | <i>AFG2</i>   | 1.0 | -1.3 | -1.4 | -1.1 | Member of the Sec18p, Pas1p, Cdc48p, TBP-1 family of ATPases (by hc             |
| CA5108 | orf19.6425  | <i>SKI2</i>      | -1.1 | -1.2 | -1.3 | -1.3 | YLR398C | <i>SKI2</i>   | 1.0 | -2.0 | -1.9 | -2.4 | Antiviral protein and putative helicase                                         |
| CA5109 | orf19.6424  | <i>UBC9</i>      | 1.0  | 1.2  | 1.1  | 1.0  | YDL064W | <i>UBC9</i>   | 1.0 | 1.3  | 1.2  | -1.1 | E2 ubiquitin-conjugating enzyme (by homology)                                   |
| CA5110 | orf19.6423  | <i>FBP26</i>     | -1.0 | -1.1 | -1.3 | -1.2 | YJL155C | <i>FBP26</i>  | 1.0 | -1.9 | -2.1 | -2.3 | Fructose-2,6-bisphosphatase (by homology)                                       |
| CA5111 | orf19.6422  | <i>SSY5</i>      | -1.1 | -1.0 | -1.1 | -1.1 | YJL156C | <i>SSY5</i>   | 1.0 | -1.4 | -1.6 | -1.5 | Involved in sulfonyleurea herbicide sensitivity (by homology)                   |
| CA5113 | orf19.6418  | <i>IPF20026</i>  | -1.1 | -1.1 | -1.2 | -1.0 | YDL063C |               | 1.0 | -1.1 | -1.1 | 1.0  | unknown function                                                                |
| CA5114 | orf19.6417  | <i>IPF1334</i>   | -1.0 | -1.2 | -1.4 | -1.2 | YDL060W | <i>TSR1</i>   | 1.0 | 1.0  | 1.4  | 2.1  | Conserved hypothetical protein                                                  |
| CA5115 | orf19.6416  | <i>IPF1331</i>   | 1.0  | 1.0  | 1.0  | 1.0  | YNL080C |               | 1.0 | -1.1 | 1.0  | 1.1  | unknown function                                                                |
| CA5116 |             | <i>TPM2.3</i>    | 1.5  | -1.1 | -1.0 | -1.0 | YIL138C | <i>TPM2</i>   | 1.0 | 1.2  | 1.3  | -1.0 | Tropomyosin, 3-prime end                                                        |
| CA5119 | orf19.6411  | <i>IPF1320</i>   | -1.4 | -1.1 | -1.4 | -1.3 | YLR386W |               | 1.0 | -1.7 | -1.6 | -1.8 | unknown function                                                                |
| CA5121 | orf19.6407  | <i>IPF1310</i>   | -1.1 | -1.1 | -1.1 | -1.0 | YLR387C |               | 1.0 | -1.1 | -1.1 | -1.1 | unknown function                                                                |
| CA5122 | orf19.6406  | <i>IPF1308</i>   | -1.0 | -1.0 | -1.1 | 1.1  | YNL081C |               | 1.0 | -1.2 | -1.1 | -1.1 | Similarity to ribosomal protein S13 (by homology)                               |
| CA5123 | orf19.6405  | <i>IPF1306</i>   | -1.0 | -1.0 | 1.0  | 1.0  | YAL018C |               | 1.0 | -1.7 | -2.1 | -1.4 | unknown function                                                                |
| CA5124 | orf19.6404  | <i>GSH2</i>      | -1.2 | -1.2 | -1.3 | -1.2 | YOL049W | <i>GSH2</i>   | 1.0 | 1.1  | 1.2  | 1.4  | Glutathione synthetase (by homology)                                            |
| CA5125 |             | <i>RPP2</i>      | 1.1  | 1.0  | -1.0 | -1.0 | YOL039W | <i>RPP2A</i>  | 1.0 | 2.3  | 2.8  | 3.3  | acidic ribosomal protein by homology                                            |
| CA5126 | orf19.6403  | <i>SLS1</i>      | 1.0  | 1.0  | -1.1 | -1.1 | YOL031C |               | 1.0 | 1.2  | 1.4  | 1.3  | Endoplasmic translocation machinery by homology                                 |
| CA5127 | orf19.6402  | <i>CYS3</i>      | -1.1 | 1.3  | 1.2  | -1.1 | YAL012W | <i>CYS3</i>   | 1.0 | -1.0 | 1.7  | 1.9  | cystathionine gamma-lyase by homology                                           |
| CA5128 | orf19.13758 | <i>IPF5118</i>   | -1.0 | 1.0  | -1.0 | 1.0  | YOL032W |               | 1.0 | 1.2  | 1.5  | 1.0  | unknown function                                                                |
| CA5129 | orf19.13757 | <i>ATS1</i>      | 1.1  | 1.0  | 1.1  | 1.0  | YAL020C | <i>ATS1</i>   | 1.0 | -1.5 | -1.4 | -1.1 | similar to <i>Saccharomyces cerevisiae</i> Ats1p suppressor of alpha-tubulin n  |
| CA5132 | orf19.6393  | <i>GTS1</i>      | 1.0  | 1.0  | 1.0  | -1.0 | YGL181W | <i>GTS1</i>   | 1.0 | -3.4 | -2.1 | -1.8 | Transcription factor by homology                                                |

|        |             |              |      |      |       |       |         |        |     |      |      |      |                                                                         |
|--------|-------------|--------------|------|------|-------|-------|---------|--------|-----|------|------|------|-------------------------------------------------------------------------|
| CA5135 | orf19.13747 | HSP104       | 1.1  | -1.0 | -1.1  | -1.0  | YLL026W | HSP104 | 1.0 | 1.1  | 1.2  | 1.3  | Heat shock protein (by homology)                                        |
| CA5137 | orf19.4574  | IPF1032      | 1.0  | 1.0  | 1.1   | -1.0  | YOR059C |        | 1.0 | -1.1 | 1.3  | 1.3  | similar to probable membrane protein [S. cerevisiae]                    |
| CA5138 | orf19.4575  | IPF1031      | -1.3 | -1.2 | -1.4  | -1.2  | YPL109C |        | 1.0 | -1.6 | -1.3 | -1.2 | Similar to aminoglycoside acetyltransferase regulator from P. stuartii  |
| CA5139 | orf19.4577  | IPF1027      | -1.0 | 1.0  | 1.1   | -1.0  | YOR371C | GPE1   | 1.0 | -1.2 | -1.2 | 1.2  | unknown function                                                        |
| CA5141 | orf19.4578  | CYT2         | 1.0  | 1.1  | 1.0   | 1.0   | YKL087C | CYT2   | 1.0 | -1.8 | -1.6 | -1.6 | holocytochrome-c1 synthase (by homology)                                |
| CA5142 | orf19.4579  | IPF1022      | 1.4  | 1.6  | 2.4   | 2.1   | YGR284C | ERV29  | 1.0 | -1.5 | -1.4 | -1.3 | similar to Saccharomyces cerevisiae Erv29p ER-Golgi transport vesicle p |
| CA5143 | orf19.4580  | IPF1020      | 1.2  | 1.4  | 1.3   | 1.3   | YJR012C |        | 1.0 | -1.0 | -1.1 | -1.1 | Weak similarity to N. crassa hypothetical protein                       |
| CA5144 | orf19.4581  | IPF1019      | 1.5  | 2.2  | 3.1   | 2.5   | YJR013W |        | 1.0 | 1.1  | -1.0 | 1.0  | unknown function                                                        |
| CA5148 | orf19.4585  | TFG1         | -1.1 | -1.0 | -1.0  | -1.1  | YGR186W | TFG1   | 1.0 | -1.7 | -1.1 | -1.1 | RNA pol.II transcription initiation factor TFIIF (by homology)          |
| CA5149 | orf19.4587  | HGH1         | -1.1 | -1.1 | -1.1  | -1.0  | YGR187C | HGH1   | 1.0 | -1.5 | -1.6 | -1.4 | Similar to human HMG1 and HMG2 proteins (by homology)                   |
| CA5150 | orf19.4589  | FMS1         | -1.0 | 1.0  | 1.1   | -1.0  | YMR020W | FMS1   | 1.0 | 1.1  | 1.2  | 1.3  | Similar to corticosteroid-binding protein CBP1 (by homology)            |
| CA5152 | orf19.4591  | CAT2         | 1.0  | -7.2 | -10.2 | -10.3 | YML042W | CAT2   | 1.0 | -1.3 | -1.8 | -2.1 | carnitine O-acetyltransferase (by homology)                             |
| CA5154 | orf19.4593  | RG2          | -1.2 | -1.2 | -1.8  | -1.5  | YOR127W | RG1    | 1.0 | -1.2 | -1.4 | -1.3 | rho-GTPase activating protein 2 (by homology)                           |
| CA5156 | orf19.4594  | CLC1         | 1.2  | -1.1 | -1.2  | 1.0   | YGR167W | CLC1   | 1.0 | 1.0  | -1.0 | -1.2 | clathrin light chain (by homology)                                      |
| CA5159 | orf19.4597  | CAP2         | 1.1  | 1.0  | -1.0  | -1.0  | YIL034C | CAP2   | 1.0 | -2.2 | -2.2 | -2.7 | F-actin capping protein, beta subunit (by homology)                     |
| CA5160 | orf19.4599  | PHO89        | 1.1  | -1.0 | 1.1   | 1.0   | YBR296C | PHO89  | 1.0 | -1.7 | 1.0  | -1.3 | Na <sup>+</sup> -coupled phosphate transport (by homology)              |
| CA5161 | orf19.4600  | IPF983       | -1.0 | -1.2 | -1.2  | -1.1  | YPL107W |        | 1.0 | -1.4 | 1.1  | 1.1  | unknown function                                                        |
| CA5163 | orf19.4601  | TFC1         | -1.0 | 1.0  | -1.0  | 1.0   | YBR123C | TFC1   | 1.0 | 1.4  | 1.4  | 1.3  | Transcription initiation factor TFIIC 95 kD subunit (by homology)       |
| CA5164 | orf19.4602  | MDH1         | 1.2  | -1.4 | -1.4  | -1.4  | YKL085W | MDH1   | 1.0 | -1.3 | -1.5 | -3.0 | Mitochondrial malate dehydrogenase precursor (by homology)              |
| CA5165 | orf19.4603  | ARL1         | -1.0 | -1.0 | -1.0  | 1.0   | YBR164C | ARL1   | 1.0 | -1.0 | -1.0 | -1.1 | GTP-binding protein of the ARF family (by homology)                     |
| CA5166 | orf19.4605  | TYR1         | 1.0  | 1.0  | -1.0  | 1.0   | YBR166C | TYR1   | 1.0 | -1.1 | -1.1 | 1.1  | Prephenate dehydrogenase (NADP <sup>+</sup> ) (by homology)             |
| CA5167 | orf19.4606  | ERG8         | -1.1 | -1.1 | -1.1  | -1.0  | YMR220W | ERG8   | 1.0 | 1.1  | 1.5  | 1.7  | Phosphomevalonate kinase (by homology)                                  |
| CA5171 | orf19.4609  | IPF6037      | 1.2  | 1.5  | 1.6   | 1.6   | YAL049C |        | 1.0 | -1.2 | -1.1 | -1.5 | Similar to Legionella pneumophila sbpA                                  |
| CA5174 | orf19.4611  | PRS4         | 1.2  | 1.1  | 1.1   | -1.1  | YER099C | PRS2   | 1.0 | -1.3 | -1.8 | -1.4 | Ribose-phosphate pyrophosphokinase 3 (by homology)                      |
| CA5176 | orf19.4614  | IPF6045      | -1.0 | -1.0 | -1.0  | 1.0   | YPR049C | CVT9   | 1.0 | -1.2 | 1.0  | 1.1  | unknown function                                                        |
| CA5177 | orf19.4615  | IPF11101     | 1.0  | 1.0  | 1.1   | 1.0   | YBR095C |        | 1.0 | -1.1 | 1.0  | -1.1 | Weak similarity to C. cerevisiae hypothetical protein (by homology)     |
| CA5178 | orf19.4616  | POL30        | -1.0 | 1.3  | 1.6   | 1.4   | YBR088C | POL30  | 1.0 | -1.0 | -1.1 | -1.1 | Proliferating Cell Nuclear Antigen (by homology)                        |
| CA5179 | orf19.4617  | MAK3         | 1.1  | 1.1  | 1.2   | 1.1   | YPR051W | MAK3   | 1.0 | -1.1 | -1.1 | 1.2  | N-acetyltransferase (by homology)                                       |
| CA5180 | orf19.4618  | FBA1         | -1.2 | 2.1  | 1.6   | 2.1   | YKL060C | FBA1   | 1.0 | 2.0  | 3.7  | 4.6  | fructose-bisphosphate aldolase (by homology)                            |
| CA5181 | orf19.4620  | TIM12        | 1.0  | 1.0  | 1.0   | 1.0   | YBR091C | MRS5   | 1.0 | -1.2 | -1.2 | -1.2 | subunit of the TIM22-complex (by homology)                              |
| CA5182 | orf19.4621  | IPF11093     | -1.0 | -1.0 | 1.1   | 1.0   | YBR094W |        | 1.0 | -1.3 | -1.2 | -1.2 | weak similarity to pig tubulin-tyrosine ligase                          |
| CA5183 | orf19.4622  | ≠11090.EXON1 | -1.2 | -1.2 | -1.9  | -1.4  | YKL054C | VID31  | 1.0 | -1.7 | -1.6 | -1.4 | weak similarity to glutenin, exon 1                                     |
| CA5186 | orf19.4624  | HRT2         | -1.0 | 1.1  | 1.2   | 1.1   | YMR027W | HRT2   | 1.0 | 1.1  | 1.4  | 1.1  | Similar to SchRT2 (by homology)                                         |
| CA5187 | orf19.4625  | TOA2         | 1.1  | 1.2  | 1.2   | 1.2   | YKL058W | TOA2   | 1.0 | -2.3 | -1.9 | -1.5 | TFIIA subunit 13.5 kD (by homology)                                     |
| CA5188 | orf19.4626  | TAP42        | -1.0 | -1.0 | 1.1   | -1.1  | YMR028W | TAP42  | 1.0 | -1.7 | -1.4 | -1.2 | Component of the Tor signaling pathway (by homology)                    |
| CA5189 | orf19.4627  | IPF10158     | -1.3 | -1.2 | -1.4  | -1.2  | YKL057C | NUP120 | 1.0 | -1.7 | -1.7 | -1.5 | Weak similarity to ScNup12p                                             |
| CA5190 | orf19.4628  | IPF10155     | 1.0  | -1.1 | -1.0  | -1.1  | YKL059C |        | 1.0 | -1.2 | 1.6  | 1.5  | unknown function                                                        |
| CA5196 | orf19.7010  | IPF2338      | -1.0 | 1.2  | 1.3   | 1.1   | YIL001W |        | 1.0 | -1.1 | 1.1  | -1.2 | unknown function                                                        |
| CA5197 | orf19.7011  | IPF2342      | -1.2 | -1.0 | -1.4  | -1.1  | YPL012W | RRP12  | 1.0 | -1.2 | 1.0  | 1.4  | unknown function                                                        |
| CA5198 | orf19.7012  | LPA4         | 1.4  | 1.0  | -1.1  | 1.1   | YPL013C |        | 1.0 | -1.1 | -1.0 | 1.0  | Similar to ribosomal protein S16, mitochondrial (by homology)           |
| CA5200 | orf19.7015  | RPL10E       | -1.2 | -1.1 | -1.1  | -1.1  | YLR340W | RPP0   | 1.0 | 1.7  | 2.6  | 3.2  | Ribosomal protein L10, cytosolic (by homology)                          |
| CA5201 | orf19.7016  | IPF2349      | -1.0 | -1.2 | -1.2  | -1.0  | YDR452W | PHM5   | 1.0 | -1.4 | -1.3 | -1.3 | similar to human sphingomyelin                                          |
| CA5202 | orf19.7017  | YOX1         | 1.1  | -1.1 | -1.3  | -1.1  | YML027W | YOX1   | 1.0 | -1.6 | -1.7 | -1.7 | Similar to homoeodomain protein (by homology)                           |
| CA5203 | orf19.7018  | RPS18        | 1.8  | 1.1  | 1.1   | 1.3   | YML026C | RPS18B |     |      |      |      | Ribosomal protein S18 (by homology)                                     |
| CA5204 | orf19.7019  | YML6         | -1.0 | -1.2 | -1.1  | -1.1  | YML025C |        |     |      |      |      | Ribosomal protein, mitochondrial (by homology)                          |
| CA5205 | orf19.7020  | KEX1         | -1.2 | 1.1  | -1.0  | 1.1   | YGL203C | KEX1   | 1.0 | -1.3 | -1.2 | 1.0  | Carboxypeptidase-alpha (by homology)                                    |
| CA5206 | orf19.7021  | GPH1         | 1.0  | -1.0 | 1.3   | 1.4   | YPR160W | GPH1   | 1.0 | 1.0  | -1.3 | -1.3 | Glycogen phosphorylase (by homology)                                    |
| CA5208 | orf19.7023  | IPF2361      | -1.1 | 1.0  | 1.0   | 1.0   | YLR455W |        | 1.0 | -1.5 | -2.3 | -2.4 | unknown function                                                        |
| CA5209 | orf19.7025  | MCM1         | 1.0  | -1.0 | 1.2   | 1.0   | YMR043W | MCM1   | 1.0 | -1.2 | 1.1  | 1.2  | Transcription factor of the MADS box (by homology)                      |
| CA5212 | orf19.7029  | IPF3050      | 1.1  | 1.0  | 1.0   | 1.0   | YDL238C |        | 1.0 | -2.1 | -1.8 | -1.4 | unknown function                                                        |
| CA5213 | orf19.7030  | SSR1         | 1.4  | 1.2  | 1.5   | 1.1   | YLR390W | ECM19  | 1.0 | 1.2  | 1.4  | 1.4  | Secretory Stress Response protein 1 (by homology)                       |
| CA5215 | orf19.7033  | PPS1         | 1.0  | 1.1  | 1.0   | 1.1   | YBR276C | PPS1   | 1.0 | 1.5  | -1.1 | 1.1  | protein tyrosine phosphatase (by homology)                              |
| CA5217 | orf19.7035  | RFC2         | 1.1  | 1.0  | 1.0   | 1.0   | YJR068W | RFC2   | 1.0 | 1.0  | 1.1  | -1.1 | Replication factor (by homology)                                        |
| CA5218 | orf19.7036  | WHI2         | -1.1 | -1.1 | -1.1  | -1.1  | YOR043W | WHI2   | 1.0 | -1.5 | -1.2 | -1.2 | Growth regulation factor (by homology)                                  |
| CA5219 | orf19.7037  | YAE1         | 1.0  | -1.2 | 1.1   | 1.0   | YJR067C | YAE1   | 1.0 | -1.2 | -1.4 | -1.5 | Essential protein                                                       |
| CA5220 | orf19.7038  | ≠V1P1.EXON2  | 1.1  | 1.0  | -1.0  | 1.0   | YMR004W | MVP1   | 1.0 | 1.0  | 1.0  | 1.0  | Required for vacuolar protein sorting, exon 2 (by homology)             |
| CA5222 | orf19.7041  | IPF3079      | -1.1 | -1.2 | -1.2  | -1.3  | YAL043C | PTA1   | 1.0 | -1.2 | -1.1 | -1.1 | similar to Saccharomyces cerevisiae Pta1p pre-tRNA processing protein   |
| CA5224 | orf19.7043  | IPF3081      | 1.0  | 1.1  | 1.0   | -1.0  | YLR050C |        | 1.0 | -1.0 | -1.4 | -1.3 | unknown function                                                        |
| CA5225 | orf19.7044  | ACB1.EXON2   | 1.1  | -1.0 | 1.0   | 1.0   | YGR037C | ACB1   | 1.0 | 1.2  | 1.3  | 1.2  | acyl-coenzyme-A-binding protein, exon 2 (by homology)                   |
| CA5226 | orf19.7044  | RIM15        | 1.0  | -1.2 | -1.1  | -1.0  | YFL033C | RIM15  | 1.0 | -2.3 | -2.5 | -2.3 | Protein kinase involved in the RIM pathway (by homology)                |
| CA5227 | orf19.7046  | IPF3087      | 1.1  | -1.3 | -1.2  | -1.1  | YIR017C | MET28  | 1.0 | -1.1 | -1.1 | -1.0 | unknown function                                                        |



|        |            |                   |      |      |      |      |         |               |     |      |      |      |                                                                                |
|--------|------------|-------------------|------|------|------|------|---------|---------------|-----|------|------|------|--------------------------------------------------------------------------------|
| CA5228 | orf19.7047 | <i>RTF1.3EOC</i>  | -1.2 | -1.3 | -1.1 | -1.2 | YGL244W | <i>RTF1</i>   | 1.0 | 1.1  | 1.1  | 1.2  | Regulates DNA binding properties of TBP, 3-prime end (by homology)             |
| CA5229 | orf19.5035 | <i>IPF10425</i>   | -1.0 | 1.0  | -1.1 | -1.0 | YBR215W | <i>HPC2</i>   | 1.0 | 1.2  | 1.1  | 1.2  | unknown function                                                               |
| CA5230 | orf19.5034 | <i>IPF10424</i>   | 1.1  | -1.1 | -1.0 | -1.0 | YBR216C |               | 1.0 | -1.3 | -1.6 | -1.3 | unknown function                                                               |
| CA5231 | orf19.5033 | <i>IPF10422</i>   | 1.1  | 1.1  | 1.0  | 1.1  | YBR217W | <i>APG12</i>  | 1.0 | 1.4  | 1.1  | 1.1  | Similar to APG12, component of the autophagic system                           |
| CA5233 | orf19.5031 | <i>SSK1</i>       | 1.1  | 1.0  | -1.0 | -1.0 | YLR006C | <i>SSK1</i>   | 1.0 | -1.1 | 1.1  | 1.3  | Putative reponse regulator two-component phosphorelay gene                     |
| CA5234 | orf19.5030 | <i>IPF3014</i>    | -1.1 | -1.3 | -1.3 | -1.2 | YDR068W | <i>DOS2</i>   | 1.0 | -1.4 | -1.1 | -1.1 | weak similarity to <i>S. cerevisiae</i> DOS2 involved in genome stability      |
| CA5235 | orf19.5029 | <i>IPF3015</i>    | -1.2 | -1.3 | -1.2 | -1.2 | YDR061W |               | 1.0 | -1.3 | -1.2 | -1.1 | Similar to <i>E.coli</i> modF and photorepair protein phrA                     |
| CA5236 | orf19.5027 | <i>LCB2</i>       | 1.2  | 1.1  | 1.4  | 1.3  | YDR062W | <i>LCB2</i>   | 1.0 | 1.0  | 1.2  | 1.7  | Palmitoyl transferase (by homology)                                            |
| CA5237 | orf19.5026 | <i>ZMS1</i>       | 1.0  | -1.2 | -1.2 | -1.2 | YML081W |               | 1.0 | 1.0  | 1.3  | 1.8  | Zinc Finger Protein C2H2 (by homology)                                         |
| CA5238 | orf19.5025 | <i>MET3</i>       | -1.0 | 1.1  | 1.3  | 1.1  | YJR010W | <i>MET3</i>   | 1.0 | -1.3 | -1.5 | -1.4 | ATP sulfurylase                                                                |
| CA5239 | orf19.5024 | <i>GND1</i>       | -1.1 | -1.2 | 1.1  | -1.1 | YHR183W | <i>GND1</i>   | 1.0 | 1.5  | 1.1  | 1.3  | 6-phosphogluconate dehydrogenase                                               |
| CA5242 | orf19.5021 | <i>PDX1</i>       | -1.3 | -1.1 | -1.4 | -1.3 | YGR193C | <i>PDX1</i>   | 1.0 | -1.1 | 1.1  | 1.1  | Pyruvate dehydrogenase complex protein X (by homology)                         |
| CA5247 | orf19.5015 | <i>MYO2</i>       | -1.5 | 1.0  | -1.1 | -1.0 | YOR326W | <i>MYO2</i>   | 1.0 | -1.5 | -1.1 | -1.2 | Myosin heavy chain (by homology)                                               |
| CA5248 | orf19.5014 | <i>IPF1828</i>    | -1.0 | -1.1 | -1.1 | 1.1  | YGL085W |               | 1.0 | 1.0  | 1.1  | -1.1 | unknown function                                                               |
| CA5249 | orf19.5013 | <i>PCM1</i>       | -1.2 | -1.3 | -1.3 | -1.2 | YEL058W | <i>PCM1</i>   | 1.0 | 1.2  | 1.5  | 1.6  | phosphoacetylglucosamine mutase (by homology)                                  |
| CA5251 | orf19.5011 | <i>IPF1824</i>    | 1.1  | 1.0  | -1.1 | 1.1  | YPL269W | <i>KAR9</i>   | 1.0 | -1.1 | -1.1 | -1.1 | unknown function                                                               |
| CA5252 | orf19.5010 | <i>DIM1</i>       | 1.0  | -1.1 | -1.0 | 1.0  | YPL266W | <i>DIM1</i>   | 1.0 | -1.3 | -1.2 | -1.3 | rRNA (adenine-N6,N6)-dimethyltransferase (by homology)                         |
| CA5253 | orf19.5009 | <i>KEL3</i>       | -1.0 | -1.0 | -1.0 | 1.0  | YPL263C | <i>KEL3</i>   | 1.0 | 1.1  | 1.4  | 1.7  | Kelch-repeat protein                                                           |
| CA5254 |            | <i>IPF1820</i>    | 1.0  | 1.0  | 1.0  | 1.0  | YDR016C | <i>DAD1</i>   | 1.0 | -1.2 | -1.4 | -1.5 | unknown function                                                               |
| CA5255 | orf19.5007 | <i>ACT1</i>       | -1.1 | -1.0 | 1.1  | 1.1  | YFL039C | <i>ACT1</i>   | 1.0 | 1.2  | 1.6  | 1.8  | actin (by homology)                                                            |
| CA5257 |            | <i>SNC2.EXON2</i> | 1.2  | 1.5  | 1.8  | 1.5  | YOR327C | <i>SNC2</i>   | 1.0 | 1.2  | 1.3  | 1.1  | Strong similarity to synaptobrevin, exon 2 (by homology)                       |
| CA5258 | orf19.5006 | <i>GCV3</i>       | 1.0  | -1.2 | -1.1 | -1.0 | YAL044C | <i>GCV3</i>   | 1.0 | -1.5 | -2.0 | -2.0 | Glycine decarboxylase, subunit H (by homology)                                 |
| CA5260 | orf19.5004 | <i>RAD54</i>      | -1.0 | 1.1  | 1.0  | 1.0  | YGL163C | <i>RAD54</i>  | 1.0 | -1.5 | -1.5 | -1.4 | DNA-dependent ATPase of the Snf2p family (by homology)                         |
| CA5261 | orf19.5003 | <i>IPF1805</i>    | -1.3 | -1.3 | -1.4 | -1.2 | YGL164C |               | 1.0 | 1.1  | 1.3  | 1.1  | unknown function                                                               |
| CA5262 | orf19.5001 | <i>IPF1804</i>    | -1.3 | -1.4 | -1.5 | -1.3 | YGL166W | <i>CUP2</i>   | 1.0 | -1.2 | -1.5 | -2.1 | putative transcription factor (by homology)                                    |
| CA5263 | orf19.5000 | <i>CYB3</i>       | -1.2 | -3.2 | -2.7 | -2.5 | YML054C | <i>CYB2</i>   | 1.0 | 1.1  | 1.2  | -1.7 | Lactate dehydrogenase cytochrome b2 (by homology)                              |
| CA5266 | orf19.4996 | <i>IPF1787.3F</i> | -1.1 | 1.0  | 1.1  | -1.1 | YBL029W |               | 1.0 | -1.3 | -1.5 | -1.4 | unknown function, 3-prime end                                                  |
| CA5268 | orf19.4994 | <i>SEC18.3F</i>   | -1.0 | -1.1 | -1.0 | 1.1  | YBR080C | <i>SEC18</i>  | 1.0 | 1.0  | 1.0  | -1.0 | vesicular fusion protein, 3-prime end (by homology)                            |
| CA5271 | orf19.4991 | <i>IPF1777</i>    | -1.0 | -1.1 | -1.0 | -1.0 | YGL178W | <i>MPT5</i>   | 1.0 | -1.3 | -1.1 | -1.4 | similar to <i>Saccharomyces cerevisiae</i> Mpt5p multicopy suppressor of Pop   |
| CA5273 | orf19.4987 | <i>NUP49</i>      | -1.1 | -1.1 | -1.2 | -1.1 | YGL172W | <i>NUP49</i>  | 1.0 | -1.3 | -1.1 | 1.0  | nuclear pore protein (by homology)                                             |
| CA5274 | orf19.4985 | <i>IPF1764</i>    | 1.2  | -1.5 | -1.3 | -1.3 | YGL084C | <i>GUP1</i>   | 1.0 | -1.2 | -1.0 | -1.2 | similar to <i>Saccharomyces cerevisiae</i> Gup1p glycerol transporter (by hom  |
| CA5279 | orf19.7128 | <i>SYS1</i>       | 1.1  | 1.0  | 1.1  | -1.1 | YJL004C | <i>SYS1</i>   | 1.0 | -1.1 | -1.2 | -1.2 | Similar to ypt6 suppressor in <i>S. cerevisiae</i> (by homology)               |
| CA5280 | orf19.7131 | <i>IPF1899</i>    | 1.2  | -1.0 | 1.0  | -1.0 | YHL021C |               | 1.0 | 1.4  | 1.6  | 1.1  | unknown function                                                               |
| CA5281 | orf19.7136 | <i>SPT6</i>       | 1.1  | 1.1  | -1.1 | -1.0 | YGR116W | <i>SPT6</i>   | 1.0 | -1.3 | -1.2 | -1.2 | Transcription elongation protein (by homology)                                 |
| CA5284 | orf19.7141 | <i>UFE1</i>       | -1.0 | 1.1  | -1.1 | 1.0  | YOR075W | <i>UFE1</i>   | 1.0 | -1.0 | 1.1  | -1.2 | Endoplasmic reticulum t-SNARE (by homology)                                    |
| CA5285 | orf19.7144 | <i>HBS1.3F</i>    | -1.1 | 1.0  | 1.2  | -1.0 | YKR084C | <i>HBS1</i>   | 1.0 | -1.8 | -1.6 | -1.3 | Translation elongation factor eEF-1 alpha chain homolog, 3-prime end (b        |
| CA5288 | orf19.7149 | <i>IPF1928</i>    | -1.2 | -1.4 | -1.4 | -1.4 | YMR258C |               | 1.0 | -1.1 | -1.2 | -1.3 | unknown function                                                               |
| CA5289 | orf19.7150 | <i>NRG1</i>       | -1.0 | 1.1  | -1.0 | 1.0  | YBR066C | <i>NRG2</i>   | 1.0 | -1.1 | -1.3 | -1.1 | similar to transcriptional repressor Nrg1p/Nrg2p                               |
| CA5291 | orf19.7153 | <i>LOS1</i>       | -1.4 | -1.3 | -1.3 | -1.1 | YKL205W | <i>LOS1</i>   | 1.0 | 1.1  | -1.1 | -1.3 | pre-tRNA splicing protein (by homology)                                        |
| CA5292 | orf19.7154 | <i>IPF1948</i>    | -1.0 | -1.4 | -1.4 | -1.3 | YJL069C |               | 1.0 | 1.1  | -1.1 | 1.3  | unknown function                                                               |
| CA5296 | orf19.7159 | <i>IPF1956</i>    | 1.0  | -1.3 | -1.7 | -1.3 | YMR185W |               | 1.0 | 1.2  | 1.1  | 1.1  | unknown function                                                               |
| CA5297 | orf19.7160 | <i>YAR1</i>       | 1.1  | 1.1  | -1.2 | 1.0  | YPL239W | <i>YAR1</i>   | 1.0 | 1.2  | 1.7  | 1.8  | Ankyrin repeat-containing protein (by homology)                                |
| CA5298 | orf19.7161 | <i>SUI3</i>       | -1.0 | 1.1  | -1.0 | -1.0 | YPL237W | <i>SUI3</i>   | 1.0 | 1.1  | 1.1  | 1.2  | Translation initiation factor eIF2 beta subunit (by homology)                  |
| CA5299 | orf19.7164 | <i>IPF2190</i>    | 1.0  | 1.0  | 1.0  | -1.0 | YPL236C |               | 1.0 | -1.2 | -1.4 | -1.5 | putative serine/threonine protein kinase (by homology)                         |
| CA5305 | orf19.7175 | <i>IPF2175</i>    | -1.0 | -1.0 | -1.2 | -1.0 | YMR161W | <i>HLJ1</i>   | 1.0 | -1.5 | -1.7 | -1.3 | similar to <i>Saccharomyces cerevisiae</i> Hlj1p dnaJ-type protein (by homolo  |
| CA5306 | orf19.7176 | <i>NPT1</i>       | -1.0 | -1.0 | -1.1 | 1.0  | YOR209C | <i>NPT1</i>   | 1.0 | 1.0  | 1.3  | 1.7  | Nicotinate phosphoribosyltransferase (by homology)                             |
| CA5307 | orf19.7177 | <i>IPF2172</i>    | -1.1 | 1.1  | 1.6  | 1.2  | YPL125W | <i>KAP120</i> | 1.0 | -1.2 | -1.1 | -1.2 | similar to <i>Saccharomyces cerevisiae</i> Kap120 nuclear transport factor, me |
| CA5308 | orf19.7178 | <i>PRE5</i>       | 1.1  | 1.1  | 1.0  | 1.1  | YMR314W | <i>PRE5</i>   | 1.0 | -1.0 | 1.2  | 1.2  | 20S proteasome subunit alpha6 (by homology)                                    |
| CA5311 | orf19.7182 | <i>IPF2166</i>    | 1.1  | 1.0  | 1.1  | 1.0  | YGL232W |               | 1.0 | 1.0  | -1.1 | -1.0 | unknown function                                                               |
| CA5312 | orf19.7183 | <i>IPF2165</i>    | 1.1  | 1.0  | 1.1  | 1.1  | YGL231C |               | 1.0 | 1.2  | 1.2  | 1.2  | unknown function                                                               |
| CA5315 | orf19.7186 | <i>CYB2</i>       | -1.1 | 1.0  | 1.1  | -1.0 | YLR210W | <i>CLB4</i>   | 1.0 | -1.3 | -1.3 | -1.2 | B-type cyclin                                                                  |
| CA5316 | orf19.7187 | <i>MAM33</i>      | 1.3  | -1.5 | -1.4 | -1.4 | YIL070C | <i>MAM33</i>  | 1.0 | -1.2 | -1.2 | -1.5 | Mitochondrial acidic matrix protein (by homology)                              |
| CA5318 | orf19.7190 | <i>OGG1</i>       | 1.0  | -1.0 | 1.1  | -1.1 | YML060W | <i>OGG1</i>   | 1.0 | -2.1 | -2.0 | -2.1 | 8-oxoguanine DNA glycosylase (by homology)                                     |
| CA5319 | orf19.7193 | <i>IPF2150</i>    | -1.2 | -1.2 | -1.3 | -1.1 | YKL124W | <i>SSH4</i>   | 1.0 | -1.4 | -1.2 | -1.3 | similar to protein involved in ER function                                     |
| CA5321 | orf19.7195 | <i>RAD6.3</i>     | 1.1  | -1.0 | 1.1  | -1.0 | YGL058W | <i>RAD6</i>   | 1.0 | 1.0  | -1.2 | -1.0 | Ubiquitin protein ligase, 3-prime end                                          |
| CA5322 | orf19.7196 | <i>PRB1</i>       | 1.3  | 1.9  | 3.2  | 2.7  | YEL060C | <i>PRB1</i>   | 1.0 | 1.1  | 1.3  | 1.1  | Protease B, vacuolar (by homology)                                             |
| CA5323 | orf19.7197 | <i>IPF2142</i>    | -1.2 | -1.3 | -1.2 | -1.2 | YLR002C | <i>NOC3</i>   | 1.0 | -1.1 | 1.1  | 1.3  | unknown function                                                               |
| CA5324 | orf19.7198 | <i>IPF2140</i>    | -1.0 | 1.0  | 1.1  | 1.0  | YNL288W | <i>CAF40</i>  | 1.0 | -1.0 | -1.1 | -1.1 | unknown function                                                               |
| CA5325 | orf19.7199 | <i>IPF2138</i>    | 1.0  | -1.0 | -1.1 | -1.1 | YBR137W |               | 1.0 | 1.3  | 1.1  | 1.1  | unknown function                                                               |
| CA5327 | orf19.7201 | <i>SLA2</i>       | -1.3 | -1.2 | -1.4 | -1.2 | YNL243W | <i>SLA2</i>   | 1.0 | -1.2 | -1.1 | -1.0 | Cytoskeleton assembly control protein                                          |
| CA5328 | orf19.7202 | <i>RER1</i>       | -1.1 | -1.0 | 1.1  | -1.0 | YCL001W | <i>RER1</i>   | 1.0 | 1.2  | 1.2  | 1.1  | Required for correct localization of Sec12p (by homology)                      |



|        |            |                  |      |      |      |      |         |               |     |      |      |      |                                                                           |
|--------|------------|------------------|------|------|------|------|---------|---------------|-----|------|------|------|---------------------------------------------------------------------------|
| CA5329 | orf19.7203 | <i>MRP7</i>      | -1.1 | -1.2 | -1.1 | -1.1 | YNL005C | <i>MRP7</i>   | 1.0 | 1.1  | 1.0  | -1.1 | Mitochondrial ribosomal protein YmL2 precursor (by homology)              |
| CA5330 | orf19.7204 | <i>IPF2130</i>   | 1.1  | 1.0  | -1.0 | -1.1 | YJR149W |               | 1.0 | -1.2 | -1.2 | -1.2 | similar to 2-nitropropane dioxygenases                                    |
| CA5332 | orf19.7206 | <i>IPF900.3</i>  | 1.0  | -1.0 | 1.0  | -1.0 | YDR067C |               | 1.0 | 1.2  | 1.3  | 1.2  | unknown function, , 3-prime end                                           |
| CA5333 | orf19.7207 | <i>DOA4</i>      | -1.1 | 1.4  | 1.5  | 1.2  | YDR069C | <i>DOA4</i>   | 1.0 | -1.1 | 1.1  | 1.6  | ubiquitin-specific isopeptidase (by homology)                             |
| CA5334 | orf19.7208 | <i>SMK1</i>      | -1.0 | 1.1  | -1.0 | 1.0  | YPR054W | <i>SMK1</i>   | 1.0 | -1.0 | -1.1 | -1.1 | MAP kinase (by homology)                                                  |
| CA5336 | orf19.7210 | <i>IPF893</i>    | -1.0 | 1.1  | 1.0  | -1.0 | YJR008W |               | 1.0 | 1.6  | 1.3  | 1.1  | unknown function                                                          |
| CA5337 | orf19.7212 | <i>APL1</i>      | -1.0 | 1.0  | 1.1  | 1.0  | YJR005W | <i>APL1</i>   | 1.0 | -2.1 | -1.6 | -1.4 | AP-2 complex subunit, beta2-adaptin (by homology)                         |
| CA5338 | orf19.7213 | <i>IPF889</i>    | -1.0 | 1.1  | 1.0  | -1.1 | YDR291W |               | 1.0 | -1.2 | -1.3 | -1.3 | ATP-dependent RNA helicase (by homology)                                  |
| CA5339 | orf19.7214 | <i>IPF885</i>    | 1.1  | 1.0  | 1.1  | 1.0  | YBR056W |               | 1.0 | -1.2 | -1.2 | -1.2 | glucan 1,3-beta-glucosidase (by homology)                                 |
| CA5340 | orf19.7215 | <i>IPF883</i>    | 1.0  | -1.1 | -1.1 | -1.1 | YJL109C |               | 1.0 | -1.1 | -1.0 | 1.3  | unknown function                                                          |
| CA5341 |            | <i>HSP10.3</i>   | 1.1  | 1.0  | 1.0  | 1.1  | YOR020C | <i>HSP10</i>  | 1.0 | -1.1 | -1.2 | -1.2 | 10 kDa mitochondrial heat shock chaperonin, 3-prime end (by homology)     |
| CA5342 | orf19.7216 | <i>YPT521</i>    | -1.0 | -1.0 | 1.0  | 1.0  | YKR014C | <i>YPT52</i>  | 1.0 | 1.1  | 1.4  | 1.2  | GTP-binding protein of the rab/ypt family (by homology)                   |
| CA5343 | orf19.7217 | <i>RPL4B</i>     | -1.1 | 1.1  | 1.0  | -1.0 | YDR012W | <i>RPL4B</i>  | 1.0 | 1.8  | 2.7  | 3.0  | Ribosomal protein L4B (by homology)                                       |
| CA5344 | orf19.7218 | <i>PRY2</i>      | 1.1  | 1.0  | 1.2  | 1.0  | YJL079C | <i>PRY1</i>   | 1.0 | -1.3 | -1.1 | -1.1 | putative pathogen related proteins (by homology)                          |
| CA5345 | orf19.7219 | <i>FTR1</i>      | 1.1  | 1.1  | 1.2  | 1.0  | YER145C | <i>FTR1</i>   | 1.0 | 1.2  | 1.1  | 1.3  | high affinity iron permease                                               |
| CA5346 | orf19.7221 | <i>IPF867</i>    | -1.0 | -1.5 | -1.9 | -1.6 | YKR029C |               | 1.0 | -1.4 | -1.4 | -1.5 | unknown function                                                          |
| CA5347 | orf19.7222 | <i>IPF864</i>    | 1.1  | 1.1  | 1.0  | 1.1  | YJL104W | <i>MIA1</i>   | 1.0 | -1.2 | -1.3 | -1.3 | unknown function                                                          |
| CA5348 | orf19.7223 | <i>IPF863</i>    | -1.1 | -1.1 | -1.1 | -1.1 | YBR030W |               | 1.0 | 1.2  | 1.3  | 1.3  | involved in inositol biosynthesis (by homology)                           |
| CA5349 | orf19.7224 | <i>IPF861</i>    | -1.2 | 1.1  | 1.2  | 1.2  | YKR017C |               | 1.0 | -1.1 | -1.2 | -1.1 | unknown function                                                          |
| CA5351 | orf19.7227 | <i>IPF857</i>    | 1.0  | -1.0 | 1.0  | -1.0 | YFR003C |               | 1.0 | -1.1 | -1.1 | -1.8 | unknown function                                                          |
| CA5352 | orf19.7228 | <i>IPF856</i>    | 1.1  | 1.3  | 1.8  | 1.4  | YKR030W |               | 1.0 | -1.1 | -1.1 | 1.1  | unknown function                                                          |
| CA5353 | orf19.7229 | <i>IML2</i>      | -1.1 | 1.7  | 1.7  | 1.4  | YKR018C |               | 1.0 | -1.2 | -1.3 | -1.3 | unknown function                                                          |
| CA5356 | orf19.7233 | <i>IRR1.5F</i>   | -1.1 | -1.0 | -1.2 | -1.1 | YIL026C | <i>IRR1</i>   | 1.0 | -1.3 | -1.3 | -1.1 | cohesin complex subunit, 5-prime end (by homology)                        |
| CA5357 | orf19.7234 | <i>RSC8</i>      | -1.0 | -1.2 | -1.2 | -1.1 | YFR037C | <i>RSC8</i>   | 1.0 | -1.0 | 1.3  | 1.4  | chromatin remodeling complex subunit (by homology)                        |
| CA5358 | orf19.7235 | <i>IPF846</i>    | -1.1 | 1.3  | 1.1  | 1.1  | YMR102C |               | 1.0 | -1.3 | -1.2 | -1.2 | WD-repeat protein, beta-transducin (by homology)                          |
| CA5359 | orf19.7236 | <i>TIF35</i>     | 1.0  | -1.1 | -1.3 | -1.1 | YDR429C | <i>TIF35</i>  | 1.0 | 1.2  | 1.6  | 1.9  | translation initiation factor eIF3, p33 subunit (by homology)             |
| CA5360 | orf19.7237 | <i>IPF839</i>    | 1.1  | 1.1  | 1.2  | 1.0  | YDR428C |               | 1.0 | -1.1 | -1.1 | 1.0  | unknown function                                                          |
| CA5361 | orf19.7238 | <i>NPL3</i>      | -1.1 | 1.2  | 1.2  | 1.1  | YDR432W | <i>NPL3</i>   | 1.0 | 1.3  | 2.0  | 2.6  | nucleolar shuttling protein with an RNA recognition motif (by homology)   |
| CA5362 | orf19.7239 | <i>IPF836.3</i>  | -1.2 | -1.4 | -1.5 | -1.4 | YHR146W | <i>CRP1</i>   | 1.0 | 1.0  | 1.2  | 1.2  | regulation of G-protein function, 3-prime end (by homology)               |
| CA5363 | orf19.7242 | <i>NCR1</i>      | -1.1 | -1.1 | -1.1 | -1.1 | YPL006W | <i>NCR1</i>   | 1.0 | -1.3 | -1.8 | -1.7 | Polytopic membrane protein involved in sterol homeostasis and trafficking |
| CA5364 | orf19.7243 | <i>DCD1</i>      | 1.1  | 1.0  | 1.0  | 1.1  | YHR144C | <i>DCD1</i>   | 1.0 | 1.0  | 1.9  | 1.2  | deoxycytidylate deaminase (by homology)                                   |
| CA5365 | orf19.7244 | <i>IPF824</i>    | 1.3  | -1.3 | -1.4 | -1.2 | YNL168C |               | 1.0 | -1.1 | 1.1  | 1.1  | 2-hydroxyhepta-2,4-diene-1,7-dioate isomerase (by homology)               |
| CA5366 | orf19.7245 | <i>IPF823</i>    | 1.1  | -1.0 | 1.0  | 1.0  | YDL033C |               | 1.0 | 1.2  | -1.2 | -1.1 | tRNA (5-methylaminomethyl-2-thiouridylate)-methyltransferase (by homo     |
| CA5367 | orf19.7247 | <i>RIM101</i>    | 1.1  | 1.0  | 1.1  | 1.0  | YHL027W | <i>RIM101</i> | 1.0 | -1.1 | 1.2  | 1.1  | Zn finger transcription factor homolog                                    |
| CA5369 | orf19.7251 | <i>WSC4</i>      | 1.0  | 1.2  | 1.2  | 1.1  | YHL028W | <i>WSC4</i>   | 1.0 | -1.2 | 1.0  | 1.0  | Cell wall integrity by homology                                           |
| CA5370 | orf19.7254 | <i>IPF5248</i>   | 1.0  | 1.0  | -1.1 | -1.0 | YPL005W |               | 1.0 | -1.4 | -1.6 | -1.5 | unknown function                                                          |
| CA5371 | orf19.7255 | <i>RPC10</i>     | -1.0 | 1.0  | -1.0 | -1.0 | YHR143W |               | 1.0 | -1.2 | 1.1  | 1.2  | DNA-directed RNA polymerases small subunit by homology                    |
| CA5372 | orf19.7257 | <i>MLH3</i>      | 1.0  | -1.0 | -1.0 | -1.1 | YPL164C | <i>MLH3</i>   | 1.0 | 1.1  | 1.1  | -1.0 | DNA mismatch repair by homology                                           |
| CA5373 | orf19.7256 | <i>IPF5243</i>   | 1.1  | 1.0  | 1.1  | 1.1  | YER146W | <i>LSM5</i>   | 1.0 | -1.2 | -1.0 | -1.7 | snRNP (by homology)                                                       |
| CA5374 | orf19.7258 | <i>DDI1</i>      | 1.0  | 1.1  | 1.3  | 1.0  | YER143W | <i>DDI1</i>   | 1.0 | -1.3 | 1.1  | -1.2 | Response to DNA alkylation by homology                                    |
| CA5376 | orf19.7261 | <i>GDI1</i>      | 1.1  | 1.0  | 1.0  | 1.0  | YER136W | <i>GDI1</i>   | 1.0 | -1.1 | 1.3  | 1.3  | GDP dissociation inhibitor by homology                                    |
| CA5377 | orf19.7263 | <i>IPF5234</i>   | -1.0 | -1.0 | -1.0 | -1.1 | YFR006W |               | 1.0 | 1.2  | 1.6  | 1.2  | X-Pro dipeptidase (by homology)                                           |
| CA5378 | orf19.7264 | <i>MPR1</i>      | 1.1  | 1.0  | 1.1  | -1.0 | YFR004W | <i>RPN11</i>  | 1.0 | 1.1  | 1.3  | 1.0  | 26S proteasome regulatory subunit by homology                             |
| CA5379 | orf19.7265 | <i>IPF5228.5</i> | 1.0  | 1.0  | 1.1  | 1.1  | YFR005C | <i>SAD1</i>   | 1.0 | -1.1 | -1.1 | -1.1 | similar to Saccharomyces cerevisiae Sad1p snRNP assembly factor req       |
| CA5381 | orf19.7269 | <i>IPF5222</i>   | 1.3  | 1.1  | 1.1  | 1.1  | YDR071C |               | 1.0 | 1.1  | 1.5  | 1.3  | arylalkylamine n-acetyltransferase (by homology)                          |
| CA5388 | orf19.8545 | <i>PET9</i>      | 1.1  | -1.1 | 1.0  | -1.1 | YBL030C | <i>PET9</i>   | 1.0 | -2.1 | -2.7 | -4.4 | ADP/ATP carrier protein (by homology)                                     |
| CA5396 | orf19.939  | <i>NAM7</i>      | -1.2 | -1.1 | -1.1 | -1.1 | YMR080C | <i>NAM7</i>   | 1.0 | -1.4 | -1.2 | -1.2 | nonsense-mediated mRNA decay protein (by homology)                        |
| CA5397 | orf19.940  | <i>IPF9663</i>   | -1.2 | -1.0 | -1.2 | -1.1 | YKL092C | <i>BUD2</i>   | 1.0 | -1.4 | -1.4 | -1.4 | similar to Saccharomyces cerevisiae Bud2p GTPase-activating protein fc    |
| CA5398 | orf19.941  | <i>SEC14</i>     | -1.0 | -1.2 | -1.1 | -1.0 | YMR079W | <i>SEC14</i>  |     |      |      |      | phosphatidylinositol(PI)/phosphatidylcholine(PC) transfer                 |
| CA5403 | orf19.945  | <i>IPF1542</i>   | -1.1 | -1.0 | -1.1 | -1.1 | YKL002W | <i>DID4</i>   | 1.0 | -1.4 | -1.5 | -1.7 | unknown function                                                          |
| CA5404 | orf19.946  | <i>MET14</i>     | 1.0  | 1.1  | 1.0  | 1.1  | YKL001C | <i>MET14</i>  | 1.0 | -1.4 | 1.0  | 1.3  | Adenylylsulfate kinase (by homology)                                      |
| CA5405 | orf19.947  | <i>MRP17</i>     | 1.0  | 1.0  | -1.0 | 1.1  | YKL003C | <i>MRP17</i>  | 1.0 | -1.3 | -1.4 | -1.5 | Mitochondrial ribosomal protein (by homology)                             |
| CA5409 |            | <i>COF1</i>      | 1.2  | 1.2  | 1.3  | 1.3  | YLL050C | <i>COF1</i>   | 1.0 | -2.3 | -2.5 | -2.9 | cofilin (by homology)                                                     |
| CA5410 | orf19.954  | <i>IPF1557</i>   | -1.1 | -1.1 | -1.2 | -1.0 | YLR090W | <i>XDJ1</i>   | 1.0 | -1.2 | -1.4 | -1.3 | similar to dnaJ proteins                                                  |
| CA5412 | orf19.956  | <i>IPF1566</i>   | -1.1 | -1.1 | -1.1 | -1.1 | YLR087C | <i>CSF1</i>   | 1.0 | -1.6 | -1.3 | -1.1 | unknown function                                                          |
| CA5413 |            | <i>IPF1567</i>   | 1.2  | 1.1  | 1.1  | 1.2  | YDR115W |               | 1.0 | -1.6 | -1.7 | -1.9 | mitochondrial ribosomal protein L34 (by homology)                         |
| CA5414 | orf19.962  | <i>IPF1568</i>   | 1.0  | -1.0 | -1.1 | -1.0 | YDR156W | <i>RPA14</i>  | 1.0 | -1.2 | -1.1 | -1.4 | unknown function                                                          |
| CA5415 | orf19.964  | <i>SMC4</i>      | -1.0 | -1.1 | -1.3 | -1.1 | YLR086W | <i>SMC4</i>   | 1.0 | -1.1 | 1.3  | 1.4  | Stable Maintenance of Chromosomes (by homology)                           |
| CA5416 | orf19.966  | <i>IPF1576</i>   | -1.0 | -1.0 | -1.0 | -1.1 | YLR405W |               | 1.0 | -1.6 | -1.9 | -1.7 | unknown function                                                          |
| CA5417 | orf19.967  | <i>NUC1</i>      | 1.0  | 1.0  | 1.1  | -1.0 | YJL208C | <i>NUC1</i>   | 1.0 | -1.4 | -1.1 | -1.2 | Nuclease, mitochondrial                                                   |
| CA5418 | orf19.968  | <i>IPF1580</i>   | 1.1  | 1.5  | 1.7  | 1.7  | YNL190W |               | 1.0 | 1.1  | 1.6  | 3.4  | unknown function                                                          |

|        |            |                   |      |      |      |      |         |              |     |      |      |      |                                                                                                                       |
|--------|------------|-------------------|------|------|------|------|---------|--------------|-----|------|------|------|-----------------------------------------------------------------------------------------------------------------------|
| CA5419 | orf19.969  | <i>PRS1</i>       | -1.1 | -1.1 | 1.1  | 1.0  | YKL181W | <i>PRS1</i>  | 1.0 | 1.8  | 2.3  | 3.1  | Ribose-phosphate pyrophosphokinase                                                                                    |
| CA5420 | orf19.970  | <i>IPF1583</i>    | 1.0  | -1.0 | 1.0  | -1.1 | YLR412W |              | 1.0 | -1.0 | 1.2  | 1.3  | unknown function                                                                                                      |
| CA5421 | orf19.971  | <i>SKN7</i>       | 1.0  | 1.0  | 1.1  | 1.0  | YHR206W | <i>SKN7</i>  | 1.0 | -1.1 | -1.1 | 1.2  | Transcription factor (by homology)                                                                                    |
| CA5422 | orf19.972  | <i>IPF1588</i>    | 1.0  | 1.0  | -1.0 | -1.0 | YBR228W | <i>SLX1</i>  | 1.0 | 1.3  | 1.3  | 1.3  | unknown function                                                                                                      |
| CA5423 | orf19.974  | <i>ROT2</i>       | -1.2 | -1.2 | -1.3 | -1.2 | YBR229C | <i>ROT2</i>  | 1.0 | 1.2  | 1.1  | 1.1  | Glucosidase II, catalytic subunit (by homology)                                                                       |
| CA5424 | orf19.976  | <i>IPF1598</i>    | -1.3 | -1.3 | -1.6 | -1.3 | YDL074C | <i>BRE1</i>  | 1.0 | -1.3 | -1.3 | -1.2 | unknown function                                                                                                      |
| CA5425 | orf19.978  | <i>BDF1</i>       | -1.2 | 1.0  | -1.1 | -1.1 | YLR399C | <i>BDF1</i>  | 1.0 | -1.3 | -1.5 | -1.5 | sporulation protein (by homology)                                                                                     |
| CA5426 | orf19.979  | <i>FAS1</i>       | -1.2 | -1.7 | -2.0 | -1.9 | YKL182W | <i>FAS1</i>  | 1.0 | 1.1  | 1.5  | 1.7  | Fatty-acyl-CoA synthase, beta chain.                                                                                  |
| CA5428 | orf19.3230 | <i>BOI2</i>       | -1.1 | -1.1 | -1.2 | -1.0 | YER114C | <i>BOI2</i>  | 1.0 | -1.2 | -1.5 | -1.7 | budding protein (by homology)                                                                                         |
| CA5429 | orf19.3231 | <i>CDC27</i>      | -1.0 | 1.1  | -1.0 | 1.1  | YBL084C | <i>CDC27</i> | 1.0 | 1.3  | 1.4  | 1.2  | subunit of anaphase-promoting complex (by homology)                                                                   |
| CA5431 | orf19.3233 | <i>IPF195</i>     | 1.1  | 1.1  | 1.0  | -1.1 | YHL002W |              | 1.0 | 1.2  | 1.1  | 1.0  | unknown function                                                                                                      |
| CA5432 | orf19.3234 | <i>EBP5</i>       | 1.0  | -1.1 | -1.1 | -1.0 | YPL171C | <i>OYE3</i>  | 1.0 | -1.7 | -1.9 | -1.8 | NADPH dehydrogenase (by homology)                                                                                     |
| CA5434 | orf19.3235 | <i>IPF199</i>     | 1.1  | -1.0 | -1.1 | 1.2  | YKL007W | <i>CAP1</i>  | 1.0 | -1.5 | -1.3 | -1.5 | F-actin capping protein alpha subunit (by homology)                                                                   |
| CA5435 | orf19.3237 | <i>UFD4</i>       | -1.1 | 1.3  | 1.3  | 1.4  | YKL010C | <i>UFD4</i>  | 1.0 | -1.4 | -1.4 | -1.3 | ubiquitin fusion degradation protein (by homology)                                                                    |
| CA5436 | orf19.3239 | <i>CTF18</i>      | -1.0 | -1.0 | -1.1 | -1.0 | YMR078C | <i>CTF18</i> | 1.0 | -1.4 | -1.0 | -1.1 | chromosome transmission in mitosis and maintenance of telomere length                                                 |
| CA5437 | orf19.3240 | <i>ERG27</i>      | 1.1  | -1.1 | -1.2 | -1.1 | YLR100W | <i>ERG27</i> | 1.0 | 1.1  | 1.7  | 1.7  | 3-keto sterol reductase (by homology)                                                                                 |
| CA5438 | orf19.3241 | <i>IPF223</i>     | 1.0  | 1.0  | -1.2 | -1.0 | YDR128W |              | 1.0 | -1.5 | -1.2 | -1.1 | unknown function                                                                                                      |
| CA5439 | orf19.3242 | <i>TAF25</i>      | -1.0 | -1.0 | -1.2 | 1.0  | YDR167W | <i>TAF25</i> | 1.0 | -1.5 | -1.1 | 1.0  | transcription initiation factor TFIID subunit (by homology)                                                           |
| CA5440 | orf19.3243 | <i>SRP54</i>      | -1.2 | -1.1 | -1.1 | -1.2 | YPR088C | <i>SRP54</i> | 1.0 | 1.2  | 1.8  | 1.9  | 54 kD signal recognition particle subunit                                                                             |
| CA5441 | orf19.3244 | <i>IPF227</i>     | 1.0  | -1.1 | -1.2 | 1.0  | YHR116W |              | 1.0 | -1.7 | -1.0 | 1.1  | unknown function                                                                                                      |
| CA5444 | orf19.3247 | <i>IPF230</i>     | -1.3 | 1.0  | 1.2  | 1.2  | YJL207C |              | 1.0 | -1.8 | -1.9 | -2.0 | unknown function                                                                                                      |
| CA5446 | orf19.3249 | <i>LAG1</i>       | 1.3  | -1.0 | 1.3  | 1.0  | YHL003C | <i>LAG1</i>  | 1.0 | 1.1  | -1.1 | -1.1 | longevity-assurance protein (by homology)                                                                             |
| CA5447 | orf19.3250 | <i>IPF234</i>     | -1.0 | -1.0 | 1.1  | -1.0 | YKL012W | <i>PRP40</i> | 1.0 | -1.7 | -1.1 | -1.2 | similar to <i>Saccharomyces cerevisiae</i> Prp40p splicing factor (by homology)                                       |
| CA5448 | orf19.3251 | <i>RC19.EXON</i>  | 1.1  | 1.1  | 1.2  | 1.1  | YKL013C | <i>ARC19</i> | 1.0 | -1.4 | -1.4 | -1.9 | subunit of the Arp2/3 complex involved in the control of actin polymerization                                         |
| CA5449 | orf19.3252 | <i>DAL81</i>      | -1.1 | -1.2 | -1.2 | -1.1 | YIR023W | <i>DAL81</i> | 1.0 | -1.3 | -1.2 | -1.2 | Transcriptional activator for allantoin and GABA catabolic genes (by homology)                                        |
| CA5451 | orf19.3256 | <i>SLN1</i>       | -1.1 | -1.0 | -1.0 | 1.0  | YIL147C | <i>SLN1</i>  | 1.0 | -1.2 | -1.2 | -1.1 | Two-component signal transducer histidine kinase component                                                            |
| CA5452 | orf19.3259 | <i>SEC11</i>      | 1.1  | 1.1  | 1.0  | 1.0  | YIR022W | <i>SEC11</i> | 1.0 | 1.2  | 1.2  | 1.1  | signal peptidase subunit (by homology)                                                                                |
| CA5453 | orf19.3260 | <i>IPF256</i>     | 1.1  | 1.1  | 1.0  | -1.0 | YKL088W |              | 1.0 | -1.2 | -1.1 | -1.1 | control of gene expression (by homology)                                                                              |
| CA5457 | orf19.3265 | <i>TRM1</i>       | -1.1 | -1.0 | -1.1 | -1.1 | YDR120C | <i>TRM1</i>  | 1.0 | 1.2  | 1.9  | 1.9  | N2,N2-dimethylguanine tRNA methyltransferase (by homology)                                                            |
| CA5459 | orf19.3267 | <i>IPF276</i>     | -1.0 | -1.0 | -1.0 | 1.0  | YDR126W | <i>PSL10</i> | 1.0 | 1.1  | 1.1  | 1.2  | unknown function                                                                                                      |
| CA5460 | orf19.3268 | <i>IPF277</i>     | 1.3  | 1.3  | 1.3  | 1.3  | YKL056C |              | 1.0 | 1.4  | 1.6  | 2.3  | human IgE-dependent histamine-releasing factor homolog (by homology)                                                  |
| CA5464 | orf19.3273 | <i>IPF285.5F</i>  | 1.0  | 1.0  | 1.0  | 1.0  | YCR059C | <i>YIH1</i>  | 1.0 | 1.4  | 1.2  | 1.6  | unknown function, 5-prime end                                                                                         |
| CA5466 | orf19.3276 | <i>PWP2</i>       | -1.0 | 1.1  | -1.1 | -1.1 | YCR057C | <i>PWP2</i>  | 1.0 | 1.1  | -1.0 | 1.4  | periodic tryptophan protein (by homology)                                                                             |
| CA5467 | orf19.3278 | <i>GSY1</i>       | -1.0 | 2.3  | 2.7  | 3.0  | YFR015C | <i>GSY1</i>  | 1.0 | 1.5  | 2.3  | -1.1 | UDP glucose--starch glucosyltransferase, glycogen synthase (by homology)                                              |
| CA5469 | orf19.3281 | <i>IPF298</i>     | 1.0  | 1.0  | 1.0  | -1.0 | YER051W |              | 1.0 | -1.1 | -1.2 | -1.1 | unknown function                                                                                                      |
| CA5471 | orf19.3283 | <i>IPF302</i>     | -1.1 | -1.1 | -1.1 | -1.1 | YKL055C | <i>OAR1</i>  | 1.0 | -2.6 | -2.8 | -3.8 | short chain dehydrogenase/reductase (by homology)                                                                     |
| CA5473 | orf19.3286 | <i>IPF16947</i>   | 1.0  | -1.3 | -1.4 | -1.1 | YDR221W |              | 1.0 | -1.1 | -1.0 | 1.1  | unknown function                                                                                                      |
| CA5474 | orf19.3287 | <i>Y16944.3EO</i> | 1.0  | -1.4 | -1.2 | -1.1 | YMR014W | <i>BUD22</i> | 1.0 | 1.1  | 1.4  | 1.4  | unknown function, 3-prime end                                                                                         |
| CA5480 | orf19.5312 | <i>IPF8210</i>    | -1.0 | 1.0  | -1.0 | 1.0  | YNL103W | <i>MET4</i>  | 1.0 | 1.1  | 1.1  | 1.2  | unknown function                                                                                                      |
| CA5484 | orf19.5318 | <i>RAD1.3F</i>    | -1.2 | -1.1 | 1.1  | -1.0 | YPL022W | <i>RAD1</i>  | 1.0 | 1.2  | -1.1 | -1.0 | UV endonuclease, component of the nucleotide excision repairosome, 3-methylentetrahydrofolate reductase (by homology) |
| CA5487 | orf19.5321 | <i>MET12</i>      | -1.1 | 1.2  | 1.1  | 1.0  | YPL023C | <i>MET12</i> | 1.0 | 1.3  | 1.2  | 1.1  | unknown function                                                                                                      |
| CA5488 | orf19.5322 | <i>IPF810</i>     | 1.1  | 1.3  | 1.5  | 1.3  | YJL178C |              | 1.0 | -1.5 | -1.4 | -1.4 | unknown function                                                                                                      |
| CA5489 | orf19.5323 | <i>MDH12</i>      | 1.2  | -1.1 | 1.2  | -1.0 | YDL078C | <i>MDH3</i>  | 1.0 | -1.0 | -1.2 | -1.7 | mitochondrial malate dehydrogenase (by homology)                                                                      |
| CA5490 | orf19.5325 | <i>KIN3</i>       | -1.1 | -1.2 | -1.2 | -1.1 | YAR018C | <i>KIN3</i>  | 1.0 | 1.1  | 1.0  | 1.0  | G2-specific serine/threonine protein kinase (by homology)                                                             |
| CA5491 | orf19.5326 | <i>IPF798</i>     | 1.1  | 1.1  | 1.1  | 1.1  | YGL209W | <i>MIG2</i>  | 1.0 | 1.0  | 1.1  | 1.4  | transcriptional regulator (by homology)                                                                               |
| CA5493 | orf19.5333 | <i>GCN1.5F</i>    | 1.1  | 1.5  | 1.2  | 1.1  | YGL195W | <i>GCN1</i>  | 1.0 | 1.1  | -1.0 | 1.3  | translational activator, 5-prime end (by homology)                                                                    |
| CA5494 | orf19.5334 | <i>IPF85</i>      | 1.1  | 3.8  | 3.4  | 2.4  | YLR136C | <i>TIS11</i> | 1.0 | -1.1 | 1.0  | 1.2  | similar to <i>Saccharomyces cerevisiae</i> Tis11p tRNA-specific adenosine deaminase                                   |
| CA5495 | orf19.5335 | <i>SGS1</i>       | 1.0  | 1.1  | -1.1 | -1.0 | YMR190C | <i>SGS1</i>  | 1.0 | -1.6 | -1.5 | -1.5 | ATP-dependent DNA helicase (by homology)                                                                              |
| CA5498 | orf19.5340 | <i>IPF772</i>     | -1.2 | 1.0  | 1.1  | -1.0 | YPL249C | <i>GYP5</i>  | 1.0 | -1.1 | -1.3 | -1.4 | unknown function                                                                                                      |
| CA5499 | orf19.5341 | <i>RPS4A</i>      | 1.0  | -1.2 | -1.3 | -1.1 | YJR145C | <i>RPS4A</i> | 1.0 | 1.3  | 1.3  | 2.2  | ribosomal protein S4                                                                                                  |
| CA5500 | orf19.5342 | <i>IPF768</i>     | -1.1 | 1.0  | -1.1 | -1.0 | YHR202W |              | 1.0 | -1.5 | -1.5 | -1.3 | unknown function                                                                                                      |
| CA5501 |            | <i>MTR2.3</i>     | 1.0  | -1.0 | -1.1 | -1.0 | YKL186C | <i>MTR2</i>  | 1.0 | -1.1 | -1.2 | -1.1 | mRNA transport protein, 3-prime end (by homology)                                                                     |
| CA5502 | orf19.5343 | <i>IPF763</i>     | 1.1  | 1.2  | 1.1  | 1.0  | YKL185W | <i>ASH1</i>  | 1.0 | -1.3 | -1.2 | -1.4 | putative transcription factor with a Cys4- zinc finger (by homology)                                                  |
| CA5503 | orf19.5345 | <i>DSK2</i>       | 1.0  | 1.3  | 1.2  | 1.2  | YMR276W | <i>DSK2</i>  | 1.0 | 1.1  | 1.2  | -1.1 | ubiquitin-like protein (by homology)                                                                                  |
| CA5504 | orf19.5346 | <i>TAF65</i>      | 1.0  | 1.0  | 1.0  | 1.0  | YML114C | <i>TAF65</i> | 1.0 | -1.1 | -1.2 | -1.2 | subunit of transcription factor TFIID (by homology)                                                                   |
| CA5505 | orf19.5348 | <i>TPS3.3</i>     | -1.1 | 2.2  | 1.9  | 2.2  | YMR261C | <i>TPS3</i>  | 1.0 | -1.1 | -1.3 | -1.6 | alpha, alpha-trehalose-phosphate synthase, regulatory subunit, 3-prime end                                            |
| CA5506 | orf19.5350 | <i>IPF748</i>     | -1.1 | -1.0 | 1.1  | -1.0 | YML112W | <i>CTK3</i>  | 1.0 | -1.1 | -1.1 | -1.2 | unknown function                                                                                                      |
| CA5507 | orf19.5351 | <i>TIF11</i>      | 1.3  | 1.3  | 1.2  | 1.3  | YMR260C | <i>TIF11</i> | 1.0 | 1.2  | 1.4  | 1.5  | translation initiation factor eIF1a (by homology)                                                                     |
| CA5510 | orf19.5356 | <i>IPF741</i>     | -1.0 | -1.1 | -1.2 | -1.3 | YNL313C |              | 1.0 | 1.1  | 1.2  | 1.2  | unknown function                                                                                                      |
| CA5511 | orf19.5357 | <i>AKL1</i>       | -1.4 | 1.0  | -1.1 | -1.0 | YIL095W | <i>PRK1</i>  | 1.0 | -1.1 | -1.0 | 1.0  | serine/threonine protein kinase (by homology)                                                                         |
| CA5512 | orf19.5358 | <i>ORC2</i>       | -1.1 | -1.0 | -1.0 | -1.1 | YBR060C | <i>ORC2</i>  | 1.0 | -1.2 | -1.2 | -1.2 | origin recognition complex subunit 2 (by homology)                                                                    |

|        |            |                  |      |      |      |      |         |               |     |      |      |      |                                                                                       |
|--------|------------|------------------|------|------|------|------|---------|---------------|-----|------|------|------|---------------------------------------------------------------------------------------|
| CA5513 | orf19.5360 | <i>RPC11</i>     | 1.1  | 1.1  | 1.0  | 1.0  | YDR045C | <i>RPC11</i>  | 1.0 | -1.8 | -1.3 | -1.1 | RNA polymerase III C11 subunit (by homology)                                          |
| CA5515 | orf19.5363 | <i>SAT2</i>      | -1.0 | 1.1  | 1.1  | 1.0  | YBR070C |               | 1.0 | 1.1  | 1.0  | 1.0  | putative glycosyl-transferase involved in osmotolerance (by homology)                 |
| CA5516 | orf19.5364 | <i>IPF726</i>    | 1.1  | 1.0  | -1.1 | -1.1 | YBR065C | <i>ECM2</i>   | 1.0 | 1.1  | 1.3  | 1.2  | rna binding protein (by homology)                                                     |
| CA5518 | orf19.5366 | <i>IPF721.5F</i> | -1.0 | -1.0 | -1.2 | -1.1 | YMR259C |               | 1.0 | 1.1  | 1.1  | 1.2  | unknown function, 5-prime end                                                         |
| CA5519 | orf19.5367 | <i>RDH54</i>     | 1.0  | 1.2  | 1.3  | 1.1  | YBR073W | <i>RDH54</i>  | 1.0 | -1.4 | -1.4 | -1.2 | helicase required for mitotic diploid-specific recombination and repair (by homology) |
| CA5520 | orf19.5368 | <i>IPF714</i>    | -1.0 | -1.1 | -1.1 | 1.0  | YDR049W |               | 1.0 | -1.0 | 1.2  | 1.7  | unknown function                                                                      |
| CA5521 | orf19.5369 | <i>HEM12</i>     | -1.1 | -1.1 | -1.2 | -1.1 | YDR047W | <i>HEM12</i>  | 1.0 | -1.0 | 1.1  | 1.1  | uroporphyrinogen decarboxylase (by homology)                                          |
| CA5522 | orf19.5370 | <i>IPF708</i>    | -1.1 | 1.0  | 1.0  | -1.0 | YBR075W |               | 1.0 | -1.1 | 1.1  | 1.2  | unknown function                                                                      |
| CA5523 | orf19.7279 | <i>NIT2</i>      | 1.1  | -1.0 | -1.0 | 1.0  | YJL126W | <i>NIT2</i>   | 1.0 | -1.4 | -1.2 | -1.3 | Nitrilase (by homology)                                                               |
| CA5524 | orf19.7281 | <i>IPF2861</i>   | -1.1 | -1.3 | -1.3 | -1.3 | YIL042C |               | 1.0 | 1.2  | 1.0  | 1.1  | putative pyruvate dehydrogenase kinase                                                |
| CA5525 | orf19.7282 | <i>PEX13</i>     | 1.0  | -1.9 | -1.7 | -1.4 | YLR191W | <i>PEX13</i>  | 1.0 | -1.1 | -1.3 | -1.4 | Peroxisome import protein - peroxin (by homology)                                     |
| CA5527 | orf19.7285 | <i>IPF2856</i>   | -1.1 | -1.1 | -1.1 | -1.2 | YGR156W | <i>PTI1</i>   | 1.0 | -1.2 | -1.4 | -1.6 | unknown function                                                                      |
| CA5528 | orf19.7286 | <i>RPN7</i>      | -1.0 | 1.0  | -1.1 | -1.1 | YPR108W | <i>RPN7</i>   | 1.0 | 1.1  | 1.5  | 1.2  | Subunit of the regulatory particle of the proteasome (by homology)                    |
| CA5530 | orf19.7290 | <i>SPB8</i>      | 1.1  | -1.0 | -1.1 | -1.0 | YJL124C | <i>LSM1</i>   | 1.0 | -1.0 | 1.2  | 1.1  | Suppressor of PAB1 (by homology)                                                      |
| CA5531 | orf19.7291 | <i>GCD14</i>     | 1.0  | -1.0 | -1.0 | -1.2 | YJL125C | <i>GCD14</i>  | 1.0 | -1.1 | 1.1  | 1.0  | Translational repressor of GCN4                                                       |
| CA5532 | orf19.7292 | <i>ARP2</i>      | -1.0 | 1.1  | 1.2  | 1.1  | YDL029W | <i>ARP2</i>   | 1.0 | -1.0 | 1.2  | -1.1 | actin-like protein (by homology)                                                      |
| CA5533 | orf19.7293 | <i>IPF2846</i>   | 1.0  | 1.0  | -1.0 | 1.0  | YDL028C | <i>MPS1</i>   | 1.0 | -1.0 | -1.1 | -1.1 | similar to Saccharomyces cerevisiae Mps1p serine/threonine/tyrosine prc               |
| CA5534 | orf19.7295 | <i>IPF2843</i>   | 1.1  | 1.0  | 1.1  | -1.0 | YOR329C | <i>SCD5</i>   | 1.0 | -1.2 | 1.3  | 1.5  | unknown function                                                                      |
| CA5536 | orf19.7297 | <i>IPF2837</i>   | 1.1  | 1.1  | 1.3  | 1.3  | YHR112C |               | 1.0 | -1.4 | -1.4 | -1.4 | putative cystathionine gamma-synthase (by homology)                                   |
| CA5537 | orf19.7298 | <i>CHS2</i>      | 1.2  | 1.2  | 1.6  | 1.3  | YNL192W | <i>CHS1</i>   | 1.0 | 1.1  | 1.3  | 1.5  | Chitin synthase                                                                       |
| CA5544 | orf19.7306 | <i>IPF5987</i>   | 1.0  | -1.1 | -1.1 | -1.0 | YPR127W |               | 1.0 | -1.1 | 1.1  | -1.1 | unknown function                                                                      |
| CA5545 | orf19.7307 | <i>IPF5986</i>   | 1.2  | -1.1 | -1.1 | -1.2 | YML125C |               | 1.0 | -1.3 | -1.2 | 1.3  | similar to cytochrome-b5- and nitrate reductases                                      |
| CA5546 | orf19.7308 | <i>TUB1.3</i>    | 1.3  | 1.4  | 1.9  | 1.4  | YML085C | <i>TUB1</i>   |     |      |      |      | Alpha-1 tubulin, 3-prime end                                                          |
| CA5547 | orf19.7310 | <i>IPF5981</i>   | -1.1 | -1.1 | -1.2 | -1.0 | YML128C | <i>MSC1</i>   | 1.0 | 1.7  | 1.0  | -2.5 | similar to Saccharomyces cerevisiae Gin3p (by homology)                               |
| CA5549 | orf19.7312 | <i>ERG13</i>     | -1.1 | -1.2 | -1.2 | -1.2 | YML126C | <i>ERG13</i>  | 1.0 | 1.3  | 1.8  | 2.1  | 3-hydroxy-3-methylglutaryl coenzyme A synthase (by homology)                          |
| CA5550 | orf19.7313 | <i>SSU1</i>      | 1.1  | 1.4  | 1.8  | 1.3  | YPL092W | <i>SSU1</i>   | 1.0 | -1.1 | -1.1 | 1.5  | Sulfite sensitivity protein (by homology)                                             |
| CA5555 | orf19.7319 | <i>SUC1</i>      | -1.0 | 1.0  | 1.0  | 1.1  | YFL052W |               | 1.0 | 1.2  | 1.3  | 1.2  | Putative zinc finger protein Suc1                                                     |
| CA5557 | orf19.7321 | <i>IPF1968</i>   | -1.2 | -1.1 | -1.2 | -1.1 | YMR029C |               | 1.0 | 1.1  | 1.2  | -1.1 | unknown function                                                                      |
| CA5558 | orf19.7322 | <i>IPF1969</i>   | 1.6  | 1.6  | 1.9  | 1.8  | YPL225W |               | 1.0 | -1.4 | -1.2 | -1.3 | unknown function                                                                      |
| CA5560 | orf19.7324 | <i>THI13</i>     | 1.0  | -1.0 | 1.0  | 1.0  | YDL244W | <i>THI13</i>  | 1.0 | -1.8 | -1.4 | -1.4 | Pyrimidine precursor biosynthesis enzyme (by homology)                                |
| CA5561 | orf19.7325 | <i>SCO1</i>      | 1.0  | 1.0  | 1.1  | 1.1  | YBR037C | <i>SCO1</i>   | 1.0 | -2.4 | -2.1 | -1.3 | Inner mitochondrial membrane protein (by homology)                                    |
| CA5563 | orf19.7327 | <i>PHO88</i>     | 1.2  | -1.0 | -1.1 | 1.0  | YBR106W | <i>PHO88</i>  | 1.0 | -1.5 | -1.0 | 1.1  | Involved in phosphate transport (by homology)                                         |
| CA5565 | orf19.7329 | <i>QRI8</i>      | 1.1  | 1.1  | 1.0  | -1.0 | YMR022W | <i>QRI8</i>   | 1.0 | 1.2  | 1.2  | 1.0  | E2 ubiquitin-conjugation enzyme (by homology)                                         |
| CA5566 | orf19.7330 | <i>PET18</i>     | -1.0 | 1.0  | 1.0  | -1.0 | YCR020C | <i>PET18</i>  | 1.0 | 1.0  | -1.0 | 1.0  | Putative transcriptional regulator (by homology)                                      |
| CA5568 | orf19.7332 | <i>ELF1</i>      | -1.3 | -1.2 | -1.5 | -1.3 | YPL226W | <i>NEW1</i>   | 1.0 | 1.0  | 1.7  | 3.1  | Elongation-like factor                                                                |
| CA5569 | orf19.7335 | <i>PRE8</i>      | 1.1  | 1.0  | 1.1  | 1.2  | YML092C | <i>PRE8</i>   | 1.0 | -1.5 | -1.8 | -1.5 | 20S proteasome subunit Y7 (by homology)                                               |
| CA5576 | orf19.7343 | <i>PRP4</i>      | -1.0 | 1.0  | 1.0  | 1.0  | YPR178W | <i>PRP4</i>   | 1.0 | -1.1 | 1.2  | 1.1  | pre-mRNA-processing U4/U6 small nuclear ribonucleoprotein (by homolc                  |
| CA5577 | orf19.7344 | <i>IPF12537</i>  | 1.0  | -1.0 | -1.0 | -1.0 | YPR179C | <i>PLO1</i>   | 1.0 | -1.1 | 1.1  | 1.0  | unknown function                                                                      |
| CA5578 | orf19.7345 | <i>IPF12536</i>  | -1.0 | -1.0 | -1.0 | -1.0 | YGR205W |               | 1.0 | 1.0  | 1.1  | 1.0  | unknown function                                                                      |
| CA5580 | orf19.7124 | <i>RVS161</i>    | 1.1  | 1.0  | 1.0  | 1.1  | YCR009C | <i>RVS161</i> | 1.0 | -1.0 | -1.3 | -1.4 | cytoskeletal binding protein (by homology)                                            |
| CA5581 | orf19.7119 | <i>RAD3</i>      | -1.2 | 1.2  | 1.2  | 1.1  | YER171W | <i>RAD3</i>   | 1.0 | -1.3 | -1.4 | -1.6 | DNA helicase/ATPase by homology                                                       |
| CA5582 | orf19.7118 | <i>ADK2</i>      | 1.1  | -1.6 | -1.8 | -1.3 | YER170W | <i>ADK2</i>   | 1.0 | -1.1 | -1.2 | -1.3 | adenylate kinase, mitochondrial (by homology)                                         |
| CA5583 | orf19.7116 | <i>IPF5644</i>   | -1.0 | -1.0 | -1.2 | -1.0 | YOR123C | <i>LEO1</i>   | 1.0 | -1.0 | 1.2  | 1.1  | unknown function                                                                      |
| CA5584 | orf19.7115 | <i>SAC7</i>      | 1.2  | -1.1 | -1.2 | -1.1 | YDR389W | <i>SAC7</i>   | 1.0 | -1.6 | -1.7 | -2.0 | GAP for RHO1 by homology                                                              |
| CA5589 | orf19.7111 | <i>IPF5621</i>   | -1.1 | -1.1 | -1.0 | -1.0 | YIL065C | <i>FIS1</i>   | 1.0 | -1.4 | -1.4 | -1.5 | unknown function                                                                      |
| CA5590 | orf19.7110 | <i>TAD1</i>      | -1.0 | -1.0 | 1.1  | -1.0 | YGL243W | <i>TAD1</i>   | 1.0 | 1.0  | -1.0 | 1.0  | Double-stranded rna specific adenosine deaminase by homology                          |
| CA5591 | orf19.7109 | <i>IPF5618</i>   | -1.1 | -1.1 | -1.3 | -1.0 | YGL242C |               | 1.0 | 1.2  | 1.2  | 1.3  | unknown function                                                                      |
| CA5593 | orf19.7107 | <i>IPF5615</i>   | 1.0  | 1.0  | 1.0  | 1.0  | YJL122W |               | 1.0 | -1.4 | 1.2  | 1.2  | unknown function                                                                      |
| CA5594 | orf19.7106 | <i>IPF19814</i>  | 1.1  | -1.0 | -1.1 | -1.1 | YJR126C |               | 1.0 | 1.1  | 1.2  | 1.3  | folate hydrolase (by homology)                                                        |
| CA5595 | orf19.7105 | <i>IPF568</i>    | 1.1  | 1.0  | -1.0 | -1.0 | YJL157C | <i>FAR1</i>   | 1.0 | -1.7 | -1.4 | -1.2 | similar to Saccharomyces cerevisiae Far1p cyclin-dependent kinase inhibit             |
| CA5597 | orf19.7103 | <i>IPF563</i>    | -1.0 | -1.0 | -1.0 | -1.0 | YCL036W |               | 1.0 | -1.1 | -1.2 | -1.2 | unknown function                                                                      |
| CA5598 | orf19.7101 | <i>IPF562</i>    | 1.0  | 1.0  | 1.1  | 1.0  | YGR099W | <i>TEL2</i>   | 1.0 | -1.4 | -1.5 | -1.6 | unknown function                                                                      |
| CA5600 | orf19.7100 | <i>IPF559</i>    | -1.1 | -1.0 | 1.2  | 1.0  | YJR001W |               | 1.0 | -1.2 | -1.1 | -1.2 | unknown function                                                                      |
| CA5601 | orf19.7098 | <i>IPF556</i>    | 1.0  | 1.1  | 1.1  | 1.1  | YKL070W |               | 1.0 | -2.8 | -2.2 | -1.8 | transcriptional regulator (by homology)                                               |
| CA5603 | orf19.7096 | <i>IPF553</i>    | -1.0 | 1.1  | 1.1  | 1.1  | YLR001C |               | 1.0 | -1.1 | -1.2 | -1.1 | unknown function                                                                      |
| CA5604 | orf19.7095 | <i>IPF549</i>    | 1.1  | 1.2  | 1.7  | 1.2  | YOR390W |               | 1.0 | -1.0 | 1.2  | 1.4  | unknown function                                                                      |
| CA5608 | orf19.7092 | <i>IPF539</i>    | -1.1 | -1.1 | -1.2 | -1.0 | YLR290C |               | 1.0 | -1.2 | -1.2 | -1.4 | unknown function                                                                      |
| CA5610 | orf19.7089 | <i>PMR1</i>      | 1.1  | 1.0  | 1.1  | 1.1  | YGL167C | <i>PMR1</i>   | 1.0 | 1.1  | -1.0 | 1.2  | calcium/mangenease P-type ATPase                                                      |
| CA5611 | orf19.7088 | <i>SUA5</i>      | 1.1  | -1.2 | -1.1 | -1.2 | YGL169W | <i>SUA5</i>   | 1.0 | -1.4 | 1.0  | 1.1  | translation initiation protein (by homology)                                          |
| CA5612 | orf19.7086 | <i>KAP114</i>    | -1.1 | 1.2  | 1.0  | 1.1  | YGL241W | <i>KAP114</i> | 1.0 | 1.0  | 1.2  | 1.3  | putative RAN-binding protein/importin (by homology)                                   |
| CA5615 | orf19.7083 | <i>IPF520</i>    | -1.0 | -1.0 | 1.1  | 1.0  | YCL016C | <i>DCC1</i>   | 1.0 | -1.1 | -1.3 | 1.1  | unknown function                                                                      |

|        |            |                 |      |      |      |      |         |               |     |      |      |      |                                                                                |
|--------|------------|-----------------|------|------|------|------|---------|---------------|-----|------|------|------|--------------------------------------------------------------------------------|
| CA5616 | orf19.7082 | <i>PET8</i>     | -1.0 | 1.1  | 1.2  | -1.0 | YNL003C | <i>PET8</i>   | 1.0 | -1.1 | 1.0  | 1.1  | mitochondrial carrier protein (by homology)                                    |
| CA5617 | orf19.7081 | <i>SPL1</i>     | -1.1 | -1.0 | 1.0  | -1.1 | YCL017C | <i>NFS1</i>   | 1.0 | 1.1  | 1.2  | 1.1  | tRNA splicing protein                                                          |
| CA5618 | orf19.7080 | <i>LEU2</i>     | -1.2 | -1.2 | -1.3 | -1.1 | YCL018W | <i>LEU2</i>   | 1.0 | 1.4  | 2.5  | 2.6  | isopropyl malate dehydrogenase                                                 |
| CA5619 | orf19.7079 | <i>IPF514</i>   | 1.0  | -1.0 | -1.0 | 1.0  | YCL014W | <i>BUD3</i>   | 1.0 | 1.0  | -1.1 | 1.1  | similar to <i>Saccharomyces cerevisiae</i> Bud3p budding protein (by homolog   |
| CA5621 | orf19.7077 | <i>FRE7</i>     | -1.0 | -1.5 | -1.4 | -1.3 | YOL152W | <i>FRE7</i>   | 1.0 | -1.5 | -1.2 | -1.2 | Ferric reductase transmembrane component (by homology)                         |
| CA5622 | orf19.7076 | <i>GBP2.3</i>   | 1.1  | 1.0  | 1.3  | 1.0  | YCL011C | <i>GBP2</i>   | 1.0 | -1.1 | 1.1  | 1.5  | single-strand telomeric DNA-binding protein, 3-prime end (by homology)         |
| CA5623 | orf19.7074 | <i>IPF502</i>   | 1.0  | 1.0  | -1.0 | 1.0  | YCL010C |               | 1.0 | -1.2 | -1.0 | 1.0  | unknown function                                                               |
| CA5625 | orf19.7072 | <i>PEL1</i>     | -1.0 | -1.0 | -1.1 | -1.0 | YCL004W | <i>PGS1</i>   | 1.0 | -1.1 | -1.1 | -1.0 | CDP-diacylglycerol-serine-O-phosphatidyltransferase (by homology)              |
| CA5627 | orf19.7069 | <i>IPF495</i>   | 1.0  | 1.0  | 1.0  | -1.0 | YBR261C |               | 1.0 | 1.1  | 1.2  | 1.7  | unknown function                                                               |
| CA5629 | orf19.7067 | <i>CTR9</i>     | -1.5 | -1.5 | -2.9 | -2.0 | YOL145C | <i>CTR9</i>   | 1.0 | 1.2  | 1.3  | 1.4  | required for G1 cyclin expression (by homology)                                |
| CA5630 | orf19.7065 | <i>IPF486</i>   | 1.0  | -1.0 | -1.0 | -1.0 | YOL146W |               | 1.0 | 1.1  | -1.0 | -1.1 | unknown function                                                               |
| CA5631 | orf19.7064 | <i>GLN4</i>     | -1.0 | -1.0 | -1.1 | -1.1 | YOR168W | <i>GLN4</i>   | 1.0 | -1.0 | 1.6  | 1.5  | glutaminyI-tRNA synthetase (by homology)                                       |
| CA5632 | orf19.7063 | <i>IPF480</i>   | -1.1 | -1.1 | -1.1 | -1.0 | YGR024C |               | 1.0 | -1.2 | 1.0  | -1.0 | unknown function                                                               |
| CA5633 | orf19.7062 | <i>RPA135</i>   | -1.0 | 1.2  | -1.1 | -1.2 | YPR010C | <i>RPA135</i> | 1.0 | 1.0  | 1.7  | 2.5  | DNA-directed RNA polymerase I, 135 KD subunit (by homology)                    |
| CA5634 | orf19.7061 | <i>IPF477</i>   | 1.0  | 1.0  | 1.0  | 1.0  | YFR007W |               | 1.0 | -1.4 | -1.3 | -1.4 | unknown function                                                               |
| CA5636 | orf19.7059 | <i>IPF473</i>   | 1.0  | -1.0 | -1.0 | 1.0  | YOR166C |               | 1.0 | -1.3 | 1.2  | 1.2  | unknown Function                                                               |
| CA5637 | orf19.7058 | <i>IPF472</i>   | -1.0 | -1.0 | 1.1  | 1.0  | YFR048W |               | 1.0 | -1.6 | -1.7 | -1.7 | unknown Function                                                               |
| CA5638 | orf19.7057 | <i>IPF470</i>   | -1.3 | -1.2 | -1.5 | -1.3 | YGL245W |               | 1.0 | 1.2  | 1.6  | 1.8  | putative glutamine-tRNA ligase (by homology)                                   |
| CA5641 | orf19.7053 | <i>GAC1</i>     | 1.2  | -1.1 | 1.0  | -1.0 | YOR178C | <i>GAC1</i>   | 1.0 | 1.5  | 2.5  | 1.7  | ser/thr phosphoprotein phosphatase 1, regulatory chain (by homology)           |
| CA5642 | orf19.7052 | <i>INP52</i>    | -1.0 | -1.1 | -1.1 | -1.1 | YOR109W | <i>INP53</i>  | 1.0 | -1.0 | -1.0 | 1.2  | phosphatidylinositol phosphate phosphatase (by homology)                       |
| CA5643 | orf19.7051 | <i>IPF448</i>   | 1.0  | -1.0 | -1.0 | 1.0  | YOR111W |               | 1.0 | 1.0  | 1.1  | 1.2  | unknown function                                                               |
| CA5644 | orf19.7050 | <i>IPF447</i>   | -1.0 | 1.0  | 1.0  | 1.1  | YNL110C |               | 1.0 | 1.5  | 1.7  | 2.0  | unknown function                                                               |
| CA5645 | orf19.7049 | <i>CYB5</i>     | 1.6  | -1.2 | 1.2  | 1.0  | YNL111C | <i>CYB5</i>   | 1.0 | -1.5 | -1.0 | -1.2 | Cytochrome b5 (by homology)                                                    |
| CA5646 |            | <i>RPS28B.3</i> | 1.6  | 1.5  | 1.6  | 1.6  | YLR264W | <i>RPS28B</i> | 1.0 | 2.0  | 1.7  | 2.5  | Ribosomal protein S28B (S33B) (YS27), 3-prime end (by homology)                |
| CA5648 | orf19.7347 | <i>UBC6</i>     | -1.0 | 1.0  | 1.1  | -1.0 | YER100W | <i>UBC6</i>   | 1.0 | 1.0  | 1.2  | 1.6  | E2 ubiquitin-conjugating enzyme (by homology)                                  |
| CA5649 | orf19.7349 | <i>CHS4</i>     | -1.2 | -1.1 | -1.2 | -1.0 | YBL061C | <i>SKT5</i>   | 1.0 | -1.1 | -1.2 | -1.2 | Chitin synthase regulatory factor                                              |
| CA5650 | orf19.7350 | <i>IPF7109</i>  | 1.1  | -1.0 | -1.1 | -1.1 | YNL208W |               | 1.0 | -1.2 | -1.5 | -2.4 | unknown function                                                               |
| CA5651 | orf19.7353 | <i>KIP3</i>     | -1.1 | -1.1 | -1.0 | -1.0 | YGL216W | <i>KIP3</i>   | 1.0 | -1.1 | -1.1 | 1.2  | Kinesin-related protein required for nuclear migration (by homology)           |
| CA5653 | orf19.7355 | <i>SSN8</i>     | 1.0  | -1.0 | 1.0  | 1.0  | YNL025C | <i>SSN8</i>   | 1.0 | -3.7 | -2.7 | -2.6 | C-type cyclin associated with the Ssn3p cyclin-dependent kinase (by hon        |
| CA5655 | orf19.7357 | <i>IPF18080</i> | -1.5 | -2.3 | -2.5 | -2.2 | YIL083C |               | 1.0 | 1.0  | 1.1  | 1.1  | unknown function                                                               |
| CA5656 | orf19.7358 | <i>IPF14683</i> | -1.0 | -1.1 | -1.1 | 1.1  | YNL026W |               | 1.0 | -1.3 | -1.1 | -1.1 | unknown function                                                               |
| CA5657 | orf19.7359 | <i>IPF14682</i> | 1.2  | 1.0  | 1.4  | 1.1  | YNL027W | <i>CRZ1</i>   | 1.0 | 1.0  | 1.1  | 1.1  | putative transcription factor (by homology)                                    |
| CA5658 | orf19.7360 | <i>IPF1242</i>  | -1.0 | 1.0  | 1.0  | -1.0 | YPL047W |               | 1.0 | -1.6 | -1.3 | -1.9 | unknown function                                                               |
| CA5659 | orf19.7361 | <i>SEN54</i>    | 1.0  | -1.0 | -1.1 | -1.1 | YPL083C | <i>SEN54</i>  | 1.0 | -1.4 | 1.2  | 1.4  | tRNA splicing endonuclease alpha subunit(by homology)                          |
| CA5661 | orf19.7363 | <i>KRE6</i>     | 1.1  | 1.3  | 1.8  | 1.3  | YPR159W | <i>KRE6</i>   | 1.0 | -1.0 | 1.2  | 1.5  | Glucan synthase subunit                                                        |
| CA5663 | orf19.7365 | <i>IPF1251</i>  | -1.0 | -1.0 | -1.0 | -1.0 | YIL097W | <i>FYV10</i>  | 1.0 | -1.3 | -1.4 | -1.5 | unknown function                                                               |
| CA5664 | orf19.7366 | <i>IPF1252</i>  | -1.0 | -1.0 | -1.0 | -1.1 | YIL096C |               | 1.0 | -1.0 | -1.3 | -1.1 | Conserved hypothetical protein                                                 |
| CA5665 | orf19.7367 | <i>UBP1</i>     | 1.0  | -1.1 | -1.0 | -1.0 | YDL122W | <i>UBP1</i>   | 1.0 | -1.2 | -1.1 | 1.3  | Ubiquitin-specific protease (by homology)                                      |
| CA5666 | orf19.7368 | <i>PUB1</i>     | 1.3  | 1.3  | 1.4  | 1.3  | YNL016W | <i>PUB1</i>   | 1.0 | -1.1 | -1.1 | -1.0 | Major polyadenylated RNA-binding protein (by homology)                         |
| CA5667 | orf19.7369 | <i>IPF1259</i>  | -1.0 | 1.0  | -1.0 | -1.0 | YML005W |               | 1.0 | -1.3 | -1.4 | -1.3 | Conserved hypothetical protein                                                 |
| CA5668 | orf19.7370 | <i>IPF1261</i>  | 1.2  | 1.1  | -1.0 | -1.0 | YOL092W |               | 1.0 | 1.3  | 1.6  | 2.1  | unknown function                                                               |
| CA5671 | orf19.7374 | <i>CTA4</i>     | 1.0  | 1.2  | 1.2  | 1.2  | YAL051W | <i>OAF1</i>   | 1.0 | 1.3  | 1.4  | 1.2  | Probable transcription factor                                                  |
| CA5674 | orf19.7377 | <i>IPF1274</i>  | 1.0  | 1.0  | 1.1  | 1.0  | YOR058C | <i>ASE1</i>   | 1.0 | -1.4 | -1.4 | -1.3 | similar to <i>Saccharomyces cerevisiae</i> Ase1p component of the anaphase     |
| CA5675 | orf19.7378 | <i>SIS2</i>     | -1.0 | 1.0  | 1.2  | 1.0  | YKR072C | <i>SIS2</i>   | 1.0 | -1.2 | 1.1  | 1.3  | Involved in cell cycle-specific gene expression (by homology)                  |
| CA5681 | orf19.7383 | <i>MNN9</i>     | 1.0  | 1.0  | 1.0  | 1.0  | YPL050C | <i>MNN9</i>   | 1.0 | 1.1  | 1.3  | 1.3  | Required for complex N-glycosylation                                           |
| CA5682 | orf19.7384 | <i>NOG1</i>     | -1.3 | -1.2 | -1.4 | -1.3 | YPL093W | <i>NOG1</i>   | 1.0 | 1.3  | 1.7  | 2.7  | Nucleolar G-protein (by homology)                                              |
| CA5683 | orf19.7385 | <i>IPF3333</i>  | 1.0  | -1.0 | -1.0 | -1.0 | YPL054W | <i>LEE1</i>   | 1.0 | 1.0  | -1.2 | -1.8 | unknown function                                                               |
| CA5684 | orf19.7386 | <i>IPF3331</i>  | 1.2  | 1.1  | 1.1  | -1.1 | YBR185C | <i>MBA1</i>   | 1.0 | -1.4 | -1.5 | -1.3 | unknown function                                                               |
| CA5685 | orf19.7387 | <i>HPA1</i>     | -1.0 | -1.0 | -1.1 | -1.1 | YPL086C | <i>ELP3</i>   | 1.0 | 1.3  | 1.6  | 1.5  | RNA polymerase II-associated Histone acetyltransferase (by homology)           |
| CA5686 | orf19.7388 | <i>IPF3329</i>  | -1.1 | -1.2 | -1.3 | -1.3 | YJL128C | <i>PBS2</i>   | 1.0 | -1.4 | -1.1 | -1.0 | similar to <i>Saccharomyces cerevisiae</i> Pbs2p tyrosine protein kinase of th |
| CA5687 | orf19.7389 | <i>REV3.5F</i>  | -1.0 | 1.1  | -1.0 | -1.0 | YPL167C | <i>REV3</i>   | 1.0 | -1.8 | -1.5 | -1.3 | DNA-directed DNA polymerase zeta subunit, 5-prime end (by homology)            |
| CA5690 | orf19.7391 | <i>OCH1</i>     | 1.1  | 1.1  | 1.1  | 1.1  | YGL038C | <i>OCH1</i>   | 1.0 | -1.1 | -1.4 | 1.1  | Alpha-1,6-mannosyltransferase (by homology)                                    |
| CA5691 | orf19.7392 | <i>DED1</i>     | 1.3  | 1.6  | 1.9  | 1.4  | YOR204W | <i>DED1</i>   | 1.0 | 1.1  | 2.4  | 3.3  | RNA helicase (by homology)                                                     |
| CA5692 | orf19.7393 | <i>UTR1</i>     | -1.1 | -1.0 | -1.0 | -1.1 | YJR049C | <i>UTR1</i>   | 1.0 | -1.8 | -1.4 | 1.0  | Associated with ferric reductase activity (by homology)                        |
| CA5693 | orf19.7394 | <i>GDA1</i>     | -1.1 | -1.0 | 1.0  | -1.0 | YEL042W | <i>GDA1</i>   | 1.0 | -1.2 | 1.6  | 1.6  | Golgi guanosine diphosphatase (by homology)                                    |
| CA5695 | orf19.7397 | <i>IPF3310</i>  | -1.1 | -1.2 | -1.5 | -1.3 | YPR022C |               | 1.0 | 1.0  | -1.1 | 1.1  | unknown function                                                               |
| CA5701 | orf19.7401 | <i>ISW2</i>     | -1.2 | -1.4 | -1.4 | -1.3 | YOR304W | <i>ISW2</i>   | 1.0 | -1.2 | -1.0 | 1.1  | Chromatin remodeling complex (by homology)                                     |
| CA5702 | orf19.7402 | <i>PCH1</i>     | -1.3 | 1.1  | -1.1 | -1.0 | YDR440W | <i>DOT1</i>   | 1.0 | -1.4 | -1.2 | -1.4 | Putative ATPase (by homology)                                                  |
| CA5703 | orf19.7403 | <i>IPF2463</i>  | 1.0  | 1.0  | -1.1 | -1.1 | YML020W |               | 1.0 | -1.0 | -1.1 | -1.3 | unknown function                                                               |
| CA5704 | orf19.7404 | <i>CHA11</i>    | 1.0  | 1.4  | 1.6  | 1.4  | YCL064C | <i>CHA1</i>   | 1.0 | -1.1 | -1.3 | -1.5 | L-serine/L-threonine deaminase (by homology)                                   |
| CA5707 | orf19.7409 | <i>ERV25</i>    | 1.1  | 1.4  | 1.3  | 1.3  | YML012W | <i>ERV25</i>  | 1.0 | -1.3 | -1.3 | -1.4 | Component of COPII-coated vesicles (by homology)                               |



|        |            |          |      |      |      |      |         |        |     |      |                                                   |      |                                                                                        |
|--------|------------|----------|------|------|------|------|---------|--------|-----|------|---------------------------------------------------|------|----------------------------------------------------------------------------------------|
| CA5708 |            | MRPL39   | 1.0  | -1.0 | 1.0  | -1.0 | YML009C | MRPL39 |     |      | Mitochondrial 60S ribosomal protein (by homology) |      |                                                                                        |
| CA5709 | orf19.7410 | IPF2653  | -1.3 | -1.0 | -1.5 | -1.1 | YDR430C |        | 1.0 | 1.4  | 1.2                                               | 1.6  | unknown function                                                                       |
| CA5710 | orf19.7411 | OAC1     | 1.0  | 1.1  | 1.0  | -1.0 | YKL120W | OAC1   | 1.0 | 1.1  | 1.2                                               | 1.4  | Mitochondrial oxaloacetate transport protein (by homology)                             |
| CA5711 | orf19.7412 | MUB1     | 1.0  | -1.1 | -1.1 | 1.1  | YMR100W | MUB1   | 1.0 | 1.0  | 1.2                                               | 1.6  | Regulation of bud site selection (by homology)                                         |
| CA5712 | orf19.7413 | IPF2657  | -1.1 | -1.0 | 1.0  | -1.0 | YEL019C | MMS21  | 1.0 | -1.5 | -1.2                                              | -1.1 | unknown function                                                                       |
| CA5714 | orf19.7417 | IPF2431  | 1.1  | 1.1  | -1.0 | 1.2  | YML028W | TSA1   | 1.0 | -1.3 | -1.2                                              | -2.0 | similar to Saccharomyces cerevisiae Tsa1p thiol-specific antioxidant-like              |
| CA5715 | orf19.7419 | HNT2     | 1.1  | 1.1  | 1.2  | 1.1  | YDR305C | HNT2   | 1.0 | -1.2 | -1.4                                              | -1.1 | Diadenosine polyphosphate hydrolase                                                    |
| CA5716 | orf19.7420 | MED6     | -1.0 | 1.0  | -1.1 | -1.0 | YHR058C | MED6   | 1.0 | -1.3 | -1.1                                              | -1.2 | RNA polymerase II transcriptional regulation mediator (by homology)                    |
| CA5717 | orf19.7421 | CYP51    | 1.2  | 1.2  | 1.1  | 1.2  | YDR304C | CYP5   | 1.0 | -1.1 | -1.0                                              | -1.3 | Cyclophilin - peptidylprolyl cis-trans isomerase or PPIase (by homology)               |
| CA5718 | orf19.7422 | LCP5     | -1.1 | -1.1 | -1.1 | -1.1 | YER127W | LCP5   | 1.0 | -1.2 | -1.3                                              | -1.0 | Ngg1p interacting protein (by homology)                                                |
| CA5719 | orf19.7424 | IPF2441  | 1.0  | -1.0 | -1.0 | -1.0 | YER126C | KRE32  | 1.0 | -1.3 | -1.1                                              | 1.3  | unknown function                                                                       |
| CA5720 | orf19.7425 | UNG1     | -1.0 | 1.0  | 1.1  | 1.1  | YML021C | UNG1   | 1.0 | -1.2 | -1.2                                              | -1.0 | Uracil-DNA glycosylase (by homology)                                                   |
| CA5721 | orf19.7426 | IPF2443  | -1.1 | -1.2 | -1.1 | -1.0 | YML019W | OST6   | 1.0 | 1.0  | 1.1                                               | -1.1 | similar to Saccharomyces cerevisiae Ost6p N-oligosaccharyltransferase                  |
| CA5722 | orf19.7427 | IPF2446  | 1.0  | 1.0  | 1.1  | 1.0  | YML018C |        | 1.0 | -1.9 | -2.4                                              | -2.0 | unknown function                                                                       |
| CA5723 | orf19.7428 | APN1     | -1.1 | -1.1 | -1.2 | -1.1 | YKL114C | APN1   | 1.0 | -1.1 | -1.0                                              | 1.2  | AP endonuclease, exonuclease III homologue (by homology)                               |
| CA5724 | orf19.7433 | NUP116   | -1.0 | 1.0  | 1.1  | -1.0 | YMR047C | NUP116 | 1.0 | -1.5 | -1.6                                              | -1.5 | nuclear pore protein (by homology)                                                     |
| CA5727 |            | ECM15    | 1.1  | 1.1  | 1.0  | -1.0 | YBL001C | ECM15  | 1.0 | -2.0 | -1.4                                              | -1.3 | Involved in cell wall biogenesis and architecture (by homology)                        |
| CA5728 | orf19.7437 | IPF2471  | -1.1 | -1.5 | -1.5 | -1.2 | YJL218W |        | 1.0 | -1.1 | 1.1                                               | 1.1  | maltose acetyltransferase                                                              |
| CA5729 | orf19.7438 | UBA1     | -1.2 | 1.0  | -1.2 | -1.1 | YKL210W | UBA1   | 1.0 | -1.4 | -1.1                                              | -1.2 | Ubiquitin-activating enzyme (by homology)                                              |
| CA5730 | orf19.7440 | HST6     | 1.0  | -1.0 | -1.0 | -1.0 | YKL209C | STE6   | 1.0 | -1.3 | 1.1                                               | 1.3  | ATP binding cassette protein                                                           |
| CA5734 | orf19.7444 | IPF20029 | 1.1  | 1.0  | 1.0  | 1.0  | YOR352W |        | 1.0 | 1.1  | 1.2                                               | 1.1  | unknown function                                                                       |
| CA5735 | orf19.7445 | IPF2878  | 1.1  | 1.7  | 2.1  | 1.8  | YBR105C | VID24  | 1.0 | 1.6  | 2.2                                               | 2.3  | unknown function                                                                       |
| CA5736 | orf19.7446 | OPI3     | 1.5  | -1.0 | 1.2  | 1.0  | YJR073C | OPI3   | 1.0 | -1.9 | -1.8                                              | -2.4 | Methylene-fatty-acyl-phospholipid synthase (by homology)                               |
| CA5737 | orf19.7447 | JEN1     | 1.0  | 1.0  | -1.0 | -1.0 | YKL217W | JEN1   | 1.0 | -1.6 | -1.7                                              | -4.5 | Carboxylic acid transporter protein (by homology)                                      |
| CA5738 | orf19.7448 | LYS9     | -1.0 | -1.5 | -1.3 | -1.1 | YNR050C | LYS9   | 1.0 | -1.1 | -1.2                                              | -1.1 | Lysine biosynthesis (by homology)                                                      |
| CA5739 | orf19.7449 | IPF2884  | -1.0 | -1.0 | 1.0  | -1.0 | YMR211W |        | 1.0 | 1.0  | 1.2                                               | 1.4  | unknown function                                                                       |
| CA5740 | orf19.7450 | IPF20030 | 1.0  | 1.0  | -1.0 | -1.1 | YNL166C | BNI5   | 1.0 | -1.1 | 1.2                                               | 1.3  | unknown function                                                                       |
| CA5742 | orf19.7451 | FUN31    | 1.0  | 1.1  | 1.2  | 1.2  | YAL017W | FUN31  | 1.0 | 1.0  | -1.3                                              | -1.3 | Serine/threonine kinase (by homology)                                                  |
| CA5743 | orf19.7452 | IPF2895  | -1.0 | -1.0 | -1.0 | 1.0  | YGL113W | SLD3   | 1.0 | 1.0  | 1.1                                               | 1.3  | unknown function                                                                       |
| CA5745 | orf19.7454 | TAF60    | -1.0 | 1.0  | -1.0 | 1.0  | YGL112C | TAF60  | 1.0 | 1.1  | 1.2                                               | 1.1  | TATA-binding protein-associated-factor (by homology)                                   |
| CA5749 | orf19.7459 | IPF2908  | -1.4 | 1.3  | 1.2  | 1.5  | YBR238C |        | 1.0 | 1.1  | 1.4                                               | 1.6  | unknown function                                                                       |
| CA5751 | orf19.5387 | VPS8     | -1.2 | 1.0  | 1.0  | -1.0 | YAL002W | VPS8   | 1.0 | 1.1  | 1.1                                               | 1.3  | Vacuolar sorting protein (by homology)                                                 |
| CA5752 | orf19.5388 | IPF1055  | -1.0 | 1.1  | 1.1  | -1.0 | YAR003W | SWD1   | 1.0 | 1.1  | 1.1                                               | 1.1  | unknown function                                                                       |
| CA5753 | orf19.5389 | FKH1     | 1.1  | 1.1  | 1.0  | -1.0 | YNL068C | FKH2   | 1.0 | -1.4 | -1.3                                              | -1.1 | Fork head protein type transcription factor                                            |
| CA5755 | orf19.5391 | IPF1063  | -1.1 | -1.1 | -1.1 | -1.0 | YML049C | RSE1   | 1.0 | -2.4 | -3.1                                              | -2.7 | Spliceosomal protein SAP 130 (by homology)                                             |
| CA5758 | orf19.5395 | IPF1069  | 1.0  | -1.0 | 1.1  | -1.0 | YJR033C | RAV1   | 1.0 | -1.2 | -1.5                                              | -1.4 | similar to Saccharomyces cerevisiae Rav1p involved in regulation of (H <sup>+</sup> ), |
| CA5759 |            | PET191.3 | 1.0  | 1.0  | 1.1  | 1.0  | YJR034W | PET191 | 1.0 | -1.2 | -1.4                                              | -1.4 | Assembly of cytochrome oxidase, 3-prime end (by homology)                              |
| CA5760 | orf19.5397 | IPF1072  | 1.0  | 1.1  | 1.1  | 1.0  | YGL005C | COD5   | 1.0 | -1.3 | -1.1                                              | -1.1 | unknown function                                                                       |
| CA5764 | orf19.5406 | IPF20031 | -1.1 | 1.1  | 1.1  | 1.1  | YLR019W | PSR2   | 1.0 | 1.2  | 1.4                                               | 2.0  | similar to Saccharomyces cerevisiae Psr2p plasma membrane phosphat                     |
| CA5765 | orf19.5407 | SOF1     | -1.1 | -1.1 | -1.1 | 1.0  | YLL011W | SOF1   | 1.0 | -1.1 | -1.1                                              | 1.2  | Involved in 18S pre-rRNA production (by homology)                                      |
| CA5766 | orf19.5408 | IPF1097  | -1.3 | 1.4  | 1.4  | 1.4  | YOR267C |        | 1.0 | -1.4 | 1.0                                               | 1.6  | serine/threonine protein kinase (by homology)                                          |
| CA5767 | orf19.5409 | IPF1098  | 1.1  | 1.1  | -1.0 | 1.1  | YNL265C | IST1   | 1.0 | -1.1 | -1.0                                              | -1.1 | unknown function                                                                       |
| CA5768 | orf19.5410 | PAC1     | 1.0  | 1.1  | 1.0  | 1.0  | YOR269W | PAC1   | 1.0 | -1.2 | -1.2                                              | -1.2 | Similarity to human LIS-1 protein (by homology)                                        |
| CA5769 | orf19.5411 | UBC12    | -1.0 | 1.0  | -1.1 | 1.1  | YLR306W | UBC12  | 1.0 | -1.6 | -1.3                                              | -1.5 | E2 ubiquitin-conjugating enzyme (by homology)                                          |
| CA5770 | orf19.5412 | IPF1103  | 1.0  | 1.1  | 1.0  | -1.0 | YKR004C | ECM9   | 1.0 | -1.9 | -1.7                                              | -1.7 | unknown function                                                                       |
| CA5771 | orf19.5413 | IPF1104  | -1.0 | 1.1  | 1.0  | -1.0 | YPL151C | PRP46  | 1.0 | -1.4 | -1.3                                              | -1.2 | similar to Saccharomyces cerevisiae Prp28p pre-mRNA splicing factor (b                 |
| CA5772 | orf19.5416 | ESA1     | -1.0 | 1.0  | 1.0  | -1.0 | YOR244W | ESA1   | 1.0 | -1.0 | 1.1                                               | -1.1 | Histone acetyltransferase (by homology)                                                |
| CA5773 | orf19.5417 | DOT5     | 1.0  | -1.0 | -1.0 | -1.0 | YIL010W | DOT5   | 1.0 | -1.1 | -1.2                                              | -1.3 | Derepression of telomeric silencing (by homology)                                      |
| CA5774 | orf19.5418 | IPF1113  | 1.0  | 1.0  | 1.1  | -1.1 | YIL039W |        | 1.0 | -1.9 | -2.0                                              | -1.9 | unknown function                                                                       |
| CA5775 | orf19.5419 | ATP5     | 1.0  | -1.2 | -1.3 | -1.1 | YDR298C | ATP5   | 1.0 | -1.0 | 1.0                                               | -1.7 | F1F0-ATPase complex, OSCP subunit (by homology)                                        |
| CA5776 | orf19.5420 | RML2     | -1.1 | -1.2 | -1.3 | -1.2 | YEL050C | RML2   | 1.0 | 1.0  | -1.3                                              | -1.3 | Ribosomal L2 protein, mitochondrial (by homology)                                      |
| CA5779 | orf19.5425 | IPF1121  | -1.1 | -1.1 | -1.1 | -1.1 | YKR079C |        | 1.0 | -1.3 | -1.2                                              | -1.3 | unknown function                                                                       |
| CA5780 | orf19.5426 | IPF1123  | -1.0 | -1.0 | 1.0  | -1.0 | YKR089C |        | 1.0 | 1.1  | 1.2                                               | 1.2  | unknown function                                                                       |
| CA5781 | orf19.5428 | IPF1126  | -1.0 | 1.0  | 1.1  | -1.0 | YOR079C | ATX2   | 1.0 | -2.1 | -2.0                                              | -2.0 | unknown function                                                                       |
| CA5782 | orf19.5429 | IPF1127  | 1.0  | -1.0 | 1.0  | 1.1  | YOR080W | DIA2   | 1.0 | -1.3 | -1.3                                              | -1.4 | unknown function                                                                       |
| CA5785 | orf19.5432 | TPT1     | 1.0  | 1.0  | 1.1  | 1.0  | YOL102C | TPT1   | 1.0 | -1.6 | -1.7                                              | -1.8 | tRNA 2-phosphotransferase (by homology)                                                |
| CA5786 | orf19.5433 | IPF1134  | -1.0 | -1.0 | 1.0  | -1.0 | YDR493W |        | 1.0 | -1.4 | -1.5                                              | -1.4 | unknown function                                                                       |
| CA5787 | orf19.5436 | IPF1136  | -1.1 | -1.2 | -1.2 | -1.1 | YGR128C |        | 1.0 | -1.0 | -1.1                                              | 1.1  | unknown function                                                                       |
| CA5788 | orf19.5437 | RHR2     | 1.0  | 9.7  | 8.1  | 9.4  | YIL053W | RHR2   | 1.0 | 3.6  | 3.5                                               | 10.6 | DL-glycerol phosphatase                                                                |
| CA5789 | orf19.5438 | IPF1143  | -1.1 | 1.2  | 1.1  | 1.2  | YER116C | SLX8   | 1.0 | -1.0 | -1.0                                              | -1.1 | Probable zinc-finger protein                                                           |
| CA5791 | orf19.5440 | RPT2     | -1.1 | -1.2 | -1.4 | -1.1 | YDL007W | RPT2   | 1.0 | -1.1 | 1.5                                               | 1.2  | 26S proteasome regulatory subunit (by homology)                                        |



|        |            |                    |      |       |       |       |         |               |     |      |      |      |                                                                                 |
|--------|------------|--------------------|------|-------|-------|-------|---------|---------------|-----|------|------|------|---------------------------------------------------------------------------------|
| CA5792 | orf19.5441 | <i>IPF4195</i>     | -1.0 | -1.1  | -1.1  | -1.0  | YIL031W | <i>ULP2</i>   | 1.0 | -1.5 | -1.3 | -1.5 | similar to <i>Saccharomyces cerevisiae</i> Ulp2p involved in ubiquitin-mediated |
| CA5794 | orf19.5443 | <i>IPF4191</i>     | -1.0 | -1.1  | 1.2   | 1.0   | YBL098W |               | 1.0 | -1.0 | 1.0  | 1.0  | unknown function                                                                |
| CA5795 | orf19.5444 | <i>TIM44</i>       | -1.0 | -1.1  | -1.3  | -1.2  | YIL022W | <i>TIM44</i>  | 1.0 | -1.3 | -1.3 | -1.4 | mitochondrial inner membrane import receptor                                    |
| CA5796 | orf19.5445 | <i>GLO3</i>        | -1.2 | -1.2  | -1.4  | -1.3  | YER122C | <i>GLO3</i>   | 1.0 | 1.1  | 1.1  | 1.2  | zinc finger protein                                                             |
| CA5800 | orf19.5450 | <i>IPF4175</i>     | 1.1  | -1.2  | -1.1  | -1.1  | YBR026C | <i>MRF1'</i>  | 1.0 | 1.0  | -1.4 | -1.6 | mitochondrial respiratory function (by homology)                                |
| CA5801 | orf19.5454 | <i>DAL1</i>        | 1.0  | 1.1   | 1.1   | -1.1  | YIR027C | <i>DAL1</i>   | 1.0 | -1.2 | -1.3 | -1.6 | allantoinase                                                                    |
| CA5802 | orf19.5455 | <i>IPF4164</i>     | 1.1  | 1.5   | 1.6   | 1.6   | YER072W | <i>VTC1</i>   | 1.0 | -1.1 | -1.1 | 1.1  | similar to <i>Saccharomyces cerevisiae</i> Vtc1p negative regulator of Cdc42p   |
| CA5803 | orf19.5457 | <i>IPF4163</i>     | 1.1  | -1.0  | 1.1   | 1.0   | YKL047W |               | 1.0 | -2.0 | -1.7 | -1.5 | unknown function                                                                |
| CA5804 | orf19.5459 | <i>IPF4160</i>     | 1.1  | 1.2   | 1.3   | 1.1   | YGR178C | <i>PBP1</i>   | 1.0 | 1.3  | 1.4  | 1.0  | unknown function                                                                |
| CA5805 | orf19.5463 | <i>IPF4153</i>     | -1.2 | 1.0   | 1.2   | -1.0  | YIL068C | <i>SEC6</i>   | 1.0 | 1.2  | -1.1 | -1.1 | similar to <i>Saccharomyces cerevisiae</i> Sec6p protein involved in Golgi to p |
| CA5806 | orf19.5465 | <i>IPF4149</i>     | 1.0  | -1.1  | 1.0   | -1.0  | YKL095W | <i>YJU2</i>   | 1.0 | -1.0 | 1.1  | 1.3  | unknown function                                                                |
| CA5807 | orf19.5466 | <i>RPS24</i>       | 1.3  | 1.2   | -1.1  | 1.1   | YIL069C | <i>RPS24B</i> | 1.0 | 1.9  | 1.9  | 2.7  | ribosomal protein S24.e                                                         |
| CA5813 | orf19.7460 | <i>IPF2522</i>     | 1.0  | -1.0  | 1.0   | -1.0  | YOL125W |               | 1.0 | -1.1 | -1.2 | -1.1 | unknown function                                                                |
| CA5814 | orf19.7463 | <i>IPF2521</i>     | -1.0 | 1.0   | -1.0  | -1.0  | YCR045C |               | 1.0 | 1.4  | 1.4  | 1.4  | putative protease (by homology)                                                 |
| CA5816 | orf19.7466 | <i>ACC1</i>        | -1.5 | -3.4  | -4.4  | -3.6  | YNR016C | <i>ACC1</i>   | 1.0 | -3.0 | -1.8 | -1.6 | acetyl-coenzyme-A carboxylase (by homology)                                     |
| CA5817 | orf19.7468 | <i>IPF2511</i>     | 1.0  | -1.0  | -1.1  | -1.1  | YER064C |               | 1.0 | 1.1  | 1.2  | 1.5  | unknown function                                                                |
| CA5818 | orf19.7469 | <i>ARG1</i>        | 1.1  | 1.1   | 1.2   | 1.0   | YOL058W | <i>ARG1</i>   | 1.0 | 1.4  | 1.7  | 4.4  | argininosuccinate synthetase (by homology)                                      |
| CA5821 | orf19.7475 | <i>PHO81</i>       | -1.1 | 1.0   | 1.1   | 1.1   | YGR233C | <i>PHO81</i>  | 1.0 | -1.1 | 1.1  | -1.1 | Cyclin-dependent kinase inhibitor (by homology)                                 |
| CA5822 | orf19.7477 | <i>YRB1</i>        | -1.0 | -1.1  | -1.1  | -1.1  | YDR002W | <i>YRB1</i>   | 1.0 | 1.3  | 1.6  | 2.0  | GTPase-activating protein (by homology)                                         |
| CA5823 | orf19.7478 | <i>COQ1</i>        | -1.2 | -1.2  | -1.2  | -1.1  | YBR003W | <i>COQ1</i>   | 1.0 | -1.0 | -1.1 | -1.4 | Hexaprenyl pyrophosphate synthetase (by homology)                               |
| CA5824 | orf19.7479 | <i>NTH1</i>        | -1.1 | -1.0  | 1.4   | 1.1   | YDR001C | <i>NTH1</i>   | 1.0 | 1.2  | 1.5  | 1.2  | Neutral trehalase                                                               |
| CA5828 | orf19.7483 | <i>CRM1</i>        | -1.7 | -1.3  | -1.6  | -1.3  | YGR218W | <i>CRM1</i>   | 1.0 | 1.0  | 1.2  | 1.2  | Nuclear export factor                                                           |
| CA5829 | orf19.7484 | <i>ADE1</i>        | 1.1  | 1.0   | -1.0  | 1.0   | YAR015W | <i>ADE1</i>   | 1.0 | 1.1  | -1.1 | 1.5  | phosphoribosyl-amidoimidazole-succinocarboxamide synthetase                     |
| CA5830 | orf19.7485 | <i>MRPL9</i>       | 1.1  | -1.0  | -1.2  | -1.0  | YGR220C | <i>MRPL9</i>  | 1.0 | -1.1 | -1.3 | -1.2 | Mitochondrial ribosomal protein of the large subunit (by homology)              |
| CA5831 | orf19.7486 | <i>MRPL6</i>       | 1.1  | -1.0  | -1.1  | 1.0   | YHR147C | <i>MRPL6</i>  | 1.0 | -1.2 | -1.6 | -1.7 | ribosomal protein L6 precursor, mitochondrial (by homology)                     |
| CA5833 | orf19.7488 | <i>IMP3</i>        | 1.1  | 1.0   | -1.0  | 1.0   | YHR148W | <i>IMP3</i>   | 1.0 | -1.2 | -1.1 | 1.1  | U3 small nucleolar ribonucleoprotein (by homology)                              |
| CA5834 | orf19.7489 | <i>LRG1</i>        | -1.1 | -1.2  | -1.3  | -1.2  | YDL240W | <i>LRG1</i>   | 1.0 | -1.2 | -1.1 | 1.1  | GTPase-activating protein of the rho/rac family (by homology)                   |
| CA5835 |            | <i>IPF429</i>      | 1.1  | 1.0   | 1.1   | -1.0  | YGL220W |               | 1.0 | 1.0  | 1.2  | 1.1  | unknown function                                                                |
| CA5836 | orf19.7490 | <i>IPF428</i>      | 1.1  | 1.0   | 1.2   | 1.0   | YOL137W |               | 1.0 | 1.0  | 1.1  | 1.4  | transport protein (by homology)                                                 |
| CA5837 | orf19.7491 | <i>IPF426</i>      | 1.1  | -1.0  | 1.1   | 1.1   | YLL002W | <i>REM50</i>  | 1.0 | -1.4 | -1.3 | -1.5 | unknown function                                                                |
| CA5838 | orf19.7492 | <i>IPF424</i>      | -1.1 | -1.1  | -1.1  | -1.1  | YGR002C |               | 1.0 | -1.9 | -2.0 | -2.0 | unknown function                                                                |
| CA5839 | orf19.7494 | <i>IPF423</i>      | 1.0  | 1.0   | -1.0  | -1.0  | YLR320W |               | 1.0 | -1.3 | 1.0  | 1.1  | unknown function                                                                |
| CA5841 | orf19.7497 | <i>IPF420</i>      | -1.0 | -1.1  | -1.1  | -1.0  | YGR003W |               | 1.0 | -1.3 | -1.3 | -2.1 | unknown function                                                                |
| CA5842 | orf19.7498 | <i>LEU1</i>        | -1.6 | -1.0  | -1.2  | -1.1  | YGL009C | <i>LEU1</i>   | 1.0 | 1.2  | 2.4  | 2.4  | 3-isopropylmalate dehydratase (by homology)                                     |
| CA5843 | orf19.7499 | <i>IPF416</i>      | -1.1 | 1.2   | 1.3   | 1.1   | YLR328W |               | 1.0 | -1.1 | 1.1  | 1.1  | unknown function                                                                |
| CA5844 | orf19.7500 | <i>PXA1</i>        | -1.1 | -1.4  | -1.4  | -1.2  | YPL147W | <i>PXA1</i>   | 1.0 | -1.1 | -1.4 | -1.7 | long chain fatty acid ABC transporter (by homology)                             |
| CA5845 | orf19.7501 | <i>NAP1</i>        | 1.1  | 1.1   | 1.0   | 1.0   | YKR048C | <i>NAP1</i>   | 1.0 | 1.0  | 1.2  | 1.5  | nucleosome assembly protein (by homology)                                       |
| CA5847 | orf19.7503 | <i>CDA2</i>        | -1.0 | 1.0   | -1.0  | 1.0   | YLR308W | <i>CDA2</i>   | 1.0 | -1.4 | -1.1 | -1.1 | chitin deacetylase (by homology)                                                |
| CA5848 | orf19.7504 | <i>IPF407</i>      | -1.1 | -3.2  | -4.3  | -3.0  | YGR161C |               | 1.0 | -1.5 | -1.3 | -1.1 | unknown function                                                                |
| CA5851 | orf19.7510 | <i>KIN2</i>        | 1.0  | 1.1   | 1.0   | 1.0   | YLR096W | <i>KIN2</i>   | 1.0 | -1.2 | -1.2 | 1.0  | ser/thr protein kinase (by homology)                                            |
| CA5852 |            | <i>ATP17.3</i>     | 1.2  | 1.1   | 1.1   | 1.0   | YDR377W | <i>ATP17</i>  | 1.0 | -1.1 | -1.1 | -2.1 | F1F0-ATPase complex, F1 delta subunit f, 3-prime end (by homology)              |
| CA5853 |            | <i>LSM6</i>        | 1.1  | 1.1   | 1.2   | 1.1   | YDR378C | <i>LSM6</i>   | 1.0 | -1.1 | -1.1 | -1.1 | U6 snRNA-associated Sm-like protein (by homology)                               |
| CA5854 | orf19.7511 | <i>IPF393</i>      | 1.1  | 1.2   | 1.2   | 1.1   | YJL039C | <i>NUP192</i> | 1.0 | -1.1 | -1.1 | -1.2 | similar to <i>Saccharomyces cerevisiae</i> Nup192p nucleoporin (by homology)    |
| CA5857 | orf19.7514 | <i>PCK1</i>        | 1.3  | -11.5 | -12.0 | -19.3 | YKR097W | <i>PCK1</i>   | 1.0 | -8.0 | -4.8 | -6.0 | phosphoenolpyruvate carboxykinase                                               |
| CA5862 | orf19.7520 | <i>POT11</i>       | -1.2 | -8.2  | -10.0 | -8.1  | YIL160C | <i>POT1</i>   | 1.0 | 1.2  | -1.2 | -1.5 | peroxysomal 3-ketoacyl-CoA thiolase A (by homology)                             |
| CA5865 | orf19.7523 | <i>MKC1</i>        | -1.1 | -1.2  | -1.2  | -1.1  | YHR030C | <i>SLT2</i>   | 1.0 | -1.3 | 1.0  | 1.2  | ser/thr protein kinase of MAP kinase family                                     |
| CA5867 | orf19.7529 | <i>EPL1</i>        | 1.0  | -1.0  | -1.0  | -1.0  | YFL024C | <i>EPL1</i>   | 1.0 | -1.1 | -1.4 | -1.5 | DNA-binding protein (by homology)                                               |
| CA5868 | orf19.7531 | <i>IPF351</i>      | 1.1  | 1.2   | 1.2   | 1.1   | YMR090W |               | 1.0 | -1.6 | -1.3 | -2.1 | unknown function                                                                |
| CA5871 | orf19.7538 | <i>PIF2</i>        | 1.0  | 1.1   | 1.4   | 1.0   | YHR031C | <i>RRM3</i>   | 1.0 | -1.2 | -1.1 | -1.2 | DNA helicase (by homology)                                                      |
| CA5876 | orf19.6833 | <i>IPF12082.5F</i> | -1.1 | 1.1   | -1.3  | -1.0  | YBR235W |               | 1.0 | -1.5 | -1.4 | -1.4 | bumetanide-sensitive Na-K-Cl cotransport protein, 5-prime end (by homo          |
| CA5878 | orf19.6831 | <i>PRP5</i>        | -1.1 | -1.1  | -1.2  | -1.1  | YBR237W | <i>PRP5</i>   | 1.0 | -1.2 | -1.4 | -1.3 | pre-mRNA processing RNA-helicase (by homology)                                  |
| CA5880 | orf19.6829 | <i>IPF12074</i>    | -1.0 | -1.1  | -1.1  | -1.0  | YMR282C | <i>AEP2</i>   | 1.0 | -1.4 | -1.4 | -1.6 | unknown function                                                                |
| CA5881 |            | <i>SSS1</i>        | 1.0  | 1.0   | 1.0   | -1.0  | YDR086C | <i>SSS1</i>   | 1.0 | 1.0  | -1.2 | -1.5 | ER protein-translocase complex subunit (by homology)                            |
| CA5882 | orf19.6828 | <i>RRP1</i>        | -1.0 | -1.1  | -1.1  | 1.0   | YDR087C | <i>RRP1</i>   | 1.0 | 1.3  | 1.6  | 1.8  | Involved in processing rRNA precursor species to mature rRNAs (by hor           |
| CA5883 | orf19.6827 | <i>IPF2425</i>     | 1.0  | -1.0  | -1.0  | -1.0  | YDR088C | <i>SLU7</i>   | 1.0 | -1.1 | -1.1 | -1.4 | unknown function                                                                |
| CA5884 | orf19.6826 | <i>SLF1</i>        | -1.0 | -1.0  | -1.1  | -1.0  | YDR515W | <i>SLF1</i>   | 1.0 | -1.1 | -1.2 | 1.1  | Copper homeostasis protein (by homology)                                        |
| CA5886 | orf19.6822 | <i>IPF2417</i>     | 1.1  | 1.1   | 1.2   | 1.1   | YLR128W |               | 1.0 | 1.0  | 1.1  | 1.1  | unknown function                                                                |
| CA5887 | orf19.6821 | <i>IPF2415</i>     | -1.0 | 1.0   | -1.1  | -1.1  | YLR127C | <i>APC2</i>   | 1.0 | -1.3 | -1.1 | 1.1  | similar to <i>Saccharomyces cerevisiae</i> Apc2p component of the anaphase      |
| CA5889 | orf19.6818 | <i>IPF2409</i>     | -1.1 | -1.4  | -1.7  | -1.4  | YLR419W |               | 1.0 | -1.4 | -1.4 | -1.8 | RNA-dependent ATPase (by homology)                                              |
| CA5891 | orf19.6816 | <i>IPF2400</i>     | -1.0 | 1.2   | 1.2   | 1.2   | YJR096W |               | 1.0 | -1.2 | -1.5 | -1.6 | putative aldehyde reductase (by homology)                                       |
| CA5892 | orf19.6814 | <i>GAP1</i>        | 1.1  | 1.9   | 2.1   | 2.1   | YGR192C | <i>TDH3</i>   | 1.0 | -1.1 | 1.4  | 1.9  | Glyceraldehyde-3-phosphate dehydrogenase                                        |

|        |            |                  |      |      |      |      |         |              |     |      |      |      |                                                                             |
|--------|------------|------------------|------|------|------|------|---------|--------------|-----|------|------|------|-----------------------------------------------------------------------------|
| CA5894 | orf19.6812 | <i>PMT2</i>      | 1.2  | 1.6  | 1.7  | 1.7  | YAL023C | <i>PMT2</i>  | 1.0 | -1.4 | -1.2 | 1.1  | O-D-mannosyltransferase (by homology)                                       |
| CA5895 | orf19.6811 | <i>ISA2</i>      | 1.1  | 1.1  | 1.1  | 1.0  | YPR067W | <i>ISA2</i>  | 1.0 | -1.6 | -1.4 | -1.4 | Mitochondrial protein required for iron metabolism (by homology)            |
| CA5896 | orf19.6810 | <i>TPD3</i>      | -1.3 | -1.1 | -1.2 | -1.0 | YAL016W | <i>TPD3</i>  | 1.0 | -1.3 | -1.3 | -1.0 | Ser/thr protein phosphatase (by homology)                                   |
| CA5897 | orf19.6809 | <i>IPF2384</i>   | 1.0  | 1.3  | 1.4  | 1.2  | YKL128C | <i>PMU1</i>  | 1.0 | -2.2 | -2.2 | -1.7 | unknown function                                                            |
| CA5901 | orf19.6805 | <i>IPF2374</i>   | 1.0  | 1.0  | -1.0 | 1.0  | YDR089W |              | 1.0 | 1.1  | -1.1 | -1.1 | unknown function                                                            |
| CA5902 | orf19.6804 | <i>SRP68</i>     | -1.4 | -1.6 | -1.8 | -1.3 | YPL243W | <i>SRP68</i> | 1.0 | 1.0  | 1.3  | 1.3  | SIGNAL RECOGNITION PARTICLE 68 (by homology)                                |
| CA5903 | orf19.6803 | <i>IPF5942</i>   | 1.1  | 1.1  | 1.1  | 1.0  | YPL244C | <i>HUT1</i>  | 1.0 | 1.1  | 1.3  | 1.3  | transmembrane sugar transporter (by homology)                               |
| CA5904 | orf19.6802 | <i>IPF5944</i>   | 1.1  | 1.1  | 1.5  | 1.2  | YNL326C |              | 1.0 | -1.0 | 1.1  | 1.1  | Unknown function                                                            |
| CA5905 | orf19.6801 | <i>RPD32</i>     | -1.3 | -1.0 | -1.1 | -1.0 | YNL330C | <i>RPD3</i>  | 1.0 | -1.1 | -1.1 | -1.2 | histone deacetylase B (by homology)                                         |
| CA5906 | orf19.6800 | <i>IPF5949</i>   | -1.0 | 1.0  | 1.1  | 1.1  | YPL188W | <i>POS5</i>  | 1.0 | -1.1 | -1.0 | 1.2  | unknown function                                                            |
| CA5907 | orf19.6798 | <i>SSN6</i>      | -1.1 | 1.0  | -1.3 | -1.1 | YBR112C | <i>CYC8</i>  | 1.0 | -1.1 | -1.1 | -1.2 | transcriptional repressor (by homology)                                     |
| CA5909 | orf19.6796 | <i>YSA1</i>      | 1.1  | 1.0  | 1.1  | 1.0  | YBR111C | <i>YSA1</i>  | 1.0 | 1.2  | 1.4  | -1.0 | sugar-nucleotide hydrolase (by homology)                                    |
| CA5913 | orf19.6792 | <i>RRD1</i>      | -1.0 | 1.0  | -1.0 | 1.0  | YIL153W | <i>RRD1</i>  | 1.0 | 1.1  | 1.3  | 1.3  | Phosphotyrosyl phosphatase activator involved in cell cycle progression     |
| CA5915 | orf19.6790 | <i>IPF10735</i>  | 1.1  | 1.0  | 1.1  | -1.1 | YBR212W | <i>NGR1</i>  | 1.0 | -1.1 | -1.3 | -1.3 | similar to Saccharomyces cerevisiae Ngr1p negative growth regulatory R      |
| CA5916 | orf19.6789 | <i>IPF19818</i>  | -1.0 | -1.0 | -1.0 | -1.0 | YOR373W | <i>NUD1</i>  | 1.0 | -1.2 | -1.4 | -1.5 | similar to Saccharomyces cerevisiae Nud1p cell cycle regulatory protein     |
| CA5918 | orf19.6787 | <i>ERV14</i>     | 1.3  | 1.2  | 1.5  | 1.2  | YGL054C | <i>ERV14</i> | 1.0 | -1.8 | 1.2  | 1.1  | membrane protein                                                            |
| CA5920 | orf19.6785 | <i>RPS12</i>     | 1.4  | 1.1  | 1.3  | 1.4  | YOR369C | <i>RPS12</i> | 1.0 | 2.5  | 3.6  | 3.4  | acidic ribosomal protein S12 (by homology)                                  |
| CA5922 | orf19.6783 | <i>MRS6</i>      | -1.2 | -1.3 | -1.5 | -1.1 | YOR370C | <i>MRS6</i>  | 1.0 | 1.1  | 1.5  | 1.3  | geranylgeranyltransferase regulatory subunit                                |
| CA5925 | orf19.6780 | <i>MET8</i>      | -1.1 | -1.3 | -1.2 | -1.1 | YBR213W | <i>MET8</i>  | 1.0 | -1.1 | 1.0  | -1.1 | Siroheme synthase (by homology)                                             |
| CA5926 | orf19.6779 | <i>PRO2</i>      | -1.1 | -1.1 | -1.1 | -1.1 | YOR323C | <i>PRO2</i>  | 1.0 | 1.2  | 1.4  | 1.7  | Proline biosynthetic enzyme (by homology)                                   |
| CA5927 | orf19.6778 | <i>DRS22</i>     | -1.1 | 1.0  | 1.1  | 1.0  | YAL026C | <i>DRS2</i>  | 1.0 | -1.0 | 1.1  | 1.4  | Membrane-spanning Ca-ATPase (by homology)                                   |
| CA5929 | orf19.6776 | <i>GCD2</i>      | -1.2 | -1.1 | -1.3 | -1.1 | YGR083C | <i>GCD2</i>  | 1.0 | 1.1  | 1.2  | 1.2  | Translation initiation factor eIF2B, 71 kDa (delta) subunit (by homology)   |
| CA5930 | orf19.6773 | <i>CM29.EXON</i> | -1.6 | 1.3  | -1.5 | -1.2 | YHL030W | <i>ECM29</i> | 1.0 | -1.3 | -1.4 | -1.2 | Involved in cell wall biogenesis and architecture, exon 2 (by homology)     |
| CA5932 | orf19.6771 | <i>UBI4</i>      | 1.0  | 1.0  | -1.0 | 1.0  | YLL039C | <i>UBI4</i>  | 1.0 | 1.7  | 1.8  | 1.5  | Polyubiquitin                                                               |
| CA5933 | orf19.6770 | <i>IPF2804</i>   | -1.0 | 1.2  | 1.4  | 1.1  | YLL038C | <i>ENT4</i>  | 1.0 | 1.1  | 1.1  | -1.0 | unknown function                                                            |
| CA5934 | orf19.6769 | <i>IPF2802</i>   | -1.1 | -1.2 | -1.2 | -1.1 | YHL029C |              | 1.0 | -1.3 | -1.2 | -1.1 | unknown function                                                            |
| CA5935 | orf19.6766 | <i>IPF2798</i>   | 1.0  | -1.1 | -1.1 | -1.0 | YNL175C | <i>NOP13</i> | 1.0 | 1.0  | 1.4  | 1.6  | unknown function                                                            |
| CA5937 | orf19.6760 | <i>IPF2784</i>   | -1.2 | -1.2 | -2.0 | -1.4 | YER132C | <i>PMD1</i>  | 1.0 | -1.3 | 1.0  | 1.2  | unknown function                                                            |
| CA5940 | orf19.6757 | <i>IPF3485</i>   | 1.0  | -1.2 | -1.3 | -1.0 | YOR120W | <i>GCY1</i>  | 1.0 | 1.0  | -1.1 | -1.5 | aldo/keto reductase (by homology)                                           |
| CA5941 | orf19.6756 | <i>IPF3486</i>   | 1.2  | 1.3  | 1.9  | 1.4  | YGL198W |              | 1.0 | 1.3  | 1.1  | 1.4  | unknown function                                                            |
| CA5942 | orf19.6755 | <i>DLD2</i>      | 1.0  | 1.2  | 1.3  | 1.1  | YDL174C | <i>DLD1</i>  | 1.0 | -2.0 | -2.6 | -2.0 | D-lactate ferricytochrome C oxidoreductase (by homology)                    |
| CA5944 | orf19.6753 | <i>IPF3491</i>   | 1.1  | 1.0  | 1.0  | 1.0  | YBR062C |              | 1.0 | -1.1 | 1.1  | 1.2  | unknown function                                                            |
| CA5945 | orf19.6752 | <i>IPF3492</i>   | -1.0 | -1.0 | -1.1 | -1.0 | YDR041W | <i>RSM10</i> | 1.0 | -1.5 | -1.1 | -1.1 | unknown function                                                            |
| CA5946 | orf19.6751 | <i>IPF3493</i>   | -1.0 | -1.0 | -1.0 | -1.1 | YBR061C |              | 1.0 | 1.1  | 1.2  | 1.5  | unknown function                                                            |
| CA5947 | orf19.6749 | <i>KRS1</i>      | -1.4 | -1.2 | -1.4 | -1.4 | YDR037W | <i>KRS1</i>  | 1.0 | 1.4  | 1.6  | 3.8  | Lysyl-tRNA synthetase (by homology)                                         |
| CA5949 | orf19.6747 | <i>IPF3498</i>   | 1.1  | 1.1  | 1.2  | 1.3  | YDR051C |              | 1.0 | 1.1  | 1.2  | 1.6  | unknown function                                                            |
| CA5950 | orf19.6745 | <i>TPI1</i>      | 1.1  | 2.2  | 2.3  | 2.2  | YDR050C | <i>TPI1</i>  | 1.0 | 1.8  | 2.3  | 3.7  | Triose phosphate isomerase                                                  |
| CA5951 | orf19.6744 | <i>IPF3500</i>   | 1.1  | 1.2  | 1.3  | 1.2  | YMR262W |              | 1.0 | -1.3 | 1.0  | 1.1  | unknown function                                                            |
| CA5952 | orf19.6742 | <i>IPF3503</i>   | 1.1  | -1.0 | 1.0  | -1.0 | YMR277W | <i>FCP1</i>  | 1.0 | -1.3 | 1.1  | -1.2 | similar to Saccharomyces cerevisiae Fcp1p TFIIF interacting component       |
| CA5954 | orf19.6740 | <i>IPF3508</i>   | -1.0 | 1.2  | 1.2  | 1.1  | YLL036C | <i>PRP19</i> | 1.0 | -1.6 | -1.6 | -1.2 | unknown function                                                            |
| CA5955 | orf19.6739 | <i>IPF3510</i>   | -1.2 | -1.3 | -1.7 | -1.5 | YMR278W |              | 1.0 | -1.1 | -1.0 | -1.1 | unknown function                                                            |
| CA5956 | orf19.6738 | <i>VAN1</i>      | -1.2 | -1.1 | -1.1 | -1.1 | YML115C | <i>VAN1</i>  | 1.0 | 1.1  | 1.4  | 1.4  | Vanadate resistance protein                                                 |
| CA5957 | orf19.7546 | <i>RRP3.3EOC</i> | -1.2 | -1.3 | -1.3 | -1.2 | YHR065C | <i>RRP3</i>  | 1.0 | -1.2 | 1.2  | 1.1  | RNA-dependent ATPase, helicase, required for maturation of 35S primar       |
| CA5958 | orf19.7547 | <i>PIB1</i>      | -1.1 | 1.0  | -1.0 | -1.0 | YDR313C | <i>PIB1</i>  | 1.0 | 1.0  | 1.1  | 1.1  | phosphatidylinositol(3)-phosphate binding protein (by homology)             |
| CA5959 | orf19.7548 | <i>SRB7</i>      | 1.1  | -1.1 | -1.0 | -1.1 | YDR308C | <i>SRB7</i>  | 1.0 | -1.5 | -1.8 | -1.5 | DNA-directed RNA polymerase II holoenzyme and kornberg s mediator (         |
| CA5962 | orf19.7551 | <i>ALO1</i>      | -1.2 | 1.1  | 1.3  | 1.2  | YML086C | <i>ALO1</i>  |     |      |      |      | D-arabinono-1,4-lactone oxidase (by homology)                               |
| CA5963 | orf19.7552 | <i>IPF966</i>    | -1.1 | -1.2 | -1.3 | -1.2 | YML093W |              | 1.0 | -1.2 | -1.1 | -1.0 | unknown function                                                            |
| CA5967 | orf19.7558 | <i>IPF955</i>    | -1.0 | -1.0 | -1.1 | -1.2 | YER047C | <i>SAP1</i>  | 1.0 | -1.2 | -1.2 | 1.3  | member of the AAA ATPase family of proteins (by homology)                   |
| CA5969 | orf19.7563 | <i>BET2</i>      | 1.0  | 1.0  | -1.0 | -1.1 | YPR176C | <i>BET2</i>  | 1.0 | 1.3  | 1.3  | 1.3  | beta subunit of geranylgeranyl transferase type2                            |
| CA5970 | orf19.7564 | <i>DPB2</i>      | -1.0 | -1.0 | -1.1 | -1.0 | YPR175W | <i>DPB2</i>  | 1.0 | 1.0  | 1.2  | 1.2  | DNA-directed DNA polymerase epsilon, subunit B (by homology)                |
| CA5973 | orf19.7567 | <i>IPF931</i>    | 1.1  | 1.1  | 1.0  | 1.0  | YDR124W |              | 1.0 | -1.0 | -1.1 | -1.2 | unknown function                                                            |
| CA5974 | orf19.7568 | <i>IPF930</i>    | -1.0 | 1.0  | 1.1  | 1.1  | YOR313C | <i>SPS4</i>  | 1.0 | -1.1 | -1.1 | -1.0 | unknown function                                                            |
| CA5975 | orf19.7569 | <i>SIK1</i>      | 1.1  | 1.1  | 1.1  | 1.0  | YLR197W | <i>SIK1</i>  | 1.0 | 1.7  | 2.3  | 2.6  | nucleolar protein involved in pre-rRNA processing (by homology)             |
| CA5976 | orf19.7570 | <i>IPF928</i>    | -1.0 | 1.1  | 1.1  | -1.0 | YDL170W | <i>UGA3</i>  | 1.0 | 1.0  | 1.1  | 1.3  | zinc-finger transcription factor of the Zn(2)-Cys(6) binuclear cluster doma |
| CA5977 | orf19.7571 | <i>UBC4.3</i>    | 1.3  | 1.1  | 1.1  | 1.1  | YBR082C | <i>UBC4</i>  | 1.0 | 1.1  | 1.7  | 1.7  | E2 ubiquitin-conjugating enzyme, 3-prime end                                |
| CA5978 | orf19.7572 | <i>SPT7</i>      | -1.1 | -1.1 | -1.3 | -1.0 | YBR081C | <i>SPT7</i>  | 1.0 | -1.6 | -1.5 | -1.2 | transcription factor, member of the histone acetyltransferase SAGA comp     |
| CA5981 | orf19.7577 | <i>MSS51</i>     | -1.1 | -1.1 | -1.1 | -1.1 | YLR203C | <i>MSS51</i> | 1.0 | -1.1 | -1.3 | -1.5 | involved in maturation of COX1 and COB mRNA (by homology)                   |
| CA5982 | orf19.7578 | <i>IPF915</i>    | 1.0  | 1.1  | -1.0 | 1.1  | YDR057W |              | 1.0 | -1.3 | -1.2 | -1.2 | unknown function                                                            |
| CA5984 | orf19.7581 | <i>CUS1</i>      | -1.1 | 1.0  | 1.0  | 1.1  | YMR240C | <i>CUS1</i>  | 1.0 | -1.3 | -1.3 | -1.2 | spliceosome associated protein (by homology)                                |
| CA5986 | orf19.7585 | <i>INO1</i>      | 1.0  | 1.5  | 2.1  | 1.3  | YJL153C | <i>INO1</i>  | 1.0 | -1.6 | -1.7 | -1.6 | myo-inositol-1-phosphate synthase                                           |
| CA5987 | orf19.7586 | <i>CHT3</i>      | 1.3  | 1.2  | 1.3  | 1.1  | YLR286C | <i>CTS1</i>  | 1.0 | 1.3  | 2.3  | 1.9  | chitinase 3 precursor                                                       |

|        |            |                 |      |      |      |      |         |               |     |      |      |      |                                                                            |
|--------|------------|-----------------|------|------|------|------|---------|---------------|-----|------|------|------|----------------------------------------------------------------------------|
| CA5988 | orf19.7588 | <i>IPF693</i>   | 1.1  | 1.1  | 1.0  | -1.0 | YOR305W |               | 1.0 | 1.2  | 1.2  | 1.3  | unknown function                                                           |
| CA5992 | orf19.7592 | <i>FAA4</i>     | -1.1 | -2.2 | -2.5 | -2.3 | YMR246W | <i>FAA4</i>   | 1.0 | 1.1  | 1.4  | 2.0  | long-chain fatty acid--CoA ligase and synthetase 4 (by homology)           |
| CA5993 | orf19.7593 | <i>ASP1</i>     | -1.3 | -2.5 | -2.7 | -2.5 | YDR321W | <i>ASP1</i>   | 1.0 | -1.4 | -1.1 | 1.2  | L-asparaginase (by homology)                                               |
| CA5998 | orf19.7598 | <i>IPF670</i>   | 1.1  | 1.0  | 1.0  | -1.0 | YOR023C | <i>AHC1</i>   | 1.0 | -1.0 | 1.0  | 1.1  | unknown function                                                           |
| CA5999 | orf19.7599 | <i>IPF668</i>   | 1.0  | -1.0 | 1.0  | 1.0  | YDR398W |               | 1.0 | -1.9 | -1.8 | -1.4 | unknown function                                                           |
| CA6000 | orf19.7600 | <i>FDH11.3</i>  | 1.0  | 1.9  | 1.8  | 2.0  | YDL168W | <i>SFA1</i>   | 1.0 | 1.3  | 1.5  | 1.5  | glutathione-dependent formaldehyde dehydrogenase, 3-prime end (by hc       |
| CA6001 | orf19.7601 | <i>IPF662</i>   | 1.0  | 1.0  | -1.1 | 1.0  | YGL136C |               | 1.0 | 1.0  | 1.1  | 1.0  | unknown function                                                           |
| CA6002 | orf19.7602 | <i>IPF661</i>   | 1.1  | 1.3  | 1.2  | 1.2  | YDR214W |               | 1.0 | -1.3 | -1.4 | -1.5 | unknown function                                                           |
| CA6005 | orf19.7605 | <i>PUP1</i>     | 1.1  | 1.3  | 1.4  | 1.1  | YOR157C | <i>PUP1</i>   | 1.0 | 1.1  | 1.4  | 1.3  | 20S proteasom ebeta2 subunit (by homology)                                 |
| CA6009 | orf19.7610 | <i>IPF643</i>   | -1.1 | -1.5 | -1.9 | -1.5 | YER075C | <i>PTP3</i>   | 1.0 | 1.0  | 1.0  | 1.1  | similar to Saccharomyces cerevisiae Ptp3p protein tyrosine phosphatase     |
| CA6010 | orf19.7611 | <i>TRX1</i>     | 1.5  | 1.5  | 1.8  | 1.7  | YLR043C | <i>TRX1</i>   | 1.0 | 1.3  | 1.1  | -1.1 | thioredoxin (by homology)                                                  |
| CA6011 | orf19.7612 | <i>CTM1</i>     | -1.0 | 1.4  | 2.0  | 1.4  | YHR109W | <i>CTM1</i>   | 1.0 | -2.3 | -1.6 | -1.6 | cytochrome c methyltransferase (by homology)                               |
| CA6012 | orf19.7613 | <i>HCR1</i>     | -1.0 | 1.0  | -1.2 | -1.0 | YLR192C | <i>HCR1</i>   | 1.0 | -1.2 | -1.0 | 1.1  | putative translation initiation factor 3 subunit (by homology)             |
| CA6014 | orf19.7615 | <i>TRS31</i>    | 1.0  | -1.1 | 1.0  | -1.0 | YDR472W | <i>TRS31</i>  | 1.0 | -1.4 | -1.6 | -1.3 | targeting complex (TRAPP) component involved in ER to Golgi membran        |
| CA6015 | orf19.7617 | <i>ARD1</i>     | 1.1  | -1.0 | -1.0 | 1.0  | YHR013C | <i>ARD1</i>   | 1.0 | 1.0  | -1.0 | -1.0 | protein N-acetyltransferase subunit (by homology)                          |
| CA6016 | orf19.7618 | <i>IPF630</i>   | 1.1  | 1.0  | -1.1 | 1.0  | YOR145C |               | 1.0 | 1.1  | 1.4  | 1.8  | unknown function                                                           |
| CA6018 | orf19.7620 | <i>IPF627</i>   | 1.1  | 1.0  | -1.0 | 1.0  | YOR148C | <i>SPP2</i>   | 1.0 | 1.0  | 1.1  | -1.0 | unknown function                                                           |
| CA6019 | orf19.7621 | <i>IPF625</i>   | 1.0  | -1.0 | -1.0 | -1.0 | YOR144C | <i>EFD1</i>   | 1.0 | -1.1 | -1.1 | -1.1 | unknown function                                                           |
| CA6020 | orf19.7622 | <i>SPT3</i>     | -1.0 | -1.0 | 1.0  | 1.0  | YDR392W | <i>SPT3</i>   | 1.0 | -1.1 | -1.1 | 1.0  | transcription factor                                                       |
| CA6021 | orf19.7624 | <i>BFR2</i>     | 1.0  | -1.1 | -1.1 | -1.1 | YDR299W | <i>BFR2</i>   | 1.0 | -1.1 | -1.0 | 1.1  | involved in protein transport steps at the Brefeldin A block (by homology) |
| CA6023 | orf19.7626 | <i>CDC33</i>    | 1.1  | 1.0  | 1.1  | 1.0  | YOL139C | <i>CDC33</i>  | 1.0 | 1.3  | 1.6  | 1.7  | translation initiation factor eIF4E, cap binding protein                   |
| CA6024 | orf19.7627 | <i>IPF615</i>   | -1.2 | -1.1 | -1.0 | -1.0 | YNL320W |               | 1.0 | -1.0 | 1.0  | 1.1  | unknown function                                                           |
| CA6025 | orf19.7629 | <i>IPF614</i>   | -1.0 | -1.1 | -1.0 | -1.1 | YOL138C |               | 1.0 | -1.1 | -1.0 | 1.0  | unknown function                                                           |
| CA6026 | orf19.7631 | <i>IPF610</i>   | -1.0 | 1.0  | -1.0 | -1.0 | YDR489W |               | 1.0 | 1.6  | 2.1  | 2.7  | unknown function                                                           |
| CA6028 | orf19.7634 | <i>IPF607</i>   | -1.0 | 1.0  | -1.1 | 1.0  | YDL003W | <i>MCD1</i>   | 1.0 | 1.0  | 1.2  | 1.3  | unknown function                                                           |
| CA6029 | orf19.7635 | <i>DRS1</i>     | -1.0 | -1.4 | -1.9 | -1.6 | YLL008W | <i>DRS1</i>   | 1.0 | -1.2 | 1.1  | 1.2  | ATP dependent RNA helicase (by homology)                                   |
| CA6031 | orf19.7638 | <i>PRO1</i>     | 1.0  | -1.1 | -1.0 | -1.0 | YDR300C | <i>PRO1</i>   | 1.0 | -1.4 | 1.1  | 1.3  | glutamate 5-kinase (by homology)                                           |
| CA6032 | orf19.7642 | <i>IPF596</i>   | -1.1 | 1.0  | 1.0  | -1.1 | YDR495C | <i>VPS3</i>   | 1.0 | -1.3 | -1.4 | -1.2 | similar to Saccharomyces cerevisiae Vps3p vacuolar sorting protein         |
| CA6033 | orf19.7643 | <i>COQ2</i>     | 1.2  | 1.2  | 1.6  | 1.3  | YNR041C | <i>COQ2</i>   | 1.0 | 1.0  | -1.1 | -1.1 | para-hydroxybenzoate:polyprenyl transferase (by homology)                  |
| CA6034 | orf19.7644 | <i>APC11</i>    | -1.2 | -1.1 | 1.1  | -1.0 | YDL008W | <i>APC11</i>  | 1.0 | -1.3 | -1.2 | -1.1 | subunit of the anaphase promoting complex (by homology)                    |
| CA6035 | orf19.7645 | <i>BPL1</i>     | -1.1 | 1.0  | 1.0  | -1.0 | YDL141W | <i>BPL1</i>   | 1.0 | -1.5 | -1.1 | -1.1 | biotin holocarboxylase synthetase (by homology)                            |
| CA6036 | orf19.7646 | <i>IPF585</i>   | 1.1  | -1.0 | 1.0  | 1.1  | YHR034C |               | 1.0 | -1.8 | -1.7 | -1.6 | unknown function                                                           |
| CA6038 | orf19.7650 | <i>LTV1</i>     | 1.0  | -1.1 | -1.1 | -1.1 | YKL143W | <i>LTV1</i>   | 1.0 | 1.3  | 1.7  | 2.0  | low-temperature viability protein (by homology)                            |
| CA6039 | orf19.7652 | <i>CKA1</i>     | -1.1 | 1.0  | -1.0 | 1.0  | YIL035C | <i>CKA1</i>   | 1.0 | -1.1 | 1.0  | 1.2  | casein kinase II, catalytic alpha chain (by homology)                      |
| CA6040 | orf19.7654 | <i>CPR6</i>     | -1.2 | 1.1  | -1.3 | -1.1 | YLR216C | <i>CPR6</i>   | 1.0 | -1.2 | 1.1  | -1.1 | cyclophylin (by homology)                                                  |
| CA6041 | orf19.7655 | <i>RPO21</i>    | 1.0  | -1.0 | -1.0 | 1.1  | YDL140C | <i>RPO21</i>  | 1.0 | -1.8 | -1.7 | -1.4 | DNA-directed RNA polymerase II, 215 KD subunit (by homology)               |
| CA6042 | orf19.7657 | <i>IPF4924</i>  | 1.0  | 1.0  | -1.0 | -1.1 | YNL282W | <i>POP3</i>   | 1.0 | -1.1 | 1.1  | 1.2  | unknown function                                                           |
| CA6043 | orf19.7658 | <i>RFC4</i>     | 1.1  | 1.1  | 1.0  | -1.0 | YOL094C | <i>RFC4</i>   | 1.0 | 1.2  | 1.2  | 1.3  | DNA replication factor C (by homology)                                     |
| CA6044 | orf19.7660 | <i>IPF4928</i>  | -1.0 | -1.1 | -1.1 | -1.0 | YDR484W | <i>SAC2</i>   | 1.0 | -1.6 | -1.4 | -1.4 | similar to Saccharomyces cerevisiae Sac2p suppressor of actin mutation     |
| CA6045 | orf19.7661 | <i>IPF4929</i>  | -1.1 | -1.0 | -1.0 | -1.1 | YOL095C | <i>HMI1</i>   | 1.0 | 1.0  | 1.2  | 1.4  | similar to Saccharomyces cerevisiae Hmi1p mitochondrial DNA helicase       |
| CA6046 | orf19.7662 | <i>IPF4931</i>  | 1.0  | 1.0  | -1.1 | -1.2 | YDR289C | <i>RTT103</i> | 1.0 | -1.0 | 1.0  | 1.0  | unknown function                                                           |
| CA6047 | orf19.7663 | <i>IPF4933</i>  | 1.0  | -1.1 | -1.0 | 1.0  | YCR086W | <i>CSM1</i>   | 1.0 | 1.1  | -1.1 | -1.0 | unknown function                                                           |
| CA6049 | orf19.7665 | <i>IPF4935</i>  | 1.0  | 1.1  | -1.0 | -1.0 | YJL003W |               | 1.0 | 1.0  | 1.1  | 1.0  | unknown function                                                           |
| CA6051 | orf19.7667 | <i>IPF4940</i>  | 1.0  | 1.0  | -1.0 | -1.0 | YOR126C | <i>IAH1</i>   | 1.0 | -1.4 | -1.2 | -1.4 | unknown function                                                           |
| CA6052 | orf19.7668 | <i>IPF4942</i>  | -1.2 | -1.5 | -1.5 | -1.3 | YBR299W | <i>MAL32</i>  | 1.0 | -1.1 | 1.1  | -1.2 | similar to Saccharomyces cerevisiae Mal32p alpha-glucosidase (by hom       |
| CA6053 | orf19.7670 | <i>IPF4949</i>  | 1.0  | -1.0 | -1.0 | -1.1 | YNL321W |               | 1.0 | -1.2 | -1.3 | -1.1 | unknown function                                                           |
| CA6054 | orf19.7672 | <i>IPF4952</i>  | 1.0  | -1.0 | 1.1  | -1.0 | YDR411C |               | 1.0 | -1.3 | 1.1  | -1.2 | unknown function                                                           |
| CA6056 | orf19.7675 | <i>IPF4955</i>  | 1.1  | -1.0 | 1.1  | -1.0 | YGR076C | <i>MRPL25</i> | 1.0 | -3.0 | -5.8 | -4.0 | similar to Saccharomyces cerevisiae Mrpl25p ribosomal protein YmL25, 1     |
| CA6057 | orf19.7676 | <i>IPF4959</i>  | 1.3  | 2.0  | 2.8  | 1.8  | YDL246C |               | 1.0 | -1.1 | -1.1 | -1.4 | D-xylulose reductase (by homology)                                         |
| CA6058 | orf19.7678 | <i>ATP16</i>    | 1.0  | -1.0 | 1.0  | -1.0 | YDL004W | <i>ATP16</i>  | 1.0 | 1.2  | 1.0  | -1.5 | F1F0-ATPase complex, F1 delta subunit                                      |
| CA6060 | orf19.6008 | <i>IPF8301</i>  | -1.3 | -1.3 | -1.4 | -1.4 | YLL032C |               | 1.0 | -1.3 | -1.4 | -1.4 | unknown function                                                           |
| CA6063 | orf19.6003 | <i>IPF8311</i>  | -1.1 | -1.1 | -1.1 | -1.0 | YLR094C | <i>GIS3</i>   | 1.0 | -1.5 | -1.3 | -1.1 | unknown function                                                           |
| CA6064 | orf19.6002 | <i>RPL81</i>    | 1.2  | 1.0  | -1.0 | 1.0  | YLL045C | <i>RPL8B</i>  | 1.0 | 1.7  | 2.4  | 3.1  | 60S ribosomal protein L7a.e.B (by homology)                                |
| CA6066 | orf19.6000 | <i>CDR1</i>     | -1.1 | 2.0  | 1.6  | 2.0  | YOR153W | <i>PDR5</i>   | 1.0 | -1.2 | 1.6  | 1.5  | multidrug resistance protein (by homology)                                 |
| CA6067 | orf19.5999 | <i>DYN1</i>     | -1.0 | 1.2  | 1.2  | 1.0  | YKR054C | <i>DYN1</i>   | 1.0 | -1.1 | -1.3 | -1.3 | dynein heavy chain, cytosolic (by homology)                                |
| CA6068 |            | <i>RPS19A.3</i> | 1.4  | 1.1  | -1.0 | 1.1  | YOL121C | <i>RPS19A</i> | 1.0 | 1.9  | 1.9  | 2.7  | ribosomal protein S19.e, 3-prime end (by homology)                         |
| CA6069 | orf19.5995 | <i>IPF4847</i>  | -1.0 | 1.1  | 1.1  | -1.0 | YOR197W |               | 1.0 | 1.1  | 1.3  | 1.6  | unknown function                                                           |
| CA6070 | orf19.5994 | <i>IPF4842</i>  | 1.1  | 1.2  | 1.6  | 1.2  | YCR027C | <i>RSG1</i>   | 1.0 | -3.1 | -2.5 | -1.7 | similar to Saccharomyces cerevisiae Rsg1p ras-related GTP-binding prot     |
| CA6072 | orf19.5991 | <i>DBP10</i>    | -1.3 | -1.5 | -2.1 | -1.6 | YDL031W | <i>DBP10</i>  | 1.0 | 1.1  | 1.3  | 1.8  | Putative ATP-dependent RNA helicase (by homology)                          |
| CA6073 | orf19.5989 | <i>HRP1</i>     | 1.1  | 1.0  | 1.1  | 1.0  | YOL123W | <i>HRP1</i>   | 1.0 | 1.2  | 1.5  | 1.4  | Nuclear polyadenylated RNA-binding protein (by homology)                   |
| CA6074 | orf19.5987 | <i>IPF11</i>    | 1.0  | -1.0 | -1.0 | 1.0  | YOL124C |               | 1.0 | -1.1 | -1.1 | -1.0 | unknown function                                                           |

|        |             |                    |      |      |      |      |         |               |     |      |      |      |                                                                               |
|--------|-------------|--------------------|------|------|------|------|---------|---------------|-----|------|------|------|-------------------------------------------------------------------------------|
| CA6075 | orf19.5986  | <i>THI4</i>        | -1.0 | 1.0  | 1.0  | -1.1 | YGR144W | <i>THI4</i>   | 1.0 | 1.1  | 1.0  | 1.3  | Thiazole biosynthetic enzyme precursor (by homology)                          |
| CA6076 | orf19.5985  | <i>PAC10.3</i>     | 1.1  | 1.0  | -1.1 | -1.0 | YGR078C | <i>PAC10</i>  | 1.0 | -1.9 | -1.1 | 1.1  | Non-native Actin Binding Complex Component, 3-prime end (by homolog           |
| CA6077 | orf19.5984  | <i>IPF16</i>       | -1.0 | -1.1 | -1.0 | 1.0  | YOL073C |               | 1.0 | 1.0  | -1.0 | 1.1  | unknown function                                                              |
| CA6079 | orf19.5982  | <i>RPL18.EXON2</i> | -1.0 | 1.1  | 1.1  | 1.1  | YOL120C | <i>RPL18A</i> | 1.0 | -1.5 | -1.5 | -1.2 | Ribosomal Protein RPL18B (large subunit), exon 2 (by homology)                |
| CA6082 | orf19.5977  | <i>CEM1</i>        | -1.1 | -1.1 | -1.2 | -1.0 | YER061C | <i>CEM1</i>   | 1.0 | -1.6 | 1.0  | 1.4  | 3-oxoacyl-[acyl-carrier-protein]-synthase (by homology)                       |
| CA6083 | orf19.5976  | <i>IPF26</i>       | 1.0  | -1.0 | 1.0  | 1.1  | YPR152C |               | 1.0 | -1.3 | -1.1 | -1.2 | unknown function                                                              |
| CA6085 | orf19.5974  | <i>IPF32</i>       | -1.0 | 1.0  | -1.2 | -1.1 | YDL149W | <i>APG9</i>   | 1.0 | -1.6 | -1.4 | -1.5 | similar to <i>Saccharomyces cerevisiae</i> Apg9p integral membrane protein re |
| CA6086 | orf19.5973  | <i>PHB2</i>        | -1.0 | -1.2 | -1.3 | 1.0  | YGR231C | <i>PHB2</i>   | 1.0 | 1.2  | 1.1  | -1.0 | Mitochondrial protein, prohibitin homolog (by homology)                       |
| CA6087 | orf19.5971  | <i>YHV1</i>        | -1.0 | -1.1 | -1.1 | -1.0 | YHR151C |               | 1.0 | -1.0 | -1.1 | -1.1 | unknown function                                                              |
| CA6088 | orf19.5970  | <i>HPR5</i>        | -1.2 | -1.1 | -1.2 | -1.1 | YJL092W | <i>HPR5</i>   | 1.0 | -1.7 | -1.7 | -1.8 | ATP-dependent DNA Helicase (by homology)                                      |
| CA6089 | orf19.5968  | <i>RDI1</i>        | 1.2  | -1.0 | -1.0 | 1.1  | YDL135C | <i>RDI1</i>   | 1.0 | -1.7 | -1.4 | -1.6 | Rho GDP dissociation inhibitor (by homology)                                  |
| CA6090 | orf19.5967  | <i>IPF44</i>       | -1.2 | -1.2 | -1.2 | -1.2 | YDL189W |               | 1.0 | -1.3 | -1.1 | -1.1 | unknown function                                                              |
| CA6091 | orf19.5965  | <i>UFD2</i>        | -1.4 | 1.0  | 1.0  | 1.0  | YDL190C | <i>UFD2</i>   | 1.0 | -1.0 | 1.0  | 1.2  | Ubiquitin fusion degradation protein 2 (by homology)                          |
| CA6092 |             | <i>RPL35.3</i>     | 1.6  | 1.2  | 1.7  | 1.5  | YDL191W | <i>RPL35A</i> | 1.0 | 2.3  | 2.6  | 3.6  | Ribosomal protein L35A, 3-prime end (by homology)                             |
| CA6093 | orf19.5964  | <i>ARF22</i>       | -1.0 | 1.0  | 1.0  | 1.1  | YDL137W | <i>ARF2</i>   | 1.0 | -1.3 | 1.2  | -1.2 | GTP-binding protein of the ARF family (by homology)                           |
| CA6094 | orf19.5963  | <i>IPF53</i>       | 1.0  | -1.1 | 1.0  | -1.0 | YDL193W |               | 1.0 | 1.1  | 1.0  | 1.1  | unknown function                                                              |
| CA6095 | orf19.5962  | <i>SNF3</i>        | 1.0  | -1.7 | -2.0 | -1.6 | YDL194W | <i>SNF3</i>   | 1.0 | -1.2 | -1.1 | -1.2 | High affinity glucose transport protein (by homology)                         |
| CA6096 | orf19.5961  | <i>IPF56</i>       | 1.0  | 1.0  | -1.1 | 1.0  | YGR232W | <i>NAS6</i>   | 1.0 | 1.1  | -1.3 | -1.2 | similar to <i>Saccharomyces cerevisiae</i> Nas6p subunit of 26S proteasome (  |
| CA6097 | orf19.5960  | <i>NCE102</i>      | 1.3  | 1.3  | 1.5  | 1.3  | YPR149W | <i>NCE102</i> | 1.0 | 1.3  | 1.0  | -1.6 | secretion of proteins that lack classical secretory signal sequence (by ho    |
| CA6098 | orf19.5959  | <i>IPF61</i>       | -1.0 | -1.2 | -1.1 | -1.0 | YDL148C | <i>NOP14</i>  | 1.0 | -1.4 | -1.4 | 1.1  | unknown function                                                              |
| CA6100 | orf19.5956  | <i>IPF66</i>       | 1.1  | 1.2  | -1.0 | -1.0 | YPR154W | <i>PIN3</i>   | 1.0 | -1.3 | -1.0 | -1.0 | unknown function                                                              |
| CA6102 | orf19.5954  | <i>SPO70.5F</i>    | -1.0 | -1.0 | 1.1  | 1.1  | YGR225W | <i>AMA1</i>   | 1.0 | -2.4 | -1.6 | -1.1 | involved in meiosis and sporulation, 5-prime end                              |
| CA6103 | orf19.5953  | <i>SFP1</i>        | -1.0 | 1.3  | 1.4  | 1.2  | YLR403W | <i>SFP1</i>   | 1.0 | 1.1  | 1.3  | 1.5  | zinc finger protein (by homology)                                             |
| CA6107 | orf19.5949  | <i>FAS2.3F</i>     | 1.6  | -1.2 | -1.2 | -2.1 | YPL231W | <i>FAS2</i>   | 1.0 | -2.3 | -1.6 | -1.3 | fatty-acyl-CoA synthase, alpha chain, 3-prime end                             |
| CA6108 | orf19.5947  | <i>SEC7</i>        | -1.3 | 1.1  | -1.3 | -1.1 | YDR170C | <i>SEC7</i>   | 1.0 | -1.3 | -1.6 | -1.3 | Guanine nucleotide exchange protein for ADP-robosylation factor (by hor       |
| CA6109 |             | <i>IPF89.3</i>     | 1.1  | -1.1 | -1.3 | -1.1 | YLR150W | <i>STM1</i>   | 1.0 | 1.9  | 2.8  | 3.2  | unknown function, 3-prime end                                                 |
| CA6110 | orf19.5943  | <i>IPF91</i>       | 1.0  | -1.1 | -1.2 | -1.1 | YHR150W |               | 1.0 | 1.1  | 1.7  | 2.4  | unknown function                                                              |
| CA6111 | orf19.5942  | <i>IPF96</i>       | -1.0 | -1.0 | -1.0 | 1.0  | YML068W |               | 1.0 | 1.0  | 1.1  | -1.1 | C3HC4 type zinc finger protein (by homology)                                  |
| CA6112 | orf19.5941  | <i>IPF97</i>       | 1.0  | 1.2  | 1.3  | 1.1  | YML067C | <i>ERV41</i>  |     |      |      |      | unknown function                                                              |
| CA6114 | orf19.5938  | <i>SEN1</i>        | -1.0 | -1.0 | -1.2 | -1.0 | YLR430W | <i>SEN1</i>   | 1.0 | -1.3 | -1.4 | -1.4 | positive effector of tRNA-splicing endonuclease (by homology)                 |
| CA6116 | orf19.5934  | <i>TOP3</i>        | -1.0 | -1.0 | -1.1 | -1.0 | YLR234W | <i>TOP3</i>   | 1.0 | -1.4 | -1.4 | -1.4 | DNA topoisomerase III (by homology)                                           |
| CA6118 | orf19.5932  | <i>IPF126</i>      | 1.1  | 1.1  | 1.3  | 1.1  | YLR241W |               | 1.0 | -1.0 | 1.0  | 1.3  | unknown function                                                              |
| CA6119 | orf19.5931  | <i>ARV1</i>        | -1.0 | 1.0  | 1.0  | -1.0 | YLR242C | <i>ARV1</i>   | 1.0 | 1.4  | 1.3  | 1.1  | involved in sterol uptake and distribution into the plasma membrane           |
| CA6122 | orf19.5928  | <i>RPP2B</i>       | 1.1  | 1.1  | 1.2  | 1.1  | YDR382W | <i>RPP2B</i>  | 1.0 | 2.5  | 3.2  | 3.1  | acidic ribosomal protein (by homology)                                        |
| CA6123 | orf19.5927  | <i>RPS15.3</i>     | 1.0  | -1.2 | -1.2 | -1.0 | YOL040C | <i>RPS15</i>  | 1.0 | 1.9  | 2.1  | 2.8  | 40S ribosomal protein S15, 3-prime end (by homology)                          |
| CA6124 | orf19.5926  | <i>ARG11</i>       | 1.1  | 1.0  | -1.0 | 1.1  | YOR130C | <i>ORT1</i>   | 1.0 | 1.1  | 1.2  | 1.6  | mitochondrial amino acid transporter (by homology)                            |
| CA6125 | orf19.5925  | <i>IPF138</i>      | -1.2 | -1.1 | -1.0 | -1.1 | YDL237W |               | 1.0 | -1.2 | 1.1  | 1.0  | unknown function                                                              |
| CA6128 | orf19.5919  | <i>IPF152</i>      | -1.2 | -1.3 | -1.5 | -1.3 | YOR129C |               | 1.0 | -1.0 | -1.0 | -1.1 | unknown function                                                              |
| CA6129 |             | <i>YRA1.EXON2</i>  | 1.1  | 1.6  | 1.7  | 1.7  | YDR381W | <i>YRA1</i>   | 1.0 | 1.7  | 2.0  | 1.8  | RNA annealing protein, exon 2 (by homology)                                   |
| CA6134 | orf19.5912  | <i>MAK21</i>       | -1.1 | -1.2 | -1.2 | -1.1 | YDR060W |               | 1.0 | -1.4 | -1.4 | -1.4 | Ribosome biogenesis protein (by homology)                                     |
| CA6137 | orf19.5910  | <i>IPF4356</i>     | -1.0 | 1.0  | -1.1 | -1.1 | YPR031W |               | 1.0 | -1.1 | -1.1 | -1.1 | unknown function                                                              |
| CA6138 | orf19.5908  | <i>IPF4351</i>     | -1.1 | -1.0 | -1.1 | -1.0 | YBR083W | <i>TEC1</i>   | 1.0 | -1.0 | -1.1 | -1.2 | unknown function                                                              |
| CA6139 | orf19.5906  | <i>ADE2</i>        | -1.1 | -1.1 | -1.3 | -1.3 | YOR128C | <i>ADE2</i>   | 1.0 | -1.1 | 1.0  | 1.0  | phosphoribosylaminoimidazole carboxylase                                      |
| CA6140 | orf19.5905  | <i>IPF1882</i>     | -1.0 | -1.1 | -1.0 | -1.1 | YBL028C |               | 1.0 | 1.2  | 1.2  | 1.2  | unknown function                                                              |
| CA6142 | orf19.5903  | <i>IPF1879</i>     | 1.1  | -1.0 | 1.3  | 1.1  | YOR301W | <i>RAX1</i>   | 1.0 | -1.5 | -1.2 | -1.0 | unknown function                                                              |
| CA6144 | orf19.5901  | <i>PKC1</i>        | -1.1 | -1.1 | -1.1 | -1.0 | YBL105C | <i>PKC1</i>   | 1.0 | -1.0 | 1.2  | 1.2  | Ser/thr protein kinase C                                                      |
| CA6145 | orf19.5897  | <i>IPF1869</i>     | -1.2 | -1.0 | -1.2 | -1.0 | YBL104C |               | 1.0 | -1.1 | 1.1  | 1.2  | unknown function                                                              |
| CA6146 | orf19.5896  | <i>IPF1863</i>     | 1.1  | -1.0 | 1.1  | 1.1  | YMR244W |               | 1.0 | -1.4 | -1.2 | -1.3 | unknown function                                                              |
| CA6148 | orf19.5894  | <i>IPF1862.3F</i>  | 1.1  | 1.0  | -1.0 | 1.0  | YEL023C |               | 1.0 | -1.1 | 1.2  | 2.0  | unknown function, 3-prime end                                                 |
| CA6149 | orf19.5893  | <i>RIP1</i>        | -1.5 | -1.5 | -1.7 | -1.5 | YEL024W | <i>RIP1</i>   | 1.0 | 1.1  | 1.2  | -1.1 | Ubiquinol cytochrome-c reductase (by homology)                                |
| CA6150 | orf19.5892  | <i>IPF1857</i>     | -1.3 | 1.4  | -1.1 | 1.1  | YJR036C | <i>HUL4</i>   | 1.0 | -1.8 | -1.9 | -2.9 | similar to <i>Saccharomyces cerevisiae</i> Hul4p hect domain E3 ubiquitin-pro |
| CA6152 | orf19.5887  | <i>NUP85</i>       | -1.1 | 1.2  | -1.0 | 1.0  | YJR042W | <i>NUP85</i>  | 1.0 | -1.9 | -2.2 | -2.2 | Nuclear pore protein (by homology)                                            |
| CA6154 | orf19.5885  | <i>IPF1848</i>     | 1.5  | 1.2  | 1.7  | 1.4  | YEL026W | <i>SNU13</i>  | 1.0 | 2.0  | 2.1  | 4.8  | similar to <i>Saccharomyces cerevisiae</i> Snu13p U4/U6.U5 snRNP associat     |
| CA6155 | orf19.5884  | <i>IPF1846</i>     | 1.1  | 1.2  | 1.4  | 1.2  | YJR041C |               | 1.0 | -1.2 | -1.2 | -1.1 | unknown function                                                              |
| CA6157 | orf19.5880  | <i>GEF1.5F</i>     | -1.1 | 1.2  | 1.1  | 1.1  | YJR040W | <i>GEF1</i>   | 1.0 | -1.6 | -1.1 | -1.3 | Voltage-gated chloride channel protein, 5-prime end (by homology)             |
| CA6159 | orf19.5877  | <i>IPF1837</i>     | -1.3 | -1.3 | -1.2 | -1.2 | YOR377W | <i>ATF1</i>   | 1.0 | -1.1 | 1.2  | 1.2  | unknown function                                                              |
| CA6161 | orf19.5875  | <i>IPF1834</i>     | 1.0  | -1.1 | -1.0 | 1.0  | YOR036W | <i>PEP12</i>  | 1.0 | 1.1  | 1.3  | -1.0 | probable syntaxin (by homology)                                               |
| CA6163 | orf19.5873  | <i>POL1</i>        | -1.2 | -1.0 | -1.3 | -1.3 | YNL102W | <i>POL1</i>   | 1.0 | -1.3 | -1.3 | -1.3 | DNA-directed DNA polymerase alpha (by homology)                               |
| CA6165 | orf19.5871  | <i>SNF5.3F</i>     | -1.1 | 1.1  | -1.0 | -1.1 | YBR289W | <i>SNF5</i>   | 1.0 | 1.1  | 1.2  | -1.0 | Component of SWI/SNF transcription activator complex, 3-prime end (by         |
| CA6166 | orf19.13291 | <i>CTP1</i>        | -1.0 | 1.0  | 1.2  | 1.1  | YBR291C | <i>CTP1</i>   | 1.0 | -1.6 | -1.5 | -1.3 | Citrate transport protein (by homology)                                       |

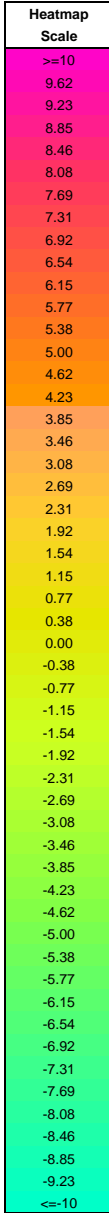



Comparison of *C. albicans* and *S. cerevisiae* Metabolism & Stress Functions

| Function                                      | <i>Candida dataset</i>  |              |         |                                               | <i>Saccharomyces dataset</i>      |             |                                               |         | Description |            |             |             |             |                                                                                     |
|-----------------------------------------------|-------------------------|--------------|---------|-----------------------------------------------|-----------------------------------|-------------|-----------------------------------------------|---------|-------------|------------|-------------|-------------|-------------|-------------------------------------------------------------------------------------|
|                                               | <i>C. albicans</i> gene |              |         |                                               | <i>S. cerevisiae</i> gene homolog |             |                                               |         |             |            |             |             |             |                                                                                     |
|                                               | Systematic              | orf19 Number | Common  | Expression Ratio<br>Glucose Concentration (%) | Systematic                        | Common      | Expression Ratio<br>Glucose Concentration (%) |         |             |            |             |             |             |                                                                                     |
|                                               |                         |              | 0       | 0.01                                          | 0.1                               | 1           | 0                                             | 0.01    | 0.1         | 1          |             |             |             |                                                                                     |
| <b>Glycolysis</b>                             |                         |              |         |                                               |                                   |             |                                               |         |             |            |             |             |             |                                                                                     |
| Hxt3                                          | CA1067                  | orf19.2023   | HXT62   | 1.3                                           | 45.4                              | 34.6        | 42.5                                          | YDR345C | HXT3        | 1.0        | 8.7         | 11.4        | 9.1         | sugar transporter                                                                   |
| Hxt6                                          | CA1070                  | orf19.2020   | HXT61   | 1.2                                           | 4.6                               | 8.0         | 3.9                                           | YDR343C | HXT6        | 1.0        | 7.1         | 10.3        | 3.3         | sugar transporter                                                                   |
| Glk1                                          | CA0263                  | orf19.1408   | GLK1    | -1.2                                          | 1.0                               | 1.0         | 1.1                                           | YCL040W | GLK1        | 1.0        | 1.6         | 1.0         | -1.8        | aldohexose specific glucokinase (by homology)                                       |
| Hxk2                                          | CA0127                  | orf19.8176   | HXK2    | -1.1                                          | 9.5                               | 9.7         | 7.9                                           | YGL253W | HXK2        | 1.0        | -1.1        | 1.4         | 1.4         | hexokinase II, 3-prime end (by homology)                                            |
| Pgi1                                          | CA3559                  | orf19.3888   | PGI1    | 1.0                                           | 1.7                               | 1.8         | 1.7                                           | YBR196C | PGI1        | 1.0        | -1.4        | 1.1         | 1.7         | Glucose-6-phosphate isomerase                                                       |
| Pfk1                                          | CA1834                  | orf19.3967   | PFK1    | -1.2                                          | 6.9                               | 6.1         | 6.6                                           | YGR240C | PFK1        | 1.0        | -1.9        | -1.1        | 1.5         | 6-phosphofructokinase, alpha subunit                                                |
| Pfk2                                          | CA3112                  | orf19.6540   | PFK2    | -1.0                                          | 9.6                               | 8.3         | 8.5                                           | YMR205C | PFK2        | 1.0        | 1.2         | 2.1         | 2.7         | 6-phosphofructokinase, beta subunit                                                 |
| Fba1                                          | CA5180                  | orf19.4618   | FBA1    | -1.2                                          | 2.1                               | 1.6         | 2.1                                           | YKL060C | FBA1        | 1.0        | 2.0         | 3.7         | 4.6         | fructose-bisphosphate aldolase (by homology)                                        |
| Tpi1                                          | CA5950                  | orf19.6745   | TPI1    | 1.1                                           | 2.2                               | 2.3         | 2.2                                           | YDR050C | TPI1        | 1.0        | 1.8         | 2.3         | 3.7         | Triose phosphate isomerase                                                          |
| Tdh3                                          | CA5892                  | orf19.6814   | GAP1    | 1.1                                           | 1.9                               | 2.1         | 2.1                                           | YGR192C | TDH3        | 1.0        | -1.1        | 1.4         | 1.9         | Glyceraldehyde-3-phosphate dehydrogenase                                            |
| Pgk1                                          | CA1691                  | orf19.3651   | PGK1    | 1.0                                           | 2.5                               | 2.4         | 2.5                                           | YCR012W | PGK1        | 1.0        | 2.0         | 2.9         | 3.5         | Phosphoglycerate kinase                                                             |
| Gpm1                                          | CA4671                  | orf19.903    | GPM1    | -1.1                                          | 2.2                               | 1.9         | 2.2                                           | YKL152C | GPM1        | 1.0        | 1.5         | 1.8         | 2.1         | phosphoglycerate mutase (by homology)                                               |
| Eno1                                          | CA3874                  | orf19.395    | ENO1    | 1.6                                           | 1.6                               | 1.2         | 1.5                                           | YGR254W | ENO1        | 1.0        | 1.8         | 2.7         | 4.2         | Enolase I (2-phosphoglycerate dehydratase)                                          |
| Pyk1                                          | CA3483                  | orf19.3575   | CDC19   | -1.1                                          | 3.2                               | 2.1         | 4.2                                           | YAL038W | CDC19       | 1.0        | 2.3         | 3.6         | 5.4         | pyruvate kinase (by homology)                                                       |
| <b>Mean</b>                                   |                         |              |         | <b>0.0</b>                                    | <b>6.7</b>                        | <b>5.9</b>  | <b>6.4</b>                                    |         |             | <b>1.0</b> | <b>1.7</b>  | <b>3.2</b>  | <b>3.1</b>  |                                                                                     |
| <b>Gluconeogenesis &amp; Glyoxylate Cycle</b> |                         |              |         |                                               |                                   |             |                                               |         |             |            |             |             |             |                                                                                     |
| Fbp1                                          | CA3199                  | orf19.6178   | FBP1    | -1.1                                          | -6.2                              | -7.9        | -7.2                                          | YLR377C | FBP1        | 1.0        | -3.2        | -3.8        | -3.3        | Fructose-1,6-bisphosphatase                                                         |
| Pck1                                          | CA5857                  | orf19.7514   | PCK1    | 1.3                                           | -11.5                             | -12.0       | -19.3                                         | YKR097W | PCK1        | 1.0        | -8.0        | -4.8        | -6.0        | phosphoenolpyruvate carboxykinase                                                   |
| Icl1                                          | CA4446                  | orf19.6844   | ICL1    | -1.0                                          | -1.9                              | -2.0        | -1.6                                          | YER065C | ICL1        | 1.0        | -4.4        | -5.3        | -4.8        | isocitrate lyase                                                                    |
| Mls1                                          | CA4748                  | orf19.4833   | MLS1    | -1.6                                          | -4.2                              | -7.3        | -4.8                                          | YNL117W | MLS1        | 1.0        | -3.7        | -3.8        | -3.3        | malate synthase                                                                     |
| <b>Mean</b>                                   |                         |              |         | <b>-0.6</b>                                   | <b>-6.0</b>                       | <b>-7.3</b> | <b>-8.2</b>                                   |         |             | <b>1.0</b> | <b>-4.8</b> | <b>-4.4</b> | <b>-4.3</b> |                                                                                     |
| <b>TCA Cycle</b>                              |                         |              |         |                                               |                                   |             |                                               |         |             |            |             |             |             |                                                                                     |
| Aco1                                          | CA3546                  | orf19.6385   | ACO1    | 1.2                                           | 1.1                               | -1.1        | -1.4                                          | YLR304C | ACO1        | 1.0        | -2.8        | -3.8        | -8.9        | aconitate hydratase (by homology)                                                   |
| Cit1                                          | CA3909                  | orf19.4393   | CIT1    | -1.0                                          | -1.0                              | -1.2        | -1.3                                          | YNR001C | CIT1        | 1.0        | -2.0        | -2.4        | -5.8        | Citrate synthase, exon 2                                                            |
| Fum1                                          | CA4255                  | orf19.543    | FUM11   | -1.2                                          | -2.0                              | -2.1        | -2.0                                          | YPL262W | FUM1        | 1.0        | -1.5        | -1.6        | -2.3        | fumarate hydratase                                                                  |
| Idh1                                          | CA4753                  | orf19.4826   | IDH1    | -1.1                                          | 1.0                               | -1.1        | 1.1                                           | YNL037C | IDH1        | 1.0        | -1.3        | -1.7        | -2.9        | isocitrate dehydrogenase (NAD+) subunit1, mitochondrial, 3-prime end (by hom)       |
| Idh2                                          | CA4148                  | orf19.13213  | IDH2    | -1.0                                          | 1.4                               | 1.4         | 1.4                                           | YOR136W | IDH2        | 1.0        | -1.6        | -1.6        | -2.3        | isocitrate dehydrogenase (NAD+) subunit 2, mitochondrial (by homology)              |
| Idp2                                          | CA0643                  | orf19.3733   | IDP2    | -1.1                                          | -3.6                              | -4.8        | -3.1                                          | YLR174W | IDP2        | 1.0        | -4.5        | -7.5        | -7.8        | isocitrate dehydrogenase, cytosolic (by homology)                                   |
| Kgd1                                          | CA3149                  | orf19.6165   | KGD1    | 1.1                                           | -2.0                              | -2.1        | -2.0                                          | YIL125W | KGD1        | 1.0        | -2.5        | -2.1        | -3.6        | 2-oxoglutarate dehydrogenase                                                        |
| Kgd2                                          | CA2997                  | orf19.6126   | KGD2    | -1.4                                          | -2.7                              | -3.2        | -2.6                                          | YDR148C | KGD2        | 1.0        | -1.9        | -1.6        | -2.7        | 2-oxoglutarate dehydrogenase complex E2 component (by homology)                     |
| Lpd1                                          | CA2998                  | orf19.6127   | LPD1    | -1.3                                          | -1.9                              | -2.6        | -2.0                                          | YFL018C | LPD1        | 1.0        | -1.9        | -2.1        | -2.1        | dihydrolipoamide dehydrogenase (by homology)                                        |
| Lsc1                                          | CA0791                  | orf19.3358   | LSC1    | 1.1                                           | -1.9                              | -1.8        | -1.7                                          | YOR142W | LSC1        | 1.0        | -1.4        | -1.4        | -1.6        | succinate-CoA ligase / synthetase (by homology)                                     |
| Lsc2                                          | CA0664                  | orf19.710    | LSC2    | 1.0                                           | -2.7                              | -2.9        | -2.7                                          | YGR244C | LSC2        | 1.0        | 1.1         | -1.3        | -2.7        | succinate-CoA ligase beta subunit, 3-prime end (by homology)                        |
| Mdh1                                          | CA5164                  | orf19.4602   | MDH1    | 1.2                                           | -1.4                              | -1.4        | -1.4                                          | YKL085W | MDH1        | 1.0        | -1.3        | -1.5        | -3.0        | Mitochondrial malate dehydrogenase precursor (by homology)                          |
| Sdh1                                          | CA4063                  | orf19.440    | SDH1    | -1.1                                          | -1.1                              | -1.1        | -1.1                                          | YKL148C | SDH1        | 1.0        | -1.3        | -1.5        | -2.1        | Succinate dehydrogenase (by homology)                                               |
| Sdh2                                          | CA1845                  | orf19.637    | IPF1123 | 1.1                                           | -1.1                              | -1.1        | -1.1                                          | YLL041C | SDH2        | 1.0        | -1.1        | -1.3        | -2.7        | similar to <i>Saccharomyces cerevisiae</i> Sdh2p succinate dehydrogenase iron-sulfu |
| Sdh4                                          | CA2423                  | orf19.11949  | SDH4    | -1.0                                          | -1.5                              | -1.3        | -1.2                                          | YDR178W | SDH4        | 1.0        | -1.5        | -1.2        | -2.2        | succinate dehydrogenase membrane anchor subunit for sdh2p (by homology)             |
| <b>Mean</b>                                   |                         |              |         | <b>-0.2</b>                                   | <b>-1.3</b>                       | <b>-1.8</b> | <b>-1.4</b>                                   |         |             | <b>1.0</b> | <b>-1.7</b> | <b>-2.2</b> | <b>-3.5</b> |                                                                                     |
| <b>Fatty Acid beta-Oxidation</b>              |                         |              |         |                                               |                                   |             |                                               |         |             |            |             |             |             |                                                                                     |
| Erg10                                         | CA0290                  | orf19.1591   | POT14   | -1.2                                          | -3.4                              | -2.9        | -3.2                                          | YPL028W | ERG10       | 1.0        | 1.5         | 2.5         | 2.0         | acetyl-CoA acetyltransferase (by homology)                                          |
| Faa2                                          | CA1596                  | orf19.272    | FAA2    | -1.2                                          | -3.0                              | -3.8        | -2.7                                          | YER015W | FAA2        | 1.0        | 1.1         | 1.1         | 1.4         | long-chain-fatty-acid-CoA ligase (by homology)                                      |
| Faa4                                          | CA5992                  | orf19.7592   | FAA4    | -1.1                                          | -2.2                              | -2.5        | -2.3                                          | YMR246W | FAA4        | 1.0        | 1.1         | 1.4         | 2.0         | long-chain fatty acid--CoA ligase and synthetase 4 (by homology)                    |
| Pot1                                          | CA5862                  | orf19.7520   | POT11   | -1.2                                          | -8.2                              | -10.0       | -8.1                                          | YIL160C | POT1        | 1.0        | 1.2         | -1.2        | -1.5        | peroxisomal 3-ketoacyl-CoA thiolase A (by homology)                                 |
| Pox1                                          | CA1572                  | orf19.9221   | POX4    | -1.0                                          | -8.4                              | -11.0       | -8.2                                          | YGL205W | POX1        | 1.0        | 1.0         | 1.1         | 1.1         | peroxisomal fatty acyl-CoA oxidase (by homology)                                    |
| <b>Mean</b>                                   |                         |              |         | <b>-1.1</b>                                   | <b>-5.0</b>                       | <b>-6.0</b> | <b>-4.9</b>                                   |         |             | <b>1.0</b> | <b>1.2</b>  | <b>1.0</b>  | <b>1.0</b>  |                                                                                     |
| <b>Osmotic Stress</b>                         |                         |              |         |                                               |                                   |             |                                               |         |             |            |             |             |             |                                                                                     |
| Ena                                           | CA4929                  | orf19.6070   | ENA22   | -1.0                                          | 1.6                               | 1.5         | 1.7                                           | YDR038C | ENA5        | 1.0        | -1.0        | 1.1         | 1.1         | P-type ATPase involved in Na+ efflux (by homology)                                  |
| Gpd2                                          | CA2263                  | orf19.1756   | GPD1    | -1.0                                          | 1.3                               | 1.8         | 1.8                                           | YOL059W | GPD2        | 1.0        | 1.7         | 3.0         | 6.5         | Glycerol-3-phosphate dehydrogenase (by homology)                                    |
| Hog1                                          | CA4677                  | orf19.895    | HOG1    | 1.1                                           | 1.0                               | -1.0        | -1.1                                          | YLR113W | HOG1        | 1.0        | 1.3         | 1.7         | 1.6         | Ser/thr protein kinase of MAPK family                                               |
| Pbs2                                          | CA5686                  | orf19.7388   | IPF3329 | -1.1                                          | -1.2                              | -1.3        | -1.3                                          | YJL128C | PBS2        | 1.0        | -1.4        | -1.1        | -1.0        | similar to <i>Saccharomyces cerevisiae</i> Pbs2p tyrosine protein kinase of the MAP |
| Rhr2                                          | CA5788                  | orf19.5437   | RHR2    | 1.0                                           | 9.7                               | 8.1         | 9.4                                           | YIL053W | RHR2        | 1.0        | 3.6         | 3.5         | 10.6        | DL-glycerol phosphatase                                                             |
| <b>Mean</b>                                   |                         |              |         | <b>-1.1</b>                                   | <b>2.5</b>                        | <b>1.8</b>  | <b>2.1</b>                                    |         |             | <b>1.0</b> | <b>0.8</b>  | <b>1.6</b>  | <b>3.7</b>  |                                                                                     |
| <b>Oxidative Stress</b>                       |                         |              |         |                                               |                                   |             |                                               |         |             |            |             |             |             |                                                                                     |
| Yap1                                          | CA0183                  | orf19.9191   | CAP1    | -1.0                                          | 1.8                               | 2.2         | 1.9                                           | YML007W | YAP1        | 1.0        | -2.1        | -2.1        | -2.6        | transcriptional activator (by homology)                                             |
| Hyr1                                          | CA0559                  | orf19.86     | GPX1    | 1.0                                           | 1.5                               | 1.6         | 1.3                                           | YIR037W | HYR1        | 1.0        | -1.1        | -1.2        | -1.5        | glutathione peroxidase (by homology)                                                |
| Cta1                                          | CA3011                  | orf19.6229   | CTA1    | 1.0                                           | -9.1                              | -7.2        | -8.5                                          | YDR256C | CTA1        | 1.0        | -1.3        | -1.1        | 1.0         | catalase A, peroxisomal (by homology)                                               |
| Grx3                                          | CA1161                  | orf19.2727   | GRX3    | 1.1                                           | 1.0                               | 1.2         | 1.1                                           | YDR098C | GRX3        | 1.0        | -1.1        | -1.1        | -1.0        | glutaredoxin-like protein                                                           |
| Grx5                                          | CA1904                  | orf19.10298  | GRX5    | 1.2                                           | -1.0                              | 1.0         | 1.2                                           | YPL059W | GRX5        | 1.0        | -1.4        | -1.7        | -2.1        | Glutaredoxin                                                                        |

|                             |        |              |               |             |             |             |             |         |               |            |             |             |             |                                                                                         |
|-----------------------------|--------|--------------|---------------|-------------|-------------|-------------|-------------|---------|---------------|------------|-------------|-------------|-------------|-----------------------------------------------------------------------------------------|
| Gsh1                        | CA0583 | orf19.12526  | <i>GSH1</i>   | -1.2        | -1.1        | -1.2        | -1.1        | YJL101C | <i>GSH1</i>   | 1.0        | -1.2        | -1.3        | -1.2        | gamma-glutamylcysteine synthetase, exon 2 (by homology)                                 |
| Gsh2                        | CA5124 | orf19.6404   | <i>GSH2</i>   | -1.2        | -1.2        | -1.3        | -1.2        | YOL049W | <i>GSH2</i>   | 1.0        | 1.1         | 1.2         | 1.4         | Glutathione synthetase (by homology)                                                    |
| Gtt1                        | CA4712 | orf19.6947   | <i>GTT1</i>   | 1.0         | -1.1        | -1.2        | -1.2        | YIR038C | <i>GTT1</i>   | 1.0        | -1.1        | -1.2        | -1.4        | glutathione S-transferase, 3-prime end (by homology)                                    |
| Sod1                        | CA4120 | orf19.2770.1 | <i>SOD1</i>   | 1.1         | 1.1         | 1.1         | 1.1         | YJR104C | <i>SOD1</i>   | 1.0        | 1.2         | 1.3         | -1.7        | Cu,Zn-superoxide dismutase, 3-prime end                                                 |
| Sod2                        | CA2719 | orf19.3340   | <i>SOD2</i>   | 1.2         | -1.2        | -1.3        | -1.2        | YHR008C | <i>SOD2</i>   | 1.0        | 1.1         | 1.1         | -1.3        | Manganese-superoxide dismutase                                                          |
| Trr1                        | CA3059 | orf19.11766  | <i>TRR1</i>   | -1.0        | 1.2         | 1.1         | 1.2         | YDR353W | <i>TRR1</i>   | 1.0        | -1.8        | 1.2         | 1.2         | Thioredoxin reductase (by homology)                                                     |
| Trx1                        | CA6010 | orf19.7611   | <i>TRX1</i>   | 1.5         | 1.5         | 1.8         | 1.7         | YLR043C | <i>TRX1</i>   | 1.0        | 1.3         | 1.1         | -1.1        | thioredoxin (by homology)                                                               |
| <b>Mean</b>                 |        |              |               | <b>0.4</b>  | <b>-0.5</b> | <b>-0.2</b> | <b>-0.3</b> |         |               | <b>1.0</b> | <b>-0.5</b> | <b>-0.3</b> | <b>-0.9</b> |                                                                                         |
| <b>Trehalose metabolism</b> |        |              |               |             |             |             |             |         |               |            |             |             |             |                                                                                         |
|                             | CA4084 | orf19.6640   | <i>TPS1</i>   | -1.0        | 1.5         | 2.1         | 1.5         | YBR126C | <i>TPS1</i>   | 1.0        | 1.6         | 1.4         | -1.1        | TREHALOSE-6-PHOSPHATE SYNTHASE                                                          |
|                             | CA5066 | orf19.3038   | <i>TPS2</i>   | 1.2         | 3.9         | 4.8         | 4.9         | YDR074W | <i>TPS2</i>   | 1.0        | 1.1         | -1.1        | -1.1        | Trehalose-6-phosphate phosphatase (by homology)                                         |
|                             | CA5505 | orf19.5348   | <i>TPS3</i>   | -1.1        | 2.2         | 1.9         | 2.2         | YMR261C | <i>TPS3</i>   | 1.0        | -1.1        | -1.3        | -1.6        | alpha,alpha-trehalose-phosphate synthase, regulatory subunit, 3-prime end (by homology) |
|                             | CA5824 | orf19.7479   | <i>NTH1</i>   | -1.1        | -1.0        | 1.4         | 1.1         | YDR001C | <i>NTH1</i>   | 1.0        | 1.2         | 1.5         | 1.2         | Neutral trehalase                                                                       |
| <b>Mean</b>                 |        |              |               | <b>-0.5</b> | <b>1.6</b>  | <b>2.6</b>  | <b>2.4</b>  |         |               | <b>1.0</b> | <b>0.7</b>  | <b>0.1</b>  | <b>-0.6</b> |                                                                                         |
| <b>Ribosome</b>             |        |              |               |             |             |             |             |         |               |            |             |             |             |                                                                                         |
|                             | CA2047 | orf19.10452  | <i>RPL10</i>  | 1.0         | -1.3        | -1.4        | -1.1        | YLR075W | <i>RPL10</i>  | 1.0        | 2.0         | 2.6         | 3.2         | Ribosomal protein L10 (by homology)                                                     |
|                             | CA0763 | orf19.2232   | <i>RPL11</i>  | 1.4         | 1.0         | -1.1        | 1.1         | YPR102C | <i>RPL11A</i> | 1.0        | 1.4         | 1.7         | 1.8         | 60S ribosomal protein (by homology)                                                     |
|                             | CA4001 | orf19.1635   | <i>RPL12</i>  | -1.0        | -1.0        | -1.0        | -1.1        | YEL054C | <i>RPL12A</i> | 1.0        | -2.3        | 1.8         | 2.6         | ribosomal protein                                                                       |
|                             | CA2818 | orf19.2994   | <i>RPL13</i>  | 1.3         | -1.1        | -1.2        | 1.0         | YDL082W | <i>RPL13A</i> | 1.0        | 1.4         | 1.6         | 1.8         | Ribosomal protein                                                                       |
|                             | CA3602 | orf19.4931.1 | <i>RPL14B</i> | 1.0         | -1.0        | -1.1        | 1.0         | YKL006W | <i>RPL14A</i> | 1.0        | 1.8         | 1.7         | 2.5         | ribosomal protein L14B, 3-prime end (by homology)                                       |
|                             | CA4512 | orf19.8123   | <i>RPL15B</i> | 1.1         | -1.0        | -1.1        | 1.1         | YLR029C | <i>RPL15A</i> | 1.0        | 1.1         | 1.2         | 1.9         | ribosomal protein L15.e.c13 (by homology)                                               |
|                             | CA3864 | orf19.6085   | <i>RPL16A</i> | -1.0        | -1.2        | -1.4        | -1.2        | YNL069C | <i>RPL16B</i> | 1.0        | 1.6         | 2.9         | 3.9         | ribosomal protein (by homology)                                                         |
|                             | CA1440 | orf19.4490   | <i>RPL17B</i> | 1.0         | -1.3        | -1.1        | 1.0         | YJL177W | <i>RPL17B</i> | 1.0        | -1.0        | 1.5         | 1.6         | RPL17B ribosomal protein L17.e                                                          |
|                             | CA6079 | orf19.5982   | <i>RPL18</i>  | -1.0        | 1.1         | 1.1         | 1.1         | YOL120C | <i>RPL18A</i> | 1.0        | -1.5        | -1.5        | -1.2        | Ribosomal Protein RPL18B (large subunit), exon 2 (by homology)                          |
|                             | CA2031 | orf19.3465   | <i>RPL10A</i> | 1.2         | -1.0        | 1.1         | 1.2         | YPL220W | <i>RPL1A</i>  | 1.0        | 2.8         | 4.2         | 4.3         | L10A ribosomal protein                                                                  |
|                             | CA0736 | orf19.4632   | <i>RPL20B</i> | 1.3         | -1.1        | 1.2         | 1.3         | YOR312C | <i>RPL20B</i> | 1.0        | 1.8         | 2.1         | 2.2         | ribosomal protein (by homology)                                                         |
|                             | CA2092 | orf19.840    | <i>RPL21A</i> | 1.1         | -1.1        | -1.1        | 1.1         | YBR191W | <i>RPL21A</i> | 1.0        | 1.1         | 1.2         | 2.3         | Ribosomal protein, 3-prime end (by homology)                                            |
|                             | CA2454 | orf19.3504   | <i>RPL23B</i> | 1.4         | -1.0        | 1.1         | 1.4         | YER117W | <i>RPL23B</i> | 1.0        | 1.9         | 2.0         | 2.5         | ribosomal protein L23.e, 3-prime end (by homology)                                      |
|                             | CA1189 | orf19.11269  | <i>RPL24A</i> | 1.1         | -1.3        | -1.4        | -1.1        | YGL031C | <i>RPL24A</i> | 1.0        | 1.4         | 1.6         | 1.7         | ribosomal protein L24 (by homology)                                                     |
|                             | CA1977 | orf19.687.1  | <i>RPL25</i>  | 1.6         | 1.2         | 1.2         | 1.3         | YOL127W | <i>RPL25</i>  | 1.0        | 1.4         | 1.5         | 1.9         | ribosomal protein L23a, 3-prime end (by homology)                                       |
|                             | CA2108 | orf19.3690.2 | <i>RPL26A</i> | 1.1         | -1.1        | 1.2         | 1.2         | YLR344W | <i>RPL26A</i> | 1.0        | 1.8         | 2.1         | 2.3         | ribosomal protein, 3-prime end (by homology)                                            |
|                             | CA1972 | orf19.5225.2 | <i>RPL27A</i> | 1.6         | 1.2         | 1.2         | 1.2         | YHR010W | <i>RPL27A</i> | 1.0        | 1.6         | 1.9         | 2.1         | ribosomal protein L27                                                                   |
|                             | CA1662 | orf19.2864.1 | <i>RPL28</i>  | 1.3         | -1.0        | 1.1         | 1.2         | YGL103W | <i>RPL28</i>  | 1.0        | 1.8         | 1.8         | 2.2         | Ribosomal protein, 3-prime end (by homology)                                            |
|                             | CA3307 | orf19.2309.2 | <i>RPL2</i>   | 1.0         | 1.0         | -1.2        | -1.1        | YIL018W | <i>RPL2B</i>  | 1.0        | -1.6        | -1.5        | -1.4        | ribosomal protein L8, 3-prime end (by homology)                                         |
|                             | CA0615 | orf19.1601   | <i>RPL3</i>   | -1.2        | -1.3        | -1.5        | -1.4        | YOR063W | <i>RPL3</i>   | 1.0        | 1.8         | 2.9         | 3.0         | 60S large subunit ribosomal protein L3.e (by homology)                                  |
|                             | CA1188 | orf19.3788.1 | <i>RPL30</i>  | 1.9         | 1.3         | 1.4         | 1.4         | YGL030W | <i>RPL30</i>  | 1.0        | 1.4         | 2.4         | 2.5         | RNA binding, 3-prime end (by homology)                                                  |
|                             | CA1298 | orf19.3415.1 | <i>RPL32</i>  | 1.5         | 1.2         | 1.2         | 1.3         | YBL092W | <i>RPL32</i>  | 1.0        | -1.2        | -1.5        | 1.1         | ribosomal protein L32                                                                   |
|                             | CA4571 | orf19.6882.1 | <i>RPL33</i>  | 1.5         | 1.2         | 1.3         | 1.7         | YPL143W | <i>RPL33A</i> | 1.0        | 1.0         | 1.7         | 2.1         | ribosomal protein L35a, 3-prime end                                                     |
|                             | CA2579 | orf19.6220.4 | <i>RPL34B</i> | 1.8         | 1.3         | 1.2         | 1.4         | YIL052C | <i>RPL34B</i> | 1.0        | 2.0         | 2.2         | 2.6         | Ribosomal protein L34.e, 3-prime end (by homology)                                      |
|                             | CA6092 | orf19.5964.2 | <i>RPL35</i>  | 1.6         | 1.2         | 1.7         | 1.5         | YDL191W | <i>RPL35A</i> | 1.0        | 2.3         | 2.6         | 3.6         | Ribosomal protein L35A, 3-prime end (by homology)                                       |
|                             | CA4102 | orf19.667.1  | <i>RPL37B</i> | 1.1         | 1.1         | 1.1         | 1.1         | YDR500C | <i>RPL37B</i> | 1.0        | 1.2         | 1.3         | 1.5         | Ribosomal protein                                                                       |
|                             | CA2734 | orf19.2111.2 | <i>RPL38</i>  | 1.5         | 1.4         | 1.4         | 1.3         | YLR325C | <i>RPL38</i>  | 1.0        | 1.1         | 1.3         | 1.6         | ribosomal protein L38 (by homology)                                                     |
|                             | CA2023 | orf19.4909.1 | <i>RPL42</i>  | 1.9         | 1.1         | 1.1         | 1.4         | YNL162W | <i>RPL42A</i> | 1.0        | 2.5         | 2.6         | 3.2         | ribosomal protein L36a, 3-prime end (by homology)                                       |
|                             | CA1637 | orf19.3942.1 | <i>RPL43A</i> | 1.5         | 1.1         | 1.4         | 1.3         | YPR043W | <i>RPL43A</i> | 1.0        | 2.2         | 2.4         | 1.8         | ribosomal protein, 3-prime end (by homology)                                            |
|                             | CA5343 | orf19.7217   | <i>RPL4B</i>  | -1.1        | 1.1         | 1.0         | -1.0        | YDR012W | <i>RPL4B</i>  | 1.0        | 1.8         | 2.7         | 3.0         | Ribosomal protein L4B (by homology)                                                     |
|                             | CA3111 | orf19.6541   | <i>RPL5</i>   | -1.1        | -1.1        | -1.1        | -1.1        | YPL131W | <i>RPL5</i>   | 1.0        | 1.5         | 3.2         | 4.2         | ribosomal protein (by homology)                                                         |
|                             | CA3123 | orf19.3003.1 | <i>RPL6</i>   | 1.4         | 1.1         | 1.0         | 1.1         | YLR448W | <i>RPL6B</i>  | 1.0        | 1.6         | 2.4         | 2.3         | ribosomal protein, 3-prime end                                                          |
|                             | CA3800 | orf19.2478.1 | <i>RPL7A</i>  | 1.0         | -1.1        | -1.2        | -1.1        | YPL198W | <i>RPL7B</i>  | 1.0        | 1.4         | 2.5         | 2.9         | 60S Ribosomal Protein L7-A, 3-prime end                                                 |
|                             | CA6064 | orf19.6002   | <i>RPL81</i>  | 1.2         | 1.0         | -1.0        | 1.0         | YLL045C | <i>RPL8B</i>  | 1.0        | 1.7         | 2.4         | 3.1         | 60S ribosomal protein L7a.e.B (by homology)                                             |
|                             | CA0239 | orf19.236    | <i>RPL9B</i>  | 1.4         | -1.3        | 1.1         | 1.0         | YNL067W | <i>RPL9B</i>  | 1.0        | 1.5         | 2.4         | 2.4         | RPL9B ribosomal protein L9 by homology                                                  |
|                             | CA5021 | orf19.6975   | <i>YST1</i>   | -1.1        | -1.3        | -1.3        | -1.3        | YGR214W | <i>RPS0A</i>  | 1.0        | 1.5         | 1.6         | 2.5         | Ribosomal protein, exon 2                                                               |
|                             | CA3739 | orf19.2179.2 | <i>RPS10</i>  | 1.4         | -1.1        | -1.1        | 1.0         | YOR293W | <i>RPS10A</i> | 1.0        | 1.6         | 2.2         | 2.6         | ribosomal protein, 3-prime end (by homology)                                            |
|                             | CA5920 | orf19.6785   | <i>RPS12</i>  | 1.4         | 1.1         | 1.3         | 1.4         | YOR369C | <i>RPS12</i>  | 1.0        | 2.5         | 3.6         | 3.4         | acidic ribosomal protein S12 (by homology)                                              |
|                             | CA1304 | orf19.4193.1 | <i>RPS13</i>  | 1.5         | 1.3         | 1.3         | 1.4         | YDR064W | <i>RPS13</i>  | 1.0        | 1.3         | 1.1         | 1.9         | ribosomal protein, 3-prime end (by homology)                                            |
|                             | CA3690 | orf19.6265.1 | <i>RPS14B</i> | 1.1         | 1.0         | -1.1        | 1.1         | YJL191W | <i>RPS14B</i> | 1.0        | 1.2         | 1.4         | 1.7         | ribosomal protein (by homology)                                                         |
|                             | CA6123 | orf19.5927   | <i>RPS15</i>  | 1.0         | -1.2        | -1.2        | -1.0        | YOL040C | <i>RPS15</i>  | 1.0        | 1.9         | 2.1         | 2.8         | 40S ribosomal protein S15, 3-prime end (by homology)                                    |
|                             | CA2817 | orf19.2994.1 | <i>RPS16</i>  | 1.2         | 1.1         | 1.1         | 1.1         | YMR143W | <i>RPS16A</i> |            |             |             |             | ribosomal protein, 3-prime end                                                          |
|                             | CA3341 | orf19.2329.1 | <i>RPS17</i>  | 1.3         | -1.0        | 1.2         | 1.2         | YDR447C | <i>RPS17B</i> | 1.0        | -1.3        | 3.1         | 3.3         | Ribosomal protein S17, 3-prime end (by homology)                                        |
|                             | CA5203 | orf19.7018   | <i>RPS18</i>  | 1.8         | 1.1         | 1.1         | 1.3         | YML026C | <i>RPS18B</i> |            |             |             |             | Ribosomal protein S18 (by homology)                                                     |
|                             | CA6068 | orf19.5996.1 | <i>RPS19A</i> | 1.4         | 1.1         | -1.0        | 1.1         | YOL121C | <i>RPS19A</i> | 1.0        | 1.9         | 1.9         | 2.7         | ribosomal protein S19.e, 3-prime end (by homology)                                      |
|                             | CA2811 | orf19.10520  | <i>RPS10</i>  | -1.2        | -1.3        | -1.4        | -1.2        | YML063W | <i>RPS1B</i>  | 1.0        | 1.7         | 1.8         | 3.0         | Ribosomal protein 10                                                                    |
|                             | CA1715 | orf19.3334   | <i>RPS21</i>  | 1.0         | 1.0         | -1.1        | 1.0         | YGL123W | <i>RPS2</i>   | 1.0        | 1.2         | 1.4         | 2.2         | ribosomal protein (by homology)                                                         |
|                             | CA3539 | orf19.6375   | <i>RPS22</i>  | -1.2        | -1.3        | -1.2        | -1.2        | YHL015W | <i>RPS20</i>  | 1.0        | 1.1         | 2.1         | 1.6         | ribosomal protein by homology                                                           |
|                             | CA2937 | orf19.3325.3 | <i>RPS21B</i> | 1.9         | 1.3         | 1.4         | 1.4         | YJL136C | <i>RPS21B</i> | 1.0        | 2.4         | 2.4         | 2.5         | ribosomal protein S21, 3-prime end                                                      |
|                             | CA3689 | orf19.6265   | <i>RPS22A</i> | 1.9         | 1.2         | 1.2         | 1.4         | YJL190C | <i>RPS22A</i> | 1.0        | 1.1         | 1.2         | 1.4         | ribosomal protein S15a.e.c10 (by homology)                                              |
|                             | CA0567 | orf19.13632  | <i>RPS23</i>  | 1.0         | -1.1        | -1.0        | 1.1         | YPR132W | <i>RPS23B</i> | 1.0        | 2.1         | 2.8         | 3.5         | Ribosomal protein S23 (by homology)                                                     |

|             |              |                |            |            |            |            |         |               |            |            |            |            |                                                                 |
|-------------|--------------|----------------|------------|------------|------------|------------|---------|---------------|------------|------------|------------|------------|-----------------------------------------------------------------|
| CA3793      | orf19.5825.1 | <i>IPF5701</i> | 1.1        | 1.0        | 1.1        | 1.1        | YER074W | <i>RPS24A</i> | 1.0        | 2.2        | 2.2        | 2.5        | unknown function                                                |
| CA5807      | orf19.5466   | <i>RPS24</i>   | 1.3        | 1.2        | -1.1       | 1.1        | YIL069C | <i>RPS24B</i> | 1.0        | 1.9        | 1.9        | 2.7        | ribosomal protein S24.e                                         |
| CA4269      | orf19.6663   | <i>RPS25B</i>  | 1.2        | 1.0        | 1.0        | 1.1        | YLR333C | <i>RPS25B</i> | 1.0        | 1.2        | 1.4        | 1.9        | Cytosolic ribosomal protein (by homology)                       |
| CA4534      | orf19.1470   | <i>RPS26A</i>  | 1.7        | 1.3        | 1.3        | 1.5        | YGL189C | <i>RPS26A</i> | 1.0        | 1.3        | 1.8        | 1.8        | ribosomal protein S26.e.A, cytosolic (by homology)              |
| CA3226      | orf19.6286.2 | <i>RPS27</i>   | 1.4        | -1.0       | 1.3        | 1.3        | YKL156W | <i>RPS27A</i> | 1.0        | 1.4        | 1.4        | 1.7        | ribosomal protein S27 (by homology)                             |
| CA5646      | orf19.7048.1 | <i>RPS28B</i>  | 1.6        | 1.5        | 1.6        | 1.6        | YLR264W | <i>RPS28B</i> | 1.0        | 2.0        | 1.7        | 2.5        | Ribosomal protein S28B (S33B) (YS27), 3-prime end (by homology) |
| CA3278      | orf19.6312   | <i>RPS3</i>    | 1.1        | -1.2       | -1.3       | -1.0       | YNL178W | <i>RPS3</i>   | 1.0        | 1.8        | 2.7        | 3.1        | Ribosomal protein S3.e (by homology)                            |
| CA2587      | orf19.4375.1 | <i>RPS30</i>   | 1.2        | 1.1        | 1.1        | 1.1        | YOR182C | <i>RPS30B</i> | 1.0        | 1.4        | 1.8        | 1.8        | 40S ribosomal protein S30, 3-prime end (by homology)            |
| CA2011      | orf19.3087   | <i>RPS31</i>   | 1.2        | 1.1        | -1.0       | 1.1        | YLR167W | <i>RPS31</i>  | 1.0        | 2.1        | 2.4        | 2.3        | Ubiquitin fusion protein                                        |
| CA5499      | orf19.5341   | <i>RPS4A</i>   | 1.0        | -1.2       | -1.3       | -1.1       | YJR145C | <i>RPS4A</i>  | 1.0        | 1.3        | 1.3        | 2.2        | ribosomal protein S4                                            |
| CA0632      | orf19.11812  | <i>RPS5</i>    | 1.2        | -1.2       | -1.2       | -1.1       | YJR123W | <i>RPS5</i>   | 1.0        | -1.6       | -1.4       | -1.1       | ribosomal protein S5.e (by homology)                            |
| CA2708      | orf19.4660   | <i>RPS6A</i>   | -1.2       | -1.5       | -1.7       | -1.3       | YPL090C | <i>RPS6A</i>  | 1.0        | 1.9        | 2.3        | 3.4        | ribosomal protein S6 (by homology)                              |
| CA1502      | orf19.9267   | <i>RPS7A</i>   | -1.1       | -1.1       | -1.0       | 1.1        | YOR096W | <i>RPS7A</i>  | 1.0        | 1.8        | 2.5        | 3.2        | ribosomal protein (by homology)                                 |
| CA4562      | orf19.6873   | <i>RPS8A</i>   | 1.1        | -1.0       | -1.1       | -1.0       | YER102W | <i>RPS8B</i>  | 1.0        | 2.4        | 3.4        | 5.0        | ribosomal protein (by homology)                                 |
| CA0322      | orf19.8459   | <i>RPS9B</i>   | 1.4        | 1.1        | 1.1        | 1.2        | YPL081W | <i>RPS9A</i>  | 1.0        | 1.5        | 1.9        | 2.1        | Ribosomal protein                                               |
| <b>Mean</b> |              |                | <b>0.9</b> | <b>0.0</b> | <b>0.1</b> | <b>0.6</b> |         |               | <b>1.0</b> | <b>1.3</b> | <b>1.9</b> | <b>2.3</b> |                                                                 |

Comparison of *C. albicans* and *S. cerevisiae* Mitochondrial Functions

| <b>Candida dataset</b>             |                     |               |  | <b>Expression Ratio</b>          |             |            |          | <b>Saccharomyces dataset</b>  |               |            |            | <b>Expression Ratio</b>         |            |                                                                                                |  | <b>Description</b> |
|------------------------------------|---------------------|---------------|--|----------------------------------|-------------|------------|----------|-------------------------------|---------------|------------|------------|---------------------------------|------------|------------------------------------------------------------------------------------------------|--|--------------------|
| <b>C. albicans gene</b>            |                     |               |  | <b>Glucose Concentration (%)</b> |             |            |          | <b>S.cerevisiae homologue</b> |               |            |            | <b>Glucose Concentration(%)</b> |            |                                                                                                |  |                    |
| <b>Systematic</b>                  | <b>orf19 Number</b> | <b>Common</b> |  | <b>0.0</b>                       | <b>0.01</b> | <b>0.1</b> | <b>1</b> | <b>Systematic</b>             | <b>Common</b> | <b>0.0</b> | <b>0.0</b> | <b>0.1</b>                      | <b>1.0</b> |                                                                                                |  |                    |
| <b>Mitochondrial protein genes</b> |                     |               |  |                                  |             |            |          |                               |               |            |            |                                 |            |                                                                                                |  |                    |
| CA0783                             | orf19.3931          | ACR1          |  | 1.1                              | -3.3        | -3.5       | -2.3     | YJR095W                       | SFC1          | 1.0        | -4.3       | -4.6                            | -4.9       | Succinate-fumarate transporter (by homology)                                                   |  |                    |
| CA3474                             | orf19.1669          | AFG3          |  | -1.3                             | -1.5        | -1.8       | -1.5     | YER017C                       | AFG3          | 1.0        | 1.1        | 1.2                             | 1.2        | Member of the Sec18p, Pas1p, Cdc48p, TBP-1 family of ATPases (by homology)                     |  |                    |
| CA2406                             | orf19.300           | AIP2          |  | -1.2                             | -1.2        | -1.3       | -1.3     | YDL178W                       | AIP2          | 1.0        | 1.2        | 1.4                             | 1.1        | actin interacting protein 2 (by homology)                                                      |  |                    |
| CA4159                             | orf19.13228         | ALD5          |  | 1.5                              | -3.3        | -2.7       | -3.7     | YER073W                       | ALD5          | 1.0        | 1.2        | 1.2                             | 2.4        | aldehyde dehydrogenase (NAD+) (by homology)                                                    |  |                    |
| CA6124                             | orf19.5926          | ARG11         |  | 1.1                              | 1.0         | -1.0       | 1.1      | YOR130C                       | ORT1          | 1.0        | 1.1        | 1.2                             | 1.6        | mitochondrial amino acid transporter (by homology)                                             |  |                    |
| CA2595                             | orf19.56            | ARG2          |  | -1.0                             | -1.0        | -1.0       | -1.0     | YJL071W                       | ARG2          | 1.0        | -1.2       | -1.3                            | -1.2       | acetylglutamate synthase (by homology)                                                         |  |                    |
| CA4597                             | orf19.6916          | ATP11         |  | 1.0                              | -1.0        | -1.0       | 1.0      | YNL315C                       | ATP11         | 1.0        | -1.1       | -1.2                            | -1.4       | F1F0-ATPase complex assembly protein (by homology)                                             |  |                    |
| CA2113                             | orf19.3686          | ATP12         |  | -1.1                             | -1.1        | -1.0       | -1.0     | YJL180C                       | ATP12         | 1.0        | -2.0       | -2.5                            | -2.3       | F1F0-ATPase complex assembly protein (by homology)                                             |  |                    |
| CA3353                             | orf19.9500          | AUR1          |  | 1.3                              | 1.2         | 1.6        | 1.2      | YKL004W                       | AUR1          | 1.0        | 1.1        | 1.0                             | 1.2        | aureobasidin-resistance protein                                                                |  |                    |
| CA1380                             | orf19.458           | BCS1          |  | -1.0                             | -1.1        | -1.1       | -1.0     | YDR375C                       | BCS1          | 1.0        | -1.6       | -1.8                            | -1.7       | mitochondrial protein of the CDC48/PAS1/SEC18 (AAA) family of ATPases (by homology)            |  |                    |
| CA5152                             | orf19.4591          | CAT2          |  | 1.0                              | -7.2        | -10.2      | -10.3    | YML042W                       | CAT2          | 1.0        | -1.3       | -1.8                            | -2.1       | carnitine O-acetyltransferase (by homology)                                                    |  |                    |
| CA2518                             | orf19.5515          | CBP3          |  | -1.0                             | 1.0         | -1.0       | -1.0     | YPL215W                       | CBP3          | 1.0        | 1.1        | 1.1                             | -1.0       | involved in cytochrome-c reductase assembly (by homology)                                      |  |                    |
| CA3877                             | orf19.392           | CBP4          |  | -1.0                             | -1.1        | -1.1       | -1.0     | YGR174C                       | CBP4          | 1.0        | -1.0       | -1.3                            | -1.7       | Ubiquinol-cytochrome-c reductase assembly factor (by homology)                                 |  |                    |
| CA1889                             |                     | CBP6          |  | 1.1                              | 1.1         | 1.1        | 1.1      | YBR120C                       | CBP6          | 1.0        | -1.2       | -1.4                            | -1.4       | Apo-cytochrome B pre-mRNA processing protein (by homology)                                     |  |                    |
| CA4698                             | orf19.6926          | CDC25         |  | 1.1                              | 1.0         | 1.2        | 1.1      | YLR310C                       | CDC25         | 1.0        | -1.1       | 1.1                             | 1.1        | cell division cycle protein                                                                    |  |                    |
| CA6082                             | orf19.5977          | CEM1          |  | -1.1                             | -1.1        | -1.2       | -1.0     | YER061C                       | CEM1          | 1.0        | -1.6       | 1.0                             | 1.4        | 3-oxoacyl-[acyl-carrier-protein]-synthase (by homology)                                        |  |                    |
| CA3909                             | orf19.4393          | CIT1.EXON2    |  | -1.0                             | -1.0        | -1.2       | -1.3     | YNR001C                       | CIT1          | 1.0        | -2.0       | -2.4                            | -5.8       | Citrate synthase, exon 2                                                                       |  |                    |
| CA3958                             | orf19.1416          | COX11         |  | 1.1                              | 1.1         | 1.3        | 1.0      | YPL132W                       | COX11         | 1.0        | -1.1       | -1.0                            | -1.2       | cytochrome-c oxidase assembly protein by homology to <i>S. cerevisiae</i>                      |  |                    |
| CA4536                             | orf19.1467          | COX13         |  | 1.2                              | -1.0        | 1.1        | 1.2      | YGL191W                       | COX13         | 1.0        | -1.2       | -1.5                            | -2.4       | cytochrome-c oxidase chain VIa (by homology)                                                   |  |                    |
| CA1688                             | orf19.3656          | COX15         |  | -1.1                             | 2.0         | 2.6        | 2.5      | YER141W                       | COX15         | 1.0        | -1.4       | -1.4                            | -1.6       | cytochrome oxidase assembly factor (by homology)                                               |  |                    |
| CA1090                             | orf19.3946          | COX18         |  | -1.0                             | 1.0         | 1.3        | 1.1      | YGR062C                       | COX18         | 1.0        | -1.1       | -1.2                            | -1.1       | protein required for activity of mitochondrial cytochrome oxidase (by homology)                |  |                    |
| CA4533                             | orf19.1471          | COX4          |  | 1.2                              | 1.1         | 1.3        | 1.1      | YGL187C                       | COX4          | 1.0        | 1.1        | -1.0                            | -1.9       | cytochrome-c oxidase (by homology)                                                             |  |                    |
| CA2630                             | orf19.12223         | COX5A         |  | 1.3                              | -1.1        | 1.4        | 1.1      | YNL052W                       | COX5A         | 1.0        | 1.3        | 1.4                             | -1.4       | cytochrome-c oxidase chain V.A precursor (by homology)                                         |  |                    |
| CA0031                             | orf19.227           | COX7          |  | 1.0                              | -1.0        | 1.0        | 1.1      | YMR256C                       | COX7          |            |            |                                 |            | Subunit VII of cytochrome c oxidase (by homology)                                              |  |                    |
| CA2134                             | orf19.5213          | COX8          |  | 1.5                              | 1.3         | 1.4        | 1.5      | YLR395C                       | COX8          | 1.0        | -1.1       | -1.2                            | -1.5       | CYTOCHROME C OXIDASE (by homology)                                                             |  |                    |
| CA5828                             | orf19.7483          | CRM1          |  | -1.7                             | -1.3        | -1.6       | -1.3     | YGR218W                       | CRM1          | 1.0        | 1.0        | 1.2                             | 1.2        | Nuclear export factor                                                                          |  |                    |
| CA6166                             | orf19.13291         | CTP1          |  | -1.0                             | 1.0         | 1.2        | 1.1      | YBR291C                       | CTP1          | 1.0        | -1.6       | -1.5                            | -1.3       | Citrate transport protein (by homology)                                                        |  |                    |
| CA0038                             | orf19.1770          | CYC1          |  | 1.2                              | 1.2         | 1.3        | 1.4      | YJR048W                       | CYC1          | 1.0        | -1.5       | -1.5                            | -2.3       | cytochrome-c isoform 1                                                                         |  |                    |
| CA5141                             | orf19.4578          | CYT2          |  | 1.0                              | 1.1         | 1.0        | 1.0      | YKL087C                       | CYT2          | 1.0        | -1.8       | -1.6                            | -1.6       | holocytochrome-c1 synthase (by homology)                                                       |  |                    |
| CA2763                             | orf19.5628          | DIC1.3        |  | 1.0                              | -1.1        | -1.1       | 1.0      | YLR348C                       | DIC1          | 1.0        | -1.0       | -1.0                            | -1.2       | dicarboxylate carrier protein, 3-prime end (by homology)                                       |  |                    |
| CA5942                             | orf19.6755          | DLD2          |  | 1.0                              | 1.2         | 1.3        | 1.1      | YDL174C                       | DLD1          | 1.0        | -2.0       | -2.6                            | -2.0       | D-lactate ferricytochrome C oxidoreductase (by homology)                                       |  |                    |
| CA5033                             | orf19.6987          | DNM1          |  | -1.3                             | -1.2        | -1.4       | -1.1     | YLL001W                       | DNM1          | 1.0        | -1.5       | -1.3                            | -1.1       | Dynamin-related protein (by homology)                                                          |  |                    |
| CA1732                             | orf19.6500          | ECM42         |  | 1.0                              | 1.0         | 1.1        | 1.0      | YMR062C                       | ECM40         |            |            |                                 |            | Acetylornithine acetyltransferase (by homology)                                                |  |                    |
| CA0253                             | orf19.477           | FIL1          |  | 1.0                              | 1.0         | -1.0       | -1.0     | YHR038W                       | FIL1          | 1.0        | -2.1       | -1.5                            | -1.6       | Putative mitochondrial ribosome recycling factor (by homology)                                 |  |                    |
| CA4945                             | orf19.6532          | FLX1          |  | 1.1                              | 1.1         | 1.1        | 1.0      | YIL134W                       | FLX1          | 1.0        | -1.4       | -1.3                            | -1.3       | MITOCHONDRIAL FAD CARRIER by homology                                                          |  |                    |
| CA2352                             | orf19.4418          | FMT1          |  | -1.0                             | 1.0         | 1.1        | 1.0      | YBL013W                       | FMT1          | 1.0        | 1.1        | 1.0                             | 1.1        | Methionyl-tRNA Transformylase (by homology)                                                    |  |                    |
| CA2948                             | orf19.1963          | GDS1          |  | -1.1                             | -1.1        | -1.1       | -1.0     | YOR355W                       | GDS1          | 1.0        | 1.0        | 1.7                             | 1.3        | nam9-1 suppressor (by homology)                                                                |  |                    |
| CA5206                             | orf19.7021          | GPH1          |  | 1.0                              | -1.0        | 1.3        | 1.4      | YPR160W                       | GPH1          | 1.0        | 1.0        | -1.3                            | -1.3       | Glycogen phosphorylase (by homology)                                                           |  |                    |
| CA3566                             | orf19.3133          | GUT2          |  | 1.1                              | -1.6        | -1.6       | -1.8     | YIL155C                       | GUT2          | 1.0        | -1.8       | -2.8                            | -5.1       | Glycerol-3-phosphate dehydrogenase, mitochondrial (by homology)                                |  |                    |
| CA0749                             | orf19.1973          | HAP5          |  | -1.0                             | -1.0        | -1.0       | -1.0     | YOR358W                       | HAP5          | 1.0        | -1.3       | -1.4                            | -1.4       | CCAAT-binding factor subunit (by homology)                                                     |  |                    |
| CA1271                             | orf19.2723          | HIT1          |  | -1.1                             | -1.1        | -1.0       | -1.2     | YJR055W                       | HIT1          | 1.0        | -1.1       | -1.1                            | -1.1       | required for growth at high temperature (by homology)                                          |  |                    |
| CA5341                             |                     | HSP10.3       |  | 1.1                              | 1.0         | 1.0        | 1.1      | YOR020C                       | HSP10         | 1.0        | -1.1       | -1.2                            | -1.2       | 10 kDa mitochondrial heat shock chaperonin, 3-prime end (by homology)                          |  |                    |
| CA1239                             | orf19.717           | HSP60         |  | -1.2                             | -1.3        | -1.3       | -1.3     | YLR259C                       | HSP60         | 1.0        | -1.4       | -1.4                            | -1.9       | Heat Shock Protein 60 (HSP60)                                                                  |  |                    |
| CA4753                             | orf19.4826          | IDH1.3        |  | -1.1                             | 1.0         | -1.1       | 1.1      | YNL037C                       | IDH1          | 1.0        | -1.3       | -1.7                            | -2.9       | isocitrate dehydrogenase (NAD+) subunit 1, mitochondrial, 3-prime end (by homology)            |  |                    |
| CA4148                             | orf19.13213         | IDH2          |  | -1.0                             | 1.4         | 1.4        | 1.4      | YOR136W                       | IDH2          | 1.0        | -1.6       | -1.6                            | -2.3       | Isocitrate dehydrogenase (NAD+) subunit 2, mitochondrial (by homology)                         |  |                    |
| CA4428                             | orf19.5167          | IFM1          |  | -1.2                             | -1.3        | -1.6       | -1.4     | YOL023W                       | IFM1          | 1.0        | -1.1       | -1.2                            | -1.3       | translation initiation factor 2 by homology                                                    |  |                    |
| CA2945                             | orf19.1967          | IMG1          |  | 1.1                              | 1.1         | 1.0        | -1.0     | YCR046C                       | IMG1          | 1.0        | -1.5       | -1.5                            | -1.3       | Ribosomal protein, mitochondrial (by homology)                                                 |  |                    |
| CA5084                             | orf19.3061          | IMP1          |  | 1.1                              | 1.3         | 1.3        | 1.2      | YMR150C                       | IMP1          | 1.0        | -1.1       | -1.1                            | -1.1       | protease, mitochondrial (by homology)                                                          |  |                    |
| CA1135                             | orf19.1981          | IMP2          |  | -1.0                             | 1.0         | -1.0       | -1.0     | YMR035W                       | IMP2          | 1.0        | -1.1       | -1.1                            | -1.0       | mitochondrial inner membrane protease subunit (by homology)                                    |  |                    |
| CA1632                             | orf19.11420         | IPF10181      |  | 1.1                              | 1.0         | 1.0        | 1.1      | YJR101W                       | RSM26         | 1.0        | 1.5        | -1.0                            | 1.1        | similar to Saccharomyces cerevisiae Rsm26p protein of the small subunit of the mitochondrial r |  |                    |
| CA1746                             | orf19.5050          | IPF10886      |  | -1.1                             | -1.1        | -1.2       | -1.1     | YGL236C                       | MTO1          | 1.0        | -1.4       | -1.7                            | -1.7       | unknown function                                                                               |  |                    |
| CA1845                             | orf19.637           | IPF11123      |  | 1.1                              | -1.1        | -1.1       | -1.1     | YLL041C                       | SDH2          | 1.0        | -1.1       | -1.3                            | -2.7       | similar to Saccharomyces cerevisiae Sdh2p succinate dehydrogenase iron-sulfur protein subun    |  |                    |
| CA1848                             |                     | IPF11128      |  | 1.0                              | 1.0         | 1.0        | -1.0     | YMR225C                       | MRPL44        |            |            |                                 |            | unknown function                                                                               |  |                    |
| CA3963                             | orf19.1422          | IPF11233      |  | -1.1                             | 1.0         | 1.1        | 1.1      | YBR179C                       | FZO1          | 1.0        | 1.1        | -1.1                            | 1.2        | similar to Saccharomyces cerevisiae Fzo1p required for biogenesis of mitochondria (by homol    |  |                    |
| CA1669                             | orf19.2852          | IPF11393      |  | 1.3                              | -1.0        | -1.2       | 1.1      | YBL090W                       | MRP21         | 1.0        | 1.0        | -1.1                            | -1.4       | unknown function                                                                               |  |                    |
| CA3666                             | orf19.6461          | IPF11435      |  | 1.0                              | -1.1        | 1.1        | -1.0     | YDR231C                       | COX20         | 1.0        | 1.1        | -1.1                            | -1.1       | unknown function                                                                               |  |                    |
| CA3109                             | orf19.6548          | IPF11829      |  | 1.2                              | -1.0        | -1.1       | -1.1     | YPL135W                       | ISU1          | 1.0        | 1.0        | 1.1                             | 1.1        | unknown function                                                                               |  |                    |
| CA4829                             | orf19.2067          | IPF1210       |  | -1.0                             | 1.1         | 1.1        | 1.1      | YKL040C                       | NFU1          | 1.0        | 1.1        | -1.0                            | -1.0       | similar to Saccharomyces cerevisiae Nfu1p involved in homeostasis (by homology)                |  |                    |
| CA3419                             | orf19.6136          | IPF12778      |  | 1.1                              | -1.3        | -1.3       | -1.1     | YLR439W                       | MRPL4         | 1.0        | -1.7       | -2.1                            | -2.1       | ribosomal protein, mitochondrial (by homology)                                                 |  |                    |
| CA0370                             |                     | IPF13678      |  | 1.1                              | 1.2         | 1.6        | 1.3      | YDR276C                       | PMP3          | 1.0        | -1.1       | -1.1                            | -1.1       | unknown function                                                                               |  |                    |

|        |             |            |      |      |      |      |         |        |     |      |      |      |                                                                                                |
|--------|-------------|------------|------|------|------|------|---------|--------|-----|------|------|------|------------------------------------------------------------------------------------------------|
| CA4642 | orf19.349   | IPF1500    | -1.1 | -1.0 | 1.0  | 1.0  | YPR155C | NCA2   | 1.0 | 1.1  | 1.1  | -1.2 | similar to Saccharomyces cerevisiae Nca2p regulating expression of mitochondrial ATP synthase  |
| CA0032 | orf19.229   | IPF15248   | -1.0 | 1.0  | 1.0  | 1.0  | YOL054W |        | 1.0 | -1.1 | 1.0  | -1.1 | zinc finger protein (by homology)                                                              |
| CA1015 | orf19.11438 | IPF15547   | 1.0  | 1.0  | 1.1  | -1.0 | YMR293C |        | 1.0 | -1.1 | -1.5 | -1.4 | putative glutamyl-tRNA amidotransferase subunit A (by homology)                                |
| CA5413 |             | IPF1567    | 1.2  | 1.1  | 1.1  | 1.2  | YDR115W |        | 1.0 | -1.6 | -1.7 | -1.9 | mitochondrial ribosomal protein L34 (by homology)                                              |
| CA0010 | orf19.7790  | IPF16036   | 1.1  | 1.2  | 1.3  | 1.2  | YJL143W | TIM17  | 1.0 | -1.3 | -1.3 | 1.0  | similar to Saccharomyces cerevisiae Tim17p mitochondrial inner membrane import translocase     |
| CA2213 | orf19.4751  | IPF16405   | -1.0 | -1.3 | -1.1 | 1.1  | YIL093C | RSM25  | 1.0 | 1.1  | -1.1 | -1.1 | similar to saccharomyces cerevisiae Rsm25p protein of the small subunit of the mitochondrial r |
| CA0118 |             | IPF16430.3 | 1.1  | -1.1 | -1.0 | 1.1  | YFR033C | QCR6   | 1.0 | 1.3  | 1.1  | -1.6 | similar to Saccharomyces cerevisiae Qcr6p ubiquinol-cytochrome-c reductase 17K protein, 3-p    |
| CA2899 | orf19.3480  | IPF17681   | -1.3 | -1.5 | -1.7 | -1.5 | YGL129C | RSM23  | 1.0 | -1.1 | -1.1 | 1.2  | similar to Saccharomyces cerevisiae Rsm23p involved in mitochondrial function (by homology)    |
| CA0117 | orf19.916   | IPF19231   | 1.2  | 1.1  | 1.4  | 1.5  | YNL305C |        | 1.0 | 1.2  | 1.2  | -1.3 | unknown function                                                                               |
| CA4033 | orf19.3431  | IPF19795   | 1.1  | 1.1  | 1.0  | -1.0 | YOR330C | MIP1   | 1.0 | 1.1  | 1.3  | 1.4  | similar to Saccharomyces cerevisiae Mip1p DNA-directed DNA polymerase gamma catalytic su       |
| CA3027 | orf19.11381 | IPF20126   | -1.0 | -1.0 | 1.1  | -1.0 | YDR470C | UGO1   | 1.0 | -1.9 | -1.8 | -1.7 | putative chromosome segregation protein (by homology)                                          |
| CA5441 | orf19.3244  | IPF227     | 1.0  | -1.1 | -1.2 | 1.0  | YHR116W |        | 1.0 | -1.7 | -1.0 | 1.1  | unknown function                                                                               |
| CA5208 | orf19.7023  | IPF2361    | -1.1 | 1.0  | 1.0  | 1.0  | YLR455W |        | 1.0 | -1.5 | -2.3 | -2.4 | unknown function                                                                               |
| CA4298 | orf19.6698  | IPF2598    | 1.0  | 1.0  | -1.0 | 1.0  | YCR024C |        | 1.0 | 1.2  | 1.0  | 1.2  | unknown function                                                                               |
| CA5212 | orf19.7029  | IPF3050    | 1.1  | 1.0  | 1.0  | 1.0  | YDL238C |        | 1.0 | -2.1 | -1.8 | -1.4 | unknown function                                                                               |
| CA5222 | orf19.7041  | IPF3079    | -1.1 | -1.2 | -1.2 | -1.3 | YAL043C | PTA1   | 1.0 | -1.2 | -1.1 | -1.1 | similar to Saccharomyces cerevisiae Pta1p pre-tRNA processing protein (by homology)            |
| CA5224 | orf19.7043  | IPF3081    | 1.0  | 1.1  | 1.0  | -1.0 | YLR050C |        | 1.0 | -1.0 | -1.4 | -1.3 | unknown function                                                                               |
| CA1259 | orf19.10676 | IPF3174    | -1.1 | -1.0 | -1.0 | 1.0  | YPL172C | COX10  | 1.0 | -1.1 | -1.1 | -1.1 | Farnesyl transferase (by homology)                                                             |
| CA3484 | orf19.3574  | IPF3214    | 1.0  | 1.1  | -1.0 | -1.0 | YNL328C | MDJ2   | 1.0 | -1.1 | -1.0 | -1.0 | HSP-mitochondrial chaperone (by homology)                                                      |
| CA5684 | orf19.7386  | IPF3331    | 1.2  | 1.1  | 1.1  | -1.1 | YBR185C | MBA1   | 1.0 | -1.4 | -1.5 | -1.3 | unknown function                                                                               |
| CA4783 | orf19.4016  | IPF3358    | -1.1 | -1.3 | -1.6 | -1.4 | YBL045C | COR1   | 1.0 | -1.8 | -1.9 | -2.4 | ubiquinol-cytochrome-c reductase (by homology)                                                 |
| CA4785 | orf19.4018  | IPF3361    | 1.2  | -1.1 | -1.1 | -1.1 | YJR113C | RSM7   | 1.0 | 1.2  | 1.1  | 1.2  | putative mitochondrial ribosomal protein S7 (by homology)                                      |
| CA4789 | orf19.4023  | IPF3366    | 1.1  | 1.0  | 1.0  | 1.0  | YPR166C | MRP2   | 1.0 | -1.1 | -1.1 | -1.2 | Mitochondrial ribosomal protein (by homology)                                                  |
| CA5945 | orf19.6752  | IPF3492    | -1.0 | -1.0 | -1.1 | -1.0 | YDR041W | RSM10  | 1.0 | -1.5 | -1.1 | -1.1 | unknown function                                                                               |
| CA5056 | orf19.3022  | IPF3698    | 1.1  | -1.3 | -1.4 | -1.2 | YDR175C | RSM24  | 1.0 | -1.5 | -1.5 | -1.6 | similar to Saccharomyces cerevisiae Rsm24p mitochondrial ribosomal protein (S24) (by homol     |
| CA4867 | orf19.3844  | IPF4080    | -1.0 | 1.0  | -1.0 | 1.1  | YKL142W | MRP8   | 1.0 | -2.4 | -1.8 | -2.9 | similar to Saccharomyces cerevisiae Mrp8p ribosomal protein, mitochondrial (by homology)       |
| CA5800 | orf19.5450  | IPF4175    | 1.1  | -1.2 | -1.1 | -1.1 | YBR026C | MRP1   | 1.0 | 1.0  | -1.4 | -1.6 | mitochondrial respiratory function (by homology)                                               |
| CA4260 | orf19.549   | IPF4276    | 1.1  | -1.1 | -1.1 | -1.0 | YCR003W | MRPL32 | 1.0 | -1.1 | -1.1 | -1.2 | similar to Saccharomyces cerevisiae Mrpl32p putative mitochondrial ribosomal protein (by hom   |
| CA2524 | orf19.5521  | IPF4322    | 1.1  | -1.2 | -1.2 | -1.2 | YLL027W | ISA1   | 1.0 | -1.3 | -1.4 | -1.6 | unknown function                                                                               |
| CA3856 | orf19.6100  | IPF4641    | 1.1  | 1.1  | 1.1  | 1.0  | YDL142C | CRD1   | 1.0 | -1.3 | -1.1 | -1.1 | similar to Saccharomyces cerevisiae Crd1p cardiolipin synthase (by homology)                   |
| CA0986 | orf19.3350  | IPF4814    | -1.0 | -1.0 | -1.1 | -1.1 | YDR405W | MRP20  | 1.0 | -1.1 | -1.0 | 1.1  | similar to Saccharomyces cerevisiae Mrp20p ribosomal protein of the large subunit, mitochon    |
| CA2129 | orf19.414   | IPF4899    | -1.0 | -1.1 | -1.1 | 1.0  | YKL155C | RSM22  | 1.0 | -1.2 | -1.1 | 1.0  | unknown function                                                                               |
| CA6049 | orf19.7665  | IPF4935    | 1.0  | 1.1  | -1.0 | -1.0 | YJL003W |        | 1.0 | 1.0  | 1.1  | 1.0  | unknown function                                                                               |
| CA6056 | orf19.7675  | IPF4955    | 1.1  | -1.0 | 1.1  | -1.0 | YGR076C | MRPL25 | 1.0 | -3.0 | -5.8 | -4.0 | similar to Saccharomyces cerevisiae Mrpl25p ribosomal protein YmL25, mitochondrial (by hom     |
| CA4087 | orf19.6643  | IPF5013    | -1.0 | -1.1 | -1.1 | -1.0 | YOR221C | MCT1   | 1.0 | -1.0 | -1.0 | -1.0 | similar to Saccharomyces cerevisiae Mct1p malonyl-CoA:ACP transferase (by homology)            |
| CA4370 | orf19.5661  | IPF5279    | -1.2 | 1.1  | -1.1 | 1.0  | YHR076W |        | 1.0 | -1.2 | -1.2 | -1.2 | unknown function                                                                               |
| CA5589 | orf19.7111  | IPF5621    | -1.1 | -1.1 | -1.0 | -1.0 | YIL065C | FIS1   | 1.0 | -1.4 | -1.4 | -1.5 | unknown function                                                                               |
| CA4607 | orf19.3297  | IPF6223    | 1.1  | -1.0 | 1.1  | 1.0  | YGR215W | RSM27  | 1.0 | -1.4 | -1.3 | -1.2 | unknown function                                                                               |
| CA3446 | orf19.2977  | IPF7324    | -1.1 | -1.1 | -1.2 | -1.1 | YKL195W |        | 1.0 | -1.2 | -1.2 | -1.1 | unknown function                                                                               |
| CA1768 | orf19.5201  | IPF7585    | 1.1  | 1.0  | 1.0  | 1.1  | YER050C | RSM18  | 1.0 | 1.1  | 1.2  | 1.0  | unknown function                                                                               |
| CA2930 | orf19.4204  | IPF7840    | 1.0  | -1.1 | -1.1 | -1.0 | YOR158W | PET123 | 1.0 | -1.3 | -1.2 | -1.3 | similar to Saccharomyces cerevisiae Pet123p ribosomal protein, mitochondrial (by homology)     |
| CA0940 |             | IPF8616    | 1.1  | 1.0  | 1.0  | -1.0 | YNR037C | YMR19  | 1.0 | -1.1 | 1.0  | 1.1  | similar to Saccharomyces cerevisiae Rsm19p ribosomal protein (by homology)                     |
| CA2465 | orf19.1795  | IPF8726    | 1.0  | -1.1 | 1.2  | 1.0  | YLL013C | PUF3   | 1.0 | -1.1 | -1.2 | -1.2 | unknown function                                                                               |
| CA4226 | orf19.828   | IPF8752    | -1.1 | -1.2 | -1.3 | -1.1 | YMR193W | MRPL24 | 1.0 | 1.1  | -1.0 | -1.3 | similar to Saccharomyces cerevisiae Mrpl24p ribosomal protein of the large subunit, mitochon   |
| CA1976 | orf19.688   | IPF9582    | 1.1  | -1.1 | -1.2 | -1.0 | YNL306W | MRPS18 | 1.0 | -1.3 | -1.5 | -1.7 | similar to Saccharomyces cerevisiae Mrps18p ribosomal protein of the small subunit, mitochon   |
| CA3088 | orf19.11621 | IPF9826    | -1.2 | -1.1 | 1.1  | 1.1  | YLR256W | HAP1   | 1.0 | -1.4 | -1.4 | -1.1 | unknown function                                                                               |
| CA5895 | orf19.6811  | ISA2       | 1.1  | 1.1  | 1.1  | 1.0  | YPR067W | ISA2   | 1.0 | -1.6 | -1.4 | -1.4 | Mitochondrial protein required for iron metabolism (by homology)                               |
| CA2742 | orf19.2104  | JAC1       | -1.0 | 1.1  | 1.0  | -1.1 | YGL018C | JAC1   | 1.0 | -1.1 | 1.2  | 1.1  | molecular chaperone (by homology)                                                              |
| CA5205 | orf19.7020  | KEX1       | -1.2 | 1.1  | -1.0 | 1.1  | YGL203C | KEX1   | 1.0 | -1.3 | -1.2 | 1.0  | Carboxypeptidase-alpha (by homology)                                                           |
| CA3149 | orf19.6165  | KGD1       | 1.1  | -2.0 | -2.1 | -2.0 | YIL125W | KGD1   | 1.0 | -2.5 | -2.1 | -3.6 | 2-oxoglutarate dehydrogenase                                                                   |
| CA2997 | orf19.6126  | KGD2       | -1.4 | -2.7 | -3.2 | -2.6 | YDR148C | KGD2   | 1.0 | -1.9 | -1.6 | -2.7 | 2-oxoglutarate dehydrogenase complex E2 component (by homology)                                |
| CA2998 | orf19.6127  | LPD1       | -1.3 | -1.9 | -2.6 | -2.0 | YFL018C | LPD1   | 1.0 | -1.9 | -2.1 | -2.1 | dihydropyridine dehydrogenase (by homology)                                                    |
| CA0791 | orf19.3358  | LSC1       | 1.1  | -1.9 | -1.8 | -1.7 | YOR142W | LSC1   | 1.0 | -1.4 | -1.4 | -1.6 | succinate-CoA ligase / synthetase (by homology)                                                |
| CA0664 | orf19.710   | LSC2.3EOC1 | 1.0  | -2.7 | -2.9 | -2.7 | YGR244C | LSC2   | 1.0 | 1.1  | -1.3 | -2.7 | succinate-CoA ligase beta subunit, 3-prime end (by homology)                                   |
| CA3757 | orf19.3419  | MAE1       | -1.2 | 1.0  | 1.2  | -1.2 | YKL029C | MAE1   | 1.0 | 1.2  | 1.8  | 4.4  | mitochondrial malic enzyme (by homology)                                                       |
| CA5316 | orf19.7187  | MAM33      | 1.3  | -1.5 | -1.4 | -1.4 | YIL070C | MAM33  | 1.0 | -1.2 | -1.2 | -1.5 | Mitochondrial acidic matrix protein (by homology)                                              |
| CA3234 | orf19.6295  | MAS2       | -1.1 | -1.0 | -1.1 | -1.1 | YHR024C | MAS2   | 1.0 | -1.1 | -1.2 | -1.1 | processing peptidase, catalytic 53kDa (alpha) subunit, mitochondrial (by homology)             |
| CA5209 | orf19.7025  | MCM1       | 1.0  | -1.0 | 1.2  | 1.0  | YMR043W | MCM1   | 1.0 | -1.2 | 1.1  | 1.2  | Transcription factor of the MADS box (by homology)                                             |
| CA5164 | orf19.4602  | MDH1       | 1.2  | -1.4 | -1.4 | -1.4 | YKL085W | MDH1   | 1.0 | -1.3 | -1.5 | -3.0 | Mitochondrial malate dehydrogenase precursor (by homology)                                     |
| CA5489 | orf19.5323  | MDH12      | 1.2  | -1.1 | 1.2  | -1.0 | YDL078C | MDH3   | 1.0 | -1.0 | -1.2 | -1.7 | mitochondrial malate dehydrogenase (by homology)                                               |
| CA4275 | orf19.6672  | MDJ1       | 1.0  | 1.0  | 1.0  | 1.0  | YFL016C | MDJ1   | 1.0 | 1.0  | 1.1  | -1.2 | Heat shock protein - chaperone (by homology)                                                   |
| CA0236 | orf19.7814  | MDM10      | 1.0  | -1.0 | -1.0 | -1.0 | YAL010C | MDM10  | 1.0 | 1.0  | 1.0  | 1.0  | Involved in mitochondrial morphology and inheritance (by homology)                             |
| CA4582 | orf19.6900  | MDM12      | -1.1 | -1.0 | -1.1 | -1.1 | YOL009C | MDM12  | 1.0 | -1.1 | 1.0  | -1.1 | Involved in mitochondrial inheritance (by homology)                                            |
| CA3603 | orf19.4932  | MEF1       | -1.3 | -1.8 | -2.0 | -2.0 | YLR069C | MEF1   | 1.0 | -2.3 | -5.7 | -2.6 | mitochondrial translation elongation factor G (by homology)                                    |
| CA3212 | orf19.6208  | MEF2       | -1.1 | -1.4 | -1.3 | -1.4 | YJL102W | MEF2   | 1.0 | -1.3 | -1.4 | -1.5 | translation elongation factor (by homology)                                                    |
| CA1738 | orf19.2524  | MGE1       | 1.1  | 1.0  | 1.1  | -1.0 | YOR232W | MGE1   | 1.0 | -1.0 | -1.3 | -1.3 | heat shock protein (by homology)                                                               |
| CA2773 | orf19.2690  | MGM1       | -1.1 | -1.2 | -1.1 | -1.1 | YOR211C | MGM1   | 1.0 | -1.2 | 1.1  | 1.1  | GTPase                                                                                         |



|        |             |                   |      |      |      |      |         |               |     |      |      |      |                                                                                       |                                      |
|--------|-------------|-------------------|------|------|------|------|---------|---------------|-----|------|------|------|---------------------------------------------------------------------------------------|--------------------------------------|
| CA4177 | orf19.2956  | <i>MGM101</i>     | -1.0 | 1.0  | 1.1  | 1.0  | YJR144W | <i>MGM101</i> | 1.0 | -2.4 | -2.3 | -2.0 | mitochondrial genome maintenance                                                      | protein (by homology)                |
| CA1374 | orf19.1195  | <i>MIP1</i>       | -1.2 | 1.0  | 1.1  | -1.1 | YKL134C | <i>01-Oct</i> | 1.0 | -1.7 | -1.8 | -2.2 | Mitochondrial intermediate peptidase (by homology)                                    |                                      |
| CA1513 | orf19.4885  | <i>MIR1</i>       | -1.0 | -1.0 | -1.0 | -1.1 | YJR077C | <i>MIR1</i>   | 1.0 | -1.3 | -1.2 | -1.3 | phosphate transport protein, mitochondrial (MCF) (by homology)                        |                                      |
| CA2250 | orf19.2364  | <i>MIS11</i>      | -1.0 | -1.3 | -1.3 | -1.3 | YBR084W | <i>MIS1</i>   | 1.0 | -1.6 | -1.3 | 1.3  | mitochondrial C1-tetrahydrofolate synthase precursor (by homology)                    |                                      |
| CA1937 | orf19.4187  | <i>MMM1</i>       | 1.0  | -1.0 | -1.1 | -1.0 | YLL006W | <i>MMM1</i>   | 1.0 | 1.1  | -1.0 | -1.2 | mitochondrial outer membrane protein (by homology)                                    |                                      |
| CA5405 | orf19.947   | <i>MRP17</i>      | 1.0  | 1.0  | -1.0 | 1.1  | YKL003C | <i>MRP17</i>  | 1.0 | -1.3 | -1.4 | -1.5 | Mitochondrial ribosomal protein (by homology)                                         |                                      |
| CA1428 | orf19.13170 | <i>MRP4</i>       | -1.3 | -1.5 | -1.4 | -1.3 | YHL004W | <i>MRP4</i>   | 1.0 | -1.0 | -1.2 | -1.2 | Ribosomal protein of the small subunit mitochondrial (by homology)                    |                                      |
| CA1445 | orf19.185   | <i>MRP51</i>      | 1.1  | -1.0 | -1.0 | 1.0  | YPL118W | <i>MRP51</i>  | 1.0 | -1.2 | -1.4 | -1.5 | Mitochondrial ribosomal protein of the small subunit (by homology)                    |                                      |
| CA5329 | orf19.7203  | <i>MRP7</i>       | -1.1 | -1.2 | -1.1 | -1.1 | YNL005C | <i>MRP7</i>   | 1.0 | 1.1  | 1.0  | -1.1 | Mitochondrial ribosomal protein YmL2 precursor (by homology)                          |                                      |
| CA1421 | orf19.11278 | <i>MRPL11</i>     | 1.1  | -1.3 | -1.2 | -1.1 | YDL202W | <i>MRPL11</i> | 1.0 | 1.2  | 1.2  | -1.0 | Mitochondrial ribosomal protein (by homology)                                         |                                      |
| CA0910 | orf19.9569  | <i>MRPL16</i>     | 1.3  | -1.0 | -1.1 | 1.1  | YBL038W | <i>MRPL16</i> | 1.0 | -1.6 | -1.7 | 1.1  | ribosomal protein                                                                     |                                      |
| CA3432 | orf19.585   | <i>MRPL17</i>     | 1.1  | -1.0 | 1.2  | 1.1  | YNL252C | <i>MRPL17</i> | 1.0 | -1.0 | 1.1  | -1.1 | ribosomal protein of the large subunit                                                | (YmL30), mitochondrial (by homology) |
| CA3009 | orf19.13611 | <i>MRPL19</i>     | -1.0 | -1.0 | -1.1 | -1.1 | YNL185C | <i>MRPL19</i> | 1.0 | -1.2 | 1.0  | -1.1 | Ribosomal protein (by homology)                                                       |                                      |
| CA2725 | orf19.10856 | <i>MRPL23A</i>    | 1.0  | -1.0 | 1.0  | 1.0  | YOR150W | <i>MRPL23</i> | 1.0 | -1.4 | -1.4 | -1.6 | mitochondrial ribosomal protein L23 (by homology)                                     |                                      |
| CA5089 | orf19.3064  | <i>MRPL27</i>     | 1.1  | 1.0  | 1.0  | 1.0  | YBR282W | <i>MRPL27</i> | 1.0 | -1.1 | -1.2 | -1.2 | ribosomal protein (by homology)                                                       |                                      |
| CA3872 | orf19.397   | <i>MRPL28</i>     | 1.0  | -1.0 | -1.2 | -1.0 | YDR462W | <i>MRPL28</i> | 1.0 | -1.4 | -1.3 | -1.6 | mitochondrial ribosomal protein of the large subunit (by homology)                    |                                      |
| CA0089 | orf19.5064  | <i>MRPL3</i>      | -1.0 | -1.2 | -1.0 | -1.1 | YMR024W | <i>MRPL3</i>  | 1.0 | 1.1  | 1.1  | 1.0  | ribosomal protein of the large subunit, mitochondrial (by homology)                   |                                      |
| CA0908 | orf19.1485  | <i>MRPL31</i>     | 1.3  | 1.1  | 1.2  | 1.1  | YKL138C | <i>MRPL31</i> | 1.0 | 1.0  | -1.1 | -1.4 | Mitochondrial ribosomal protein                                                       |                                      |
| CA2142 |             | <i>MRPL33</i>     | 1.0  | 1.1  | 1.0  | 1.0  | YMR286W | <i>MRPL33</i> |     |      |      |      | ribosomal protein of the large subunit, mitochondrial (by homology)                   |                                      |
| CA1863 | orf19.863   | <i>MRPL35</i>     | -1.2 | -1.3 | -1.4 | -1.1 | YDR322W | <i>MRPL35</i> | 1.0 | -1.1 | -1.1 | 1.1  | Ribosomal protein of the large subunit, mitochondrial (by homology)                   |                                      |
| CA2481 | orf19.3205  | <i>MRPL36</i>     | -1.0 | -1.2 | -1.2 | -1.1 | YBR122C | <i>MRPL36</i> | 1.0 | 1.1  | -1.1 | -1.1 | ribosomal protein YmL36 precursor, mitochondrial (by homology)                        |                                      |
| CA1928 | orf19.755   | <i>MRPL37</i>     | 1.0  | 1.0  | 1.0  | 1.0  | YBR268W | <i>MRPL37</i> | 1.0 | -1.0 | -1.0 | -1.3 | Mitochondrial ribosomal protein YmL37 (by homology)                                   |                                      |
| CA4521 | orf19.484   | <i>MRPL40</i>     | -1.1 | -1.3 | -1.4 | -1.2 | YPL173W | <i>MRPL40</i> | 1.0 | 1.0  | -1.2 | -1.3 | Putative mitochondrial ribosomal protein (by homology)                                |                                      |
| CA4434 | orf19.5161  | <i>MRPL49</i>     | 1.5  | 1.1  | 1.4  | 1.2  | YJL096W | <i>MRPL49</i> | 1.0 | -1.3 | -1.4 | -1.5 | ribosomal protein mitochondrial                                                       |                                      |
| CA5831 | orf19.7486  | <i>MRPL6</i>      | 1.1  | -1.0 | -1.1 | 1.0  | YHR147C | <i>MRPL6</i>  | 1.0 | -1.2 | -1.6 | -1.7 | ribosomal protein L6 precursor, mitochondrial (by homology)                           |                                      |
| CA2377 | orf19.2214  | <i>MRPL7</i>      | 1.0  | 1.0  | -1.1 | -1.0 | YDR237W | <i>MRPL7</i>  |     |      |      |      | Ribosomal protein of the large subunit, mitochondrial (by homology)                   |                                      |
| CA2999 | orf19.6129  | <i>MRPL8</i>      | 1.0  | 1.2  | 1.2  | 1.1  | YJL063C | <i>MRPL8</i>  | 1.0 | 1.0  | 1.3  | 1.2  | mitochondrial 60s ribosomal subunit (by homology)                                     |                                      |
| CA5830 | orf19.7485  | <i>MRPL9</i>      | 1.1  | -1.0 | -1.2 | -1.0 | YGR220C | <i>MRPL9</i>  | 1.0 | -1.1 | -1.3 | -1.2 | Mitochondrial ribosomal protein of the large subunit (by homology)                    |                                      |
| CA0462 | orf19.2520  | <i>MRPS28</i>     | 1.0  | -1.1 | -1.1 | -1.1 | YDR337W | <i>MRPS28</i> | 1.0 | -1.0 | -1.1 | 1.1  | ribosomal protein (by homology)                                                       |                                      |
| CA3526 | orf19.8604  | <i>MRPS5</i>      | -1.0 | -1.3 | -1.3 | -1.2 | YBR251W | <i>MRPS5</i>  | 1.0 | 1.1  | 1.1  | -1.0 | Probable ribosomal protein S5, mitochondrial (by homology)                            |                                      |
| CA1109 | orf19.5230  | <i>MRPS9</i>      | 1.1  | -1.0 | -1.0 | 1.0  | YBR146W | <i>MRPS9</i>  | 1.0 | 1.2  | 1.4  | 1.2  | ribosomal protein S9 small subunit precursor                                          |                                      |
| CA2271 | orf19.2597  | <i>MRS2</i>       | -1.0 | 1.0  | -1.0 | 1.0  | YOR334W | <i>MRS2</i>   | 1.0 | -1.2 | -1.3 | -1.1 | Mitochondrial RNA splicing protein (by homology)                                      |                                      |
| CA3741 | orf19.2178  | <i>MRS4</i>       | 1.1  | 1.2  | 1.3  | 1.3  | YKR052C | <i>MRS4</i>   | 1.0 | -1.4 | -1.3 | -1.3 | RNA splicing protein and member of the mitochondrial carrier family (MCF) by homology |                                      |
| CA3648 | orf19.2039  | <i>MSF1</i>       | -1.1 | -1.1 | -1.1 | -1.1 | YPR047W | <i>MSF1</i>   | 1.0 | -1.4 | -1.4 | -1.6 | phenylalanine--tRNA ligase                                                            |                                      |
| CA2036 | orf19.4362  | <i>MSP1</i>       | 1.0  | -1.0 | 1.0  | 1.0  | YGR028W | <i>MSP1</i>   | 1.0 | -1.1 | -1.0 | -1.0 | 40 kDa putative membrane-spanning ATPase                                              |                                      |
| CA3651 | orf19.2042  | <i>MSS1</i>       | -1.1 | -1.1 | -1.0 | 1.1  | YMR023C | <i>MSS1</i>   | 1.0 | 1.1  | 1.5  | 1.2  | Mitochondrial GTPase involved in expression of COX1 (by homology).                    |                                      |
| CA1945 | orf19.4739  | <i>MSS116</i>     | -1.0 | -1.1 | -1.0 | -1.0 | YDR194C | <i>MSS116</i> | 1.0 | -1.7 | -1.7 | -1.4 | RNA helicase of the DEAD box family (by homology)                                     |                                      |
| CA5220 | orf19.7038  | <i>MVP1.EXON2</i> | 1.1  | 1.0  | -1.0 | 1.0  | YMR004W | <i>MVP1</i>   | 1.0 | 1.0  | 1.0  | 1.0  | Required for vacuolar protein sorting, exon 2 (by homology)                           |                                      |
| CA4508 | orf19.498   | <i>NAM9</i>       | -1.1 | -1.1 | -1.2 | -1.1 | YNL137C | <i>NAM9</i>   | 1.0 | -1.3 | -1.2 | -1.4 | mitochondrial ribosomal protein                                                       |                                      |
| CA4633 | orf19.339   | <i>NDH1</i>       | -1.2 | 3.1  | 3.7  | 2.9  | YMR145C |               | 1.0 | -1.0 | 1.2  | -1.0 | Mitochondrial NADH dehydrogenase                                                      |                                      |
| CA5417 | orf19.967   | <i>NUC1</i>       | 1.0  | 1.0  | 1.1  | -1.0 | YJL208C | <i>NUC1</i>   | 1.0 | -1.4 | -1.1 | -1.2 | Nuclease, mitochondrial                                                               |                                      |
| CA5710 | orf19.7411  | <i>OAC1</i>       | 1.0  | 1.1  | 1.0  | -1.0 | YKL120W | <i>OAC1</i>   | 1.0 | 1.1  | 1.2  | 1.4  | Mitochondrial oxaloacetate transport protein (by homology)                            |                                      |
| CA4878 | orf19.6565  | <i>OXA1</i>       | -1.0 | -1.2 | -1.2 | -1.2 | YER154W | <i>OXA1</i>   | 1.0 | 1.5  | 1.7  | -1.1 | Cytochrome oxidase biogenesis protein (by homology)                                   |                                      |
| CA3308 | orf19.9845  | <i>PET127</i>     | -1.0 | -1.1 | -1.0 | -1.0 | YOR017W | <i>PET127</i> | 1.0 | -1.3 | 1.1  | 1.1  | component of mitochondrial translation (by homology)                                  |                                      |
| CA5759 |             | <i>PET191.3</i>   | 1.0  | 1.0  | 1.1  | 1.0  | YJR034W | <i>PET191</i> | 1.0 | -1.2 | -1.4 | -1.4 | Assembly of cytochrome oxidase, 3-prime end (by homology)                             |                                      |
| CA0029 | orf19.182   | <i>PET56</i>      | -1.0 | 1.0  | -1.1 | -1.1 | YOR201C | <i>PET56</i>  | 1.0 | -1.7 | -1.1 | 1.2  | ribosomal RNA methylase (by homology)                                                 |                                      |
| CA4711 | orf19.6944  | <i>PHB1</i>       | -1.0 | -1.3 | -1.3 | -1.3 | YGR132C | <i>PHB1</i>   | 1.0 | -1.4 | -1.1 | -1.1 | Prohibitin, antiproliferative protein (by homology)                                   |                                      |
| CA6086 | orf19.5973  | <i>PHB2</i>       | -1.0 | -1.2 | -1.3 | 1.0  | YGR231C | <i>PHB2</i>   | 1.0 | 1.2  | 1.1  | -1.0 | Mitochondrial protein, prohibitin homolog (by homology)                               |                                      |
| CA3002 | orf19.6133  | <i>PIF1</i>       | -1.0 | -1.1 | -1.1 | -1.1 | YML061C | <i>PIF1</i>   | 1.0 | -1.6 | -1.7 | -1.6 | mitochondrial DNA helicase (by homology)                                              |                                      |
| CA5871 | orf19.7538  | <i>PIF2</i>       | 1.0  | 1.1  | 1.4  | 1.0  | YHR031C | <i>RRM3</i>   | 1.0 | -1.2 | -1.1 | -1.2 | DNA helicase (by homology)                                                            |                                      |
| CA4238 | orf19.522   | <i>PIM1</i>       | -1.0 | -1.0 | -1.1 | -1.2 | YBL022C | <i>PIM1</i>   | 1.0 | -1.2 | -1.2 | -1.2 | mitochondrial ATP-dependent protease (by homology)                                    |                                      |
| CA0919 | orf19.1042  | <i>POR1</i>       | 1.6  | -1.4 | -1.3 | -1.3 | YNL055C | <i>POR1</i>   | 1.0 | -1.1 | -1.2 | -1.7 | mitochondrial outer membrane porin (by homology)                                      |                                      |
| CA3070 | orf19.4807  | <i>PPA2</i>       | -1.1 | -1.2 | -1.2 | -1.2 | YMR267W | <i>PPA2</i>   | 1.0 | 1.0  | -1.2 | -1.3 | Mitochondrial inorganic pyrophosphatase                                               |                                      |
| CA5215 | orf19.7033  | <i>PPS1</i>       | 1.0  | 1.1  | 1.0  | 1.1  | YBR276C | <i>PPS1</i>   | 1.0 | 1.5  | -1.1 | 1.1  | protein tyrosine phosphatase (by homology)                                            |                                      |
| CA1349 | orf19.4351  | <i>PRP12</i>      | -1.2 | 1.1  | -1.0 | -1.2 | YMR302C | <i>PRP12</i>  | 1.0 | -1.4 | -1.2 | -1.3 | involved in early maturation of pre-rRNA (by homology)                                |                                      |
| CA1552 | orf19.4274  | <i>PUT1</i>       | -1.4 | -4.0 | -5.4 | -3.7 | YLR142W |               | 1.0 | -1.5 | -1.4 | -1.5 | proline oxidase (by homology)                                                         |                                      |
| CA3399 | orf19.3974  | <i>PUT2</i>       | -1.3 | -8.3 | -9.8 | -7.1 | YHR037W | <i>PUT2</i>   | 1.0 | -1.2 | -1.2 | 1.2  | 1-pyrroline-5-carboxylate dehydrogenase (by homology)                                 |                                      |
| CA2065 | orf19.2644  | <i>QCR2</i>       | 1.0  | -1.2 | -1.2 | -1.0 | YPR191W | <i>QCR2</i>   | 1.0 | -1.2 | -1.3 | -2.0 | Ubiquinol--cytochrome-c reductase 40KD chain II (by homology)                         |                                      |
| CA1441 |             | <i>QCR8</i>       | 1.5  | 1.0  | 1.1  | 1.1  | YJL166W | <i>QCR8</i>   | 1.0 | -1.5 | -1.4 | -1.5 | ubiquinol-cytochrome-c reductase chain VIII (by homology)                             |                                      |
| CA5217 | orf19.7035  | <i>RFC2</i>       | 1.1  | 1.0  | 1.0  | 1.0  | YJR068W | <i>RFC2</i>   | 1.0 | 1.0  | 1.1  | -1.1 | Replication factor (by homology)                                                      |                                      |
| CA1111 | orf19.12693 | <i>RIB3</i>       | 1.1  | 1.3  | 1.4  | 1.1  | YDR487C | <i>RIB3</i>   | 1.0 | 1.3  | 1.3  | 1.6  | 3,4-dihydroxy-2-butanone 4-phosphate synthase (by homology)                           |                                      |
| CA6149 | orf19.5893  | <i>RIP1</i>       | -1.5 | -1.5 | -1.7 | -1.5 | YEL024W | <i>RIP1</i>   | 1.0 | 1.1  | 1.2  | -1.1 | Ubiquinol cytochrome-c reductase (by homology)                                        |                                      |
| CA5776 | orf19.5420  | <i>RML2</i>       | -1.1 | -1.2 | -1.3 | -1.2 | YEL050C | <i>RML2</i>   | 1.0 | 1.0  | -1.3 | -1.3 | Ribosomal L2 protein, mitochondrial (by homology)                                     |                                      |
| CA4904 | orf19.6041  | <i>RPO41</i>      | -1.2 | -1.3 | -1.9 | -1.5 | YFL036W | <i>RPO41</i>  | 1.0 | -1.1 | -1.3 | -1.3 | Mitochondrial DNA-directed RNA polymerase (by homology)                               |                                      |
| CA5561 | orf19.7325  | <i>SCO1</i>       | 1.0  | 1.0  | 1.1  | 1.1  | YBR037C | <i>SCO1</i>   | 1.0 | -2.4 | -2.1 | -1.3 | Inner mitochondrial membrane protein (by homology)                                    |                                      |
| CA4063 | orf19.440   | <i>SDH11</i>      | -1.1 | -1.1 | -1.1 | -1.1 | YKL148C | <i>SDH1</i>   | 1.0 | -1.3 | -1.5 | -2.1 | Succinate dehydrogenase (by homology)                                                 |                                      |
| CA5398 | orf19.941   | <i>SEC14</i>      | -1.0 | -1.2 | -1.1 | -1.0 | YMR079W | <i>SEC14</i>  |     |      |      |      | phosphatidylinositol(PI)/phosphatidylcholine(PC) transfer                             |                                      |

|                  |             |        |            |             |             |             |         |       |            |             |             |             |                                                                                   |
|------------------|-------------|--------|------------|-------------|-------------|-------------|---------|-------|------------|-------------|-------------|-------------|-----------------------------------------------------------------------------------|
| CA4742           | orf19.4841  | SHY1   | 1.1        | -1.1        | 1.1         | 1.0         | YGR112W | SHY1  | 1.0        | -1.1        | 1.1         | 1.3         | SURF homologue protein (by homology)                                              |
| CA4540           | orf19.1462  | SMP2   | -1.1       | -1.0        | -1.1        | 1.0         | YMR165C | SMP2  | 1.0        | 1.1         | -1.1        | -1.2        | Involved in plasmid maintenance, respiration and cell proliferation (by homology) |
| CA4474           | orf19.1896  | SSC1   | 1.4        | -1.1        | -1.2        | -1.6        | YJR045C | SSC1  | 1.0        | -1.3        | -1.2        | -1.5        | Mitochondrial heat shock protein 70-related protein (by homology)                 |
| CA1911           | orf19.2435  | SSE1   | -1.5       | -1.5        | -1.7        | -1.5        | YPL106C | SSE1  | 1.0        | 1.2         | 2.0         | 2.8         | heat shock protein of HSP70 family (by homology)                                  |
| CA5213           | orf19.7030  | SSR1   | 1.4        | 1.2         | 1.5         | 1.1         | YLR390W | ECM19 | 1.0        | 1.2         | 1.4         | 1.4         | Secretory Stress Response protein 1 (by homology)                                 |
| CA6075           | orf19.5986  | THI4   | -1.0       | 1.0         | 1.0         | -1.1        | YGR144W | THI4  | 1.0        | 1.1         | 1.0         | 1.3         | Thiazole biosynthetic enzyme precursor (by homology)                              |
| CA5181           | orf19.4620  | TIM12  | 1.0        | 1.0         | 1.0         | 1.0         | YBR091C | MRS5  | 1.0        | -1.2        | -1.2        | -1.2        | subunit of the TIM22-complex (by homology)                                        |
| CA1893           | orf19.2754  | TIM13  | 1.0        | 1.1         | 1.1         | 1.1         | YGR181W | TIM13 | 1.0        | -2.1        | -1.8        | -1.7        | subunit of mitochondrial protein import machinery-like by homology                |
| CA0367           | orf19.1352  | TIM22  | -1.1       | 1.5         | 1.7         | 1.4         | YDL217C | TIM22 | 1.0        | 1.1         | 1.1         | 1.2         | Mitochondrial import inner membrane translocase subunit (by homology)             |
| CA5795           | orf19.5444  | TIM44  | -1.0       | -1.1        | -1.3        | -1.2        | YIL022W | TIM44 | 1.0        | -1.3        | -1.3        | -1.4        | mitochondrial inner membrane import receptor                                      |
| CA4179           | orf19.2953  | TOM20  | 1.2        | 1.1         | 1.5         | 1.4         | YGR082W | TOM20 | 1.0        | 1.2         | 1.1         | -1.1        | mitochondrial outer membrane import receptor subunit, 20 kD (by homology)         |
| CA1401           | orf19.3696  | TOM22  | 1.0        | -1.0        | 1.0         | 1.0         | YNL131W | TOM22 | 1.0        | -1.3        | -1.7        | -2.2        | mitochondrial outer membrane import receptor complex subunit (by homology)        |
| CA4954           | orf19.6524  | TOM40  | -1.3       | -1.3        | -1.4        | -1.5        | YMR203W | TOM40 | 1.0        | -1.1        | -1.0        | -1.1        | mitochondrial import receptor chain TOM40 (by homology)                           |
| CA1043           | orf19.9219  | TOM6   | 1.0        | -1.1        | 1.1         | -1.1        | YOR045W | TOM6  | 1.0        | 1.1         | -1.1        | -1.8        | mitochondrial outer membrane import receptor subunit (by homology)                |
| CA5218           | orf19.7036  | WHI2   | -1.1       | -1.1        | -1.1        | -1.1        | YOR043W | WHI2  | 1.0        | -1.5        | -1.2        | -1.2        | Growth regulation factor (by homology)                                            |
| CA5219           | orf19.7037  | YAE1   | 1.0        | -1.2        | 1.1         | 1.0         | YJR067C | YAE1  | 1.0        | -1.2        | -1.4        | -1.5        | Essential protein                                                                 |
| CA1477           | orf19.1252  | YME1   | -1.2       | -1.3        | -1.3        | -1.2        | YPR024W | YME1  | 1.0        | -1.1        | 1.5         | 1.2         | family of ATPases                                                                 |
| CA5204           | orf19.7019  | YML6   | -1.0       | -1.2        | -1.1        | -1.1        | YML025C |       |            |             |             |             | Ribosomal protein, mitochondrial (by homology)                                    |
| CA4537           | orf19.1466  | YNT2   | 1.1        | -1.1        | 1.0         | -1.0        | YLR059C | REX2  | 1.0        | -1.6        | -1.9        | -1.7        | suppressor of rna12/yme2 (by homology)                                            |
| CA2269           | orf19.2599  | YOR100 | 1.2        | -1.8        | -2.0        | -1.6        | YOR100C | CRC1  | 1.0        | -1.1        | -1.1        | -1.1        | Putative mitochondrial carrier protein                                            |
| CA4838           | orf19.2057  | YTA12  | -1.4       | -1.3        | -1.8        | -1.5        | YMR089C | YTA12 | 1.0        | -1.3        | 1.2         | -1.1        | Protease of the SEC18/CDC48/PAS1 family of ATPases (AAA) (by homology)            |
| <b>Mean</b>      |             |        | <b>0.1</b> | <b>-0.4</b> | <b>-0.4</b> | <b>-0.3</b> |         |       | <b>1.0</b> | <b>-0.7</b> | <b>-0.7</b> | <b>-0.9</b> |                                                                                   |
| <b>COX genes</b> |             |        |            |             |             |             |         |       |            |             |             |             |                                                                                   |
| CA3958           | orf19.1416  | COX11  | 1.1        | 1.1         | 1.3         | 1.0         | YPL132W | COX11 | 1.0        | -1.1        | -1.0        | -1.2        | cytochrome-c oxidase assembly protein by homology to S. cerevisiae                |
| CA4536           | orf19.1467  | COX13  | 1.2        | -1.0        | 1.1         | 1.2         | YGL191W | COX13 | 1.0        | -1.2        | -1.5        | -2.4        | cytochrome-c oxidase chain VIa (by homology)                                      |
| CA1688           | orf19.3656  | COX15  | -1.1       | 2.0         | 2.6         | 2.5         | YER141W | COX15 | 1.0        | -1.4        | -1.4        | -1.6        | cytochrome oxidase assembly factor (by homology)                                  |
| CA1090           | orf19.3946  | COX18  | -1.0       | 1.0         | 1.3         | 1.1         | YGR062C | COX18 | 1.0        | -1.1        | -1.2        | -1.1        | protein required for activity of mitochondrial cytochrome oxidase (by homology)   |
| CA4533           | orf19.1471  | COX4   | 1.2        | 1.1         | 1.3         | 1.1         | YGL187C | COX4  | 1.0        | 1.1         | -1.0        | -1.9        | cytochrome-c oxidase (by homology)                                                |
| CA2630           | orf19.12223 | COX5A  | 1.3        | -1.1        | 1.4         | 1.1         | YNL052W | COX5A | 1.0        | 1.3         | 1.4         | -1.4        | cytochrome-c oxidase chain V.A precursor (by homology)                            |
| CA0031           | orf19.227   | COX7   | 1.0        | -1.0        | 1.0         | 1.1         | YMR256C | COX7  |            |             |             |             | Subunit VII of cytochrome c oxidase (by homology)                                 |
| CA2134           | orf19.5213  | COX8   | 1.5        | 1.3         | 1.4         | 1.5         | YLR395C | COX8  | 1.0        | -1.1        | -1.2        | -1.5        | CYTOCHROME C OXIDASE (by homology)                                                |
| <b>Mean</b>      |             |        | <b>0.7</b> | <b>0.4</b>  | <b>1.4</b>  | <b>1.3</b>  |         |       | <b>1.0</b> | <b>-0.5</b> | <b>-0.9</b> | <b>-1.6</b> |                                                                                   |

### PCR primers to generate gene-specific probes

| <b>Gene</b>    | <b>Primer</b> | <b>Sequence (5'--&gt;3')</b> |
|----------------|---------------|------------------------------|
| HXT62          | HXT62-F       | AAGAGTTGGTATCATGACTGC        |
| HXT62          | HXT62-R       | GCCCAAGCAAAACATAAACCT        |
| <i>PCK1</i>    | PCK1-F        | ATCTGTGCTAGAGCTTACCATGC      |
| <i>PCK1</i>    | PCK1-R        | CCAGCATATTCAGTACCCAAGAT      |
| <i>IPF3584</i> | IPF3584-F     | AGCCATCGATAACAAAGC           |
| <i>IPF3584</i> | IPF3584-R     | GCCTTAACAGCAGATTCAT          |
| <i>QDR1</i>    | QDR1-F        | AGGGAGTATTATTGTTTTCTGTGC     |
| <i>QDR1</i>    | QDR1-R        | GCACGATAGTCAATGTTAGTCTAGAT   |
| <i>TEF3</i>    | TEF3-F        | GGGTAATTGTTAATCTCTGG         |
| <i>TEF3</i>    | TEF3-R        | ATAAAGCATCAGGAAGCAGCA        |
